# Supplementary material
Source: ML conference proceedings conference paper supplement (https://proceedings.mlr.press/v108/ishibashi20a.html)
Supplement: Supplementary file 2 [file ishibashi20a-supp.zip]

Archive with 303 entries (183 files):
- 137_supp/
- 137_supp/.DS_Store
- __MACOSX/
- __MACOSX/137_supp/
- __MACOSX/137_supp/._.DS_Store
- 137_supp/program/
- 137_supp/program/get_dataset.py
- 137_supp/program/.DS_Store
- __MACOSX/137_supp/program/
- __MACOSX/137_supp/program/._.DS_Store
- 137_supp/program/dataset/
- 137_supp/program/dataset/.DS_Store
- __MACOSX/137_supp/program/dataset/
- __MACOSX/137_supp/program/dataset/._.DS_Store
- 137_supp/program/dataset/power_plant/
- 137_supp/program/dataset/power_plant/.DS_Store
- __MACOSX/137_supp/program/dataset/power_plant/
- __MACOSX/137_supp/program/dataset/power_plant/._.DS_Store
- 137_supp/program/dataset/power_plant/Readme.txt~
- __MACOSX/137_supp/program/dataset/power_plant/._Readme.txt~
- 137_supp/program/dataset/power_plant/ccpp.txt
- __MACOSX/137_supp/program/dataset/power_plant/._ccpp.txt
- 137_supp/program/dataset/power_plant/Readme.txt
- __MACOSX/137_supp/program/dataset/power_plant/._Readme.txt
- 137_supp/program/dataset/power_plant/Folds5x2_pp.xlsx
- __MACOSX/137_supp/program/dataset/power_plant/._Folds5x2_pp.xlsx
- 137_supp/program/dataset/power_plant/Folds5x2_pp.ods
- __MACOSX/137_supp/program/dataset/power_plant/._Folds5x2_pp.ods
- __MACOSX/137_supp/program/dataset/._power_plant
- 137_supp/program/dataset/concrete/
- 137_supp/program/dataset/concrete/Concrete_Readme.txt
- __MACOSX/137_supp/program/dataset/concrete/
- __MACOSX/137_supp/program/dataset/concrete/._Concrete_Readme.txt
- 137_supp/program/dataset/concrete/concrete_data.txt
- 137_supp/program/dataset/concrete/Concrete_Data.xls
- __MACOSX/137_supp/program/dataset/concrete/._Concrete_Data.xls
- __MACOSX/137_supp/program/dataset/._concrete
- 137_supp/program/dataset/airfoil/
- 137_supp/program/dataset/airfoil/.DS_Store
- __MACOSX/137_supp/program/dataset/airfoil/
- __MACOSX/137_supp/program/dataset/airfoil/._.DS_Store
- 137_supp/program/dataset/airfoil/airfoil_self_noise.txt
- __MACOSX/137_supp/program/dataset/airfoil/._airfoil_self_noise.txt
- 137_supp/program/dataset/yacht/
- 137_supp/program/dataset/yacht/.DS_Store
- __MACOSX/137_supp/program/dataset/yacht/
- __MACOSX/137_supp/program/dataset/yacht/._.DS_Store
- 137_supp/program/dataset/yacht/hydro.txt
- __MACOSX/137_supp/program/dataset/yacht/._hydro.txt
- 137_supp/program/dataset/protein/
- 137_supp/program/dataset/protein/CASP.txt
- __MACOSX/137_supp/program/dataset/protein/
- __MACOSX/137_supp/program/dataset/protein/._CASP.txt
- __MACOSX/137_supp/program/._dataset
- 137_supp/program/active_learning.py
- 137_supp/program/evaluation.py
- 137_supp/program/results/
- 137_supp/program/results/.DS_Store
- __MACOSX/137_supp/program/results/
- __MACOSX/137_supp/program/results/._.DS_Store
- 137_supp/program/results/power_plant/
- 137_supp/program/results/power_plant/ex_power_plant.pdf
- __MACOSX/137_supp/program/results/power_plant/
- __MACOSX/137_supp/program/results/power_plant/._ex_power_plant.pdf
- 137_supp/program/results/power_plant/e_stop_power_plant.txt
- __MACOSX/137_supp/program/results/power_plant/._e_stop_power_plant.txt
- 137_supp/program/results/concrete/
- 137_supp/program/results/concrete/e_stop_concrete.txt
- __MACOSX/137_supp/program/results/concrete/
- __MACOSX/137_supp/program/results/concrete/._e_stop_concrete.txt
- 137_supp/program/results/concrete/ex_concrete.pdf
- __MACOSX/137_supp/program/results/concrete/._ex_concrete.pdf
- 137_supp/program/results/artificial/
- 137_supp/program/results/artificial/ex_artificial.pdf
- __MACOSX/137_supp/program/results/artificial/
- __MACOSX/137_supp/program/results/artificial/._ex_artificial.pdf
- 137_supp/program/results/artificial/e_stop_artificial.txt
- __MACOSX/137_supp/program/results/artificial/._e_stop_artificial.txt
- 137_supp/program/results/airfoil/
- 137_supp/program/results/airfoil/.DS_Store
- __MACOSX/137_supp/program/results/airfoil/
- __MACOSX/137_supp/program/results/airfoil/._.DS_Store
- 137_supp/program/results/airfoil/ex_airfoil.pdf
- __MACOSX/137_supp/program/results/airfoil/._ex_airfoil.pdf
- 137_supp/program/results/airfoil/e_stop_airfoil.txt
- __MACOSX/137_supp/program/results/airfoil/._e_stop_airfoil.txt
- 137_supp/program/results/yacht/
- 137_supp/program/results/yacht/e_stop_yacht.txt
- __MACOSX/137_supp/program/results/yacht/
- __MACOSX/137_supp/program/results/yacht/._e_stop_yacht.txt
- 137_supp/program/results/yacht/ex_yacht.pdf
- __MACOSX/137_supp/program/results/yacht/._ex_yacht.pdf
- 137_supp/program/results/protein/
- 137_supp/program/results/protein/e_stop_protein.txt
- __MACOSX/137_supp/program/results/protein/
- __MACOSX/137_supp/program/results/protein/._e_stop_protein.txt
- 137_supp/program/results/protein/ex_protein.pdf
- __MACOSX/137_supp/program/results/protein/._ex_protein.pdf
- 137_supp/program/results/best_threshhold.txt
- __MACOSX/137_supp/program/results/._best_threshhold.txt
- 137_supp/program/stopping_criterion.py
- 137_supp/program/.git/
- 137_supp/program/.git/config
- 137_supp/program/.git/objects/
- 137_supp/program/.git/objects/0c/
- 137_supp/program/.git/objects/0c/1df068fd2c2c1f8856a16c3ce4f9e599b5df6a
- 137_supp/program/.git/objects/66/
- 137_supp/program/.git/objects/66/5ed9b9d48378b4f56a992342c9cb0f3c7a67ba
- 137_supp/program/.git/objects/66/6b0f3cfccc91458963b3632b9bc29a617a9e41
- 137_supp/program/.git/objects/9e/
- 137_supp/program/.git/objects/9e/1590b003711c60ba21c9b8a2db8236ff058195
- 137_supp/program/.git/objects/32/
- 137_supp/program/.git/objects/32/cc38fc8254a922bc73982114e9bfd6908563e4
- 137_supp/program/.git/objects/3c/
- 137_supp/program/.git/objects/3c/eaaa9c09ec3e3a4cd80a828c9122914180317a
- 137_supp/program/.git/objects/56/
- 137_supp/program/.git/objects/56/cc7e75c0d24f32c06e57f3dee9563134acab8b
- 137_supp/program/.git/objects/51/
- 137_supp/program/.git/objects/51/d5ce3a5c9bc9ce021923caded3356916612cf3
- 137_supp/program/.git/objects/94/
- 137_supp/program/.git/objects/94/a25f7f4cb416c083d265558da75d457237d671
- 137_supp/program/.git/objects/9d/
- 137_supp/program/.git/objects/9d/7d60aacfe11d709778e6377deb49ca3948ef56
- 137_supp/program/.git/objects/02/
- 137_supp/program/.git/objects/02/8c21f589e4134eab25857fc95fae9e2b5edcb0
- 137_supp/program/.git/objects/b5/
- 137_supp/program/.git/objects/b5/06edb40f8d4e740c76cbeb4f405bf5efa572de
- 137_supp/program/.git/objects/d0/
- 137_supp/program/.git/objects/d0/6558be0d6088805a3c90552060f5ae2fbcc67e
- 137_supp/program/.git/objects/b3/
- 137_supp/program/.git/objects/b3/299a53941a71414a48d9cda1dca983b22b5310
- 137_supp/program/.git/objects/df/
- 137_supp/program/.git/objects/df/bedc45965f4079899145311b6e53fc8bdb702e
- 137_supp/program/.git/objects/da/
- 137_supp/program/.git/objects/da/5f89f78b0fe8d55789ffad70011f368b193bd4
- 137_supp/program/.git/objects/da/dab3127273d148af1f0939242dd4cb2dd5645e
- 137_supp/program/.git/objects/a2/
- 137_supp/program/.git/objects/a2/77d0a3d62b6da5f02a86902f200eb63ab048fb
- 137_supp/program/.git/objects/a2/e120dcc86d18fdcb6ccfbe56c5d0b0dcd7c04a
- 137_supp/program/.git/objects/bc/
- 137_supp/program/.git/objects/bc/93dacc2710be1d47601dc6444955649539e073
- 137_supp/program/.git/objects/d8/
- 137_supp/program/.git/objects/d8/ec86d7b4cc785ac506b37b44fd96b1409cb871
- 137_supp/program/.git/objects/ab/
- 137_supp/program/.git/objects/ab/75f84b6d059f83cccb8e692895e157a0aaa109
- 137_supp/program/.git/objects/f4/
- 137_supp/program/.git/objects/f4/add239a3004548c68414a27abbfee9bb1a6ee7
- 137_supp/program/.git/objects/f3/
- 137_supp/program/.git/objects/f3/74a576bd2e873ab500f0a76f6965ebf1faec39
- 137_supp/program/.git/objects/c7/
- 137_supp/program/.git/objects/c7/cc3270250c4e8342b28ba21ec13cdf4552d46e
- 137_supp/program/.git/objects/ee/
- 137_supp/program/.git/objects/ee/74dbf1b3e5b8f158b835957ebf0affd7e8de96
- 137_supp/program/.git/objects/fc/
- 137_supp/program/.git/objects/fc/770af667dae0e3d77bc61b9e4236fa8b76f062
- 137_supp/program/.git/objects/fb/
- 137_supp/program/.git/objects/fb/4ff5ddd6dff402b21433477bac275d1af00f26
- 137_supp/program/.git/objects/c6/
- 137_supp/program/.git/objects/c6/729191e3aabbf615766889159f316c1b22992c
- 137_supp/program/.git/objects/ec/
- 137_supp/program/.git/objects/ec/48e0c2e83d6c5a327f27f58da50582e8da3712
- 137_supp/program/.git/objects/18/
- 137_supp/program/.git/objects/18/b252d19087fcd9a72c57c213ac82e3d338a3a1
- 137_supp/program/.git/objects/18/ad6191ac5518150f1ef28861b00b6b3d237a32
- 137_supp/program/.git/objects/pack/
- 137_supp/program/.git/objects/7c/
- 137_supp/program/.git/objects/7c/073ffc70e65fc209f19e39a7f2b9a83acfead4
- 137_supp/program/.git/objects/89/
- 137_supp/program/.git/objects/89/5bcf1b62e58400065a100e583d8aa9942ce847
- 137_supp/program/.git/objects/80/
- 137_supp/program/.git/objects/80/e4ab335eafd738a788e7107c928cb7795a42e3
- 137_supp/program/.git/objects/74/
- 137_supp/program/.git/objects/74/ff53f0b16127645e0ad8036db73ec9d44870b8
- 137_supp/program/.git/objects/74/ef34a17938cc2e6d6259eb770746b3cf4cfa27
- 137_supp/program/.git/objects/74/08fd163f0616cee84b43559267800b964429d0
- 137_supp/program/.git/objects/8a/
- 137_supp/program/.git/objects/8a/e26e63ebddd163a68e7096f753e6f80e46d960
- 137_supp/program/.git/objects/26/
- 137_supp/program/.git/objects/26/4dbc090467dd54e242c0e9e27bb9eb6e6379ad
- 137_supp/program/.git/objects/4d/
- 137_supp/program/.git/objects/4d/13472446cfa10a7d6daefafea23458f617418f
- 137_supp/program/.git/objects/4d/0f9c9c2e99523531e1cb49aa1981afdef1de80
- 137_supp/program/.git/objects/75/
- 137_supp/program/.git/objects/75/9745b1537faa64d6ea5e64ec2874b9386ae801
- 137_supp/program/.git/objects/2a/
- 137_supp/program/.git/objects/2a/e2cff7e720fffa1fbc6f2ed7c44af30928d52f
- 137_supp/program/.git/objects/2a/aad5c6ff52d79de3b387bcfa065b7519d1b4e6
- 137_supp/program/.git/objects/2f/
- 137_supp/program/.git/objects/2f/e0ee38e3513e3cec0e3eb64e6a7a119e56facf
- 137_supp/program/.git/objects/9a/
- 137_supp/program/.git/objects/9a/ea7041f2eae604e4cb82f888c7cb9cce6a4f29
- 137_supp/program/.git/objects/09/
- 137_supp/program/.git/objects/09/3f325f8af5846c266ba2f22b5d819c7d28379a
- 137_supp/program/.git/objects/info/
- 137_supp/program/.git/objects/30/
- 137_supp/program/.git/objects/30/326bfa39408053f2ac6191c1156e1ddd35fefe
- 137_supp/program/.git/objects/55/
- 137_supp/program/.git/objects/55/47755c4a07a0c15e6906906fac9ad47de685d8
- 137_supp/program/.git/objects/63/
- 137_supp/program/.git/objects/63/fb19a23bbdd609133671f5e84dc93a8bdde0f2
- 137_supp/program/.git/objects/0a/
- 137_supp/program/.git/objects/0a/14984b0bcd6d02c02981e2fcba03d8457e13f0
- 137_supp/program/.git/objects/d4/
- 137_supp/program/.git/objects/d4/7682acf37225653249c592578f69118c1659d5
- 137_supp/program/.git/objects/a0/
- 137_supp/program/.git/objects/a0/e4e72f02d544fac978ee876d813275a50f0bc5
- 137_supp/program/.git/objects/a7/
- 137_supp/program/.git/objects/a7/89744149564b085f4e61a68f4edb56cfc2862d
- 137_supp/program/.git/objects/b8/
- 137_supp/program/.git/objects/b8/79c43f8862b83c0ae39f74727d867b03d5cfe9
- 137_supp/program/.git/objects/dd/
- 137_supp/program/.git/objects/dd/47854c029c1f7c5b3d14678d19d6ea46a11db3
- 137_supp/program/.git/objects/b6/
- 137_supp/program/.git/objects/b6/43d3114053a3089310d28e2b9d531f70ee5c5d
- 137_supp/program/.git/objects/a9/
- 137_supp/program/.git/objects/a9/a8ff11fea8ff20bd11708ce0693064ff6ef01a
- 137_supp/program/.git/objects/d5/
- 137_supp/program/.git/objects/d5/a5bb483dd78c0c9c44e6fe3814afc814f2e4eb
- 137_supp/program/.git/objects/d2/
- 137_supp/program/.git/objects/d2/e1bdd6d57b5a47fdc742bac453184b0e01c8b6
- 137_supp/program/.git/objects/d2/6bf07808593b2bfc880c202f2ebcc42bbd8573
- 137_supp/program/.git/objects/db/
- 137_supp/program/.git/objects/db/8a21ea88dc7a4562ff9966c33ead77d021fbc7
- 137_supp/program/.git/objects/de/
- 137_supp/program/.git/objects/de/e43eb7150ee64f9a9222ab16fa87d36c4cb0e2
- 137_supp/program/.git/objects/b0/
- 137_supp/program/.git/objects/b0/933090b9f9b4c98ec8ca383b019cfb45d8dcb3
- 137_supp/program/.git/objects/b9/
- 137_supp/program/.git/objects/b9/e115db2f1f3240c01b90728a1769d590cf27d4
- 137_supp/program/.git/objects/b9/102d0dc598bf68881ce70353cf9fecc8705453
- 137_supp/program/.git/objects/ef/
- 137_supp/program/.git/objects/ef/fac53b287fd50576be119f54b41aece5f2bf80
- 137_supp/program/.git/objects/cd/
- 137_supp/program/.git/objects/cd/6d0cd475a50ab39dd6a0511daadb492ee45b23
- 137_supp/program/.git/objects/ff/
- 137_supp/program/.git/objects/ff/218a8d073c086b3ee5e034193da1e9e2ad48bb
- 137_supp/program/.git/objects/ff/db79a6c654c736e84f0085adcf328b9441f79c
- 137_supp/program/.git/objects/ff/aaf5f4d5aea5b54b2eeb4f5762c2e12df9e127
- 137_supp/program/.git/objects/ff/c1d0b7593cfb45a4a30c836dcb61bde1dc12e5
- 137_supp/program/.git/objects/ff/b174b2c2642bb731d9a20c78479281b4edd6b9
- 137_supp/program/.git/objects/e9/
- 137_supp/program/.git/objects/e9/51faced0476849aec315041858115d98552eea
- 137_supp/program/.git/objects/48/
- 137_supp/program/.git/objects/48/bd113a65ec3e49e6df6751ff6adf19ef1651ec
- 137_supp/program/.git/objects/70/
- 137_supp/program/.git/objects/70/7ccac2bbe7a939a42b0aeabee1971ecc6f9115
- 137_supp/program/.git/objects/4a/
- 137_supp/program/.git/objects/4a/f909a4942a2a5d1810d7c7f917d232522d69da
- 137_supp/program/.git/objects/24/
- 137_supp/program/.git/objects/24/4743d76b3f853d23c35371379e56bffdbf461d
- 137_supp/program/.git/objects/15/
- 137_supp/program/.git/objects/15/a15b218a29e09c9190992732698d646e4d659a
- 137_supp/program/.git/objects/8c/
- 137_supp/program/.git/objects/8c/4290883485f9a52bf5e450ae2d500a2d22e617
- 137_supp/program/.git/objects/85/
- 137_supp/program/.git/objects/85/9cfda92d0b7968e75bf81bee03fa351c63a78f
- 137_supp/program/.git/objects/71/
- 137_supp/program/.git/objects/71/f5ff7491c8adc14863f731dc3da7f5ed771285
- 137_supp/program/.git/objects/71/03bb95bdd32bbe9880a995699ffe507dddc590
- 137_supp/program/.git/objects/2e/
- 137_supp/program/.git/objects/2e/13ea7f693a1aefbf6673a5313f2b1ea0ce85d5
- 137_supp/program/.git/objects/2e/b726ca6875c3a5164c1b95b3080a96c8a63488
- 137_supp/program/.git/objects/8b/
- 137_supp/program/.git/objects/8b/05317a99f1642dfe6da9d4b0586c4f778e41ef
- 137_supp/program/.git/objects/13/
- 137_supp/program/.git/objects/13/b233b6d1a989460430a33a848d73e936f6881e
- 137_supp/program/.git/HEAD
- 137_supp/program/.git/logs/
- 137_supp/program/.git/logs/HEAD
- 137_supp/program/.git/logs/refs/
- 137_supp/program/.git/logs/refs/heads/
- 137_supp/program/.git/logs/refs/heads/master
- 137_supp/program/.git/logs/refs/remotes/
- 137_supp/program/.git/logs/refs/remotes/origin/
- 137_supp/program/.git/logs/refs/remotes/origin/HEAD
- 137_supp/program/.git/logs/refs/remotes/origin/master
- 137_supp/program/.git/refs/
- 137_supp/program/.git/refs/heads/
- 137_supp/program/.git/refs/heads/master
- 137_supp/program/.git/refs/tags/
- 137_supp/program/.git/refs/remotes/
- 137_supp/program/.git/refs/remotes/origin/
- 137_supp/program/.git/refs/remotes/origin/HEAD
- 137_supp/program/.git/refs/remotes/origin/master
- 137_supp/program/.git/index
- 137_supp/program/.git/packed-refs
- 137_supp/program/.git/COMMIT_EDITMSG
- 137_supp/program/.git/FETCH_HEAD
- 137_supp/program/.git/sourcetreeconfig
- __MACOSX/137_supp/program/.git/
- __MACOSX/137_supp/program/.git/._sourcetreeconfig
- 137_supp/program/main.py
- 137_supp/program/.idea/
- 137_supp/program/.idea/stopping_criterion_of_active_learning.iml
- 137_supp/program/.idea/encodings.xml
- 137_supp/program/.idea/libraries/
- 137_supp/program/.idea/libraries/R_User_Library.xml
- 137_supp/program/.idea/vcs.xml
- 137_supp/program/.idea/workspace.xml
- 137_supp/program/.idea/modules.xml
[truncated: 3 more entries]
