# Supplementary material
Source: ML conference proceedings conference paper supplement (https://proceedings.mlr.press/v108/ishibashi20a.html)
Supplement: Supplementary file 2 [file ishibashi20a-supp.zip › 137_supp/program/dataset/airfoil/airfoil_self_noise.txt]

800	0	0.3048	71.3	0.00266337	126.201
1000	0	0.3048	71.3	0.00266337	125.201
1250	0	0.3048	71.3	0.00266337	125.951
1600	0	0.3048	71.3	0.00266337	127.591
2000	0	0.3048	71.3	0.00266337	127.461
2500	0	0.3048	71.3	0.00266337	125.571
3150	0	0.3048	71.3	0.00266337	125.201
4000	0	0.3048	71.3	0.00266337	123.061
5000	0	0.3048	71.3	0.00266337	121.301
6300	0	0.3048	71.3	0.00266337	119.541
8000	0	0.3048	71.3	0.00266337	117.151
10000	0	0.3048	71.3	0.00266337	115.391
12500	0	0.3048	71.3	0.00266337	112.241
16000	0	0.3048	71.3	0.00266337	108.721
500	0	0.3048	55.5	0.00283081	126.416
630	0	0.3048	55.5	0.00283081	127.696
800	0	0.3048	55.5	0.00283081	128.086
1000	0	0.3048	55.5	0.00283081	126.966
1250	0	0.3048	55.5	0.00283081	126.086
1600	0	0.3048	55.5	0.00283081	126.986
2000	0	0.3048	55.5	0.00283081	126.616
2500	0	0.3048	55.5	0.00283081	124.106
3150	0	0.3048	55.5	0.00283081	123.236
4000	0	0.3048	55.5	0.00283081	121.106
5000	0	0.3048	55.5	0.00283081	119.606
6300	0	0.3048	55.5	0.00283081	117.976
8000	0	0.3048	55.5	0.00283081	116.476
10000	0	0.3048	55.5	0.00283081	113.076
12500	0	0.3048	55.5	0.00283081	111.076
200	0	0.3048	39.6	0.00310138	118.129
250	0	0.3048	39.6	0.00310138	119.319
315	0	0.3048	39.6	0.00310138	122.779
400	0	0.3048	39.6	0.00310138	124.809
500	0	0.3048	39.6	0.00310138	126.959
630	0	0.3048	39.6	0.00310138	128.629
800	0	0.3048	39.6	0.00310138	129.099
1000	0	0.3048	39.6	0.00310138	127.899
1250	0	0.3048	39.6	0.00310138	125.499
1600	0	0.3048	39.6	0.00310138	124.049
2000	0	0.3048	39.6	0.00310138	123.689
2500	0	0.3048	39.6	0.00310138	121.399
3150	0	0.3048	39.6	0.00310138	120.319
4000	0	0.3048	39.6	0.00310138	119.229
5000	0	0.3048	39.6	0.00310138	117.789
6300	0	0.3048	39.6	0.00310138	116.229
8000	0	0.3048	39.6	0.00310138	114.779
10000	0	0.3048	39.6	0.00310138	112.139
12500	0	0.3048	39.6	0.00310138	109.619
200	0	0.3048	31.7	0.00331266	117.195
250	0	0.3048	31.7	0.00331266	118.595
315	0	0.3048	31.7	0.00331266	122.765
400	0	0.3048	31.7	0.00331266	125.045
500	0	0.3048	31.7	0.00331266	127.315
630	0	0.3048	31.7	0.00331266	129.095
800	0	0.3048	31.7	0.00331266	129.235
1000	0	0.3048	31.7	0.00331266	127.365
1250	0	0.3048	31.7	0.00331266	124.355
1600	0	0.3048	31.7	0.00331266	122.365
2000	0	0.3048	31.7	0.00331266	122.375
2500	0	0.3048	31.7	0.00331266	120.755
3150	0	0.3048	31.7	0.00331266	119.135
4000	0	0.3048	31.7	0.00331266	118.145
5000	0	0.3048	31.7	0.00331266	115.645
6300	0	0.3048	31.7	0.00331266	113.775
8000	0	0.3048	31.7	0.00331266	110.515
10000	0	0.3048	31.7	0.00331266	108.265
800	1.5	0.3048	71.3	0.00336729	127.122
1000	1.5	0.3048	71.3	0.00336729	125.992
1250	1.5	0.3048	71.3	0.00336729	125.872
1600	1.5	0.3048	71.3	0.00336729	126.632
2000	1.5	0.3048	71.3	0.00336729	126.642
2500	1.5	0.3048	71.3	0.00336729	124.512
3150	1.5	0.3048	71.3	0.00336729	123.392
4000	1.5	0.3048	71.3	0.00336729	121.762
5000	1.5	0.3048	71.3	0.00336729	119.632
6300	1.5	0.3048	71.3	0.00336729	118.122
8000	1.5	0.3048	71.3	0.00336729	115.372
10000	1.5	0.3048	71.3	0.00336729	113.492
12500	1.5	0.3048	71.3	0.00336729	109.222
16000	1.5	0.3048	71.3	0.00336729	106.582
315	1.5	0.3048	39.6	0.00392107	121.851
400	1.5	0.3048	39.6	0.00392107	124.001
500	1.5	0.3048	39.6	0.00392107	126.661
630	1.5	0.3048	39.6	0.00392107	128.311
800	1.5	0.3048	39.6	0.00392107	128.831
1000	1.5	0.3048	39.6	0.00392107	127.581
1250	1.5	0.3048	39.6	0.00392107	125.211
1600	1.5	0.3048	39.6	0.00392107	122.211
2000	1.5	0.3048	39.6	0.00392107	122.101
2500	1.5	0.3048	39.6	0.00392107	120.981
3150	1.5	0.3048	39.6	0.00392107	119.111
4000	1.5	0.3048	39.6	0.00392107	117.741
5000	1.5	0.3048	39.6	0.00392107	116.241
6300	1.5	0.3048	39.6	0.00392107	114.751
8000	1.5	0.3048	39.6	0.00392107	112.251
10000	1.5	0.3048	39.6	0.00392107	108.991
12500	1.5	0.3048	39.6	0.00392107	106.111
400	3	0.3048	71.3	0.00425727	127.564
500	3	0.3048	71.3	0.00425727	128.454
630	3	0.3048	71.3	0.00425727	129.354
800	3	0.3048	71.3	0.00425727	129.494
1000	3	0.3048	71.3	0.00425727	129.004
1250	3	0.3048	71.3	0.00425727	127.634
1600	3	0.3048	71.3	0.00425727	126.514
2000	3	0.3048	71.3	0.00425727	125.524
2500	3	0.3048	71.3	0.00425727	124.024
3150	3	0.3048	71.3	0.00425727	121.514
4000	3	0.3048	71.3	0.00425727	120.264
5000	3	0.3048	71.3	0.00425727	118.134
6300	3	0.3048	71.3	0.00425727	116.134
8000	3	0.3048	71.3	0.00425727	114.634
10000	3	0.3048	71.3	0.00425727	110.224
400	3	0.3048	55.5	0.00452492	126.159
500	3	0.3048	55.5	0.00452492	128.179
630	3	0.3048	55.5	0.00452492	129.569
800	3	0.3048	55.5	0.00452492	129.949
1000	3	0.3048	55.5	0.00452492	129.329
1250	3	0.3048	55.5	0.00452492	127.329
1600	3	0.3048	55.5	0.00452492	124.439
2000	3	0.3048	55.5	0.00452492	123.069
2500	3	0.3048	55.5	0.00452492	122.439
3150	3	0.3048	55.5	0.00452492	120.189
4000	3	0.3048	55.5	0.00452492	118.689
5000	3	0.3048	55.5	0.00452492	117.309
6300	3	0.3048	55.5	0.00452492	115.679
8000	3	0.3048	55.5	0.00452492	113.799
10000	3	0.3048	55.5	0.00452492	112.169
315	3	0.3048	39.6	0.00495741	123.312
400	3	0.3048	39.6	0.00495741	125.472
500	3	0.3048	39.6	0.00495741	127.632
630	3	0.3048	39.6	0.00495741	129.292
800	3	0.3048	39.6	0.00495741	129.552
1000	3	0.3048	39.6	0.00495741	128.312
1250	3	0.3048	39.6	0.00495741	125.802
1600	3	0.3048	39.6	0.00495741	122.782
2000	3	0.3048	39.6	0.00495741	120.532
2500	3	0.3048	39.6	0.00495741	120.162
3150	3	0.3048	39.6	0.00495741	118.922
4000	3	0.3048	39.6	0.00495741	116.792
5000	3	0.3048	39.6	0.00495741	115.792
6300	3	0.3048	39.6	0.00495741	114.042
8000	3	0.3048	39.6	0.00495741	110.652
315	3	0.3048	31.7	0.00529514	123.118
400	3	0.3048	31.7	0.00529514	125.398
500	3	0.3048	31.7	0.00529514	127.548
630	3	0.3048	31.7	0.00529514	128.698
800	3	0.3048	31.7	0.00529514	128.708
1000	3	0.3048	31.7	0.00529514	126.838
1250	3	0.3048	31.7	0.00529514	124.838
1600	3	0.3048	31.7	0.00529514	122.088
2000	3	0.3048	31.7	0.00529514	120.088
2500	3	0.3048	31.7	0.00529514	119.598
3150	3	0.3048	31.7	0.00529514	118.108
4000	3	0.3048	31.7	0.00529514	115.608
5000	3	0.3048	31.7	0.00529514	113.858
6300	3	0.3048	31.7	0.00529514	109.718
250	4	0.3048	71.3	0.00497773	126.395
315	4	0.3048	71.3	0.00497773	128.175
400	4	0.3048	71.3	0.00497773	129.575
500	4	0.3048	71.3	0.00497773	130.715
630	4	0.3048	71.3	0.00497773	131.615
800	4	0.3048	71.3	0.00497773	131.755
1000	4	0.3048	71.3	0.00497773	131.015
1250	4	0.3048	71.3	0.00497773	129.395
1600	4	0.3048	71.3	0.00497773	126.645
2000	4	0.3048	71.3	0.00497773	124.395
2500	4	0.3048	71.3	0.00497773	123.775
3150	4	0.3048	71.3	0.00497773	121.775
4000	4	0.3048	71.3	0.00497773	119.535
5000	4	0.3048	71.3	0.00497773	117.785
6300	4	0.3048	71.3	0.00497773	116.165
8000	4	0.3048	71.3	0.00497773	113.665
10000	4	0.3048	71.3	0.00497773	110.905
12500	4	0.3048	71.3	0.00497773	107.405
250	4	0.3048	39.6	0.00579636	123.543
315	4	0.3048	39.6	0.00579636	126.843
400	4	0.3048	39.6	0.00579636	128.633
500	4	0.3048	39.6	0.00579636	130.173
630	4	0.3048	39.6	0.00579636	131.073
800	4	0.3048	39.6	0.00579636	130.723
1000	4	0.3048	39.6	0.00579636	128.723
1250	4	0.3048	39.6	0.00579636	126.343
1600	4	0.3048	39.6	0.00579636	123.213
2000	4	0.3048	39.6	0.00579636	120.963
2500	4	0.3048	39.6	0.00579636	120.233
3150	4	0.3048	39.6	0.00579636	118.743
4000	4	0.3048	39.6	0.00579636	115.863
5000	4	0.3048	39.6	0.00579636	113.733
1250	0	0.2286	71.3	0.00214345	128.144
1600	0	0.2286	71.3	0.00214345	129.134
2000	0	0.2286	71.3	0.00214345	128.244
2500	0	0.2286	71.3	0.00214345	128.354
3150	0	0.2286	71.3	0.00214345	127.834
4000	0	0.2286	71.3	0.00214345	125.824
5000	0	0.2286	71.3	0.00214345	124.304
6300	0	0.2286	71.3	0.00214345	122.044
8000	0	0.2286	71.3	0.00214345	118.024
10000	0	0.2286	71.3	0.00214345	118.134
12500	0	0.2286	71.3	0.00214345	117.624
16000	0	0.2286	71.3	0.00214345	114.984
20000	0	0.2286	71.3	0.00214345	114.474
315	0	0.2286	55.5	0.00229336	119.540
400	0	0.2286	55.5	0.00229336	121.660
500	0	0.2286	55.5	0.00229336	123.780
630	0	0.2286	55.5	0.00229336	126.160
800	0	0.2286	55.5	0.00229336	127.530
1000	0	0.2286	55.5	0.00229336	128.290
1250	0	0.2286	55.5	0.00229336	127.910
1600	0	0.2286	55.5	0.00229336	126.790
2000	0	0.2286	55.5	0.00229336	126.540
2500	0	0.2286	55.5	0.00229336	126.540
3150	0	0.2286	55.5	0.00229336	125.160
4000	0	0.2286	55.5	0.00229336	123.410
5000	0	0.2286	55.5	0.00229336	122.410
6300	0	0.2286	55.5	0.00229336	118.410
315	0	0.2286	39.6	0.00253511	121.055
400	0	0.2286	39.6	0.00253511	123.565
500	0	0.2286	39.6	0.00253511	126.195
630	0	0.2286	39.6	0.00253511	128.705
800	0	0.2286	39.6	0.00253511	130.205
1000	0	0.2286	39.6	0.00253511	130.435
1250	0	0.2286	39.6	0.00253511	129.395
1600	0	0.2286	39.6	0.00253511	127.095
2000	0	0.2286	39.6	0.00253511	125.305
2500	0	0.2286	39.6	0.00253511	125.025
3150	0	0.2286	39.6	0.00253511	124.625
4000	0	0.2286	39.6	0.00253511	123.465
5000	0	0.2286	39.6	0.00253511	122.175
6300	0	0.2286	39.6	0.00253511	117.465
315	0	0.2286	31.7	0.0027238	120.595
400	0	0.2286	31.7	0.0027238	123.635
500	0	0.2286	31.7	0.0027238	126.675
630	0	0.2286	31.7	0.0027238	129.465
800	0	0.2286	31.7	0.0027238	130.725
1000	0	0.2286	31.7	0.0027238	130.595
1250	0	0.2286	31.7	0.0027238	128.805
1600	0	0.2286	31.7	0.0027238	125.625
2000	0	0.2286	31.7	0.0027238	123.455
2500	0	0.2286	31.7	0.0027238	123.445
3150	0	0.2286	31.7	0.0027238	123.445
4000	0	0.2286	31.7	0.0027238	122.035
5000	0	0.2286	31.7	0.0027238	120.505
6300	0	0.2286	31.7	0.0027238	116.815
400	2	0.2286	71.3	0.00293031	125.116
500	2	0.2286	71.3	0.00293031	126.486
630	2	0.2286	71.3	0.00293031	127.356
800	2	0.2286	71.3	0.00293031	128.216
1000	2	0.2286	71.3	0.00293031	128.956
1250	2	0.2286	71.3	0.00293031	128.816
1600	2	0.2286	71.3	0.00293031	127.796
2000	2	0.2286	71.3	0.00293031	126.896
2500	2	0.2286	71.3	0.00293031	127.006
3150	2	0.2286	71.3	0.00293031	126.116
4000	2	0.2286	71.3	0.00293031	124.086
5000	2	0.2286	71.3	0.00293031	122.816
6300	2	0.2286	71.3	0.00293031	120.786
8000	2	0.2286	71.3	0.00293031	115.996
10000	2	0.2286	71.3	0.00293031	113.086
400	2	0.2286	55.5	0.00313525	122.292
500	2	0.2286	55.5	0.00313525	124.692
630	2	0.2286	55.5	0.00313525	126.842
800	2	0.2286	55.5	0.00313525	128.492
1000	2	0.2286	55.5	0.00313525	129.002
1250	2	0.2286	55.5	0.00313525	128.762
1600	2	0.2286	55.5	0.00313525	126.752
2000	2	0.2286	55.5	0.00313525	124.612
2500	2	0.2286	55.5	0.00313525	123.862
3150	2	0.2286	55.5	0.00313525	123.742
4000	2	0.2286	55.5	0.00313525	122.232
5000	2	0.2286	55.5	0.00313525	120.472
6300	2	0.2286	55.5	0.00313525	118.712
315	2	0.2286	39.6	0.00346574	120.137
400	2	0.2286	39.6	0.00346574	122.147
500	2	0.2286	39.6	0.00346574	125.157
630	2	0.2286	39.6	0.00346574	127.417
800	2	0.2286	39.6	0.00346574	129.037
1000	2	0.2286	39.6	0.00346574	129.147
1250	2	0.2286	39.6	0.00346574	128.257
1600	2	0.2286	39.6	0.00346574	125.837
2000	2	0.2286	39.6	0.00346574	122.797
2500	2	0.2286	39.6	0.00346574	121.397
3150	2	0.2286	39.6	0.00346574	121.627
4000	2	0.2286	39.6	0.00346574	120.227
5000	2	0.2286	39.6	0.00346574	118.827
6300	2	0.2286	39.6	0.00346574	116.417
315	2	0.2286	31.7	0.00372371	120.147
400	2	0.2286	31.7	0.00372371	123.417
500	2	0.2286	31.7	0.00372371	126.677
630	2	0.2286	31.7	0.00372371	129.057
800	2	0.2286	31.7	0.00372371	130.307
1000	2	0.2286	31.7	0.00372371	130.307
1250	2	0.2286	31.7	0.00372371	128.677
1600	2	0.2286	31.7	0.00372371	125.797
2000	2	0.2286	31.7	0.00372371	123.037
2500	2	0.2286	31.7	0.00372371	121.407
3150	2	0.2286	31.7	0.00372371	121.527
4000	2	0.2286	31.7	0.00372371	120.527
5000	2	0.2286	31.7	0.00372371	118.267
6300	2	0.2286	31.7	0.00372371	115.137
500	4	0.2286	71.3	0.00400603	126.758
630	4	0.2286	71.3	0.00400603	129.038
800	4	0.2286	71.3	0.00400603	130.688
1000	4	0.2286	71.3	0.00400603	131.708
1250	4	0.2286	71.3	0.00400603	131.718
1600	4	0.2286	71.3	0.00400603	129.468
2000	4	0.2286	71.3	0.00400603	126.218
2500	4	0.2286	71.3	0.00400603	124.338
3150	4	0.2286	71.3	0.00400603	124.108
4000	4	0.2286	71.3	0.00400603	121.728
5000	4	0.2286	71.3	0.00400603	121.118
6300	4	0.2286	71.3	0.00400603	118.618
8000	4	0.2286	71.3	0.00400603	112.848
10000	4	0.2286	71.3	0.00400603	113.108
12500	4	0.2286	71.3	0.00400603	114.258
16000	4	0.2286	71.3	0.00400603	112.768
20000	4	0.2286	71.3	0.00400603	109.638
400	4	0.2286	55.5	0.0042862	123.274
500	4	0.2286	55.5	0.0042862	127.314
630	4	0.2286	55.5	0.0042862	129.964
800	4	0.2286	55.5	0.0042862	131.864
1000	4	0.2286	55.5	0.0042862	132.134
1250	4	0.2286	55.5	0.0042862	131.264
1600	4	0.2286	55.5	0.0042862	128.264
2000	4	0.2286	55.5	0.0042862	124.254
2500	4	0.2286	55.5	0.0042862	122.384
3150	4	0.2286	55.5	0.0042862	122.394
4000	4	0.2286	55.5	0.0042862	120.654
5000	4	0.2286	55.5	0.0042862	120.034
6300	4	0.2286	55.5	0.0042862	117.154
8000	4	0.2286	55.5	0.0042862	112.524
315	4	0.2286	39.6	0.00473801	122.229
400	4	0.2286	39.6	0.00473801	123.879
500	4	0.2286	39.6	0.00473801	127.039
630	4	0.2286	39.6	0.00473801	129.579
800	4	0.2286	39.6	0.00473801	130.469
1000	4	0.2286	39.6	0.00473801	129.969
1250	4	0.2286	39.6	0.00473801	128.339
1600	4	0.2286	39.6	0.00473801	125.319
2000	4	0.2286	39.6	0.00473801	121.659
2500	4	0.2286	39.6	0.00473801	119.649
3150	4	0.2286	39.6	0.00473801	120.419
4000	4	0.2286	39.6	0.00473801	119.159
5000	4	0.2286	39.6	0.00473801	117.649
6300	4	0.2286	39.6	0.00473801	114.249
8000	4	0.2286	39.6	0.00473801	113.129
250	4	0.2286	31.7	0.00509068	120.189
315	4	0.2286	31.7	0.00509068	123.609
400	4	0.2286	31.7	0.00509068	126.149
500	4	0.2286	31.7	0.00509068	128.939
630	4	0.2286	31.7	0.00509068	130.349
800	4	0.2286	31.7	0.00509068	130.869
1000	4	0.2286	31.7	0.00509068	129.869
1250	4	0.2286	31.7	0.00509068	128.119
1600	4	0.2286	31.7	0.00509068	125.229
2000	4	0.2286	31.7	0.00509068	122.089
2500	4	0.2286	31.7	0.00509068	120.209
3150	4	0.2286	31.7	0.00509068	120.229
4000	4	0.2286	31.7	0.00509068	118.859
5000	4	0.2286	31.7	0.00509068	115.969
6300	4	0.2286	31.7	0.00509068	112.699
400	5.3	0.2286	71.3	0.0051942	127.700
500	5.3	0.2286	71.3	0.0051942	129.880
630	5.3	0.2286	71.3	0.0051942	131.800
800	5.3	0.2286	71.3	0.0051942	133.480
1000	5.3	0.2286	71.3	0.0051942	134.000
1250	5.3	0.2286	71.3	0.0051942	133.380
1600	5.3	0.2286	71.3	0.0051942	130.460
2000	5.3	0.2286	71.3	0.0051942	125.890
2500	5.3	0.2286	71.3	0.0051942	123.740
3150	5.3	0.2286	71.3	0.0051942	123.120
4000	5.3	0.2286	71.3	0.0051942	120.330
5000	5.3	0.2286	71.3	0.0051942	118.050
6300	5.3	0.2286	71.3	0.0051942	116.920
8000	5.3	0.2286	71.3	0.0051942	114.900
10000	5.3	0.2286	71.3	0.0051942	111.350
250	5.3	0.2286	39.6	0.00614329	127.011
315	5.3	0.2286	39.6	0.00614329	129.691
400	5.3	0.2286	39.6	0.00614329	131.221
500	5.3	0.2286	39.6	0.00614329	132.251
630	5.3	0.2286	39.6	0.00614329	132.011
800	5.3	0.2286	39.6	0.00614329	129.491
1000	5.3	0.2286	39.6	0.00614329	125.581
1250	5.3	0.2286	39.6	0.00614329	125.721
1600	5.3	0.2286	39.6	0.00614329	123.081
2000	5.3	0.2286	39.6	0.00614329	117.911
2500	5.3	0.2286	39.6	0.00614329	116.151
3150	5.3	0.2286	39.6	0.00614329	118.441
4000	5.3	0.2286	39.6	0.00614329	115.801
5000	5.3	0.2286	39.6	0.00614329	115.311
6300	5.3	0.2286	39.6	0.00614329	112.541
200	7.3	0.2286	71.3	0.0104404	138.758
250	7.3	0.2286	71.3	0.0104404	139.918
315	7.3	0.2286	71.3	0.0104404	139.808
400	7.3	0.2286	71.3	0.0104404	139.438
500	7.3	0.2286	71.3	0.0104404	136.798
630	7.3	0.2286	71.3	0.0104404	133.768
800	7.3	0.2286	71.3	0.0104404	130.748
1000	7.3	0.2286	71.3	0.0104404	126.838
1250	7.3	0.2286	71.3	0.0104404	127.358
1600	7.3	0.2286	71.3	0.0104404	125.728
2000	7.3	0.2286	71.3	0.0104404	122.708
2500	7.3	0.2286	71.3	0.0104404	122.088
3150	7.3	0.2286	71.3	0.0104404	120.458
4000	7.3	0.2286	71.3	0.0104404	119.208
5000	7.3	0.2286	71.3	0.0104404	115.298
6300	7.3	0.2286	71.3	0.0104404	115.818
200	7.3	0.2286	55.5	0.0111706	135.234
250	7.3	0.2286	55.5	0.0111706	136.384
315	7.3	0.2286	55.5	0.0111706	136.284
400	7.3	0.2286	55.5	0.0111706	135.924
500	7.3	0.2286	55.5	0.0111706	133.174
630	7.3	0.2286	55.5	0.0111706	130.934
800	7.3	0.2286	55.5	0.0111706	128.444
1000	7.3	0.2286	55.5	0.0111706	125.194
1250	7.3	0.2286	55.5	0.0111706	125.724
1600	7.3	0.2286	55.5	0.0111706	123.354
2000	7.3	0.2286	55.5	0.0111706	120.354
2500	7.3	0.2286	55.5	0.0111706	118.994
3150	7.3	0.2286	55.5	0.0111706	117.134
4000	7.3	0.2286	55.5	0.0111706	117.284
5000	7.3	0.2286	55.5	0.0111706	113.144
6300	7.3	0.2286	55.5	0.0111706	111.534
200	7.3	0.2286	39.6	0.0123481	130.989
250	7.3	0.2286	39.6	0.0123481	131.889
315	7.3	0.2286	39.6	0.0123481	132.149
400	7.3	0.2286	39.6	0.0123481	132.039
500	7.3	0.2286	39.6	0.0123481	130.299
630	7.3	0.2286	39.6	0.0123481	128.929
800	7.3	0.2286	39.6	0.0123481	126.299
1000	7.3	0.2286	39.6	0.0123481	122.539
1250	7.3	0.2286	39.6	0.0123481	123.189
1600	7.3	0.2286	39.6	0.0123481	121.059
2000	7.3	0.2286	39.6	0.0123481	117.809
2500	7.3	0.2286	39.6	0.0123481	116.559
3150	7.3	0.2286	39.6	0.0123481	114.309
4000	7.3	0.2286	39.6	0.0123481	114.079
5000	7.3	0.2286	39.6	0.0123481	111.959
6300	7.3	0.2286	39.6	0.0123481	110.839
200	7.3	0.2286	31.7	0.0132672	128.679
250	7.3	0.2286	31.7	0.0132672	130.089
315	7.3	0.2286	31.7	0.0132672	130.239
400	7.3	0.2286	31.7	0.0132672	130.269
500	7.3	0.2286	31.7	0.0132672	128.169
630	7.3	0.2286	31.7	0.0132672	126.189
800	7.3	0.2286	31.7	0.0132672	123.209
1000	7.3	0.2286	31.7	0.0132672	119.099
1250	7.3	0.2286	31.7	0.0132672	120.509
1600	7.3	0.2286	31.7	0.0132672	119.039
2000	7.3	0.2286	31.7	0.0132672	115.309
2500	7.3	0.2286	31.7	0.0132672	114.709
3150	7.3	0.2286	31.7	0.0132672	113.229
4000	7.3	0.2286	31.7	0.0132672	112.639
5000	7.3	0.2286	31.7	0.0132672	111.029
6300	7.3	0.2286	31.7	0.0132672	110.689
800	0	0.1524	71.3	0.0015988	125.817
1000	0	0.1524	71.3	0.0015988	127.307
1250	0	0.1524	71.3	0.0015988	128.927
1600	0	0.1524	71.3	0.0015988	129.667
2000	0	0.1524	71.3	0.0015988	128.647
2500	0	0.1524	71.3	0.0015988	128.127
3150	0	0.1524	71.3	0.0015988	129.377
4000	0	0.1524	71.3	0.0015988	128.857
5000	0	0.1524	71.3	0.0015988	126.457
6300	0	0.1524	71.3	0.0015988	125.427
8000	0	0.1524	71.3	0.0015988	122.527
10000	0	0.1524	71.3	0.0015988	120.247
12500	0	0.1524	71.3	0.0015988	117.087
16000	0	0.1524	71.3	0.0015988	113.297
500	0	0.1524	55.5	0.00172668	120.573
630	0	0.1524	55.5	0.00172668	123.583
800	0	0.1524	55.5	0.00172668	126.713
1000	0	0.1524	55.5	0.00172668	128.583
1250	0	0.1524	55.5	0.00172668	129.953
1600	0	0.1524	55.5	0.00172668	130.183
2000	0	0.1524	55.5	0.00172668	129.673
2500	0	0.1524	55.5	0.00172668	127.763
3150	0	0.1524	55.5	0.00172668	127.753
4000	0	0.1524	55.5	0.00172668	127.233
5000	0	0.1524	55.5	0.00172668	125.203
6300	0	0.1524	55.5	0.00172668	123.303
8000	0	0.1524	55.5	0.00172668	121.903
10000	0	0.1524	55.5	0.00172668	119.253
12500	0	0.1524	55.5	0.00172668	117.093
16000	0	0.1524	55.5	0.00172668	112.803
500	0	0.1524	39.6	0.00193287	119.513
630	0	0.1524	39.6	0.00193287	124.403
800	0	0.1524	39.6	0.00193287	127.903
1000	0	0.1524	39.6	0.00193287	130.033
1250	0	0.1524	39.6	0.00193287	131.023
1600	0	0.1524	39.6	0.00193287	131.013
2000	0	0.1524	39.6	0.00193287	129.633
2500	0	0.1524	39.6	0.00193287	126.863
3150	0	0.1524	39.6	0.00193287	125.603
4000	0	0.1524	39.6	0.00193287	125.343
5000	0	0.1524	39.6	0.00193287	123.453
6300	0	0.1524	39.6	0.00193287	121.313
8000	0	0.1524	39.6	0.00193287	120.553
10000	0	0.1524	39.6	0.00193287	115.413
500	0	0.1524	31.7	0.00209405	121.617
630	0	0.1524	31.7	0.00209405	125.997
800	0	0.1524	31.7	0.00209405	129.117
1000	0	0.1524	31.7	0.00209405	130.987
1250	0	0.1524	31.7	0.00209405	131.467
1600	0	0.1524	31.7	0.00209405	130.817
2000	0	0.1524	31.7	0.00209405	128.907
2500	0	0.1524	31.7	0.00209405	125.867
3150	0	0.1524	31.7	0.00209405	124.207
4000	0	0.1524	31.7	0.00209405	123.807
5000	0	0.1524	31.7	0.00209405	122.397
6300	0	0.1524	31.7	0.00209405	119.737
8000	0	0.1524	31.7	0.00209405	117.957
630	2.7	0.1524	71.3	0.00243851	127.404
800	2.7	0.1524	71.3	0.00243851	127.394
1000	2.7	0.1524	71.3	0.00243851	128.774
1250	2.7	0.1524	71.3	0.00243851	130.144
1600	2.7	0.1524	71.3	0.00243851	130.644
2000	2.7	0.1524	71.3	0.00243851	130.114
2500	2.7	0.1524	71.3	0.00243851	128.334
3150	2.7	0.1524	71.3	0.00243851	127.054
4000	2.7	0.1524	71.3	0.00243851	126.534
5000	2.7	0.1524	71.3	0.00243851	124.364
6300	2.7	0.1524	71.3	0.00243851	121.944
8000	2.7	0.1524	71.3	0.00243851	120.534
10000	2.7	0.1524	71.3	0.00243851	116.724
12500	2.7	0.1524	71.3	0.00243851	113.034
16000	2.7	0.1524	71.3	0.00243851	110.364
500	2.7	0.1524	39.6	0.00294804	121.009
630	2.7	0.1524	39.6	0.00294804	125.809
800	2.7	0.1524	39.6	0.00294804	128.829
1000	2.7	0.1524	39.6	0.00294804	130.589
1250	2.7	0.1524	39.6	0.00294804	130.829
1600	2.7	0.1524	39.6	0.00294804	130.049
2000	2.7	0.1524	39.6	0.00294804	128.139
2500	2.7	0.1524	39.6	0.00294804	125.589
3150	2.7	0.1524	39.6	0.00294804	122.919
4000	2.7	0.1524	39.6	0.00294804	121.889
5000	2.7	0.1524	39.6	0.00294804	121.499
6300	2.7	0.1524	39.6	0.00294804	119.209
8000	2.7	0.1524	39.6	0.00294804	116.659
10000	2.7	0.1524	39.6	0.00294804	112.589
12500	2.7	0.1524	39.6	0.00294804	108.649
400	5.4	0.1524	71.3	0.00401199	124.121
500	5.4	0.1524	71.3	0.00401199	126.291
630	5.4	0.1524	71.3	0.00401199	128.971
800	5.4	0.1524	71.3	0.00401199	131.281
1000	5.4	0.1524	71.3	0.00401199	133.201
1250	5.4	0.1524	71.3	0.00401199	134.111
1600	5.4	0.1524	71.3	0.00401199	133.241
2000	5.4	0.1524	71.3	0.00401199	131.111
2500	5.4	0.1524	71.3	0.00401199	127.591
3150	5.4	0.1524	71.3	0.00401199	123.311
4000	5.4	0.1524	71.3	0.00401199	121.431
5000	5.4	0.1524	71.3	0.00401199	120.061
6300	5.4	0.1524	71.3	0.00401199	116.411
400	5.4	0.1524	55.5	0.00433288	126.807
500	5.4	0.1524	55.5	0.00433288	129.367
630	5.4	0.1524	55.5	0.00433288	131.807
800	5.4	0.1524	55.5	0.00433288	133.097
1000	5.4	0.1524	55.5	0.00433288	132.127
1250	5.4	0.1524	55.5	0.00433288	130.777
1600	5.4	0.1524	55.5	0.00433288	130.567
2000	5.4	0.1524	55.5	0.00433288	128.707
2500	5.4	0.1524	55.5	0.00433288	124.077
3150	5.4	0.1524	55.5	0.00433288	121.587
4000	5.4	0.1524	55.5	0.00433288	119.737
5000	5.4	0.1524	55.5	0.00433288	118.757
6300	5.4	0.1524	55.5	0.00433288	117.287
8000	5.4	0.1524	55.5	0.00433288	114.927
315	5.4	0.1524	39.6	0.00485029	125.347
400	5.4	0.1524	39.6	0.00485029	127.637
500	5.4	0.1524	39.6	0.00485029	129.937
630	5.4	0.1524	39.6	0.00485029	132.357
800	5.4	0.1524	39.6	0.00485029	132.757
1000	5.4	0.1524	39.6	0.00485029	130.507
1250	5.4	0.1524	39.6	0.00485029	127.117
1600	5.4	0.1524	39.6	0.00485029	126.267
2000	5.4	0.1524	39.6	0.00485029	124.647
2500	5.4	0.1524	39.6	0.00485029	120.497
3150	5.4	0.1524	39.6	0.00485029	119.137
4000	5.4	0.1524	39.6	0.00485029	117.137
5000	5.4	0.1524	39.6	0.00485029	117.037
6300	5.4	0.1524	39.6	0.00485029	116.677
315	5.4	0.1524	31.7	0.00525474	125.741
400	5.4	0.1524	31.7	0.00525474	127.781
500	5.4	0.1524	31.7	0.00525474	129.681
630	5.4	0.1524	31.7	0.00525474	131.471
800	5.4	0.1524	31.7	0.00525474	131.491
1000	5.4	0.1524	31.7	0.00525474	128.241
1250	5.4	0.1524	31.7	0.00525474	123.991
1600	5.4	0.1524	31.7	0.00525474	123.761
2000	5.4	0.1524	31.7	0.00525474	122.771
2500	5.4	0.1524	31.7	0.00525474	119.151
3150	5.4	0.1524	31.7	0.00525474	118.291
4000	5.4	0.1524	31.7	0.00525474	116.181
5000	5.4	0.1524	31.7	0.00525474	115.691
6300	5.4	0.1524	31.7	0.00525474	115.591
315	7.2	0.1524	71.3	0.00752039	128.713
400	7.2	0.1524	71.3	0.00752039	130.123
500	7.2	0.1524	71.3	0.00752039	132.043
630	7.2	0.1524	71.3	0.00752039	134.853
800	7.2	0.1524	71.3	0.00752039	136.023
1000	7.2	0.1524	71.3	0.00752039	134.273
1250	7.2	0.1524	71.3	0.00752039	132.513
1600	7.2	0.1524	71.3	0.00752039	130.893
2000	7.2	0.1524	71.3	0.00752039	128.643
2500	7.2	0.1524	71.3	0.00752039	124.353
3150	7.2	0.1524	71.3	0.00752039	116.783
4000	7.2	0.1524	71.3	0.00752039	119.343
5000	7.2	0.1524	71.3	0.00752039	118.343
6300	7.2	0.1524	71.3	0.00752039	116.603
8000	7.2	0.1524	71.3	0.00752039	113.333
10000	7.2	0.1524	71.3	0.00752039	110.313
250	7.2	0.1524	39.6	0.00909175	127.488
315	7.2	0.1524	39.6	0.00909175	130.558
400	7.2	0.1524	39.6	0.00909175	132.118
500	7.2	0.1524	39.6	0.00909175	132.658
630	7.2	0.1524	39.6	0.00909175	133.198
800	7.2	0.1524	39.6	0.00909175	132.358
1000	7.2	0.1524	39.6	0.00909175	128.338
1250	7.2	0.1524	39.6	0.00909175	122.428
1600	7.2	0.1524	39.6	0.00909175	120.058
2000	7.2	0.1524	39.6	0.00909175	120.228
2500	7.2	0.1524	39.6	0.00909175	117.478
3150	7.2	0.1524	39.6	0.00909175	111.818
4000	7.2	0.1524	39.6	0.00909175	114.258
5000	7.2	0.1524	39.6	0.00909175	113.288
6300	7.2	0.1524	39.6	0.00909175	112.688
8000	7.2	0.1524	39.6	0.00909175	111.588
10000	7.2	0.1524	39.6	0.00909175	110.868
200	9.9	0.1524	71.3	0.0193001	134.319
250	9.9	0.1524	71.3	0.0193001	135.329
315	9.9	0.1524	71.3	0.0193001	135.459
400	9.9	0.1524	71.3	0.0193001	135.079
500	9.9	0.1524	71.3	0.0193001	131.279
630	9.9	0.1524	71.3	0.0193001	129.889
800	9.9	0.1524	71.3	0.0193001	128.879
1000	9.9	0.1524	71.3	0.0193001	126.349
1250	9.9	0.1524	71.3	0.0193001	122.679
1600	9.9	0.1524	71.3	0.0193001	121.789
2000	9.9	0.1524	71.3	0.0193001	120.779
2500	9.9	0.1524	71.3	0.0193001	119.639
3150	9.9	0.1524	71.3	0.0193001	116.849
4000	9.9	0.1524	71.3	0.0193001	115.079
5000	9.9	0.1524	71.3	0.0193001	114.569
6300	9.9	0.1524	71.3	0.0193001	112.039
200	9.9	0.1524	55.5	0.0208438	131.955
250	9.9	0.1524	55.5	0.0208438	133.235
315	9.9	0.1524	55.5	0.0208438	132.355
400	9.9	0.1524	55.5	0.0208438	131.605
500	9.9	0.1524	55.5	0.0208438	127.815
630	9.9	0.1524	55.5	0.0208438	127.315
800	9.9	0.1524	55.5	0.0208438	126.565
1000	9.9	0.1524	55.5	0.0208438	124.665
1250	9.9	0.1524	55.5	0.0208438	121.635
1600	9.9	0.1524	55.5	0.0208438	119.875
2000	9.9	0.1524	55.5	0.0208438	119.505
2500	9.9	0.1524	55.5	0.0208438	118.365
3150	9.9	0.1524	55.5	0.0208438	115.085
4000	9.9	0.1524	55.5	0.0208438	112.945
5000	9.9	0.1524	55.5	0.0208438	112.065
6300	9.9	0.1524	55.5	0.0208438	110.555
200	9.9	0.1524	39.6	0.0233328	127.315
250	9.9	0.1524	39.6	0.0233328	128.335
315	9.9	0.1524	39.6	0.0233328	128.595
400	9.9	0.1524	39.6	0.0233328	128.345
500	9.9	0.1524	39.6	0.0233328	126.835
630	9.9	0.1524	39.6	0.0233328	126.465
800	9.9	0.1524	39.6	0.0233328	126.345
1000	9.9	0.1524	39.6	0.0233328	123.835
1250	9.9	0.1524	39.6	0.0233328	120.555
1600	9.9	0.1524	39.6	0.0233328	118.545
2000	9.9	0.1524	39.6	0.0233328	117.925
2500	9.9	0.1524	39.6	0.0233328	116.295
3150	9.9	0.1524	39.6	0.0233328	113.525
4000	9.9	0.1524	39.6	0.0233328	112.265
5000	9.9	0.1524	39.6	0.0233328	111.135
6300	9.9	0.1524	39.6	0.0233328	109.885
200	9.9	0.1524	31.7	0.0252785	127.299
250	9.9	0.1524	31.7	0.0252785	128.559
315	9.9	0.1524	31.7	0.0252785	128.809
400	9.9	0.1524	31.7	0.0252785	128.939
500	9.9	0.1524	31.7	0.0252785	127.179
630	9.9	0.1524	31.7	0.0252785	126.049
800	9.9	0.1524	31.7	0.0252785	125.539
1000	9.9	0.1524	31.7	0.0252785	122.149
1250	9.9	0.1524	31.7	0.0252785	118.619
1600	9.9	0.1524	31.7	0.0252785	117.119
2000	9.9	0.1524	31.7	0.0252785	116.859
2500	9.9	0.1524	31.7	0.0252785	114.729
3150	9.9	0.1524	31.7	0.0252785	112.209
4000	9.9	0.1524	31.7	0.0252785	111.459
5000	9.9	0.1524	31.7	0.0252785	109.949
6300	9.9	0.1524	31.7	0.0252785	108.689
200	12.6	0.1524	71.3	0.0483159	128.354
250	12.6	0.1524	71.3	0.0483159	129.744
315	12.6	0.1524	71.3	0.0483159	128.484
400	12.6	0.1524	71.3	0.0483159	127.094
500	12.6	0.1524	71.3	0.0483159	121.664
630	12.6	0.1524	71.3	0.0483159	123.304
800	12.6	0.1524	71.3	0.0483159	123.054
1000	12.6	0.1524	71.3	0.0483159	122.044
1250	12.6	0.1524	71.3	0.0483159	120.154
1600	12.6	0.1524	71.3	0.0483159	120.534
2000	12.6	0.1524	71.3	0.0483159	117.504
2500	12.6	0.1524	71.3	0.0483159	115.234
3150	12.6	0.1524	71.3	0.0483159	113.334
4000	12.6	0.1524	71.3	0.0483159	108.034
5000	12.6	0.1524	71.3	0.0483159	108.034
6300	12.6	0.1524	71.3	0.0483159	107.284
200	12.6	0.1524	39.6	0.0584113	114.750
250	12.6	0.1524	39.6	0.0584113	115.890
315	12.6	0.1524	39.6	0.0584113	116.020
400	12.6	0.1524	39.6	0.0584113	115.910
500	12.6	0.1524	39.6	0.0584113	114.900
630	12.6	0.1524	39.6	0.0584113	116.550
800	12.6	0.1524	39.6	0.0584113	116.560
1000	12.6	0.1524	39.6	0.0584113	114.670
1250	12.6	0.1524	39.6	0.0584113	112.160
1600	12.6	0.1524	39.6	0.0584113	110.780
2000	12.6	0.1524	39.6	0.0584113	109.520
2500	12.6	0.1524	39.6	0.0584113	106.880
3150	12.6	0.1524	39.6	0.0584113	106.260
4000	12.6	0.1524	39.6	0.0584113	104.500
5000	12.6	0.1524	39.6	0.0584113	104.130
6300	12.6	0.1524	39.6	0.0584113	103.380
800	0	0.0508	71.3	0.000740478	130.960
1000	0	0.0508	71.3	0.000740478	129.450
1250	0	0.0508	71.3	0.000740478	128.560
1600	0	0.0508	71.3	0.000740478	129.680
2000	0	0.0508	71.3	0.000740478	131.060
2500	0	0.0508	71.3	0.000740478	131.310
3150	0	0.0508	71.3	0.000740478	135.070
4000	0	0.0508	71.3	0.000740478	134.430
5000	0	0.0508	71.3	0.000740478	134.430
6300	0	0.0508	71.3	0.000740478	133.040
8000	0	0.0508	71.3	0.000740478	130.890
10000	0	0.0508	71.3	0.000740478	128.740
12500	0	0.0508	71.3	0.000740478	125.220
800	0	0.0508	55.5	0.00076193	124.336
1000	0	0.0508	55.5	0.00076193	125.586
1250	0	0.0508	55.5	0.00076193	127.076
1600	0	0.0508	55.5	0.00076193	128.576
2000	0	0.0508	55.5	0.00076193	131.456
2500	0	0.0508	55.5	0.00076193	133.956
3150	0	0.0508	55.5	0.00076193	134.826
4000	0	0.0508	55.5	0.00076193	134.946
5000	0	0.0508	55.5	0.00076193	134.556
6300	0	0.0508	55.5	0.00076193	132.796
8000	0	0.0508	55.5	0.00076193	130.156
10000	0	0.0508	55.5	0.00076193	127.636
12500	0	0.0508	55.5	0.00076193	125.376
800	0	0.0508	39.6	0.000791822	126.508
1000	0	0.0508	39.6	0.000791822	127.638
1250	0	0.0508	39.6	0.000791822	129.148
1600	0	0.0508	39.6	0.000791822	130.908
2000	0	0.0508	39.6	0.000791822	132.918
2500	0	0.0508	39.6	0.000791822	134.938
3150	0	0.0508	39.6	0.000791822	135.938
4000	0	0.0508	39.6	0.000791822	135.308
5000	0	0.0508	39.6	0.000791822	134.308
6300	0	0.0508	39.6	0.000791822	131.918
8000	0	0.0508	39.6	0.000791822	128.518
10000	0	0.0508	39.6	0.000791822	125.998
12500	0	0.0508	39.6	0.000791822	123.988
800	0	0.0508	31.7	0.000812164	122.790
1000	0	0.0508	31.7	0.000812164	126.780
1250	0	0.0508	31.7	0.000812164	129.270
1600	0	0.0508	31.7	0.000812164	131.010
2000	0	0.0508	31.7	0.000812164	133.010
2500	0	0.0508	31.7	0.000812164	134.870
3150	0	0.0508	31.7	0.000812164	135.490
4000	0	0.0508	31.7	0.000812164	134.110
5000	0	0.0508	31.7	0.000812164	133.230
6300	0	0.0508	31.7	0.000812164	130.340
8000	0	0.0508	31.7	0.000812164	126.590
10000	0	0.0508	31.7	0.000812164	122.450
12500	0	0.0508	31.7	0.000812164	119.070
1600	4.2	0.0508	71.3	0.00142788	124.318
2000	4.2	0.0508	71.3	0.00142788	129.848
2500	4.2	0.0508	71.3	0.00142788	131.978
3150	4.2	0.0508	71.3	0.00142788	133.728
4000	4.2	0.0508	71.3	0.00142788	133.598
5000	4.2	0.0508	71.3	0.00142788	132.828
6300	4.2	0.0508	71.3	0.00142788	129.308
8000	4.2	0.0508	71.3	0.00142788	125.268
10000	4.2	0.0508	71.3	0.00142788	121.238
12500	4.2	0.0508	71.3	0.00142788	117.328
1000	4.2	0.0508	39.6	0.00152689	125.647
1250	4.2	0.0508	39.6	0.00152689	128.427
1600	4.2	0.0508	39.6	0.00152689	130.197
2000	4.2	0.0508	39.6	0.00152689	132.587
2500	4.2	0.0508	39.6	0.00152689	133.847
3150	4.2	0.0508	39.6	0.00152689	133.587
4000	4.2	0.0508	39.6	0.00152689	131.807
5000	4.2	0.0508	39.6	0.00152689	129.777
6300	4.2	0.0508	39.6	0.00152689	125.717
8000	4.2	0.0508	39.6	0.00152689	120.397
10000	4.2	0.0508	39.6	0.00152689	116.967
800	8.4	0.0508	71.3	0.00529514	127.556
1000	8.4	0.0508	71.3	0.00529514	129.946
1250	8.4	0.0508	71.3	0.00529514	132.086
1600	8.4	0.0508	71.3	0.00529514	133.846
2000	8.4	0.0508	71.3	0.00529514	134.476
2500	8.4	0.0508	71.3	0.00529514	134.226
3150	8.4	0.0508	71.3	0.00529514	131.966
4000	8.4	0.0508	71.3	0.00529514	126.926
5000	8.4	0.0508	71.3	0.00529514	121.146
400	8.4	0.0508	55.5	0.00544854	121.582
500	8.4	0.0508	55.5	0.00544854	123.742
630	8.4	0.0508	55.5	0.00544854	126.152
800	8.4	0.0508	55.5	0.00544854	128.562
1000	8.4	0.0508	55.5	0.00544854	130.722
1250	8.4	0.0508	55.5	0.00544854	132.252
1600	8.4	0.0508	55.5	0.00544854	133.032
2000	8.4	0.0508	55.5	0.00544854	133.042
2500	8.4	0.0508	55.5	0.00544854	131.542
3150	8.4	0.0508	55.5	0.00544854	128.402
4000	8.4	0.0508	55.5	0.00544854	122.612
5000	8.4	0.0508	55.5	0.00544854	115.812
400	8.4	0.0508	39.6	0.00566229	120.015
500	8.4	0.0508	39.6	0.00566229	122.905
630	8.4	0.0508	39.6	0.00566229	126.045
800	8.4	0.0508	39.6	0.00566229	128.435
1000	8.4	0.0508	39.6	0.00566229	130.195
1250	8.4	0.0508	39.6	0.00566229	131.205
1600	8.4	0.0508	39.6	0.00566229	130.965
2000	8.4	0.0508	39.6	0.00566229	129.965
2500	8.4	0.0508	39.6	0.00566229	127.465
3150	8.4	0.0508	39.6	0.00566229	123.965
4000	8.4	0.0508	39.6	0.00566229	118.955
400	8.4	0.0508	31.7	0.00580776	120.076
500	8.4	0.0508	31.7	0.00580776	122.966
630	8.4	0.0508	31.7	0.00580776	125.856
800	8.4	0.0508	31.7	0.00580776	128.246
1000	8.4	0.0508	31.7	0.00580776	129.516
1250	8.4	0.0508	31.7	0.00580776	130.156
1600	8.4	0.0508	31.7	0.00580776	129.296
2000	8.4	0.0508	31.7	0.00580776	127.686
2500	8.4	0.0508	31.7	0.00580776	125.576
3150	8.4	0.0508	31.7	0.00580776	122.086
4000	8.4	0.0508	31.7	0.00580776	118.106
200	11.2	0.0508	71.3	0.014072	125.941
250	11.2	0.0508	71.3	0.014072	127.101
315	11.2	0.0508	71.3	0.014072	128.381
400	11.2	0.0508	71.3	0.014072	129.281
500	11.2	0.0508	71.3	0.014072	130.311
630	11.2	0.0508	71.3	0.014072	133.611
800	11.2	0.0508	71.3	0.014072	136.031
1000	11.2	0.0508	71.3	0.014072	136.941
1250	11.2	0.0508	71.3	0.014072	136.191
1600	11.2	0.0508	71.3	0.014072	135.191
2000	11.2	0.0508	71.3	0.014072	133.311
2500	11.2	0.0508	71.3	0.014072	130.541
3150	11.2	0.0508	71.3	0.014072	127.141
4000	11.2	0.0508	71.3	0.014072	122.471
200	11.2	0.0508	39.6	0.0150478	125.010
250	11.2	0.0508	39.6	0.0150478	126.430
315	11.2	0.0508	39.6	0.0150478	128.990
400	11.2	0.0508	39.6	0.0150478	130.670
500	11.2	0.0508	39.6	0.0150478	131.960
630	11.2	0.0508	39.6	0.0150478	133.130
800	11.2	0.0508	39.6	0.0150478	133.790
1000	11.2	0.0508	39.6	0.0150478	132.430
1250	11.2	0.0508	39.6	0.0150478	130.050
1600	11.2	0.0508	39.6	0.0150478	126.540
2000	11.2	0.0508	39.6	0.0150478	124.420
2500	11.2	0.0508	39.6	0.0150478	122.170
3150	11.2	0.0508	39.6	0.0150478	119.670
4000	11.2	0.0508	39.6	0.0150478	115.520
200	15.4	0.0508	71.3	0.0264269	123.595
250	15.4	0.0508	71.3	0.0264269	124.835
315	15.4	0.0508	71.3	0.0264269	126.195
400	15.4	0.0508	71.3	0.0264269	126.805
500	15.4	0.0508	71.3	0.0264269	127.285
630	15.4	0.0508	71.3	0.0264269	129.645
800	15.4	0.0508	71.3	0.0264269	131.515
1000	15.4	0.0508	71.3	0.0264269	131.865
1250	15.4	0.0508	71.3	0.0264269	130.845
1600	15.4	0.0508	71.3	0.0264269	130.065
2000	15.4	0.0508	71.3	0.0264269	129.285
2500	15.4	0.0508	71.3	0.0264269	127.625
3150	15.4	0.0508	71.3	0.0264269	125.715
4000	15.4	0.0508	71.3	0.0264269	122.675
5000	15.4	0.0508	71.3	0.0264269	119.135
6300	15.4	0.0508	71.3	0.0264269	115.215
8000	15.4	0.0508	71.3	0.0264269	112.675
200	15.4	0.0508	55.5	0.0271925	122.940
250	15.4	0.0508	55.5	0.0271925	124.170
315	15.4	0.0508	55.5	0.0271925	125.390
400	15.4	0.0508	55.5	0.0271925	126.500
500	15.4	0.0508	55.5	0.0271925	127.220
630	15.4	0.0508	55.5	0.0271925	129.330
800	15.4	0.0508	55.5	0.0271925	130.430
1000	15.4	0.0508	55.5	0.0271925	130.400
1250	15.4	0.0508	55.5	0.0271925	130.000
1600	15.4	0.0508	55.5	0.0271925	128.200
2000	15.4	0.0508	55.5	0.0271925	127.040
2500	15.4	0.0508	55.5	0.0271925	125.630
3150	15.4	0.0508	55.5	0.0271925	123.460
4000	15.4	0.0508	55.5	0.0271925	120.920
5000	15.4	0.0508	55.5	0.0271925	117.110
6300	15.4	0.0508	55.5	0.0271925	112.930
200	15.4	0.0508	39.6	0.0282593	121.783
250	15.4	0.0508	39.6	0.0282593	122.893
315	15.4	0.0508	39.6	0.0282593	124.493
400	15.4	0.0508	39.6	0.0282593	125.353
500	15.4	0.0508	39.6	0.0282593	125.963
630	15.4	0.0508	39.6	0.0282593	127.443
800	15.4	0.0508	39.6	0.0282593	128.423
1000	15.4	0.0508	39.6	0.0282593	127.893
1250	15.4	0.0508	39.6	0.0282593	126.743
1600	15.4	0.0508	39.6	0.0282593	124.843
2000	15.4	0.0508	39.6	0.0282593	123.443
2500	15.4	0.0508	39.6	0.0282593	122.413
3150	15.4	0.0508	39.6	0.0282593	120.513
4000	15.4	0.0508	39.6	0.0282593	118.113
5000	15.4	0.0508	39.6	0.0282593	114.453
6300	15.4	0.0508	39.6	0.0282593	109.663
200	15.4	0.0508	31.7	0.0289853	119.975
250	15.4	0.0508	31.7	0.0289853	121.225
315	15.4	0.0508	31.7	0.0289853	122.845
400	15.4	0.0508	31.7	0.0289853	123.705
500	15.4	0.0508	31.7	0.0289853	123.695
630	15.4	0.0508	31.7	0.0289853	124.685
800	15.4	0.0508	31.7	0.0289853	125.555
1000	15.4	0.0508	31.7	0.0289853	124.525
1250	15.4	0.0508	31.7	0.0289853	123.255
1600	15.4	0.0508	31.7	0.0289853	121.485
2000	15.4	0.0508	31.7	0.0289853	120.835
2500	15.4	0.0508	31.7	0.0289853	119.945
3150	15.4	0.0508	31.7	0.0289853	118.045
4000	15.4	0.0508	31.7	0.0289853	115.635
5000	15.4	0.0508	31.7	0.0289853	112.355
6300	15.4	0.0508	31.7	0.0289853	108.185
200	19.7	0.0508	71.3	0.0341183	118.005
250	19.7	0.0508	71.3	0.0341183	119.115
315	19.7	0.0508	71.3	0.0341183	121.235
400	19.7	0.0508	71.3	0.0341183	123.865
500	19.7	0.0508	71.3	0.0341183	126.995
630	19.7	0.0508	71.3	0.0341183	128.365
800	19.7	0.0508	71.3	0.0341183	124.555
1000	19.7	0.0508	71.3	0.0341183	121.885
1250	19.7	0.0508	71.3	0.0341183	121.485
1600	19.7	0.0508	71.3	0.0341183	120.575
2000	19.7	0.0508	71.3	0.0341183	120.055
2500	19.7	0.0508	71.3	0.0341183	118.385
3150	19.7	0.0508	71.3	0.0341183	116.225
4000	19.7	0.0508	71.3	0.0341183	113.045
200	19.7	0.0508	39.6	0.036484	125.974
250	19.7	0.0508	39.6	0.036484	127.224
315	19.7	0.0508	39.6	0.036484	129.864
400	19.7	0.0508	39.6	0.036484	130.614
500	19.7	0.0508	39.6	0.036484	128.444
630	19.7	0.0508	39.6	0.036484	120.324
800	19.7	0.0508	39.6	0.036484	119.174
1000	19.7	0.0508	39.6	0.036484	118.904
1250	19.7	0.0508	39.6	0.036484	118.634
1600	19.7	0.0508	39.6	0.036484	117.604
2000	19.7	0.0508	39.6	0.036484	117.724
2500	19.7	0.0508	39.6	0.036484	116.184
3150	19.7	0.0508	39.6	0.036484	113.004
4000	19.7	0.0508	39.6	0.036484	108.684
2500	0	0.0254	71.3	0.000400682	133.707
3150	0	0.0254	71.3	0.000400682	137.007
4000	0	0.0254	71.3	0.000400682	138.557
5000	0	0.0254	71.3	0.000400682	136.837
6300	0	0.0254	71.3	0.000400682	134.987
8000	0	0.0254	71.3	0.000400682	129.867
10000	0	0.0254	71.3	0.000400682	130.787
12500	0	0.0254	71.3	0.000400682	133.207
16000	0	0.0254	71.3	0.000400682	130.477
20000	0	0.0254	71.3	0.000400682	123.217
2000	0	0.0254	55.5	0.00041229	127.623
2500	0	0.0254	55.5	0.00041229	130.073
3150	0	0.0254	55.5	0.00041229	130.503
4000	0	0.0254	55.5	0.00041229	133.223
5000	0	0.0254	55.5	0.00041229	135.803
6300	0	0.0254	55.5	0.00041229	136.103
8000	0	0.0254	55.5	0.00041229	136.163
10000	0	0.0254	55.5	0.00041229	134.563
12500	0	0.0254	55.5	0.00041229	131.453
16000	0	0.0254	55.5	0.00041229	125.683
20000	0	0.0254	55.5	0.00041229	121.933
1600	0	0.0254	39.6	0.000428464	124.156
2000	0	0.0254	39.6	0.000428464	130.026
2500	0	0.0254	39.6	0.000428464	131.836
3150	0	0.0254	39.6	0.000428464	133.276
4000	0	0.0254	39.6	0.000428464	135.346
5000	0	0.0254	39.6	0.000428464	136.536
6300	0	0.0254	39.6	0.000428464	136.826
8000	0	0.0254	39.6	0.000428464	135.866
10000	0	0.0254	39.6	0.000428464	133.376
12500	0	0.0254	39.6	0.000428464	129.116
16000	0	0.0254	39.6	0.000428464	124.986
1000	0	0.0254	31.7	0.000439472	125.127
1250	0	0.0254	31.7	0.000439472	127.947
1600	0	0.0254	31.7	0.000439472	129.267
2000	0	0.0254	31.7	0.000439472	130.697
2500	0	0.0254	31.7	0.000439472	132.897
3150	0	0.0254	31.7	0.000439472	135.227
4000	0	0.0254	31.7	0.000439472	137.047
5000	0	0.0254	31.7	0.000439472	138.607
6300	0	0.0254	31.7	0.000439472	138.537
8000	0	0.0254	31.7	0.000439472	137.207
10000	0	0.0254	31.7	0.000439472	134.227
12500	0	0.0254	31.7	0.000439472	128.977
16000	0	0.0254	31.7	0.000439472	125.627
2000	4.8	0.0254	71.3	0.000848633	128.398
2500	4.8	0.0254	71.3	0.000848633	130.828
3150	4.8	0.0254	71.3	0.000848633	133.378
4000	4.8	0.0254	71.3	0.000848633	134.928
5000	4.8	0.0254	71.3	0.000848633	135.468
6300	4.8	0.0254	71.3	0.000848633	134.498
8000	4.8	0.0254	71.3	0.000848633	131.518
10000	4.8	0.0254	71.3	0.000848633	127.398
12500	4.8	0.0254	71.3	0.000848633	127.688
16000	4.8	0.0254	71.3	0.000848633	124.208
20000	4.8	0.0254	71.3	0.000848633	119.708
1600	4.8	0.0254	55.5	0.000873218	121.474
2000	4.8	0.0254	55.5	0.000873218	125.054
2500	4.8	0.0254	55.5	0.000873218	129.144
3150	4.8	0.0254	55.5	0.000873218	132.354
4000	4.8	0.0254	55.5	0.000873218	133.924
5000	4.8	0.0254	55.5	0.000873218	135.484
6300	4.8	0.0254	55.5	0.000873218	135.164
8000	4.8	0.0254	55.5	0.000873218	132.184
10000	4.8	0.0254	55.5	0.000873218	126.944
12500	4.8	0.0254	55.5	0.000873218	125.094
16000	4.8	0.0254	55.5	0.000873218	124.394
20000	4.8	0.0254	55.5	0.000873218	121.284
500	4.8	0.0254	39.6	0.000907475	116.366
630	4.8	0.0254	39.6	0.000907475	118.696
800	4.8	0.0254	39.6	0.000907475	120.766
1000	4.8	0.0254	39.6	0.000907475	122.956
1250	4.8	0.0254	39.6	0.000907475	125.026
1600	4.8	0.0254	39.6	0.000907475	125.966
2000	4.8	0.0254	39.6	0.000907475	128.916
2500	4.8	0.0254	39.6	0.000907475	131.236
3150	4.8	0.0254	39.6	0.000907475	133.436
4000	4.8	0.0254	39.6	0.000907475	134.996
5000	4.8	0.0254	39.6	0.000907475	135.426
6300	4.8	0.0254	39.6	0.000907475	134.336
8000	4.8	0.0254	39.6	0.000907475	131.346
10000	4.8	0.0254	39.6	0.000907475	126.066
500	4.8	0.0254	31.7	0.000930789	116.128
630	4.8	0.0254	31.7	0.000930789	120.078
800	4.8	0.0254	31.7	0.000930789	122.648
1000	4.8	0.0254	31.7	0.000930789	125.348
1250	4.8	0.0254	31.7	0.000930789	127.408
1600	4.8	0.0254	31.7	0.000930789	128.718
2000	4.8	0.0254	31.7	0.000930789	130.148
2500	4.8	0.0254	31.7	0.000930789	132.588
3150	4.8	0.0254	31.7	0.000930789	134.268
4000	4.8	0.0254	31.7	0.000930789	135.328
5000	4.8	0.0254	31.7	0.000930789	135.248
6300	4.8	0.0254	31.7	0.000930789	132.898
8000	4.8	0.0254	31.7	0.000930789	127.008
630	9.5	0.0254	71.3	0.00420654	125.726
800	9.5	0.0254	71.3	0.00420654	127.206
1000	9.5	0.0254	71.3	0.00420654	129.556
1250	9.5	0.0254	71.3	0.00420654	131.656
1600	9.5	0.0254	71.3	0.00420654	133.756
2000	9.5	0.0254	71.3	0.00420654	134.976
2500	9.5	0.0254	71.3	0.00420654	135.956
3150	9.5	0.0254	71.3	0.00420654	136.166
4000	9.5	0.0254	71.3	0.00420654	134.236
5000	9.5	0.0254	71.3	0.00420654	131.186
6300	9.5	0.0254	71.3	0.00420654	127.246
400	9.5	0.0254	55.5	0.0043284	120.952
500	9.5	0.0254	55.5	0.0043284	123.082
630	9.5	0.0254	55.5	0.0043284	125.452
800	9.5	0.0254	55.5	0.0043284	128.082
1000	9.5	0.0254	55.5	0.0043284	130.332
1250	9.5	0.0254	55.5	0.0043284	132.202
1600	9.5	0.0254	55.5	0.0043284	133.062
2000	9.5	0.0254	55.5	0.0043284	134.052
2500	9.5	0.0254	55.5	0.0043284	134.152
3150	9.5	0.0254	55.5	0.0043284	133.252
4000	9.5	0.0254	55.5	0.0043284	131.582
5000	9.5	0.0254	55.5	0.0043284	128.412
6300	9.5	0.0254	55.5	0.0043284	124.222
200	9.5	0.0254	39.6	0.00449821	116.074
250	9.5	0.0254	39.6	0.00449821	116.924
315	9.5	0.0254	39.6	0.00449821	119.294
400	9.5	0.0254	39.6	0.00449821	121.154
500	9.5	0.0254	39.6	0.00449821	123.894
630	9.5	0.0254	39.6	0.00449821	126.514
800	9.5	0.0254	39.6	0.00449821	129.014
1000	9.5	0.0254	39.6	0.00449821	130.374
1250	9.5	0.0254	39.6	0.00449821	130.964
1600	9.5	0.0254	39.6	0.00449821	131.184
2000	9.5	0.0254	39.6	0.00449821	131.274
2500	9.5	0.0254	39.6	0.00449821	131.234
3150	9.5	0.0254	39.6	0.00449821	129.934
4000	9.5	0.0254	39.6	0.00449821	127.864
5000	9.5	0.0254	39.6	0.00449821	125.044
6300	9.5	0.0254	39.6	0.00449821	120.324
200	9.5	0.0254	31.7	0.00461377	119.146
250	9.5	0.0254	31.7	0.00461377	120.136
315	9.5	0.0254	31.7	0.00461377	122.766
400	9.5	0.0254	31.7	0.00461377	124.756
500	9.5	0.0254	31.7	0.00461377	126.886
630	9.5	0.0254	31.7	0.00461377	129.006
800	9.5	0.0254	31.7	0.00461377	130.746
1000	9.5	0.0254	31.7	0.00461377	131.346
1250	9.5	0.0254	31.7	0.00461377	131.446
1600	9.5	0.0254	31.7	0.00461377	131.036
2000	9.5	0.0254	31.7	0.00461377	130.496
2500	9.5	0.0254	31.7	0.00461377	130.086
3150	9.5	0.0254	31.7	0.00461377	128.536
4000	9.5	0.0254	31.7	0.00461377	126.736
5000	9.5	0.0254	31.7	0.00461377	124.426
6300	9.5	0.0254	31.7	0.00461377	120.726
250	12.7	0.0254	71.3	0.0121808	119.698
315	12.7	0.0254	71.3	0.0121808	122.938
400	12.7	0.0254	71.3	0.0121808	125.048
500	12.7	0.0254	71.3	0.0121808	126.898
630	12.7	0.0254	71.3	0.0121808	128.878
800	12.7	0.0254	71.3	0.0121808	130.348
1000	12.7	0.0254	71.3	0.0121808	131.698
1250	12.7	0.0254	71.3	0.0121808	133.048
1600	12.7	0.0254	71.3	0.0121808	134.528
2000	12.7	0.0254	71.3	0.0121808	134.228
2500	12.7	0.0254	71.3	0.0121808	134.058
3150	12.7	0.0254	71.3	0.0121808	133.758
4000	12.7	0.0254	71.3	0.0121808	131.808
5000	12.7	0.0254	71.3	0.0121808	128.978
6300	12.7	0.0254	71.3	0.0121808	125.398
8000	12.7	0.0254	71.3	0.0121808	120.538
10000	12.7	0.0254	71.3	0.0121808	114.418
250	12.7	0.0254	39.6	0.0130253	121.547
315	12.7	0.0254	39.6	0.0130253	123.537
400	12.7	0.0254	39.6	0.0130253	125.527
500	12.7	0.0254	39.6	0.0130253	127.127
630	12.7	0.0254	39.6	0.0130253	128.867
800	12.7	0.0254	39.6	0.0130253	130.217
1000	12.7	0.0254	39.6	0.0130253	130.947
1250	12.7	0.0254	39.6	0.0130253	130.777
1600	12.7	0.0254	39.6	0.0130253	129.977
2000	12.7	0.0254	39.6	0.0130253	129.567
2500	12.7	0.0254	39.6	0.0130253	129.027
3150	12.7	0.0254	39.6	0.0130253	127.847
4000	12.7	0.0254	39.6	0.0130253	126.537
5000	12.7	0.0254	39.6	0.0130253	125.107
6300	12.7	0.0254	39.6	0.0130253	123.177
8000	12.7	0.0254	39.6	0.0130253	120.607
10000	12.7	0.0254	39.6	0.0130253	116.017
200	17.4	0.0254	71.3	0.016104	112.506
250	17.4	0.0254	71.3	0.016104	113.796
315	17.4	0.0254	71.3	0.016104	115.846
400	17.4	0.0254	71.3	0.016104	117.396
500	17.4	0.0254	71.3	0.016104	119.806
630	17.4	0.0254	71.3	0.016104	122.606
800	17.4	0.0254	71.3	0.016104	124.276
1000	17.4	0.0254	71.3	0.016104	125.816
1250	17.4	0.0254	71.3	0.016104	126.356
1600	17.4	0.0254	71.3	0.016104	126.406
2000	17.4	0.0254	71.3	0.016104	126.826
2500	17.4	0.0254	71.3	0.016104	126.746
3150	17.4	0.0254	71.3	0.016104	126.536
4000	17.4	0.0254	71.3	0.016104	125.586
5000	17.4	0.0254	71.3	0.016104	123.126
6300	17.4	0.0254	71.3	0.016104	119.916
8000	17.4	0.0254	71.3	0.016104	115.466
200	17.4	0.0254	55.5	0.0165706	109.951
250	17.4	0.0254	55.5	0.0165706	110.491
315	17.4	0.0254	55.5	0.0165706	111.911
400	17.4	0.0254	55.5	0.0165706	115.461
500	17.4	0.0254	55.5	0.0165706	119.621
630	17.4	0.0254	55.5	0.0165706	122.411
800	17.4	0.0254	55.5	0.0165706	123.091
1000	17.4	0.0254	55.5	0.0165706	126.001
1250	17.4	0.0254	55.5	0.0165706	129.301
1600	17.4	0.0254	55.5	0.0165706	126.471
2000	17.4	0.0254	55.5	0.0165706	125.261
2500	17.4	0.0254	55.5	0.0165706	124.931
3150	17.4	0.0254	55.5	0.0165706	124.101
4000	17.4	0.0254	55.5	0.0165706	121.771
5000	17.4	0.0254	55.5	0.0165706	118.941
6300	17.4	0.0254	55.5	0.0165706	114.861
200	17.4	0.0254	39.6	0.0172206	114.044
250	17.4	0.0254	39.6	0.0172206	114.714
315	17.4	0.0254	39.6	0.0172206	115.144
400	17.4	0.0254	39.6	0.0172206	115.444
500	17.4	0.0254	39.6	0.0172206	117.514
630	17.4	0.0254	39.6	0.0172206	124.514
800	17.4	0.0254	39.6	0.0172206	135.324
1000	17.4	0.0254	39.6	0.0172206	138.274
1250	17.4	0.0254	39.6	0.0172206	131.364
1600	17.4	0.0254	39.6	0.0172206	127.614
2000	17.4	0.0254	39.6	0.0172206	126.644
2500	17.4	0.0254	39.6	0.0172206	124.154
3150	17.4	0.0254	39.6	0.0172206	123.564
4000	17.4	0.0254	39.6	0.0172206	122.724
5000	17.4	0.0254	39.6	0.0172206	119.854
200	17.4	0.0254	31.7	0.0176631	116.146
250	17.4	0.0254	31.7	0.0176631	116.956
315	17.4	0.0254	31.7	0.0176631	118.416
400	17.4	0.0254	31.7	0.0176631	120.766
500	17.4	0.0254	31.7	0.0176631	127.676
630	17.4	0.0254	31.7	0.0176631	136.886
800	17.4	0.0254	31.7	0.0176631	139.226
1000	17.4	0.0254	31.7	0.0176631	131.796
1250	17.4	0.0254	31.7	0.0176631	128.306
1600	17.4	0.0254	31.7	0.0176631	126.846
2000	17.4	0.0254	31.7	0.0176631	124.356
2500	17.4	0.0254	31.7	0.0176631	124.166
3150	17.4	0.0254	31.7	0.0176631	123.466
4000	17.4	0.0254	31.7	0.0176631	121.996
5000	17.4	0.0254	31.7	0.0176631	117.996
315	22.2	0.0254	71.3	0.0214178	115.857
400	22.2	0.0254	71.3	0.0214178	117.927
500	22.2	0.0254	71.3	0.0214178	117.967
630	22.2	0.0254	71.3	0.0214178	120.657
800	22.2	0.0254	71.3	0.0214178	123.227
1000	22.2	0.0254	71.3	0.0214178	134.247
1250	22.2	0.0254	71.3	0.0214178	140.987
1600	22.2	0.0254	71.3	0.0214178	131.817
2000	22.2	0.0254	71.3	0.0214178	127.197
2500	22.2	0.0254	71.3	0.0214178	126.097
3150	22.2	0.0254	71.3	0.0214178	124.127
4000	22.2	0.0254	71.3	0.0214178	123.917
5000	22.2	0.0254	71.3	0.0214178	125.727
6300	22.2	0.0254	71.3	0.0214178	123.127
8000	22.2	0.0254	71.3	0.0214178	121.657
200	22.2	0.0254	39.6	0.0229028	116.066
250	22.2	0.0254	39.6	0.0229028	117.386
315	22.2	0.0254	39.6	0.0229028	120.716
400	22.2	0.0254	39.6	0.0229028	123.416
500	22.2	0.0254	39.6	0.0229028	129.776
630	22.2	0.0254	39.6	0.0229028	137.026
800	22.2	0.0254	39.6	0.0229028	137.076
1000	22.2	0.0254	39.6	0.0229028	128.416
1250	22.2	0.0254	39.6	0.0229028	126.446
1600	22.2	0.0254	39.6	0.0229028	122.216
2000	22.2	0.0254	39.6	0.0229028	121.256
2500	22.2	0.0254	39.6	0.0229028	121.306
3150	22.2	0.0254	39.6	0.0229028	120.856
4000	22.2	0.0254	39.6	0.0229028	119.646
5000	22.2	0.0254	39.6	0.0229028	118.816
630	0	0.1016	71.3	0.00121072	124.155
800	0	0.1016	71.3	0.00121072	126.805
1000	0	0.1016	71.3	0.00121072	128.825
1250	0	0.1016	71.3	0.00121072	130.335
1600	0	0.1016	71.3	0.00121072	131.725
2000	0	0.1016	71.3	0.00121072	132.095
2500	0	0.1016	71.3	0.00121072	132.595
3150	0	0.1016	71.3	0.00121072	131.955
4000	0	0.1016	71.3	0.00121072	130.935
5000	0	0.1016	71.3	0.00121072	130.795
6300	0	0.1016	71.3	0.00121072	129.395
8000	0	0.1016	71.3	0.00121072	125.465
10000	0	0.1016	71.3	0.00121072	123.305
12500	0	0.1016	71.3	0.00121072	119.375
630	0	0.1016	55.5	0.00131983	126.170
800	0	0.1016	55.5	0.00131983	127.920
1000	0	0.1016	55.5	0.00131983	129.800
1250	0	0.1016	55.5	0.00131983	131.430
1600	0	0.1016	55.5	0.00131983	132.050
2000	0	0.1016	55.5	0.00131983	132.540
2500	0	0.1016	55.5	0.00131983	133.040
3150	0	0.1016	55.5	0.00131983	131.780
4000	0	0.1016	55.5	0.00131983	129.500
5000	0	0.1016	55.5	0.00131983	128.360
6300	0	0.1016	55.5	0.00131983	127.730
8000	0	0.1016	55.5	0.00131983	124.450
10000	0	0.1016	55.5	0.00131983	121.930
12500	0	0.1016	55.5	0.00131983	119.910
630	0	0.1016	39.6	0.00146332	125.401
800	0	0.1016	39.6	0.00146332	128.401
1000	0	0.1016	39.6	0.00146332	130.781
1250	0	0.1016	39.6	0.00146332	132.271
1600	0	0.1016	39.6	0.00146332	133.261
2000	0	0.1016	39.6	0.00146332	133.251
2500	0	0.1016	39.6	0.00146332	132.611
3150	0	0.1016	39.6	0.00146332	130.961
4000	0	0.1016	39.6	0.00146332	127.801
5000	0	0.1016	39.6	0.00146332	126.021
6300	0	0.1016	39.6	0.00146332	125.631
8000	0	0.1016	39.6	0.00146332	122.341
10000	0	0.1016	39.6	0.00146332	119.561
630	0	0.1016	31.7	0.00150092	126.413
800	0	0.1016	31.7	0.00150092	129.053
1000	0	0.1016	31.7	0.00150092	131.313
1250	0	0.1016	31.7	0.00150092	133.063
1600	0	0.1016	31.7	0.00150092	133.553
2000	0	0.1016	31.7	0.00150092	133.153
2500	0	0.1016	31.7	0.00150092	132.003
3150	0	0.1016	31.7	0.00150092	129.973
4000	0	0.1016	31.7	0.00150092	126.933
5000	0	0.1016	31.7	0.00150092	124.393
6300	0	0.1016	31.7	0.00150092	124.253
8000	0	0.1016	31.7	0.00150092	120.193
10000	0	0.1016	31.7	0.00150092	115.893
800	3.3	0.1016	71.3	0.00202822	131.074
1000	3.3	0.1016	71.3	0.00202822	131.434
1250	3.3	0.1016	71.3	0.00202822	132.304
1600	3.3	0.1016	71.3	0.00202822	133.664
2000	3.3	0.1016	71.3	0.00202822	134.034
2500	3.3	0.1016	71.3	0.00202822	133.894
3150	3.3	0.1016	71.3	0.00202822	132.114
4000	3.3	0.1016	71.3	0.00202822	128.704
5000	3.3	0.1016	71.3	0.00202822	127.054
6300	3.3	0.1016	71.3	0.00202822	124.904
8000	3.3	0.1016	71.3	0.00202822	121.234
10000	3.3	0.1016	71.3	0.00202822	116.694
630	3.3	0.1016	55.5	0.002211	126.599
800	3.3	0.1016	55.5	0.002211	129.119
1000	3.3	0.1016	55.5	0.002211	131.129
1250	3.3	0.1016	55.5	0.002211	132.769
1600	3.3	0.1016	55.5	0.002211	133.649
2000	3.3	0.1016	55.5	0.002211	133.649
2500	3.3	0.1016	55.5	0.002211	132.889
3150	3.3	0.1016	55.5	0.002211	130.629
4000	3.3	0.1016	55.5	0.002211	127.229
5000	3.3	0.1016	55.5	0.002211	124.839
6300	3.3	0.1016	55.5	0.002211	123.839
8000	3.3	0.1016	55.5	0.002211	120.569
10000	3.3	0.1016	55.5	0.002211	115.659
630	3.3	0.1016	39.6	0.00245138	127.251
800	3.3	0.1016	39.6	0.00245138	129.991
1000	3.3	0.1016	39.6	0.00245138	131.971
1250	3.3	0.1016	39.6	0.00245138	133.211
1600	3.3	0.1016	39.6	0.00245138	133.071
2000	3.3	0.1016	39.6	0.00245138	132.301
2500	3.3	0.1016	39.6	0.00245138	130.791
3150	3.3	0.1016	39.6	0.00245138	128.401
4000	3.3	0.1016	39.6	0.00245138	124.881
5000	3.3	0.1016	39.6	0.00245138	122.371
6300	3.3	0.1016	39.6	0.00245138	120.851
8000	3.3	0.1016	39.6	0.00245138	118.091
10000	3.3	0.1016	39.6	0.00245138	115.321
630	3.3	0.1016	31.7	0.00251435	128.952
800	3.3	0.1016	31.7	0.00251435	131.362
1000	3.3	0.1016	31.7	0.00251435	133.012
1250	3.3	0.1016	31.7	0.00251435	134.022
1600	3.3	0.1016	31.7	0.00251435	133.402
2000	3.3	0.1016	31.7	0.00251435	131.642
2500	3.3	0.1016	31.7	0.00251435	130.392
3150	3.3	0.1016	31.7	0.00251435	128.252
4000	3.3	0.1016	31.7	0.00251435	124.852
5000	3.3	0.1016	31.7	0.00251435	122.082
6300	3.3	0.1016	31.7	0.00251435	120.702
8000	3.3	0.1016	31.7	0.00251435	117.432
630	6.7	0.1016	71.3	0.00478288	131.448
800	6.7	0.1016	71.3	0.00478288	134.478
1000	6.7	0.1016	71.3	0.00478288	136.758
1250	6.7	0.1016	71.3	0.00478288	137.658
1600	6.7	0.1016	71.3	0.00478288	136.678
2000	6.7	0.1016	71.3	0.00478288	134.568
2500	6.7	0.1016	71.3	0.00478288	131.458
3150	6.7	0.1016	71.3	0.00478288	124.458
500	6.7	0.1016	55.5	0.0052139	129.343
630	6.7	0.1016	55.5	0.0052139	133.023
800	6.7	0.1016	55.5	0.0052139	135.953
1000	6.7	0.1016	55.5	0.0052139	137.233
1250	6.7	0.1016	55.5	0.0052139	136.883
1600	6.7	0.1016	55.5	0.0052139	133.653
2000	6.7	0.1016	55.5	0.0052139	129.653
2500	6.7	0.1016	55.5	0.0052139	124.273
400	6.7	0.1016	39.6	0.00578076	128.295
500	6.7	0.1016	39.6	0.00578076	130.955
630	6.7	0.1016	39.6	0.00578076	133.355
800	6.7	0.1016	39.6	0.00578076	134.625
1000	6.7	0.1016	39.6	0.00578076	134.515
1250	6.7	0.1016	39.6	0.00578076	132.395
1600	6.7	0.1016	39.6	0.00578076	127.375
2000	6.7	0.1016	39.6	0.00578076	122.235
315	6.7	0.1016	31.7	0.00592927	126.266
400	6.7	0.1016	31.7	0.00592927	128.296
500	6.7	0.1016	31.7	0.00592927	130.206
630	6.7	0.1016	31.7	0.00592927	132.116
800	6.7	0.1016	31.7	0.00592927	132.886
1000	6.7	0.1016	31.7	0.00592927	131.636
1250	6.7	0.1016	31.7	0.00592927	129.256
1600	6.7	0.1016	31.7	0.00592927	124.346
2000	6.7	0.1016	31.7	0.00592927	120.446
200	8.9	0.1016	71.3	0.0103088	133.503
250	8.9	0.1016	71.3	0.0103088	134.533
315	8.9	0.1016	71.3	0.0103088	136.583
400	8.9	0.1016	71.3	0.0103088	138.123
500	8.9	0.1016	71.3	0.0103088	138.523
630	8.9	0.1016	71.3	0.0103088	138.423
800	8.9	0.1016	71.3	0.0103088	137.813
1000	8.9	0.1016	71.3	0.0103088	135.433
1250	8.9	0.1016	71.3	0.0103088	132.793
1600	8.9	0.1016	71.3	0.0103088	128.763
2000	8.9	0.1016	71.3	0.0103088	124.233
2500	8.9	0.1016	71.3	0.0103088	123.623
3150	8.9	0.1016	71.3	0.0103088	123.263
4000	8.9	0.1016	71.3	0.0103088	120.243
5000	8.9	0.1016	71.3	0.0103088	116.723
6300	8.9	0.1016	71.3	0.0103088	117.253
200	8.9	0.1016	39.6	0.0124596	133.420
250	8.9	0.1016	39.6	0.0124596	134.340
315	8.9	0.1016	39.6	0.0124596	135.380
400	8.9	0.1016	39.6	0.0124596	135.540
500	8.9	0.1016	39.6	0.0124596	133.790
630	8.9	0.1016	39.6	0.0124596	131.920
800	8.9	0.1016	39.6	0.0124596	130.940
1000	8.9	0.1016	39.6	0.0124596	129.580
1250	8.9	0.1016	39.6	0.0124596	127.710
1600	8.9	0.1016	39.6	0.0124596	123.820
2000	8.9	0.1016	39.6	0.0124596	119.040
2500	8.9	0.1016	39.6	0.0124596	119.190
3150	8.9	0.1016	39.6	0.0124596	119.350
4000	8.9	0.1016	39.6	0.0124596	116.220
5000	8.9	0.1016	39.6	0.0124596	113.080
6300	8.9	0.1016	39.6	0.0124596	113.110
200	12.3	0.1016	71.3	0.0337792	130.588
250	12.3	0.1016	71.3	0.0337792	131.568
315	12.3	0.1016	71.3	0.0337792	137.068
400	12.3	0.1016	71.3	0.0337792	139.428
500	12.3	0.1016	71.3	0.0337792	140.158
630	12.3	0.1016	71.3	0.0337792	135.368
800	12.3	0.1016	71.3	0.0337792	127.318
1000	12.3	0.1016	71.3	0.0337792	127.928
1250	12.3	0.1016	71.3	0.0337792	126.648
1600	12.3	0.1016	71.3	0.0337792	124.748
2000	12.3	0.1016	71.3	0.0337792	122.218
2500	12.3	0.1016	71.3	0.0337792	121.318
3150	12.3	0.1016	71.3	0.0337792	120.798
4000	12.3	0.1016	71.3	0.0337792	118.018
5000	12.3	0.1016	71.3	0.0337792	116.108
6300	12.3	0.1016	71.3	0.0337792	113.958
200	12.3	0.1016	55.5	0.0368233	132.304
250	12.3	0.1016	55.5	0.0368233	133.294
315	12.3	0.1016	55.5	0.0368233	135.674
400	12.3	0.1016	55.5	0.0368233	136.414
500	12.3	0.1016	55.5	0.0368233	133.774
630	12.3	0.1016	55.5	0.0368233	124.244
800	12.3	0.1016	55.5	0.0368233	125.114
1000	12.3	0.1016	55.5	0.0368233	125.484
1250	12.3	0.1016	55.5	0.0368233	124.214
1600	12.3	0.1016	55.5	0.0368233	121.824
2000	12.3	0.1016	55.5	0.0368233	118.564
2500	12.3	0.1016	55.5	0.0368233	117.054
3150	12.3	0.1016	55.5	0.0368233	116.914
4000	12.3	0.1016	55.5	0.0368233	114.404
5000	12.3	0.1016	55.5	0.0368233	112.014
6300	12.3	0.1016	55.5	0.0368233	110.124
200	12.3	0.1016	39.6	0.0408268	128.545
250	12.3	0.1016	39.6	0.0408268	129.675
315	12.3	0.1016	39.6	0.0408268	129.415
400	12.3	0.1016	39.6	0.0408268	128.265
500	12.3	0.1016	39.6	0.0408268	122.205
630	12.3	0.1016	39.6	0.0408268	121.315
800	12.3	0.1016	39.6	0.0408268	122.315
1000	12.3	0.1016	39.6	0.0408268	122.435
1250	12.3	0.1016	39.6	0.0408268	121.165
1600	12.3	0.1016	39.6	0.0408268	117.875
2000	12.3	0.1016	39.6	0.0408268	114.085
2500	12.3	0.1016	39.6	0.0408268	113.315
3150	12.3	0.1016	39.6	0.0408268	113.055
4000	12.3	0.1016	39.6	0.0408268	110.905
5000	12.3	0.1016	39.6	0.0408268	108.625
6300	12.3	0.1016	39.6	0.0408268	107.985
200	12.3	0.1016	31.7	0.0418756	124.987
250	12.3	0.1016	31.7	0.0418756	125.857
315	12.3	0.1016	31.7	0.0418756	124.717
400	12.3	0.1016	31.7	0.0418756	123.207
500	12.3	0.1016	31.7	0.0418756	118.667
630	12.3	0.1016	31.7	0.0418756	119.287
800	12.3	0.1016	31.7	0.0418756	120.037
1000	12.3	0.1016	31.7	0.0418756	119.777
1250	12.3	0.1016	31.7	0.0418756	118.767
1600	12.3	0.1016	31.7	0.0418756	114.477
2000	12.3	0.1016	31.7	0.0418756	110.447
2500	12.3	0.1016	31.7	0.0418756	110.317
3150	12.3	0.1016	31.7	0.0418756	110.307
4000	12.3	0.1016	31.7	0.0418756	108.407
5000	12.3	0.1016	31.7	0.0418756	107.147
6300	12.3	0.1016	31.7	0.0418756	107.267
200	15.6	0.1016	71.3	0.0437259	130.898
250	15.6	0.1016	71.3	0.0437259	132.158
315	15.6	0.1016	71.3	0.0437259	133.808
400	15.6	0.1016	71.3	0.0437259	134.058
500	15.6	0.1016	71.3	0.0437259	130.638
630	15.6	0.1016	71.3	0.0437259	122.288
800	15.6	0.1016	71.3	0.0437259	124.188
1000	15.6	0.1016	71.3	0.0437259	124.438
1250	15.6	0.1016	71.3	0.0437259	123.178
1600	15.6	0.1016	71.3	0.0437259	121.528
2000	15.6	0.1016	71.3	0.0437259	119.888
2500	15.6	0.1016	71.3	0.0437259	118.998
3150	15.6	0.1016	71.3	0.0437259	116.468
4000	15.6	0.1016	71.3	0.0437259	113.298
200	15.6	0.1016	39.6	0.0528487	123.514
250	15.6	0.1016	39.6	0.0528487	124.644
315	15.6	0.1016	39.6	0.0528487	122.754
400	15.6	0.1016	39.6	0.0528487	120.484
500	15.6	0.1016	39.6	0.0528487	115.304
630	15.6	0.1016	39.6	0.0528487	118.084
800	15.6	0.1016	39.6	0.0528487	118.964
1000	15.6	0.1016	39.6	0.0528487	119.224
1250	15.6	0.1016	39.6	0.0528487	118.214
1600	15.6	0.1016	39.6	0.0528487	114.554
2000	15.6	0.1016	39.6	0.0528487	110.894
2500	15.6	0.1016	39.6	0.0528487	110.264
3150	15.6	0.1016	39.6	0.0528487	109.254
4000	15.6	0.1016	39.6	0.0528487	106.604
5000	15.6	0.1016	39.6	0.0528487	106.224
6300	15.6	0.1016	39.6	0.0528487	104.204
