# Supplementary material
Source: ML conference proceedings conference paper supplement (https://proceedings.mlr.press/v108/ishibashi20a.html)
Supplement: Supplementary file 2 [file ishibashi20a-supp.zip › 137_supp/program/dataset/concrete/concrete_data.txt]

540.0	0.0	0.0	162.0	2.5	1040.0	676.0	28	79.99
540.0	0.0	0.0	162.0	2.5	1055.0	676.0	28	61.89
332.5	142.5	0.0	228.0	0.0	932.0	594.0	270	40.27
332.5	142.5	0.0	228.0	0.0	932.0	594.0	365	41.05
198.6	132.4	0.0	192.0	0.0	978.4	825.5	360	44.30
266.0	114.0	0.0	228.0	0.0	932.0	670.0	90	47.03
380.0	95.0	0.0	228.0	0.0	932.0	594.0	365	43.70
380.0	95.0	0.0	228.0	0.0	932.0	594.0	28	36.45
266.0	114.0	0.0	228.0	0.0	932.0	670.0	28	45.85
475.0	0.0	0.0	228.0	0.0	932.0	594.0	28	39.29
198.6	132.4	0.0	192.0	0.0	978.4	825.5	90	38.07
198.6	132.4	0.0	192.0	0.0	978.4	825.5	28	28.02
427.5	47.5	0.0	228.0	0.0	932.0	594.0	270	43.01
190.0	190.0	0.0	228.0	0.0	932.0	670.0	90	42.33
304.0	76.0	0.0	228.0	0.0	932.0	670.0	28	47.81
380.0	0.0	0.0	228.0	0.0	932.0	670.0	90	52.91
139.6	209.4	0.0	192.0	0.0	1047.0	806.9	90	39.36
342.0	38.0	0.0	228.0	0.0	932.0	670.0	365	56.14
380.0	95.0	0.0	228.0	0.0	932.0	594.0	90	40.56
475.0	0.0	0.0	228.0	0.0	932.0	594.0	180	42.62
427.5	47.5	0.0	228.0	0.0	932.0	594.0	180	41.84
139.6	209.4	0.0	192.0	0.0	1047.0	806.9	28	28.24
139.6	209.4	0.0	192.0	0.0	1047.0	806.9	3	8.06
139.6	209.4	0.0	192.0	0.0	1047.0	806.9	180	44.21
380.0	0.0	0.0	228.0	0.0	932.0	670.0	365	52.52
380.0	0.0	0.0	228.0	0.0	932.0	670.0	270	53.30
380.0	95.0	0.0	228.0	0.0	932.0	594.0	270	41.15
342.0	38.0	0.0	228.0	0.0	932.0	670.0	180	52.12
427.5	47.5	0.0	228.0	0.0	932.0	594.0	28	37.43
475.0	0.0	0.0	228.0	0.0	932.0	594.0	7	38.60
304.0	76.0	0.0	228.0	0.0	932.0	670.0	365	55.26
266.0	114.0	0.0	228.0	0.0	932.0	670.0	365	52.91
198.6	132.4	0.0	192.0	0.0	978.4	825.5	180	41.72
475.0	0.0	0.0	228.0	0.0	932.0	594.0	270	42.13
190.0	190.0	0.0	228.0	0.0	932.0	670.0	365	53.69
237.5	237.5	0.0	228.0	0.0	932.0	594.0	270	38.41
237.5	237.5	0.0	228.0	0.0	932.0	594.0	28	30.08
332.5	142.5	0.0	228.0	0.0	932.0	594.0	90	37.72
475.0	0.0	0.0	228.0	0.0	932.0	594.0	90	42.23
237.5	237.5	0.0	228.0	0.0	932.0	594.0	180	36.25
342.0	38.0	0.0	228.0	0.0	932.0	670.0	90	50.46
427.5	47.5	0.0	228.0	0.0	932.0	594.0	365	43.70
237.5	237.5	0.0	228.0	0.0	932.0	594.0	365	39.00
380.0	0.0	0.0	228.0	0.0	932.0	670.0	180	53.10
427.5	47.5	0.0	228.0	0.0	932.0	594.0	90	41.54
427.5	47.5	0.0	228.0	0.0	932.0	594.0	7	35.08
349.0	0.0	0.0	192.0	0.0	1047.0	806.9	3	15.05
380.0	95.0	0.0	228.0	0.0	932.0	594.0	180	40.76
237.5	237.5	0.0	228.0	0.0	932.0	594.0	7	26.26
380.0	95.0	0.0	228.0	0.0	932.0	594.0	7	32.82
332.5	142.5	0.0	228.0	0.0	932.0	594.0	180	39.78
190.0	190.0	0.0	228.0	0.0	932.0	670.0	180	46.93
237.5	237.5	0.0	228.0	0.0	932.0	594.0	90	33.12
304.0	76.0	0.0	228.0	0.0	932.0	670.0	90	49.19
139.6	209.4	0.0	192.0	0.0	1047.0	806.9	7	14.59
198.6	132.4	0.0	192.0	0.0	978.4	825.5	7	14.64
475.0	0.0	0.0	228.0	0.0	932.0	594.0	365	41.93
198.6	132.4	0.0	192.0	0.0	978.4	825.5	3	9.13
304.0	76.0	0.0	228.0	0.0	932.0	670.0	180	50.95
332.5	142.5	0.0	228.0	0.0	932.0	594.0	28	33.02
304.0	76.0	0.0	228.0	0.0	932.0	670.0	270	54.38
266.0	114.0	0.0	228.0	0.0	932.0	670.0	270	51.73
310.0	0.0	0.0	192.0	0.0	971.0	850.6	3	9.87
190.0	190.0	0.0	228.0	0.0	932.0	670.0	270	50.66
266.0	114.0	0.0	228.0	0.0	932.0	670.0	180	48.70
342.0	38.0	0.0	228.0	0.0	932.0	670.0	270	55.06
139.6	209.4	0.0	192.0	0.0	1047.0	806.9	360	44.70
332.5	142.5	0.0	228.0	0.0	932.0	594.0	7	30.28
190.0	190.0	0.0	228.0	0.0	932.0	670.0	28	40.86
485.0	0.0	0.0	146.0	0.0	1120.0	800.0	28	71.99
374.0	189.2	0.0	170.1	10.1	926.1	756.7	3	34.40
313.3	262.2	0.0	175.5	8.6	1046.9	611.8	3	28.80
425.0	106.3	0.0	153.5	16.5	852.1	887.1	3	33.40
425.0	106.3	0.0	151.4	18.6	936.0	803.7	3	36.30
375.0	93.8	0.0	126.6	23.4	852.1	992.6	3	29.00
475.0	118.8	0.0	181.1	8.9	852.1	781.5	3	37.80
469.0	117.2	0.0	137.8	32.2	852.1	840.5	3	40.20
425.0	106.3	0.0	153.5	16.5	852.1	887.1	3	33.40
388.6	97.1	0.0	157.9	12.1	852.1	925.7	3	28.10
531.3	0.0	0.0	141.8	28.2	852.1	893.7	3	41.30
425.0	106.3	0.0	153.5	16.5	852.1	887.1	3	33.40
318.8	212.5	0.0	155.7	14.3	852.1	880.4	3	25.20
401.8	94.7	0.0	147.4	11.4	946.8	852.1	3	41.10
362.6	189.0	0.0	164.9	11.6	944.7	755.8	3	35.30
323.7	282.8	0.0	183.8	10.3	942.7	659.9	3	28.30
379.5	151.2	0.0	153.9	15.9	1134.3	605.0	3	28.60
362.6	189.0	0.0	164.9	11.6	944.7	755.8	3	35.30
286.3	200.9	0.0	144.7	11.2	1004.6	803.7	3	24.40
362.6	189.0	0.0	164.9	11.6	944.7	755.8	3	35.30
439.0	177.0	0.0	186.0	11.1	884.9	707.9	3	39.30
389.9	189.0	0.0	145.9	22.0	944.7	755.8	3	40.60
362.6	189.0	0.0	164.9	11.6	944.7	755.8	3	35.30
337.9	189.0	0.0	174.9	9.5	944.7	755.8	3	24.10
374.0	189.2	0.0	170.1	10.1	926.1	756.7	7	46.20
313.3	262.2	0.0	175.5	8.6	1046.9	611.8	7	42.80
425.0	106.3	0.0	153.5	16.5	852.1	887.1	7	49.20
425.0	106.3	0.0	151.4	18.6	936.0	803.7	7	46.80
375.0	93.8	0.0	126.6	23.4	852.1	992.6	7	45.70
475.0	118.8	0.0	181.1	8.9	852.1	781.5	7	55.60
469.0	117.2	0.0	137.8	32.2	852.1	840.5	7	54.90
425.0	106.3	0.0	153.5	16.5	852.1	887.1	7	49.20
388.6	97.1	0.0	157.9	12.1	852.1	925.7	7	34.90
531.3	0.0	0.0	141.8	28.2	852.1	893.7	7	46.90
425.0	106.3	0.0	153.5	16.5	852.1	887.1	7	49.20
318.8	212.5	0.0	155.7	14.3	852.1	880.4	7	33.40
401.8	94.7	0.0	147.4	11.4	946.8	852.1	7	54.10
362.6	189.0	0.0	164.9	11.6	944.7	755.8	7	55.90
323.7	282.8	0.0	183.8	10.3	942.7	659.9	7	49.80
379.5	151.2	0.0	153.9	15.9	1134.3	605.0	7	47.10
362.6	189.0	0.0	164.9	11.6	944.7	755.8	7	55.90
286.3	200.9	0.0	144.7	11.2	1004.6	803.7	7	38.00
362.6	189.0	0.0	164.9	11.6	944.7	755.8	7	55.90
439.0	177.0	0.0	186.0	11.1	884.9	707.9	7	56.10
389.9	189.0	0.0	145.9	22.0	944.7	755.8	7	59.09
362.6	189.0	0.0	164.9	11.6	944.7	755.8	7	22.90
337.9	189.0	0.0	174.9	9.5	944.7	755.8	7	35.10
374.0	189.2	0.0	170.1	10.1	926.1	756.7	28	61.09
313.3	262.2	0.0	175.5	8.6	1046.9	611.8	28	59.80
425.0	106.3	0.0	153.5	16.5	852.1	887.1	28	60.29
425.0	106.3	0.0	151.4	18.6	936.0	803.7	28	61.80
375.0	93.8	0.0	126.6	23.4	852.1	992.6	28	56.70
475.0	118.8	0.0	181.1	8.9	852.1	781.5	28	68.30
469.0	117.2	0.0	137.8	32.2	852.1	840.5	28	66.90
425.0	106.3	0.0	153.5	16.5	852.1	887.1	28	60.29
388.6	97.1	0.0	157.9	12.1	852.1	925.7	28	50.70
531.3	0.0	0.0	141.8	28.2	852.1	893.7	28	56.40
425.0	106.3	0.0	153.5	16.5	852.1	887.1	28	60.29
318.8	212.5	0.0	155.7	14.3	852.1	880.4	28	55.50
401.8	94.7	0.0	147.4	11.4	946.8	852.1	28	68.50
362.6	189.0	0.0	164.9	11.6	944.7	755.8	28	71.30
323.7	282.8	0.0	183.8	10.3	942.7	659.9	28	74.70
379.5	151.2	0.0	153.9	15.9	1134.3	605.0	28	52.20
362.6	189.0	0.0	164.9	11.6	944.7	755.8	28	71.30
286.3	200.9	0.0	144.7	11.2	1004.6	803.7	28	67.70
362.6	189.0	0.0	164.9	11.6	944.7	755.8	28	71.30
439.0	177.0	0.0	186.0	11.1	884.9	707.9	28	66.00
389.9	189.0	0.0	145.9	22.0	944.7	755.8	28	74.50
362.6	189.0	0.0	164.9	11.6	944.7	755.8	28	71.30
337.9	189.0	0.0	174.9	9.5	944.7	755.8	28	49.90
374.0	189.2	0.0	170.1	10.1	926.1	756.7	56	63.40
313.3	262.2	0.0	175.5	8.6	1046.9	611.8	56	64.90
425.0	106.3	0.0	153.5	16.5	852.1	887.1	56	64.30
425.0	106.3	0.0	151.4	18.6	936.0	803.7	56	64.90
375.0	93.8	0.0	126.6	23.4	852.1	992.6	56	60.20
475.0	118.8	0.0	181.1	8.9	852.1	781.5	56	72.30
469.0	117.2	0.0	137.8	32.2	852.1	840.5	56	69.30
425.0	106.3	0.0	153.5	16.5	852.1	887.1	56	64.30
388.6	97.1	0.0	157.9	12.1	852.1	925.7	56	55.20
531.3	0.0	0.0	141.8	28.2	852.1	893.7	56	58.80
425.0	106.3	0.0	153.5	16.5	852.1	887.1	56	64.30
318.8	212.5	0.0	155.7	14.3	852.1	880.4	56	66.10
401.8	94.7	0.0	147.4	11.4	946.8	852.1	56	73.70
362.6	189.0	0.0	164.9	11.6	944.7	755.8	56	77.30
323.7	282.8	0.0	183.8	10.3	942.7	659.9	56	80.20
379.5	151.2	0.0	153.9	15.9	1134.3	605.0	56	54.90
362.6	189.0	0.0	164.9	11.6	944.7	755.8	56	77.30
286.3	200.9	0.0	144.7	11.2	1004.6	803.7	56	72.99
362.6	189.0	0.0	164.9	11.6	944.7	755.8	56	77.30
439.0	177.0	0.0	186.0	11.1	884.9	707.9	56	71.70
389.9	189.0	0.0	145.9	22.0	944.7	755.8	56	79.40
362.6	189.0	0.0	164.9	11.6	944.7	755.8	56	77.30
337.9	189.0	0.0	174.9	9.5	944.7	755.8	56	59.89
374.0	189.2	0.0	170.1	10.1	926.1	756.7	91	64.90
313.3	262.2	0.0	175.5	8.6	1046.9	611.8	91	66.60
425.0	106.3	0.0	153.5	16.5	852.1	887.1	91	65.20
425.0	106.3	0.0	151.4	18.6	936.0	803.7	91	66.70
375.0	93.8	0.0	126.6	23.4	852.1	992.6	91	62.50
475.0	118.8	0.0	181.1	8.9	852.1	781.5	91	74.19
469.0	117.2	0.0	137.8	32.2	852.1	840.5	91	70.70
425.0	106.3	0.0	153.5	16.5	852.1	887.1	91	65.20
388.6	97.1	0.0	157.9	12.1	852.1	925.7	91	57.60
531.3	0.0	0.0	141.8	28.2	852.1	893.7	91	59.20
425.0	106.3	0.0	153.5	16.5	852.1	887.1	91	65.20
318.8	212.5	0.0	155.7	14.3	852.1	880.4	91	68.10
401.8	94.7	0.0	147.4	11.4	946.8	852.1	91	75.50
362.6	189.0	0.0	164.9	11.6	944.7	755.8	91	79.30
379.5	151.2	0.0	153.9	15.9	1134.3	605.0	91	56.50
362.6	189.0	0.0	164.9	11.6	944.7	755.8	91	79.30
286.3	200.9	0.0	144.7	11.2	1004.6	803.7	91	76.80
362.6	189.0	0.0	164.9	11.6	944.7	755.8	91	79.30
439.0	177.0	0.0	186.0	11.1	884.9	707.9	91	73.30
389.9	189.0	0.0	145.9	22.0	944.7	755.8	91	82.60
362.6	189.0	0.0	164.9	11.6	944.7	755.8	91	79.30
337.9	189.0	0.0	174.9	9.5	944.7	755.8	91	67.80
222.4	0.0	96.7	189.3	4.5	967.1	870.3	3	11.58
222.4	0.0	96.7	189.3	4.5	967.1	870.3	14	24.45
222.4	0.0	96.7	189.3	4.5	967.1	870.3	28	24.89
222.4	0.0	96.7	189.3	4.5	967.1	870.3	56	29.45
222.4	0.0	96.7	189.3	4.5	967.1	870.3	100	40.71
233.8	0.0	94.6	197.9	4.6	947.0	852.2	3	10.38
233.8	0.0	94.6	197.9	4.6	947.0	852.2	14	22.14
233.8	0.0	94.6	197.9	4.6	947.0	852.2	28	22.84
233.8	0.0	94.6	197.9	4.6	947.0	852.2	56	27.66
233.8	0.0	94.6	197.9	4.6	947.0	852.2	100	34.56
194.7	0.0	100.5	165.6	7.5	1006.4	905.9	3	12.45
194.7	0.0	100.5	165.6	7.5	1006.4	905.9	14	24.99
194.7	0.0	100.5	165.6	7.5	1006.4	905.9	28	25.72
194.7	0.0	100.5	165.6	7.5	1006.4	905.9	56	33.96
194.7	0.0	100.5	165.6	7.5	1006.4	905.9	100	37.34
190.7	0.0	125.4	162.1	7.8	1090.0	804.0	3	15.04
190.7	0.0	125.4	162.1	7.8	1090.0	804.0	14	21.06
190.7	0.0	125.4	162.1	7.8	1090.0	804.0	28	26.40
190.7	0.0	125.4	162.1	7.8	1090.0	804.0	56	35.34
190.7	0.0	125.4	162.1	7.8	1090.0	804.0	100	40.57
212.1	0.0	121.6	180.3	5.7	1057.6	779.3	3	12.47
212.1	0.0	121.6	180.3	5.7	1057.6	779.3	14	20.92
212.1	0.0	121.6	180.3	5.7	1057.6	779.3	28	24.90
212.1	0.0	121.6	180.3	5.7	1057.6	779.3	56	34.20
212.1	0.0	121.6	180.3	5.7	1057.6	779.3	100	39.61
230.0	0.0	118.3	195.5	4.6	1029.4	758.6	3	10.03
230.0	0.0	118.3	195.5	4.6	1029.4	758.6	14	20.08
230.0	0.0	118.3	195.5	4.6	1029.4	758.6	28	24.48
230.0	0.0	118.3	195.5	4.6	1029.4	758.6	56	31.54
230.0	0.0	118.3	195.5	4.6	1029.4	758.6	100	35.34
190.3	0.0	125.2	161.9	9.9	1088.1	802.6	3	9.45
190.3	0.0	125.2	161.9	9.9	1088.1	802.6	14	22.72
190.3	0.0	125.2	161.9	9.9	1088.1	802.6	28	28.47
190.3	0.0	125.2	161.9	9.9	1088.1	802.6	56	38.56
190.3	0.0	125.2	161.9	9.9	1088.1	802.6	100	40.39
166.1	0.0	163.3	176.5	4.5	1058.6	780.1	3	10.76
166.1	0.0	163.3	176.5	4.5	1058.6	780.1	14	25.48
166.1	0.0	163.3	176.5	4.5	1058.6	780.1	28	21.54
166.1	0.0	163.3	176.5	4.5	1058.6	780.1	56	28.63
166.1	0.0	163.3	176.5	4.5	1058.6	780.1	100	33.54
168.0	42.1	163.8	121.8	5.7	1058.7	780.1	3	7.75
168.0	42.1	163.8	121.8	5.7	1058.7	780.1	14	17.82
168.0	42.1	163.8	121.8	5.7	1058.7	780.1	28	24.24
168.0	42.1	163.8	121.8	5.7	1058.7	780.1	56	32.85
168.0	42.1	163.8	121.8	5.7	1058.7	780.1	100	39.23
213.7	98.1	24.5	181.7	6.9	1065.8	785.4	3	18.00
213.7	98.1	24.5	181.7	6.9	1065.8	785.4	14	30.39
213.7	98.1	24.5	181.7	6.9	1065.8	785.4	28	45.71
213.7	98.1	24.5	181.7	6.9	1065.8	785.4	56	50.77
213.7	98.1	24.5	181.7	6.9	1065.8	785.4	100	53.90
213.8	98.1	24.5	181.7	6.7	1066.0	785.5	3	13.18
213.8	98.1	24.5	181.7	6.7	1066.0	785.5	14	17.84
213.8	98.1	24.5	181.7	6.7	1066.0	785.5	28	40.23
213.8	98.1	24.5	181.7	6.7	1066.0	785.5	56	47.13
213.8	98.1	24.5	181.7	6.7	1066.0	785.5	100	49.97
229.7	0.0	118.2	195.2	6.1	1028.1	757.6	3	13.36
229.7	0.0	118.2	195.2	6.1	1028.1	757.6	14	22.32
229.7	0.0	118.2	195.2	6.1	1028.1	757.6	28	24.54
229.7	0.0	118.2	195.2	6.1	1028.1	757.6	56	31.35
229.7	0.0	118.2	195.2	6.1	1028.1	757.6	100	40.86
238.1	0.0	94.1	186.7	7.0	949.9	847.0	3	19.93
238.1	0.0	94.1	186.7	7.0	949.9	847.0	14	25.69
238.1	0.0	94.1	186.7	7.0	949.9	847.0	28	30.23
238.1	0.0	94.1	186.7	7.0	949.9	847.0	56	39.59
238.1	0.0	94.1	186.7	7.0	949.9	847.0	100	44.30
250.0	0.0	95.7	187.4	5.5	956.9	861.2	3	13.82
250.0	0.0	95.7	187.4	5.5	956.9	861.2	14	24.92
250.0	0.0	95.7	187.4	5.5	956.9	861.2	28	29.22
250.0	0.0	95.7	187.4	5.5	956.9	861.2	56	38.33
250.0	0.0	95.7	187.4	5.5	956.9	861.2	100	42.35
212.5	0.0	100.4	159.3	8.7	1007.8	903.6	3	13.54
212.5	0.0	100.4	159.3	8.7	1007.8	903.6	14	26.31
212.5	0.0	100.4	159.3	8.7	1007.8	903.6	28	31.64
212.5	0.0	100.4	159.3	8.7	1007.8	903.6	56	42.55
212.5	0.0	100.4	159.3	8.7	1007.8	903.6	100	42.92
212.6	0.0	100.4	159.4	10.4	1003.8	903.8	3	13.33
212.6	0.0	100.4	159.4	10.4	1003.8	903.8	14	25.37
212.6	0.0	100.4	159.4	10.4	1003.8	903.8	28	37.40
212.6	0.0	100.4	159.4	10.4	1003.8	903.8	56	44.40
212.6	0.0	100.4	159.4	10.4	1003.8	903.8	100	47.74
212.0	0.0	124.8	159.0	7.8	1085.4	799.5	3	19.52
212.0	0.0	124.8	159.0	7.8	1085.4	799.5	14	31.35
212.0	0.0	124.8	159.0	7.8	1085.4	799.5	28	38.50
212.0	0.0	124.8	159.0	7.8	1085.4	799.5	56	45.08
212.0	0.0	124.8	159.0	7.8	1085.4	799.5	100	47.82
231.8	0.0	121.6	174.0	6.7	1056.4	778.5	3	15.44
231.8	0.0	121.6	174.0	6.7	1056.4	778.5	14	26.77
231.8	0.0	121.6	174.0	6.7	1056.4	778.5	28	33.73
231.8	0.0	121.6	174.0	6.7	1056.4	778.5	56	42.70
231.8	0.0	121.6	174.0	6.7	1056.4	778.5	100	45.84
251.4	0.0	118.3	188.5	5.8	1028.4	757.7	3	17.22
251.4	0.0	118.3	188.5	5.8	1028.4	757.7	14	29.93
251.4	0.0	118.3	188.5	5.8	1028.4	757.7	28	29.65
251.4	0.0	118.3	188.5	5.8	1028.4	757.7	56	36.97
251.4	0.0	118.3	188.5	5.8	1028.4	757.7	100	43.58
251.4	0.0	118.3	188.5	6.4	1028.4	757.7	3	13.12
251.4	0.0	118.3	188.5	6.4	1028.4	757.7	14	24.43
251.4	0.0	118.3	188.5	6.4	1028.4	757.7	28	32.66
251.4	0.0	118.3	188.5	6.4	1028.4	757.7	56	36.64
251.4	0.0	118.3	188.5	6.4	1028.4	757.7	100	44.21
181.4	0.0	167.0	169.6	7.6	1055.6	777.8	3	13.62
181.4	0.0	167.0	169.6	7.6	1055.6	777.8	14	21.60
181.4	0.0	167.0	169.6	7.6	1055.6	777.8	28	27.77
181.4	0.0	167.0	169.6	7.6	1055.6	777.8	56	35.57
181.4	0.0	167.0	169.6	7.6	1055.6	777.8	100	45.37
182.0	45.2	122.0	170.2	8.2	1059.4	780.7	3	7.32
182.0	45.2	122.0	170.2	8.2	1059.4	780.7	14	21.50
182.0	45.2	122.0	170.2	8.2	1059.4	780.7	28	31.27
182.0	45.2	122.0	170.2	8.2	1059.4	780.7	56	43.50
182.0	45.2	122.0	170.2	8.2	1059.4	780.7	100	48.67
168.9	42.2	124.3	158.3	10.8	1080.8	796.2	3	7.40
168.9	42.2	124.3	158.3	10.8	1080.8	796.2	14	23.51
168.9	42.2	124.3	158.3	10.8	1080.8	796.2	28	31.12
168.9	42.2	124.3	158.3	10.8	1080.8	796.2	56	39.15
168.9	42.2	124.3	158.3	10.8	1080.8	796.2	100	48.15
290.4	0.0	96.2	168.1	9.4	961.2	865.0	3	22.50
290.4	0.0	96.2	168.1	9.4	961.2	865.0	14	34.67
290.4	0.0	96.2	168.1	9.4	961.2	865.0	28	34.74
290.4	0.0	96.2	168.1	9.4	961.2	865.0	56	45.08
290.4	0.0	96.2	168.1	9.4	961.2	865.0	100	48.97
277.1	0.0	97.4	160.6	11.8	973.9	875.6	3	23.14
277.1	0.0	97.4	160.6	11.8	973.9	875.6	14	41.89
277.1	0.0	97.4	160.6	11.8	973.9	875.6	28	48.28
277.1	0.0	97.4	160.6	11.8	973.9	875.6	56	51.04
277.1	0.0	97.4	160.6	11.8	973.9	875.6	100	55.64
295.7	0.0	95.6	171.5	8.9	955.1	859.2	3	22.95
295.7	0.0	95.6	171.5	8.9	955.1	859.2	14	35.23
295.7	0.0	95.6	171.5	8.9	955.1	859.2	28	39.94
295.7	0.0	95.6	171.5	8.9	955.1	859.2	56	48.72
295.7	0.0	95.6	171.5	8.9	955.1	859.2	100	52.04
251.8	0.0	99.9	146.1	12.4	1006.0	899.8	3	21.02
251.8	0.0	99.9	146.1	12.4	1006.0	899.8	14	33.36
251.8	0.0	99.9	146.1	12.4	1006.0	899.8	28	33.94
251.8	0.0	99.9	146.1	12.4	1006.0	899.8	56	44.14
251.8	0.0	99.9	146.1	12.4	1006.0	899.8	100	45.37
249.1	0.0	98.8	158.1	12.8	987.8	889.0	3	15.36
249.1	0.0	98.8	158.1	12.8	987.8	889.0	14	28.68
249.1	0.0	98.8	158.1	12.8	987.8	889.0	28	30.85
249.1	0.0	98.8	158.1	12.8	987.8	889.0	56	42.03
249.1	0.0	98.8	158.1	12.8	987.8	889.0	100	51.06
252.3	0.0	98.8	146.3	14.2	987.8	889.0	3	21.78
252.3	0.0	98.8	146.3	14.2	987.8	889.0	14	42.29
252.3	0.0	98.8	146.3	14.2	987.8	889.0	28	50.60
252.3	0.0	98.8	146.3	14.2	987.8	889.0	56	55.83
252.3	0.0	98.8	146.3	14.2	987.8	889.0	100	60.95
246.8	0.0	125.1	143.3	12.0	1086.8	800.9	3	23.52
246.8	0.0	125.1	143.3	12.0	1086.8	800.9	14	42.22
246.8	0.0	125.1	143.3	12.0	1086.8	800.9	28	52.50
246.8	0.0	125.1	143.3	12.0	1086.8	800.9	56	60.32
246.8	0.0	125.1	143.3	12.0	1086.8	800.9	100	66.42
275.1	0.0	121.4	159.5	9.9	1053.6	777.5	3	23.80
275.1	0.0	121.4	159.5	9.9	1053.6	777.5	14	38.77
275.1	0.0	121.4	159.5	9.9	1053.6	777.5	28	51.33
275.1	0.0	121.4	159.5	9.9	1053.6	777.5	56	56.85
275.1	0.0	121.4	159.5	9.9	1053.6	777.5	100	58.61
297.2	0.0	117.5	174.8	9.5	1022.8	753.5	3	21.91
297.2	0.0	117.5	174.8	9.5	1022.8	753.5	14	36.99
297.2	0.0	117.5	174.8	9.5	1022.8	753.5	28	47.40
297.2	0.0	117.5	174.8	9.5	1022.8	753.5	56	51.96
297.2	0.0	117.5	174.8	9.5	1022.8	753.5	100	56.74
213.7	0.0	174.7	154.8	10.2	1053.5	776.4	3	17.57
213.7	0.0	174.7	154.8	10.2	1053.5	776.4	14	33.73
213.7	0.0	174.7	154.8	10.2	1053.5	776.4	28	40.15
213.7	0.0	174.7	154.8	10.2	1053.5	776.4	56	46.64
213.7	0.0	174.7	154.8	10.2	1053.5	776.4	100	50.08
213.5	0.0	174.2	154.6	11.7	1052.3	775.5	3	17.37
213.5	0.0	174.2	154.6	11.7	1052.3	775.5	14	33.70
213.5	0.0	174.2	154.6	11.7	1052.3	775.5	28	45.94
213.5	0.0	174.2	154.6	11.7	1052.3	775.5	56	51.43
213.5	0.0	174.2	154.6	11.7	1052.3	775.5	100	59.30
277.2	97.8	24.5	160.7	11.2	1061.7	782.5	3	30.45
277.2	97.8	24.5	160.7	11.2	1061.7	782.5	14	47.71
277.2	97.8	24.5	160.7	11.2	1061.7	782.5	28	63.14
277.2	97.8	24.5	160.7	11.2	1061.7	782.5	56	66.82
277.2	97.8	24.5	160.7	11.2	1061.7	782.5	100	66.95
218.2	54.6	123.8	140.8	11.9	1075.7	792.7	3	27.42
218.2	54.6	123.8	140.8	11.9	1075.7	792.7	14	35.96
218.2	54.6	123.8	140.8	11.9	1075.7	792.7	28	55.51
218.2	54.6	123.8	140.8	11.9	1075.7	792.7	56	61.99
218.2	54.6	123.8	140.8	11.9	1075.7	792.7	100	63.53
214.9	53.8	121.9	155.6	9.6	1014.3	780.6	3	18.02
214.9	53.8	121.9	155.6	9.6	1014.3	780.6	14	38.60
214.9	53.8	121.9	155.6	9.6	1014.3	780.6	28	52.20
214.9	53.8	121.9	155.6	9.6	1014.3	780.6	56	53.96
214.9	53.8	121.9	155.6	9.6	1014.3	780.6	100	56.63
218.9	0.0	124.1	158.5	11.3	1078.7	794.9	3	15.34
218.9	0.0	124.1	158.5	11.3	1078.7	794.9	14	26.05
218.9	0.0	124.1	158.5	11.3	1078.7	794.9	28	30.22
218.9	0.0	124.1	158.5	11.3	1078.7	794.9	56	37.27
218.9	0.0	124.1	158.5	11.3	1078.7	794.9	100	46.23
376.0	0.0	0.0	214.6	0.0	1003.5	762.4	3	16.28
376.0	0.0	0.0	214.6	0.0	1003.5	762.4	14	25.62
376.0	0.0	0.0	214.6	0.0	1003.5	762.4	28	31.97
376.0	0.0	0.0	214.6	0.0	1003.5	762.4	56	36.30
376.0	0.0	0.0	214.6	0.0	1003.5	762.4	100	43.06
500.0	0.0	0.0	140.0	4.0	966.0	853.0	28	67.57
475.0	0.0	59.0	142.0	1.9	1098.0	641.0	28	57.23
315.0	137.0	0.0	145.0	5.9	1130.0	745.0	28	81.75
505.0	0.0	60.0	195.0	0.0	1030.0	630.0	28	64.02
451.0	0.0	0.0	165.0	11.3	1030.0	745.0	28	78.80
516.0	0.0	0.0	162.0	8.2	801.0	802.0	28	41.37
520.0	0.0	0.0	170.0	5.2	855.0	855.0	28	60.28
528.0	0.0	0.0	185.0	6.9	920.0	720.0	28	56.83
520.0	0.0	0.0	175.0	5.2	870.0	805.0	28	51.02
385.0	0.0	136.0	158.0	20.0	903.0	768.0	28	55.55
500.1	0.0	0.0	200.0	3.0	1124.4	613.2	28	44.13
450.1	50.0	0.0	200.0	3.0	1124.4	613.2	28	39.38
397.0	17.2	158.0	167.0	20.8	967.0	633.0	28	55.65
333.0	17.5	163.0	167.0	17.9	996.0	652.0	28	47.28
334.0	17.6	158.0	189.0	15.3	967.0	633.0	28	44.33
405.0	0.0	0.0	175.0	0.0	1120.0	695.0	28	52.30
200.0	200.0	0.0	190.0	0.0	1145.0	660.0	28	49.25
516.0	0.0	0.0	162.0	8.3	801.0	802.0	28	41.37
145.0	116.0	119.0	184.0	5.7	833.0	880.0	28	29.16
160.0	128.0	122.0	182.0	6.4	824.0	879.0	28	39.40
234.0	156.0	0.0	189.0	5.9	981.0	760.0	28	39.30
250.0	180.0	95.0	159.0	9.5	860.0	800.0	28	67.87
475.0	0.0	0.0	162.0	9.5	1044.0	662.0	28	58.52
285.0	190.0	0.0	163.0	7.6	1031.0	685.0	28	53.58
356.0	119.0	0.0	160.0	9.0	1061.0	657.0	28	59.00
275.0	180.0	120.0	162.0	10.4	830.0	765.0	28	76.24
500.0	0.0	0.0	151.0	9.0	1033.0	655.0	28	69.84
165.0	0.0	143.6	163.8	0.0	1005.6	900.9	3	14.40
165.0	128.5	132.1	175.1	8.1	1005.8	746.6	3	19.42
178.0	129.8	118.6	179.9	3.6	1007.3	746.8	3	20.73
167.4	129.9	128.6	175.5	7.8	1006.3	746.6	3	14.94
172.4	13.6	172.4	156.8	4.1	1006.3	856.4	3	21.29
173.5	50.1	173.5	164.8	6.5	1006.2	793.5	3	23.08
167.0	75.4	167.0	164.0	7.9	1007.3	770.1	3	15.52
173.8	93.4	159.9	172.3	9.7	1007.2	746.6	3	15.82
190.3	0.0	125.2	166.6	9.9	1079.0	798.9	3	12.55
250.0	0.0	95.7	191.8	5.3	948.9	857.2	3	8.49
213.5	0.0	174.2	159.2	11.7	1043.6	771.9	3	15.61
194.7	0.0	100.5	170.2	7.5	998.0	901.8	3	12.18
251.4	0.0	118.3	192.9	5.8	1043.6	754.3	3	11.98
165.0	0.0	143.6	163.8	0.0	1005.6	900.9	14	16.88
165.0	128.5	132.1	175.1	8.1	1005.8	746.6	14	33.09
178.0	129.8	118.6	179.9	3.6	1007.3	746.8	14	34.24
167.4	129.9	128.6	175.5	7.8	1006.3	746.6	14	31.81
172.4	13.6	172.4	156.8	4.1	1006.3	856.4	14	29.75
173.5	50.1	173.5	164.8	6.5	1006.2	793.5	14	33.01
167.0	75.4	167.0	164.0	7.9	1007.3	770.1	14	32.90
173.8	93.4	159.9	172.3	9.7	1007.2	746.6	14	29.55
190.3	0.0	125.2	166.6	9.9	1079.0	798.9	14	19.42
250.0	0.0	95.7	191.8	5.3	948.9	857.2	14	24.66
213.5	0.0	174.2	159.2	11.7	1043.6	771.9	14	29.59
194.7	0.0	100.5	170.2	7.5	998.0	901.8	14	24.28
251.4	0.0	118.3	192.9	5.8	1043.6	754.3	14	20.73
165.0	0.0	143.6	163.8	0.0	1005.6	900.9	28	26.20
165.0	128.5	132.1	175.1	8.1	1005.8	746.6	28	46.39
178.0	129.8	118.6	179.9	3.6	1007.3	746.8	28	39.16
167.4	129.9	128.6	175.5	7.8	1006.3	746.6	28	41.20
172.4	13.6	172.4	156.8	4.1	1006.3	856.4	28	33.69
173.5	50.1	173.5	164.8	6.5	1006.2	793.5	28	38.20
167.0	75.4	167.0	164.0	7.9	1007.3	770.1	28	41.41
173.8	93.4	159.9	172.3	9.7	1007.2	746.6	28	37.81
190.3	0.0	125.2	166.6	9.9	1079.0	798.9	28	24.85
250.0	0.0	95.7	191.8	5.3	948.9	857.2	28	27.22
213.5	0.0	174.2	159.2	11.7	1043.6	771.9	28	44.64
194.7	0.0	100.5	170.2	7.5	998.0	901.8	28	37.27
251.4	0.0	118.3	192.9	5.8	1043.6	754.3	28	33.27
165.0	0.0	143.6	163.8	0.0	1005.6	900.9	56	36.56
165.0	128.5	132.1	175.1	8.1	1005.8	746.6	56	53.72
178.0	129.8	118.6	179.9	3.6	1007.3	746.8	56	48.59
167.4	129.9	128.6	175.5	7.8	1006.3	746.6	56	51.72
172.4	13.6	172.4	156.8	4.1	1006.3	856.4	56	35.85
173.5	50.1	173.5	164.8	6.5	1006.2	793.5	56	53.77
167.0	75.4	167.0	164.0	7.9	1007.3	770.1	56	53.46
173.8	93.4	159.9	172.3	9.7	1007.2	746.6	56	48.99
190.3	0.0	125.2	166.6	9.9	1079.0	798.9	56	31.72
250.0	0.0	95.7	191.8	5.3	948.9	857.2	56	39.64
213.5	0.0	174.2	159.2	11.7	1043.6	771.9	56	51.26
194.7	0.0	100.5	170.2	7.5	998.0	901.8	56	43.39
251.4	0.0	118.3	192.9	5.8	1043.6	754.3	56	39.27
165.0	0.0	143.6	163.8	0.0	1005.6	900.9	100	37.96
165.0	128.5	132.1	175.1	8.1	1005.8	746.6	100	55.02
178.0	129.8	118.6	179.9	3.6	1007.3	746.8	100	49.99
167.4	129.9	128.6	175.5	7.8	1006.3	746.6	100	53.66
172.4	13.6	172.4	156.8	4.1	1006.3	856.4	100	37.68
173.5	50.1	173.5	164.8	6.5	1006.2	793.5	100	56.06
167.0	75.4	167.0	164.0	7.9	1007.3	770.1	100	56.81
173.8	93.4	159.9	172.3	9.7	1007.2	746.6	100	50.94
190.3	0.0	125.2	166.6	9.9	1079.0	798.9	100	33.56
250.0	0.0	95.7	191.8	5.3	948.9	857.2	100	41.16
213.5	0.0	174.2	159.2	11.7	1043.6	771.9	100	52.96
194.7	0.0	100.5	170.2	7.5	998.0	901.8	100	44.28
251.4	0.0	118.3	192.9	5.8	1043.6	754.3	100	40.15
446.0	24.0	79.0	162.0	11.6	967.0	712.0	28	57.03
446.0	24.0	79.0	162.0	11.6	967.0	712.0	28	44.42
446.0	24.0	79.0	162.0	11.6	967.0	712.0	28	51.02
446.0	24.0	79.0	162.0	10.3	967.0	712.0	28	53.39
446.0	24.0	79.0	162.0	11.6	967.0	712.0	3	35.36
446.0	24.0	79.0	162.0	11.6	967.0	712.0	3	25.02
446.0	24.0	79.0	162.0	11.6	967.0	712.0	3	23.35
446.0	24.0	79.0	162.0	11.6	967.0	712.0	7	52.01
446.0	24.0	79.0	162.0	11.6	967.0	712.0	7	38.02
446.0	24.0	79.0	162.0	11.6	967.0	712.0	7	39.30
446.0	24.0	79.0	162.0	11.6	967.0	712.0	56	61.07
446.0	24.0	79.0	162.0	11.6	967.0	712.0	56	56.14
446.0	24.0	79.0	162.0	11.6	967.0	712.0	56	55.25
446.0	24.0	79.0	162.0	10.3	967.0	712.0	56	54.77
387.0	20.0	94.0	157.0	14.3	938.0	845.0	28	50.24
387.0	20.0	94.0	157.0	13.9	938.0	845.0	28	46.68
387.0	20.0	94.0	157.0	11.6	938.0	845.0	28	46.68
387.0	20.0	94.0	157.0	14.3	938.0	845.0	3	22.75
387.0	20.0	94.0	157.0	13.9	938.0	845.0	3	25.51
387.0	20.0	94.0	157.0	11.6	938.0	845.0	3	34.77
387.0	20.0	94.0	157.0	14.3	938.0	845.0	7	36.84
387.0	20.0	94.0	157.0	13.9	938.0	845.0	7	45.90
387.0	20.0	94.0	157.0	11.6	938.0	845.0	7	41.67
387.0	20.0	94.0	157.0	14.3	938.0	845.0	56	56.34
387.0	20.0	94.0	157.0	13.9	938.0	845.0	56	47.97
387.0	20.0	94.0	157.0	11.6	938.0	845.0	56	61.46
355.0	19.0	97.0	145.0	13.1	967.0	871.0	28	44.03
355.0	19.0	97.0	145.0	12.3	967.0	871.0	28	55.45
491.0	26.0	123.0	210.0	3.9	882.0	699.0	28	55.55
491.0	26.0	123.0	201.0	3.9	822.0	699.0	28	57.92
491.0	26.0	123.0	210.0	3.9	882.0	699.0	3	25.61
491.0	26.0	123.0	210.0	3.9	882.0	699.0	7	33.49
491.0	26.0	123.0	210.0	3.9	882.0	699.0	56	59.59
491.0	26.0	123.0	201.0	3.9	822.0	699.0	3	29.55
491.0	26.0	123.0	201.0	3.9	822.0	699.0	7	37.92
491.0	26.0	123.0	201.0	3.9	822.0	699.0	56	61.86
424.0	22.0	132.0	178.0	8.5	822.0	750.0	28	62.05
424.0	22.0	132.0	178.0	8.5	882.0	750.0	3	32.01
424.0	22.0	132.0	168.0	8.9	822.0	750.0	28	72.10
424.0	22.0	132.0	178.0	8.5	822.0	750.0	7	39.00
424.0	22.0	132.0	178.0	8.5	822.0	750.0	56	65.70
424.0	22.0	132.0	168.0	8.9	822.0	750.0	3	32.11
424.0	22.0	132.0	168.0	8.9	822.0	750.0	7	40.29
424.0	22.0	132.0	168.0	8.9	822.0	750.0	56	74.36
202.0	11.0	141.0	206.0	1.7	942.0	801.0	28	21.97
202.0	11.0	141.0	206.0	1.7	942.0	801.0	3	9.85
202.0	11.0	141.0	206.0	1.7	942.0	801.0	7	15.07
202.0	11.0	141.0	206.0	1.7	942.0	801.0	56	23.25
284.0	15.0	141.0	179.0	5.5	842.0	801.0	28	43.73
284.0	15.0	141.0	179.0	5.5	842.0	801.0	3	13.40
284.0	15.0	141.0	179.0	5.5	842.0	801.0	7	24.13
284.0	15.0	141.0	179.0	5.5	842.0	801.0	56	44.52
359.0	19.0	141.0	154.0	10.9	942.0	801.0	28	62.94
359.0	19.0	141.0	154.0	10.9	942.0	801.0	28	59.49
359.0	19.0	141.0	154.0	10.9	942.0	801.0	3	25.12
359.0	19.0	141.0	154.0	10.9	942.0	801.0	3	23.64
359.0	19.0	141.0	154.0	10.9	942.0	801.0	7	35.75
359.0	19.0	141.0	154.0	10.9	942.0	801.0	7	38.61
359.0	19.0	141.0	154.0	10.9	942.0	801.0	56	68.75
359.0	19.0	141.0	154.0	10.9	942.0	801.0	56	66.78
436.0	0.0	0.0	218.0	0.0	838.4	719.7	28	23.85
289.0	0.0	0.0	192.0	0.0	913.2	895.3	90	32.07
289.0	0.0	0.0	192.0	0.0	913.2	895.3	3	11.65
393.0	0.0	0.0	192.0	0.0	940.6	785.6	3	19.20
393.0	0.0	0.0	192.0	0.0	940.6	785.6	90	48.85
393.0	0.0	0.0	192.0	0.0	940.6	785.6	28	39.60
480.0	0.0	0.0	192.0	0.0	936.2	712.2	28	43.94
480.0	0.0	0.0	192.0	0.0	936.2	712.2	7	34.57
480.0	0.0	0.0	192.0	0.0	936.2	712.2	90	54.32
480.0	0.0	0.0	192.0	0.0	936.2	712.2	3	24.40
333.0	0.0	0.0	192.0	0.0	931.2	842.6	3	15.62
255.0	0.0	0.0	192.0	0.0	889.8	945.0	90	21.86
255.0	0.0	0.0	192.0	0.0	889.8	945.0	7	10.22
289.0	0.0	0.0	192.0	0.0	913.2	895.3	7	14.60
255.0	0.0	0.0	192.0	0.0	889.8	945.0	28	18.75
333.0	0.0	0.0	192.0	0.0	931.2	842.6	28	31.97
333.0	0.0	0.0	192.0	0.0	931.2	842.6	7	23.40
289.0	0.0	0.0	192.0	0.0	913.2	895.3	28	25.57
333.0	0.0	0.0	192.0	0.0	931.2	842.6	90	41.68
393.0	0.0	0.0	192.0	0.0	940.6	785.6	7	27.74
255.0	0.0	0.0	192.0	0.0	889.8	945.0	3	8.20
158.8	238.2	0.0	185.7	0.0	1040.6	734.3	7	9.62
239.6	359.4	0.0	185.7	0.0	941.6	664.3	7	25.42
238.2	158.8	0.0	185.7	0.0	1040.6	734.3	7	15.69
181.9	272.8	0.0	185.7	0.0	1012.4	714.3	28	27.94
193.5	290.2	0.0	185.7	0.0	998.2	704.3	28	32.63
255.5	170.3	0.0	185.7	0.0	1026.6	724.3	7	17.24
272.8	181.9	0.0	185.7	0.0	1012.4	714.3	7	19.77
239.6	359.4	0.0	185.7	0.0	941.6	664.3	28	39.44
220.8	147.2	0.0	185.7	0.0	1055.0	744.3	28	25.75
397.0	0.0	0.0	185.7	0.0	1040.6	734.3	28	33.08
382.5	0.0	0.0	185.7	0.0	1047.8	739.3	7	24.07
210.7	316.1	0.0	185.7	0.0	977.0	689.3	7	21.82
158.8	238.2	0.0	185.7	0.0	1040.6	734.3	28	21.07
295.8	0.0	0.0	185.7	0.0	1091.4	769.3	7	14.84
255.5	170.3	0.0	185.7	0.0	1026.6	724.3	28	32.05
203.5	135.7	0.0	185.7	0.0	1076.2	759.3	7	11.96
397.0	0.0	0.0	185.7	0.0	1040.6	734.3	7	25.45
381.4	0.0	0.0	185.7	0.0	1104.6	784.3	28	22.49
295.8	0.0	0.0	185.7	0.0	1091.4	769.3	28	25.22
228.0	342.1	0.0	185.7	0.0	955.8	674.3	28	39.70
220.8	147.2	0.0	185.7	0.0	1055.0	744.3	7	13.09
316.1	210.7	0.0	185.7	0.0	977.0	689.3	28	38.70
135.7	203.5	0.0	185.7	0.0	1076.2	759.3	7	7.51
238.1	0.0	0.0	185.7	0.0	1118.8	789.3	28	17.58
339.2	0.0	0.0	185.7	0.0	1069.2	754.3	7	21.18
135.7	203.5	0.0	185.7	0.0	1076.2	759.3	28	18.20
193.5	290.2	0.0	185.7	0.0	998.2	704.3	7	17.20
203.5	135.7	0.0	185.7	0.0	1076.2	759.3	28	22.63
290.2	193.5	0.0	185.7	0.0	998.2	704.3	7	21.86
181.9	272.8	0.0	185.7	0.0	1012.4	714.3	7	12.37
170.3	155.5	0.0	185.7	0.0	1026.6	724.3	28	25.73
210.7	316.1	0.0	185.7	0.0	977.0	689.3	28	37.81
228.0	342.1	0.0	185.7	0.0	955.8	674.3	7	21.92
290.2	193.5	0.0	185.7	0.0	998.2	704.3	28	33.04
381.4	0.0	0.0	185.7	0.0	1104.6	784.3	7	14.54
238.2	158.8	0.0	185.7	0.0	1040.6	734.3	28	26.91
186.2	124.1	0.0	185.7	0.0	1083.4	764.3	7	8.00
339.2	0.0	0.0	185.7	0.0	1069.2	754.3	28	31.90
238.1	0.0	0.0	185.7	0.0	1118.8	789.3	7	10.34
252.5	0.0	0.0	185.7	0.0	1111.6	784.3	28	19.77
382.5	0.0	0.0	185.7	0.0	1047.8	739.3	28	37.44
252.5	0.0	0.0	185.7	0.0	1111.6	784.3	7	11.48
316.1	210.7	0.0	185.7	0.0	977.0	689.3	7	24.44
186.2	124.1	0.0	185.7	0.0	1083.4	764.3	28	17.60
170.3	155.5	0.0	185.7	0.0	1026.6	724.3	7	10.73
272.8	181.9	0.0	185.7	0.0	1012.4	714.3	28	31.38
339.0	0.0	0.0	197.0	0.0	968.0	781.0	3	13.22
339.0	0.0	0.0	197.0	0.0	968.0	781.0	7	20.97
339.0	0.0	0.0	197.0	0.0	968.0	781.0	14	27.04
339.0	0.0	0.0	197.0	0.0	968.0	781.0	28	32.04
339.0	0.0	0.0	197.0	0.0	968.0	781.0	90	35.17
339.0	0.0	0.0	197.0	0.0	968.0	781.0	180	36.45
339.0	0.0	0.0	197.0	0.0	968.0	781.0	365	38.89
236.0	0.0	0.0	194.0	0.0	968.0	885.0	3	6.47
236.0	0.0	0.0	194.0	0.0	968.0	885.0	14	12.84
236.0	0.0	0.0	194.0	0.0	968.0	885.0	28	18.42
236.0	0.0	0.0	194.0	0.0	968.0	885.0	90	21.95
236.0	0.0	0.0	193.0	0.0	968.0	885.0	180	24.10
236.0	0.0	0.0	193.0	0.0	968.0	885.0	365	25.08
277.0	0.0	0.0	191.0	0.0	968.0	856.0	14	21.26
277.0	0.0	0.0	191.0	0.0	968.0	856.0	28	25.97
277.0	0.0	0.0	191.0	0.0	968.0	856.0	3	11.36
277.0	0.0	0.0	191.0	0.0	968.0	856.0	90	31.25
277.0	0.0	0.0	191.0	0.0	968.0	856.0	180	32.33
277.0	0.0	0.0	191.0	0.0	968.0	856.0	360	33.70
254.0	0.0	0.0	198.0	0.0	968.0	863.0	3	9.31
254.0	0.0	0.0	198.0	0.0	968.0	863.0	90	26.94
254.0	0.0	0.0	198.0	0.0	968.0	863.0	180	27.63
254.0	0.0	0.0	198.0	0.0	968.0	863.0	365	29.79
307.0	0.0	0.0	193.0	0.0	968.0	812.0	180	34.49
307.0	0.0	0.0	193.0	0.0	968.0	812.0	365	36.15
307.0	0.0	0.0	193.0	0.0	968.0	812.0	3	12.54
307.0	0.0	0.0	193.0	0.0	968.0	812.0	28	27.53
307.0	0.0	0.0	193.0	0.0	968.0	812.0	90	32.92
236.0	0.0	0.0	193.0	0.0	968.0	885.0	7	9.99
200.0	0.0	0.0	180.0	0.0	1125.0	845.0	7	7.84
200.0	0.0	0.0	180.0	0.0	1125.0	845.0	28	12.25
225.0	0.0	0.0	181.0	0.0	1113.0	833.0	7	11.17
225.0	0.0	0.0	181.0	0.0	1113.0	833.0	28	17.34
325.0	0.0	0.0	184.0	0.0	1063.0	783.0	7	17.54
325.0	0.0	0.0	184.0	0.0	1063.0	783.0	28	30.57
275.0	0.0	0.0	183.0	0.0	1088.0	808.0	7	14.20
275.0	0.0	0.0	183.0	0.0	1088.0	808.0	28	24.50
300.0	0.0	0.0	184.0	0.0	1075.0	795.0	7	15.58
300.0	0.0	0.0	184.0	0.0	1075.0	795.0	28	26.85
375.0	0.0	0.0	186.0	0.0	1038.0	758.0	7	26.06
375.0	0.0	0.0	186.0	0.0	1038.0	758.0	28	38.21
400.0	0.0	0.0	187.0	0.0	1025.0	745.0	28	43.70
400.0	0.0	0.0	187.0	0.0	1025.0	745.0	7	30.14
250.0	0.0	0.0	182.0	0.0	1100.0	820.0	7	12.73
250.0	0.0	0.0	182.0	0.0	1100.0	820.0	28	20.87
350.0	0.0	0.0	186.0	0.0	1050.0	770.0	7	20.28
350.0	0.0	0.0	186.0	0.0	1050.0	770.0	28	34.29
203.5	305.3	0.0	203.5	0.0	963.4	630.0	7	19.54
250.2	166.8	0.0	203.5	0.0	977.6	694.1	90	47.71
157.0	236.0	0.0	192.0	0.0	935.4	781.2	90	43.38
141.3	212.0	0.0	203.5	0.0	971.8	748.5	28	29.89
166.8	250.2	0.0	203.5	0.0	975.6	692.6	3	6.90
122.6	183.9	0.0	203.5	0.0	958.2	800.1	90	33.19
183.9	122.6	0.0	203.5	0.0	959.2	800.0	3	4.90
102.0	153.0	0.0	192.0	0.0	887.0	942.0	3	4.57
102.0	153.0	0.0	192.0	0.0	887.0	942.0	90	25.46
122.6	183.9	0.0	203.5	0.0	958.2	800.1	28	24.29
166.8	250.2	0.0	203.5	0.0	975.6	692.6	28	33.95
200.0	133.0	0.0	192.0	0.0	965.4	806.2	3	11.41
108.3	162.4	0.0	203.5	0.0	938.2	849.0	28	20.59
305.3	203.5	0.0	203.5	0.0	965.4	631.0	7	25.89
108.3	162.4	0.0	203.5	0.0	938.2	849.0	90	29.23
116.0	173.0	0.0	192.0	0.0	909.8	891.9	90	31.02
141.3	212.0	0.0	203.5	0.0	971.8	748.5	7	10.39
157.0	236.0	0.0	192.0	0.0	935.4	781.2	28	33.66
133.0	200.0	0.0	192.0	0.0	927.4	839.2	28	27.87
250.2	166.8	0.0	203.5	0.0	977.6	694.1	7	19.35
173.0	116.0	0.0	192.0	0.0	946.8	856.8	7	11.39
192.0	288.0	0.0	192.0	0.0	929.8	716.1	3	12.79
192.0	288.0	0.0	192.0	0.0	929.8	716.1	28	39.32
153.0	102.0	0.0	192.0	0.0	888.0	943.1	3	4.78
288.0	192.0	0.0	192.0	0.0	932.0	717.8	3	16.11
305.3	203.5	0.0	203.5	0.0	965.4	631.0	28	43.38
236.0	157.0	0.0	192.0	0.0	972.6	749.1	7	20.42
173.0	116.0	0.0	192.0	0.0	946.8	856.8	3	6.94
212.0	141.3	0.0	203.5	0.0	973.4	750.0	7	15.03
236.0	157.0	0.0	192.0	0.0	972.6	749.1	3	13.57
183.9	122.6	0.0	203.5	0.0	959.2	800.0	90	32.53
166.8	250.2	0.0	203.5	0.0	975.6	692.6	7	15.75
102.0	153.0	0.0	192.0	0.0	887.0	942.0	7	7.68
288.0	192.0	0.0	192.0	0.0	932.0	717.8	28	38.80
212.0	141.3	0.0	203.5	0.0	973.4	750.0	28	33.00
102.0	153.0	0.0	192.0	0.0	887.0	942.0	28	17.28
173.0	116.0	0.0	192.0	0.0	946.8	856.8	28	24.28
183.9	122.6	0.0	203.5	0.0	959.2	800.0	28	24.05
133.0	200.0	0.0	192.0	0.0	927.4	839.2	90	36.59
192.0	288.0	0.0	192.0	0.0	929.8	716.1	90	50.73
133.0	200.0	0.0	192.0	0.0	927.4	839.2	7	13.66
305.3	203.5	0.0	203.5	0.0	965.4	631.0	3	14.14
236.0	157.0	0.0	192.0	0.0	972.6	749.1	90	47.78
108.3	162.4	0.0	203.5	0.0	938.2	849.0	3	2.33
157.0	236.0	0.0	192.0	0.0	935.4	781.2	7	16.89
288.0	192.0	0.0	192.0	0.0	932.0	717.8	7	23.52
212.0	141.3	0.0	203.5	0.0	973.4	750.0	3	6.81
212.0	141.3	0.0	203.5	0.0	973.4	750.0	90	39.70
153.0	102.0	0.0	192.0	0.0	888.0	943.1	28	17.96
236.0	157.0	0.0	192.0	0.0	972.6	749.1	28	32.88
116.0	173.0	0.0	192.0	0.0	909.8	891.9	28	22.35
183.9	122.6	0.0	203.5	0.0	959.2	800.0	7	10.79
108.3	162.4	0.0	203.5	0.0	938.2	849.0	7	7.72
203.5	305.3	0.0	203.5	0.0	963.4	630.0	28	41.68
203.5	305.3	0.0	203.5	0.0	963.4	630.0	3	9.56
133.0	200.0	0.0	192.0	0.0	927.4	839.2	3	6.88
288.0	192.0	0.0	192.0	0.0	932.0	717.8	90	50.53
200.0	133.0	0.0	192.0	0.0	965.4	806.2	7	17.17
200.0	133.0	0.0	192.0	0.0	965.4	806.2	28	30.44
250.2	166.8	0.0	203.5	0.0	977.6	694.1	3	9.73
122.6	183.9	0.0	203.5	0.0	958.2	800.1	3	3.32
153.0	102.0	0.0	192.0	0.0	888.0	943.1	90	26.32
200.0	133.0	0.0	192.0	0.0	965.4	806.2	90	43.25
116.0	173.0	0.0	192.0	0.0	909.8	891.9	3	6.28
173.0	116.0	0.0	192.0	0.0	946.8	856.8	90	32.10
250.2	166.8	0.0	203.5	0.0	977.6	694.1	28	36.96
305.3	203.5	0.0	203.5	0.0	965.4	631.0	90	54.60
192.0	288.0	0.0	192.0	0.0	929.8	716.1	7	21.48
157.0	236.0	0.0	192.0	0.0	935.4	781.2	3	9.69
153.0	102.0	0.0	192.0	0.0	888.0	943.1	7	8.37
141.3	212.0	0.0	203.5	0.0	971.8	748.5	90	39.66
116.0	173.0	0.0	192.0	0.0	909.8	891.9	7	10.09
141.3	212.0	0.0	203.5	0.0	971.8	748.5	3	4.83
122.6	183.9	0.0	203.5	0.0	958.2	800.1	7	10.35
166.8	250.2	0.0	203.5	0.0	975.6	692.6	90	43.57
203.5	305.3	0.0	203.5	0.0	963.4	630.0	90	51.86
310.0	0.0	0.0	192.0	0.0	1012.0	830.0	3	11.85
310.0	0.0	0.0	192.0	0.0	1012.0	830.0	7	17.24
310.0	0.0	0.0	192.0	0.0	1012.0	830.0	28	27.83
310.0	0.0	0.0	192.0	0.0	1012.0	830.0	90	35.76
310.0	0.0	0.0	192.0	0.0	1012.0	830.0	120	38.70
331.0	0.0	0.0	192.0	0.0	1025.0	821.0	3	14.31
331.0	0.0	0.0	192.0	0.0	1025.0	821.0	7	17.44
331.0	0.0	0.0	192.0	0.0	1025.0	821.0	28	31.74
331.0	0.0	0.0	192.0	0.0	1025.0	821.0	90	37.91
331.0	0.0	0.0	192.0	0.0	1025.0	821.0	120	39.38
349.0	0.0	0.0	192.0	0.0	1056.0	809.0	3	15.87
349.0	0.0	0.0	192.0	0.0	1056.0	809.0	7	9.01
349.0	0.0	0.0	192.0	0.0	1056.0	809.0	28	33.61
349.0	0.0	0.0	192.0	0.0	1056.0	809.0	90	40.66
349.0	0.0	0.0	192.0	0.0	1056.0	809.0	120	40.86
238.0	0.0	0.0	186.0	0.0	1119.0	789.0	7	12.05
238.0	0.0	0.0	186.0	0.0	1119.0	789.0	28	17.54
296.0	0.0	0.0	186.0	0.0	1090.0	769.0	7	18.91
296.0	0.0	0.0	186.0	0.0	1090.0	769.0	28	25.18
297.0	0.0	0.0	186.0	0.0	1040.0	734.0	7	30.96
480.0	0.0	0.0	192.0	0.0	936.0	721.0	28	43.89
480.0	0.0	0.0	192.0	0.0	936.0	721.0	90	54.28
397.0	0.0	0.0	186.0	0.0	1040.0	734.0	28	36.94
281.0	0.0	0.0	186.0	0.0	1104.0	774.0	7	14.50
281.0	0.0	0.0	185.0	0.0	1104.0	774.0	28	22.44
500.0	0.0	0.0	200.0	0.0	1125.0	613.0	1	12.64
500.0	0.0	0.0	200.0	0.0	1125.0	613.0	3	26.06
500.0	0.0	0.0	200.0	0.0	1125.0	613.0	7	33.21
500.0	0.0	0.0	200.0	0.0	1125.0	613.0	14	36.94
500.0	0.0	0.0	200.0	0.0	1125.0	613.0	28	44.09
540.0	0.0	0.0	173.0	0.0	1125.0	613.0	7	52.61
540.0	0.0	0.0	173.0	0.0	1125.0	613.0	14	59.76
540.0	0.0	0.0	173.0	0.0	1125.0	613.0	28	67.31
540.0	0.0	0.0	173.0	0.0	1125.0	613.0	90	69.66
540.0	0.0	0.0	173.0	0.0	1125.0	613.0	180	71.62
540.0	0.0	0.0	173.0	0.0	1125.0	613.0	270	74.17
350.0	0.0	0.0	203.0	0.0	974.0	775.0	7	18.13
350.0	0.0	0.0	203.0	0.0	974.0	775.0	14	22.53
350.0	0.0	0.0	203.0	0.0	974.0	775.0	28	27.34
350.0	0.0	0.0	203.0	0.0	974.0	775.0	56	29.98
350.0	0.0	0.0	203.0	0.0	974.0	775.0	90	31.35
350.0	0.0	0.0	203.0	0.0	974.0	775.0	180	32.72
385.0	0.0	0.0	186.0	0.0	966.0	763.0	1	6.27
385.0	0.0	0.0	186.0	0.0	966.0	763.0	3	14.70
385.0	0.0	0.0	186.0	0.0	966.0	763.0	7	23.22
385.0	0.0	0.0	186.0	0.0	966.0	763.0	14	27.92
385.0	0.0	0.0	186.0	0.0	966.0	763.0	28	31.35
331.0	0.0	0.0	192.0	0.0	978.0	825.0	180	39.00
331.0	0.0	0.0	192.0	0.0	978.0	825.0	360	41.24
349.0	0.0	0.0	192.0	0.0	1047.0	806.0	3	14.99
331.0	0.0	0.0	192.0	0.0	978.0	825.0	3	13.52
382.0	0.0	0.0	186.0	0.0	1047.0	739.0	7	24.00
382.0	0.0	0.0	186.0	0.0	1047.0	739.0	28	37.42
382.0	0.0	0.0	186.0	0.0	1111.0	784.0	7	11.47
281.0	0.0	0.0	186.0	0.0	1104.0	774.0	28	22.44
339.0	0.0	0.0	185.0	0.0	1069.0	754.0	7	21.16
339.0	0.0	0.0	185.0	0.0	1069.0	754.0	28	31.84
295.0	0.0	0.0	185.0	0.0	1069.0	769.0	7	14.80
295.0	0.0	0.0	185.0	0.0	1069.0	769.0	28	25.18
238.0	0.0	0.0	185.0	0.0	1118.0	789.0	28	17.54
296.0	0.0	0.0	192.0	0.0	1085.0	765.0	7	14.20
296.0	0.0	0.0	192.0	0.0	1085.0	765.0	28	21.65
296.0	0.0	0.0	192.0	0.0	1085.0	765.0	90	29.39
331.0	0.0	0.0	192.0	0.0	879.0	825.0	3	13.52
331.0	0.0	0.0	192.0	0.0	978.0	825.0	7	16.26
331.0	0.0	0.0	192.0	0.0	978.0	825.0	28	31.45
331.0	0.0	0.0	192.0	0.0	978.0	825.0	90	37.23
349.0	0.0	0.0	192.0	0.0	1047.0	806.0	7	18.13
349.0	0.0	0.0	192.0	0.0	1047.0	806.0	28	32.72
349.0	0.0	0.0	192.0	0.0	1047.0	806.0	90	39.49
349.0	0.0	0.0	192.0	0.0	1047.0	806.0	180	41.05
349.0	0.0	0.0	192.0	0.0	1047.0	806.0	360	42.13
302.0	0.0	0.0	203.0	0.0	974.0	817.0	14	18.13
302.0	0.0	0.0	203.0	0.0	974.0	817.0	180	26.74
525.0	0.0	0.0	189.0	0.0	1125.0	613.0	180	61.92
500.0	0.0	0.0	200.0	0.0	1125.0	613.0	90	47.22
500.0	0.0	0.0	200.0	0.0	1125.0	613.0	180	51.04
500.0	0.0	0.0	200.0	0.0	1125.0	613.0	270	55.16
540.0	0.0	0.0	173.0	0.0	1125.0	613.0	3	41.64
252.0	0.0	0.0	185.0	0.0	1111.0	784.0	7	13.71
252.0	0.0	0.0	185.0	0.0	1111.0	784.0	28	19.69
339.0	0.0	0.0	185.0	0.0	1060.0	754.0	28	31.65
393.0	0.0	0.0	192.0	0.0	940.0	758.0	3	19.11
393.0	0.0	0.0	192.0	0.0	940.0	758.0	28	39.58
393.0	0.0	0.0	192.0	0.0	940.0	758.0	90	48.79
382.0	0.0	0.0	185.0	0.0	1047.0	739.0	7	24.00
382.0	0.0	0.0	185.0	0.0	1047.0	739.0	28	37.42
252.0	0.0	0.0	186.0	0.0	1111.0	784.0	7	11.47
252.0	0.0	0.0	185.0	0.0	1111.0	784.0	28	19.69
310.0	0.0	0.0	192.0	0.0	970.0	850.0	7	14.99
310.0	0.0	0.0	192.0	0.0	970.0	850.0	28	27.92
310.0	0.0	0.0	192.0	0.0	970.0	850.0	90	34.68
310.0	0.0	0.0	192.0	0.0	970.0	850.0	180	37.33
310.0	0.0	0.0	192.0	0.0	970.0	850.0	360	38.11
525.0	0.0	0.0	189.0	0.0	1125.0	613.0	3	33.80
525.0	0.0	0.0	189.0	0.0	1125.0	613.0	7	42.42
525.0	0.0	0.0	189.0	0.0	1125.0	613.0	14	48.40
525.0	0.0	0.0	189.0	0.0	1125.0	613.0	28	55.94
525.0	0.0	0.0	189.0	0.0	1125.0	613.0	90	58.78
525.0	0.0	0.0	189.0	0.0	1125.0	613.0	270	67.11
322.0	0.0	0.0	203.0	0.0	974.0	800.0	14	20.77
322.0	0.0	0.0	203.0	0.0	974.0	800.0	28	25.18
322.0	0.0	0.0	203.0	0.0	974.0	800.0	180	29.59
302.0	0.0	0.0	203.0	0.0	974.0	817.0	28	21.75
397.0	0.0	0.0	185.0	0.0	1040.0	734.0	28	39.09
480.0	0.0	0.0	192.0	0.0	936.0	721.0	3	24.39
522.0	0.0	0.0	146.0	0.0	896.0	896.0	7	50.51
522.0	0.0	0.0	146.0	0.0	896.0	896.0	28	74.99
273.0	105.0	82.0	210.0	9.0	904.0	680.0	28	37.17
162.0	190.0	148.0	179.0	19.0	838.0	741.0	28	33.76
154.0	144.0	112.0	220.0	10.0	923.0	658.0	28	16.50
147.0	115.0	89.0	202.0	9.0	860.0	829.0	28	19.99
152.0	178.0	139.0	168.0	18.0	944.0	695.0	28	36.35
310.0	143.0	111.0	168.0	22.0	914.0	651.0	28	33.69
144.0	0.0	175.0	158.0	18.0	943.0	844.0	28	15.42
304.0	140.0	0.0	214.0	6.0	895.0	722.0	28	33.42
374.0	0.0	0.0	190.0	7.0	1013.0	730.0	28	39.05
159.0	149.0	116.0	175.0	15.0	953.0	720.0	28	27.68
153.0	239.0	0.0	200.0	6.0	1002.0	684.0	28	26.86
310.0	143.0	0.0	168.0	10.0	914.0	804.0	28	45.30
305.0	0.0	100.0	196.0	10.0	959.0	705.0	28	30.12
151.0	0.0	184.0	167.0	12.0	991.0	772.0	28	15.57
142.0	167.0	130.0	174.0	11.0	883.0	785.0	28	44.61
298.0	137.0	107.0	201.0	6.0	878.0	655.0	28	53.52
321.0	164.0	0.0	190.0	5.0	870.0	774.0	28	57.21
366.0	187.0	0.0	191.0	7.0	824.0	757.0	28	65.91
280.0	129.0	100.0	172.0	9.0	825.0	805.0	28	52.82
252.0	97.0	76.0	194.0	8.0	835.0	821.0	28	33.40
165.0	0.0	150.0	182.0	12.0	1023.0	729.0	28	18.03
156.0	243.0	0.0	180.0	11.0	1022.0	698.0	28	37.36
160.0	188.0	146.0	203.0	11.0	829.0	710.0	28	32.84
298.0	0.0	107.0	186.0	6.0	879.0	815.0	28	42.64
318.0	0.0	126.0	210.0	6.0	861.0	737.0	28	40.06
287.0	121.0	94.0	188.0	9.0	904.0	696.0	28	41.94
326.0	166.0	0.0	174.0	9.0	882.0	790.0	28	61.23
356.0	0.0	142.0	193.0	11.0	801.0	778.0	28	40.87
132.0	207.0	161.0	179.0	5.0	867.0	736.0	28	33.30
322.0	149.0	0.0	186.0	8.0	951.0	709.0	28	52.42
164.0	0.0	200.0	181.0	13.0	849.0	846.0	28	15.09
314.0	0.0	113.0	170.0	10.0	925.0	783.0	28	38.46
321.0	0.0	128.0	182.0	11.0	870.0	780.0	28	37.26
140.0	164.0	128.0	237.0	6.0	869.0	656.0	28	35.23
288.0	121.0	0.0	177.0	7.0	908.0	829.0	28	42.13
298.0	0.0	107.0	210.0	11.0	880.0	744.0	28	31.87
265.0	111.0	86.0	195.0	6.0	833.0	790.0	28	41.54
160.0	250.0	0.0	168.0	12.0	1049.0	688.0	28	39.45
166.0	260.0	0.0	183.0	13.0	859.0	827.0	28	37.91
276.0	116.0	90.0	180.0	9.0	870.0	768.0	28	44.28
322.0	0.0	116.0	196.0	10.0	818.0	813.0	28	31.18
149.0	139.0	109.0	193.0	6.0	892.0	780.0	28	23.69
159.0	187.0	0.0	176.0	11.0	990.0	789.0	28	32.76
261.0	100.0	78.0	201.0	9.0	864.0	761.0	28	32.40
237.0	92.0	71.0	247.0	6.0	853.0	695.0	28	28.63
313.0	0.0	113.0	178.0	8.0	1002.0	689.0	28	36.80
155.0	183.0	0.0	193.0	9.0	1047.0	697.0	28	18.28
146.0	230.0	0.0	202.0	3.0	827.0	872.0	28	33.06
296.0	0.0	107.0	221.0	11.0	819.0	778.0	28	31.42
133.0	210.0	0.0	196.0	3.0	949.0	795.0	28	31.03
313.0	145.0	0.0	178.0	8.0	867.0	824.0	28	44.39
152.0	0.0	112.0	184.0	8.0	992.0	816.0	28	12.18
153.0	145.0	113.0	178.0	8.0	1002.0	689.0	28	25.56
140.0	133.0	103.0	200.0	7.0	916.0	753.0	28	36.44
149.0	236.0	0.0	176.0	13.0	847.0	893.0	28	32.96
300.0	0.0	120.0	212.0	10.0	878.0	728.0	28	23.84
153.0	145.0	113.0	178.0	8.0	867.0	824.0	28	26.23
148.0	0.0	137.0	158.0	16.0	1002.0	830.0	28	17.95
326.0	0.0	138.0	199.0	11.0	801.0	792.0	28	40.68
153.0	145.0	0.0	178.0	8.0	1000.0	822.0	28	19.01
262.0	111.0	86.0	195.0	5.0	895.0	733.0	28	33.72
158.0	0.0	195.0	220.0	11.0	898.0	713.0	28	8.54
151.0	0.0	185.0	167.0	16.0	1074.0	678.0	28	13.46
273.0	0.0	90.0	199.0	11.0	931.0	762.0	28	32.24
149.0	118.0	92.0	183.0	7.0	953.0	780.0	28	23.52
143.0	169.0	143.0	191.0	8.0	967.0	643.0	28	29.72
260.0	101.0	78.0	171.0	10.0	936.0	763.0	28	49.77
313.0	161.0	0.0	178.0	10.0	917.0	759.0	28	52.44
284.0	120.0	0.0	168.0	7.0	970.0	794.0	28	40.93
336.0	0.0	0.0	182.0	3.0	986.0	817.0	28	44.86
145.0	0.0	134.0	181.0	11.0	979.0	812.0	28	13.20
150.0	237.0	0.0	174.0	12.0	1069.0	675.0	28	37.43
144.0	170.0	133.0	192.0	8.0	814.0	805.0	28	29.87
331.0	170.0	0.0	195.0	8.0	811.0	802.0	28	56.61
155.0	0.0	143.0	193.0	9.0	1047.0	697.0	28	12.46
155.0	183.0	0.0	193.0	9.0	877.0	868.0	28	23.79
135.0	0.0	166.0	180.0	10.0	961.0	805.0	28	13.29
266.0	112.0	87.0	178.0	10.0	910.0	745.0	28	39.42
314.0	145.0	113.0	179.0	8.0	869.0	690.0	28	46.23
313.0	145.0	0.0	127.0	8.0	1000.0	822.0	28	44.52
146.0	173.0	0.0	182.0	3.0	986.0	817.0	28	23.74
144.0	136.0	106.0	178.0	7.0	941.0	774.0	28	26.14
148.0	0.0	182.0	181.0	15.0	839.0	884.0	28	15.52
277.0	117.0	91.0	191.0	7.0	946.0	666.0	28	43.57
298.0	0.0	107.0	164.0	13.0	953.0	784.0	28	35.86
313.0	145.0	0.0	178.0	8.0	1002.0	689.0	28	41.05
155.0	184.0	143.0	194.0	9.0	880.0	699.0	28	28.99
289.0	134.0	0.0	195.0	6.0	924.0	760.0	28	46.24
148.0	175.0	0.0	171.0	2.0	1000.0	828.0	28	26.92
145.0	0.0	179.0	202.0	8.0	824.0	869.0	28	10.54
313.0	0.0	0.0	178.0	8.0	1000.0	822.0	28	25.10
136.0	162.0	126.0	172.0	10.0	923.0	764.0	28	29.07
155.0	0.0	143.0	193.0	9.0	877.0	868.0	28	9.74
255.0	99.0	77.0	189.0	6.0	919.0	749.0	28	33.80
162.0	207.0	172.0	216.0	10.0	822.0	638.0	28	39.84
136.0	196.0	98.0	199.0	6.0	847.0	783.0	28	26.97
164.0	163.0	128.0	197.0	8.0	961.0	641.0	28	27.23
162.0	214.0	164.0	202.0	10.0	820.0	680.0	28	30.65
157.0	214.0	152.0	200.0	9.0	819.0	704.0	28	33.05
149.0	153.0	194.0	192.0	8.0	935.0	623.0	28	24.58
135.0	105.0	193.0	196.0	6.0	965.0	643.0	28	21.91
159.0	209.0	161.0	201.0	7.0	848.0	669.0	28	30.88
144.0	15.0	195.0	176.0	6.0	1021.0	709.0	28	15.34
154.0	174.0	185.0	228.0	7.0	845.0	612.0	28	24.34
167.0	187.0	195.0	185.0	7.0	898.0	636.0	28	23.89
184.0	86.0	190.0	213.0	6.0	923.0	623.0	28	22.93
156.0	178.0	187.0	221.0	7.0	854.0	614.0	28	29.41
236.9	91.7	71.5	246.9	6.0	852.9	695.4	28	28.63
313.3	0.0	113.0	178.5	8.0	1001.9	688.7	28	36.80
154.8	183.4	0.0	193.3	9.1	1047.4	696.7	28	18.29
145.9	230.5	0.0	202.5	3.4	827.0	871.8	28	32.72
296.0	0.0	106.7	221.4	10.5	819.2	778.4	28	31.42
133.1	210.2	0.0	195.7	3.1	949.4	795.3	28	28.94
313.3	145.0	0.0	178.5	8.0	867.2	824.0	28	40.93
151.6	0.0	111.9	184.4	7.9	992.0	815.9	28	12.18
153.1	145.0	113.0	178.5	8.0	1001.9	688.7	28	25.56
139.9	132.6	103.3	200.3	7.4	916.0	753.4	28	36.44
149.5	236.0	0.0	175.8	12.6	846.8	892.7	28	32.96
299.8	0.0	119.8	211.5	9.9	878.2	727.6	28	23.84
153.1	145.0	113.0	178.5	8.0	867.2	824.0	28	26.23
148.1	0.0	136.6	158.1	16.1	1001.8	830.1	28	17.96
326.5	0.0	137.9	199.0	10.8	801.1	792.5	28	38.63
152.7	144.7	0.0	178.1	8.0	999.7	822.2	28	19.01
261.9	110.5	86.1	195.4	5.0	895.2	732.6	28	33.72
158.4	0.0	194.9	219.7	11.0	897.7	712.9	28	8.54
150.7	0.0	185.3	166.7	15.6	1074.5	678.0	28	13.46
272.6	0.0	89.6	198.7	10.6	931.3	762.2	28	32.25
149.0	117.6	91.7	182.9	7.1	953.4	780.3	28	23.52
143.0	169.4	142.7	190.7	8.4	967.4	643.5	28	29.73
259.9	100.6	78.4	170.6	10.4	935.7	762.9	28	49.77
312.9	160.5	0.0	177.6	9.6	916.6	759.5	28	52.45
284.0	119.7	0.0	168.3	7.2	970.4	794.2	28	40.93
336.5	0.0	0.0	181.9	3.4	985.8	816.8	28	44.87
144.8	0.0	133.6	180.8	11.1	979.5	811.5	28	13.20
150.0	236.8	0.0	173.8	11.9	1069.3	674.8	28	37.43
143.7	170.2	132.6	191.6	8.5	814.1	805.3	28	29.87
330.5	169.6	0.0	194.9	8.1	811.0	802.3	28	56.62
154.8	0.0	142.8	193.3	9.1	1047.4	696.7	28	12.46
154.8	183.4	0.0	193.3	9.1	877.2	867.7	28	23.79
134.7	0.0	165.7	180.2	10.0	961.0	804.9	28	13.29
266.2	112.3	87.5	177.9	10.4	909.7	744.5	28	39.42
314.0	145.3	113.2	178.9	8.0	869.1	690.2	28	46.23
312.7	144.7	0.0	127.3	8.0	999.7	822.2	28	44.52
145.7	172.6	0.0	181.9	3.4	985.8	816.8	28	23.74
143.8	136.3	106.2	178.1	7.5	941.5	774.3	28	26.15
148.1	0.0	182.1	181.4	15.0	838.9	884.3	28	15.53
277.0	116.8	91.0	190.6	7.0	946.5	665.6	28	43.58
298.1	0.0	107.5	163.6	12.8	953.2	784.0	28	35.87
313.3	145.0	0.0	178.5	8.0	1001.9	688.7	28	41.05
155.2	183.9	143.2	193.8	9.2	879.6	698.5	28	28.99
289.0	133.7	0.0	194.9	5.5	924.1	760.1	28	46.25
147.8	175.1	0.0	171.2	2.2	1000.0	828.5	28	26.92
145.4	0.0	178.9	201.7	7.8	824.0	868.7	28	10.54
312.7	0.0	0.0	178.1	8.0	999.7	822.2	28	25.10
136.4	161.6	125.8	171.6	10.4	922.6	764.4	28	29.07
154.8	0.0	142.8	193.3	9.1	877.2	867.7	28	9.74
255.3	98.8	77.0	188.6	6.5	919.0	749.3	28	33.80
272.8	105.1	81.8	209.7	9.0	904.0	679.7	28	37.17
162.0	190.1	148.1	178.8	18.8	838.1	741.4	28	33.76
153.6	144.2	112.3	220.1	10.1	923.2	657.9	28	16.50
146.5	114.6	89.3	201.9	8.8	860.0	829.5	28	19.99
151.8	178.1	138.7	167.5	18.3	944.0	694.6	28	36.35
309.9	142.8	111.2	167.8	22.1	913.9	651.2	28	38.22
143.6	0.0	174.9	158.4	17.9	942.7	844.5	28	15.42
303.6	139.9	0.0	213.5	6.2	895.5	722.5	28	33.42
374.3	0.0	0.0	190.2	6.7	1013.2	730.4	28	39.06
158.6	148.9	116.0	175.1	15.0	953.3	719.7	28	27.68
152.6	238.7	0.0	200.0	6.3	1001.8	683.9	28	26.86
310.0	142.8	0.0	167.9	10.0	914.3	804.0	28	45.30
304.8	0.0	99.6	196.0	9.8	959.4	705.2	28	30.12
150.9	0.0	183.9	166.6	11.6	991.2	772.2	28	15.57
141.9	166.6	129.7	173.5	10.9	882.6	785.3	28	44.61
297.8	137.2	106.9	201.3	6.0	878.4	655.3	28	53.52
321.3	164.2	0.0	190.5	4.6	870.0	774.0	28	57.22
366.0	187.0	0.0	191.3	6.6	824.3	756.9	28	65.91
279.8	128.9	100.4	172.4	9.5	825.1	804.9	28	52.83
252.1	97.1	75.6	193.8	8.3	835.5	821.4	28	33.40
164.6	0.0	150.4	181.6	11.7	1023.3	728.9	28	18.03
155.6	243.5	0.0	180.3	10.7	1022.0	697.7	28	37.36
160.2	188.0	146.4	203.2	11.3	828.7	709.7	28	35.31
298.1	0.0	107.0	186.4	6.1	879.0	815.2	28	42.64
317.9	0.0	126.5	209.7	5.7	860.5	736.6	28	40.06
287.3	120.5	93.9	187.6	9.2	904.4	695.9	28	43.80
325.6	166.4	0.0	174.0	8.9	881.6	790.0	28	61.24
355.9	0.0	141.6	193.3	11.0	801.4	778.4	28	40.87
132.0	206.5	160.9	178.9	5.5	866.9	735.6	28	33.31
322.5	148.6	0.0	185.8	8.5	951.0	709.5	28	52.43
164.2	0.0	200.1	181.2	12.6	849.3	846.0	28	15.09
313.8	0.0	112.6	169.9	10.1	925.3	782.9	28	38.46
321.4	0.0	127.9	182.5	11.5	870.1	779.7	28	37.27
139.7	163.9	127.7	236.7	5.8	868.6	655.6	28	35.23
288.4	121.0	0.0	177.4	7.0	907.9	829.5	28	42.14
298.2	0.0	107.0	209.7	11.1	879.6	744.2	28	31.88
264.5	111.0	86.5	195.5	5.9	832.6	790.4	28	41.54
159.8	250.0	0.0	168.4	12.2	1049.3	688.2	28	39.46
166.0	259.7	0.0	183.2	12.7	858.8	826.8	28	37.92
276.4	116.0	90.3	179.6	8.9	870.1	768.3	28	44.28
322.2	0.0	115.6	196.0	10.4	817.9	813.4	28	31.18
148.5	139.4	108.6	192.7	6.1	892.4	780.0	28	23.70
159.1	186.7	0.0	175.6	11.3	989.6	788.9	28	32.77
260.9	100.5	78.3	200.6	8.6	864.5	761.5	28	32.40
