# Supplementary material
Source: ML conference proceedings conference paper supplement (https://proceedings.mlr.press/v108/ishibashi20a.html)
Supplement: Supplementary file 2 [file ishibashi20a-supp.zip › 137_supp/program/dataset/power_plant/ccpp.txt]

8.34	40.77	1010.84	90.01	480.48
23.64	58.49	1011.4	74.2	445.75
29.74	56.9	1007.15	41.91	438.76
19.07	49.69	1007.22	76.79	453.09
11.8	40.66	1017.13	97.2	464.43
13.97	39.16	1016.05	84.6	470.96
22.1	71.29	1008.2	75.38	442.35
14.47	41.76	1021.98	78.41	464
31.25	69.51	1010.25	36.83	428.77
6.77	38.18	1017.8	81.13	484.31
28.28	68.67	1006.36	69.9	435.29
22.99	46.93	1014.15	49.42	451.41
29.3	70.04	1010.95	61.23	426.25
8.14	37.49	1009.04	80.33	480.66
16.92	44.6	1017.34	58.75	460.17
22.72	64.15	1021.14	60.34	453.13
18.14	43.56	1012.83	47.1	461.71
11.49	44.63	1020.44	86.04	471.08
9.94	40.46	1018.9	68.51	473.74
23.54	41.1	1002.05	38.05	448.56
14.9	52.05	1015.11	77.33	464.82
33.8	64.96	1004.88	49.37	427.28
25.37	68.31	1011.12	70.99	441.76
7.29	41.04	1024.06	89.19	474.71
13.55	40.71	1019.13	75.44	467.21
6.39	35.57	1025.53	77.23	487.69
26.64	62.44	1011.81	72.46	438.67
7.84	41.39	1018.21	91.92	485.66
21.82	58.66	1011.71	64.37	452.16
27.17	67.45	1015.67	49.03	429.87
13.42	41.23	994.17	95.79	468.82
20.77	56.85	1012.4	83.63	442.85
8.29	36.08	1020.38	81.53	483.26
30.98	67.45	1015.18	45.4	433.59
31.96	71.29	1008.39	47.51	433.04
15.83	52.75	1024.3	58.34	458.6
22.56	70.79	1005.85	93.09	435.14
25.91	75.6	1018.23	62.65	443.2
8.24	39.61	1017.99	78.42	477.9
24.66	60.29	1018	59.56	445.26
29.31	68.67	1006.18	63.38	435.57
21.48	66.91	1008.58	84.49	447.42
18.28	44.71	1016.99	33.71	462.28
26.96	65.34	1015.05	46.93	441.81
16.01	65.46	1014	87.68	454.16
27.37	63.73	1009.79	65.25	437.24
16.3	39.63	1004.64	85.61	464.11
23.8	48.6	1002.43	67.32	440.89
8.19	41.66	1016.57	75.38	485.2
25.28	67.69	1009.05	68.54	445.34
21.47	70.32	1011.72	88.36	440
30.54	67.45	1014.37	32.97	431.35
18.3	44.06	1017.95	63.24	456.32
25.82	72.39	1003.4	86.33	432.98
31.12	69.13	1009.61	56.54	429.41
15.99	39.63	1006.09	89.92	464.95
8.42	42.28	1008.4	87.78	481.91
23.7	69.23	1011.73	73.18	437.15
15.71	40.12	1012.81	97.46	462.6
29.11	74.9	1003.31	74.01	432.43
23.73	61.02	1009.71	78.7	442.22
28.26	65.34	1014.56	43.4	441.03
15.92	41.2	1016.04	73.37	468.91
33.4	70.8	1009.17	57.01	432.46
31.92	68.3	1015.58	41.55	430.07
26.87	74.99	1002.48	71.91	437.78
5.23	40.78	1025.13	92.74	483.12
15.72	41.76	1023.07	66.95	462.19
17.74	50.88	1015.56	89.78	457.71
27.13	59.54	1004.33	73.27	438.32
25.82	66.49	1013.2	60.32	434.35
34.2	68.14	1002.7	56.09	427.05
19.13	68.61	1010.65	94.92	448.69
11.77	41.06	1021.45	76.63	475.88
10.25	41.46	1018.67	84.41	479.28
23.82	48.92	1010.48	44.45	446.85
30.1	66.25	1009.38	65.41	434.99
29.92	69.75	1009.12	67.15	441.5
29.63	66.75	1018.08	58.46	433.26
30.61	77.17	1009.49	73.19	430.46
16.18	50.88	1014.06	100.09	455.14
31.66	73.91	1004.49	68.13	431.26
29.14	61.5	1009.64	39.95	437.76
18.4	43.96	1012.4	77.81	464.63
15.86	38.62	1016.65	67.51	462.58
6.31	42.07	1004.61	77.74	483.27
23.4	72.99	1009.48	88.82	438.51
33.62	77.17	1009.38	63.71	431.03
6.89	43.65	1019.87	72.77	484
27.41	69.98	1008.51	65.49	431.64
26.37	54.5	1014.48	66.31	451.78
26.58	59.39	1014.49	65.87	439.46
15.25	43.02	1012.04	41.43	467.23
21.24	41.67	1012.6	49.27	459.81
24.98	58.05	1011.69	69.97	447.15
26.63	64.44	1012.66	61.19	442
18.87	52.08	1005.25	99.19	449.61
5.12	40.78	1025.45	96.88	481.28
31.1	71.32	1008.09	45.87	437.54
7.91	39.96	1023.57	88.44	475.52
14.97	58.2	1019.52	81.13	458.68
28.92	61.02	1011.19	56.13	436.76
22.92	61.9	1013.27	78.32	446.08
12.55	38.91	1012.58	75.44	474.35
9.38	41.44	1015.09	86.8	481.96
10.28	41.46	1018.44	85.23	479.66
30.31	77.24	1008.02	67.84	435.28
25.34	71.06	1007.74	92.52	434.86
30.47	70.02	1009.65	62.03	435.72
20.18	56.53	1020.3	77.1	454.14
21.31	46.97	1014.08	62.57	455.76
22.1	74.87	1009.4	85.78	442.83
20.09	63.94	1020.82	74.16	449.47
22.36	58.79	1016.69	73.6	445.76
9.43	37.14	1013.03	74.99	473.57
28.86	49.3	1003.93	52.85	435.75
23.25	70.32	1009.28	86.52	437.96
22.7	60.84	1019.15	71.48	438.59
21.3	59.39	1013.83	84.53	444.21
19.94	44.9	1008.52	74.69	459.47
14.97	43.67	1011.13	87.33	465.54
13.83	40.78	1024.85	73.08	458.85
23.39	71.25	1005.22	93.7	435.68
21.48	47.43	1006.88	63.54	449.2
22.63	58.41	1013.69	90.32	445.43
20.01	45.09	1014.21	38.19	453.96
20.52	43.79	1015.9	68.1	463.93
13.58	49.83	1008.9	86.8	465.82
14.38	44.84	1024.59	81.68	471.6
28.53	69.84	1004.46	68.03	427.72
13.89	35.71	1016.4	65.49	468.54
25.93	69.34	1008.91	79.43	434.08
17.84	61.27	1020.1	70.68	454.57
6.28	41.06	1020.96	90.91	489.79
8.16	39.64	1011.21	85.56	481.78
18.61	67.71	1004.07	84.49	443.57
16.23	43.72	1009.96	83.01	457.9
8.66	41.01	1022.51	98.55	472.16
19.53	66.54	1013.72	81.46	451.19
10.17	40.46	1018.54	68.21	470.33
6.48	40.27	1010.55	82.12	486.68
12.69	40.75	1016.05	82.92	472.68
23.77	61.87	1009.8	54.83	445.72
14.43	43.5	1021.86	83.14	466.58
28.25	57.19	1007.99	67.9	436.99
12.26	39.96	1011.79	79.06	470.87
14.55	42.74	1027.29	66.64	457.77
24.57	51.95	1005.8	70.07	448.15
10.25	41.26	1007.44	98.08	476.03
21.96	51.43	1007.28	89.96	442.87
9.82	39.64	1010.79	69.22	477.93
18.58	44.6	1016.61	48.15	459.06
20.57	44.9	1008.39	62.69	456.18
8.61	41.04	1024.81	95.6	473.62
9.99	43.52	1022.95	99.67	473.64
13.97	52.05	1012.05	85.36	463.64
16.76	43.67	1011.27	70.55	462.44
25.58	47.01	1014.5	63.53	454.39
17.34	46.48	1007.18	83.15	452.06
19.13	66.86	1012.95	71.24	453.31
12.75	40.64	1020.44	83.17	466.93
29.46	49.3	1003.88	54.1	436.37
15.59	52.75	1024.3	59.93	458.87
14.2	43.02	1012.18	57.07	470.67
14.05	40.35	1011.52	66.21	475.54
32.35	77.95	1014.76	60.88	432.72
21.41	56.9	1007.03	79.41	441.41
10.61	37.5	1008.8	100.13	472.9
19.13	40.79	1004.47	91.7	457.83
17.28	44.06	1018.15	66.93	462.05
24.79	50.78	1008.78	61.88	445.3
28.66	50.05	1006.08	47.74	435.94
12.91	41.16	1011.9	89.19	472.71
17.32	43.7	1015.13	61.66	464.5
18.74	59.21	1018.3	91.55	449.77
26.69	70.36	1006.82	68.29	435.04
12.28	40.55	1005.72	98.56	472.47
14.46	44.78	1007.64	67.03	459.31
30.54	70.17	999.42	64.32	434.62
27.58	66.48	1004.82	51.23	435.34
32.17	73.21	1001.43	69.86	430.64
26.23	59.87	1012.93	66.62	447.16
11.69	35.76	1019.02	55.6	471.72
14.73	39.82	1012.67	80.82	470.41
12.36	48.04	1012.8	93.59	468.37
9.52	40.96	1023.48	86.49	483.59
27.32	73.42	1012.07	86.3	432.74
23.81	73.17	1012.13	86.13	438.11
7.92	42.28	1008.55	81.68	484.75
23.58	58.82	1009.68	81.38	445.01
20.78	60.84	1018.66	80.4	445.82
19.68	68.28	1002.62	71.57	452.47
14.12	40.92	1022.46	73.28	459.76
22.97	62.4	1010.25	75.18	445.3
6.89	39.37	1020.21	74.17	486.9
19.98	56.53	1020.22	73.53	454.89
21.71	60.27	1015.74	89.76	441.19
23.02	59.21	1011.74	83.18	440.5
27.71	69.51	1009.65	58.38	435.04
10.46	37.5	1013.12	76.74	472.16
27.18	62.66	1009.89	52.83	442.16
25.56	50.05	1005.67	69.29	442.49
19.69	39.72	1001.49	60.34	456.55
31.37	76.86	997.34	62.94	431.03
14.17	41.67	1013.4	72.77	471.42
15.6	43.71	1024.88	80.37	463.34
25.3	71.58	1010.18	87.36	433.97
7.09	39.37	1020.07	73.26	487
6.07	41.14	1027.57	86.98	480.19
9.86	38.38	1018.22	85.35	479.56
14.73	40.35	1011.15	65.2	470.03
31.32	74.33	1012.92	36.48	429.57
6.14	38.5	1012.4	75.35	489.26
27.92	69.23	1013.21	44.43	435.62
25.63	58.86	1014.86	52.75	443.84
16.37	36.99	1006.37	90.11	463.76
28.31	65.71	1014.67	59.29	447.26
24.44	69.84	1005.34	80.37	430.3
11.33	41.5	1013.58	88.7	475.01
23.87	63.94	1019.02	44.28	445.11
21.14	48.78	1020.39	86.2	450.35
22.24	60.07	1015.93	62.25	446.14
23.07	70.47	1008.64	83.37	439.04
25.95	59.14	1016.42	67.03	438.46
16.44	43.96	1013.66	76.31	468.57
20.66	41.54	1014.68	79.7	461.55
15.01	39.52	1017.53	72	468.02
20.51	63.86	1020.65	75.36	447.18
24.1	52.84	1006.47	47.58	444.69
9.38	40.46	1019.29	75.77	474.1
27.49	71.94	1008.25	68.29	428.27
32.84	68.14	1003.59	43.88	425.18
20.83	44.78	1008.51	35.9	460.6
28.69	67.25	1017.71	44.6	436.21
9.35	44.03	1011.02	88.11	476.25
17.37	41.23	998.79	68.44	461.08
14.84	41.48	1017.26	63.42	460.3
27.88	68.94	1007.68	75.68	435.04
17.83	43.72	1008.64	78.72	453.86
7.64	42.28	1008.46	84.29	484.78
25.67	74.78	1010.24	68.87	440.48
23.1	51.3	1011.93	80.05	452.17
27.13	69.45	1013.9	51.16	434.47
26.95	70.8	1009.73	82.95	436.8
19.4	42.44	1013.19	58.63	459.76
13.5	44.92	1023.87	87.17	468.85
11.97	41.04	1026.42	70.75	468.81
18.11	58.95	1016.61	89.17	454.29
24.1	71.29	1007.96	67.56	442.8
20.29	65.27	1013.17	74.94	445.52
21.82	65.27	1013.86	72.81	447.43
29.45	75.6	1018.12	50.68	437.31
10.87	38.38	1020.85	69.78	477.03
17.36	39.53	1008.28	68.87	456.57
24.97	58.95	1017.19	56.24	440.03
13.72	45.09	1012.95	87.41	466.24
26.49	61.86	1012.55	74.24	440.21
8.25	41.26	1020.59	91.84	475.17
12.8	44.9	1007.58	66.6	466.95
17.08	40.12	1012.17	81.5	457.81
31.4	71.06	1008.44	74.77	433.34
8.26	44.71	1020.85	68.82	485.19
21.22	59.15	1014.68	59.71	450.96
26.1	62.91	1012.44	60.91	446.05
19.91	51.19	1008	90.23	449.23
14.56	40.69	1015.48	73.73	469.31
10.22	41.74	1022.65	83.58	479.01
29.12	67.83	1008.05	46.86	432.46
16.97	39.16	1005.7	69.13	458.59
26.19	49.3	1003.69	65.88	440.13
23.65	66.05	1019.6	78.21	442.9
29.53	70.94	1007.22	70.68	432.43
19.69	56.65	1020.84	72.14	455.07
33.71	69.98	1013.09	42.62	431.99
32.14	75.08	1005.35	49.92	439.22
29.28	77.17	1009.4	76.3	433.14
7.01	37.8	1021.47	62.84	483.95
30.47	68.24	1009.55	64.98	427.94
29.13	47.93	1002.5	49.1	435.61
11.86	39.85	1013	66.92	478.29
26.16	52.36	1013.62	58.52	453.08
10.56	39.13	1010.19	87.12	463.14
8.58	40.72	1022.04	87.55	480.96
14.26	40.92	1022.07	73.96	460.38
23.48	73.67	1007.07	88.49	437.19
5.54	45.87	1008.69	95.91	478.02
16.98	43.99	1021.65	81.17	456.07
30.08	67.25	1017.6	53.09	434.01
10.63	39.61	1020	72.42	476.99
30.36	74.87	1008.96	61.87	435.31
29.56	70.4	1006.49	82.95	432.85
19.94	56.53	1020.48	76.43	453.8
27.55	64.96	999.73	57.34	431.33
31.44	79.74	1006.95	56.99	431.69
25.35	74.33	1015.29	77.84	435.66
4.11	38.44	1015.9	81.79	488.05
30.59	70.04	1010.28	50.56	429.13
14.04	48.79	1017.62	75.25	464.09
15.47	44.9	1021.59	81.74	465.61
8.67	40.77	1011.81	89.4	479.23
10.53	37.5	1008.55	99.91	472.32
7.99	41.38	1021.95	78.77	487.57
22.29	45.01	1012.4	51.58	449.08
9.06	36.3	1015.14	58.71	477.38
10.05	37.14	1012.64	75.97	474.16
20.07	49.21	1012.34	56.8	454.25
30.65	71.98	1004.92	63.39	429.85
14.38	40.73	1017.48	90.64	462.98
27.76	71.97	1008.53	86.97	434.04
16.7	40.56	1019.04	50.9	470.84
5.35	35.57	1027.12	80.81	488.65
11.57	41.38	1021.71	61.49	473.94
30.57	73.03	1013.75	73.68	437.42
16	40.66	1016.12	89.23	457.12
15.6	41.04	1025.48	64.43	457.49
22.12	47.93	1005.5	84.47	443.41
21.33	58.46	1016.17	79.73	445.27
23.65	59.92	1010.19	89.53	436.74
6.8	39.37	1020.24	73.29	487.33
31.35	71.32	1005.99	62.35	434.43
23.99	68.12	1012.92	70.68	437.14
26.53	54.2	1012.9	66.73	439.96
31.59	62.7	1009.3	50.16	442.58
24.06	69.94	1005.47	60.46	436.88
27.28	44.89	1009.02	49.9	441.94
23.69	71.97	1009.62	93.03	438.62
11.46	39.1	1010.17	100.15	470.55
22.61	49.3	1003.51	83.02	441.76
21.84	45.09	1013.94	46.11	450.88
9.2	39.82	1013.19	91.25	482.89
17.75	49.25	1020.86	63.67	454.41
7.53	43.65	1018.58	64.85	479.15
16.76	45.09	1014.28	57.71	458.67
22.69	65.12	1016.35	72.02	446.91
11.91	44.45	1021.39	84.49	466.52
26.63	61.47	1008.18	69	444.16
6.72	39.85	1011.84	84.66	489.09
9.44	43.99	1020.31	98.06	475.01
18.32	45	1022.67	46.38	471.43
18.31	62.1	1020.38	79.02	455.24
26.57	44.57	1007.76	50.39	445.49
34.33	69.05	1000.89	37.9	430.56
14.85	40.8	1025.38	53.29	471.78
29.33	64.84	1010.76	53.32	443.15
8.77	40.46	1019.68	77.84	475
11.35	38.91	1017.93	83.45	474.22
21.38	44.05	1005.69	81.66	445.71
4.88	40.27	1012.66	74.51	491.29
26.66	64.27	1012.83	58.88	437.87
13.04	45.09	1013	87.68	467.44
29.47	71.32	1008.07	67	437.14
18.91	56.9	1006.98	84.07	448.24
24.86	44.05	1005.69	66.65	447.2
9.42	41.4	1029.6	87.43	478.12
12.75	42.34	1018.17	94.67	465.44
21.32	49.02	1008.81	85.81	445.65
24.26	67.69	1008.48	66.74	437.4
20.01	43.77	1012.13	65.53	455.66
21.35	59.04	1012.28	95.71	445.83
17.43	63.09	1019.87	92.77	449.36
27.86	65.18	1012.87	55.53	436.26
20.74	59.8	1015.46	76.39	452.99
27.73	67.69	1007.47	59.42	431.72
9.53	41.44	1018.01	80.09	481.83
28.5	79.74	1006.75	87.09	433.08
21.39	52.3	1009.2	79.77	446.87
14.54	46.18	1015.29	94.48	463.03
28.01	65.34	1014.68	46.86	440.77
30.51	70.94	1007.64	59.42	430.91
21.63	60.84	1018.16	77.53	445.93
26.39	71.25	999.8	89.12	430.34
13.84	41.26	1020.92	74.74	462.46
17.27	43.52	1021.37	76.73	460.08
21.89	58.05	1011.31	85.71	441.76
24.02	64.63	1020.49	55.17	449.66
31.92	75.33	1001.81	61.97	436.38
12.97	49.83	1008.69	91.49	452.07
15.89	43.96	1014.02	75.24	467.35
9.25	41.26	1020.51	91.21	473.87
15.99	43.5	1021.34	73.22	460.7
9.06	39.66	1019.64	76.98	479.53
14.48	44.06	1018.73	75.88	467.46
27.15	59.21	1013.49	51.71	440.27
21.68	64.15	1021.09	70.88	454.32
28.16	61.47	1009.19	62.53	442.48
34.33	74.34	1001.74	42.75	435.76
31.98	64.05	1010.49	58.01	439.56
15.21	43.56	1012.92	56.61	467
13.56	42.34	1017.95	93.83	462.6
10.32	42.02	998.27	99.12	472.16
22.46	58.49	1011.5	70.54	448.46
29.3	68.08	1011.23	56.23	434.11
22.3	44.57	1008.48	67.58	449.74
21.91	70.32	1009.17	90.57	439.29
10.95	43.8	1022.61	63.46	473.2
24.96	68.12	1011.27	70.22	437.62
5.91	39.33	1010.18	95.53	491.49
5.25	40.07	1019.48	67.7	495.23
21.47	60.93	1006.46	87.83	442.75
10.16	39.3	1019.71	81.21	480.74
17.29	44.06	1016.24	77.56	461.38
17.46	40.22	1006.7	91.96	461.74
11.56	40.43	1025.48	74.75	489.54
7.51	41.01	1024.61	97.41	477.61
17.08	38.58	1015.41	73.42	461.49
9.27	42.02	1004.29	95.05	474.93
21.3	48.92	1010.92	65.09	447.89
8.51	40.81	1015.54	83.16	481.02
12.77	41.5	1014.13	86.8	470.68
25.04	65.48	1017.66	57.08	440.92
21.83	41.1	1001.91	41.79	453.38
15.92	41.79	1006.24	79.42	458.68
29.97	69.14	1007.92	66.74	433.82
9.8	41.82	1032.98	67.55	473.72
9.01	38.56	1016.67	63.61	482.37
24.71	61.9	1013.78	85.82	443.39
20.57	63.78	1016.76	74	449.93
24.32	65.48	1017.55	59.02	443.31
21.41	50.32	1008.61	84.47	443.63
27.09	59.15	1013.02	55.18	438.9
23.49	47.45	1008.46	66.18	446.72
20	63.31	1017.06	63.1	449.68
13.4	41.58	1020.5	71.17	461.54
23.6	60.08	1017.51	63.02	451.97
21.03	70.02	1010.21	95.69	444.53
5.15	45.87	1008.02	98.36	479.61
17.16	58.86	1016.4	86.39	453.76
24.59	71.94	1006.89	88.52	430.28
23.05	65.94	1010.99	69.73	442.39
10.48	37.5	1009.81	95.26	474.57
15.72	43.02	1011.98	45.74	466.33
25.56	70.32	1009.07	90.63	433.72
13.78	41.16	1021.65	75.77	460.44
29.35	69.04	1008.55	61.78	445.04
32.09	79.74	1006.92	61.5	432.85
25.16	77.3	1000.73	86.4	439.37
14.63	40	1018.03	63.4	457.09
5.7	40.35	1012.18	91.57	488.8
28.15	74.9	1003.67	76.32	433.63
22.3	57.19	1006.4	75.28	445.1
27.71	72.99	1007.18	72.68	433.01
23.09	45.01	1012.25	43.95	453.45
19.66	42.18	1001.51	95.75	454.46
10.02	52.75	1021.93	73.68	473.09
23.97	68.67	1006.63	76.83	441.53
7.82	38.91	1015.58	90.11	479.15
30.21	69.4	1003.69	62.89	438.18
24.12	62.44	1013.83	88.02	443.3
21.05	63.09	1016.49	91.23	447.45
13.93	40.24	1017.88	88.35	469.25
9.68	41.06	1022.75	87.44	476.67
17.48	49.39	1021.51	84.53	460.01
28.76	66.56	1006.07	62.41	432.3
19.21	53.16	1013.18	81.64	454.01
25.63	72.99	1008.2	86.8	436.64
20.36	66.05	1015.86	87.19	450.23
15.34	40.73	1018.03	86.19	458.55
9.55	40.72	1023.12	68.06	481.08
13.45	41.16	1022.04	82.96	460.57
10.8	39.58	1011.99	87.54	478.24
28.15	72.99	1007.62	70.03	431.83
15.42	40.56	1021.23	59.37	469.33
33.6	74.33	1012.31	35.66	428.62
30.92	78.05	1011	59.62	434.12
25.24	57.17	1010.44	74	442.77
13.6	41.2	1015.92	85.05	467.42
18.68	46	1002.2	97.17	447.8
22.43	69.84	1006.94	75.54	436.19
23.37	70.94	1008.01	81.28	441.56
19.62	43.56	1012.89	37.6	463.33
14.35	39.39	1012.92	82.41	470.53
24.88	63.91	1009.41	77.75	447.28
20.67	63.56	1013.27	79.39	450.7
34.11	73.56	1006.77	45.92	432.78
19.15	44.89	1009.6	74.52	451.09
24.96	70.47	1007.73	76.48	438.23
18.86	42.18	1001.16	98.58	457.07
25.1	60.37	1005.83	72.53	438.44
10.15	43.41	1018.4	82.07	473.43
26.53	65.18	1012.77	64.37	437.39
26.05	46.21	1011.31	55.25	450.86
25.45	74.33	1015.53	80.95	435.12
8.14	39.96	1023.41	88.86	477.05
31.95	67.17	1007.11	61.58	432.6
30.8	73.56	1007.39	75.78	432.43
7.69	43.02	1014.51	85.23	486.46
15.3	43.67	1011.75	95.31	468.14
27.12	70.32	1009.94	52.67	429.08
25.76	74.87	1010.18	65.15	443.7
10.28	39.64	1010.45	74.15	477.65
30.91	79.74	1006.92	56.32	433.84
24.22	61.86	1013.39	80.11	442.65
5.67	45.87	1008.91	93.29	478.44
22.96	68.61	1011.15	76.62	447.18
24.54	65.46	1014.27	40.77	446.26
11.32	36.18	1015.03	64.68	472.67
15.15	53.82	1016.34	62.59	461.6
23.53	50.05	1005.63	78.4	443.71
29.08	66.54	1004.67	64.5	430.16
20.42	60.77	1017.65	87.07	447.85
26.32	69.71	1009.39	67.05	441.25
21.89	74.93	1016.11	77.88	448.47
9.68	41.48	1018.24	71.04	473.31
16.73	54.3	1017.96	59.44	460.54
7.8	39.04	1018.46	66.5	482.31
23.29	65.61	1014.81	70.27	447.67
28.93	72.99	1007.23	64.41	434.45
16.75	42.23	1013.81	84.98	464.87
21.47	58.79	1017	76.97	446.33
25.98	68.12	1011.36	66.86	439
16.34	36.99	1006.99	90.06	466.24
25.23	69.34	1009.51	82.87	445.92
12.41	41.44	1015.46	76.9	472.06
24.2	60.77	1016.92	71.65	439.13
7.51	41.66	1015.9	78.31	485.58
31.53	70.94	1007.11	50.04	431.84
17.42	44.06	1016.63	82.15	456.57
6.92	39.61	1018.64	82.27	483.83
8.34	40.72	1023.62	83.75	483.14
32.07	67.83	1007.91	41.61	429.31
27.18	64.79	1016.27	63.7	443.87
9.24	41.4	1030.72	87.36	476.9
13.48	46.18	1018.15	88.38	464.58
22.74	61.02	1009.56	79.41	445.56
28.62	68.24	1010.15	69.31	428.08
25.11	62.26	1011.12	78.01	434.97
11.47	43.67	1012.68	72.51	475.72
29.51	75.6	1017.92	50.61	431.18
15.24	39.39	1013.01	74.24	469.79
22.71	75.23	1010.48	76.86	444
13.98	39.18	1009.61	89.12	467.97
17.89	40.12	1011.99	76.52	451.79
12.81	44.58	1016.49	80.76	475.5
15.54	41.96	1011.78	97.46	467.1
20.21	54.9	1016.82	66.56	454.23
6.17	36.25	1028.68	90.59	483.77
26.42	59.54	1007.02	76.28	438.5
14.6	44.47	1028.46	69.96	465.24
29.53	72.39	998.47	76.05	431.69
12.95	43.71	1025.63	90.7	469.15
13.26	40.83	1007.97	90.63	472.14
23.48	60.23	1011.91	79.48	437.44
10.16	41.55	1005.69	58.04	477.27
29.13	66.56	1006.63	52.85	439.31
10.8	41.74	1020.24	78.62	479.32
25.21	75.6	1017.19	69.84	445.84
20.72	44.57	1008.96	72.57	449.76
26.17	59.92	1010.01	73.75	444.96
17.48	44.2	1018.89	61.51	457.15
29.67	73.67	1006.48	64.98	429.28
26.38	71.73	1010.04	69.45	431.66
12.08	41.39	1019.45	78.3	477.8
25.3	70.98	1007.22	95.1	440.86
16.55	39.64	1009.07	77.8	465.29
13.18	43.8	1023.18	61.21	467
21.34	51.61	1010.11	80.7	452
20.06	44.9	1008.79	70.06	448.51
8.26	39.42	1025.89	70.53	474.72
8.51	38.5	1013.33	64.28	482.39
8.83	36.25	1028.86	85.6	478.45
14.52	44.84	1023.51	88.51	466.88
7.87	43.02	1014.67	83.58	485.61
7.14	44.71	1019.98	71.9	487.71
7.49	36.08	1020.27	85.69	483.26
11.01	40.22	1011.13	83.09	476.69
20.74	58.2	1017.54	70.66	450.4
30.98	67.48	1009.96	58.92	439.39
26.67	70.94	1007.7	56.56	439.13
28.24	71.58	1010.1	67.92	434.01
11.98	39.35	1014.97	98.05	472.43
30.91	69.75	1010.23	59.36	435.7
23.23	63.31	1012.52	75.1	441.5
30.13	78.05	1010.99	61.5	434.14
20.79	65.59	1014.9	77	450.3
14.38	45.09	1012.95	86.1	464.27
10.07	40.46	1018.65	69.2	470.99
10.48	41.38	1021.97	65.22	481.41
6.86	41.17	1020.12	79.14	490.23
13.25	41.62	1010.8	77.81	457.64
26.92	51.43	1012.29	59.33	437.35
12.76	40.27	1006.58	49.34	474.03
30.2	73.67	1006.31	62.14	428.72
10.72	41.38	1021.6	63.77	478.29
17.39	46.21	1013.94	82.73	454.06
30.97	67.69	1005.61	50.88	425.35
28.16	71.94	1007.69	68.17	430.46
28.84	73.03	1013.99	76.05	435.75
24.48	64.45	1014.69	51.43	452.82
11.23	39.72	1018.46	60.62	475.04
13.52	42.07	1017.91	90.21	464.07
16.61	45.87	1009.34	97.93	455.86
20.96	61.27	1019.99	67.32	448.77
32.15	69.98	1013.3	55.13	429.86
21.24	44.57	1008.72	72.57	447.03
26.49	78.92	1010.82	83.42	434.91
24.01	65.46	1014.17	43.02	443.81
33.15	70.4	1003.72	53.98	430.15
20.13	40.33	1005.31	85.42	460.09
21.41	62.39	1007.84	88.83	452.8
31.35	70.8	1010.11	66.37	432.19
27.44	58.9	1003.86	66.74	442.19
25.21	51.43	1006.43	78.55	439.01
32.06	75.33	1001.96	63.15	432.92
25.04	51.95	1005.56	66.53	449.45
13.31	40.1	1014.81	82.11	468.74
29.68	64.33	1011.2	57.73	441.79
13.46	44.71	1014.51	50	474.6
18.77	49.39	1021.06	82.95	454.53
13.56	39.18	1023.4	63.82	470.38
20.65	66.51	1014.94	71.83	456.49
26.5	66.05	1017.03	61.34	440.15
23.67	72.24	1011.22	90.45	435.94
8.64	41.66	1014.14	80.44	481.89
20.2	50.9	1011.72	77.63	454.09
5.04	40.64	1021.35	93.63	484.42
23.59	59.43	1009.96	65.8	440.61
17.47	58.16	1016.36	82.26	456.97
6.02	43.65	1013.85	83.53	481.92
30.05	56.9	1007.02	41.96	437.55
29.23	68.14	1004.31	81.46	428.87
26.03	64.44	1012.75	62.24	445.89
26.38	49.5	1012.82	37.19	457.81
5.66	40.62	1015.87	84.97	485.18
27.65	48.41	1008.54	58.25	440.94
17.88	46.97	1013.73	67.78	456.77
11.2	37.5	1013.81	72.81	472.2
20.94	58.16	1016.88	65.43	455.16
20.64	49.21	1014.86	58.47	454.2
19.21	60.07	1014.94	70.02	452.84
13.22	44.92	1023.84	87.99	471.43
33.6	77.17	1009.01	47.53	430.32
27.83	59.57	1011.22	71.05	443.85
21.11	58.49	1011.6	80.44	449.16
30.47	77.3	1002.13	63.7	434.68
15.48	47.83	1004.88	81.68	463.67
20.25	44.78	1007.93	40.16	462.44
15.87	39.31	1009.95	66.78	460.59
22.57	62.4	1009.77	86.05	444.69
12.67	48.14	1017.41	83.63	463.68
21.41	54.2	1011.37	82.28	448.11
30.86	70.32	1011.88	62.68	433.71
23.64	60.95	1014.92	64.91	447.86
5.52	42.85	1012.77	93.82	478.98
11.06	40.64	1021.47	96.16	479.13
24.41	56.9	1006.58	77.94	439.51
10.28	39.61	1020.43	69.09	478.34
14.67	71.14	1019.84	77.72	458.8
25.15	57.32	1012.41	41.84	440.1
21.5	44.58	1016.87	57.58	460.2
7.74	39.96	1025.78	95.81	475.23
21.31	42.8	1014.1	75.77	459.84
29.92	67.22	1014.09	50.62	444.78
4.15	39.9	1007.62	95.69	489.8
15.95	42.24	1017.71	69.32	465.35
25.01	66.56	1004.55	82.46	434.74
27.17	67.17	1006.76	81.59	431.73
28.14	43.21	1011.82	69.32	436.53
13.93	44.47	1025.35	81.54	469.25
25.83	70.47	1006.24	81.83	434.45
24.4	60.32	1016.5	70.96	447.73
26.35	69.48	1008.45	70.47	435.23
30.99	69.82	1009.41	50.84	437.46
25.82	57.19	1007.99	62.95	440.8
28.37	75.6	1017.48	55.19	439.25
29.28	74.33	1011.66	72.37	426.53
18.35	57.76	1019.64	77.94	458.41
16.69	46.18	1010.8	96.8	466.03
9.59	37.14	1013.8	72.85	474.74
10.11	39.35	1015.19	90.74	479.83
17.37	57.76	1016	86.59	456.4
20.92	49.15	1021.15	49.76	455.32
22.82	64.63	1020.78	66.73	449.34
23.55	51.95	1006	76.46	449.54
30.47	70.83	1010.91	46.94	444.39
13.16	40.71	1021.99	77.91	475.87
6.25	39.64	1010.98	83.45	483.43
16.98	53.16	1013.95	82.8	458.93
27.5	68.24	1010.38	73.44	430.9
24.39	63.21	1012.59	80.88	446.4
14.69	54.3	1018.01	73.4	462.63
26.31	72.39	1001.16	88.43	434.53
14.85	58.59	1014.04	89.85	454.62
21.95	59.43	1010.29	74.67	442.84
31.91	67.83	1008.76	53.22	425.28
16.2	65.46	1013.97	89.84	451.86
27.35	77.95	1012.14	74.14	431.72
8.73	41.26	1020.54	91.37	476.42
14.13	53.82	1016.72	64.85	467.08
13.18	40.24	1016.81	86.71	469.35
10.74	40.92	1021.74	94.97	466.77
6.28	43.02	1013.72	88.13	487.17
6.04	41.14	1027.92	87.12	481.37
16.78	58.95	1017.74	96.24	450.02
14.99	41.35	1004.56	98.9	466.85
26.26	65.06	1013.58	52.72	440.92
32.09	70.4	1003.73	55.65	434.64
22.88	63.91	1009.63	87.82	442.5
21.95	68.08	1012.91	69.36	443.93
26.65	63.78	1015.32	53.95	440.26
12.57	39.3	1019.57	72.44	473.67
15.67	41.1	1004.1	77.93	466.45
27.97	69.48	1010.4	57.24	432.18
13.76	45.87	1008.89	87.27	463.5
26.91	70.47	1007.55	72.59	434.24
25.18	71.98	1006.71	89.86	432.88
23.27	64.15	1020.98	71.18	452.26
23.2	73.17	1012	89.92	438.64
18.55	52.84	1004.45	86.82	450.23
7.23	41.22	1015.23	98.04	483.31
7.3	39.72	1020.85	77.83	485.1
13.93	39.64	1011.8	82.64	470.84
20.33	57.76	1016.47	75.35	450.25
32.2	72.29	1008.61	69.94	432.52
13.16	43.41	1016.43	79.47	465.6
27.26	73.18	1012.58	74.83	429.92
12.45	43.67	1013.61	91.34	474.27
12.04	40.23	1018.07	81.28	472.7
28.12	73.42	1011.49	80.16	435.46
27.21	67.45	1013.83	43.26	436.47
26.97	64.45	1009.43	53.96	443.75
26.99	72.99	1008	76.1	430.81
21.25	67.71	1006.9	55.76	444.98
30.33	68.67	1006	54.99	435.53
15.37	50.59	1019.02	98.2	463.35
25.8	44.57	1008	52.56	450.48
24.97	68.61	1011.08	58.94	447.83
15.98	39.64	1009.31	81.21	467.22
24.82	71.94	1010.5	64.67	438.69
21.32	45.01	1012.23	59.94	452.75
8.28	40.56	1023.29	79.44	486.4
27.22	67.9	1005.73	57.29	441.22
26.94	62.91	1011.68	41.3	449.1
18.86	46.48	1007.28	78.47	452
9.61	44.03	1008.3	91.36	473.54
26.2	65.18	1011.42	47.82	440.07
12.31	44.78	1011.15	77.34	468.29
16.48	48.92	1011.84	64.16	458.67
14.07	42.99	1007.57	96.05	468.87
25.19	63.94	1012.78	75.15	438.73
15.41	42.44	1012.6	86.74	472.28
13.16	43.71	1024.44	85.68	469.06
18.63	45.87	1007.98	79.9	453.79
16.94	50.59	1018.75	94.22	460.64
14.85	45.87	1009.37	84.65	462.67
24.56	63.21	1013.79	82.38	444.34
23.13	72.24	1010.92	92.3	437.67
26.84	71.94	1006.6	79.12	427.2
9.36	44.03	1010.3	87.2	474.68
30.19	64.79	1017.22	42.47	438.41
14.78	42.86	1015.32	84.75	471.17
18.6	68.28	1003.27	84.21	446.98
7.19	39.4	1011.45	90.65	483.04
29.15	73.42	1011.43	66.49	432.26
15.23	37.87	1020.17	85.02	464.02
9.19	41.01	1022.14	98.98	468.37
16.38	46.97	1013.6	73.67	459.87
18.23	60.95	1016.74	78.85	455.53
24.62	70.47	1010.55	72.71	435.88
5.72	39.33	1009.96	95.4	490.76
23.19	67.07	1005.67	65.19	442.45
13.21	40.56	1018.12	64.49	475.86
9.77	34.69	1027.72	74.98	477.51
30.82	70.36	1006.47	58.79	439.16
23.63	58.62	1016.45	69.97	445.51
24.66	48.78	1018.39	71.79	449.11
8.83	41.14	1025.37	94.36	474.51
14.79	46.48	1007.46	92.4	462.55
3.69	38.44	1016.74	82.87	490.78
24.03	66.54	1012.19	69.15	438.08
13.23	42.34	1018.02	97.49	462.21
25.79	67.17	1007.89	81.38	440.75
25.72	59.21	1012.37	66.62	437.72
11.8	41.54	1020	65.85	476.12
16.52	42.24	1017.51	67.65	469.13
23.51	63.78	1016.1	69.79	446.58
25.25	58.46	1015.54	70.76	444.05
19.82	58.16	1016.76	74.66	455.5
11.73	37.92	1008.24	65.13	472.04
27.96	73.42	1011.11	71.93	435.93
25.59	72.43	1007.88	82.98	432.49
22.61	59.87	1019.12	66.12	441.2
23.03	65.12	1016.29	69.8	447.84
26.38	44.89	1009.14	51.79	442.13
31.52	76.2	1008.31	57.35	435.31
20.36	60.1	1011.21	84.79	454.25
13.55	43.48	1016.08	67.25	464.33
25.44	61.25	1012.57	87.65	441.77
11.09	41.58	1020.99	91.09	464.81
25.36	60.07	1015.06	66.11	439.73
30.68	71.8	1010.81	61.4	435.4
25.48	60.29	1017.55	51.22	443.77
29.79	62.66	1008.5	48.51	440.27
8.37	39.99	1010.36	93.26	482.31
8.49	43.69	1016.93	85.63	483.62
26.85	74.16	1008.66	93.8	431.16
29.34	71.98	1005.19	75.19	428.24
21.11	58.12	1015.38	77.78	453.28
21.12	62.96	1020.83	69.96	454.65
15.03	35.71	1015.26	56.55	467.61
23.74	62.96	1019.65	63.39	449.48
32.96	69.75	1008.86	40.23	435.56
20.23	52.05	1012.15	47.49	457.57
22.46	58.33	1013.21	68.68	445.9
11.54	45	1022.77	80.79	482.34
24.62	68.31	1010.45	75.18	448.58
10.12	41.55	1005.78	62.34	475.46
15.67	38.62	1015.76	66.29	463.17
21.96	48.6	1004.87	76.27	446.56
11.82	41.54	1019.96	67.65	476.97
19.8	51.19	1008.25	91.98	446.66
22.32	64.27	1014.35	82.98	446.62
19.75	49.02	1009.38	92.89	446.63
25.48	65.12	1016.12	53.66	447.85
14.84	42.03	1017.47	79.27	466.2
21.38	49.21	1012.49	53.77	449.66
18.67	47.83	1005.12	82.97	454.47
26.27	58.33	1013.81	60.43	438.82
27.23	63.9	1014.3	47.19	443.61
20.87	63.31	1012.27	79.51	446.7
19.4	39.53	1007.96	63.38	457.17
21.97	65.61	1016.09	73.29	447.05
17.16	40.55	1000.26	72.21	461.58
13.62	42.34	1017.87	89.67	464.79
13.9	44	1025.1	87.17	466.24
9.45	39.04	1023.08	75.81	483.66
23.66	62.08	1022.42	64.13	447.06
26.91	70.02	1010.75	59.48	445.31
23.04	74.99	1005.44	92.86	437.65
26.93	67.07	1005.65	60.26	437.76
24.59	60.37	1005.31	76.81	438.09
34.63	74.33	1011.7	31.45	428.54
20.48	60.29	1017.16	72.1	455.51
26.55	60.23	1009.88	79.54	438.95
10.74	43.67	1011.75	80.1	477.32
12.28	43.67	1012.69	70.23	475.08
10.8	41.66	1013.79	81.96	475.51
26.26	71.73	1009.59	80.06	430.79
24.9	71.77	1006.24	85.25	427.77
28.41	74.16	1010.29	72.09	439.2
22.72	63.73	1012.63	82.14	448.56
33.4	69.98	1013.29	47.78	432.44
26.35	59.87	1013.24	73.63	447.26
24.58	49.02	1008.85	79.32	442.47
12.76	42.32	1015.35	78.18	466.15
9.64	39.85	1012.9	83.82	478.37
10.91	41.04	1026.57	74.24	469.53
12.27	41.17	1019.39	52.18	473.84
28.4	74.93	1013.65	48.6	442.23
11.04	45.51	1017.53	83.42	474.45
20.75	60.77	1017.91	86.06	448.58
21.31	69.05	1002.46	73.42	440.97
25.4	65.34	1013.11	53.93	445.82
25.95	65.61	1014.36	52.54	443.88
27.44	65.59	1010.76	68.67	441.08
18.42	58.95	1016.95	86.77	452.1
17.48	46.21	1014.02	80.78	455.35
13.87	49.83	1006.76	89.14	462.46
10.06	39.61	1020.87	74.01	476.92
23.21	62.44	1011.78	76.66	442.47
21.44	60.32	1015.2	81.1	448.84
26.73	68.84	1010.75	66.83	440.45
30.96	64.44	1013.63	49.64	437.61
14.6	44.84	1023.58	88.21	464.88
20.28	63.86	1016.04	74.66	447.26
15.47	38.73	1001.13	77.61	467.96
11.71	40.05	1014.49	86.09	471.49
25.77	68.08	1010.99	73.58	433.46
18.13	66.86	1012.9	78.84	454.85
11.2	35.76	1019.24	64.59	473.33
9.78	43.8	1022.25	69.64	477.22
23.85	74.22	1009.99	82.72	441.66
16.7	50.66	1014.86	94.87	457.74
28.41	66.91	1008.22	57.93	440.52
29.64	67.79	1009.99	51.23	440.74
24.39	71.85	1009.73	72.24	438.2
32.39	74.16	1008.53	61.09	431.17
31.56	66.44	1008.91	64.16	430.11
17.72	48.14	1013.26	65.09	457.44
30.85	67.45	1014.53	32.99	430.8
13.19	39.18	1023.67	66.78	469.62
33.79	69.05	1001.62	40.13	435.1
13.99	45	1023.83	77.92	472.55
24.78	57.19	1008.08	65.4	443.62
17.82	56.89	1014.24	77.73	453.83
24.9	67.25	1017.77	66.17	433.71
11.46	44.85	1014.3	63.24	475.33
28.68	70.32	1008.51	45.73	430.48
18.2	45.01	1013.82	68.14	452.21
23.5	50.78	1008.7	57.7	445.09
10.34	41.74	1020.07	79.17	480.84
15.64	38.28	1014.39	76.93	466.51
13.55	42.99	1007.58	97.55	470.82
26.18	68.08	1012.92	55.7	436.51
10.81	45	1023.45	85.89	482.63
28.09	65.27	1013.27	51.96	440
25.32	61.25	1011.56	80.1	436.67
29.23	72.99	1007.04	63.47	431
9	43.13	1020.25	81.32	481.09
17.29	52.72	1024.71	62.32	467.23
13.92	39.58	1012.5	80.28	465.67
30.15	72.51	1009.37	50.64	443.72
23.96	51.3	1011.81	71.81	451.11
17.34	44.06	1015.84	74.88	458.5
14.02	44.47	1028.02	68.97	465.93
29.12	74.87	1009.85	62.51	435.51
10.22	39.64	1010.72	63.05	477.22
27.74	74.78	1010.05	60.82	436.87
16.5	39.72	1003.05	65.99	459.06
20.46	59.21	1018.42	85.89	445.22
27.51	71.29	1009.43	76.92	430.42
13.1	49.83	1007.29	92.79	466.08
31.07	70.32	1011.74	65.91	436.16
10.79	43.56	1015.15	73.01	479.64
22.57	63.94	1013.49	81.61	443.58
33.63	70.4	1004.02	53.6	430.05
22.56	47.43	1006.72	54.82	448.65
20.65	41.67	1012.76	45.27	455.5
24.31	65.94	1011.5	61.61	442.69
25.61	47.43	1008.62	54.51	442.96
9.41	41.54	1019.48	82.19	481.59
6.61	36.24	1013.57	91.8	483.12
13.53	38.73	1004.86	85.38	472.46
10.2	41.46	1020.23	84.54	481.46
9.26	39.61	1021.18	84.58	480.38
12.02	43.69	1016.12	74.07	477.74
14.74	43.71	1024.35	81.53	465.49
8.35	43.79	1016.2	85.23	484.21
19.35	39.72	1002.5	51.24	455.29
26.74	69.89	1013.96	51.82	436.02
12.17	41.58	1013.89	88.98	463.03
13.91	39.35	1014.69	75.51	469.02
16.15	41.85	1016.54	81.58	466.56
28.31	50.05	1005.75	50.17	436.75
32.87	70.8	1009.54	59.85	433.1
29.48	73.21	1000.67	79.35	433.53
29.23	69.59	1009	71.41	437.95
7.71	40.71	1021.53	95.48	471.38
26	70.47	1009.61	74.66	435.05
31.41	74.16	1011.1	57.05	434.88
5.28	45.87	1008.25	97.88	479.91
10.19	44.63	1020.58	91.64	472.45
10.35	40.27	1005.09	92.42	477.8
13.72	54.3	1017.89	79.08	467.05
10.96	37.5	1013.46	79.54	471.05
19.36	39.54	1008.97	58.92	458.75
31.23	75.08	1004.93	46.19	439.14
32.77	71.32	1007.68	42.39	436.95
23.35	71.77	1005.99	90.79	434.6
24.99	51.43	1006.95	79.63	441.45
26.53	69.71	1009.88	76.26	446.17
18.62	65.48	1018.45	73.39	451.94
16.72	53.82	1015.46	66.9	458.25
21.07	67.07	1004.64	86.16	446.05
31.08	59.57	1010.76	60.49	442.88
22.85	60.08	1018.05	67.12	452.5
22.99	56.57	1013.93	78.77	445.44
11.12	44.92	1025.58	93.52	470.82
16.63	43.77	1012.25	75.09	458.66
28.85	59.27	1011.69	51.8	440.3
29.97	70.32	1007.44	53.26	428.42
30.73	69.89	1015	58.9	426.79
27.17	61.02	1011.38	65.32	437.06
30.15	69.88	1007.2	73.67	434.75
13.18	40.83	1007.67	95.44	472.36
28.44	69.84	1003.25	68.24	426.69
34.4	77.95	1009.83	57.86	430.87
23.1	60.08	1017.69	65.44	451.01
28.08	59.14	1016.16	58.08	438.83
30.92	80.18	1010.11	72.47	432.35
26.47	69.51	1009.51	65.02	433.89
7.97	39.04	1018.51	65.17	483.3
30.07	70.98	1007.74	75.68	437.55
20.31	69.94	1009.7	86.53	446.87
13.65	39.28	1012.97	79.64	471.91
24.1	60.29	1008.2	61.81	449.79
32.23	69.13	1000.61	55.1	426.9
17.69	44.34	1019.31	61.12	464.13
5.42	41.38	1020.77	86.02	491.38
32.89	73.68	1014.45	52.34	426.46
26.59	59.92	1009.97	70.09	438.22
28.74	71.14	1011.53	48.6	430.12
9	36.3	1027.11	75.89	480.31
18.5	46.93	1015	66.81	455.63
32.21	71.85	1008.25	58.09	429.15
18.31	46.21	1010.46	82.15	451.75
27.14	64.27	1012.71	54.4	441.68
26.22	49.82	1015.48	55.8	454.2
22.72	69.84	1005.96	83.9	436.7
10.63	42.28	1008.37	92.68	474.97
19.39	51.43	1011.06	94.35	456.25
26.85	73.77	1001.2	90.13	431.24
9.74	41.01	1019.12	98.39	465.8
16.34	42.28	1008.08	52.8	463.29
18.36	62.1	1019.9	79.09	453.5
8.03	37.8	1020.47	60.67	481.51
7.34	40.72	1023.01	80.08	483.92
28.17	72.43	1007.37	68.92	428.88
23.92	66.54	1009.93	62.37	441.9
12.17	40.6	1013.59	88.62	473.76
29.13	70.72	1009.61	67.49	436.9
26.09	60.29	1017.72	50.83	444.71
19.08	41.1	1001.96	62.77	458.94
20.5	51.19	1009	91.79	445.35
23	49.5	1014.15	66.68	454.44
26.08	70.32	1012.32	89	434.24
31.27	69.13	1009.45	57.01	425.48
25.69	73.18	1012.64	86.35	432.82
10.16	40.8	1028.13	86.39	477.49
30.49	70.32	1011.34	66.33	434.76
28.45	69.23	1013.07	39.46	436.96
22.04	58.05	1013.11	85.22	447.28
13.18	40.03	1017.75	82.29	470.88
31.41	76.09	1007.68	70.49	430.81
11.3	25.36	1008.66	96.18	471.19
24.22	68.51	1013.23	74.96	440.01
16.21	41.23	995.88	80	463.09
14.55	41.7	1018.58	80.8	454.14
15.04	41.35	1004.29	99.1	467.96
22.21	61.5	1008.34	76.22	445.77
30.16	73.17	1010.74	58.99	434.43
13.34	41.79	1011.48	86.66	461.12
21.18	70.02	1010.27	96.46	442.51
8.54	38.08	1019.75	71.24	478.31
12.2	39.72	1018.07	54.83	471.33
13.47	44.88	1017.56	93.23	476.67
16.73	43.79	1016.25	73.58	468.87
17.99	50.16	1009.98	100.09	451.38
20.1	58.95	1018.46	80.87	446.7
20.82	52.84	1004.13	79.42	449.59
14.28	42.77	1020.06	81.77	466.75
15.31	40.66	1016.46	84.64	458.26
12.62	34.03	1019.06	74.78	471.55
16.1	36.71	1013.58	74.41	471.46
14.46	45.87	1009.21	84.09	464.5
13.96	40.92	1022.65	73.08	460.95
24.54	48.06	1013.02	55.18	443.67
31.27	73.77	1003.27	71.48	430.32
27.15	73.9	1007.57	74.42	433.09
31.21	66.44	1008.57	65.76	430.7
9.48	44.68	1023.29	92.9	478.66
21.16	65.48	1016.99	72.79	446.37
21.87	61.45	1011.13	92.22	445.21
15.35	35.4	1016.3	57.12	468.94
16.07	47.83	1006.99	86.49	458.18
31.2	73.17	1010.28	53.23	431.23
27.71	66.93	1016.85	58.77	447.06
6.98	40.35	1011.92	94.72	484.19
28.54	76.86	1000.09	74.67	433.35
10.22	45.01	1018.27	93.62	474.32
11.87	36.43	1023.42	79.5	474.17
23.21	74.22	1009.68	88.46	440.46
25.95	59.92	1010.05	76.05	443.93
11.21	40.75	1016.45	86.14	479.2
32.45	66.44	1011.21	50.18	429.99
19.09	65.94	1012.53	81.06	446.34
24.04	60.77	1017.62	75.23	442.25
25.1	74.87	1010.01	79.41	439.93
27.04	65.06	1013.33	52.37	439.84
14.4	42.18	1015.47	77.7	464.81
26.6	63.07	1011.97	61.3	442.25
5.25	42.85	1013.75	89.67	477.78
19.97	50.78	1008.75	92.7	446.57
22.23	46.93	1013.09	58.02	448.27
8.67	36.66	1026.8	84.36	480.38
22.08	55.5	1018.42	58.46	455.79
5.56	45.87	1006.99	96.48	476.61
11.02	38.28	1013.51	95.66	472.11
16.52	43.7	1015.08	58.36	466.73
27.54	74.22	1007.44	75.91	430.72
15.79	38.28	1014.4	74.84	465.64
31.45	68.27	1007.56	64.79	430.81
21.8	51.3	1012.07	89.51	450.25
23.25	72.99	1009.17	89.85	438.51
19.46	46.33	1013.77	89.62	452.11
26.86	70.47	1007.18	72.38	434.59
25.44	65.06	1013.82	55.72	440.09
28.35	70.32	1009.22	47.13	427.21
14.81	43.7	1015.1	60.72	469.5
6.07	38.91	1019.25	83.39	483.56
22.77	59.92	1009.67	94.09	437.9
16.31	68.28	1003.98	98.62	450.33
30.93	61.5	1009.81	41.46	437.35
29.31	64.84	1010.49	53.97	442.11
26.05	65.27	1013.69	56.46	440.75
25.69	62.26	1011.38	74.08	436.36
22.1	65.06	1014.56	71.5	442.18
11	40.23	1019.08	86.5	475.9
33.26	68.51	1012.49	52.68	429.38
11.91	40.69	1014.41	83.71	476.71
24.23	59.04	1011.91	71.79	443.06
24.35	73.17	1012.2	85.88	435.66
26.65	74.16	1008.27	94.54	431.47
28.24	65.74	1013.4	64.87	438.47
24.79	75.6	1017.07	68.23	440.05
24.43	60.07	1015.59	59.99	444.71
9.16	41.03	1021.3	76.08	484.96
2.64	39.64	1011.02	85.24	481.29
11.7	41.16	1019.58	87.49	464.12
15.93	52.75	1024.57	58.71	457.92
18.41	42.04	1011.69	64.88	465.64
18.07	44.92	1024.72	69.15	457.53
12.82	41.58	1020.37	81.06	464.07
8.25	43.14	1011.3	87.1	479.95
16.99	40.89	1011.54	64.51	464.95
27.46	69.98	1013.28	63.73	435.36
21.11	58.66	1011.7	68.71	457.89
14.66	40.73	1017.45	88.57	459.23
26.19	69.34	1009.48	87.59	433.99
20.89	67.71	1006.12	59.12	445.39
25.16	57.17	1009.86	75.7	442.03
31.15	67.45	1014.85	42.11	431.97
9.63	40.27	1009.96	81.03	477.38
14.15	39.28	1013.5	77.63	471.23
25.77	73.68	1014.18	87.53	429.84
24.46	68.61	1011.02	76.66	440.58
26.21	56.85	1011.45	41.37	439.55
30.55	66.25	1009.15	63.52	440.74
14.13	41.23	994.6	93.02	467.84
3.73	39.42	1024.4	82.42	488.58
24.79	59.21	1017.9	53.83	446.04
16.57	63.31	1016.19	81.02	454.78
26.86	68.08	1012.99	50.04	436.25
22.09	65.59	1015.54	72.44	447.28
29.12	66.51	1015.69	37.9	432.88
14.45	43.34	1015.47	83.33	462.16
11.58	41.74	1020.41	74.09	478.06
32.55	73.03	1014.36	44.83	439.81
31.79	76.2	1007.89	56.3	434.01
19.7	52.84	1004.86	89.72	444.64
11.22	41.66	1008.96	72.38	477.53
21.83	63.87	1018.93	63.07	452.21
29.6	71.94	1007.07	62.65	429.02
28.07	74.33	1012	71.69	428.87
10.12	38.38	1018.22	85.93	477.73
9.84	40.72	1022.21	77.79	477.52
15.41	44.78	1007.69	65.17	456.83
22.64	70.98	1005.71	95.65	441.99
13.53	42.86	1014	90.63	471.73
8.94	36.71	1025.5	80.45	477.62
23.72	58.62	1016.65	69.1	447.49
21.26	50.32	1008.41	87.22	446.22
10.23	42.32	1017.53	89.93	473.59
7.64	38.18	1017.65	78.51	484.45
14.92	41.16	1004.83	83.7	465.72
27.62	68.27	1008.04	63.04	427.67
10.56	40.22	1005.08	89.71	478.02
17.9	52.08	1006.41	100.09	451.94
29.41	64.05	1009.82	67.4	444.82
17.68	45.17	1017.5	77.57	461.96
23.56	49.16	1002.54	69.07	443.02
25.01	68.63	1013.76	43.65	447.12
29.95	67.25	1017.68	51.91	433.13
22.36	64.15	1021.05	68.43	453.94
17.36	41.23	998.08	63.46	459.1
10.05	40.71	1015.51	84.21	471.68
21.94	62.52	1015.99	74.56	449.87
20.15	39.72	1001.85	59.32	456.87
7.31	42.18	1014.75	86.75	477.38
21.7	64.44	1014.95	73.33	448.51
4.86	39.4	1012.73	91.39	488.63
15.52	41.93	1022.97	52.92	471.97
6.94	39.61	1017.74	81.43	480.07
19.11	44.85	1014.76	45.86	464.66
16.84	56.03	1020.25	70.37	437.14
11.63	40.55	1022.89	87.12	474.67
21.24	44.3	1014.34	83.39	444
15.47	46.48	1007.69	91.07	462.58
29.42	69.14	1007.32	75.04	437.75
14.33	42.86	1010.82	88.59	469.52
18.75	63.09	1018.19	87.84	450.98
12.5	43.67	1013.99	90.91	473.26
28.98	70.8	1008.19	73.45	434.08
4.41	42.07	1005.54	68.85	488.36
16.61	43.77	1012.25	77.23	457.66
5.28	42.07	1003.82	80.84	485.24
9.83	38.56	1017.35	62.8	480.47
14.28	37.2	1013.96	82.71	467.44
32.87	71.32	1004.36	54.69	433.15
26.82	66.51	1016.32	55.76	439.48
30.56	69.04	1009.29	55.73	442.24
18.24	59.15	1012	84.4	449.48
22.18	62.91	1012.14	68.86	449.77
8.44	41.17	1019.9	70.72	486.15
13.74	45.08	1024.97	84.79	466.79
11.02	41.26	1020.69	92.13	471.93
19.6	48.14	1013.18	68.71	456.57
26.03	69.68	1011.61	60.75	449.54
20.71	49.69	1010.26	69.97	455.69
21.67	61.45	1010.84	92.19	443.82
19.13	42.18	1001.45	98.77	456.04
27.79	69.23	1012.86	45.71	435.06
6.08	35.79	1011.08	90.59	483.08
29.56	71.14	1011.42	53.18	432.09
15.84	41.04	1025.64	63.43	456.21
30.93	69.98	1013.33	62.1	432.25
20.45	59.8	1015.13	79.21	452.96
11.1	40.92	1021.98	94.14	462.07
17.06	58.96	1013.83	73.95	461.15
26.47	63.13	1013.72	79.4	441.81
25.03	47.93	1003.02	62.89	443.55
8.85	41.06	1020.99	86.05	486.4
16.74	41.16	1006.87	74.24	463
6.8	41.16	1023.17	95.4	477.8
24.26	68.14	1005.09	59.49	438.79
17.98	60.1	1009.61	84.11	452.57
22.97	72.24	1011.15	95.85	437.41
17.99	43.72	1008.64	75.04	453.02
29.29	70.36	1006.64	60.82	431.26
15.28	43.71	1024.32	81.24	463.44
14.16	40.89	1010.78	82.86	471.15
25.06	52.36	1014.7	67.98	454.13
18.97	44.85	1014.86	46.31	466.17
29.04	70.72	1009.55	66.58	437.95
19.72	47.03	1012.1	90.36	458.59
15.63	44.9	1009.38	82.8	457.44
12.19	40.05	1014.65	85.1	472.68
16.3	41.16	1007.88	76.61	463.47
14.8	44.71	1014.67	41.71	470.77
24.63	59.57	1010.45	85.36	440.67
12.32	43.69	1016.26	83.18	471.6
5.53	40.64	1020.78	97.25	479.88
13.11	41.44	1015.55	74.45	471.61
25.12	77.95	1009.26	82.95	433.4
14.84	71.14	1019.61	66.78	454.16
25.24	67.45	1013.56	50.91	438.99
12.87	39.3	1019.26	71.55	471.48
19.25	43.43	1012.01	73.26	451.08
15.11	43.13	1014.99	46.91	466.74
29.23	77.3	1002.71	65.24	438.05
12.6	40.35	1011.89	80.88	475.42
7.91	38.56	1016.48	68.94	485.95
23.45	45.61	1012.84	73.42	454.92
32.1	69.98	1013.31	55.84	431.09
16.25	40.89	1011.09	62.7	464.33
23.27	68.28	1005.01	74.83	444.86
17.01	50.9	1013.23	82.03	460.14
8.76	41.82	1033.29	76.5	480.08
27.35	60.75	1008.98	67.56	435.14
10.51	37.5	1010.7	96.29	474.24
23.56	66.49	1012.21	53.86	441.92
29.24	60.23	1009.62	59.71	438.24
29.86	69.34	1007.76	54.12	433.57
29.1	76.2	1006.28	60.22	435.97
11.38	52.75	1026.19	72.71	469.9
29.53	64.44	1013.22	59.75	440.1
8.48	36.18	1013.31	75.15	480.63
24.91	69.89	1015.25	82.39	438.29
26.46	61.41	1012.41	56.58	448.83
16.61	25.88	1009.34	65.47	460.97
11.77	40.92	1021.85	81.55	467.31
19.1	56.53	1020.18	76.38	455.52
9.19	40.62	1017.78	68.91	475.42
13.53	42.03	1017.52	84.02	466.71
14.94	42.77	1018.9	73.95	462.67
29.05	70.32	1011.33	72.5	437.16
15.27	38.73	1002.83	77.77	465.99
25.96	60.95	1014.52	50.03	444.19
15.75	39.99	1007.02	77.44	464.95
23.69	77.54	1009.32	89.7	440.21
11.92	40.55	1016.91	100.07	472.45
28.54	72.99	1007.42	67.87	432
13.72	45.01	1014.07	77	464.59
6.1	40.07	1020.21	67.24	494.43
12.64	41.26	1020.79	83.66	465.78
17.14	58.16	1018.59	77.22	458.61
25.43	69.13	1002.2	86.44	431.53
12.78	41.04	1025.16	85.14	461.61
21.17	52.3	1009.67	88.88	444.5
31.19	70.94	1007.29	51.91	436.6
12.42	43.8	1023.13	79.8	466.59
29.62	70.02	1010.09	43.1	439.35
16.29	50.88	1013.79	99.15	456.28
12.33	39.28	1011.84	80.01	476.49
26.8	72.58	1009.22	89.03	431.18
13.63	43.22	1012.71	72.85	464.62
27.47	70.72	1009.97	74.62	443.25
24.47	57.85	1013.05	66.34	445.37
13.46	39.85	1012.76	72.94	472.5
11.78	39.96	1011.37	82.95	472.79
10.42	39.35	1015.21	89.75	478.52
4.49	40.27	1012.01	76.5	494.24
25.45	63.76	1009.96	67.78	439.56
21.29	47.45	1008.85	71.6	447.78
22.65	68.67	1006.67	77.42	447.01
11.06	41.5	1013.09	89.8	476.24
25.56	75.6	1017.37	69.31	442.2
24.51	51.95	1005.57	63.53	449.73
25.76	71.06	1007.93	90.4	433.75
17.85	48.14	1017.16	86.68	451.9
13.83	39.64	1012.52	69.97	472.95
31.38	72.29	1008.73	73.27	430.58
18.39	38.52	1019.66	66.93	453.89
17.79	45.01	1015.71	67.13	454.4
23.57	63.91	1011.65	80.74	441.93
12.03	40.75	1015.93	85.07	474.97
26.82	69.05	1004.62	40	437.42
21.76	60.27	1018.96	85.06	446.86
31.23	68.67	1005.82	52.1	436.58
9.98	41.01	1017.83	98.07	466.05
12.86	40.6	1013.6	84.85	472.04
31.49	73.5	1010.71	40.16	432.13
9.08	36.18	1020.24	68.37	477.26
24.72	77.54	1008.39	81.03	438.52
21.49	70.32	1009.07	92.25	443.04
25.2	63.76	1009.78	64.96	438.15
18.39	52.08	1006.53	100.09	449.96
30.58	65.18	1011.61	37.43	437.17
30.2	56.9	1006.89	42.69	436.17
23.59	47.43	1006.64	48.92	447.36
28.61	52.84	1006	45.73	437.39
14.82	42.74	1028.04	69.81	466.34
31.7	76.09	1007.06	72.39	441.36
7.69	36.24	1013.08	88.37	482.46
21.79	60.93	1006.44	87.68	443.01
10.11	41.62	1017.17	97.82	463.57
12.25	44.85	1014.13	85.25	470.92
21.04	65.46	1017.22	63.02	452.12
17.01	49.15	1021.83	84.02	458.78
18.03	58.86	1015.99	89.03	450.33
30.4	77.3	1002.44	59.42	438.43
28.28	56.9	1006.38	64.99	445.61
28.6	71.22	1003.15	58.33	443.01
11.08	38.16	1014.45	74.99	473.32
11.68	40.55	1017.31	99.82	473.51
23.54	65.27	1013.78	64.28	445.19
14.32	44.6	1013.85	68.13	466.36
27.31	59.54	1006.24	71.99	440.13
30.06	69.14	1007.5	72.48	436.89
18.74	44.34	1019.4	55.16	468.84
25.93	66.56	1004.97	76.35	433.25
27.71	54.2	1012.72	47.25	440.74
20.15	65.59	1014.62	79.39	449.84
26.69	59.21	1012.55	57.59	436.33
16.26	38.58	1016.04	76.7	462.54
29.05	75.6	1017.63	51.16	439.14
14.1	48.92	1011.6	84.39	461.34
19.7	54.42	1011.83	89.86	450.48
8.57	39.69	1000.91	99.9	474.29
10.41	41.01	1020.12	94.27	472.82
14.55	42.74	1028.41	70.09	465.81
31.49	69.13	1009.33	53.9	425.74
26.12	75.6	1017.41	72.31	439.68
7	39.81	1017.47	87.65	484.51
11.15	41.26	1022.67	81.83	473.57
14.27	44.34	1018.95	71.44	470.98
15.34	43.5	1021.18	79.44	459.77
25.16	60.23	1011.21	68.31	444.98
11.92	40.62	1015.91	55.4	464.9
22.3	67.25	1017.33	75.85	453.27
29.42	71.32	1002.26	67.13	437.47
12.42	41.58	1019.49	86.31	466.05
31.42	69.13	1009.34	57.16	425.98
21.9	63.13	1011.54	81.83	447.4
29.83	68.67	1005.33	71.15	434.28
4.32	35.47	1017.8	88.51	488.03
24.22	56.89	1013.81	70.02	440.79
27.04	48.41	1008.57	60.73	441.21
23.75	66.54	1004.41	85.44	436.57
7.67	42.85	1012.02	93.35	478.94
9.7	37.14	1012.79	75.2	475.77
16.16	25.88	1009.58	72.24	461.86
7.48	38.5	1014.01	77.35	488.43
5.15	40.07	1012.27	63.31	495.35
18.81	52.08	1005.77	98.86	450.72
27.88	75.23	1011.33	58.91	439.33
13.14	40.66	1016.47	94.76	466.95
30.51	59.57	1011.08	61.94	436.92
8.73	41.92	1029.41	89.72	480.99
13.83	41.49	1020.11	87.29	469.57
15.14	41.93	1020.95	61.26	469.68
28.69	71.29	1009.22	68.35	433.07
12.68	41.16	1020.09	83.32	464.93
9.64	40.56	1022.51	78.62	483.39
28.69	73.18	1012.23	68.57	431.36
12.75	42.86	1014.9	88.44	475.09
25.23	66.44	1011.37	51.3	438.28
10.17	40.1	1014.05	91.9	479.58
10.94	25.36	1009.47	100.1	470.9
24.67	49.5	1013.62	59.42	455.31
20.77	52.05	1012.22	45.61	455.02
23.43	60.32	1015.34	69.34	446.88
10.09	41.62	1015.21	96.56	463.86
23.69	63.77	1013.39	79.5	444.07
26.65	74.67	1015.73	77.32	435.9
13.56	49.83	1007.01	89.86	466.33
21.22	43.43	1010.96	61.07	448.06
19.94	65.46	1017.7	68.94	448.67
22.21	61.87	1010.9	54.22	446.62
17.53	50.66	1012.74	91.51	457.28
7.17	39.4	1011.48	90.38	484.33
27.77	62.26	1010.88	66.45	430.19
29.29	73.18	1012.4	66.65	430.31
14.16	44.06	1018.92	76.34	464.91
8.55	35.77	1016.15	73.32	481.44
14.12	39.4	1008.02	76.45	468.63
5.47	38.68	1017.33	72.71	485.7
18.8	47.83	1005.86	76.77	453.9
19.69	59.14	1015.99	70.33	448.69
21.11	41.67	1012.44	52.86	460.33
3.92	41.31	999.22	95.26	487.35
11.67	42.74	1025.92	79.57	474.75
14.05	41.39	1019.06	68.54	472.19
11.28	40.55	1006.23	97.78	475.14
11.48	37.92	1008.47	70.55	472.9
17.47	43.77	1012.25	76.78	456.41
25.64	70.72	1010.16	84	441.68
20.6	65.12	1015.53	71.57	452.86
21.37	57.76	1018.8	70.12	454.66
20.51	45.38	1014.29	69.14	461.87
27.28	51.43	1011.46	51.38	450.53
29.91	70.02	1010.18	64.1	437.63
17.65	62.1	1019.63	84.3	452.2
25.77	71.37	1008.88	78.96	433.45
9.54	41.17	1019.79	65.61	481.18
20.36	57.5	1014.36	82.96	452.28
26.89	56.85	1012.27	43.84	436.44
13.35	39.18	1023.24	61.98	469.34
23.91	67.69	1008.28	66.71	439.84
28.29	61.86	1011.87	64.17	438.25
14.27	41.48	1014.83	62.7	458.19
27.48	61.41	1012.2	45.06	452.24
34.03	73.56	1006.49	51.07	440.29
10.01	40.78	1023.71	88.11	470.82
14.09	41.66	1009.25	71.4	469.93
25.18	57.5	1015.07	60.76	449.01
8.63	39.96	1024.39	99.47	475.79
22.2	59.21	1017.87	73.34	445.29
20.58	39.53	1005.68	62.09	460.1
17.37	40.55	1001.19	71.42	460.97
29.97	73.06	1009.41	78.26	430.37
28.53	49.3	1003.83	59.69	438.17
14.5	39	1017.04	75.75	465.32
3.91	35.47	1016.92	86.03	488.67
17.51	39.54	1010.22	71.53	462.12
13.57	42.99	1007.51	88.95	472.04
7.55	38.08	1019.37	76.32	485.49
14.22	45.08	1023.26	84.41	466.47
15.51	36.71	1014.05	72.92	465.85
13.36	39.64	1010.3	93.26	471.89
7.73	37.8	1020.71	63.93	483.94
4.77	39.33	1011.32	68.98	494.91
27.37	76.09	1007.52	89.12	433.34
25.02	69.75	1010.04	91.86	437.87
6.14	40.62	1015.71	86.51	481.66
14.08	43.41	1015.59	54.15	466.99
17.37	58.49	1012.2	91.14	456.29
26.18	69.14	1006.54	85.95	436
21.35	58.16	1017.21	67.66	452.83
24.17	48.78	1018.08	75.14	440.96
16.61	50.9	1013.18	85.26	460.35
15.29	41.35	1006.32	82.56	466.27
20.27	63.09	1016.6	90.7	446.75
11.33	41.16	1019.05	87.13	468.87
27.24	69.13	1009.28	70.85	432.36
20.11	42.04	1010.79	60.31	464.13
22.5	59.54	1007.99	93.63	445.22
22.02	64.45	1012.57	47.87	454.9
21.14	69.94	1008.87	79.74	440.69
10.9	41.93	1014.96	96.24	477.93
20.08	49.69	1008.34	69.88	453.54
29.71	73.18	1012.35	63.06	427.04
10.94	40.81	1026.03	80.79	476.32
23.93	68.28	1005.16	69.91	444.95
15.69	37.87	1021.18	84.38	465.41
10.48	40	1021.35	88.52	478.86
27.78	72.43	1006.72	74.53	429.62
16.17	41.79	1005.78	78.8	454.72
32.39	79.74	1006.92	58.58	430.12
24.3	69.23	1013.17	59.91	440.56
29.56	74.22	1007.45	57.46	432.84
30.01	73.18	1012.23	60.9	429.84
16.44	44	1024.48	76.51	460.33
10.86	37.5	1013.36	75.56	473.75
28.18	73.88	1005.89	75.41	434.48
18.58	64.45	1009.68	67.57	444.28
28.69	67.79	1011.01	66.4	439.87
12.35	41.38	1021.99	55.38	474.94
32.26	71.29	1008.41	48.58	431.96
25.13	51.95	1005.42	62.05	447.7
19.22	62.1	1019.43	79.19	451.8
32.84	74.67	1015.89	31.81	430.88
24.66	57.43	1013.17	71.82	445.41
29.08	67.07	1005.73	57.18	435.57
24.92	60.95	1014.88	60.58	445.44
22.73	66.75	1018.13	84.06	437.93
32.16	68.14	1004.86	37.77	429.64
24.33	49.16	1003.46	61.04	441.2
10.95	40.22	1010.04	78.96	477.23
19.93	62.1	1019.94	76.41	450.57
26.62	71.73	1009.32	80.1	431.93
6.69	43.65	1020.14	69.55	482.57
29.18	71.43	1011.65	59.49	443.75
25.95	59.27	1010.9	70.42	444.19
6.91	39.37	1019.58	71.02	488.2
19.97	59.14	1016.05	70.58	450.06
14.81	39.58	1011.62	73.64	467.32
24.63	65.38	1010.43	40.68	446.23
19.68	62.96	1020.41	82.26	453.58
27.89	73.21	1001.32	85.88	431.59
12.82	43.5	1022.38	84.32	471.41
27.2	77.95	1009.48	78.53	433.39
23.55	65.12	1016.23	66.65	446.44
6.52	35.57	1025.37	78.32	486.06
24.01	63.56	1014.19	64.31	444.1
22.07	60.08	1017.68	71.23	452.56
14.01	42.99	1007.12	69.69	469.23
14.5	41.76	1023.94	84.42	464.23
10.09	37.14	1012.99	72.59	473.66
26.72	65.61	1014.41	52.01	442.48
29.44	64.33	1011.4	61.78	442.32
24.8	50.23	1016.62	63.13	453.56
29.45	68.27	1007.96	61.63	432.96
24.37	68.14	1005.22	59.27	440.22
14.87	42.77	1017.94	75.06	462.03
26.98	70.94	1007.99	68.16	434.73
26.02	59.57	1011.16	76.93	446.5
21.4	44.57	1005.7	73.09	445.09
14.02	41.78	1011.26	48.62	465.87
18.28	60.1	1009.72	85.79	452.93
19.64	44.6	1015.88	47.56	467.53
18.77	39.54	1009.39	63.35	458.58
19.24	58.33	1013.65	85.47	449.26
25.03	60.84	1017.69	59.23	441.58
18.92	46.93	1009.89	77.98	453.66
9.81	44.45	1021.19	90.55	471.32
4.97	42.85	1014.02	88.78	482.98
22.51	66.49	1014.59	63.03	453.08
21.75	49.82	1015.01	78.33	455.28
26.61	72.43	1007.71	75.82	427.61
12.12	40	1018.72	84.42	462.1
12.48	39.85	1012.93	60.23	477.17
20.01	56.65	1020.77	74.46	457.01
21.18	45.01	1012.57	48.05	451.62
9.68	38.16	1015.54	79.67	475.51
22.8	49.16	1006.4	77.05	439.65
11.62	41.54	1019.94	66.43	477.75
21.81	65.46	1013.97	52.16	444.66
8.16	39.3	1019.39	85.38	483.17
24.78	66.49	1010.55	68.12	436.62
6.25	40.02	1032.14	80.22	481.38
22.03	64.69	1007.21	75.75	440.92
13.08	44.9	1020.47	86.46	472.01
7.79	41.01	1024	97.2	477
14.77	39.16	1016.12	81.88	470.39
23.28	72.24	1011.3	90.5	434.21
18.59	44.63	1003.99	86.22	459.65
20.46	51.43	1007.31	93.25	444.88
24.2	59.43	1009.69	62.3	440.66
18.41	44.9	1008.97	73.81	453.12
18.77	58.66	1010.34	87.25	454.54
16.89	49.21	1015.19	70.39	458.25
14.95	39.31	1009.15	75.3	462.72
31.97	69.04	1008.5	47.69	441.18
5.85	40.77	1022.44	84.77	480.59
20.37	69.48	1011.04	84.31	445.81
5.52	39.33	1009.74	95.25	492.39
22.32	59.8	1016.82	64.18	451.21
22.87	71.29	1008.1	73.1	442.27
29.19	65.71	1013.85	50.5	444.49
6.91	37.49	1011.05	82.07	481.88
24.42	65.94	1011.25	65.04	439.63
24.35	58.49	1011.03	70.64	445.6
19.83	39.39	1013.73	59.16	463.72
22.25	60.84	1018.07	73.67	443.99
13.93	42.86	1032.37	71.11	468.88
9.11	40.64	1020.68	86.91	476.62
31.18	77.95	1014.89	65.62	431.58
9.53	38.38	1020.49	80.08	478.03
7.94	35.77	1017.04	63.22	480.38
5.41	45.87	1008.47	97.51	479.48
13.83	44.45	1021.5	68.75	462.6
13.9	40.2	1013.13	89.91	464.17
22.64	59.27	1012.58	83.55	446.2
18.72	60.07	1015.81	70.55	454.35
28.88	73.68	1015.25	47.73	432.93
11.42	40.43	1025.5	75.85	490.02
6.02	41.38	1021.2	88.71	490.57
10.86	44.85	1014.15	88.36	476.87
13.89	43.7	1015.12	64.99	470.88
19.38	54.9	1017.08	70.46	454.1
8.74	36.3	1015.18	61.97	438.63
16.01	49.64	1026.35	77.75	457.8
20.68	68.61	1011.2	84.81	446.33
15.3	41.76	1022.57	71.56	466.59
13.93	44.9	1022.15	85.93	470.59
14.91	46.9	1019.59	98.1	461.73
7.24	41.17	1020.35	80.56	486.76
15.75	36.99	1007.67	93.8	464.38
10.12	43.72	1011.33	97.62	473.05
20.85	59.21	1012.9	75.97	444.44
23.29	62.91	1013.35	68.25	444.61
14.59	35.71	1015.19	54.13	469.32
29.96	67.83	1008	44.05	433.13
25.62	58.82	1010.02	70.31	444.14
28.62	79.74	1008.12	65.39	436.12
23.72	66.48	1003.61	73.75	436.62
20.89	70.32	1011.22	89.68	442.5
11.82	41.17	1019.5	55.74	475.61
3	39.64	1011	80.14	485.2
29.7	67.17	1007.31	66.56	438.04
21.35	57.76	1017.36	73.1	452.57
27.2	78.05	1010.15	90.2	430.55
22.75	70.94	1008.03	81.95	439.91
10.56	41.54	1019.92	78.95	479.33
22.43	63.94	1012.76	93.24	444.53
10.1	41.4	1024.29	85.94	474.28
26.85	66.86	1006.78	69.4	438.26
14.02	40.1	1015.56	82.44	467.32
21.69	47.45	1007.56	77.2	447.06
8.86	40.23	1017.57	90.47	478.05
33.12	68.31	1010.3	42.29	441.13
12.1	44.77	1019.1	75.85	463.11
5.74	45.87	1011.44	95.94	482
9.55	41.44	1015.07	85.94	481.75
5.89	39.48	1005.11	59.83	484.91
17.9	67.71	1004.3	89.59	449.73
20.58	49.15	1021.42	56.15	453.87
26.38	69.88	1008.42	86.25	432.25
27.62	71.14	1011.6	52.8	434.72
28.99	54.2	1012.79	41.9	442.6
17.72	50.9	1012.02	85.55	456.4
28.36	60.23	1010.05	53.03	441.08
22.98	69.84	1005.55	84.1	437.49
23.25	71.29	1008.05	71.36	442.21
28.15	71.25	1000.51	81.04	431.28
10.81	44.63	1020.61	88.29	473.86
22.68	50.78	1008.83	70.3	447.69
9.2	40.03	1017.05	92.46	480.38
20.52	57.76	1017.03	81.19	453.64
27.92	68.3	1015.02	51.04	437.28
25.16	47.01	1014.99	64	452.64
25.52	67.17	1007.33	85.12	440.02
12.09	38.25	1013.61	81.28	469.29
30.56	71.98	1004.74	58.77	429.2
23.76	61.5	1009.15	68.52	441.16
18.75	44.9	1007.99	75.76	452.77
12.84	40.8	1026.95	69.86	475.59
20.01	68.63	1012.34	69.49	454.5
9.66	41.82	1033.19	73.19	477.67
26.93	75.23	1010.19	62.12	434.1
13.79	45.08	1025.02	84.36	469.55
22.82	69.94	1004.65	73.47	437.32
20.69	50.78	1008.71	91.95	447.58
21.89	74.78	1010.35	80.39	444.6
26.45	69.13	1001.53	89.64	427.5
28.18	77.54	1011.99	74.72	430.55
9.07	40.67	1014.41	70.39	484.5
25.38	70.94	1007.87	73.59	446.31
11.2	41.38	1021.65	61.89	476.87
14.45	52.75	1023.97	63.59	459.85
28.84	60.23	1009.7	59	437.82
18.13	49.39	1021.29	82.52	458.53
20.87	57.19	1006.5	77	445.95
16.32	43.14	1014.72	70.43	465.38
25.35	72.99	1007.65	84.09	436.29
30.61	68.84	1011.18	52.5	439.9
29.76	73.56	1008.07	84.85	432.51
16.64	43.14	1019.03	82.88	459
16.77	42.28	1007.53	73.19	465.52
27.2	65.18	1011.47	47.14	436.99
17.32	41.67	1013.23	68.07	462.74
25.79	65.27	1013.26	55.35	440.04
19.08	58.59	1013.42	68.88	451.05
4.84	38.5	1011.96	81.62	491.23
26.08	48.6	1003.61	57.8	438.61
17.46	62.1	1019.96	83.99	451.06
16.41	47.24	1015.75	88.78	457.94
10.39	40.22	1004.95	91.65	476.49
13.13	40.75	1016.05	80.87	472.5
13.67	41.48	1017.51	63.54	463.97
7.09	43.13	1017.91	92.37	485.04
10.52	41.48	1018	68.99	469.8
21.26	60.84	1018.43	78.83	446.08
5.79	45.87	1010.23	95.41	480.97
8.42	40.64	1022.35	96.38	476.29
24.78	68.63	1013.96	43.7	448.43
23.58	70.04	1010.95	76.32	435.47
28.08	73.42	1012.17	62.74	434
4.95	42.07	1004.87	80.88	485.67
24.19	46.93	1013.4	49.39	446.3
9.88	40	1021.4	92.06	481.58
29.29	72.58	1007.39	72.85	428.73
4.04	35.47	1017.51	87.35	486.86
7.38	41.22	1016.47	96.29	485.73
10.58	42.34	1022.32	94.01	474.91
27.02	72.58	1009.21	89.13	437.8
6.4	39.9	1007.75	86.55	486.03
10.46	41.06	1021.41	82.34	481.47
30.61	67.69	1004.97	47.46	429.8
29.83	71.98	1004.32	67.55	426.98
31.77	76.09	1007.4	73.36	431.69
8.35	40.46	1019.23	73.26	474.79
31.75	74.99	1003.25	53.33	430.82
5	40.64	1021.05	94.84	485.27
25.26	74.33	1014.79	79.56	433.49
6.1	39.33	1010.4	95.34	491.37
7.24	41.17	1020.35	80.56	486.76
10.52	42.18	1014.9	95.67	469.03
15.66	41.35	1001.68	86.26	463.57
10.41	36.71	1022.02	84.56	474.2
21.08	44.05	1008.13	72.52	449.6
23.59	58.62	1017.81	66.68	448.09
21.53	58.05	1012.9	87.57	447.93
10.67	40.56	1022.39	77.92	482.36
14.31	40.78	1024.3	76.41	463.54
28.74	70.32	1008.15	45.99	431.93
29.15	69.48	1008.68	55.78	430.54
18.85	44.63	1009.06	84.75	456.72
6.93	41.14	1027.18	84.67	479.06
24.27	70.47	1008.96	78.31	434.24
13.35	41.16	1011.32	89.12	474.57
10.8	39.28	1010.7	82.62	478.8
22	51.3	1012.87	85.79	450.18
7.67	41.66	1016.25	77	485.03
4.62	38.44	1016.09	73.14	486.84
12.59	39.72	1017.76	61.14	470.18
23.49	49.3	1003.35	77.96	442.76
19.83	51.43	1007.36	91.64	449.45
29.26	69.34	1009.76	58.64	435.32
9.78	40.03	1017.33	92.11	480.59
16	43.02	1012.37	39.2	466.01
18.76	56.53	1020.04	86.62	452.5
19.82	63.9	1013.19	78.96	449.61
21.7	49.02	1008.74	82.8	446.46
27.28	72.58	1009.21	89.96	431.27
22.56	70.98	1005.66	95.95	440.81
30.72	71.58	1009.98	50.39	430.46
21.87	49.39	1019.99	67.05	451.97
8.85	40.22	1008.61	90.6	482.3
11.58	39.69	1005.17	86.55	469.6
25.66	61.08	1013	71.21	446.05
14.16	44.58	1020.75	77.42	473.22
7.92	39.54	1011.51	84.41	481.44
24.42	57.32	1011.46	55.92	443.94
30.18	61.5	1009.8	36.81	436.92
21.85	58.33	1013.03	66.39	447.31
30.56	72.39	999.96	69.81	430.85
7.78	40.8	1026.7	85.61	488.54
13.21	45.87	1008.58	85.66	463.1
20.25	58.33	1013.25	68.92	448.93
14.39	42.77	1017.36	83.28	463.65
21.92	49.02	1009.29	88.56	443.31
30.67	71.29	1008.36	52.08	430.28
23.6	57.17	1009.84	74.27	446.05
10.62	42.02	999.83	96.66	472.41
9.79	39.69	1002.36	93.86	471.61
13.69	34.03	1018.45	65.76	469.12
24.11	66.51	1015.35	56.01	437.21
20.68	42.04	1010.2	63.43	464.14
26.3	51.43	1012.05	63.62	442.28
25.7	69.45	1013.86	56.91	437.04
19.46	42.04	1011.3	60.45	466.24
11.49	41.54	1020.17	70.91	476.74
33.17	70.4	1004.45	58	430.14
13.46	41.4	1019.46	71.73	467.4
27.34	70.98	1008.82	71.42	438.73
24.2	64.33	1011.15	84.23	442.78
20.96	69.48	1011.04	82.63	444.31
28.82	71.8	1010.97	67.64	436.71
9.27	36.3	1026.93	72.13	479.66
11.48	36.18	1017.03	61.62	469.44
14	40.8	1026.17	54.82	474.87
13.03	41.26	1022.17	79.79	466.02
28.18	71.85	1008.78	82.88	427.83
12.77	40.71	1014.66	72.81	471.59
28.15	71.94	1006.73	68.21	427.69
22.65	60.93	1006.43	85.13	440.52
25.64	50.05	1006.97	67.72	440.86
21.94	57.5	1014.64	78.52	451.1
22.95	67.79	1009.89	91.69	442.19
5.21	41.31	1003.51	91.23	486.46
17.02	44.85	1014.38	62.66	459.98
33.18	72.29	1009.51	58.35	435.26
29.85	61.85	1005.45	61.85	436.46
26.56	65.59	1012.6	64.25	443.66
21.42	43.79	1015.76	43.08	462.19
23.86	63.77	1014.6	82.37	440.58
14.34	42.86	1031.75	66.81	466.17
30.36	69.82	1010.02	54.22	439.05
18.12	43.69	1016.91	52.95	464.68
28.53	68.08	1013.27	42.53	438.91
23.62	61.87	1010.07	48.77	447.93
22.81	58.96	1013.5	55.66	452.89
26.36	73.68	1013.99	86.44	430.39
29.3	73.67	1005.64	65.31	431.07
24.26	69.51	1013.43	53.23	442.56
26.85	71.73	1010.06	65.24	429.97
26.91	71.64	1004.59	83.54	438.73
24.47	70.94	1008.07	81.55	436.29
18.06	65.48	1018.79	77.95	454.34
26.05	44.89	1009.83	56.36	443.18
30.01	62.34	1005.28	62.34	435.94
23.08	64.44	1014.85	69.95	448.61
9.86	42.49	1009.16	81.41	477.78
11.44	41.39	1019.59	79.95	478.52
12.9	43.41	1015.92	59.15	464.26
13.44	42.34	1018	96.65	459.6
33.37	79.05	1007.19	62.64	430.42
28.82	65.71	1014.24	54.3	449.18
23.62	49.21	1014.1	49.54	443.53
18.65	52.08	1005.48	99.94	449.55
6.81	38.56	1016.5	70.99	487.45
19.04	43.43	1009.25	68.74	453.32
19.32	52.9	1016.86	68.2	457.66
6.64	35.19	1019.83	76.01	484.03
21.71	65.27	1013.24	63.58	444.91
16.46	48.6	1006.08	89	449.58
7.5	38.06	1021.96	83.45	485.98
24.27	74.93	1012.73	73.81	443.06
16	43.34	1013.58	78.87	461.7
17.28	65.94	1013.62	89.97	454.76
27.18	71.06	1008.16	86.32	430.66
14.18	42.99	1007.19	73.21	468.35
28.5	76.86	999.49	77.47	430.62
32.5	73.68	1014.65	55.72	427.63
21.89	58.62	1016.15	74.59	450.05
23.18	59.04	1011.44	79.28	443.12
24.07	73.46	1006.61	73.46	438.41
25.31	65.59	1011.16	79.71	440.96
25.15	68.51	1013.25	72.31	440.96
9.45	41.92	1029.32	91.09	467.79
27.01	67.98	1006.01	67.98	434.65
20.01	59.87	1019	84.12	448.39
18.36	51.43	1010.57	90.17	459.8
28.12	58.33	1013.61	39.67	448.72
18.18	61.87	1008.64	66.28	453.1
23.72	58.62	1016.32	71.17	447.13
27.17	61.25	1013.03	70.43	435.9
6.03	40.78	1025.53	98.68	480.36
22.58	58.12	1014.88	80.59	448.32
23.75	61.5	1008.16	69.14	442.35
26.33	64.45	1013.12	43.31	450.67
18.21	39.54	1009.81	70.92	461.73
22.06	43.43	1010.46	58.01	448.92
17.39	42.44	1013.72	73.79	461.55
9.3	40.56	1022.64	76.14	479.87
34.24	74.67	1016.24	25.56	425.58
7.17	41.92	1031.97	83.86	485.08
22.99	68.67	1006.65	77.62	446.67
22.02	69.45	1013.84	75.75	440.26
23.94	59.39	1014.32	74.55	438.64
22.28	58.86	1014.08	66.47	446.55
12.5	45.51	1015.8	82.82	469.69
18.19	44.06	1017.24	78.73	456.13
18.2	39.63	1005.35	79.05	468.49
13.06	44.2	1018.95	85.68	469.02
9.68	39.61	1015.63	74.5	475.02
29.25	69.13	1010.27	67.35	426.29
14.76	40.71	1017.37	71.07	465.58
10.94	39.69	1004.5	86.29	459.69
18.41	62.1	1020.4	78.1	457.14
30.04	67.25	1017.57	38.14	434.83
7.9	43.79	1016.14	83.05	485.26
22.05	59.92	1009.06	93.74	437.9
29.19	70.32	1008.28	55.42	427.9
24.16	60.29	1018.09	63.49	446.17
29.75	70.32	1007.35	55.8	427.2
22.73	63.73	1009.12	94.8	441.75
12.95	40.1	1015.31	86.01	471.07
10.54	41.93	1016.64	93.52	479.65
11.95	42.07	1018.52	84.73	467.91
16.81	45.87	1008.7	98	455.96
18.89	63.09	1018.47	84.85	450
11.89	40.64	1021.29	97.16	476.99
13.91	40.24	1017.03	85.93	466.24
28.59	75.08	1005.58	60.3	442.7
22.25	66.54	1004.64	89.15	437.19
24.04	51.95	1006.13	73.92	450.07
25.86	61.08	1013.51	67.5	449.67
27.91	72.24	1010.74	70.8	430.73
24.23	56.89	1012.32	68.04	441.29
8.69	40.81	1026.19	86.25	484.55
29.78	73.42	1011.27	52.79	445.58
13.52	41.44	1015.81	65.97	472.11
16.14	44.21	1020.36	80.59	461.03
25.87	63.47	1011.54	65.45	445.87
16.71	46.18	1011.61	95.82	459.4
18.84	67.32	1012.63	81.89	449.21
25.98	73.18	1012.28	85.78	439.73
14.93	39.39	1014.31	80.68	468.88
25.89	74.22	1007.43	81.55	433.73
8.82	43.56	1014.95	81.54	482.71
29.93	71.85	1008.43	66.64	426.82
16.51	51.86	1022.37	81.18	442.48
20.92	70.02	1011.06	85.63	437.96
22.98	73.17	1011.94	90.13	438.5
30.2	71.8	1011.13	60.66	436.94
25.03	59.21	1017.28	56.96	446.33
30.02	68.24	1009.8	65.73	429.5
18.87	43.43	1009.16	69.5	454.58
22.4	70.94	1008.06	84.52	440.04
5.07	40.07	1019.32	66.17	494.87
12.85	41.14	1027.04	86.29	464.86
26.74	59.87	1012.5	62.88	447.88
17.44	45.01	1013.65	75.13	456.08
27.56	63.9	1013.23	45.97	442.43
14.08	40.1	1015.48	82.81	469.33
12.83	44.88	1017.86	87.88	474.26
15.93	40.89	1011.57	74.55	468.8
30.05	69.34	1008.26	61.5	436.82
27.69	69.71	1009.9	69.91	440.43
14.91	43.34	1015.15	81.56	461.27
11.92	40.62	1016.66	55.25	468.14
30.85	70.94	1007.47	54.79	431.77
25.57	44.05	1005.79	65.14	443.84
10.55	41.55	1005.02	63.24	473.99
12.88	40.64	1020.76	92.58	474.58
13.03	39.52	1016.68	83.09	473.99
15.62	58.59	1013.91	97.6	457.3
14.4	40.2	1013.04	90.5	464.5
9.86	37.83	1005.05	100.15	472.46
23.84	63.47	1012.54	76.33	444.48
22.53	58.62	1016.28	72.78	449.02
7.18	38.56	1016.49	70.37	487.63
13.68	44.47	1027.81	69.53	469.37
25.41	65.12	1016.01	53.39	442.86
25.24	68.28	1000.26	78.17	435.9
28.01	44.89	1008.98	48.52	444.76
26.87	69.23	1012.71	54.54	433.89
14.01	39	1016.73	79.23	466.7
16.23	43.52	1020.13	76.3	464.74
7.06	41.38	1021.94	83.55	487.71
11.72	41.54	1020.04	66.84	476.12
14.14	43.34	1017.1	81.77	464.36
12.45	40.1	1015.4	82.61	473.63
27.72	69.88	1007.58	72.25	434.02
3.2	41.31	997.67	98.84	489.86
12.12	38.28	1013.65	90.19	471.19
19.95	57.25	1011.08	88.04	453.03
9.33	42.49	1008.93	82.59	478.43
14.87	54.3	1017.17	71.57	462.87
25.45	57.32	1011.7	47.09	441.3
16.23	43.69	1016.4	68.9	466.22
20.09	61.27	1020.05	70.71	451.43
16.66	36.71	1013.68	70.66	466.07
12.26	43.48	1016.41	72.95	467.83
23.32	69.23	1011.75	75.59	436.18
24.88	49.16	1006.04	64.54	445.18
15.38	43.99	1022.42	83.41	462.48
18.16	39.99	1007.73	70.54	463.69
27.26	66.56	1007.83	60.95	434.88
7.41	40.71	1023.07	83.32	474.25
2.34	39.42	1028.47	69.68	490.34
13.96	40.83	1009.89	84.86	469.86
29.91	74.9	1003.36	69.34	434.93
10.02	39.66	1016.34	79.98	480.05
27.71	75.23	1010.21	59.75	440.7
12.54	40.1	1015.73	84.29	475.02
17.66	44.9	1020.5	71.33	457.11
11.6	40.69	1015.51	86.55	474.99
28.42	75.23	1010.25	56.8	435.64
16.22	50.88	1014.33	100.09	454.94
18.21	41.85	1014.67	56.86	468.4
12.78	44.6	1013.64	77.56	468.67
29.82	43.21	1011.52	63.54	433.31
25.58	64.45	1011.07	61.47	447.16
30.22	68.3	1014.91	34.9	434.3
20.06	62.1	1020.21	72.21	451.81
29.07	71.64	1006.07	69.53	440.51
31.46	71.29	1008.57	41.79	430.8
20.98	60.1	1011.07	79.44	450.95
27.44	66.56	1005.51	69.28	428
26.99	62.26	1011.13	71.27	436.89
29.1	73.9	1007.47	59.48	436.56
6.92	41.26	1011.16	96.2	483.61
14.26	44.2	1019.81	76.46	462.87
26.44	54.2	1012.65	48.02	444.78
15.85	49.69	1015.48	88.65	464.72
15.55	42.03	1017.41	74.58	460.84
19.18	50.12	1005.99	100.09	444.56
11.87	41.78	1012.97	64.79	470.84
10.53	40.64	1020.62	98.43	477.99
14.54	43.14	1010.26	82.98	465.45
14.77	44.47	1028.38	71.18	464.25
21.79	61.45	1011.11	91.78	446.99
10.62	39.96	1025.37	96.64	470.8
14.72	38.91	1015.17	61.75	468.87
26.38	66.49	1013.89	43.06	442.38
8.85	40.43	1025.68	80.42	491.81
29.45	75.6	1018.12	50.68	437.31
30.39	71.8	1010.87	64.11	435.82
21.99	57.5	1015.87	80.72	446.96
16.48	68.28	1004.27	99.89	449.7
19.32	52.84	1004.29	83.51	450.88
29.49	69.71	1009.34	56.35	440.99
22.86	66.48	1003.77	71.22	435.56
30.29	71.58	1010.01	54.03	434.27
22.21	60.77	1018.21	84.96	444.57
26.48	73.06	1008.07	90.73	433.31
23.7	62.91	1012.26	57.89	444.99
24.34	73.5	1011.31	84.15	440.29
3.6	35.19	1018.73	99.1	488.98
13.47	43.34	1012.75	87.04	468.8
37.11	68.94	1006.23	31.15	429.25
33.43	69.88	1006.86	44.84	435.59
11.11	40.55	1023.91	87.12	476.37
11.87	44.6	1018.81	84.68	468.47
27.6	69.05	1003.87	42.01	436.08
13.74	39.35	1014.82	77.48	471.11
5.41	40.07	1019.16	64.77	495.24
[truncated: 7,568 more rows]
