# Supplementary material
Source: ML conference proceedings conference paper supplement (https://proceedings.mlr.press/v108/ishibashi20a.html)
Supplement: Supplementary file 2 [file ishibashi20a-supp.zip › 137_supp/program/dataset/power_plant/Folds5x2_pp.ods]

## Sheet: Sheet1
AT	V	AP	RH	PE
14.96	41.76	1024.07	73.17	463.26
25.18	62.96	1020.04	59.08	444.37
5.11	39.4	1012.16	92.14	488.56
20.86	57.32	1010.24	76.64	446.48
10.82	37.5	1009.23	96.62	473.9
26.27	59.44	1012.23	58.77	443.67
15.89	43.96	1014.02	75.24	467.35
9.48	44.71	1019.12	66.43	478.42
14.64	45	1021.78	41.25	475.98
11.74	43.56	1015.14	70.72	477.5
17.99	43.72	1008.64	75.04	453.02
20.14	46.93	1014.66	64.22	453.99
24.34	73.5	1011.31	84.15	440.29
25.71	58.59	1012.77	61.83	451.28
26.19	69.34	1009.48	87.59	433.99
21.42	43.79	1015.76	43.08	462.19
18.21	45	1022.86	48.84	467.54
11.04	41.74	1022.6	77.51	477.2
14.45	52.75	1023.97	63.59	459.85
13.97	38.47	1015.15	55.28	464.3
17.76	42.42	1009.09	66.26	468.27
5.41	40.07	1019.16	64.77	495.24
7.76	42.28	1008.52	83.31	483.8
27.23	63.9	1014.3	47.19	443.61
27.36	48.6	1003.18	54.93	436.06
27.47	70.72	1009.97	74.62	443.25
14.6	39.31	1011.11	72.52	464.16
7.91	39.96	1023.57	88.44	475.52
5.81	35.79	1012.14	92.28	484.41
30.53	65.18	1012.69	41.85	437.89
23.87	63.94	1019.02	44.28	445.11
26.09	58.41	1013.64	64.58	438.86
29.27	66.85	1011.11	63.25	440.98
27.38	74.16	1010.08	78.61	436.65
24.81	63.94	1018.76	44.51	444.26
12.75	44.03	1007.29	89.46	465.86
24.66	63.73	1011.4	74.52	444.37
16.38	47.45	1010.08	88.86	450.69
13.91	39.35	1014.69	75.51	469.02
23.18	51.3	1012.04	78.64	448.86
22.47	47.45	1007.62	76.65	447.14
13.39	44.85	1017.24	80.44	469.18
9.28	41.54	1018.33	79.89	482.8
11.82	42.86	1014.12	88.28	476.7
10.27	40.64	1020.63	84.6	474.99
22.92	63.94	1019.28	42.69	444.22
16	37.87	1020.24	78.41	461.33
21.22	43.43	1010.96	61.07	448.06
13.46	44.71	1014.51	50	474.6
9.39	40.11	1029.14	77.29	473.05
31.07	73.5	1010.58	43.66	432.06
12.82	38.62	1018.71	83.8	467.41
32.57	78.92	1011.6	66.47	430.12
8.11	42.18	1014.82	93.09	473.62
13.92	39.39	1012.94	80.52	471.81
23.04	59.43	1010.23	68.99	442.99
27.31	64.44	1014.65	57.27	442.77
5.91	39.33	1010.18	95.53	491.49
25.26	61.08	1013.68	71.72	447.46
27.97	58.84	1002.25	57.88	446.11
26.08	52.3	1007.03	63.34	442.44
29.01	65.71	1013.61	48.07	446.22
12.18	40.1	1016.67	91.87	471.49
13.76	45.87	1008.89	87.27	463.5
25.5	58.79	1016.02	64.4	440.01
28.26	65.34	1014.56	43.4	441.03
21.39	62.96	1019.49	72.24	452.68
7.26	40.69	1020.43	90.22	474.91
10.54	34.03	1018.71	74	478.77
27.71	74.34	998.14	71.85	434.2
23.11	68.3	1017.83	86.62	437.91
7.51	41.01	1024.61	97.41	477.61
26.46	74.67	1016.65	84.44	431.65
29.34	74.34	998.58	81.55	430.57
10.32	42.28	1008.82	75.66	481.09
22.74	61.02	1009.56	79.41	445.56
13.48	39.85	1012.71	58.91	475.74
25.52	69.75	1010.36	90.06	435.12
21.58	67.25	1017.39	79	446.15
27.66	76.86	1001.31	69.47	436.64
26.96	69.45	1013.89	51.47	436.69
12.29	42.18	1016.53	83.13	468.75
15.86	43.02	1012.18	40.33	466.6
13.87	45.08	1024.42	81.69	465.48
24.09	73.68	1014.93	94.55	441.34
20.45	69.45	1012.53	91.81	441.83
15.07	39.3	1019	63.62	464.7
32.72	69.75	1009.6	49.35	437.99
18.23	58.96	1015.55	69.61	459.12
35.56	68.94	1006.56	38.75	429.69
18.36	51.43	1010.57	90.17	459.8
26.35	64.05	1009.81	81.24	433.63
25.92	60.95	1014.62	48.46	442.84
8.01	41.66	1014.49	76.72	485.13
19.63	52.72	1025.09	51.16	459.12
20.02	67.32	1012.05	76.34	445.31
10.08	40.72	1022.7	67.3	480.8
27.23	66.48	1005.23	52.38	432.55
23.37	63.77	1013.42	76.44	443.86
18.74	59.21	1018.3	91.55	449.77
14.81	43.69	1017.19	71.9	470.71
23.1	51.3	1011.93	80.05	452.17
10.72	41.38	1021.6	63.77	478.29
29.46	71.94	1006.96	62.26	428.54
8.1	40.64	1020.66	89.04	478.27
27.29	62.66	1007.63	58.02	439.58
17.1	49.69	1005.53	81.82	457.32
11.49	44.2	1018.79	91.14	475.51
23.69	65.59	1010.85	88.92	439.66
13.51	40.89	1011.03	84.83	471.99
9.64	39.35	1015.1	91.76	479.81
25.65	78.92	1010.83	86.56	434.78
21.59	61.87	1011.18	57.21	446.58
27.98	58.33	1013.92	54.25	437.76
18.8	39.72	1001.24	63.8	459.36
18.28	44.71	1016.99	33.71	462.28
13.55	43.48	1016.08	67.25	464.33
22.99	46.21	1010.71	60.11	444.36
23.94	59.39	1014.32	74.55	438.64
13.74	34.03	1018.69	67.34	470.49
21.3	41.1	1001.86	42.75	455.13
27.54	66.93	1017.06	55.2	450.22
24.81	63.73	1009.34	83.61	440.43
4.97	42.85	1014.02	88.78	482.98
15.22	50.88	1014.19	100.12	460.44
23.88	54.2	1012.81	64.52	444.97
33.01	68.67	1005.2	51.41	433.94
25.98	73.18	1012.28	85.78	439.73
28.18	73.88	1005.89	75.41	434.48
21.67	60.84	1017.93	81.63	442.33
17.67	45.09	1014.26	51.92	457.67
21.37	57.76	1018.8	70.12	454.66
28.69	67.25	1017.71	53.83	432.21
16.61	43.77	1012.25	77.23	457.66
27.91	63.76	1010.27	65.67	435.21
20.97	47.43	1007.64	71.18	448.22
10.8	41.66	1013.79	81.96	475.51
20.61	62.91	1013.24	79.54	446.53
25.45	57.32	1011.7	47.09	441.3
30.16	69.34	1007.67	57.69	433.54
4.99	39.04	1020.45	78.89	472.52
10.51	44.78	1012.59	85.29	474.77
33.79	69.05	1001.62	40.13	435.1
21.34	59.8	1016.92	77.06	450.74
23.4	65.06	1014.32	67.38	442.7
32.21	68.14	1003.34	62.44	426.56
14.26	42.32	1016	77.43	463.71
27.71	66.93	1016.85	58.77	447.06
21.95	57.76	1018.02	67.72	452.27
25.76	63.94	1018.49	42.14	445.78
23.68	68.3	1017.93	84.16	438.65
8.28	40.77	1011.55	89.79	480.15
23.44	62.52	1016.46	67.21	447.19
25.32	48.41	1008.47	72.14	443.04
3.94	39.9	1008.06	97.49	488.81
17.3	57.76	1016.26	87.74	455.75
18.2	49.39	1018.83	96.3	455.86
21.43	46.97	1013.94	61.25	457.68
11.16	40.05	1014.95	88.38	479.11
30.38	74.16	1007.44	74.77	432.84
23.36	62.52	1016.18	68.18	448.37
21.69	47.45	1007.56	77.2	447.06
23.62	49.21	1014.1	49.54	443.53
21.87	61.45	1011.13	92.22	445.21
29.25	66.51	1015.53	33.65	441.7
20.03	66.86	1013.05	64.59	450.93
18.14	49.78	1002.95	100.09	451.44
24.23	56.89	1012.32	68.04	441.29
18.11	44.85	1014.48	48.94	458.85
6.57	43.65	1018.24	74.47	481.46
12.56	43.41	1016.93	81.02	467.19
13.4	41.58	1020.5	71.17	461.54
27.1	52.84	1006.28	53.85	439.08
14.28	42.74	1028.79	70.67	467.22
16.29	44.34	1019.49	59.36	468.8
31.24	71.98	1004.66	57.17	426.93
10.57	37.73	1024.36	70.29	474.65
13.8	44.21	1022.93	83.37	468.97
25.3	71.58	1010.18	87.36	433.97
18.06	50.16	1009.52	100.09	450.53
25.42	59.04	1011.98	68.78	444.51
15.07	40.69	1015.29	70.98	469.03
11.75	71.14	1019.36	75.68	466.56
20.23	52.05	1012.15	47.49	457.57
27.31	59.54	1006.24	71.99	440.13
28.57	69.84	1003.57	66.55	433.24
17.9	43.72	1008.64	74.73	452.55
23.83	71.37	1002.04	64.78	443.29
27.92	74.99	1005.47	75.13	431.76
17.34	44.78	1007.81	56.38	454.97
17.94	63.07	1012.42	94.35	456.7
6.4	39.9	1007.75	86.55	486.03
11.78	39.96	1011.37	82.95	472.79
20.28	57.25	1010.12	88.42	452.03
21.04	54.2	1012.26	85.61	443.41
25.11	67.32	1014.49	58.39	441.93
30.28	70.98	1007.51	74.28	432.64
8.14	36.24	1013.15	87.85	480.25
16.86	39.63	1004.47	83.5	466.68
6.25	40.07	1020.19	65.24	494.39
22.35	54.42	1012.46	75.01	454.72
17.98	56.85	1012.28	84.52	448.71
21.19	42.48	1013.43	80.52	469.76
20.94	44.89	1009.64	75.14	450.71
24.23	58.79	1009.8	75.75	444.01
19.18	58.2	1017.46	76.72	453.2
20.88	57.85	1012.39	85.47	450.87
23.67	63.86	1019.67	57.95	441.73
14.12	39.52	1018.41	78.32	465.09
25.23	64.63	1020.59	52.2	447.28
6.54	39.33	1011.54	93.69	491.16
20.08	62.52	1017.99	75.74	450.98
24.67	63.56	1013.75	67.56	446.3
27.82	79.74	1008.37	69.46	436.48
15.55	42.03	1017.41	74.58	460.84
24.26	69.51	1013.43	53.23	442.56
13.45	41.49	1020.19	88.72	467.3
11.06	40.64	1021.47	96.16	479.13
24.91	52.3	1008.72	68.26	441.15
22.39	59.04	1011.78	86.39	445.52
11.95	40.69	1015.62	85.34	475.4
14.85	40.69	1014.91	72.64	469.3
10.11	41.62	1017.17	97.82	463.57
23.67	68.67	1006.71	77.22	445.32
16.14	44.21	1020.36	80.59	461.03
15.11	43.13	1014.99	46.91	466.74
24.14	59.87	1018.47	57.76	444.04
30.08	67.25	1017.6	53.09	434.01
14.77	44.9	1020.5	84.31	465.23
27.6	69.34	1009.63	71.58	440.6
13.89	44.84	1023.66	92.97	466.74
26.85	75.6	1017.43	74.55	433.48
12.41	40.96	1023.36	78.96	473.59
13.08	41.74	1020.75	64.44	474.81
18.93	44.06	1017.58	68.23	454.75
20.5	49.69	1009.6	70.81	452.94
30.72	69.13	1009.94	61.66	435.83
7.55	39.22	1014.53	77.76	482.19
13.49	44.47	1030.46	69.49	466.66
15.62	40.12	1013.03	96.26	462.59
24.8	64.63	1020.69	55.74	447.82
10.03	41.62	1014.55	95.61	462.73
22.43	63.21	1012.06	84.75	447.98
14.95	39.31	1009.15	75.3	462.72
24.78	58.46	1016.82	67.5	442.42
23.2	48.41	1008.64	80.92	444.69
14.01	39	1016.73	79.23	466.7
19.4	64.63	1020.38	81.1	453.84
30.15	67.32	1013.83	32.8	436.92
6.91	36.08	1021.82	84.31	486.37
29.04	60.07	1015.42	46.15	440.43
26.02	63.07	1010.94	53.96	446.82
5.89	39.48	1005.11	59.83	484.91
26.52	71.64	1008.27	75.3	437.76
28.53	68.08	1013.27	42.53	438.91
16.59	39.54	1007.97	70.58	464.19
22.95	67.79	1009.89	91.69	442.19
23.96	47.43	1008.38	63.55	446.86
17.48	44.2	1018.89	61.51	457.15
6.69	43.65	1020.14	69.55	482.57
10.25	41.26	1007.44	98.08	476.03
28.87	72.58	1008.69	79.34	428.89
12.04	40.23	1018.07	81.28	472.7
22.58	52.3	1009.04	78.99	445.6
15.12	52.05	1014.63	80.38	464.78
25.48	58.95	1017.02	51.16	440.42
27.87	70.79	1003.96	72.17	428.41
23.72	70.47	1010.65	75.39	438.5
25	59.43	1007.84	68.91	438.28
8.42	40.64	1022.35	96.38	476.29
22.46	58.49	1011.5	70.54	448.46
29.92	57.19	1008.62	45.8	438.99
11.68	39.22	1017.9	57.95	471.8
14.04	42.44	1012.74	81.89	471.81
19.86	59.14	1016.12	69.32	449.82
25.99	68.08	1013.13	59.14	442.14
23.42	58.79	1009.74	81.54	441.46
10.6	40.22	1011.37	85.81	477.62
20.97	61.87	1011.45	65.41	446.76
14.14	39.82	1012.46	81.15	472.52
8.56	40.71	1021.27	95.87	471.58
24.86	72.39	1001.15	90.24	440.85
29	77.54	1011.33	75.13	431.37
27.59	71.97	1008.64	88.22	437.33
10.45	40.71	1015.68	81.48	469.22
8.51	40.78	1023.51	89.84	471.11
29.82	66.51	1010.98	43.57	439.17
22.56	62.26	1012.11	63.16	445.33
11.38	39.22	1018.62	57.14	473.71
20.25	57.76	1016.28	77.76	452.66
22.42	59.43	1007.12	90.56	440.99
14.85	38.91	1014.48	60.98	467.42
25.62	58.82	1010.02	70.31	444.14
19.85	56.53	1020.57	74.05	457.17
13.67	54.3	1015.92	75.42	467.87
24.39	70.72	1009.78	82.25	442.04
16.07	44.58	1019.52	67.95	471.36
11.6	39.1	1009.81	100.09	460.7
31.38	70.83	1010.35	47.28	431.33
29.91	76.86	998.59	72.41	432.6
19.67	59.39	1014.07	77.67	447.61
27.18	64.79	1016.27	63.7	443.87
21.39	52.3	1009.2	79.77	446.87
10.45	41.01	1020.57	93.84	465.74
19.46	56.89	1014.02	84.95	447.86
23.55	62.96	1020.16	70.16	447.65
23.35	63.47	1011.78	84.24	437.87
9.26	41.66	1016.87	73.32	483.51
10.3	41.46	1018.21	86.17	479.65
20.94	58.16	1016.88	65.43	455.16
23.13	71.25	1002.49	94.59	431.91
12.77	41.5	1014.13	86.8	470.68
28.29	69.13	1009.29	58.18	429.28
19.13	59.21	1018.32	89.66	450.81
24.44	73.5	1011.49	87.39	437.73
20.32	44.6	1015.16	36.35	460.21
20.54	69.05	1001.6	79.62	442.86
12.16	45	1021.51	50.52	482.99
28.09	65.27	1013.27	51.96	440
9.25	41.82	1033.25	74.73	478.48
21.75	49.82	1015.01	78.33	455.28
23.7	66.56	1002.07	85.19	436.94
16.22	37.87	1022.36	83.13	461.06
24.75	69.45	1013.97	53.49	438.28
10.48	39.58	1011.81	88.86	472.61
29.53	70.79	1003.7	60.89	426.85
12.59	39.72	1017.76	61.14	470.18
23.5	54.42	1012.31	68.29	455.38
29.01	66.56	1006.44	57.62	428.32
9.75	42.49	1010.57	83.63	480.35
19.55	56.53	1020.2	78.1	455.56
21.05	58.33	1013.14	66.34	447.66
24.72	68.67	1006.74	79.02	443.06
21.19	58.86	1014.19	68.96	452.43
10.77	41.54	1019.94	71.13	477.81
28.68	73.77	1004.72	87.01	431.66
29.87	73.91	1004.53	74.3	431.8
22.99	68.67	1006.65	77.62	446.67
24.66	60.29	1018	59.56	445.26
32.63	69.89	1013.85	41.66	425.72
31.38	72.29	1008.73	73.27	430.58
23.87	60.27	1018.94	77.16	439.86
25.6	59.15	1013.31	67.02	441.11
27.62	71.14	1011.6	52.8	434.72
30.1	67.45	1014.23	39.04	434.01
12.19	41.17	1019.43	65.47	475.64
13.11	41.58	1020.43	74.32	460.44
28.29	68.67	1005.46	69.22	436.4
13.45	40.73	1018.7	93.88	461.03
10.98	41.54	1019.94	69.83	479.08
26.48	69.14	1009.31	84.11	435.76
13.07	45.51	1015.22	78.65	460.14
25.56	75.6	1017.37	69.31	442.2
22.68	50.78	1008.83	70.3	447.69
28.86	73.67	1006.65	68.23	431.15
22.7	63.56	1014.32	71.76	445
27.89	73.21	1001.32	85.88	431.59
13.78	44.47	1027.94	71.09	467.22
28.14	51.43	1012.16	52.67	445.33
11.8	45.09	1013.21	89.68	470.57
10.71	39.61	1018.72	73.66	473.77
24.54	60.29	1017.42	58.94	447.67
11.54	40.05	1014.78	87.05	474.29
29.47	71.32	1008.07	67	437.14
29.24	69.05	1003.12	43.18	432.56
14.51	41.79	1009.72	80.62	459.14
22.91	60.07	1016.03	59.72	446.19
27.02	71.77	1006.38	72.1	428.1
13.49	44.47	1030.18	69.15	468.46
30.24	66.75	1017.95	55.66	435.02
23.19	48.6	1002.38	61.19	445.52
17.73	40.55	1003.36	74.62	462.69
18.62	61.27	1019.26	73.35	455.75
12.85	40	1015.89	68.85	463.74
32.33	69.68	1011.95	39.89	439.79
25.09	58.95	1016.99	53.16	443.26
29.45	69.13	1009.3	52.97	432.04
16.91	43.96	1013.32	79.87	465.86
14.09	45.87	1009.05	84.09	465.6
10.73	25.36	1009.35	100.15	469.43
23.2	49.3	1003.4	79.77	440.75
8.21	38.91	1015.82	88.99	481.32
9.3	40.56	1022.64	76.14	479.87
16.97	39.16	1005.7	69.13	458.59
23.69	71.97	1009.62	93.03	438.62
25.13	59.44	1012.38	77.92	445.59
9.86	43.56	1015.13	74.89	481.87
11.33	41.5	1013.58	88.7	475.01
26.95	48.41	1008.53	62.94	436.54
15	40.66	1016.28	89.62	456.63
20.76	62.52	1015.63	81.04	451.69
14.29	39.59	1010.93	94.53	463.04
19.74	67.71	1007.68	64.02	446.1
26.68	59.92	1009.94	70.57	438.67
14.24	41.4	1019.7	70.32	466.88
21.98	48.41	1008.42	84.86	444.6
22.75	59.39	1015.4	81.41	440.26
8.34	40.96	1023.28	89.45	483.92
11.8	41.2	1017.18	82.71	475.19
8.81	44.68	1023.06	93.93	479.24
30.05	73.68	1014.95	70.6	434.92
16.01	65.46	1014	87.68	454.16
21.75	58.79	1012.42	87.58	447.58
13.94	41.26	1021.67	74.4	467.9
29.25	69.13	1010.27	67.35	426.29
22.33	45.87	1007.8	63.61	447.02
16.43	41.79	1005.47	76.89	455.85
11.5	40.22	1010.31	78.08	476.46
23.53	68.94	1007.53	69.17	437.48
21.86	49.21	1014.61	53.31	452.77
6.17	39.33	1012.57	93.32	491.54
30.19	64.79	1017.22	42.47	438.41
11.67	41.93	1019.81	82.58	476.1
15.34	36.99	1007.87	94.59	464.58
11.5	40.78	1023.91	86.31	467.74
25.53	57.17	1010	72.57	442.12
21.27	57.5	1014.53	80.76	453.34
28.37	69.13	1010.44	71.93	425.29
28.39	51.43	1011.74	47.54	449.63
13.78	45.78	1025.27	95.72	462.88
14.6	42.32	1015.71	77.03	464.67
5.1	35.57	1027.17	80.49	489.96
7	38.08	1020.27	77.67	482.38
26.3	77.95	1009.45	78.72	437.95
30.56	71.98	1004.74	58.77	429.2
21.09	46.63	1013.03	74.8	453.34
28.21	70.02	1010.58	51.34	442.47
15.84	49.69	1015.14	90.41	462.6
10.03	40.96	1024.57	91.1	478.79
20.37	52.05	1012.34	62.57	456.11
21.19	50.16	1005.81	84.27	450.33
33.73	69.88	1007.21	42.93	434.83
29.87	73.68	1015.1	40.96	433.43
19.62	62.96	1020.76	76.53	456.02
9.93	40.67	1018.08	69.74	485.23
9.43	37.14	1013.03	74.99	473.57
14.24	39.58	1011.17	70.45	469.94
12.97	49.83	1008.69	91.49	452.07
7.6	41.04	1021.82	88.97	475.32
8.39	36.24	1013.39	89.13	480.69
25.41	48.06	1013.12	46.52	444.01
18.43	56.03	1020.41	60.55	465.17
10.31	39.82	1012.87	88.71	480.61
11.29	41.5	1013.39	89.15	476.04
22.61	49.3	1003.51	83.02	441.76
29.34	71.98	1005.19	75.19	428.24
18.87	67.71	1004	87.35	444.77
13.21	45.87	1008.58	85.66	463.1
11.3	44.6	1018.19	91.66	470.5
29.23	72.99	1007.04	63.47	431
27.76	69.4	1004.27	72.25	430.68
29.26	67.17	1006.6	70.58	436.42
25.72	49.82	1016.19	60.1	452.33
23.43	63.94	1010.64	89.29	440.16
25.6	63.76	1010.18	67.43	435.75
22.3	44.57	1008.48	67.58	449.74
27.91	72.24	1010.74	70.8	430.73
30.35	77.17	1009.55	63.62	432.75
21.78	47.43	1007.88	66.68	446.79
7.19	41.39	1018.12	90.76	486.35
20.88	59.8	1015.66	75.34	453.18
24.19	50.23	1015.73	59.77	458.31
9.98	41.54	1019.7	80.79	480.26
23.47	51.3	1011.89	74.1	448.65
26.35	49.5	1012.67	41.34	458.41
29.89	64.69	1006.37	58.78	435.39
19.29	50.16	1010.49	97.78	450.21
17.48	43.14	1018.68	74.85	459.59
25.21	75.6	1017.19	69.84	445.84
23.3	48.78	1018.17	75.36	441.08
15.42	37.85	1009.89	85.8	467.33
21.44	63.09	1016.56	90.11	444.19
29.45	68.27	1007.96	61.63	432.96
29.69	47.93	1002.85	44.76	438.09
15.52	36.99	1006.86	89.7	467.9
11.47	43.67	1012.68	72.51	475.72
9.77	34.69	1027.72	74.98	477.51
22.6	69.84	1006.37	79.59	435.13
8.24	39.61	1017.99	78.42	477.9
17.01	44.2	1019.18	61.23	457.26
19.64	44.6	1015.88	47.56	467.53
10.61	41.58	1021.08	93.06	465.15
12.04	40.1	1014.42	89.65	474.28
29.19	65.71	1013.85	50.5	444.49
21.75	45.09	1014.15	44.84	452.84
23.66	77.54	1008.5	85.32	435.38
27.05	75.33	1003.88	82.94	433.57
29.63	69.71	1009.04	67.26	435.27
18.2	39.63	1005.35	79.05	468.49
32.22	70.8	1009.9	62.03	433.07
26.88	73.56	1004.85	94.36	430.63
29.05	65.74	1013.29	60.02	440.74
8.9	39.96	1026.31	95.46	474.49
18.93	48.6	1005.72	84.92	449.74
27.49	63.76	1010.09	62.8	436.73
23.1	70.79	1006.53	90.81	434.58
11.22	43.13	1017.24	80.9	473.93
31.97	79.74	1007.03	55.84	435.99
13.32	43.22	1009.45	75.3	466.83
31.68	68.24	1005.29	37.34	427.22
23.69	63.77	1013.39	79.5	444.07
13.83	41.49	1020.11	87.29	469.57
18.32	66.51	1015.18	81.5	459.89
11.05	40.71	1024.91	76.42	479.59
22.03	64.69	1007.21	75.75	440.92
10.23	41.46	1020.45	84.95	480.87
23.92	66.54	1009.93	62.37	441.9
29.38	69.68	1011.35	49.25	430.2
17.35	42.86	1014.62	74.16	465.16
9.81	44.45	1021.19	90.55	471.32
4.97	40.64	1020.91	94.28	485.43
5.15	40.07	1012.27	63.31	495.35
21.54	58.49	1010.85	78.9	449.12
7.94	42.02	1006.22	90.97	480.53
18.77	50.66	1014.89	87.34	457.07
21.69	69.94	1010.7	80.8	443.67
10.07	44.68	1023.44	90.95	477.52
13.83	39.64	1012.52	69.97	472.95
10.45	39.69	1003.92	89.45	472.54
11.56	40.71	1015.85	76.08	469.17
23.64	70.04	1011.09	83.35	435.21
10.48	40.22	1004.81	92.16	477.78
13.09	39.85	1012.86	58.42	475.89
10.67	40.23	1017.75	85.06	483.9
12.57	39.16	1016.53	88.91	476.2
14.45	43.34	1015.47	83.33	462.16
14.22	37.85	1011.24	88.49	471.05
6.97	41.26	1010.6	96.88	484.71
20.61	63.86	1015.43	73.86	446.34
14.67	42.28	1007.21	65.17	469.02
29.06	72.86	1004.23	69.41	432.12
14.38	40.1	1015.51	81.23	467.28
32.51	69.98	1013.29	54.07	429.66
11.79	45.09	1013.16	89.17	469.49
8.65	40.56	1023.23	78.85	485.87
9.75	40.81	1026	84.44	481.95
9.11	40.02	1031.1	83.02	479.03
23.39	69.13	1010.99	90.66	434.5
14.3	54.3	1015.16	75.29	464.9
17.49	63.94	1020.02	82.6	452.71
31.1	69.51	1010.84	45.4	429.74
19.77	56.65	1020.67	66.33	457.09
28.61	72.29	1011.61	45.33	446.77
13.52	41.48	1014.46	67.12	460.76
13.52	40.83	1008.31	84.14	471.95
17.57	46.21	1014.09	80.81	453.29
28.18	60.07	1016.34	49.13	441.61
14.29	46.18	1017.01	87.29	464.73
18.12	43.69	1016.91	52.95	464.68
31.27	73.91	1003.72	68.92	430.59
26.24	77.95	1014.19	85.21	438.01
7.44	41.04	1021.84	88.56	479.08
29.78	74.78	1009.28	55.09	436.39
23.37	65.46	1016.25	48.64	447.07
10.62	39.58	1011.9	87.85	479.91
5.84	43.02	1013.88	87.42	489.05
14.51	53.82	1016.46	62.75	463.17
11.31	42.02	1001.18	94.86	471.26
11.25	40.67	1011.64	63.54	480.49
9.18	39.42	1025.41	69.46	473.78
19.82	58.16	1016.76	74.66	455.5
24.77	58.41	1013.78	80.57	446.27
9.66	41.06	1021.21	84.7	482.2
21.96	59.8	1016.72	72.6	452.48
18.59	43.14	1011.92	52.63	464.48
24.75	69.89	1015.29	82.01	438.1
24.37	63.47	1012.77	75.22	445.6
29.6	67.79	1010.37	51.05	442.43
25.32	61.25	1011.56	80.1	436.67
16.15	41.85	1016.54	81.58	466.56
15.74	71.14	1019.65	65.94	457.29
5.97	36.25	1029.65	86.74	487.03
15.84	52.72	1026.45	62.57	464.93
14.84	44.63	1019.28	57.37	466
12.25	48.79	1017.44	88.91	469.52
27.38	70.04	1011.18	72.26	428.88
8.76	41.48	1018.49	74.98	474.3
15.54	39.31	1009.69	71.19	461.06
18.71	39.39	1014.09	62.82	465.57
13.06	41.78	1012.3	55.31	467.67
12.72	40.71	1016.02	71.57	466.99
19.83	39.39	1013.73	59.16	463.72
27.23	49.16	1004.03	40.8	443.78
24.27	68.28	1005.43	67.63	445.23
11.8	40.66	1017.13	97.2	464.43
6.76	36.25	1028.31	91.16	484.36
25.99	63.07	1012.5	64.81	442.16
16.3	39.63	1004.64	85.61	464.11
16.5	49.39	1018.35	93.42	462.48
10.59	42.49	1009.59	77.36	477.49
26.05	65.59	1012.78	67.03	437.04
19.5	40.79	1003.8	89.45	457.09
22.21	45.01	1012.22	54.84	450.6
17.86	45	1023.25	53.48	465.78
29.96	70.04	1010.15	54.47	427.1
19.08	44.63	1020.14	43.36	459.81
23.59	47.43	1006.64	48.92	447.36
3.38	39.64	1011	81.22	488.92
26.39	66.49	1012.96	60.35	433.36
8.99	39.04	1021.99	75.98	483.35
10.91	41.04	1026.57	74.24	469.53
13.08	39.82	1012.27	85.21	476.96
23.95	58.46	1017.5	68.46	440.75
15.64	43.71	1024.51	78.31	462.55
18.78	54.2	1012.05	89.25	448.04
20.65	50.59	1016.22	68.57	455.24
4.96	40.07	1011.8	67.38	494.75
23.51	57.32	1012.55	53.6	444.58
5.99	35.79	1011.56	91.69	484.82
23.65	66.05	1019.6	78.21	442.9
5.17	39.33	1009.68	94.19	485.46
26.38	49.5	1012.82	37.19	457.81
6.02	43.65	1013.85	83.53	481.92
23.2	61.02	1009.63	79.45	443.23
8.57	39.69	1000.91	99.9	474.29
30.72	71.58	1009.98	50.39	430.46
21.52	50.66	1013.56	74.33	455.71
22.93	62.26	1011.25	83.66	438.34
5.71	41.31	1003.24	89.48	485.83
18.62	44.06	1017.76	64.59	452.82
27.88	68.94	1007.68	75.68	435.04
22.32	59.8	1016.82	64.18	451.21
14.55	42.74	1028.41	70.09	465.81
17.83	44.92	1025.04	70.58	458.42
9.68	39.96	1026.09	99.28	470.22
19.41	49.39	1020.84	81.89	449.24
13.22	44.92	1023.84	87.99	471.43
12.24	44.92	1023.74	88.21	473.26
19.21	58.49	1011.7	91.29	452.82
29.74	70.32	1008.1	52.72	432.69
23.28	60.84	1017.91	67.5	444.13
8.02	41.92	1029.8	92.05	467.21
22.47	48.6	1002.33	63.23	445.98
27.51	73.77	1002.42	90.88	436.91
17.51	44.9	1009.05	74.91	455.01
23.22	66.56	1002.47	85.39	437.11
11.73	40.64	1020.68	96.98	477.06
21.19	67.71	1006.65	56.28	441.71
5.48	40.07	1019.63	65.62	495.76
24.26	66.44	1011.33	55.32	445.63
12.32	41.62	1012.88	88.88	464.72
31.26	68.94	1005.94	39.49	438.03
32.09	72.86	1003.47	54.59	434.78
24.98	60.32	1015.63	57.19	444.67
27.48	61.41	1012.2	45.06	452.24
21.04	45.09	1014.19	40.62	450.92
27.75	70.4	1006.65	90.21	436.53
22.79	71.77	1005.75	90.91	435.53
24.22	68.51	1013.23	74.96	440.01
27.06	64.45	1008.72	54.21	443.1
29.25	71.94	1007.18	63.62	427.49
26.86	68.08	1012.99	50.04	436.25
29.64	67.79	1009.99	51.23	440.74
19.92	63.31	1015.02	82.71	443.54
18.5	51.43	1010.82	92.04	459.42
23.71	60.23	1009.76	90.67	439.66
14.39	44.84	1023.55	91.14	464.15
19.3	56.65	1020.55	70.43	459.1
24.65	52.36	1014.76	66.63	455.68
13.5	45.51	1015.33	86.95	469.08
9.82	41.26	1007.71	96.69	478.02
18.4	44.06	1017.36	70.88	456.8
28.12	44.89	1009.18	47.14	441.13
17.15	43.69	1017.05	63.36	463.88
30.69	73.67	1006.14	60.58	430.45
28.82	65.71	1014.24	54.3	449.18
21.3	48.92	1010.92	65.09	447.89
30.58	70.04	1010.4	48.16	431.59
21.17	52.3	1009.36	81.51	447.5
9.87	41.82	1033.04	68.57	475.58
22.18	59.8	1016.77	73.16	453.24
24.39	63.21	1012.59	80.88	446.4
10.73	44.92	1025.1	85.4	476.81
9.38	40.46	1019.29	75.77	474.1
20.27	57.76	1016.66	75.76	450.71
24.82	66.48	1006.4	70.21	433.62
16.55	41.66	1011.45	55.53	465.14
20.73	59.87	1019.08	80.48	445.18
9.51	39.22	1015.3	72.41	474.12
8.63	43.79	1016.08	83.25	483.91
6.48	40.27	1010.55	82.12	486.68
14.95	43.52	1022.43	94.75	464.98
5.76	45.87	1010.83	95.79	481.4
10.94	39.04	1021.81	86.02	479.2
15.87	41.16	1005.85	78.29	463.86
12.42	38.25	1012.76	82.23	472.3
29.12	58.84	1001.31	52.86	446.51
29.12	51.43	1005.93	60.66	437.71
19.08	41.1	1001.96	62.77	458.94
31.06	67.17	1007.62	65.54	437.91
5.72	39.33	1009.96	95.4	490.76
26.52	65.06	1013.4	51.78	439.66
13.84	44.9	1007.58	63.62	463.27
13.03	39.52	1016.68	83.09	473.99
25.94	66.49	1012.83	61.81	433.38
16.64	53.82	1015.13	68.24	459.01
14.13	40.75	1016.05	72.41	471.44
13.65	39.28	1012.97	79.64	471.91
14.5	44.47	1028.2	66.95	465.15
19.8	51.19	1008.25	91.98	446.66
25.2	63.76	1009.78	64.96	438.15
20.66	51.19	1008.81	88.93	447.14
12.07	43.71	1025.53	85.62	472.32
25.64	70.72	1010.16	84	441.68
23.33	72.99	1009.33	89.41	440.04
29.41	64.05	1009.82	67.4	444.82
16.6	53.16	1014.5	76.75	457.26
27.53	72.58	1009.13	89.06	428.83
20.62	43.43	1009.93	64.02	449.07
26.02	71.94	1009.38	64.12	435.21
12.75	44.2	1017.59	81.22	471.03
12.87	48.04	1012.47	100.13	465.56
25.77	62.96	1019.86	58.07	442.83
14.84	41.48	1017.26	63.42	460.3
7.41	40.71	1023.07	83.32	474.25
8.87	41.82	1033.3	74.28	477.97
9.69	40.46	1019.1	71.91	472.16
16.17	46.97	1014.22	85.8	456.08
26.24	49.82	1014.9	55.58	452.41
13.78	43.22	1011.31	69.7	463.71
26.3	67.07	1006.26	63.79	433.72
17.37	57.76	1016	86.59	456.4
23.6	48.98	1015.41	48.28	448.43
8.3	36.08	1020.63	80.42	481.6
18.86	42.18	1001.16	98.58	457.07
22.12	49.39	1019.8	72.83	451
28.41	75.6	1018.48	56.07	440.28
29.42	71.32	1002.26	67.13	437.47
18.61	67.71	1004.07	84.49	443.57
27.57	69.84	1004.91	68.37	426.6
12.83	41.5	1013.12	86.07	470.87
9.64	39.85	1012.9	83.82	478.37
19.13	58.66	1013.32	74.86	453.92
15.92	40.56	1020.79	53.52	470.22
24.64	72.24	1011.37	80.61	434.54
27.62	63.9	1013.11	43.56	442.89
8.9	36.24	1013.29	89.35	479.03
9.55	43.99	1020.5	97.28	476.06
10.57	36.71	1022.62	80.49	473.88
19.8	57.25	1010.84	88.9	451.75
25.63	56.85	1012.68	49.7	439.2
24.7	58.46	1015.58	68.64	439.7
15.26	46.18	1013.68	98.58	463.6
20.06	52.84	1004.21	82.12	447.47
19.84	56.89	1013.23	78.32	447.92
11.49	44.63	1020.44	86.04	471.08
23.74	72.43	1007.99	91.36	437.55
22.62	51.3	1012.36	81.02	448.27
29.53	72.39	998.47	76.05	431.69
21.32	48.14	1016.57	71.81	449.09
20.3	58.46	1015.93	82.13	448.79
16.97	44.92	1025.21	74.27	460.21
12.07	41.17	1013.54	71.32	479.28
7.46	41.82	1032.67	74.59	483.11
19.2	54.2	1011.46	84.44	450.75
28.64	66.54	1010.43	43.39	437.97
13.56	41.48	1008.53	87.2	459.76
17.4	44.9	1020.5	77.11	457.75
14.08	40.1	1015.48	82.81	469.33
27.11	69.75	1009.74	85.67	433.28
20.92	70.02	1010.23	95.58	444.64
16.18	44.9	1021.3	74.46	463.1
15.57	44.68	1022.01	90.02	460.91
10.37	39.04	1023.95	81.93	479.35
19.6	59.21	1017.65	86.29	449.23
9.22	40.92	1021.83	85.43	474.51
27.76	72.99	1007.81	71.66	435.02
28.68	70.72	1009.43	71.33	435.45
20.95	48.14	1013.3	67.72	452.38
9.06	39.3	1019.73	84.23	480.41
9.21	39.72	1019.54	74.44	478.96
13.65	42.74	1026.58	71.48	468.87
31.79	76.2	1007.89	56.3	434.01
14.32	44.6	1013.85	68.13	466.36
26.28	75.23	1011.44	68.35	435.28
7.69	43.02	1014.51	85.23	486.46
14.44	40.1	1015.51	79.78	468.19
9.19	41.01	1022.14	98.98	468.37
13.35	41.39	1019.17	72.87	474.19
23.04	74.22	1009.52	90.93	440.32
4.83	38.44	1015.35	72.94	485.32
17.29	42.86	1014.38	72.3	464.27
8.73	36.18	1013.66	77.74	479.25
26.21	70.32	1007	78.29	430.4
23.72	58.62	1016.65	69.1	447.49
29.27	64.69	1006.85	55.79	438.23
10.4	40.43	1025.46	75.09	492.09
12.19	40.75	1015.13	88.98	475.36
20.4	54.9	1016.68	64.26	452.56
34.3	74.67	1015.98	25.89	427.84
27.56	68.08	1010.8	59.18	433.95
30.9	70.8	1008.48	67.48	435.27
14.85	58.59	1014.04	89.85	454.62
16.42	40.56	1020.36	50.62	472.17
16.45	63.31	1015.96	83.97	452.42
10.14	42.02	1003.19	96.51	472.17
9.53	41.44	1018.01	80.09	481.83
17.01	49.15	1021.83	84.02	458.78
23.94	62.08	1022.47	61.97	447.5
15.95	49.25	1019.04	88.51	463.4
11.15	41.26	1022.67	81.83	473.57
25.56	70.32	1009.07	90.63	433.72
27.16	66.44	1011.2	73.37	431.85
26.71	77.95	1012.13	77.5	433.47
29.56	74.22	1007.45	57.46	432.84
31.19	70.94	1007.29	51.91	436.6
6.86	41.17	1020.12	79.14	490.23
12.36	41.74	1020.58	69.24	477.16
32.82	68.31	1010.44	41.85	441.06
25.3	70.98	1007.22	95.1	440.86
8.71	41.82	1033.08	74.53	477.94
13.34	40.8	1026.56	64.85	474.47
14.2	43.02	1012.18	57.07	470.67
23.74	65.34	1013.7	62.9	447.31
16.9	44.88	1018.14	72.21	466.8
28.54	71.94	1007.4	65.99	430.91
30.15	69.88	1007.2	73.67	434.75
14.33	42.86	1010.82	88.59	469.52
25.57	59.43	1008.88	61.19	438.9
30.55	70.04	1010.51	49.37	429.56
28.04	74.33	1013.53	48.65	432.92
26.39	49.16	1005.68	56.18	442.87
15.3	41.76	1022.57	71.56	466.59
6.03	41.14	1028.04	87.46	479.61
13.49	44.63	1019.12	70.02	471.08
27.67	59.14	1016.51	61.2	433.37
24.19	65.48	1018.8	60.54	443.92
24.44	59.14	1016.74	71.82	443.5
29.86	64.79	1017.37	44.8	439.89
30.2	69.59	1008.9	67.32	434.66
7.99	41.38	1021.95	78.77	487.57
9.93	41.62	1013.76	96.02	464.64
11.03	42.32	1017.26	90.56	470.92
22.34	63.73	1014.37	83.19	444.39
25.33	48.6	1002.54	68.45	442.48
18.87	52.08	1005.25	99.19	449.61
25.97	69.34	1009.43	88.11	435.02
16.58	43.99	1021.81	79.29	458.67
14.35	46.18	1016.63	87.76	461.74
25.06	62.39	1008.09	82.56	438.31
13.85	48.92	1011.68	79.24	462.38
16.09	44.2	1019.39	67.24	460.56
26.34	59.21	1013.37	58.98	439.22
23.01	58.79	1009.71	84.22	444.64
26.39	71.25	999.8	89.12	430.34
31.32	71.29	1008.37	50.07	430.46
16.64	45.87	1009.02	98.86	456.79
13.42	41.23	994.17	95.79	468.82
20.06	44.9	1008.79	70.06	448.51
14.8	44.71	1014.67	41.71	470.77
12.59	41.14	1025.79	86.55	465.74
26.7	66.56	1005.31	71.97	430.21
19.78	50.32	1008.62	96.4	449.23
15.17	49.15	1021.91	91.73	461.89
21.71	61.45	1010.97	91.62	445.72
19.09	39.39	1013.36	59.14	466.13
19.76	51.19	1008.38	92.56	448.71
14.68	41.23	998.43	83.71	469.25
21.3	66.86	1013.04	55.43	450.56
16.73	39.64	1008.94	74.91	464.46
12.26	41.5	1014.87	89.41	471.13
14.77	48.06	1010.92	69.81	461.52
18.26	59.15	1012.04	86.01	451.09
27.1	79.74	1005.43	86.05	431.51
14.72	40.83	1009.65	80.98	469.8
26.3	51.43	1012.05	63.62	442.28
16.48	48.92	1011.84	64.16	458.67
17.99	43.79	1016.13	75.63	462.4
20.34	59.8	1015.18	80.21	453.54
25.53	62.96	1019.81	59.7	444.38
31.59	58.9	1003.39	47.6	440.52
30.8	69.14	1007.68	63.78	433.62
10.75	45	1023.68	89.37	481.96
19.3	44.9	1008.89	70.55	452.75
4.71	39.42	1026.4	84.42	481.28
23.1	66.05	1020.28	80.62	439.03
32.63	73.88	1005.64	52.56	435.75
26.63	74.16	1009.72	83.26	436.03
24.35	58.49	1011.03	70.64	445.6
15.11	56.03	1020.27	89.95	462.65
29.1	50.05	1005.87	51.53	438.66
21.24	50.32	1008.54	84.83	447.32
6.16	39.48	1004.85	59.68	484.55
7.36	41.01	1024.9	97.88	476.8
10.44	39.04	1023.99	85.03	480.34
26.76	48.41	1010.53	47.38	440.63
16.79	44.6	1014.27	48.08	459.48
10.76	40.43	1025.98	79.65	490.78
6.07	38.91	1019.25	83.39	483.56
27.33	73.18	1012.26	82.18	429.38
27.15	59.21	1013.49	51.71	440.27
22.35	51.43	1011.34	77.33	445.34
21.82	65.27	1013.86	72.81	447.43
21.11	69.94	1004.37	84.26	439.91
19.95	50.59	1016.11	73.23	459.27
7.45	39.61	1017.88	79.73	478.89
15.36	41.66	1012.41	62.32	466.7
15.65	43.5	1021.39	78.58	463.5
25.31	74.33	1015.04	79.88	436.21
25.88	63.47	1011.95	65.87	443.94
24.6	63.94	1012.87	80.28	439.63
22.58	41.54	1013.21	71.33	460.95
19.69	59.14	1015.99	70.33	448.69
25.85	75.08	1006.24	57.73	444.63
10.06	37.83	1005.49	99.46	473.51
18.59	39.54	1008.56	68.61	462.56
18.27	50.16	1011.07	95.91	451.76
8.85	40.43	1025.68	80.42	491.81
30.04	68.08	1011.04	51.01	429.52
26.06	49.02	1007.59	74.08	437.9
14.8	38.73	1003.18	80.73	467.54
23.93	64.45	1015.35	54.71	449.97
23.72	66.48	1003.61	73.75	436.62
11.44	40.55	1023.37	88.43	477.68
20.28	63.86	1016.04	74.66	447.26
27.9	63.13	1011.8	70.04	439.76
24.74	59.39	1015.23	74.64	437.49
14.8	58.2	1018.29	85.11	455.14
8.22	41.03	1021.76	82.97	485.5
27.56	66.93	1016.81	55.59	444.1
32.07	70.94	1006.91	49.9	432.33
9.53	44.03	1008.87	89.99	471.23
13.61	42.34	1017.93	91.61	463.89
22.2	51.19	1009.2	82.95	445.54
21.36	59.54	1007.99	92.62	446.09
23.25	63.86	1017.82	59.64	445.12
23.5	59.21	1018.29	63	443.31
8.46	39.66	1015.14	85.38	484.16
8.19	40.69	1019.86	85.23	477.76
30.67	71.29	1008.36	52.08	430.28
32.48	62.04	1010.39	38.05	446.48
8.99	36.66	1028.11	71.98	481.03
13.77	47.83	1007.41	90.66	466.07
19.05	67.32	1013.2	83.14	447.47
21.19	55.5	1019.83	65.22	455.93
10.12	40	1021.15	91.67	479.62
24.93	47.01	1014.28	66.04	455.06
8.47	40.46	1019.87	78.19	475.06
24.52	56.85	1012.59	54.47	438.89
28.55	69.84	1003.38	67.26	432.7
20.58	50.9	1011.89	72.56	452.6
18.31	46.21	1010.46	82.15	451.75
27.18	71.06	1008.16	86.32	430.66
4.43	38.91	1019.04	88.17	491.9
26.02	74.78	1010.04	72.78	439.82
15.75	39	1015.91	69.58	460.73
22.99	60.95	1015.14	69.86	449.7
25.52	59.15	1013.88	65.37	439.42
27.04	65.06	1013.33	52.37	439.84
6.42	35.57	1025.58	79.63	485.86
17.04	40.12	1011.81	83.14	458.1
10.79	39.82	1012.89	88.25	479.92
20.41	56.03	1019.94	55.85	458.29
7.36	40.07	1017.29	52.55	489.45
28.08	73.42	1012.17	62.74	434
24.74	69.13	1010.69	90.08	431.24
28.32	47.93	1003.26	54.5	439.5
16.71	40.56	1019.48	49.88	467.46
30.7	71.58	1010	48.96	429.27
18.42	58.95	1016.95	86.77	452.1
10.62	42.02	999.83	96.66	472.41
22.18	69.05	1002.75	70.84	442.14
22.38	49.3	1003.56	83.83	441
13.94	41.58	1020.76	68.22	463.07
21.24	60.84	1017.99	82.22	445.71
6.76	39.81	1017.11	87.9	483.16
26.73	68.84	1010.75	66.83	440.45
7.24	38.06	1020.6	85.36	481.83
10.84	40.62	1015.53	60.9	467.6
19.32	52.84	1004.29	83.51	450.88
29	69.13	1001.22	52.96	425.5
23.38	54.42	1013.95	73.02	451.87
31.17	69.51	1010.51	43.11	428.94
26.17	48.6	1002.59	61.41	439.86
30.9	73.42	1011.21	65.32	433.44
24.92	73.68	1015.12	93.68	438.23
32.77	71.32	1007.68	42.39	436.95
14.37	40.56	1021.67	68.18	470.19
8.36	40.22	1011.6	89.18	484.66
31.45	68.27	1007.56	64.79	430.81
31.6	73.17	1010.05	43.48	433.37
17.9	48.98	1014.17	80.4	453.02
20.35	50.9	1012.6	72.43	453.5
16.21	41.23	995.88	80	463.09
19.36	44.6	1016.25	45.65	464.56
21.04	65.46	1017.22	63.02	452.12
14.05	40.69	1015.66	74.39	470.9
23.48	64.15	1021.08	57.77	450.89
21.91	63.76	1009.85	76.8	445.04
24.42	63.07	1011.49	67.39	444.72
14.26	40.92	1022.07	73.96	460.38
21.38	58.33	1013.05	72.75	446.8
15.71	44.06	1018.34	71.69	465.05
5.78	40.62	1016.55	84.98	484.13
6.77	39.81	1017.01	87.68	488.27
23.84	49.21	1013.85	50.36	447.09
21.17	58.16	1017.16	68.11	452.02
19.94	58.96	1014.16	66.27	455.55
8.73	41.92	1029.41	89.72	480.99
16.39	41.67	1012.96	61.07	467.68
15.28	40	1016.65	65	458.76
22.05	59.92	1009.06	93.74	437.9
18.63	48.92	1011.37	71.72	450.29
15	41.17	1015.57	64.82	468.72
20.46	59.21	1018.42	85.89	445.22
11.97	45.51	1016.84	81.47	472.82
26.59	59.92	1009.97	70.09	438.22
13.76	45.08	1023.77	80.48	469.74
21.41	59.43	1010.27	74.54	442.85
12.45	37.92	1008.03	61.87	470.59
10.62	39.64	1010.65	62.15	477.07
12.33	37.73	1022.46	59.3	470.11
15.63	44.9	1009.38	82.8	457.44
19.11	50.16	1010.88	100.09	450.38
21.83	41.1	1001.91	41.79	453.38
22.02	64.45	1012.57	47.87	454.9
26.54	71.98	1005.8	91.16	431.78
6.9	39.81	1016.74	88.24	481.88
13.05	34.03	1018.31	64.99	472.69
19.61	45.01	1014.84	64.42	461.97
26.26	63.73	1010.45	70.61	442.18
30.56	71.25	1000.3	70.55	431.92
21.81	63.77	1014.28	83.66	444.52
26.65	58.41	1013.53	65.83	442.66
25.18	57.5	1015.07	60.76	449.01
17.8	46.48	1007.27	81.31	452.66
33.27	66.44	1010.63	43.47	430.11
29.94	65.74	1012.4	46.94	440.54
8.51	34.69	1026.96	75.34	481.83
9.45	36.71	1024.24	83.28	476.02
24.27	60.23	1011.84	77.8	438.99
11.28	42.44	1014.62	99.78	473.36
7.93	41.01	1023.64	97.23	476.37
14.3	42.99	1007.32	73.72	467.9
24.31	63.86	1019.47	58.54	442.69
29.3	70.04	1010.95	61.23	426.25
20.43	63.09	1016.46	91.78	445.58
10.94	39.69	1004.5	86.29	459.69
23.04	57.32	1011.23	64.27	442.01
25.37	44.89	1009.27	63.06	442.38
21.1	49.16	1006.76	86.08	442.78
20.4	57.85	1011.14	92.47	450.07
20.51	48.6	1005.29	80.7	448
12.15	38.78	1013.34	95.05	474.15
15.27	41.16	1009	84.12	467.01
23.78	60.27	1018.02	78.06	441.56
22.01	60.84	1017.55	83.82	441.9
24.72	77.54	1008.39	81.03	438.52
28.84	73.03	1013.99	76.05	435.75
26.53	54.2	1012.9	66.73	439.96
19.82	41.67	1012.92	51.92	456.87
16.69	40.56	1019.92	51.43	469.9
20.36	56.53	1020.25	72.96	455.34
18.6	68.28	1003.27	84.21	446.98
12.54	40.1	1015.73	84.29	475.02
14.54	46.18	1015.29	94.48	463.03
30.97	67.9	1005.98	55.6	428.26
26.54	71.14	1007.52	72.04	431.31
25.2	59.21	1017.54	55.53	444.16
13.17	38.52	1018.5	83.77	468.82
8.53	40.77	1009.85	90.95	481.03
24.06	58.2	1017.46	48.04	445.91
12.25	41.38	1021.81	59	474.77
14.7	40.8	1025.78	50.96	472.85
15.75	39.39	1014.38	76.29	468.6
29.45	74.16	1010.49	64.87	438.11
30.22	68.3	1014.91	34.9	434.3
26.96	72.58	1009.23	89.62	429.03
18.48	58.59	1015.61	85.14	452.52
17.78	50.66	1015.09	91.9	456.11
6.64	39.04	1018.84	74.94	481.53
21.83	63.13	1013.4	85.82	443.41
13.92	39.58	1012.5	80.28	465.67
12.14	40.27	1007.57	73.22	472.84
15.64	38.28	1014.39	76.93	466.51
16	44.9	1020.5	80.89	461.5
9.75	43.69	1016.81	82.42	481.34
13.56	43.67	1011.34	94.02	467.09
7.94	40.56	1023.25	80.84	488.01
20.46	54.2	1011.4	84	448.1
18.23	62.26	1011.48	91.35	448.64
23.14	63.94	1017.49	53.19	446.57
20.55	46.21	1013.21	73.18	448.66
23.58	49.3	1003.8	74.62	440.44
14.51	42.77	1017.47	81.95	463.37
10.05	40.71	1015.51	84.21	471.68
26.91	61.5	1009.47	55.26	436.84
15.66	41.35	1001.68	86.26	463.57
30.07	69.82	1010.39	57.53	437.38
24.28	68.31	1009.94	77.08	440.07
12.57	39.3	1019.57	72.44	473.67
11.01	42.02	995.24	98.62	473.96
23.3	72.99	1008.54	92.11	437.62
28.76	60.23	1010.03	58.24	437.42
21.4	68.28	1008.2	60.34	450.22
30.33	68.67	1006	54.99	435.53
18.89	67.71	1003.92	86.12	443.54
18.83	47.83	1005.58	77.07	454.23
12.32	43.69	1016.26	83.18	471.6
25.15	68.51	1013.25	72.31	440.96
17.06	52.9	1019.76	80.9	460.82
23.68	49.02	1007.53	86.05	440.68
11.95	39.82	1013.4	92.51	474.56
25.39	58.79	1015.85	62.59	441.51
11.52	40.8	1024.31	73.49	479.56
19.69	56.65	1020.86	73.41	455.32
26.1	74.16	1009.42	85.4	437.18
27.44	74.9	1003.85	76.65	436.42
27.35	66.05	1017.62	55.26	439.6
25.7	69.45	1013.86	56.91	437.04
24.54	58.66	1011.63	57.62	448.11
14.87	41.23	997.39	82.06	465.01
14.05	40.35	1011.52	66.21	475.54
25.69	73.18	1012.64	86.35	432.82
31.01	67.69	1005.06	46.16	426.64
9.46	42.28	1008.67	78.16	481.95
7.71	40.77	1021.93	87.04	482.19
15.69	37.64	1016	83.88	462.18
26.45	64.27	1013.23	60.92	444.9
22.86	60.08	1017.2	67.11	452.34
21.61	49.39	1019.41	78.2	449.26
25.66	77.54	1008.22	78.42	432.82
22.48	71.29	1008.15	75.41	444.71
21.58	63.87	1015.27	63.15	451.88
25.94	77.24	1007.97	84.82	432.88
16.45	44.68	1018.6	85.14	462.66
27.88	63.87	1017.79	40	443.24
26.62	65.12	1016	43.24	441.22
27.94	49.16	1004.22	35.46	436.75
5.02	45.87	1007.8	99.22	481.03
31.87	71.22	1006.16	45.66	437
24.49	68.61	1010.56	64.03	447.57
30.42	67.69	1006.23	54.19	430.9
20.85	59.21	1012.9	75.97	444.44
13.18	40.03	1017.75	82.29	470.88
5.37	38.68	1017.76	76.48	487.07
31.81	69.88	1007.94	55.91	432.6
20.55	48.98	1016.1	63.89	452.52
22.49	69.84	1006.78	73.76	437.57
12.57	39.18	1023.09	77.28	471.87
27.35	69.48	1008.51	65.81	432.31
17.82	49.15	1020.73	70.25	457.35
23.25	56.9	1006.82	76.37	442.76
9.37	40.11	1024.94	75.03	471.13
24.43	58.2	1017.18	46.84	444.89
20.04	49.39	1020.62	78.84	449.63
10.06	43.22	1014.1	85.7	473
21.44	50.78	1008.87	87.56	443.3
29.04	62.26	1010.63	56.6	433.97
8.83	41.26	1023.04	86.08	478.87
24.19	46.21	1010.79	62.04	440.87
11.97	41.04	1026.42	70.75	468.81
19.43	52.9	1017.16	67.41	458.46
15.59	45.09	1013.41	91.97	457.54
13.23	42.34	1018.02	97.49	462.21
16.34	41.16	1006.36	75.52	462.56
28.1	61.02	1011.28	59.05	437.5
26.08	70.32	1012.32	89	434.24
24.44	52.84	1006.39	49.05	440.2
18.37	58.96	1015.5	67.79	460.25
22.93	51.19	1009.3	82.8	443.57
29.67	73.67	1006.48	64.98	429.28
12.15	43.71	1025.78	93.69	472.59
15.67	45.17	1018.73	94.74	462.09
14.7	48.6	1006.91	85.65	460.63
27.33	52.84	1005.88	56.16	438.97
12.55	38.91	1012.58	75.44	474.35
31.42	69.13	1009.34	57.16	425.98
15.44	39.54	1007.49	82.14	469.28
24.19	47.45	1008.26	64.25	446.3
6.05	41.14	1027.69	86.93	481.02
13.94	42.86	1012.35	88.78	471.64
5.79	45.87	1010.23	95.41	480.97
27.01	69.75	1009.78	81.29	442.57
9.59	38.56	1017.01	60.1	481.3
27.46	69.98	1013.28	63.73	435.36
22.63	70.47	1008	82.27	441.92
28.11	77.95	1009.38	72.81	432.98
18.87	44.06	1013.42	68.78	451.4
15.5	49.25	1021.41	77.92	453.99
3.73	39.42	1024.4	82.42	488.58
26.41	68.24	1010.6	77.79	428.52
17.83	66.86	1011.65	77.31	456.56
13.44	37.85	1009.78	99.13	469.89
14.62	46.18	1014.75	96.81	462.26
19.7	43.79	1015.93	47.39	464.41
6.06	41.17	1019.67	84.7	489.62
15.89	38.73	1001.45	74.37	465.76
31.63	69.59	1008.66	61.81	436.89
18.99	44.58	1018.29	54.71	468.35
13.96	40.92	1022.65	73.08	460.95
20.21	54.9	1016.82	66.56	454.23
15.14	49.64	1023.78	75	463.58
18.97	44.85	1014.86	46.31	466.17
21.36	52.3	1007.95	79.38	448.13
29.48	64.69	1006.44	64.46	435.09
21.1	62.66	1011.19	83.49	448.8
26.51	70.32	1010.3	57.4	431.82
30.93	61.5	1009.81	41.46	437.35
11.64	41.44	1016.4	73.18	478.99
7.26	36.08	1021.47	83.15	483.58
16.36	44.88	1018.34	76	468.53
17.43	63.09	1019.87	92.77	449.36
10.37	37.5	1013.19	79.25	473.1
22.8	49.16	1006.4	77.05	439.65
21	70.02	1010.22	95.11	447.29
12.68	45	1022.54	77.19	479.69
12.35	44.2	1017.81	82.49	471.65
7.09	43.13	1017.91	92.37	485.04
28.9	68.12	1011.87	46.56	438.53
26.82	69.05	1004.62	40	437.42
11.02	40.71	1020.3	86.64	469.31
14.95	43.72	1010.28	93.62	459.31
16.58	44.68	1021.5	83.38	458.87
31.73	73.42	1010.8	61.81	430.46
8.58	38.38	1021.03	84.37	482.26
28.08	73.17	1011.19	73.1	430.8
31.01	67.83	1007.95	43.57	429.46
26.94	59.87	1011.66	58.34	448.6
10.2	41.62	1016.52	98.09	462.87
9.2	39.99	1011.73	85.95	484.04
27.69	70.32	1012.2	82.27	432.57
25.71	71.14	1010.02	66.39	432.46
18.22	39.63	1005.11	79	465.78
16.81	42.42	1008.95	74.25	462.19
30.63	74.22	1007.47	46.52	430.38
12.11	38.28	1013.56	93.21	469.93
23.75	60.29	1017.36	64.04	449.57
33.96	68.94	1006.93	47.39	427.06
29.35	54.2	1013.07	42.45	439.47
23.07	50.05	1006.9	86.98	442.97
12.91	41.66	1013.37	71.52	469.71
6.25	39.04	1019.65	71.27	484.14
19.8	58.79	1017.04	87.71	449.66
31.38	68.27	1006.79	52.79	426.67
10.62	39.96	1025.37	96.64	470.8
6.89	43.65	1019.87	72.77	484
16.3	38.73	1001.79	73.45	465.7
14.82	44.58	1020.13	74.88	473.17
22.97	63.94	1010.5	88.47	440.81
31.15	66.25	1008.89	61.08	437.55
15.69	41.93	1021.3	52.69	468.43
26.65	66.48	1005.7	65.09	436.65
29.38	73.42	1011.49	54.96	445.42
16.77	49.39	1018.61	95.86	459.38
22.77	70.32	1012.04	82.43	440.67
15.91	44.99	1010.93	62.81	459.73
24.33	68.08	1013.02	64.81	442.93
19.69	56.65	1020.79	66.94	457.17
31.76	66.54	1003.02	49.64	430.18
14.47	42.86	1031.55	66.73	466.64
27.2	72.43	1006.75	80.67	430.32
17.29	44.06	1016.24	77.56	461.38
25.44	63.13	1011.74	77.83	441.91
16.98	43.7	1015.07	53.51	464.01
22.65	68.67	1006.67	77.42	447.01
26.41	60.93	1007.16	66.02	436.71
19.78	63.09	1019.01	78.39	448.34
19.26	65.61	1015.03	85.74	451.85
22.25	59.8	1016.79	69.02	451.64
7.1	35.77	1015.39	92.1	480.36
18.53	39.72	1001.26	64.08	457.26
30.47	77.3	1002.13	63.7	434.68
27.34	71.64	1008.12	72.22	438.76
29.8	69.34	1009.36	64.74	437.65
22.69	65.12	1016.35	72.02	446.91
18.58	49.25	1019.92	60.24	452.94
14.16	44.06	1018.92	76.34	464.91
28.33	78.92	1011.15	70.04	432.67
28.31	70.32	1007.88	47	432.5
21.5	50.59	1017.08	65.28	453.8
29.24	64.33	1011.5	64.14	440.29
25.15	66.49	1012.71	63.46	436
15.48	53.82	1016.1	64.77	462.69
16.07	47.83	1006.99	86.49	458.18
18.02	53.16	1013.41	82.84	458.01
14.99	41.35	1004.56	98.9	466.85
29.62	71.8	1011.05	63.13	438.55
25.04	63.86	1018.92	52.79	441.6
11.45	40.8	1027.74	78.6	476.28
18.96	44.58	1016.66	71.95	461.96
26.54	66.51	1015.39	51.22	440.04
22.3	67.25	1017.33	75.85	453.27
14.7	41.39	1018.84	68.19	469.6
9.14	40.6	1015.34	88.91	483.57
6.14	38.5	1012.4	75.35	489.26
11.24	42.34	1021.3	95.19	469.3
30.55	71.06	1009.33	73.38	432.6
14.9	52.05	1015.11	77.33	464.82
10.25	37.14	1013.14	70.73	474.37
3.26	41.31	996.32	100	489.38
27.54	75.6	1018.26	57.89	440.87
13.65	44.6	1017.99	87.04	466.06
22.08	41.1	1002.19	46.69	455.04
24.93	69.05	1001.02	85.14	429.53
27.58	71.97	1008.51	87.99	430.53
32.14	75.08	1005.35	49.92	439.22
16.98	44.85	1015.48	51.77	464.27
13.25	34.03	1018.94	72.1	470.46
25.9	48.92	1009.82	35.42	443.8
30.27	64.05	1011.93	65.72	438.68
22.37	50.78	1008.84	82.06	449.08
21.93	57.17	1009.81	81.15	448.75
29.65	74.9	1003.22	71.09	433.32
18.32	42.18	1002.27	95.99	458.46
22.76	44.05	1006.95	74.07	450.31
8.95	43.56	1015.04	81.53	485.21
13.12	44.21	1019.57	89.29	469.09
21.18	44.57	1007.27	73.67	449.93
16.71	46.18	1011.61	95.82	459.4
15.01	43.56	1014.65	61.82	465.84
25.96	68.08	1011.34	71.57	432.82
33.4	69.98	1013.29	47.78	432.44
17.4	63.09	1020.84	92.58	453
6.49	35.57	1025.4	79.67	486.8
6.01	35.79	1011.26	90.72	482.79
29.97	69.14	1007.92	66.74	433.82
21.33	63.86	1020.33	72.13	445.02
23.27	64.69	1006.84	70.53	438.08
28.3	59.27	1010.92	61.83	445.19
5.74	45.87	1011.44	95.94	482
21.67	50.32	1008.41	85.99	445.31
20.06	47.03	1013.66	83.23	461.02
8.25	37.49	1009.02	81.09	480.38
22.61	50.32	1008.41	79.4	444.74
26.31	71.29	1009.87	84.16	432.92
25.03	57.5	1014.96	62.23	449.48
11.44	41.39	1019.59	79.95	478.52
25.14	49.02	1007.56	79.02	438.53
30.91	69.75	1010.23	59.36	435.7
31.54	71.06	1008.4	71.77	431.87
12.24	44.9	1020.31	82.22	464.25
6.65	39.33	1011.29	92.85	490.41
8.31	40.46	1020.07	78.18	476.72
22.72	50.05	1007	88.24	444.43
22.78	58.59	1012.84	65.55	445.45
25.63	72.99	1008.2	86.8	436.64
6.01	35.79	1011.05	91.33	482.25
20.21	65.06	1016.46	73.36	451.46
7.47	40.64	1020.47	94.8	478.08
19.73	69.51	1013.14	61.84	450.99
13.57	39.39	1014.01	82.12	471.44
14.8	42.77	1019.14	76.53	462.29
10.41	44.68	1023.53	91.38	474.7
12.33	39.85	1012.53	66.04	479.32
26.65	73.18	1012.27	83.12	437.7
19.09	56.51	1015.58	92.56	449.24
12.81	45.51	1015.46	79.97	469.27
9.99	36.71	1023.57	83.53	475.85
13.02	40.1	1014.43	87.32	474.97
14.15	39.28	1013.5	77.63	471.23
19.46	47.03	1013.9	88.86	460.57
23.19	42.67	1007.83	63.31	446.95
20.25	58.59	1012.99	65.98	452.18
31.9	69.4	1003.4	57.76	436.04
20.76	44.58	1017.09	57.47	462.01
20.51	42.23	1013.25	71.83	461.78
22.56	70.98	1005.66	95.95	440.81
25.64	68.14	1005.48	56.11	437.63
23.63	58.79	1017.2	67.68	442.86
15.3	43.14	1015.11	71.35	466
6.79	39.37	1019.79	72.39	487.3
23.89	48.41	1010.48	62.31	441.83
26.23	63.56	1013.57	65.81	440.8
12.5	45.51	1015.8	82.82	469.69
21.97	68.12	1012.53	75.12	443.39
24.11	66.51	1015.35	56.01	437.21
18.24	49.5	1014.37	79.36	464.13
19.7	52.84	1004.86	89.72	444.64
19.15	57.76	1019.62	74.89	458.66
14.79	39.52	1017.95	71.97	469.47
25.13	68.63	1013.57	43.44	446.36
23.02	59.21	1011.74	83.18	440.5
34.35	77.17	1009.26	59.33	437.65
23.95	66.48	1003.55	73.68	431.87
25.52	63.94	1017.81	41.54	440.32
23.56	42.67	1008.01	66.76	440.69
26.67	59.44	1012.01	58.83	441.29
18.7	66.51	1015.14	79.23	458.73
25.89	63.56	1013.82	64.51	443.82
27.25	50.05	1006.53	60.64	439.63
16.73	58.59	1015.02	89.61	455.3
30.67	77.95	1015.28	61.67	435.96
13.98	54.3	1015.58	74.91	466.52
25.42	69.71	1009.29	82.5	435.59
21.57	66.49	1014.76	68.19	455.18
23.66	67.17	1007.24	87.56	443.43
13.87	42.99	1007.45	81.52	471.12
9.42	41.4	1029.6	87.43	478.12
13.61	39.85	1012.78	58.12	475.62
23.84	59.87	1019.11	59.59	441.94
31.09	59.57	1010.67	60.5	440.08
3.98	35.47	1017.22	86.53	489.64
29.28	74.33	1011.66	72.37	426.53
23.55	58.79	1010.78	78.47	447.01
17.37	48.92	1011.91	58.4	455.53
18.34	44.63	1000.76	89.27	455.22
13.86	40.83	1008.76	82.4	470.37
27.36	58.33	1013.86	56.7	439.14
27.71	54.2	1012.72	47.25	440.74
8.46	40.8	1023.57	81.27	485.06
25.18	47.93	1002.92	60.33	441.29
21.82	63.9	1014.48	92.53	447.29
15.61	40.89	1010.48	80.26	467.3
30.4	71.97	1008.42	76.28	430.23
10.54	42.02	997.5	99.77	472.64
10.59	39.96	1025.87	97.05	468.96
12.52	41.44	1016.08	68.94	477.18
32.92	69.05	1000.74	39.61	426.61
21.14	69.94	1008.87	79.74	440.69
26.33	64.45	1013.12	43.31	450.67
27.19	71.58	1010.85	76.1	436.77
19.64	56.53	1019.6	76.19	447.66
15.52	58.59	1014.12	91.22	457.74
12.95	41.38	1021.97	53.83	474.46
6.43	36.08	1022.73	85.03	486.39
25.21	60.37	1006.01	73.14	436.23
21.24	41.67	1012.6	49.27	459.81
9.63	41.14	1027.99	87.89	469.73
24.32	58.79	1016.8	65.61	442.78
17.47	63.31	1015.28	88.22	450.68
14.54	39.39	1013.87	76.39	470.23
20.74	49.69	1010.91	69.1	454.59
8.75	40.77	1021.99	86.46	478.85
27.67	69.59	1009.13	82.15	437.29
23.21	58.66	1012.24	65.31	450.92
7.49	39.81	1019.03	87.29	483.59
7.82	38.91	1015.58	90.11	479.15
7.77	35.77	1016.53	73.79	479.68
22.84	50.05	1005.59	79.49	442.85
10.48	41.93	1017.17	92.81	480.01
10.2	41.46	1020.23	84.54	481.46
27.24	68.08	1013.23	51.96	445.25
9.37	42.32	1015.15	82.96	477.57
24.12	58.66	1011.55	58.96	450.69
14.54	43.14	1010.26	82.98	465.45
31.23	66.75	1017.48	36.55	433.9
5.41	45.87	1008.47	97.51	479.48
15.61	38.52	1018.4	80.99	439.21
26.9	59.14	1016.18	70.88	436.16
23.95	73.67	1007.32	87.67	437.43
9.2	40.03	1017.05	92.46	480.38
9.51	43.79	1016.02	79.81	481.12
8.51	41.26	1023.17	87.79	477.51
19.66	51.43	1010.17	84.19	459.12
27.33	51.43	1006.18	67.6	439.12
21.43	63.94	1017.28	57.49	449.02
14.97	43.67	1011.13	87.33	465.54
21.97	69.23	1012.25	86.45	443.85
8.34	40.77	1010.84	90.01	480.48
21.86	60.27	1016.06	90.48	446.31
24.59	71.94	1006.89	88.52	430.28
26.26	73.06	1009.35	91.65	435.41
26.76	71.94	1008.81	64.62	432.49
30.98	69.82	1009.17	50.63	438.44
19.22	65.06	1015.05	82.5	446.98
25.72	70.47	1010.44	70.57	434.94
22.37	41.54	1013.74	72.21	459.06
26.05	44.89	1009.83	56.36	443.18
20.8	50.9	1012.07	73.16	457
29.1	77.95	1010.01	71.48	431.28
11.17	40.27	1009.54	74.56	476.18
11.35	40.73	1019.37	96.05	472.32
18.12	63.09	1019.32	89.21	449.65
16.97	42.86	1013.92	74.8	463.62
10.22	38.18	1018.01	70.7	474.07
13.1	40.55	1007.59	95.46	472.37
18.22	45.09	1013.62	75.56	454.74
4.15	39.9	1008.84	96.68	491.22
19.15	59.21	1018.41	88.9	450.26
15.87	39.31	1009.95	66.78	460.59
8.05	40.8	1028.01	89.56	483.43
18.81	61.87	1009.71	70.47	448.49
23.95	51.86	1014.24	68.28	449.81
13.21	41.2	1016.63	74.1	474.26
9.38	43.7	1015.45	90.47	481.52
27.41	59.21	1013.3	50.93	438.39
18.42	63.94	1020.47	74.47	450.55
19.51	44.05	1008.52	78.38	451.7
28.5	76.86	999.49	77.47	430.62
11.97	42.32	1016.95	88.32	467.98
3	39.64	1011	80.14	485.2
12.11	41.17	1019.46	62.59	475.53
12.32	41.26	1022.42	79.74	470.27
8.83	36.3	1027.08	72.69	479.86
20.08	49.69	1008.34	69.88	453.54
32.12	69.98	1013.31	54.3	429.86
18.68	56.65	1020.38	80.26	455.79
28.33	68.27	1008.09	50.37	432.66
25.14	67.32	1013.96	41.78	435.39
31.43	69.89	1014.8	56.22	426.15
29.54	72.29	1011	42	443.79
24.94	74.33	1014.3	75.34	435.21
26.49	67.69	1004.61	78.13	430.62
23.89	64.27	1013.37	75.22	450.82
14.41	40.83	1009.82	80.43	470.13
29.3	68.08	1011.23	56.23	434.11
23.09	69.71	1009.75	91.35	437.7
23.23	71.77	1005.01	88.1	432.8
28.86	67.9	1006.29	57.19	432.97
7.4	41.04	1024.44	90.9	477.69
25.23	61.86	1013	76.18	441.48
26.69	79.74	1008.29	73.79	431.41
23.99	45.87	1007.63	52.62	443.66
31.65	66.25	1008.57	59.05	437.35
8.94	43.13	1014.82	76.66	483.63
15.79	58.86	1015.85	91.91	455.15
11.43	40.22	1010.84	81.04	477.5
21.14	67.71	1006.38	56.78	445.12
25.21	65.34	1013.94	65.04	446.68
10.42	39.35	1015.21	89.75	478.52
4.84	38.5	1011.96	81.62	491.23
21.57	69.23	1011.94	81.73	437.55
20.86	39.72	1001.73	56.38	456.27
11.06	37.92	1008.76	67.32	473.16
15.86	40.66	1016.23	86.74	455.85
22.12	60.77	1018.01	83.87	443.97
30.2	71.8	1011.13	60.66	436.94
7.91	37.8	1020.59	61	483.49
17.1	62.1	1020.39	93.63	453.4
13.06	44.2	1018.95	85.68	469.02
20.73	69.94	1009.9	82.12	445.91
10.69	36.71	1022.08	83.28	472.81
17.28	44.06	1018.15	66.93	462.05
8.13	39.96	1026.07	95.84	477.12
19.4	39.53	1007.96	63.38	457.17
25.21	59.21	1017.37	55.06	445.33
25.67	58.59	1013	62.34	451.03
7.31	42.18	1014.75	86.75	477.38
24.27	57.85	1012.81	63.48	445.1
25.8	65.38	1009.3	52.28	450.5
20.68	42.04	1010.2	63.43	464.14
21.26	50.32	1008.41	87.22	446.22
11.2	35.76	1019.24	64.59	473.33
20	39.53	1007.59	62.09	456.28
10.34	41.46	1017.75	89.73	478.03
7.72	41.14	1025.11	96.75	478.34
26.79	77.95	1009.9	80.22	437.91
21.26	60.84	1018.43	78.83	446.08
12.85	40.92	1023.04	84.04	461.05
28.07	70.32	1007.17	67.02	430.29
17.72	39.99	1007.34	72.3	461.7
26.43	75.33	1004.09	86.48	431.79
27.39	67.07	1006.17	58.2	441.45
30.18	65.74	1012.63	47.74	441.65
25.45	67.83	1009.47	57.97	429.95
11.72	41.54	1020.04	66.84	476.12
8.43	40.6	1015.39	91.81	483.1
16.18	41.66	1010.01	65.62	465.82
13.33	54.3	1016.77	80.32	468.1
26.18	52.36	1013.46	56.65	453.54
8.57	41.17	1020.18	72.47	484.2
21.22	59.15	1014.68	59.71	450.96
26.53	65.18	1012.77	64.37	437.39
12.34	40.1	1015.77	92.26	470.92
19.54	44.57	1007.19	78.93	450.54
9.68	41.44	1015.19	87.34	479.89
18.19	66.54	1012.9	86.05	449.22
31.25	68.94	1005.99	49.61	434.51
26.8	72.58	1008.94	78.24	428.62
16.82	41.66	1010.49	63.14	465.64
29.52	64.79	1017.53	44.83	439.6
26.93	72.99	1007.33	78.85	433.18
9.45	41.4	1027.06	87.35	479
13.98	44.84	1023.6	89.09	462.81
29.15	73.42	1011.43	66.49	432.26
10.28	39.61	1020.43	69.09	478.34
21.24	63.47	1011.86	97.02	442.94
11.41	41.4	1019.01	78.59	449.5
20.15	39.72	1001.85	59.32	456.87
11.39	40.27	1009.04	73.13	474.93
22.07	50.78	1008.6	61.33	449.96
28.28	69.48	1008.56	61.3	428.75
9.96	41.26	1022.9	83.83	475.21
21.69	44.57	1005.84	71.53	447.88
13.93	44.21	1022.26	82.4	469.12
23.63	60.93	1006.41	83.06	439.9
16.39	52.75	1024.42	54.61	459.48
13.93	44.9	1022.15	85.93	470.59
14.5	41.76	1023.94	84.42	464.23
18.84	67.32	1012.63	81.89	449.21
27.19	64.27	1013.06	58.13	444.54
20.95	70.72	1009.96	87.73	445.66
14.49	41.92	1030.3	56.62	463.81
24.77	71.94	1006.77	88.86	432.27
21.14	48.78	1020.39	86.2	450.35
28.4	59.27	1012.03	59.75	441.64
17.69	65.46	1013.72	67.28	448.49
23.39	63.94	1010.54	89.94	441.44
20.98	43.77	1010.67	62.73	449.88
7.24	41.17	1020.35	80.56	486.76
22.17	65.61	1014.71	70.91	449.91
19.23	41.67	1012.53	48.86	465.66
10.82	41.55	1004.55	65.14	475.44
16.7	50.66	1014.86	94.87	457.74
19.83	51.19	1008.13	91.29	449
29.99	74.9	1003.84	64.43	435.87
25.02	60.77	1016.71	69.85	441.21
8.85	40.22	1008.61	90.6	482.3
9.87	40.81	1017.17	84.25	473.2
24.04	72.43	1008.02	87.2	439.39
26.45	69.13	1001.53	89.64	427.5
27.58	57.19	1007.88	52.95	435.7
16.53	53.29	1018.64	87.47	463.32
29.24	60.23	1009.62	59.71	438.24
15.52	40	1017	66.27	454.14
28.47	67.69	1004.79	56.51	430.67
8.27	35.76	1020.11	75.25	480.8
26.75	64.79	1017.79	54.31	438.4
22.64	72.24	1011.07	98.55	434.36
19.59	66.54	1012.73	85.84	447.16
18.56	42.18	1001.46	99.59	456.61
9.35	44.03	1011.02	88.11	476.25
28.5	72.99	1007.02	67.13	433.24
23.42	73.17	1012.07	88.39	438.22
22.66	68.3	1017.73	86.92	431.27
32	71.85	1008.44	53.59	427.95
21.11	65.94	1009.83	71.91	448.77
26.34	69.04	1009.44	72.06	444.13
20.94	44.78	1008.14	35.7	465.57
20.54	59.39	1014.07	84.15	445.41
8.16	39.64	1011.21	85.56	481.78
29.11	74.9	1003.31	74.01	432.43
20.16	57.76	1019.34	72.1	455.13
24.87	68.61	1011.19	55.69	450.54
25.86	59.92	1009.92	73.95	436.06
27.26	73.18	1012.58	74.83	429.92
28.59	69.84	1003.79	67.31	427.53
8.75	40.22	1008.96	90.53	482.8
9.11	40.64	1020.68	86.91	476.62
22.98	69.84	1005.55	84.1	437.49
11.28	43.41	1017.91	81.03	471.42
26.12	75.6	1017.41	72.31	439.68
32.9	68.51	1012.95	50.09	430.23
17.31	44.71	1017.43	35.4	463.05
5.25	42.85	1013.75	89.67	477.78
22.57	62.4	1009.77	86.05	444.69
20.41	50.32	1008.45	93.12	447.06
12.29	40.03	1017.62	89.64	472.65
24.3	69.94	1007.02	62.14	438.92
11.56	41.62	1012.5	91.42	460.6
14.21	39.16	1016.5	85.09	473.87
24.96	68.12	1011.27	70.22	437.62
28.16	70.4	1003.77	83.17	434.01
22.86	47.43	1009.75	61.54	452.53
14.43	45.08	1023.23	83.98	465.07
29.3	67.69	1007.17	55.5	430.72
22.61	42.8	1014.24	69.71	460.26
19.83	59.21	1012.67	96.42	440.03
26.17	59.92	1010.01	73.75	444.96
5.78	45.87	1012.65	88.8	483.27
8.77	40.46	1019.68	77.84	475
24.48	69.13	1002.88	69.43	432.71
15.29	41.1	1005.75	85.53	467.99
9.44	43.99	1020.31	98.06	475.01
26.4	48.41	1008.51	66.95	442.23
21.95	60.95	1015.22	75.09	450.38
22.42	60.08	1017.71	67.46	452.31
24.32	65.48	1017.55	59.02	443.31
30.15	72.51	1009.37	50.64	443.72
6.86	40.02	1031.5	77.94	476.45
14.46	45.87	1008.26	89.44	458.69
4.73	41.31	999.77	93.44	486.6
10.27	38.38	1022.16	70.77	475.58
20.37	54.9	1016.94	65.86	453.94
8.12	43.02	1013.56	85.26	483.55
28.57	69.34	1007.98	65.55	439.46
18.81	49.15	1020.79	67.09	459.81
28.62	63.77	1012.82	55.77	441.97
13.96	40.83	1009.89	84.86	469.86
30.47	72.86	1004.02	66.35	432.51
29.13	66.56	1006.63	52.85	439.31
24.41	56.9	1006.58	77.94	439.51
14.56	45.51	1015.39	69.84	469.79
7.11	39.9	1008.82	87.76	484.21
7.92	39.54	1011.51	84.41	481.44
14.56	41.76	1023.82	85.36	464.3
17.45	42.28	1007.64	69.19	463.83
29.75	70.32	1007.35	55.8	427.2
14.86	37.85	1010.58	86.8	467.71
10.57	36.71	1022.11	82.39	472.62
30.09	76.2	1006.64	61.02	434.68
6.82	41.03	1022.12	87.63	489.64
15.4	41.16	1005.34	80.22	465.16
7.31	43.02	1014.19	86.43	484.82
32.56	68.94	1007.12	58.18	425.61
9.77	39.04	1023.73	76.06	483.87
29.22	72.39	1000.87	77.39	430.24
14.33	38.73	1003.52	85.92	468.86
23.36	74.93	1016.57	71.91	443.78
15.23	44.9	1007.75	81.34	456.07
26.82	65.27	1013.6	53.85	437.84
32.41	72.86	1003.69	58.04	432.75
12.92	39.35	1014.56	88.29	469.83
16.92	44.6	1017.34	58.75	460.17
17.18	63.09	1020.67	93.58	451.37
29.31	64.84	1010.49	53.97	442.11
27.04	48.41	1008.57	60.73	441.21
13.21	43.71	1024.5	86.59	466.39
12.3	39.85	1012.59	73.38	476.42
14.66	41.76	1022.12	78.13	463.6
29.1	73.9	1007.47	59.48	436.56
24.54	60.23	1011.55	72.78	445.25
25.24	68.67	1006.76	76.95	442.29
24.81	66.44	1011.19	69.96	435.79
8.75	36.3	1015.61	57.53	480.4
18.01	44.2	1018.84	55.72	456.36
28.44	67.07	1006.08	50.42	433.15
13.56	40.75	1016.05	74.64	474.26
8.13	71.14	1018.94	86.7	471.99
18.97	44.78	1007.87	47.98	463.46
25.66	70.02	1010.89	68.14	442.2
24.32	66.25	1009.09	91.89	444.93
16.7	46.18	1011.4	95.51	458.05
7.61	43.22	1014.8	86.92	478.55
9.01	38.56	1016.67	63.61	482.37
14.98	39.58	1011.78	75.07	467.77
30.24	67.32	1014.07	46.53	437.18
13.53	38.73	1004.86	85.38	472.46
16.73	43.79	1016.25	73.58	468.87
11.94	39.28	1017.04	89.88	475.59
25.68	67.79	1010.66	69.51	449.04
17.84	61.27	1020.1	70.68	454.57
22.66	61.27	1019.29	55.43	448.68
15.69	44.6	1014.06	61.51	462.07
22.88	63.91	1009.63	87.82	442.5
30.78	73.67	1005.97	58.7	427.15
18.44	45.38	1014.3	86.02	461.99
12.03	41.58	1015.09	90.43	464.02
27.74	74.78	1010.05	60.82	436.87
33.01	69.88	1006.71	53.25	433.5
10.56	41.54	1019.92	78.95	479.33
28.8	71.58	1010.51	59.87	434.82
18	44.06	1016.8	78.88	454.59
15.27	38.73	1002.83	77.77	465.99
6.26	41.31	1002.04	87.54	485.57
9.24	41.4	1018.34	84.91	477.65
19.65	51.3	1014.81	90.23	452.5
21.32	49.02	1008.81	85.81	445.65
8.43	40.69	1020.36	87.28	484.94
23.49	42.8	1013.96	65.31	459.9
17.88	46.97	1013.73	67.78	456.77
24.7	44.57	1008.24	57.62	444.65
28.4	74.93	1013.65	48.6	442.23
24.59	60.37	1005.31	76.81	438.09
18.28	60.1	1009.72	85.79	452.93
10.08	37.92	1010.47	66.37	474.63
14.48	46.18	1015.83	92.15	462.3
24.77	48.92	1010.25	47.04	448.25
26.13	79.74	1005.61	90.27	431.29
7.61	38.06	1021.16	83.22	484.14
22.06	59.21	1012.84	87.06	442.31
20.51	39.72	1002.25	47.97	452.39
22.99	56.57	1013.93	78.77	445.44
14.05	39.59	1011.2	94.54	464.63
10.95	40.81	1016.19	77.96	474.36
11.84	40.05	1014.54	86.78	473.82
20.76	51.19	1009	87.23	445
12.89	48.14	1017.48	83.95	463.77
26.62	72.43	1006.79	82.74	430.22
15.8	41.1	1003	77.36	465.87
17.8	43.72	1008.71	78.5	458.92
5.5	39.04	1021.46	78.91	478.65
12.38	44.2	1020.23	81.5	467.04
17.14	44.2	1018.91	62.18	457.02
9.41	39.61	1016.14	78.38	477.34
14.44	41.2	1015.96	81.97	469.85
11.68	40.55	1022.21	85.76	475.13
17.48	49.39	1021.51	84.53	460.01
13.87	41.74	1021.42	64.02	472.12
23.57	70.04	1011.06	82.79	437.53
15.85	49.69	1015.48	88.65	464.72
25.59	73.5	1011.19	81.52	435.48
13.95	71.14	1019.76	75.51	461.18
17.12	49.5	1014.79	87.03	463.39
23.99	67.69	1007.9	78.57	437.1
24.41	52.3	1006.28	70.33	442.62
30.25	71.8	1010.87	60.4	437.28
13.38	40.89	1010.48	92.55	472.15
27.55	73.68	1013.62	81.13	431.86
25.16	77.3	1000.73	86.4	439.37
34.15	68.51	1010.75	37.02	430.19
12.68	40.73	1017.66	92.08	465.94
24.64	58.49	1011.2	72.67	444.95
25.38	70.94	1007.87	73.59	446.31
31.35	71.32	1005.99	62.35	434.43
7.79	41.01	1024	97.2	477
19.19	63.31	1016.88	66.58	453.16
11.8	42.34	1020.25	93.54	466.52
20.47	63.07	1012.79	88.67	451.71
24.82	71.94	1010.5	64.67	438.69
29.6	71.58	1010.34	52.56	434.64
9.48	40.11	1025.49	73.81	472.16
28.42	73.4	1011.39	62.72	438.25
11.86	39.85	1013	66.92	478.29
14.48	40.89	1011.39	82.18	470.44
4.71	42.07	1005.35	82.26	486.79
21.7	60.77	1018.07	88.15	444.66
28.97	67.9	1006.19	65.81	434.7
14.1	44.84	1025.09	79.42	468.22
11.74	40.71	1020.64	82.15	470.05
23.82	48.92	1010.48	44.45	446.85
23.01	44.05	1006.56	74.95	450.67
25.77	68.08	1010.99	73.58	433.46
27	59.15	1013.12	61.39	440.58
11.92	40.62	1015.91	55.4	464.9
12.83	41.67	1012.84	84.29	474.81
13.69	43.22	1009.94	74.64	466.72
14.17	42.86	1030.94	66.47	466.2
12.82	41.58	1020.37	81.06	464.07
16.7	46.18	1012.6	96.15	455.93
6.5	41.14	1028.15	86.78	480.96
8.28	40.56	1023.29	79.44	486.4
28.46	69.75	1009.46	79.75	435.75
27.16	56.85	1012.07	39.05	437.4
14.12	42.86	1011.84	88.29	471.86
10.8	40.69	1014.3	87.44	478.19
21.4	44.57	1005.7	73.09	445.09
26.45	54.5	1014.96	65.55	450.76
27.39	66.93	1017.16	53.75	441.04
25.78	47.93	1003.67	67.23	442.46
9.5	37.36	1015.13	63.41	478.8
25.1	74.87	1010.01	79.41	439.93
31.98	70.17	999.43	59.42	430.92
11.71	40.05	1014.49	86.09	471.49
13.81	40.2	1013.66	88.16	464.23
21.95	68.63	1012.8	61.55	448.9
6.94	39.61	1017.74	81.43	480.07
14.26	42.86	1011.33	88.37	471.19
19.04	50.12	1010.53	100.09	446.59
14.65	39.28	1014.04	77.98	470.41
22.35	65.61	1016.27	73.93	448.41
33.33	73.03	1014.2	42.28	436.05
12.32	41.62	1012.16	88.37	455.71
29.55	66.25	1009.38	69.55	436.29
14.81	42.77	1017.83	75.09	463.06
19.48	58.66	1013.32	73.16	454.4
28.01	51.43	1011.6	49.2	449.82
31.46	70.79	1003.54	59.51	425.68
13.98	40.71	1022.72	71.83	474.46
27.32	73.42	1012.07	86.3	432.74
24.75	63.57	1010.47	84.24	445.3
28.29	61.86	1011.87	64.17	438.25
26.24	70.36	1005.4	82.43	437.31
9.54	41.17	1019.79	65.61	481.18
27.44	52.3	1008.15	58.92	441.75
20.86	51.3	1012.03	92.46	449.67
7.69	36.24	1013.08	88.37	482.46
22.97	64.15	1021	70.61	450.07
20.24	56.03	1019.78	59.8	460.76
8.5	39.16	1014.1	86.64	485.76
19.38	63.56	1013.13	83.54	452.01
21.31	58.05	1012.94	88.39	446.76
32.98	71.32	1003.67	49.78	433.56
26.49	78.92	1010.82	83.42	434.91
32.14	68.31	1010.48	42.15	436.15
9.45	43.5	1018.89	84.29	476.1
15.06	39.3	1019.63	63.32	464.15
15.7	44.21	1021.26	86.83	462.19
21.47	57.19	1006.45	75.8	448.31
9.08	36.71	1025.07	81.32	479.02
25.72	72.39	1003.01	86.38	432.77
20.25	63.91	1009.27	97.97	448.37
23.7	62.91	1012.26	57.89	444.99
31.84	71.37	1003.51	46.22	432.04
13.15	41.14	1026.72	80.31	461.49
10.33	41.44	1015.24	86.72	478.79
29.23	77.3	1002.71	65.24	438.05
20.29	65.27	1013.17	74.94	445.52
12.65	41.93	1023.07	65.05	479.53
25.06	65.46	1014.37	38.82	443.03
23	63.78	1015.85	70.46	444.62
21.9	47.43	1006.8	60.48	452.13
23.76	58.41	1013.85	85.38	445.85
10.05	41.17	1018.98	83.71	481.38
24.81	59.43	1009.42	54.64	439.33
25.69	64.45	1013.05	42	450.94
14.1	44.92	1023.95	89.5	467.22
10.17	41.46	1020.01	84.86	482.36
16.57	53.82	1015.17	63.69	462.52
19.02	44.85	1014.57	43.37	465.42
14.8	40.2	1012.87	88.35	466.27
29.39	69.89	1013.92	47.36	434.27
25.38	63.87	1018.7	52.48	442.13
13.52	42.34	1017.97	95.34	463.71
22.31	51.19	1009.38	79.72	444.74
17.55	43.14	1018.86	76	461.58
12.83	44.88	1017.86	87.88	474.26
26.77	74.22	1008.87	74.68	434.35
24.49	65.46	1015.77	44.95	445.27
15.21	43.56	1012.92	56.61	467
31.15	67.45	1014.85	42.11	431.97
19.45	38.52	1017.99	62.86	451.96
17.68	45.17	1017.5	77.57	461.96
22.01	58.46	1016.26	75.99	443.75
13.6	42.86	1013.37	87.52	472.27
17.63	40.55	1002.27	73.42	462.13
23.74	52.3	1008.88	76.34	444.4
21.34	51.61	1010.11	80.7	452
6.48	36.24	1013.62	92.03	484.65
24.32	59.14	1017.46	80.14	438.08
13.8	39.82	1012.37	83.69	473.56
30.74	71.77	1006.24	53.38	434.89
26.52	77.17	1008.71	92.32	432.48
24.01	46.93	1013.3	52.24	448.35
25.12	71.58	1010.18	87.5	433.58
33.26	68.51	1012.49	52.68	429.38
3.38	41.31	998.79	97.76	489.11
15.77	58.16	1016.09	82.56	450.11
10.75	45.01	1018.73	93.16	471.47
18.04	44.85	1015.13	48.4	463.31
20.79	50.59	1017.75	73.35	456.01
24.85	70.09	1006.56	70.09	439.96
14.87	35.71	1015.53	57.7	468.75
10.93	39.22	1019.44	64.94	473.27
9.51	40.46	1018.84	70.12	471.32
27.57	60.07	1016.52	54.75	440.12
26.13	48.06	1013.5	47.67	440.99
11.72	40.92	1023.35	88.55	465.88
13.32	41.7	1020.22	88.3	451.93
15.65	54.3	1018	69.66	461.69
28.98	70.8	1008.19	73.45	434.08
21.96	48.6	1004.87	76.27	446.56
21.29	47.45	1008.85	71.6	447.78
22	51.3	1012.87	85.79	450.18
16.49	49.39	1018.1	93.13	461.54
23.57	63.91	1011.65	80.74	441.93
22.72	69.13	1010.81	92.43	438.01
26.06	71.73	1009.65	77.02	432.38
31.11	74.16	1012.2	58.86	435.69
17.34	45.01	1013.22	77.71	459.01
24.42	64.79	1016.12	69.32	449.1
28.88	71.98	1005.37	74.24	428.61
14.28	42.77	1020.06	81.77	466.75
12.28	40.92	1023.23	89.14	460.33
19.92	38.52	1018.15	60.68	451.16
7.98	40.77	1008.69	98.65	480.72
29.17	72.99	1006.86	64.92	430.59
20.71	58.79	1017.48	86.67	444.39
25.15	62.91	1012.23	48.22	444.19
18.45	42.44	1013.45	63.52	459.79
27.96	77.24	1007.23	78.51	433.35
22.61	45.38	1013.92	62.91	459.53
10.62	39.64	1010.51	68.55	478.37
7.55	38.08	1019.37	76.32	485.49
28.84	74.67	1016.52	67.43	428.98
23.55	65.94	1011.76	58.44	443.98
19.11	44.85	1014.76	45.86	464.66
25.87	67.79	1011.16	79.88	445.87
11.68	40.55	1017.31	99.82	473.51
27.51	73.67	1005.71	76.75	431.97
14.43	39.82	1012.56	78.52	470.17
30.22	74.9	1003.57	67.15	434.17
18.41	44.9	1008.97	73.81	453.12
29.56	71.14	1011.42	53.18	432.09
31.54	77.24	1007.83	62.98	430.07
25.16	43.21	1011.73	88.69	442.29
30.75	73.88	1005.62	57.95	436.97
16.71	46.18	1012.06	96.6	458.4
20.29	63.09	1019.03	76.07	448.22
25.16	54.2	1012.69	58.02	441.99
22.56	66.48	1003.82	77.46	437.73
32.81	75.08	1005.09	42	433.37
27.04	69.98	1008.5	75.41	433.25
10.58	42.34	1022.32	94.01	474.91
22.91	66.44	1011.23	63.43	444.48
31.35	68.67	1005.26	66.85	433.73
10.55	41.55	1005.02	63.24	473.99
21.53	70.02	1010.33	95.95	440.93
13.42	38.91	1012.81	73.82	472.22
14.26	44.47	1028.81	72.19	465.77
21.89	74.78	1010.35	80.39	444.6
22.98	51.95	1006.83	74.92	454.63
18.63	61.27	1019.69	73.67	454.03
26.28	73.06	1008.06	90.7	437.01
10.12	41.55	1005.78	62.34	475.46
34.53	73.03	1013.53	36.74	437.03
25.55	71.64	1009.09	79.35	439.37
25.41	68.94	1007.21	69.2	436.95
25.59	65.46	1014.47	37.89	444.9
23.09	69.13	1010.93	90.07	436.67
10.31	40.67	1017.61	69.61	485.25
30.1	66.25	1009.38	65.41	434.99
16.81	42.86	1013.83	77.11	464.36
21.87	69.45	1014.04	71.19	439.97
26.75	43.21	1012.29	87.28	430.45
26.3	69.05	1005.37	41.7	438.12
27.19	64.96	1006.71	73.99	428.79
24.15	71.73	1009.76	85.16	436.55
29.28	77.17	1009.4	76.3	433.14
13.61	38.47	1015.1	54.98	466.51
22.04	57.32	1012.54	62.17	447.27
9.86	38.38	1018.22	85.35	479.56
25.81	66.51	1016.53	62.19	437.57
14.29	39.59	1012.36	92.38	463.13
23.15	69.48	1011.07	85.83	436.16
4.96	39.4	1003.58	92.22	486.09
19.11	58.95	1017.07	85.49	449.89
21.84	60.29	1017.23	66.89	454.4
[truncated: 7,569 more rows]

## Sheet: Sheet2
AT	V	AP	RH	PE
9.59	38.56	1017.01	60.1	481.3
12.04	42.34	1019.72	94.67	465.36
13.87	45.08	1024.42	81.69	465.48
13.72	54.3	1017.89	79.08	467.05
15.14	49.64	1023.78	75	463.58
23.63	60.93	1006.41	83.06	439.9
22.99	61.02	1009.88	81.56	440.85
12.85	40	1015.89	68.85	463.74
29.88	68.08	1011.14	55.78	429.33
23.22	66.56	1002.47	85.39	437.11
9.02	38.08	1019.02	69.98	478.32
26.12	75.6	1017.41	72.31	439.68
16.66	36.71	1013.68	70.66	466.07
29.56	52.84	1006.09	42.17	436.46
30	61.5	1009.4	48.63	435.6
30.39	70.98	1007.55	72.76	435.48
20.88	47.45	1007.5	76.21	449.34
28.14	61.47	1009.69	64.66	435.35
18.86	46.48	1007.28	78.47	452
31.85	68.3	1014.76	47.06	428.72
17.47	63.31	1015.28	88.22	450.68
25.04	51.95	1005.56	66.53	449.45
29.01	70.32	1007.26	60.55	429.23
22.36	59.44	1013.1	84.74	446.75
13.98	40.24	1017.19	87.45	467.2
19.6	59.21	1017.65	86.29	449.23
12.51	43.67	1013.24	91.55	471.96
22.76	58.96	1013.85	55.95	454.05
19.65	44.89	1009.76	75.36	451.35
14.78	38.58	1017.02	82.4	460.54
33.94	74.67	1015.94	28.16	427.98
7.55	42.85	1011.21	93.25	484.93
5.62	41.38	1020.91	86.21	490.83
20.76	59.04	1012.51	85.39	448.92
18.44	39.72	1001.14	66.83	460.44
12.78	41.04	1025.16	85.14	461.61
8.95	43.13	1017.56	94.85	479.14
31.95	70.8	1008.38	66.26	432.79
9.95	41.82	1033.09	69.44	477.52
22.25	59.8	1016.79	69.02	451.64
23.95	58.79	1010.45	74.34	448.32
32.5	73.68	1014.65	55.72	427.63
26.55	69.45	1013.92	52.22	434.55
13.55	40.1	1015.7	86.68	474.59
18.02	49.78	1003.86	100.09	451.41
28.41	75.6	1018.48	56.07	440.28
24.6	63.94	1012.87	80.28	439.63
21.01	60.1	1010.93	78.6	450.99
23.34	45.61	1012.73	74.09	455.82
30.89	74.87	1008.99	56.58	432.68
28.41	74.16	1010.29	72.09	439.2
26.5	66.75	1018.48	61.62	431.23
23.48	65.12	1015.82	60.83	445.66
30.21	79.74	1006.82	54.03	430.83
25.3	58.46	1015.91	69.71	439.25
27.28	72.58	1009.21	89.96	431.27
27.71	62.39	1006.43	68.21	435.84
22.96	70.79	1005.68	93.93	434.47
8.6	36.66	1026.4	81.23	481.86
13.41	40.89	1010.85	89.61	472.4
29.45	74.16	1010.49	64.87	438.11
22.46	58.49	1011.5	70.54	448.46
28.77	58.33	1013.73	36.6	448.06
25.61	52.36	1014.1	62.9	451.42
19.62	62.96	1020.76	76.53	456.02
25.06	65.46	1014.37	38.82	443.03
6.54	39.33	1011.54	93.69	491.16
29.22	72.39	1000.87	77.39	430.24
17.47	43.77	1012.25	76.78	456.41
22.08	45.61	1014.02	75.71	456.71
18.75	44.9	1007.99	75.76	452.77
24.55	58.86	1015.22	60.53	445.8
18.5	51.43	1010.82	92.04	459.42
30.36	74.87	1008.96	61.87	435.31
29.92	69.75	1009.12	67.15	441.5
23.62	73.67	1007	90.8	438.33
31.01	73.5	1010.92	48.61	432.41
19.84	65.48	1019.54	76.6	449.85
22.93	58.2	1017.75	54.09	444.95
22.12	57.19	1007.56	76.5	442.51
11.42	40.43	1025.5	75.85	490.02
12.51	41.14	1027.36	87.86	463.79
18.87	52.08	1005.25	99.19	449.61
29.87	73.91	1004.53	74.3	431.8
28.07	70.32	1007.17	67.02	430.29
15.46	42.07	1017.9	81.12	459.15
28.85	66.54	1010.73	43.27	437.79
14.03	49.15	1020.5	83.65	467.16
13.2	45.01	1013.96	78.78	466.71
13.16	43.41	1016.43	79.47	465.6
30.98	67.48	1009.96	58.92	439.39
32.92	69.05	1000.74	39.61	426.61
14.12	41.39	1018.73	76.51	472.88
10.22	41.74	1022.65	83.58	479.01
13.68	45.08	1024.91	85.26	467.02
25.72	49.82	1016.19	60.1	452.33
22.63	70.47	1008	82.27	441.92
24.56	58.82	1011.42	72.47	442.76
29.89	71.29	1009	55.72	431.45
28.35	71.14	1010.65	60.38	429.21
13.61	42.34	1017.78	88.84	466.17
22.11	59.8	1016.74	73.9	453.45
7.19	39.37	1019.67	70.77	480.4
10.94	43.67	1012.36	73.3	477.34
4.86	39.4	1012.73	91.39	488.63
23.13	61.47	1008.96	85.5	438.8
23.73	59.15	1014.08	62.65	444.07
7.73	37.8	1020.71	63.93	483.94
30.13	78.05	1010.99	61.5	434.14
34.53	73.03	1013.53	36.74	437.03
12.08	49.83	1008.21	96.01	467.54
27.62	68.27	1008.04	63.04	427.67
24.43	47.45	1007.68	65.18	446.45
16.73	58.59	1015.02	89.61	455.3
8.28	40.56	1023.29	79.44	486.4
18.63	50.16	1010.21	97.13	450.14
29.32	63.77	1013.24	55.1	438.09
30.04	67.25	1017.65	52.84	435.17
11.95	42.03	1017.58	90.89	465.2
14.04	44.21	1021.93	86.12	468.64
23.27	64.15	1020.98	71.18	452.26
17.48	58.95	1016.49	90.35	449.26
21.97	58.79	1010.93	86.7	448.8
13.64	34.03	1018.32	62.2	469.61
19.4	49.69	1012.89	75.53	455.6
15.86	43.02	1012.18	40.33	466.6
27.25	50.05	1006.53	60.64	439.63
28.9	60.07	1015.96	45.06	440.62
34.33	74.34	1001.74	42.75	435.76
19.8	52.9	1017.75	66.67	456.64
24.32	65.48	1017.55	59.02	443.31
16.77	49.39	1018.61	95.86	459.38
27.6	69.34	1009.63	71.58	440.6
26.16	59.87	1013.24	71.92	446.73
26.62	71.73	1009.32	80.1	431.93
20.29	65.27	1013.17	74.94	445.52
15.94	41.76	1023.32	67.17	462.44
18.34	50.59	1018.42	83.95	457.17
20.62	48.41	1007.37	87.51	445.4
14.33	38.73	1003.52	85.92	468.86
24.42	62.66	1007.65	71.57	443.09
23.09	60.95	1015.02	68.78	450.31
15.72	56.89	1013.35	85.06	456.33
23.02	69.94	1007.94	64.66	439.4
21.6	59.8	1016.9	76.59	450.14
32.22	70.8	1009.9	62.03	433.07
26.95	48.41	1008.53	62.94	436.54
23.49	73.18	1012.4	90.05	437.01
27.37	76.09	1007.52	89.12	433.34
25.63	69.89	1015.17	77.42	434.47
8.41	40.67	1019.97	69.2	489.25
29.33	52.84	1006.04	44.3	438.25
11.36	41.48	1012.8	76.16	465.37
11.44	44.2	1018.14	84.9	476.12
27.86	65.18	1012.87	55.53	436.26
22.99	68.67	1006.65	77.62	446.67
14.44	39	1017.06	76.02	466.96
23.43	54.42	1013.58	70.99	454.86
8.48	38.5	1013.5	66.51	485.29
22.78	71.77	1005.26	89.23	435.46
26.39	71.25	999.8	89.12	430.34
31.54	72.58	1007.61	65.57	427.31
16.71	40.56	1019.48	49.88	467.46
17.55	43.14	1018.86	76	461.58
31.68	70.79	1004.05	54.5	429.55
7.68	39.96	1023.73	87.48	477.84
29.99	74.9	1003.84	64.43	435.87
26.05	65.38	1009.43	52.1	449.82
7.28	38.56	1018.96	67.98	485.57
23.47	65.61	1014.57	69.83	447.16
7.94	35.77	1017.04	63.22	480.38
26.72	65.61	1014.41	52.01	442.48
11.44	43.13	1014.88	63.88	477.57
29.12	66.51	1015.69	37.9	432.88
19.25	43.43	1012.01	73.26	451.08
9.06	41.92	1029.9	90.88	473.37
16	43.34	1013.58	78.87	461.7
10.02	42.44	1014.57	99.16	478.5
21.83	57.85	1012.49	75.16	448.21
26.92	62.44	1011.09	70.8	437.99
16.47	38.01	1022.3	72.29	461.54
5.5	39.04	1021.46	78.91	478.65
18.74	45.09	1014.24	41.54	456.25
30.02	73.5	1010.52	44.91	429.84
27.22	69.04	1008.89	70.62	440.85
12.05	48.04	1009.14	100.13	464.14
6.67	39.37	1019.99	75.61	486.84
12.47	45.01	1017.8	95.25	467.18
25.66	77.54	1008.22	78.42	432.82
20.59	59.8	1015.27	77.94	453.83
7.19	40.81	1015.22	85.65	487.15
32.33	69.89	1014.18	50.93	427.29
31.27	69.13	1009.45	57.01	425.48
19.04	68.28	1004.52	86.16	444.54
9.25	41.26	1020.51	91.21	473.87
14.84	42.03	1017.47	79.27	466.2
12.05	40.55	1016.63	100.14	472.19
29.82	43.21	1011.52	63.54	433.31
21.87	69.45	1014.04	71.19	439.97
18.8	44.78	1009.65	46	462.79
11.15	41.26	1022.67	81.83	473.57
22.3	67.25	1017.33	75.85	453.27
28.5	64.84	1011.47	54.41	441.74
9.27	40.22	1008.1	89.24	481.23
28.24	64.69	1007.35	61.14	438.03
9.38	41.44	1015.09	86.8	481.96
29.59	74.78	1009.45	55.75	436.77
14.29	37.85	1009.98	92.81	468.63
19.08	44.63	1020.14	43.36	459.81
15.07	43.48	1015.22	57.74	459.96
26	69.89	1015.12	73.06	433.5
28.18	73.03	1014.18	67.72	439.74
22.53	60.95	1015.12	75.1	449.43
29.6	71.58	1010.34	52.56	434.64
11.82	41.17	1019.5	55.74	475.61
11.73	37.92	1008.24	65.13	472.04
27.19	64.27	1013.06	58.13	444.54
9.32	41.39	1020.03	70.21	481.88
21.45	66.05	1014.81	73.73	453.38
23.36	72.24	1010.99	94.41	434.15
29.35	71.58	1010.07	61.8	434.45
24.69	71.73	1010.13	70.54	436.78
27.34	59.87	1012.06	59.04	448.26
30.19	66.54	1004.39	61.43	428.37
19.8	57.25	1010.84	88.9	451.75
23.24	63.78	1017.1	63.8	446.95
17.03	47.83	1004.94	79.68	460.43
22.84	71.25	1001.9	96.45	433.85
31.14	67.32	1013.93	38.37	436.64
31.3	70.79	1004.3	54.37	428.75
18.77	49.21	1012.2	58.69	454.86
22.07	48.41	1008.71	81.29	444.01
5.07	40.07	1019.32	66.17	494.87
34.65	74.67	1016.03	26.67	427.69
15.92	40.56	1020.79	53.52	470.22
10.08	40.72	1022.7	67.3	480.8
25.64	63.47	1012.33	68.35	442.62
21.11	65.94	1009.83	71.91	448.77
9.29	39.96	1026.2	97.55	473.51
10.32	41.01	1021.04	95.3	467.81
32.31	68.94	1006.11	71.78	431.14
25.08	61.02	1010.01	73.21	437.31
32.16	76.2	1008.04	51.74	433.29
17.68	39.08	1002.77	74.24	454.18
14.15	39.28	1013.5	77.63	471.23
28.37	67.07	1005.65	56.13	435.94
27.31	59.54	1006.24	71.99	440.13
30.51	70.94	1007.64	59.42	430.91
14.38	40.66	1016.34	92.37	463.1
26.67	59.44	1012.01	58.83	441.29
18.83	48.98	1016.33	74.23	453.28
21.36	58.95	1018.35	78.87	443.93
10.99	43.5	1021.1	93.64	469.34
8.35	43.52	1022.78	97.34	479.31
12.83	44.88	1017.86	87.88	474.26
25.22	71.85	1009.78	68.96	438.71
18.89	63.09	1018.47	84.85	450
33.82	72.29	1008.67	46.95	432.13
10.71	39.61	1018.72	73.66	473.77
19.36	44.6	1016.25	45.65	464.56
25.97	69.34	1009.43	88.11	435.02
31.95	67.17	1007.11	61.58	432.6
15.69	37.64	1016	83.88	462.18
23.45	66.48	1003.66	75.83	435.13
31.98	70.17	999.43	59.42	430.92
17.03	58.49	1011.91	92.16	460.48
23.48	66.44	1011.28	61.11	443.21
15.11	45.01	1017.01	84.39	462.21
13.2	40.83	1007.75	94.98	472.41
18.41	44.9	1008.97	73.81	453.12
17.51	53.16	1013.13	82.86	457.45
29.12	67.32	1014.21	48.8	435.2
28.08	73.42	1012.17	62.74	434
25.65	69.23	1012.55	62.02	435.25
31.54	77.24	1008.23	70.19	431.27
21.92	61.87	1009.68	58.83	445.52
32.37	67.83	1008.32	57.39	426.76
22.42	71.77	1005.5	90.62	435.06
7	36.24	1013.15	89.64	483.06
16.37	43.5	1021.26	72.4	459.18
17.51	58.86	1016.78	83.63	453.2
21.52	50.66	1013.56	74.33	455.71
29.24	60.23	1009.62	59.71	438.24
23.27	68.28	1005.01	74.83	444.86
13.71	43.41	1015.45	69.26	466.06
24.9	58.49	1011.06	65.14	444.19
28.91	70.72	1009.7	67.5	439.94
27.01	63.78	1016.72	47.89	442.6
25.5	63.91	1009.4	75.22	444.26
23.73	61.02	1009.71	78.7	442.22
25.05	58.59	1013.37	66.14	442.93
23.82	63.76	1009.8	68.94	440.52
27.44	65.59	1010.76	68.67	441.08
10.27	40.64	1020.63	84.6	474.99
20.47	58.16	1016.97	68.6	453.99
10.38	43.02	1013.37	78.53	474.44
22.57	62.4	1009.77	86.05	444.69
19.46	60.07	1014.81	66.61	451.89
32.45	44.37	1005.05	44.37	429.81
21.24	50.32	1008.54	84.83	447.32
22.25	43.79	1015.78	52.68	461.93
17.89	42.42	1008.92	65.08	467.59
27.07	66.93	1017.32	55.38	446.48
17.96	47.83	1005	85.72	454.59
23.38	58.82	1012.27	77.87	446.54
22.53	62.39	1007.84	86.4	450.08
24.25	50.78	1008.82	60.55	443.8
13.75	41.49	1019.9	88.23	469.02
23.95	51.86	1014.24	68.28	449.81
12.82	38.62	1018.71	83.8	467.41
11.57	41.54	1020.13	69.14	476.89
17.3	42.24	1017.07	64.52	469.21
18.71	54.9	1017.12	74.79	456.88
25.89	74.22	1007.43	81.55	433.73
24.62	70.47	1010.55	72.71	435.88
14.46	42.86	1031.34	69.84	464.44
14.82	44.2	1018.98	72.8	465.73
10.13	38.16	1013.57	79.04	474.92
18.21	62.26	1011.97	87.28	455.88
14.58	41.92	1030.42	61.96	462.69
10.62	39.64	1010.65	62.15	477.07
18.13	66.86	1012.9	78.84	454.85
26.9	60.93	1007.1	67.32	435.87
23.8	48.6	1002.43	67.32	440.89
30.88	67.83	1008.97	54.99	425.36
24.17	71.58	1010.16	89.96	436.27
25.66	70.02	1010.89	68.14	442.2
23.39	73.5	1011.37	88.48	441.18
7.67	35.77	1017.55	60.97	480.06
22.43	63.94	1012.76	93.24	444.53
22.35	63.47	1013.21	82.52	440.11
29.18	71.43	1011.65	59.49	443.75
10.89	44.2	1018.3	86.32	479.16
32.96	73.03	1013.56	54.03	438.93
21.4	74.93	1014.58	80.85	434.09
4.56	40.27	1011.13	80.24	493.87
21.97	58.12	1014.21	85.93	448.91
30.9	73.42	1011.21	65.32	433.44
25.16	60.23	1011.21	68.31	444.98
27.79	69.23	1012.86	45.71	435.06
29.29	71.14	1011.49	49.97	432.58
25.75	60.95	1014.75	53.3	443.73
19.76	48.92	1010.48	46.57	456.69
25.1	61.47	1007.84	75.75	447.27
28.32	66.54	1010.28	45.6	436.42
23.66	77.54	1008.5	85.32	435.38
21.84	64.69	1007.57	77.34	450.25
23.37	63.87	1016.67	60.44	446.42
13.11	41.44	1015.55	74.45	471.61
22.64	63.73	1013.88	84.22	447.21
7.1	41.74	1022.25	91.07	484.12
14.81	42.77	1017.83	75.09	463.06
16.52	44.88	1017.61	90.08	459.73
17.77	52.9	1020.11	81.51	457.98
26.74	49.02	1008.18	67.59	438.06
28.46	49.16	1004.61	38.1	438.02
21.39	64.27	1011.71	95.39	445.12
20.77	69.51	1012.96	62.89	442.82
12.06	52.72	1024.53	80.05	467.21
8.3	36.08	1020.63	80.42	481.6
24.75	69.45	1013.97	53.49	438.28
12.41	37.92	1008.09	65.23	470.49
29.46	49.3	1003.88	54.1	436.37
7.23	41.22	1015.23	98.04	483.31
14.51	42.77	1017.47	81.95	463.37
19.31	60.07	1014.86	69.37	453.47
33.38	71.06	1008.1	64.83	430.98
21.51	48.92	1010.36	38.27	455.11
11.68	40.55	1006.48	96.16	474.8
18.78	63.09	1019.22	80.2	452.86
22.84	67.32	1013.77	64.67	438.36
26.03	70.32	1008.81	71.35	438.15
28.09	63.31	1013.01	52.6	438.6
14.5	41.76	1023.94	84.42	464.23
15.31	41.35	1005.09	95.25	466.5
18.59	41.1	1001.93	58.16	459.72
17.44	44.89	1009.9	80.54	457.67
14.9	52.05	1015.11	77.33	464.82
24.81	63.73	1009.34	83.61	440.43
15.23	37.87	1020.17	85.02	464.02
15.12	48.92	1011.8	72.93	462.59
33.79	69.05	1001.62	40.13	435.1
16.18	43.99	1021.97	80.96	460.81
12.76	40.27	1006.58	49.34	474.03
27.14	63.13	1013.38	75.68	438.82
14.2	42.86	1031.96	69.59	468.63
9.06	43.79	1016.05	81.32	482.8
16.79	49.25	1021.21	68.8	458.42
18.06	56.65	1020.2	81.59	459.14
10.8	41.66	1013.79	81.96	475.51
13.03	42.86	1014.39	86.25	475.03
25.27	69.89	1015.21	79.33	436.33
13.74	45.08	1024.97	84.79	466.79
24.82	57.19	1007.82	71.46	439.91
14.3	54.3	1015.16	75.29	464.9
30.07	70.04	1010.84	55.74	426.35
19.41	46.63	1013.23	86.28	452.6
20.83	49.02	1009.45	91.92	445.31
23.84	49.21	1013.35	45.4	446.54
21.09	50.9	1012.42	69.09	456.09
35.01	74.67	1016.1	26.3	428.48
29.6	67.79	1010.37	51.05	442.43
10.12	43.72	1011.33	97.62	473.05
21.03	67.45	1015.01	68.59	447.11
14.05	39.59	1011.2	94.54	464.63
30.39	66.54	1002.7	59.15	428.89
15.61	41.2	1016.12	75.28	467.81
32.63	69.89	1013.85	41.66	425.72
29.72	54.2	1012.86	38.48	438.84
17.62	43.52	1021.01	71.52	457.45
32.39	79.74	1006.92	58.58	430.12
11.44	41.39	1019.59	79.95	478.52
19.7	51.3	1014.88	88.1	454.94
25.18	56.89	1012.26	64.46	442.42
29.86	64.79	1017.37	44.8	439.89
18	44.06	1016.8	78.88	454.59
5.47	40.62	1018.66	83.61	481.56
10.06	43.22	1014.1	85.7	473
24.95	76.16	1006.2	76.16	437.47
8.49	43.69	1016.93	85.63	483.62
25.87	44.57	1007.43	55.92	445.79
29.04	60.07	1015.42	46.15	440.43
26.8	72.58	1008.94	78.24	428.62
31.03	74.33	1011.55	63.45	429.35
22.73	66.75	1018.13	84.06	437.93
15.32	45.01	1013.3	83.72	459.31
9.06	40.02	1031.16	82.04	478.01
27.91	64.79	1017.7	48.29	440.53
9.34	41.49	1020.58	97.59	471.04
12.07	39.99	1009.7	93.27	473.06
28.83	66.44	1008.47	77.49	430.01
19.94	44.9	1008.52	74.69	459.47
20.64	49.21	1014.86	58.47	454.2
14.45	43.71	1025.26	84.23	463.6
14.14	39.59	1010.84	96.02	465.23
27.33	51.43	1006.18	67.6	439.12
24.67	69.14	1006.25	88.51	440.03
22.52	67.32	1011.4	66.2	443.49
11.54	45	1022.77	80.79	482.34
22.7	60.84	1019.15	71.48	438.59
26.84	71.94	1006.6	79.12	427.2
7	35.77	1018.21	64.84	482.8
30.01	68.27	1006.88	51.67	428.6
29.32	71.29	1008.34	51.51	432.17
26.75	43.21	1012.29	87.28	430.45
22.59	59.43	1005.85	84.02	442
30.9	69.4	1003.53	66.69	425.3
20.25	44.78	1007.93	40.16	462.44
14.18	39.3	1020.1	67.48	464.32
8.26	44.71	1020.85	68.82	485.19
25.74	65.38	1009.6	54.34	452.94
23.09	63.91	1012.23	83.25	447.9
24.66	60.29	1018	59.56	445.26
32.33	67.83	1008.11	57.48	427.84
24.33	46.93	1013.83	44.59	447.54
22.48	71.29	1008.15	75.41	444.71
21.39	51.3	1013.39	89.05	452.7
33.95	68.14	1002.33	48.98	427.25
16.62	54.3	1017.99	63.76	459.59
25.58	64.45	1011.07	61.47	447.16
10.22	39.96	1025.05	96.05	471.36
9.45	43.5	1018.89	84.29	476.1
10.1	40.22	1007.1	90.36	478.43
30.8	69.14	1007.68	63.78	433.62
23.39	61.87	1010.35	48.91	444.03
6.23	40.96	1022.49	93.15	488.82
20.96	61.27	1019.99	67.32	448.77
12.08	41.39	1019.45	78.3	477.8
26.45	47.43	1008.87	53.25	442.12
32	73.17	1009.94	40.48	428.69
5.42	41.38	1020.77	86.02	491.38
12.72	44.9	1007.6	71.8	463.49
23.59	43.77	1010.85	55.98	448.42
30.25	68.24	1006.58	31.9	432.05
5.71	45.87	1012.04	93.42	482.49
28.13	56.9	1007.17	51.66	436.95
28.98	62.66	1009.1	52.62	438.45
22.58	58.12	1014.88	80.59	448.32
20.41	50.32	1008.45	93.12	447.06
16	43.02	1012.37	39.2	466.01
18.18	61.87	1008.64	66.28	453.1
18.4	43.96	1012.4	77.81	464.63
22.55	47.45	1008.65	67.9	447.42
16.76	53.16	1014.13	81.87	457.98
20.13	43.43	1009.75	66.16	453.47
27.75	69.89	1015.41	73.01	430.33
23.64	70.04	1011.09	83.35	435.21
22.3	57.19	1006.4	75.28	445.1
33.24	74.34	1002.58	45.05	435.5
8.9	39.96	1026.31	95.46	474.49
9.44	40	1015.62	81.16	471.32
7.71	40.77	1021.93	87.04	482.19
27.55	64.96	999.73	57.34	431.33
27.44	52.3	1008.15	58.92	441.75
10.29	40.56	1017.28	69.13	481.7
19.31	43.56	1013.65	41.54	463.35
26.9	69.59	1008.9	85.08	434.1
13.48	39.35	1014.56	81.25	470.66
21.94	56.85	1011.01	77.72	442.63
26.75	70.32	1007.61	54.09	433.46
28.76	66.56	1006.07	62.41	432.3
19.7	43.79	1015.93	47.39	464.41
13.9	39.59	1011.84	94.74	465
15.16	50.88	1013.88	100.11	460.03
27.11	48.6	1002.78	53.39	439.4
30.92	80.18	1010.11	72.47	432.35
10.8	40.22	1011.25	84.57	478.21
7.54	40.72	1023.82	85.15	485.92
25.96	71.64	1003.84	86.83	432.93
6.4	39.18	1024.6	86.83	484.44
13.56	40.75	1016.05	74.64	474.26
24.91	64.45	1013.02	42.34	450.84
21.65	56.89	1013.13	66.07	445.93
30.36	68.08	1010.76	51.32	429.97
11.99	49.83	1008.33	95.2	468.22
23.55	51.95	1006	76.46	449.54
19.95	50.66	1013.21	81.98	458.72
22.88	69.45	1014.02	65.13	441.76
19.7	52.84	1004.86	89.72	444.64
31.15	66.25	1008.89	61.08	437.55
16.65	56.89	1013.52	87.44	452.52
15.85	46.18	1013.14	97.8	462.88
16.09	48.78	1015.78	91.12	454.23
8.13	39.96	1026.07	95.84	477.12
8.48	42.49	1010.77	88.68	483.5
9.27	39.64	1010.79	79.56	480.29
12.19	44.63	1018.96	80.91	468.91
12.33	37.73	1022.46	59.3	470.11
23.59	47.43	1006.64	48.92	447.36
12.09	38.25	1013.61	81.28	469.29
16.88	56.89	1014.01	82.1	457
17.34	44.06	1015.84	74.88	458.5
33.58	77.54	1010.19	53.49	433.75
27.4	66.48	1004.71	51.5	439.66
8.96	40.02	1031.21	82.32	475.47
16.01	65.46	1014	87.68	454.16
26.04	74.67	1016.68	81.2	433.55
21.9	47.43	1006.8	60.48	452.13
32.82	68.31	1010.44	41.85	441.06
26.72	67.79	1010.35	63.31	444.68
24.91	58.69	1008.22	82.81	435.96
17.72	48.14	1013.26	65.09	457.44
25.06	62.39	1008.09	82.56	438.31
17.08	58.86	1016.04	87.46	449.98
9.31	41.39	1018.3	93.68	480.25
23.44	62.52	1016.46	67.21	447.19
16.71	46.18	1011.61	95.82	459.4
20.19	62.26	1011.37	89.69	443.58
15.21	43.5	1021.6	82.06	464.08
18.99	59.27	1012.15	89.39	453.4
13.78	38.47	1015.2	57.8	466.41
27.36	63.31	1013.7	51.58	440.4
20.06	52.84	1004.21	82.12	447.47
21.36	45.61	1013.43	83.64	456.85
23.39	68.51	1013.09	78.6	438.35
22.27	48.98	1014.47	49.33	451.74
10.68	38.38	1020.79	72.33	476.22
31.33	76.86	997.85	64.43	431.44
23.41	54.42	1012.86	70.12	454.68
32.86	68.51	1008.43	46.78	432.38
26.2	74.67	1016.69	84.38	430.22
16.82	45	1022.05	37.28	468.22
25.43	70.17	1000.46	87.84	436.43
15.92	44.85	1015.84	59.99	467.41
19.47	50.9	1012.77	77.33	457.08
21.17	52.3	1009.36	81.51	447.5
14.01	45.08	1023.28	82.49	464.79
14.48	38.92	1015.6	90.05	470.63
26.2	72.24	1011.3	78.29	432.65
25.22	69.88	1007.17	80.26	443.24
22.33	45.87	1007.8	63.61	447.02
5.01	39.4	1003.69	91.9	475.34
8.05	40.8	1028.01	89.56	483.43
14.86	44.71	1018.3	49.46	466.38
23.12	69.71	1008.98	84.41	442.21
22.3	50.78	1008.85	81.27	449.86
16.45	44.68	1018.6	85.14	462.66
10.08	43.14	1010.67	85.9	478.73
30.39	71.8	1010.87	64.11	435.82
6.17	41.31	1002.49	87.59	481.27
23.69	77.54	1009.32	89.7	440.21
16.38	46.97	1013.6	73.67	459.87
21.91	48.7	1006.89	83.97	449.8
13.69	34.03	1018.45	65.76	469.12
12.1	44.77	1019.1	75.85	463.11
28.45	52.84	1006.18	43.16	439.86
32.21	70.94	1006.76	47.56	430.06
22.4	58.12	1015.24	78.03	449.13
16.76	45.09	1014.28	57.71	458.67
29.03	69.51	1009.8	47.04	435.09
24.73	71.14	1009.07	68.87	437.55
19.41	67.32	1012.34	78.8	446.71
21.12	63.91	1009.33	96.14	447.64
18.51	48.06	1015.14	79.83	455.44
26.14	69.14	1007.1	88.27	439.03
15.24	40	1017.34	65.16	454.64
11.22	41.66	1008.96	72.38	477.53
5.54	45.87	1008.69	95.91	478.02
20.95	48.14	1013.3	67.72	452.38
18.15	45.01	1013.06	72.4	455.21
15.69	37.87	1022.63	87.71	462.16
29.56	51.43	1005.87	59.22	437.93
25.76	65.48	1017.82	54.77	441.14
11.61	40.81	1025.68	72.08	473.08
22.49	61.27	1019.6	57.1	448.51
17.48	49.39	1021.51	84.53	460.01
10.39	44.85	1014.22	78.42	478.05
18.56	42.18	1001.46	99.59	456.61
13.25	43.7	1013.61	76.05	472.22
19.65	42.23	1013.04	75.9	461.16
22.83	70.79	1006.36	92.07	438
24.73	48.6	1004.03	63.37	439.99
27.28	78.92	1011.05	75.48	434.78
23.07	49.02	1009.07	84.1	444.22
24.26	42.8	1013.72	61.62	459.65
28.15	72.99	1007.62	70.03	431.83
23.7	70.32	1007.21	66.85	439.59
7.98	39.61	1018.57	77.04	479.78
30.27	64.69	1006.3	53.69	435.67
19.98	49.15	1021.56	63.89	457.54
11.53	41.14	1025.63	88.54	469.04
15.09	41.76	1022.4	76.22	463.27
12.15	38.78	1013.34	95.05	474.15
13.45	40.73	1018.7	93.88	461.03
25.1	69.89	1015.42	85.81	434.98
21.53	52.84	1005.06	88.22	444.04
26.64	73.56	1004.98	93.31	432.93
25.72	70.47	1010.44	70.57	434.94
9.59	40.11	1026.05	74.27	470.71
11.09	41.58	1020.99	91.09	464.81
10.38	40.92	1021.53	95.18	466.46
9.88	40.71	1015.34	84.32	471.8
17.48	43.14	1018.68	74.85	459.59
16.44	44	1024.48	76.51	460.33
28.32	71.64	1004.73	72.71	436.31
25.41	65.12	1016.01	53.39	442.86
17.85	48.14	1017.16	86.68	451.9
26.28	73.06	1008.06	90.7	437.01
14.46	45.87	1009.21	84.09	464.5
13.67	42.32	1015.41	79.04	464.56
15.43	38.58	1016.58	81.17	463.44
14.47	48.14	1017.28	87.36	457.45
9.12	41.49	1020.58	96.23	475.69
14.37	40.56	1021.67	68.18	470.19
16.94	50.59	1018.75	94.22	460.64
14.12	39.52	1016.79	75.89	472.32
15.63	44.9	1009.38	82.8	457.44
23.68	59.27	1010.75	83.82	440.44
6.06	43.65	1014.36	83.94	480.74
9	39.18	1024.38	84.91	483.26
8.27	38.56	1016.47	66.6	485.31
27.22	68.3	1016.84	64.88	436.81
17.86	50.88	1015.59	88.28	457.33
14.79	47.83	1007.27	92.04	463.22
25.02	60.29	1017.49	54.75	445.61
17.89	44.6	1014.48	42.51	463.99
21.04	65.46	1017.22	63.02	452.12
14.85	38.91	1014.48	60.98	467.42
22.79	50.78	1008.65	58.39	447.12
28.64	69.23	1013.11	37.13	434.4
28.56	65.27	1013.28	49.95	437.45
29.14	61.5	1009.64	39.95	437.76
26.49	71.73	1010.07	74.48	431.06
29.71	71.85	1008.81	70.86	428.49
30.01	69.13	1010.11	62.42	425.75
16.6	41.93	1022.01	48.98	467.51
20.3	67.32	1013.49	80.9	441.51
8.37	40.92	1021.82	86.03	476.02
10.74	40.05	1015.45	87.33	477.93
26.6	61.41	1012.35	54.42	451.4
18.77	52.08	1004.02	99.86	449.62
25.68	70.32	1009.08	90.48	431.32
12.97	49.83	1008.69	91.49	452.07
22.97	72.24	1011.15	95.85	437.41
11.44	34.03	1018.57	74.06	476.06
26.88	79.74	1006.54	93.7	434.77
27.39	66.93	1017.16	53.75	441.04
32.25	77.54	1010.46	54.57	430.86
19.46	46.33	1013.77	89.62	452.11
5.82	40.62	1016.79	85.04	482.67
8.95	43.56	1015.04	81.53	485.21
11.02	38.28	1013.51	95.66	472.11
14.87	35.71	1015.53	57.7	468.75
11.47	40.27	1005.39	77.4	479.44
25.62	73.17	1011.65	86.45	430.56
26.38	49.5	1012.82	37.19	457.81
10.95	40.22	1010.04	78.96	477.23
13.11	41.58	1020.43	74.32	460.44
16.77	50.9	1013.24	84.4	459.91
23.01	44.05	1006.56	74.95	450.67
12.53	44.03	1007.21	84.2	470.04
15.56	40.12	1013.72	89.78	461.21
14.3	42.99	1007.32	73.72	467.9
12.14	40.27	1007.57	73.22	472.84
13.7	42.86	1030.68	79.77	470.28
22.81	58.96	1013.5	55.66	452.89
30.67	71.29	1008.36	52.08	430.28
26.98	72.58	1008.55	78.5	431.12
31.96	71.29	1008.39	47.51	433.04
22.56	48.92	1010.7	51.63	445.07
30.32	64.69	1006.35	51.36	436.72
18.36	56.65	1020.29	82	456.49
14.59	41.23	999.48	86.66	466.83
27.82	76.09	1007.83	76.07	434.52
7.11	40.77	1022.4	90.95	475.55
8.34	40.77	1010.84	90.01	480.48
24	75.23	1010.69	72.46	443.78
25.71	71.64	1008.85	77.31	438.16
11.61	41.17	1019.57	58.82	476.81
22.21	61.87	1010.9	54.22	446.62
23.61	59.39	1015.11	78.84	438.08
12.68	40.73	1017.66	92.08	465.94
25.21	60.37	1006.01	73.14	436.23
14.6	44.47	1028.46	69.96	465.24
7.48	38.5	1014.01	77.35	488.43
31.11	74.16	1012.2	58.86	435.69
27.06	77.17	1008.71	90.6	432.2
30.84	66.75	1017.54	40.69	432.03
12.43	41.62	1011.87	80.57	460.61
5.17	39.33	1009.68	94.19	485.46
30.71	64.05	1011.75	62.81	438.42
16.38	55.5	1019.8	82.44	464.58
11.46	39.3	1019.53	76.86	475.51
10.05	41.58	1021.35	95.19	469.03
31.46	66.54	1002.86	53.75	427.76
24.81	60.95	1014.72	54.71	446.09
19.81	66.54	1013.88	80.09	449.07
30.91	76.2	1008.53	58.08	434.94
14.43	41.76	1024.02	83.57	467.33
27.45	64.34	1007.12	65.87	440
12.85	40.92	1023.04	84.04	461.05
29.13	66.56	1006.63	52.85	439.31
14.48	40.83	1009.42	81.74	469.64
7.51	41.01	1024.61	97.41	477.61
23.9	61.47	1009.01	81.05	438.73
19.13	50.78	1008.51	87.54	447.03
29.72	77.95	1014.9	72.73	434.99
27.91	63.76	1010.27	65.67	435.21
25.65	49.3	1003.73	68.48	440.05
27.17	61.25	1013.03	70.43	435.9
30.86	70.32	1011.88	62.68	433.71
23.35	71.77	1005.99	90.79	434.6
24.04	72.43	1008.02	87.2	439.39
22.56	47.43	1006.72	54.82	448.65
17.86	45	1023.25	53.48	465.78
9.08	36.18	1020.24	68.37	477.26
25.45	74.33	1015.53	80.95	435.12
27.18	79.05	1008.99	94.32	434.01
13.87	41.74	1021.42	64.02	472.12
16.07	47.83	1006.99	86.49	458.18
24.84	71.73	1009.84	82.41	436.36
25.74	59.07	1007.37	79.89	441.05
17.47	58.16	1016.36	82.26	456.97
31.16	67.45	1014.69	32.25	428.35
29.5	72.86	1004.63	52.17	439.43
30.26	59.22	1013.18	61.08	442.98
14.26	40.92	1022.07	73.96	460.38
19.89	68.08	1012.65	80.25	448.71
13.23	52.72	1026.4	75.78	465.26
18.84	67.32	1012.63	81.89	449.21
14.76	40.71	1017.37	71.07	465.58
26.38	70.47	1007.36	76.91	434.02
25.5	63.56	1013.85	64.69	442.28
11.09	40.43	1025.47	74.97	490.96
25.23	61.86	1013	76.18	441.48
27.42	65.74	1013.43	69.42	440.52
30.75	73.88	1005.62	57.95	436.97
7.6	41.04	1021.82	88.97	475.32
21.2	59.39	1014.04	85.06	444.57
24.4	41.1	1002.14	38.75	451.66
9.24	41.4	1030.72	87.36	476.9
24.49	65.46	1015.77	44.95	445.27
20.78	62.52	1017.58	73.3	452.3
11.3	40.55	1005.97	97.99	476.72
12.48	40.67	1011.24	61.1	475.96
26.44	59.15	1013.35	60.71	439.65
27.75	70.4	1006.65	90.21	436.53
23.18	72.99	1009.01	90.09	439.12
6.43	36.08	1022.73	85.03	486.39
10.38	41.01	1020.8	94.26	465.9
29.78	74.78	1009.28	55.09	436.39
24.1	71.29	1007.96	67.56	442.8
7.28	39.81	1017.61	87.56	483
25.15	68.61	1011.03	53.59	447.91
14.81	43.69	1017.19	71.9	470.71
21.14	48.78	1020.39	86.2	450.35
10.54	41.93	1016.64	93.52	479.65
29.52	64.79	1017.53	44.83	439.6
14.82	42.74	1028.04	69.81	466.34
21.16	45.38	1014.65	73.06	458.63
28.98	70.8	1008.19	73.45	434.08
17.88	46.97	1013.73	67.78	456.77
30.56	71.25	1000.3	70.55	431.92
10.91	39.61	1018.44	64.38	469.42
24.01	50.16	1004.22	75.32	443.03
20.58	54.5	1015.04	89.83	467.76
22.89	48.98	1014.55	48.21	448.56
21.63	60.84	1018.16	77.53	445.93
6.72	38.91	1016.89	90.47	485.89
13.47	44.88	1017.56	93.23	476.67
13.78	42.03	1017.51	84.94	467.6
18.58	63.78	1016.24	78.74	453.96
29.78	73.42	1011.27	52.79	445.58
13.33	39.39	1013.93	84.74	471.23
23.68	68.3	1017.93	84.16	438.65
17.69	46.36	1019.55	86.64	462.81
26.68	68.08	1011.41	67.33	433.04
6.97	41.26	1010.6	96.88	484.71
18.88	44.06	1013.81	68.54	451.13
13.25	44.92	1024.11	89.34	469.18
26.02	70.79	1004.21	79.12	428.72
26.86	71.32	1007.38	81.14	430.44
7.89	39.37	1016.28	84.66	483.82
3.21	38.44	1017.11	84.86	492.93
8.01	41.66	1014.49	76.72	485.13
24.4	69.94	1005.75	58.1	438.76
28.46	60.23	1010.2	63.38	439.88
19.79	51.19	1008.77	94.72	447.96
12.38	44.2	1020.23	81.5	467.04
20.67	57.5	1014.42	81.89	453.29
25.24	63.47	1011.3	66.21	442.75
13.35	41.44	1015.9	66.04	473.17
19.94	38.52	1018.4	55.9	450.48
27.52	67.9	1005.65	59.52	439.01
10.81	44.63	1020.61	88.29	473.86
10.03	41.79	1020.35	66.42	475.42
6.25	39.48	1004.82	52.71	484.26
15.63	37.87	1020.4	74.77	465.28
20.56	64.45	1012.24	53.09	458.97
16.72	44.78	1007.75	56.79	453.39
11.64	38.25	1013.33	85.79	472.34
9.99	42.07	1018.78	85.68	471.6
16.41	44.92	1024.27	84.16	462.12
13.42	41.74	1020.96	61.8	473.45
25.95	69.51	1009.36	66.82	434.38
8.87	41.82	1033.3	74.28	477.97
10.55	41.26	1007.77	99.1	473.6
30.17	75.08	1005.17	55.89	438.89
14.28	39.39	1013.82	77.52	469.92
30.98	69.82	1009.17	50.63	438.44
28.78	64.96	999.75	56.43	432.66
27.24	71.25	1000.5	86.28	430.94
21.45	69.94	1010.5	82.17	443.31
30.09	64.96	1001.29	56.04	430.3
29.25	72.99	1006.85	61.15	429.12
14.85	40.8	1025.38	53.29	471.78
29.73	67.25	1017.64	37.79	439.06
12.67	48.14	1017.41	83.63	463.68
9.26	41.66	1016.87	73.32	483.51
23.59	59.43	1009.96	65.8	440.61
19.54	50.66	1014.7	84.53	456.61
17.86	52.9	1015.71	67.99	457.42
24.89	64.27	1013.52	64.65	444.21
17.72	50.9	1012.02	85.55	456.4
12.25	44.85	1014.13	85.25	470.92
18.75	41.1	1001.97	59.6	458.31
23.43	63.94	1010.64	89.29	440.16
30.35	77.17	1009.55	63.62	432.75
26.56	52.3	1007.4	62.04	439.25
18.94	47.83	1005.18	78.59	455.19
21.77	42.23	1013.03	67.44	462.51
24.68	48.06	1013.83	54.97	447.96
14.4	41.26	1021.41	73.11	462.78
24.39	58.41	1013.65	80.93	445.39
27.25	73.03	1014.15	68.52	439.78
25.85	67.69	1007.7	70.14	434
25.51	64.27	1013.28	61.85	444.76
24.8	72.24	1011.58	83.61	435.25
7.65	41.01	1024.31	97.17	475.89
27.16	56.85	1012.07	39.05	437.4
30.24	68.24	1009.68	64.67	426.25
27.96	49.16	1004.8	35.64	442.49
18.13	60.1	1009.67	84.75	455.82
19.93	62.1	1019.94	76.41	450.57
26.63	74.16	1009.72	83.26	436.03
11.41	40.1	1014.27	91.17	476.81
28.62	59.14	1016.36	53.1	436.09
13.8	44.34	1019.43	66.74	468.8
8.34	40.96	1023.28	89.45	483.92
23.7	66.56	1002.07	85.19	436.94
24.7	58.82	1009.4	75.91	442.98
28.75	57.55	1004.77	57.55	435.33
17.84	52.08	1006.65	100.09	450.67
16.02	44.21	1020.97	85.64	462.51
26.31	77.95	1012.45	77.22	436.83
18.87	62.96	1020.55	82.87	455.22
12.66	41.2	1015.88	89.12	466.49
17.28	44.06	1018.15	66.93	462.05
16.23	43.69	1016.4	68.9	466.22
9.12	41.54	1018.61	79.26	482.95
8.77	42.49	1010.7	86.78	469.1
32.13	74.34	1003.34	56.39	436.3
7.97	39.04	1018.51	65.17	483.3
19.99	40.79	1003.15	87.55	455.28
22.39	59.04	1011.78	86.39	445.52
16.48	41.35	1005.61	89.07	465.64
14.45	43.34	1015.47	83.33	462.16
25.89	66.49	1013.08	63.16	434.67
11.85	42.07	1017.92	93.45	467.25
27.23	49.16	1004.03	40.8	443.78
26.96	72.86	1004.86	59.17	441.12
8.25	37.49	1009.02	81.09	480.38
18.19	66.54	1012.9	86.05	449.22
26.91	61.5	1009.47	55.26	436.84
26.53	65.18	1012.77	64.37	437.39
24.06	69.94	1005.47	60.46	436.88
27.23	63.9	1014.3	47.19	443.61
28.62	68.24	1010.15	69.31	428.08
28.27	66.56	1007.36	55.99	433.52
15.79	49.21	1015.08	75.8	457.7
25.42	73.21	1001.91	93.78	432.04
11.02	41.26	1020.69	92.13	471.93
22.44	58.16	1017.28	63.68	452.71
28.89	70.72	1009.36	70.33	433.02
24.79	67.83	1009.32	61.46	438.36
20.67	70.02	1010.42	94.09	448.75
15.22	41.35	1003.12	95.45	464.56
21.42	43.79	1015.76	43.08	462.19
25.3	71.29	1007.86	62.98	437.17
19.35	43.43	1009.4	66.11	454.02
14.47	39.58	1011.31	69.85	467.34
25.54	49.16	1003.64	47.4	443.55
8.53	40.02	1031.27	85.57	476.73
30.58	68.84	1011.34	51.29	439.71
7.79	41.16	1023.17	97.11	471.82
22.72	65.61	1014.64	70.53	449.04
24.62	72.43	1007.97	84.36	436.89
28.8	73.4	1011.34	54.01	439.65
20.3	58.46	1015.93	82.13	448.79
13.48	41.26	1021.92	78.24	466.88
19.97	50.78	1008.75	92.7	446.57
20.67	63.56	1013.27	79.39	450.7
20.45	58.96	1014.53	65.36	454.26
10.33	44.92	1025.34	85.67	476.99
23.24	63.76	1010.1	79.16	441.35
17.36	41.23	998.08	63.46	459.1
13.8	44.21	1022.93	83.37	468.97
31.13	64.05	1011.51	61.27	439.24
8.13	39.99	1011.71	87.89	486.19
16.64	45.87	1009.02	98.86	456.79
10.35	40.27	1005.09	92.42	477.8
24.72	68.67	1006.74	79.02	443.06
24.54	66.49	1011.1	69.14	437.38
11.69	39.22	1017.05	55.51	472.76
22.64	58.66	1011.68	60.97	449.79
15.81	54.3	1017.8	68.45	461.63
24.79	75.6	1017.07	68.23	440.05
18.67	44.06	1017.13	77.18	454.51
18.59	44.63	1003.99	86.22	459.65
20.55	65.46	1013.87	58.09	448.83
15.36	41.35	1002.4	91.67	465.01
7.67	42.85	1012.02	93.35	478.94
10.04	39.13	1011.26	88.91	474.61
22.63	58.96	1013.62	56.67	451.41
23.08	48.41	1008.44	82.35	443.5
13.63	43.22	1012.71	72.85	464.62
13.6	41.2	1015.92	85.05	467.42
26.94	59.87	1011.66	58.34	448.6
24.2	50.78	1008.74	59.32	443.09
26.45	64.27	1013.23	60.92	444.9
11.45	40.8	1027.74	78.6	476.28
30.5	66.75	1017.55	38.2	432.87
16.03	41.23	996.35	82.04	464.67
23.82	48.92	1010.48	44.45	446.85
11.95	41.58	1015.83	89.35	464.57
29.85	71.58	1010.04	58.66	432.26
26.59	66.49	1013.32	49.76	439.72
15.63	43.02	1012.57	40.32	466.69
9.96	41.26	1022.9	83.83	475.21
15.67	41.1	1004.1	77.93	466.45
23.08	61.86	1013.44	84.64	441.44
23.84	49.21	1013.85	50.36	447.09
14.77	44.9	1020.5	84.31	465.23
27.56	66.93	1016.81	55.59	444.1
13.78	43.22	1011.31	69.7	463.71
28.73	68.24	1008.31	56.85	430.63
22.59	60.32	1016.84	78.58	447.17
32.98	71.32	1003.67	49.78	433.56
9.31	43.56	1015.09	79.96	482.55
21.39	52.3	1009.2	79.77	446.87
29.35	69.04	1008.55	61.78	445.04
14.22	45.01	1014.17	70.14	464.06
11.68	40.55	1017.31	99.82	473.51
11.39	40.27	1009.04	73.13	474.93
22.72	58.82	1012.54	77.72	448.67
15.52	36.99	1006.86	89.7	467.9
24.87	65.75	1006.45	65.75	435.6
21.26	60.84	1018.43	78.83	446.08
29.79	77.17	1009.68	64	432.84
14.39	42.77	1017.36	83.28	463.65
20.21	60.84	1018.5	82.73	447.73
17.67	43.96	1011.68	82.13	466.31
6.67	39.37	1020.31	73.56	488.13
10.06	39.61	1020.69	69.49	478.35
29.48	64.69	1006.44	64.46	435.09
24.99	58.79	1016.37	67.16	439.2
14.22	44.99	1012	75.28	460.53
18.76	52.9	1016.27	64.7	458.26
24.82	66.54	1010	60.36	440.88
16.95	40.12	1012.59	87.87	457.05
10.54	34.03	1018.71	74	478.77
7.08	39.99	1010.55	91.44	482.83
14.49	41.16	1000.5	82.17	465.24
10.73	25.36	1009.35	100.15	469.43
22.88	63.91	1009.63	87.82	442.5
26.52	77.17	1008.71	92.32	432.48
31	77.95	1010.14	65.97	431.62
19.3	46.93	1014.83	66.71	456.62
28.56	74.22	1007.45	69.6	434.54
24.32	58.79	1016.8	65.61	442.78
10.8	39.28	1010.7	82.62	478.8
23.77	64.15	1021.02	55.87	448.43
27.61	69.68	1012.79	77.01	438.31
13.72	45.01	1014.07	77	464.59
13.93	40.24	1017.88	88.35	469.25
9.39	41.79	1021.6	50.09	473.73
20.35	68.61	1011.17	86.69	450.89
13.43	50.59	1020.38	86.3	469.33
28.31	64.79	1016.58	60.88	440.96
30.8	73.17	1010.51	51.93	432.24
14.04	39.64	1011.09	87.22	472.31
19.61	45.01	1014.84	64.42	461.97
12.35	41.38	1021.99	55.38	474.94
26.8	72.58	1009.22	89.03	431.18
24.03	45.87	1007.55	52.48	445.84
23.76	58.82	1011.75	77.34	444.57
22.31	70.32	1009.22	89.53	437.83
9.11	36.66	1026.47	74.79	480.74
27.16	59.87	1011.78	58.84	446.38
6.57	42.07	1004.48	74.82	483.86
22.56	66.48	1003.82	77.46	437.73
24.65	71.98	1006.46	91.11	431.77
28.96	66.54	1002.54	56.33	429.48
22.45	63.77	1014.57	87.44	444.26
20.73	41.1	1001.86	47.51	456.44
9.98	41.54	1019.7	80.79	480.26
7.14	44.71	1019.98	71.9	487.71
9.82	39.96	1024.72	97.69	471.96
21.89	63.94	1019.55	55.09	447.74
13.9	41.17	1016.84	72.9	468.96
14.09	43.99	1021.02	94.39	468.09
25.38	70.94	1007.87	73.59	446.31
23.85	74.22	1009.99	82.72	441.66
29.05	65.74	1013.29	60.02	440.74
11.48	37.5	1014.38	69.75	472.9
29.21	72.25	1012.72	71.85	434.64
14.21	39.16	1016.5	85.09	473.87
14.87	42.77	1017.94	75.06	462.03
15.07	40.69	1015.29	70.98	469.03
11.21	39.85	1013.01	75.55	480.61
22.28	59.92	1009.36	95.38	437.85
30.78	73.67	1005.97	58.7	427.15
13.4	40.89	1010.67	91.66	472.36
15.02	37.64	1016.49	83.28	463.93
15.47	43.13	1015.11	50.5	466.63
26.02	59.57	1011.16	76.93	446.5
13.53	40.71	1023.83	61.59	474.7
26.31	44.57	1007.51	52.6	452.73
23.97	68.67	1006.63	76.83	441.53
24.41	52.3	1006.28	70.33	442.62
22.37	50.78	1008.84	82.06	449.08
15.08	37.85	1009.85	85.9	465.58
25.15	66.49	1012.71	63.46	436
12.17	49.83	1008.05	96.44	469.52
13.69	40.1	1014.38	83.57	470.76
29.16	55.68	1004.84	55.68	435.04
28.88	73.68	1015.25	47.73	432.93
31.68	74.16	1011.3	55.94	434.61
23.96	65.34	1015.52	56.82	449.23
21.45	60.08	1017.92	72.7	451.49
18.76	58.79	1016.66	88.22	453.44
24.17	48.78	1018.08	75.14	440.96
25.16	43.21	1011.73	88.69	442.29
5.79	39.61	1021.64	85.41	489.6
14.93	39.39	1014.31	80.68	468.88
11.82	41.26	1020.74	91.14	466.95
9.96	41.55	1002.59	65.86	475.91
16.77	38.01	1023.04	65.5	460.16
21.47	65.61	1015.92	76.22	447.42
19.27	65.12	1015.63	73.48	449.42
31.74	72.25	1012.21	41.62	437.29
22.39	48.14	1014.56	64.31	448.58
32.98	73.88	1006.31	47.55	440.28
27.45	66.25	1009.3	77.58	437.37
19.44	60.07	1014.8	69.06	452.89
21.94	64.15	1021.2	61.75	453.3
14.65	39.28	1014.04	77.98	470.41
26.98	70.94	1007.99	68.16	434.73
12.36	48.04	1012.8	93.59	468.37
23.22	69.04	1009.65	89.05	448.6
32.81	77.17	1009.17	53.13	430.53
30.82	76.2	1007.47	59.3	432.22
29.17	73.17	1009.87	60.97	432.07
15.03	35.71	1015.26	56.55	467.61
13.61	41.74	1021.66	62.83	471.79
13.33	40.64	1020.92	91.47	474.07
18.88	40.79	1004.98	92.65	459.06
21.03	63.86	1014.84	71.72	450.64
28.66	50.05	1006.08	47.74	435.94
26.91	65.34	1014.19	50.7	443.6
24.63	59.57	1010.45	85.36	440.67
22.55	69.84	1006.57	76.29	438.54
19.61	56.53	1019.69	77.13	454.22
19.66	42.18	1001.51	95.75	454.46
14.78	41.17	1016.42	67.42	469.69
27.78	68.67	1005.59	59.17	439.92
32.45	66.44	1011.21	50.18	429.99
14.63	41.23	998.96	86.4	466.36
15.35	35.4	1016.3	57.12	468.94
18.28	44.71	1016.99	33.71	462.28
14.64	53.82	1016.33	60.59	463.18
19.65	63.91	1009.26	99.08	444.9
14.8	43.99	1022.89	85.25	461.97
11.59	40.05	1014.96	86.22	474.46
14.51	49.83	1006.27	91.65	460.45
21.7	64.69	1007.93	78.37	448.76
19.76	62.1	1020.07	73.55	450.44
20.13	47.03	1012.59	83.03	459.15
32.95	75.08	1005.32	47.7	436.3
15.58	40.66	1016.34	87.42	460.61
7.68	42.85	1012.51	91.51	479.16
20.45	59.8	1015.13	79.21	452.96
27.45	59.74	1011.34	58.58	450.46
27.13	59.54	1004.33	73.27	438.32
2.34	39.42	1028.47	69.68	490.34
31.11	72.25	1012.34	44.45	434.22
25.13	68.63	1013.57	43.44	446.36
13.69	43.22	1009.94	74.64	466.72
17.66	62.1	1019.49	86.3	452.03
9.98	41.62	1013.56	95.77	463.16
10.07	40.92	1021.84	84.18	471.71
32	71.85	1008.44	53.59	427.95
25.37	58.33	1013.49	51.42	444.46
28.85	68.12	1012.05	46.31	436.15
23.64	71.25	1004.92	93.87	442.26
27.12	70.32	1009.94	52.67	429.08
26.13	47.93	1002.81	66.19	441.28
12.14	40.83	1010.56	78.31	474.82
18.68	43.69	1016.68	48.88	463.02
11.74	43.56	1015.14	70.72	477.5
7.64	41.17	1020.01	75.14	488.53
17.88	45.87	1008.39	93.63	455.83
20.16	60.1	1011.24	86.23	453.36
23.92	71.98	1006.22	92.96	433.23
12.28	40.92	1023.23	89.14	460.33
26.43	51.43	1006.3	71.48	441.01
7.91	39.96	1023.57	88.44	475.52
21.31	69.05	1002.46	73.42	440.97
26.08	48.6	1003.61	57.8	438.61
26.87	74.99	1002.48	71.91	437.78
17.7	48.98	1015.79	83.18	454.41
14.6	42.32	1015.71	77.03	464.67
24.01	67.17	1007.44	86.87	443.09
24.24	71.58	1010.15	91.14	437.75
34.3	74.67	1015.98	25.89	427.84
17.55	48.78	1016.81	91.27	455.11
26.54	71.14	1007.52	72.04	431.31
22.71	48.06	1012.82	67.81	445.1
13.08	42.32	1016.63	83.72	462.41
10.17	41.46	1020.01	84.86	482.36
13.61	40.71	1022.36	72.87	475.23
13.43	40.1	1015.82	87.9	471.77
9.49	40.69	1015.09	91.31	476.67
19.11	44.85	1014.76	45.86	464.66
21.8	51.3	1012.07	89.51	450.25
21.38	65.12	1015.73	68.02	448.5
7.64	40.02	1031.58	71.19	479.43
26.75	60.96	1012.05	56.77	447.93
31.87	68.67	1005.64	48.85	435.66
25.44	66.54	1011.9	56.76	437.99
20.1	57.17	1011.96	87.68	452.67
13.93	44.47	1025.35	81.54	469.25
31.75	74.99	1003.25	53.33	430.82
10.31	44.63	1020.55	88.62	471.78
16.52	42.24	1017.51	67.65	469.13
19.82	46.63	1013.17	87.1	456.36
13.22	40.83	1007.82	92.72	472.72
15.16	40.73	1017.7	86.37	459.19
15.5	40.12	1012.79	96.75	460.41
9.06	39.3	1019.73	84.23	480.41
18.61	44.06	1016.91	75.01	452.68
25.09	65.38	1009.99	54.28	453.58
14.01	38.91	1015.86	69.24	470.1
4	39.9	1009.64	97.16	490.79
24.54	72.24	1011.43	74.1	435.08
25.21	59.21	1017.37	55.06	445.33
25.37	68.31	1011.12	70.99	441.76
29.77	69.98	1013.32	69.6	430.65
13.04	45.09	1013	87.68	467.44
22.18	65.46	1016.74	54.02	447.92
25.04	70.36	1006.56	75.91	436.47
24.14	41.1	1002.1	38.49	450.13
16.97	44.92	1025.21	74.27	460.21
30.93	70.83	1010.61	46.13	440.59
21.14	67.71	1006.38	56.78	445.12
16.34	47.45	1009.41	92.96	448.59
27.1	79.74	1005.43	86.05	431.51
28.47	67.69	1004.79	56.51	430.67
23.75	61.5	1008.16	69.14	442.35
14.7	40.8	1025.78	50.96	472.85
21.49	70.32	1009.07	92.25	443.04
23.99	45.87	1007.63	52.62	443.66
14.28	44.84	1024.84	79.09	474.57
25.65	68.08	1011.27	75.26	435.91
15.22	41.67	1013.18	67.17	469.93
30.72	69.13	1009.94	61.66	435.83
11.74	40.6	1013.91	90.57	473.84
16.09	50.59	1015.69	84.41	463.64
7.07	37.49	1010.35	87.19	481.58
7.36	41.01	1024.9	97.88	476.8
29.25	71.94	1007.18	63.62	427.49
9.33	44.03	1011.73	86.04	474.15
19.72	46.21	1010.54	77.74	449.33
16.44	53.82	1015.4	63.16	462.09
20.95	70.72	1009.96	87.73	445.66
25.5	58.79	1016.02	64.4	440.01
18.31	42.23	1012.88	79.32	464.45
14.02	40.75	1016.05	70.65	470.48
9.27	38.56	1017.69	62.49	475.42
27.89	70.94	1007.54	49.18	435.21
31.18	69.04	1008.19	49.72	441.26
26.49	78.92	1010.82	83.42	434.91
27.59	50.05	1005.71	57.03	437.98
13.96	40.83	1009.89	84.86	469.86
15.24	37.87	1020.52	84.49	463.09
24.89	66.49	1010.15	65.65	436.39
7.99	36.08	1020.08	83.2	481.35
25.71	52.84	1006.32	53.29	445.54
15.92	39.16	1006.59	71.32	460.45
11.75	71.14	1019.36	75.68	466.56
15.86	40.66	1016.23	86.74	455.85
9.52	41.26	1020.55	89.73	475.44
12.29	40.03	1017.62	89.64	472.65
21.34	59.8	1016.92	77.06	450.74
17.3	47.45	1010.29	87.13	448.79
22.63	58.49	1010.94	72.7	448.38
20.76	62.52	1015.63	81.04	451.69
5.11	42.07	1004.28	81.8	486.41
7.77	40.27	1010.25	83.65	485.54
15.24	39.39	1013.01	74.24	469.79
17.26	49.78	1007.38	100.06	453.54
27.41	74.67	1016.57	80.16	429.21
16.39	58.59	1014.58	90.34	455.05
14.79	39.54	1007.25	82.54	469.23
26.22	67.45	1013.7	44.04	440.17
16.29	53.82	1014.97	73.15	459.95
29.83	62.66	1007.98	47.07	438.71
32.84	74.67	1015.89	31.81	430.88
24.18	66.48	1004	64.86	434.5
23.25	71.29	1008.05	71.36	442.21
5.21	43.65	1017.64	78.62	486.08
15.78	48.6	1007.24	84.23	460.86
14.52	40.35	1011.11	69.84	470.8
27.96	77.24	1007.23	78.51	433.35
19.78	44.71	1015.7	29.43	465.49
14.12	39.4	1008.02	76.45	468.63
12.03	41.58	1015.09	90.43	464.02
13.45	45.87	1008.73	87.06	464.88
13.65	41.58	1020.56	72.17	460.8
28.14	65.34	1014.44	46.17	443.11
19.62	52.05	1012.09	50.02	456.81
15.55	40.66	1016.21	88.5	457.53
22.95	67.79	1009.89	91.69	442.19
11.11	40.55	1023.91	87.12	476.37
6.85	37.49	1011.01	84.53	483.12
24.44	59.21	1017.36	61.45	445.82
19.65	45.01	1014.18	56.77	451.63
29.25	67.32	1013.88	38.57	437.94
24.74	59.39	1015.23	74.64	437.49
15.3	43.34	1013.23	82.73	463.7
11.05	40.71	1024.91	76.42	479.59
22.48	50.05	1005.55	82.36	442.56
27.2	65.12	1016.2	44.95	442.54
24.73	69.94	1006.09	59.15	439.86
9.55	41.44	1015.07	85.94	481.75
24.96	60.84	1018.13	59.51	442.36
20.68	63.86	1015.73	74.36	447.84
17.46	39.99	1008.52	69.73	461.01
22.83	58.62	1017.82	69.76	450.96
7.71	40.71	1021.53	95.48	471.38
30.69	73.67	1006.14	60.58	430.45
7.49	39.81	1019.03	87.29	483.59
25.26	61.08	1013.68	71.72	447.46
6.09	43.65	1020.95	71.15	485.96
26.82	64.96	999.72	63.55	427.51
21.52	46.21	1010.62	67.62	449.08
19.11	60.29	1017.1	76.62	454.16
18.34	62.1	1020.52	78.6	453.01
14.11	45.08	1023.27	83.22	464.7
4.96	39.4	1003.58	92.22	486.09
11.27	40.69	1014.35	86.63	476.27
23.04	57.32	1011.23	64.27	442.01
26.63	73.68	1015.15	85.13	428.8
11.72	40.35	1012.08	83.98	476.41
11.76	41.58	1020.91	88.35	465.45
30.65	65.18	1012.51	42.32	436.79
23.13	71.25	1002.49	94.59	431.91
12.93	38.73	1006.41	89.24	471.3
13.42	40.35	1011.2	77	472.57
26.5	66.05	1017.03	61.34	440.15
16	37.87	1020.24	78.41	461.33
15.02	41.48	1015.19	58.69	456.04
11.57	44.63	1020.7	91.11	469.64
11.82	42.86	1014.12	88.28	476.7
30.15	69.88	1007.2	73.67	434.75
23.19	58.82	1009.96	81.05	446.44
17.33	53.16	1013.77	82.77	459.78
12.24	41.2	1012.48	89.85	473.22
25.42	75.6	1017.39	77.63	438.24
31.35	71.32	1005.99	62.35	434.43
13.86	50.59	1019.2	97.22	467.23
16.24	41.93	1021.66	44.91	467.69
24.43	65.18	1012.57	77.83	437.26
20.28	68.63	1012.42	70.31	454.36
9.72	41.44	1015.17	84.41	481.85
22.98	73.17	1011.94	90.13	438.5
29.23	68.14	1004.31	81.46	428.87
27.94	63.07	1010.75	38.57	441
23.14	58.95	1017.52	66.25	442.27
25.33	71.32	1007.05	85.31	434.68
20.31	49.69	1011.57	69.03	455.37
28.59	80.18	1011.36	89.18	431.55
31.23	68.67	1005.82	52.1	436.58
19.68	56.65	1020.75	67.25	456.89
19.83	46.33	1013.27	96.4	451.22
33.97	72.29	1008.98	44.32	432.33
12.72	40.6	1013.45	86.16	471.23
7.77	35.77	1016.53	73.79	479.68
22.72	63.73	1012.63	82.14	448.56
31.25	69.51	1010.25	36.83	428.77
23.2	48.41	1008.64	80.92	444.69
19.65	62.1	1019.46	77.82	449.13
32.11	78.05	1010.36	58.78	431.31
25.08	51.43	1011.8	71.98	446.67
6.42	35.57	1025.58	79.63	485.86
9.88	40	1021.4	92.06	481.58
18.62	59.15	1012.85	82.54	450.81
18.22	39.63	1005.11	79	465.78
26.65	66.48	1005.7	65.09	436.65
6.22	39.85	1012.05	86.88	443.73
10.29	41.74	1019.9	80.51	480.62
5.97	40.35	1012.3	94.1	489.03
27.51	71.29	1009.43	76.92	430.42
29.86	59.57	1011.24	64.02	439.44
22.12	49.39	1019.8	72.83	451
13.42	42.86	1013.88	85.13	473.27
7.67	41.66	1016.25	77	485.03
29.72	68.08	1010.72	53.46	430.36
21.98	58.79	1010.72	86.85	448.84
10.8	41.39	1019.74	74.08	478.75
12.19	41.17	1019.43	65.47	475.64
24.54	60.23	1011.55	72.78	445.25
10.42	44.85	1014.18	88.36	479.03
23.63	60.37	1005	81.66	440.74
14.89	39.58	1012.26	77.58	465.95
23.68	49.02	1007.53	86.05	440.68
12.57	43.8	1023.2	56.85	466.68
26.34	69.45	1013.87	54.15	438.5
23.2	61.02	1009.63	79.45	443.23
26.04	72.43	1006.82	84.88	432.94
11.48	37.92	1008.47	70.55	472.9
28.42	73.4	1011.39	62.72	438.25
27.49	63.78	1015.43	47.45	445.66
23.66	60.37	1006.91	87.13	438.59
33.2	73.88	1005.67	48.48	438.12
13.94	47.83	1004.83	81.2	465.13
10.24	41.58	1021.17	94.34	465.86
27.54	75.6	1018.26	57.89	440.87
21.98	55.5	1017.89	57.9	457.29
29.69	47.93	1002.85	44.76	438.09
13.97	53.82	1016.81	62.32	465.24
21.41	59.43	1010.27	74.54	442.85
15.48	44.99	1011.94	69.95	463.92
26.76	49.02	1007.96	70.05	439.4
22.01	60.84	1017.55	83.82	441.9
23.77	59.21	1011.97	80.08	440.08
15.29	41.35	1006.32	82.56	466.27
25.72	72.39	1003.01	86.38	432.77
22.2	59.21	1017.87	73.34	445.29
30.96	69.82	1009.6	51.55	438.74
26.26	73.06	1009.35	91.65	435.41
29.71	73.18	1012.35	63.06	427.04
8.77	40.77	1011.54	89.58	480.56
22.24	69.23	1011.83	79.37	441.9
18.51	50.9	1012.95	82.71	459.11
19.29	67.71	1007.94	63.71	449.28
11.54	40.05	1014.78	87.05	474.29
13.79	42.07	1018.27	88.06	462.25
30.21	71.32	1006.19	67.57	434.91
20.89	67.71	1006.12	59.12	445.39
1.81	39.42	1026.92	76.97	490.55
5.04	40.64	1021.35	93.63	484.42
8.75	40.22	1008.96	90.53	482.8
21.5	44.58	1016.87	57.58	460.2
28.86	73.18	1012.46	68.8	427.01
20.74	58.12	1015.43	77.88	449.91
25.24	57.17	1010.44	74	442.77
26.01	61.47	1009.54	75.01	435.78
9.41	41.54	1019.48	82.19	481.59
25.24	68.28	1000.26	78.17	435.9
20.21	59.14	1016	70.38	448.79
25.87	63.47	1011.54	65.45	445.87
22.32	59.8	1016.82	64.18	451.21
23.64	60.95	1014.92	64.91	447.86
23.07	65.27	1013.24	58.38	443.42
23.47	59.22	1013.44	83.33	442.13
9.3	40.56	1022.64	76.14	479.87
19.8	58.79	1017.04	87.71	449.66
10.2	41.62	1016.52	98.09	462.87
16.05	41.96	1011.82	96.05	463.72
26.93	72.99	1007.33	78.85	433.18
19.58	50.12	1009.82	100.1	449.44
10.95	39.22	1015.69	62.3	474.07
13.67	38.53	1009.3	81.85	470.39
13.86	41.78	1010.75	57.9	467.39
28.9	71.25	1000.73	77.24	431.52
13.94	44.84	1023.69	95.3	468.06
16.25	40.89	1011.09	62.7	464.33
15.62	40.12	1013.03	96.26	462.59
25.07	77.95	1012.87	83	438.55
19.41	64.45	1009.44	64.05	452.55
26.63	74.22	1007.44	78.5	434.25
6.58	40.67	1020.18	71.07	494.84
13.19	39.18	1023.67	66.78	469.62
20.15	65.59	1014.62	79.39	449.84
13.35	41.39	1019.17	72.87	474.19
27.99	66.91	1008.47	59.63	439.74
20.25	57.76	1016.28	77.76	452.66
18.99	56.65	1020.46	77.16	457.55
8.51	41.26	1023.17	87.79	477.51
29.45	70.02	1010.28	65.93	437.82
19.95	57.25	1011.08	88.04	453.03
8.58	40.72	1022.04	87.55	480.96
28.9	68.12	1011.87	46.56	438.53
28.71	71.64	1005.21	71.11	432.05
27.16	65.61	1014.21	47.93	441.33
9.38	40.46	1019.29	75.77	474.1
13.9	45.08	1023.29	83.43	465.31
10.2	40.67	1016.15	73.2	482.26
27.57	69.84	1004.91	68.37	426.6
13.86	40.66	1017.15	83.82	463.49
12.24	44.92	1023.74	88.21	473.26
2.64	39.64	1011.02	85.24	481.29
17.14	41.66	1010.97	57.66	463.38
9.48	44.71	1019.12	66.43	478.42
15.18	43.67	1011.59	92.58	467.74
22.74	58.12	1015.16	79.58	447.86
23.66	67.17	1007.24	87.56	443.43
19.09	42.44	1012.93	63.59	461.84
20.98	60.07	1016.26	67.18	446.26
13.88	39.16	1010.8	75.69	464.37
16.34	42.28	1008.08	52.8	463.29
16.82	47.45	1010.19	88.48	449.57
20.47	63.07	1012.79	88.67	451.71
24.84	56.89	1012.15	67.24	440.36
25.45	57.32	1011.7	47.09	441.3
14.71	44	1024.98	85.08	462.87
18.58	64.45	1009.68	67.57	444.28
8.27	39.64	1011	84.64	479.91
14.56	47.45	1009.52	91.14	451.95
9.76	41.01	1019.66	97.59	467.6
28.13	61.25	1013.12	62.57	436.61
15.74	43.71	1024.7	78.38	462.66
20.56	59.14	1016.02	68.59	448.82
22.26	69.04	1010.48	84.33	444.73
18.23	45.01	1012.24	73.86	454.06
24.35	58.79	1010.13	72.1	448.19
20.72	68.61	1011.25	87.1	447.89
25.78	47.93	1003.67	67.23	442.46
11.64	41.44	1016.4	73.18	478.99
21.71	65.27	1013.24	63.58	444.91
6.99	35.19	1019.32	68.95	480.05
27.38	70.04	1011.18	72.26	428.88
27.7	72.24	1011.02	67.6	434.56
23.84	49.21	1013.6	47.63	447.03
31.26	68.94	1005.94	39.49	438.03
12.48	39.85	1012.93	60.23	477.17
30.67	72.86	1004.25	52.72	432.76
26.02	71.94	1009.38	64.12	435.21
24.19	68.94	1007.37	70.83	439.52
23.05	68.67	1006.69	76.43	447.34
29.15	73.42	1011.43	66.49	432.26
20.12	56.53	1020.34	75.59	454.54
13.43	43.69	1016.21	73.01	475.36
22.7	66.44	1011.19	68.36	444.02
9.93	41.62	1013.76	96.02	464.64
21.18	60.1	1011.02	78.19	452.39
13.86	35.71	1015.21	63.16	471.63
26.88	69.51	1012.76	45.03	436.3
13.38	40.12	1013.92	96.96	468.15
18.55	43.69	1016.84	47.95	465.2
6.03	41.14	1028.04	87.46	479.61
13.18	40.03	1017.75	82.29	470.88
31.24	72.39	999.47	68.17	430.7
15.99	43.5	1021.34	73.22	460.7
30.44	68.84	1010.97	55.34	438.31
18.9	58.46	1016.74	87.65	449.32
17.82	49.15	1020.73	70.25	457.35
31.13	67.45	1015.02	41.34	435.14
19.53	66.54	1013.72	81.46	451.19
24.03	58.46	1015.71	70.15	442.03
22.59	65.06	1014.36	62.44	444.6
26.13	79.74	1005.61	90.27	431.29
25.02	60.77	1016.71	69.85	441.21
25.95	59.27	1010.9	70.42	444.19
15.14	39.72	1002.96	72.52	460.15
20.99	67.07	1005.17	82.41	442.02
9.89	40.64	1020.59	98.35	478.13
29.01	70.04	1010.02	57.35	430.26
30.53	73.21	1000.37	74.17	430.2
8.51	38.5	1013.33	64.28	482.39
13.53	42.86	1014	90.63	471.73
19.18	65.06	1015.99	77.06	448.26
25.99	71.32	1007.17	83.23	432.41
20.6	60.08	1017.84	75.92	454.39
10.02	52.75	1021.93	73.68	473.09
14.22	42.32	1015.54	77.23	465
25.64	70.72	1010.16	84	441.68
7.57	37.49	1009.73	83.07	481.98
17.67	50.88	1015.64	90.55	456.16
21.96	58.79	1012.1	88.74	447.31
14.28	42.74	1028.79	70.67	467.22
23.46	59.27	1010.6	79.79	445.57
34.61	73.03	1013.61	36.91	438.56
10.98	41.39	1017.54	85.31	476.31
12.55	38.91	1012.58	75.44	474.35
19.85	56.53	1020.57	74.05	457.17
7.77	41.82	1032.72	72.8	479.4
24.38	63.91	1009.53	79.11	446.02
8.64	39.69	1001.57	98.27	473.55
29.12	51.43	1005.93	60.66	437.71
14.19	49.83	1006.52	90.72	462.86
24.19	46.21	1010.79	62.04	440.87
12.99	41.93	1020.25	74.64	472.95
25.52	71.98	1006.89	86.94	433.42
28.88	66.56	1006.26	59.15	426.66
24.23	58.79	1009.8	75.75	444.01
25.1	71.77	1004.34	82.8	429.7
32.1	69.98	1013.31	55.84	431.09
26.16	70.04	1009.63	73.22	432.56
9.04	40.11	1023.3	76.32	473.57
7.5	40.02	1031.39	82.53	476.01
12.21	40.64	1020.31	83.84	464.03
26.36	54.5	1015.35	66.87	451.81
13.5	45.51	1015.33	86.95	469.08
26.38	65.12	1016.1	47.57	441.07
27.71	66.93	1016.85	58.77	447.06
12.6	40.35	1011.89	80.88	475.42
22.05	61.27	1019.6	58.83	447.95
15.61	38.52	1018.4	80.99	439.21
19.66	59.87	1018.75	87.6	446.28
30.2	69.59	1008.9	67.32	434.66
26.21	56.85	1011.45	41.37	439.55
9.34	40.77	1012.14	90.81	477.36
8.79	40.67	1019.5	66.3	489.02
24.9	71.77	1006.24	85.25	427.77
30.51	60.75	1009.86	51	435.57
16.81	38.52	1018.26	75.21	459.01
13.49	41.78	1010.66	63.34	467.92
7.24	41.17	1020.35	80.56	486.76
13.25	34.03	1018.94	72.1	470.46
10.94	40.81	1026.03	80.79	476.32
14.62	42.86	1015.56	84.5	470.79
21.19	67.71	1006.65	56.28	441.71
26.14	61.02	1010.13	66.71	436.17
17.94	63.07	1012.42	94.35	456.7
10.53	37.5	1008.55	99.91	472.32
20.92	70.02	1010.23	95.58	444.64
29.45	64.96	1005.52	59.92	433.04
17.06	52.9	1019.76	80.9	460.82
22.29	56.89	1014.39	84.89	441.9
10.64	41.04	1025	93.59	468.88
27.34	71.64	1008.12	72.22	438.76
16.56	42.99	1007.48	74.45	464.62
27.52	74.67	1015.77	72.01	433.56
8.68	43.14	1011.94	79.06	480.73
27.73	67.69	1007.47	59.42	431.72
18.84	61.27	1019.64	71.95	454.47
11.26	44.92	1023.63	88.99	474.69
22.92	61.9	1013.27	78.32	446.08
21.09	46.63	1013.03	74.8	453.34
12.17	40.6	1013.59	88.62	473.76
24.26	61.02	1009.78	76.68	442.86
24.12	58.66	1011.55	58.96	450.69
6.1	43.65	1018.07	75.85	485.24
6.3	39.33	1010.63	94.26	489.95
24.37	68.14	1005.22	59.27	440.22
20.3	58.41	1014.05	86.38	451.74
24.94	59.07	1008.89	84.79	440.12
31.41	76.09	1007.68	70.49	430.81
28.9	71.94	1007.29	64.77	427.41
31.58	66.54	1003.26	54	429.73
35.2	73.56	1006.56	45.72	434.37
20.62	68.12	1012.33	79.88	447.16
11.98	39.35	1014.97	98.05	472.43
22.17	65.61	1014.71	70.91	449.91
25.54	48.41	1010.51	55.34	437.58
9.75	42.49	1010.57	83.63	480.35
12.4	40.35	1011.46	79.49	476.44
23.74	49.21	1012.78	42.5	447.67
21.11	43.43	1010.1	62.62	447.83
8.61	41.04	1024.81	95.6	473.62
13.83	45.08	1024.2	80.52	465.5
30.97	74.22	1007.93	49.74	431.58
28.55	69.84	1003.38	67.26	432.7
27.03	65.12	1015.94	45.1	441.62
11.97	42.32	1016.95	88.32	467.98
15.15	53.82	1016.34	62.59	461.6
7.78	39.18	1024.62	85.15	484.65
15.73	38.73	1002.48	76.91	466.63
31.99	53.53	1004.98	53.53	432.43
32.49	71.32	1005.03	57.12	433.59
10.61	41.58	1021.08	93.06	465.15
26.18	68.08	1012.92	55.7	436.51
13.78	39.85	1012.7	71.99	474.9
24.8	66.51	1016.74	65.72	441.34
5.35	35.57	1027.12	80.81	488.65
10.61	37.5	1008.8	100.13	472.9
14.29	39.59	1012.36	92.38	463.13
14.24	41.4	1019.7	70.32	466.88
8.94	42.07	1018.9	85.93	473.34
5.57	42.85	1013.55	92.14	488.85
32.55	69.89	1013.87	40.09	428.84
23.95	58.46	1017.5	68.46	440.75
24.16	65.06	1013.88	58.96	442.32
11.7	43.41	1016.08	62.27	467.51
14.93	43.02	1012.11	45.56	468.19
30.61	77.17	1009.49	73.19	430.46
15.79	49.15	1020.62	76.22	465.62
14.55	41.7	1018.58	80.8	454.14
21.14	58.05	1012.98	87.27	449.74
8.23	40.77	1011.92	90.59	479.24
20.86	51.3	1012.03	92.46	449.67
3.73	39.42	1024.4	82.42	488.58
10.82	37.5	1009.23	96.62	473.9
31.12	68.14	1003.67	67.36	427.06
19.05	59.21	1017.99	89.53	451
29.93	71.85	1008.43	66.64	426.82
29.72	71.97	1008.6	79.25	431.22
10.06	39.61	1018.22	70.22	471.86
25.44	75.23	1010.71	66.44	436.67
31.91	67.83	1008.76	53.22	425.28
11.63	40.55	1022.89	87.12	474.67
20.3	62.52	1017.96	75.17	451.86
29.47	71.32	1008.07	67	437.14
21.97	65.61	1016.09	73.29	447.05
29.23	74.22	1008.49	57.88	428.9
21.84	59.39	1015.77	88.12	442.11
8.64	38.56	1016.51	66.03	484.45
20.65	57.5	1016.04	87.45	448.22
31.16	69.88	1007.01	68.28	433.24
13.32	44.9	1007.72	78.64	466.3
15.25	52.9	1014.86	76.87	463.93
17.51	68.28	1004.36	94.87	449.59
12.68	45.01	1013.86	83.26	448.69
24.48	66.25	1009.42	88.17	441.07
16.12	45.87	1008.15	86.12	457.41
20.48	39.72	1001.61	57.32	455.58
27.02	71.77	1006.38	72.1	428.1
27.34	63.78	1016.5	48.4	446.56
13.5	41.44	1015.72	68.36	471.34
28.62	70.32	1008.87	46.67	431.03
20.66	41.54	1014.68	79.7	461.55
4.71	39.42	1026.4	84.42	481.28
26.34	68.67	1006.54	72.48	437.52
9.56	44.71	1021.13	64.6	487.92
23.09	70.47	1010.76	79.89	439.36
11.35	40.73	1019.37	96.05	472.32
24.01	60.84	1018.83	63.82	436.32
8.36	40.67	1014.99	73.65	489.1
22.2	51.19	1009.2	82.95	445.54
15.67	45.17	1018.73	94.74	462.09
28.14	76.86	1000.7	70.17	434.68
21.55	44.57	1006.03	71.54	446.84
18.53	63.91	1010.26	97.8	440.64
17.16	58.86	1016.4	86.39	453.76
15.27	41.16	1009	84.12	467.01
13.62	42.34	1017.87	89.67	464.79
30.12	74.16	1013.13	63.56	433.08
24.82	74.87	1010.28	73.54	434.46
27.25	69.98	1008.55	59.55	431.44
22.07	58.95	1017.98	75.83	442.4
23.85	72.43	1008.01	88.34	439.02
31.1	68.51	1012.99	54.3	428.68
19.13	59.21	1018.32	89.66	450.81
31.33	65.18	1011.97	36.62	435.77
26.34	59.21	1013.37	58.98	439.22
10.33	40.69	1014.25	84.46	480.18
15.39	42.28	1007.35	81.35	467.3
6.65	40.69	1020.11	89.84	479.35
12.95	41.38	1021.97	53.83	474.46
11.6	39.96	1011.65	80.79	473.22
14.38	44.84	1024.59	81.68	471.6
8.39	36.3	1015.39	62.23	479.57
9.44	44.03	1009.59	86.27	473.61
24.34	73.5	1011.31	84.15	440.29
6.44	39.33	1011.8	93.5	490.57
29.27	64.69	1006.85	55.79	438.23
17.11	49.78	1007.25	100.09	453.22
12.29	42.18	1016.53	83.13	468.75
5.45	39.04	1020.07	77.05	487.33
28.07	64.09	1005.41	64.09	436.61
19.3	65.59	1014.07	81.98	452.76
28.61	69.84	1004.24	67.74	429.91
25.31	61.5	1009.31	63.31	437.03
4.62	38.44	1016.09	73.14	486.84
14.39	44.85	1014.19	75.16	465.88
5.84	40.62	1018.58	82.73	482.1
31.49	73.5	1010.71	40.16	432.13
26	70.47	1009.61	74.66	435.05
21.23	68.08	1012.82	74.57	445.41
32.15	72.29	1010.13	50.19	435.71
17.23	41.1	1002.45	68.88	464.18
35.56	68.94	1006.56	38.75	429.69
14.46	44.78	1007.64	67.03	459.31
16.88	38.58	1014.72	73.99	462.7
16.01	43.69	1017.12	62.43	465.89
24.54	44.89	1010.05	59.13	445.11
26.82	69.05	1004.62	40	437.42
32.16	66.25	1008.17	56.88	434.5
24.85	68.37	1006.5	68.37	442.66
13.91	44.58	1021.36	78.98	472.67
11.5	40.78	1023.91	86.31	467.74
25.86	59.07	1008.59	81.28	440.9
13.76	45.08	1023.77	80.48	469.74
8.16	39.72	1020.54	82.11	480.21
20.34	46.63	1013.16	79.08	453.62
17.29	44.06	1016.24	77.56	461.38
10.45	40	1019.01	89.01	465.43
31.12	67.69	1005.3	50.46	425.21
18.36	53.16	1013.14	79.89	457.94
24.98	58.05	1011.69	69.97	447.15
9.97	39.99	1010.09	95	477.31
30.66	66.25	1007.67	63.03	439.55
28.52	70.02	1010.34	54.21	441.98
9.45	41.4	1027.06	87.35	479
21.94	58.79	1010.3	88.21	447.52
23.86	74.93	1016.88	71.44	444.38
13.35	39.64	1010.1	93.3	471.69
8.84	42.49	1010.28	89.09	481.58
24.49	68.61	1010.56	64.03	447.57
20.61	63.86	1015.43	73.86	446.34
25.6	71.73	1010.15	68.99	436.7
22.18	62.91	1012.14	68.86	449.77
18.01	62.26	1011.89	89.29	451.14
9.05	40	1015.48	80.91	472.41
24.48	69.13	1002.88	69.43	432.71
10.73	40.35	1012.27	89.65	477.23
24.29	63.57	1010.29	87.3	443.28
18.94	48.7	1007.82	92.88	453.36
7.62	44.71	1020.56	69.96	486.07
29.3	74.16	1007.72	81.92	431.32
9.28	41.38	1021.96	72.22	486.18
21.17	58.16	1017.16	68.11	452.02
10.52	42.18	1014.9	95.67	469.03
14.62	44.84	1023.41	85.17	464.51
10.61	43.79	1016.03	76.33	480.28
18.32	65.94	1012.74	86.77	450.5
5.78	45.87	1012.65	88.8	483.27
30.37	67.45	1015.35	45.6	431.38
18.94	46.93	1010.22	75.45	441.41
24.77	58.41	1013.78	80.57	446.27
15.25	43.02	1012.04	41.43	467.23
5.28	45.87	1008.25	97.88	479.91
24.18	58.49	1011.3	77.82	445.49
19.27	43.14	1013.17	39.85	463.14
22.71	75.23	1010.48	76.86	444
25.03	57.5	1014.96	62.23	449.48
20.96	69.48	1011.04	82.63	444.31
26.1	62.91	1012.44	60.91	446.05
10.31	45.01	1018.42	93.67	473.74
20.55	48.98	1016.1	63.89	452.52
24.44	69.84	1005.34	80.37	430.3
16.49	49.39	1018.1	93.13	461.54
10.28	39.64	1010.45	74.15	477.65
15.95	49.25	1019.04	88.51	463.4
15.48	41.66	1009.55	66.74	467.06
19.69	56.65	1020.79	66.94	457.17
25.72	66.86	1007.47	69.14	439.97
27.4	69.13	1001.4	82.47	426.18
10.03	42.02	998.6	99.9	471.07
14.39	44.84	1023.55	91.14	464.15
21.01	50.9	1012.24	70.82	453.99
10.12	40	1021.15	91.67	479.62
22.89	74.78	1009.79	81.57	443.7
14.53	39	1016.48	76.36	464.86
17.78	52.08	1006.9	100.09	453.31
29.07	71.64	1006.07	69.53	440.51
13.05	44.34	1018.47	81.2	473.4
31.74	67.32	1013.69	36.59	436.17
12.25	41.38	1021.81	59	474.77
13.48	40.73	1017.59	94.81	463.6
11.8	43.22	1008.57	78.01	469.55
20.82	57.76	1019.15	72.46	454.62
17.4	63.09	1020.84	92.58	453
10.84	40.62	1015.53	60.9	467.6
18.87	44.06	1013.42	68.78	451.4
24.86	60.77	1016.85	71.24	440.68
9.61	44.03	1008.3	91.36	473.54
16.52	43.7	1015.08	58.36	466.73
14.91	40.73	1017.44	86.91	458.99
28.32	68.12	1011.62	46.75	433.59
11.44	40.55	1023.37	88.43	477.68
19.22	62.1	1019.43	79.19	451.8
27.07	77.95	1012.34	76.64	433.61
15.84	49.69	1015.14	90.41	462.6
28.75	64.84	1009.61	58.24	441.3
12.87	39.3	1020.64	74.38	467.54
26.05	58.59	1012.32	49.83	452.41
23.97	62.44	1013.64	88.5	442.46
19.94	58.96	1014.16	66.27	455.55
21.81	60.27	1015.93	91.38	441.85
16.71	42.99	1007.72	75.35	465.09
11.74	40.71	1020.64	82.15	470.05
19.31	44.71	1016.13	30.59	463
8.85	40.43	1025.68	80.42	491.81
19.78	63.09	1019.01	78.39	448.34
10.59	37.5	1013.14	81.56	471.38
21.97	58.95	1017.78	76.95	443.61
31.3	67.17	1007.27	62.99	433.53
22.75	58.86	1016	67.34	448.32
10.58	42.34	1022.32	94.01	474.91
24.3	69.94	1007.02	62.14	438.92
12.39	44.58	1016.38	84.95	475.37
32.31	62.04	1010.41	39.39	450.13
14.1	39.16	1008.19	74.05	464.07
22.16	64.63	1020.81	68.47	451.86
16.69	46.18	1010.8	96.8	466.03
15.56	41.1	1004.65	84.58	467.32
27.23	71.77	1006.59	77.94	427.39
31.86	69.59	1008.61	59.74	435.72
31.56	66.44	1008.91	64.16	430.11
12.52	40.24	1020.45	97.41	470.56
34.96	68.94	1006.17	59.26	431.48
10.57	41.26	1008.32	97.96	472.9
11.2	35.76	1019.24	64.59	473.33
23.93	68.28	1005.16	69.91	444.95
10.52	41.01	1020.35	93.58	466.75
22.04	59.14	1017.34	84.75	442.45
30.2	70.02	1009.85	63.39	437.48
28.56	69.51	1012.45	46.59	434.35
18.48	52.05	1012.41	68.2	458.62
30.69	71.98	1004.53	65.86	430.33
26.67	70.94	1007.7	56.56	439.13
9.88	39.66	1017.81	76.05	480.05
10.75	40.81	1015.93	79.27	474.71
9.2	39.82	1013.19	91.25	482.89
31.01	67.83	1007.95	43.57	429.46
11.05	40.75	1016.55	87.08	478.07
20.13	40.33	1005.31	85.42	460.09
20.95	44.89	1010.48	67.97	450.39
8.88	36.66	1026.61	76.16	480.2
24.45	68.63	1013.38	45.35	446.33
22.76	49.21	1014.35	48.85	448.73
10.36	37.83	1005.87	98.56	472.62
11.16	40.05	1014.95	88.38	479.11
25.38	74.67	1016.61	81.34	435.41
17.35	52.72	1026.31	58.01	463.65
24.56	51.86	1014.43	68.85	447.57
26.41	68.24	1010.6	77.79	428.52
26.12	49.02	1008.63	72.04	438.52
6.64	39.04	1018.84	74.94	481.53
8.25	43.14	1011.3	87.1	479.95
21.04	69.48	1011.07	89.92	439.53
29.75	74.87	1009.1	56.5	435.61
30.72	71.58	1009.98	50.39	430.46
25.98	60.95	1014.5	48.01	442.9
10.67	45	1022.99	85.91	481.83
13.74	34.03	1018.69	67.34	470.49
11.46	38.91	1012.34	77.37	477.5
14.04	48.79	1017.62	75.25	464.09
22.64	62.44	1011.82	75.07	448.13
20.94	49.02	1008.91	87.32	448.18
20	39.53	1007.59	62.09	456.28
13.21	43.71	1024.5	86.59	466.39
18.63	48.92	1011.37	71.72	450.29
14.78	42.86	1015.32	84.75	471.17
25.47	56.89	1013.02	63.21	440.38
26.39	66.05	1018.24	61.27	442.22
28.95	66.75	1018.22	60.48	432.39
27.33	52.84	1005.88	56.16	438.97
13.83	44.45	1021.5	68.75	462.6
26.81	56.57	1013.68	61.6	442.94
11.86	40.55	1019.82	91.45	473.31
4.24	39.9	1009.28	96.74	491.25
27.66	76.86	1001.31	69.47	436.64
26.31	63.77	1014.15	69.36	440.1
22.22	66.05	1016.15	80.58	442.95
23.15	69.48	1011.07	85.83	436.16
24.31	65.94	1011.5	61.61	442.69
17.01	49.15	1021.83	84.02	458.78
13.63	43.5	1022.12	84.32	468.28
12.88	40.64	1020.76	92.58	474.58
6.74	36.08	1020.36	86.98	484.18
16.05	43.14	1010.67	79.36	463.06
19.89	44.9	1008.12	67.3	453.09
11.15	40.64	1020.65	97.95	477.79
20.85	59.21	1012.9	75.97	444.44
12.43	40.27	1007.08	61.56	470.92
25.97	70.32	1007.48	57.01	435.27
14.95	42.99	1008.75	90.76	468.61
10.22	45.01	1018.27	93.62	474.32
13.93	40.2	1013.41	89.86	466.47
30.97	67.9	1005.98	55.6	428.26
15.55	43.02	1011.97	44.66	466.2
20.42	45.01	1012.23	66.5	451.28
6.77	39.81	1017.01	87.68	488.27
16.26	44.89	1010.48	86.57	456.86
20.5	49.69	1009.6	70.81	452.94
28.84	73.03	1013.99	76.05	435.75
15.31	40.66	1016.46	84.64	458.26
22.69	58.46	1017.74	75.21	443.47
5.68	40.35	1012.11	92.86	486.79
15	41.35	1006.6	86.95	467.71
30.76	73.17	1009.89	50.43	430.98
22.06	64.15	1021.07	68.66	451.44
28.29	68.67	1005.46	69.22	436.4
10.92	40.92	1021.84	83.03	467.05
11.67	41.93	1019.81	82.58	476.1
25.23	69.34	1009.51	82.87	445.92
11.82	41.54	1019.96	67.65	476.97
29.84	74.87	1009.64	61.39	435.05
8.33	38.08	1018.94	73.78	481.89
23.28	69.51	1013.31	53	444.17
31.25	68.94	1005.99	49.61	434.51
14.82	40	1016.32	66.3	458.46
28.94	68.67	1005.39	75.24	434.65
15.54	41.96	1011.78	97.46	467.1
9.92	40.64	1020.39	95.41	469.65
20.61	60.1	1010.84	80.57	450.46
14.22	37.85	1011.24	88.49	471.05
7.82	40.72	1022.17	88.13	481.52
11.31	42.02	1001.18	94.86	471.26
10.72	41.17	1019.68	60.71	479.21
28.35	70.32	1009.22	47.13	427.21
24.78	66.49	1010.55	68.12	436.62
34.18	78.05	1010.71	66.77	432.1
5.85	40.77	1022.44	84.77	480.59
26.9	77.95	1017.47	75.58	434.18
10.3	41.46	1018.21	86.17	479.65
21.47	60.77	1018.06	85.73	444.02
18.37	51.86	1018.8	74.3	461.14
11.43	40.22	1010.84	81.04	477.5
5.15	40.78	1025.34	95.84	483.03
25.35	74.33	1015.29	77.84	435.66
25.38	63.87	1018.7	52.48	442.13
26.14	72.99	1007.49	81.72	433.25
11.1	40	1021.29	86.58	477.2
16.7	50.66	1014.86	94.87	457.74
26.3	51.43	1012.05	63.62	442.28
16.82	49.15	1020.68	72.07	462.22
10.96	37.5	1013.46	79.54	471.05
12.2	39.72	1018.07	54.83	471.33
23.09	73.5	1011.4	89.76	438.56
13	39.28	1016.7	81.94	473.6
13.75	44.47	1029.63	70.74	467.14
23.78	69.71	1008.79	83.17	443.06
23.96	47.43	1008.38	63.55	446.86
23.66	62.08	1022.42	64.13	447.06
18.32	42.18	1002.27	95.99	458.46
11.21	41.06	1021.75	77	474.03
14.66	41.76	1022.12	78.13	463.6
17.53	50.66	1012.74	91.51	457.28
20.34	59.8	1015.18	80.21	453.54
29.95	67.25	1017.68	51.91	433.13
15.78	43.99	1022.19	83.7	461.07
24.28	71.98	1006.34	90.45	432.47
16.73	65.94	1013.79	90.19	453.39
14.26	42.86	1011.33	88.37	471.19
25.21	59.21	1013.19	62.85	438.7
12.5	43.67	1013.99	90.91	473.26
9.83	38.56	1017.35	62.8	480.47
21.96	69.94	1011.09	80.27	441.15
27.19	62.91	1011.57	53.66	444.8
21.61	58.62	1017.61	76.07	449.11
19.35	39.39	1013.91	61.53	465.28
13.16	54.3	1017.33	82.43	468.4
26.88	74.78	1010.42	64.81	440.84
15.37	41.96	1011.58	96.76	466.02
18.16	39.99	1007.73	70.54	463.69
17.7	50.88	1015.44	89.57	456.78
11.94	44.2	1017.97	82.93	474.02
13.33	38.47	1015.42	58.27	466.26
18.92	46.93	1009.89	77.98	453.66
24.96	70.47	1007.73	76.48	438.23
28.19	68.08	1013.41	43.93	436.43
13.31	41.26	1020.83	79.55	462.87
14.5	53.82	1016.81	62.89	464.27
27.64	75.6	1017.35	54.78	441.04
20.51	48.6	1005.29	80.7	448
12.87	41.5	1013.51	85.72	469.44
27.11	70.04	1009.76	71.25	431.96
7.17	41.92	1031.97	83.86	485.08
25.13	59.44	1012.38	77.92	445.59
23.21	74.22	1009.68	88.46	440.46
9.11	40.64	1020.68	86.91	476.62
5.52	42.85	1012.77	93.82	478.98
10.17	40.1	1014.05	91.9	479.58
26.38	69.88	1008.42	86.25	432.25
[truncated: 7,569 more rows]

## Sheet: Sheet3
AT	V	AP	RH	PE
9.44	40	1015.62	81.16	471.32
23.49	49.3	1003.35	77.96	442.76
4.99	39.04	1020.45	78.89	472.52
18.24	58.46	1017.38	86.92	449.63
27.49	63.78	1015.43	47.45	445.66
13.61	41.16	1020.49	75.09	462.67
29.75	73.5	1011.13	67.31	433.63
27.38	77.24	1008.25	82.49	435.81
18.28	60.1	1009.72	85.79	452.93
23.74	62.96	1019.65	63.39	449.48
7.78	40.8	1026.7	85.61	488.54
19.72	46.21	1010.54	77.74	449.33
23.18	72.99	1009.01	90.09	439.12
18.5	52.08	1006.23	100.09	451.23
14.39	42.77	1017.36	83.28	463.65
29.56	52.84	1006.09	42.17	436.46
8.4	38.5	1013.67	69.13	486.5
25.47	60.75	1007.27	65.91	438.42
15.23	44.9	1007.75	81.34	456.07
12.78	44.6	1013.64	77.56	468.67
10.16	41.62	1013.15	94.3	465.05
9.83	41.17	1019.34	72.29	478.21
26.72	56.9	1007.12	58.54	435.16
9.41	34.69	1027.02	78.91	480.87
8.51	40.81	1015.54	83.16	481.02
11.39	40.27	1009.04	73.13	474.93
28.44	69.4	1003.98	73.51	433.44
12.74	41.38	1021.92	56.67	475.63
24.99	58.79	1016.37	67.16	439.2
22.1	65.94	1009.79	67.57	443.95
14.38	44.84	1024.59	81.68	471.6
10.59	41.46	1016.87	85.7	480.83
16.22	41.35	1000.96	79.59	462.21
17.52	44.05	1008.87	85.67	455.72
25.35	72.99	1007.65	84.09	436.29
15.14	37.85	1010.33	84.3	468.31
19.78	54.42	1011.74	89.34	456.84
28.14	76.86	1000.7	70.17	434.68
8.07	41.01	1023.26	97.5	474.09
21.91	63.76	1009.85	76.8	445.04
7.41	39.16	1015.23	90.66	486.91
16.14	44.71	1014.83	39.41	468.88
13.83	39.64	1012.52	69.97	472.95
22.75	58.79	1011.44	84.47	445.67
30.06	67.25	1017.63	53.59	435.02
19.78	50.32	1008.62	96.4	449.23
25.06	65.46	1014.37	38.82	443.03
32.41	72.86	1003.69	58.04	432.75
12.82	48.14	1017.47	81.45	467.48
28.43	69.59	1008.79	73.33	439.26
14.72	40.83	1009.65	80.98	469.8
23.71	67.17	1007.27	90.2	440.65
23.76	74.22	1009.2	92.98	437.47
9.78	43.8	1022.25	69.64	477.22
8.87	41.82	1033.3	74.28	477.97
31.84	71.37	1003.51	46.22	432.04
23.59	58.62	1017.81	66.68	448.09
29.51	75.6	1017.92	50.61	431.18
30.16	73.17	1010.74	58.99	434.43
12.28	40.92	1023.23	89.14	460.33
12.83	44.88	1017.86	87.88	474.26
30.1	47.93	1002.64	42.06	435.27
15.52	43.7	1015.8	76.27	466.38
10.06	39.61	1020.87	74.01	476.92
18.5	47.03	1013.97	93.6	460.08
31.33	76.86	997.85	64.43	431.44
30.28	79.74	1006.96	70.21	433.45
19.27	50.9	1011.72	83.14	455.09
17.23	40.12	1013.52	81.55	456.2
20.73	69.94	1009.9	82.12	445.91
22.31	43.43	1010.64	56.44	449.67
19.7	52.84	1004.86	89.72	444.64
19.02	50.66	1013.04	85.25	455.42
5.15	40.07	1012.27	63.31	495.35
8.6	40.77	1011.8	89.45	480.82
27.75	77.24	1007.48	78.37	433.57
21.37	65.94	1010.73	75.09	444.74
22.87	71.29	1008.1	73.1	442.27
6.1	43.65	1018.07	75.85	485.24
14.33	42.86	1010.82	88.59	469.52
22.18	45.09	1014.04	43.13	455.4
19.2	58.71	1009.8	84.62	448.17
15.43	40.89	1010.63	73.03	468.35
20.03	47.45	1009.04	77.56	450.6
23.42	50.05	1006.79	86.45	441.8
7.61	44.71	1019.41	70.48	485.36
10.44	39.04	1023.99	85.03	480.34
17.79	46.21	1010.38	85.25	448.74
26.85	69.84	1002.84	81.31	426.58
24.54	48.41	1008.61	73.53	439.79
24.64	72.24	1011.37	80.61	434.54
27.06	43.77	1011.02	42.61	442.15
25.76	71.06	1007.93	90.4	433.75
21.1	62.66	1011.19	83.49	448.8
27.45	64.34	1007.12	65.87	440
25.1	43.77	1010.9	49.68	444.99
23.16	69.94	1004.92	68.68	438.48
18.84	67.32	1012.63	81.89	449.21
25.92	50.16	1003.95	71.3	440.98
28.75	64.84	1009.61	58.24	441.3
23.81	73.17	1012.13	86.13	438.11
11.03	42.32	1017.26	90.56	470.92
28.06	70.04	1009.89	66.07	431.7
13.35	41.39	1019.17	72.87	474.19
11.44	41.39	1019.59	79.95	478.52
12.34	40.62	1016.28	53.6	466.47
32.12	69.98	1013.31	54.3	429.86
8.66	44.68	1022.99	95.45	479.62
5.37	40.07	1012.75	63.58	494.21
23.92	71.98	1006.22	92.96	433.23
26.8	72.58	1008.94	78.24	428.62
23.82	64.15	1020.96	60.11	447.37
7.79	42.03	1017.74	91.48	477.26
20.94	68.12	1012.43	78.2	446.41
10.87	44.71	1021.38	58.22	484.63
30.69	74.16	1012.71	60.89	435.17
25.33	48.6	1002.54	68.45	442.48
9.45	36.71	1024.24	83.28	476.02
17.45	49.64	1026.4	66.67	454.67
28.99	54.2	1012.79	41.9	442.6
9.23	37.36	1015.01	67.38	481.08
22.69	48.14	1013.7	62.05	448.52
22.79	50.78	1008.65	58.39	447.12
25.56	75.6	1017.37	69.31	442.2
15.91	71.14	1019.7	72.65	458.15
22.91	66.44	1011.23	63.43	444.48
19.94	38.52	1018.4	55.9	450.48
24.04	60.77	1017.62	75.23	442.25
20.11	50.78	1008.73	93.24	447.42
8.73	41.92	1029.41	89.72	480.99
16.19	36.99	1007.37	92.4	462.94
27.66	59.21	1013.12	51.58	438.57
6.93	41.14	1027.18	84.67	479.06
22.05	48.14	1015.81	69.94	447.37
14.05	40.71	1016.36	68.58	465.74
9.75	52.72	1026.03	78.53	473.41
10.22	37.83	1005.94	93.53	471.79
20.84	51.19	1008.63	84.11	448.98
21.04	69.48	1011.07	89.92	439.53
25.6	73.67	1005.78	84.82	433.25
12.75	44.03	1007.29	89.46	465.86
19.3	56.65	1020.55	70.43	459.1
16.68	53.16	1014.32	78.02	456.29
6.05	38.68	1017.46	66.13	483.5
31.91	69.89	1014.59	54.51	429.29
23.3	48.78	1018.17	75.36	441.08
23.71	50.23	1017.55	73.24	458.59
4.99	41.03	1022.33	83.11	493.16
30.09	69.48	1009.51	53.24	435.2
23.95	73.67	1007.32	87.67	437.43
15.69	44.6	1014.06	61.51	462.07
20.85	48.7	1007.11	87.2	449.57
10.2	40.67	1016.15	73.2	482.26
14.01	43.34	1016.95	83.41	463.81
21.67	62.39	1007.98	92.96	445.85
22.76	49.21	1014.35	48.85	448.73
28.48	54.2	1013.14	49.51	440.55
16.13	39.99	1007.04	80.49	465.25
9.18	39.42	1025.41	69.46	473.78
10.1	41.79	1019.36	78.07	474.09
20.98	47.43	1007.39	68.15	450
15.97	45.01	1016.58	83.24	456.91
30.02	69.04	1009.68	56.01	440.49
17.49	63.94	1020.02	82.6	452.71
32.56	68.14	1004.02	35.04	425.11
14.72	43.34	1013.07	85.61	464.22
30.55	66.25	1009.15	63.52	440.74
20.5	49.69	1009.6	70.81	452.94
20.08	63.09	1019	77.06	448.74
24.48	69.45	1013.86	62.39	435.74
19.35	43.43	1009.4	66.11	454.02
17.84	61.27	1020.1	70.68	454.57
19.07	44.63	1020.23	44.93	456.37
26.48	66.54	1011.61	51.9	438.87
15.69	39.3	1019.03	60.57	464.17
6.99	35.19	1019.32	68.95	480.05
23.29	49.3	1003.88	74.12	442.11
28.9	68.84	1011.64	64.44	437.06
22.82	60.08	1017.95	65.71	450.86
10.89	40.81	1025.82	81.18	478.23
18.12	63.09	1019.32	89.21	449.65
8.9	39.96	1026.31	95.46	474.49
20.1	59.87	1018.97	87.23	444.71
22.4	58.12	1015.24	78.03	449.13
6.69	43.65	1020.14	69.55	482.57
5.02	40.64	1021.2	93.27	485.28
28.82	65.71	1014.24	54.3	449.18
15.12	39.16	1006.55	76.99	463.78
24.64	58.79	1009.82	73.96	444.26
24.19	65.48	1018.8	60.54	443.92
11.17	39.72	1002.4	81.4	474.64
17.53	42.24	1016.9	60.95	470.63
20	39.53	1007.59	62.09	456.28
21.38	65.12	1015.73	68.02	448.5
33.83	67.9	1005.94	29.86	428.12
31.46	71.8	1010.75	54.88	434.96
13.07	40.83	1010	84.84	471.19
24.43	58.2	1017.18	46.84	444.89
22.93	58.2	1017.75	54.09	444.95
27.65	67.07	1005.65	60.42	439.03
18.77	52.08	1004.02	99.86	449.62
19.36	44.6	1016.25	45.65	464.56
12.54	41.62	1010.86	83.42	461.08
17.06	52.9	1019.76	80.9	460.82
21.83	41.1	1001.91	41.79	453.38
30.04	67.25	1017.57	38.14	434.83
29.01	66.44	1011.21	71.56	430.61
27.44	66.56	1005.51	69.28	428
17.69	46.36	1019.55	86.64	462.81
14.64	39.31	1008.84	79.3	462.72
15.74	43.71	1024.7	78.38	462.66
22.04	69.51	1013.25	56.15	446.34
19.02	52.72	1025.44	51.9	461.57
26.29	56.85	1012.68	60.33	439.86
7.46	41.82	1032.67	74.59	483.11
28.82	77.24	1008.35	78.93	433.69
20.27	56.65	1020.75	67.12	454.29
17.73	40.55	1003.36	74.62	462.69
14.76	49.64	1026.31	75.67	461.16
24.49	65.46	1015.77	44.95	445.27
25.97	70.32	1007.48	57.01	435.27
16.02	39.54	1007.73	72.81	466.15
13.03	39.52	1016.68	83.09	473.99
21.87	66.86	1013.01	57.39	453.62
28.01	65.34	1014.68	46.86	440.77
29.53	64.44	1013.22	59.75	440.1
14.19	39.52	1018.34	77.25	467.14
8.27	35.77	1015.3	73.36	478.13
28.72	76.86	999.31	71.74	431.74
31.68	74.16	1011.3	55.94	434.61
8.22	40.77	1009.11	95.61	480.38
14.02	41.78	1011.26	48.62	465.87
5.71	40.77	1022.51	89.58	485.75
21.87	61.45	1011.13	92.22	445.21
22.07	48.41	1008.71	81.29	444.01
23.97	63.86	1018.09	57.62	441.65
19.08	44.63	1020.05	41.07	455.95
30.51	59.57	1011.08	61.94	436.92
22.88	69.45	1014.02	65.13	441.76
28.2	66.75	1018.35	60.18	433.46
16	37.87	1020.24	78.41	461.33
22.82	69.94	1004.65	73.47	437.32
9.99	43.52	1022.95	99.67	473.64
21.53	70.02	1010.33	95.95	440.93
31.98	64.05	1010.49	58.01	439.56
28.07	68.08	1013.13	44.67	437.65
27.45	59.74	1011.34	58.58	450.46
23.07	57.5	1015.7	75.47	447.49
27.21	64.05	1010.08	76.69	442.37
29.15	73.42	1011.43	66.49	432.26
24.99	60.37	1005.66	74.87	437.67
20.15	39.72	1001.85	59.32	456.87
17.09	42.42	1009.03	72.01	464.11
9.47	41.4	1026.49	87.9	479.68
19.04	50.12	1010.53	100.09	446.59
25.44	65.06	1013.82	55.72	440.09
22.32	70.47	1010.97	83.16	441.87
11.47	40.27	1005.39	77.4	479.44
18.77	49.39	1021.06	82.95	454.53
13.76	45.87	1008.89	87.27	463.5
27.46	67.69	1004.7	70.15	432.64
27.88	70.79	1005.06	72.5	429.62
25.87	47.01	1014.67	61.87	452.32
15.09	40.89	1010.15	92	466.47
10.2	41.17	1019.56	82.46	479.7
19.12	50.16	1011.52	99.71	451.49
28.19	68.08	1013.41	43.93	436.43
10.9	41.93	1014.96	96.24	477.93
20.76	44.58	1017.09	57.47	462.01
33.3	80.18	1011.09	63.98	430.16
10.96	37.5	1013.46	79.54	471.05
28.28	56.9	1006.38	64.99	445.61
18.55	41.1	1002.02	65.16	459.97
27.03	65.12	1015.94	45.1	441.62
8.7	36.24	1013.34	89.5	478.69
24.94	67.69	1008.86	68.97	439.08
25.54	60.37	1006.49	71.54	436.14
8.86	40.23	1017.57	90.47	478.05
11.6	40.96	1023.95	86.83	473.66
3.63	38.44	1016.16	87.38	487.87
23.27	68.28	1005.01	74.83	444.86
9.46	36.66	1026.22	72.58	479.06
9.27	38.56	1017.69	62.49	475.42
20.95	48.14	1013.3	67.72	452.38
18.42	63.94	1020.47	74.47	450.55
7.35	41.66	1015.55	79.67	485.35
14.04	39.64	1011.09	87.22	472.31
5.76	45.87	1010.83	95.79	481.4
28.15	71.94	1006.73	68.21	427.69
32.69	72.86	1003.57	56.84	431.76
7.9	40	1018.74	79.55	474.5
25.86	76.2	1005.73	69.35	438.75
10.07	44.68	1023.44	90.95	477.52
25.28	72.39	1002.28	89.43	432.52
13.16	43.71	1024.44	85.68	469.06
14.57	39.28	1015.1	76.94	469.27
22.43	55.97	1008.97	85.98	443.74
13.35	41.44	1015.9	66.04	473.17
15.25	39.16	1016.18	79.39	471.05
13.55	43.48	1016.08	67.25	464.33
26.78	73.06	1007.99	90.47	433.25
24.15	63.13	1013.8	92.1	440.15
20.36	56.53	1020.25	72.96	455.34
20.27	63.56	1014.24	86.55	446.93
27.32	76.09	1007.77	74.64	443.13
15.59	45.09	1013.41	91.97	457.54
13.21	45.87	1008.58	85.66	463.1
32.74	68.31	1010.23	41.29	441.66
15.9	41.35	1005.35	92.89	464.93
11.08	38.16	1014.45	74.99	473.32
19.65	44.89	1009.76	75.36	451.35
27.76	65.59	1010.8	67.29	439.03
17.86	50.88	1015.59	88.28	457.33
14.46	44.78	1007.64	67.03	459.31
18.06	56.65	1020.2	81.59	459.14
27.3	57.19	1008.08	63.48	438.65
14.12	39.4	1008.02	76.45	468.63
20.25	59.8	1015.3	82.69	453.81
26.27	62.91	1011.97	48.06	447.76
14.17	42.86	1030.94	66.47	466.2
14.17	43.13	1014.94	48.62	471.08
15.43	39.16	1016.44	79.8	470.74
23.14	58.18	1008.89	81.82	444.51
12.38	41.62	1012.37	84.15	461.07
17.25	43.14	1018.34	76.17	462.8
21.73	64.63	1020.84	68.9	450.36
21.38	49.21	1012.49	53.77	449.66
13.5	54.3	1016.2	77.46	468.92
19.7	54.42	1011.83	89.86	450.48
15.29	25.88	1009.21	66	464.25
29.24	69.05	1003.12	43.18	432.56
17.77	56.53	1019.57	79.89	457.94
26.57	73.21	1002.31	92.51	431.68
22.69	49.21	1012.64	46.83	449.01
15.78	41.48	1015.55	52.17	454.25
32.87	70.8	1009.54	59.85	433.1
20.79	57.32	1012.47	70.09	446.18
29.77	69.98	1013.32	69.6	430.65
7.32	41.22	1015.42	97.25	484.21
27.76	44.89	1009.4	50.15	442.83
31.93	70.4	1005.27	73.71	432.29
7.69	38.06	1020.72	83.47	483.54
18.87	44.06	1013.42	68.78	451.4
13.05	44.34	1018.47	81.2	473.4
19.27	50.12	1007.61	100.11	447.63
5.98	41.31	1001.66	89.5	484.51
28.82	64.79	1016.74	56.34	445.1
30.05	56.9	1007.02	41.96	437.55
25.9	48.92	1009.82	35.42	443.8
24.86	60.77	1016.85	71.24	440.68
20.56	43.79	1015.85	45.7	462.11
11.94	44.2	1017.97	82.93	474.02
15.79	49.15	1020.62	76.22	465.62
13.51	40.1	1014.29	86.34	470.65
19.3	44.9	1008.89	70.55	452.75
7.69	43.02	1014.51	85.23	486.46
7.11	40.77	1022.4	90.95	475.55
25.51	67.69	1004.53	80.03	433.02
13.83	42.86	1030.77	75.09	470.21
13.95	38.73	1003.87	83.94	468.21
27.58	57.19	1007.88	52.95	435.7
19.99	65.94	1012.28	75.42	447.22
24.9	67.25	1017.77	66.17	433.71
14.22	45.01	1014.17	70.14	464.06
27.51	49.3	1003.74	61.27	437.09
23.79	48.06	1012.92	60.03	447.59
28.61	72.29	1011.61	45.33	446.77
26.3	51.43	1012.05	63.62	442.28
29.32	71.29	1008.34	51.51	432.17
24.12	51.43	1006.55	83.77	441.49
8.57	41.17	1020.18	72.47	484.2
18.96	50.16	1010.72	100.09	451.2
20.6	59.15	1013.32	91.07	443.76
26.48	68.14	1004.83	55.96	432.19
7.68	38.06	1020.92	83.87	483.8
24.56	63.21	1013.79	82.38	444.34
19.05	62.96	1020.48	83.04	454.26
15.1	41.35	1003.84	97.89	466.14
33.13	74.34	999.57	48.34	433.73
31.68	68.24	1005.29	37.34	427.22
20.45	48.41	1010.81	86.7	444.69
18.89	63.09	1018.47	84.85	450
21.96	59.8	1016.72	72.6	452.48
33.38	71.06	1008.1	64.83	430.98
8.66	40.11	1032.86	75.31	479.76
16.32	43.5	1021.3	72.6	460.07
26.7	66.56	1005.31	71.97	430.21
16.64	48.92	1011.55	78.76	452.56
15.09	44.34	1019.46	60.49	468.8
27.61	69.68	1012.79	77.01	438.31
22.28	59.92	1009.36	95.38	437.85
12.78	41.04	1025.16	85.14	461.61
26.23	59.07	1008.2	78.93	440.18
20.58	50.9	1011.89	72.56	452.6
31.07	70.32	1011.74	65.91	436.16
24.24	68.3	1018.03	81.51	437.12
30.36	68.08	1010.76	51.32	429.97
16.68	43.14	1018.39	76.48	459.83
7	39.81	1017.47	87.65	484.51
21.58	63.87	1015.27	63.15	451.88
5.72	40.81	1025.78	92.46	487.8
14.94	42.77	1018.06	75.35	460.51
20.03	60.77	1017.23	87.82	449.31
9.12	41.54	1018.61	79.26	482.95
14.46	53.82	1016.55	68.11	462.6
26.91	70.02	1010.75	59.48	445.31
26.51	67.25	1017.85	64.17	435.52
30.07	70.98	1007.74	75.68	437.55
20.57	63.78	1016.76	74	449.93
22.52	67.32	1011.4	66.2	443.49
25.99	71.32	1007.17	83.23	432.41
23.35	47.01	1015.03	73.9	456.3
30.7	74.22	1008.12	50.39	432.51
14.3	53.82	1016.64	63.9	465.42
27.54	66.93	1017.06	55.2	450.22
24.75	69.89	1015.29	82.01	438.1
13.56	40.03	1017.73	83.76	472.59
25.45	74.33	1015.53	80.95	435.12
29.13	47.93	1002.5	49.1	435.61
23.29	68.51	1013.19	77.81	441.17
5.07	40.07	1019.32	66.17	494.87
7.24	41.17	1020.35	80.56	486.76
11.38	39.22	1018.62	57.14	473.71
23.47	51.3	1011.89	74.1	448.65
9.82	41.04	1026.72	77.28	473.98
23.07	50.05	1006.9	86.98	442.97
22.61	42.8	1014.24	69.71	460.26
29.86	70.8	1010.22	70.36	437.47
26.64	73.56	1004.98	93.31	432.93
29.92	57.19	1008.62	45.8	438.99
15.86	39.82	1013.12	77.37	466.89
13.26	41.74	1021.89	63.32	473.44
9.8	41.82	1032.98	67.55	473.72
30.31	77.24	1008.02	67.84	435.28
13.1	49.83	1007.29	92.79	466.08
27.05	59.15	1012.83	56.31	441.39
11.52	39.18	1023.43	83.29	474.35
14.4	42.18	1015.47	77.7	464.81
23.43	61.47	1007.84	87.11	448.01
17.67	50.88	1015.64	90.55	456.16
25.88	71.73	1010.01	72.8	430.86
5.18	40.27	1010.84	81.64	489.1
6.75	39.9	1008.3	87.42	484.05
27.18	59.27	1012.57	64.18	439.69
10.9	40.67	1016.66	65.09	482.4
8.69	41.04	1026.87	80.28	477.2
14.97	43.67	1011.13	87.33	465.54
6.49	35.57	1025.4	79.67	486.8
29.12	51.43	1005.93	60.66	437.71
16	45.09	1014.31	60.02	458.46
18.56	42.18	1001.46	99.59	456.61
8.52	41.55	1002.09	86.81	483.63
23.62	61.87	1010.07	48.77	447.93
27.9	63.13	1011.8	70.04	439.76
27.24	68.08	1013.23	51.96	445.25
26.1	66.25	1009.25	84.52	441.53
12.99	40.55	1007.52	94.15	472.18
23.63	71.29	1008.01	70.07	442.65
31.31	67.48	1009.71	57.06	440.38
13.08	44.9	1020.47	86.46	472.01
25.59	73.5	1011.19	81.52	435.48
26.49	59.44	1012.09	57.84	441.16
28.13	68.12	1012.6	44.71	435.85
15.34	41.96	1012.08	100.12	468.33
25.16	43.21	1011.73	88.69	442.29
9.55	40.72	1023.12	68.06	481.08
18.94	48.7	1008.5	94.83	451.38
24.06	58.98	1010.66	81.16	443.75
21.65	58.18	1008.33	95.28	441.05
13.25	49.83	1008.76	88.21	453.8
29.6	71.58	1010.34	52.56	434.64
27.35	77.95	1017.43	73.36	437.61
17.29	42.86	1014.38	72.3	464.27
30.91	76.2	1008.53	58.08	434.94
7.77	41.82	1032.72	72.8	479.4
14.55	41.7	1018.58	80.8	454.14
6.31	42.07	1004.61	77.74	483.27
22.93	63.13	1011.6	77.09	448.02
12.53	44.03	1007.21	84.2	470.04
18.2	39.63	1005.35	79.05	468.49
20.04	58.2	1017.56	74.31	448.92
30.75	71.25	1000.07	65.47	431.93
17.7	43.69	1016.98	61.98	462.63
21.32	45.01	1012.23	59.94	452.75
28.41	66.91	1008.22	57.93	440.52
12.2	39.72	1018.07	54.83	471.33
17.88	46.97	1013.73	67.78	456.77
20.02	67.32	1012.05	76.34	445.31
22.1	74.87	1009.4	85.78	442.83
24.97	58.95	1017.19	56.24	440.03
21.01	60.1	1010.93	78.6	450.99
5.57	42.85	1013.55	92.14	488.85
25.86	61.08	1013.51	67.5	449.67
21.04	54.2	1012.26	85.61	443.41
19.07	49.69	1007.22	76.79	453.09
26.06	67.83	1009.26	66.37	432.28
19.22	62.1	1019.43	79.19	451.8
22.25	66.54	1004.64	89.15	437.19
26.39	49.16	1005.68	56.18	442.87
22.7	61.41	1012.08	78.08	449.75
17.58	44.9	1020.52	71.48	459.78
15.36	41.35	1002.4	91.67	465.01
14.22	40.83	1009.2	81.32	469.75
27.47	63.78	1016.07	48.47	446.69
27.14	65.27	1013.26	55.17	441.68
20.1	58.95	1018.46	80.87	446.7
24.82	72.99	1007.81	84.72	435.68
15.21	52.75	1024.32	61.11	458.84
25.18	65.06	1013.64	55.77	440.27
9.93	40.67	1018.08	69.74	485.23
21.79	60.93	1006.44	87.68	443.01
26.28	75.23	1011.44	68.35	435.28
25.73	62.66	1010.15	54.66	444.85
9.27	42.02	1004.29	95.05	474.93
10.23	42.32	1017.53	89.93	473.59
15.28	43.71	1024.32	81.24	463.44
18.01	62.26	1011.89	89.29	451.14
10.27	42.34	1022.69	92.78	474.55
22.58	43.79	1015.66	44.18	460.3
24.58	56.9	1007.08	68.24	437.16
19.13	40.79	1004.47	91.7	457.83
35.01	74.67	1016.1	26.3	428.48
29.78	65.74	1012.13	44.96	441.51
30.69	73.67	1006.14	60.58	430.45
18.26	58.96	1014.04	69.7	457.43
25.74	65.38	1009.6	54.34	452.94
26.9	69.59	1008.9	85.08	434.1
26.68	49.02	1008.4	68.01	441.54
21.8	65.94	1012.02	63.52	448.66
28.57	51.43	1012.02	47.79	450.04
10.25	41.46	1018.67	84.41	479.28
28.28	69.48	1008.56	61.3	428.75
7.3	39.72	1020.85	77.83	485.1
27.71	54.2	1012.72	47.25	440.74
10.2	41.46	1019.12	83.26	480.11
14.49	42.86	1013.94	88.2	468.4
26.42	71.06	1008.12	87.32	435.6
8.47	42.02	1005.37	92.73	477.67
5.74	37.8	1021.37	74.47	490.81
20.91	59.14	1017.25	74.7	442.67
22.66	68.3	1017.73	86.92	431.27
7.54	40.72	1023.82	85.15	485.92
14.2	43.02	1012.18	57.07	470.67
27.44	74.9	1003.85	76.65	436.42
7.61	39.37	1015.84	83.73	483.74
27.63	64.96	1006.3	75.38	434.22
6.1	40.07	1020.21	67.24	494.43
17.45	42.28	1007.64	69.19	463.83
18.49	41.1	1001.9	59.99	460.76
32.67	77.95	1014.62	50.73	432.32
7.07	37.49	1010.35	87.19	481.58
13.79	42.07	1018.27	88.06	462.25
26.48	51.43	1006.76	74.3	438.1
15.07	39.3	1019	63.62	464.7
31.49	73.5	1010.71	40.16	432.13
27.13	69.45	1013.9	51.16	434.47
15.56	41.04	1025.8	64.81	457.11
11.9	39.16	1016.53	84.59	477.75
24.28	71.98	1006.34	90.45	432.47
11.11	37.5	1013.68	73.67	473.32
33.01	68.67	1005.2	51.41	433.94
13.28	43.8	1023.17	63.98	466.78
24.41	56.9	1006.58	77.94	439.51
10.74	44.85	1014.25	71.61	476.83
16.3	39.63	1004.64	85.61	464.11
14.42	44.66	1016.1	93.89	461.34
24.26	66.44	1011.33	55.32	445.63
21.62	50.05	1007.2	92.9	444.16
11.87	41.78	1012.97	64.79	470.84
12.36	48.04	1012.8	93.59	468.37
26.12	63.94	1017.97	44.81	441.46
10.1	41.58	1021.26	94.06	468.19
8.99	39.04	1021.99	75.98	483.35
22.16	65.48	1017.22	70.51	446
11.97	45.51	1016.84	81.47	472.82
30.01	65.18	1012.87	43.95	436.91
17.51	58.86	1016.78	83.63	453.2
22.75	57.76	1017.83	66.54	452.33
23.66	61.86	1013.33	83.09	444.27
16.18	43.99	1021.97	80.96	460.81
19.4	49.69	1012.89	75.53	455.6
32.84	68.14	1003.59	43.88	425.18
17.37	48.92	1011.91	58.4	455.53
28.42	73.5	1011.23	72.79	435.59
26.22	69.89	1015.46	76.63	433.61
29.8	64.69	1006.6	54.43	437.85
26.35	59.87	1013.24	73.63	447.26
28.76	69.48	1008.62	55.86	430.14
25.88	63.47	1011.95	65.87	443.94
31.87	70.94	1006.94	50.78	429.41
17.82	56.89	1014.24	77.73	453.83
31.44	72.86	1003.74	61.45	433.59
6.98	40.35	1011.92	94.72	484.19
27.76	72.58	1009.04	84.96	429.25
9.75	35.76	1019.88	62.31	474.31
5.15	45.87	1008.02	98.36	479.61
21.81	65.46	1013.97	52.16	444.66
26.65	74.67	1015.73	77.32	435.9
12.81	45.51	1015.46	79.97	469.27
23.09	60.95	1015.02	68.78	450.31
24.03	66.54	1012.19	69.15	438.08
27.67	69.59	1009.13	82.15	437.29
25.79	67.17	1007.89	81.38	440.75
16.39	41.96	1011.7	94.85	463.99
21.04	47.43	1007.15	64.82	450.27
24.95	76.16	1006.2	76.16	437.47
30.34	71.25	1000.94	67.29	431.18
13.78	42.03	1017.51	84.94	467.6
24.77	71.94	1006.77	88.86	432.27
31.68	73.68	1014.85	64	431.11
21.91	70.32	1009.17	90.57	439.29
22.4	68.31	1009.52	83.5	446.91
22.99	68.67	1006.65	77.62	446.67
2.58	39.42	1028.68	69.03	488.69
11.36	41.48	1012.8	76.16	465.37
21.44	60.32	1015.2	81.1	448.84
21.58	67.25	1017.39	79	446.15
18.89	58.66	1010.96	84.07	453.33
6.62	42.49	1008.74	94.57	482.74
12.8	39.16	1015.94	89.83	472.47
9.59	37.14	1013.8	72.85	474.74
30.02	68.24	1009.8	65.73	429.5
15.62	40.12	1013.03	96.26	462.59
15.9	41.35	1006.28	78.2	464.03
8.94	43.13	1014.82	76.66	483.63
12.79	41.62	1010.52	81.83	466.91
16.88	39.99	1007.08	74.29	462.83
25.58	64.45	1011.07	61.47	447.16
21.37	57.76	1018.8	70.12	454.66
11.49	41.54	1020.17	70.91	476.74
13.93	42.86	1032.37	71.11	468.88
9.43	41.4	1028.42	84.92	479.28
9.43	41.4	1028.81	85.83	475.8
13.71	43.41	1015.45	69.26	466.06
30.22	74.9	1003.57	67.15	434.17
13.57	42.99	1007.51	88.95	472.04
24.51	58.79	1016.11	61.7	443.5
12.11	41.17	1019.46	62.59	475.53
17.34	44.78	1007.81	56.38	454.97
20.73	41.1	1001.86	47.51	456.44
31.18	77.95	1014.89	65.62	431.58
8.29	36.08	1020.38	81.53	483.26
16.7	46.18	1011.4	95.51	458.05
18.02	49.78	1003.86	100.09	451.41
27.62	63.9	1013.11	43.56	442.89
25.8	71.58	1010.08	85.14	435.2
18.86	51.43	1010.27	86	446.91
14.71	52.72	1024.7	70.29	462.34
26.92	68.27	1008.11	61.73	435.17
23.13	72.24	1010.92	92.3	437.67
10.75	45	1023.68	89.37	481.96
14.05	40.35	1011.52	66.21	475.54
10.8	40.22	1011.25	84.57	478.21
8.64	39.69	1001.57	98.27	473.55
21.36	58.95	1018.35	78.87	443.93
11.1	44.85	1014.27	65.08	477.03
31.81	66.44	1011.21	53.55	426.84
28.99	68.24	1008.75	66.57	428.28
10.31	45.01	1018.42	93.67	473.74
21.94	58.79	1010.3	88.21	447.52
28.18	77.54	1011.99	74.72	430.55
21.17	59.8	1016.06	77.73	455.66
26.16	63.76	1010.03	68.77	437.24
15.43	39.64	1008.58	87.99	464.05
10.08	41.16	1023.14	96.03	469.17
27.83	72.29	1012.04	48.86	445.73
11.83	38.25	1013.36	85.33	473.31
28.5	73.77	1002.82	86.38	431.7
9.97	41.62	1013.99	96.02	464.86
25.87	57.32	1012.06	44.13	442.87
33.96	68.94	1006.93	47.39	427.06
26.64	62.44	1011.81	72.46	438.67
9.39	39.66	1019.22	75.33	482.16
17.19	58.86	1016.74	85.97	451.87
25.15	68.61	1011.03	53.59	447.91
9.77	41.44	1017.69	78.26	481.74
20.13	47.03	1012.59	83.03	459.15
32.16	66.25	1008.17	56.88	434.5
10	39.66	1016.83	78.91	479.97
3.74	35.19	1018.58	98.84	490.5
14.6	44.84	1023.58	88.21	464.88
24.96	69.68	1011.37	63.12	447.2
9.11	40.02	1031.1	83.02	479.03
22.25	51.86	1013.08	83.64	451.04
23.77	59.21	1011.97	80.08	440.08
16.73	58.59	1015.02	89.61	455.3
10.4	40.43	1025.46	75.09	492.09
21.95	68.08	1012.91	69.36	443.93
27.58	73.06	1009.63	88.31	438.1
29.79	69.34	1008.82	65.13	434.74
13.74	42.74	1029.54	70	465.92
12.19	41.17	1019.43	65.47	475.64
7.98	40.77	1008.69	98.65	480.72
17.28	44.06	1018.15	66.93	462.05
25.57	59.43	1008.88	61.19	438.9
22.19	58.49	1010.91	77.03	449.4
20.58	50.78	1008.87	91.18	445.03
24.91	52.3	1008.72	68.26	441.15
30.49	64.44	1013.43	51.73	438.09
12.03	40.75	1015.93	85.07	474.97
32.21	68.14	1003.34	62.44	426.56
18.76	44.71	1015.15	30.83	462.18
21.5	59.87	1019.05	76.56	444.05
25.69	57.32	1012.34	44.18	441.43
16.89	49.21	1015.19	70.39	458.25
24.41	73.67	1007.39	86.92	435.56
11.01	40.22	1011.13	83.09	476.69
10.22	39.64	1010.72	63.05	477.22
29.89	64.69	1006.37	58.78	435.39
9.75	36.66	1026.21	70.12	479.45
18.64	67.71	1003.84	89.63	442.26
29.42	56.9	1006.51	53.6	439.51
9.45	41.4	1027.06	87.35	479
26.17	59.92	1010.01	73.75	444.96
23.56	49.16	1003.31	66.98	445.36
22.83	65.18	1012.24	79.74	442.43
25.58	47.01	1014.5	63.53	454.39
15.63	40.56	1018.68	59.44	472.15
22.18	59.8	1016.77	73.16	453.24
29.25	69.13	1010.27	67.35	426.29
8.67	36.66	1026.8	84.36	480.38
22.8	69.23	1011.8	76.95	439.3
14.85	58.59	1014.04	89.85	454.62
29.14	67.45	1015.51	46.47	433.34
9.08	40.46	1019.48	77.37	476.81
31.12	68.14	1003.67	67.36	427.06
13.87	41.74	1021.42	64.02	472.12
26.81	74.9	1003.99	79.88	435.56
26.23	59.87	1012.93	66.62	447.16
10.98	41.54	1019.94	69.83	479.08
14.2	52.75	1025.64	61.02	465.48
13.78	38.28	1014.8	81.19	467.43
23.77	64.15	1021.02	55.87	448.43
11.09	41.58	1020.99	91.09	464.81
21.99	42.48	1011.77	74.04	456.65
14.69	54.3	1018.01	73.4	462.63
17.02	51.86	1021.53	81.28	460
16.8	44.9	1009.14	79.78	456.42
24.42	64.79	1016.12	69.32	449.1
6.81	37.49	1010.74	88.25	482.21
6.91	36.08	1021.82	84.31	486.37
24.4	62.26	1011.62	70.1	439.06
15.83	41.67	1013.39	74.12	464.93
10.88	44.63	1020.52	86.81	469.57
26.93	67.07	1005.65	60.26	437.76
20.38	66.54	1013.95	77.8	448.93
13.11	41.44	1015.55	74.45	471.61
24.51	65.12	1016.18	62.39	447.46
12.76	40.27	1006.58	49.34	474.03
19.69	57.32	1012.41	75.51	449.59
28.57	69.34	1007.98	65.55	439.46
26.96	72.58	1009.23	89.62	429.03
7.87	41.17	1020.33	77.77	486.2
25.04	63.86	1018.92	52.79	441.6
9	40.78	1025.39	99.22	468.5
16.64	45.87	1009.02	98.86	456.79
12.25	44.58	1016.47	81.15	475.24
21.61	58.62	1017.61	76.07	449.11
19.95	58.46	1017.45	89.46	447.1
11.77	40.71	1024.55	72.49	477.94
9.6	41.82	1032.93	72.63	475.01
37.11	68.94	1006.23	31.15	429.25
26.88	59.21	1013.54	58.13	437.11
28.15	72.99	1007.62	70.03	431.83
10.4	42.44	1014.24	93.48	480.04
9.14	37.36	1015.22	78.06	491.97
24.54	44.89	1010.05	59.13	445.11
7.95	41.26	1008.48	97.92	480.6
8.32	39.64	1010.93	78.21	479.69
28.55	74.33	1011.77	73.34	426.48
27.82	52.84	1006.23	52.18	440.31
22.76	44.05	1006.95	74.07	450.31
24.7	50.23	1016.23	62.03	454.42
30.15	69.88	1007.2	73.67	434.75
15.19	41.43	1011.34	89.67	470.41
15.75	47.45	1009.86	86.68	451.5
6.11	38.68	1017.53	79.23	482.97
29.9	64.79	1016.9	48.24	441.41
13.66	45	1021.97	79.04	473.12
25.05	58.59	1013.37	66.14	442.93
13.77	43.13	1016.63	62.13	468.45
11.82	41.17	1019.5	55.74	475.61
23.54	65.27	1013.78	64.28	445.19
23.28	60.84	1017.91	67.5	444.13
22.97	72.24	1011.15	95.85	437.41
22.97	62.4	1010.25	75.18	445.3
9.37	44.77	1020.61	87.31	474.41
21.08	46.93	1014.49	63.33	453.87
19.32	52.9	1016.86	68.2	457.66
20.61	65.61	1014.91	83.82	449.72
23.29	65.61	1014.81	70.27	447.67
11.91	44.45	1021.39	84.49	466.52
26	70.47	1009.61	74.66	435.05
13.98	54.3	1015.58	74.91	466.52
16.69	46.18	1011	97.85	458.57
12.35	44.2	1017.81	82.49	471.65
11.88	40.64	1020.5	85.43	470.06
23.76	58.41	1013.85	85.38	445.85
25.52	71.73	1009.91	79.55	434.67
24.73	70.72	1009.82	88.79	439.3
12.66	40.35	1011.37	82.77	473.11
18.23	45.01	1012.24	73.86	454.06
27.62	72.43	1007.54	71.33	428.76
18.98	38.52	1018.85	63.16	454.6
21.81	65.06	1014.6	66.41	447.13
23.88	69.94	1007.48	61	440.63
16.22	46.36	1020.04	91.73	460.73
20.67	57.5	1014.42	81.89	453.29
13.33	39.39	1013.93	84.74	471.23
28.38	72.39	998.93	73.85	432.02
7.06	41.38	1021.94	83.55	487.71
26.5	66.75	1018.48	61.62	431.23
21.47	58.79	1017	76.97	446.33
18.22	45.09	1013.62	75.56	454.74
9.69	40.46	1019.1	71.91	472.16
12.38	44.2	1020.23	81.5	467.04
11.68	40.55	1017.31	99.82	473.51
22.84	67.32	1013.77	64.67	438.36
11.93	38.78	1013.15	96.08	474.57
15.46	44.88	1017.52	93.32	461.2
19.62	68.63	1012.26	68.05	453.84
22.99	61.02	1009.88	81.56	440.85
8.93	40.46	1019.03	71	472.77
25.08	61.02	1010.01	73.21	437.31
18.93	67.71	1005.04	82.4	444.55
26.31	52.09	1013.39	53.59	447.04
17.37	58.49	1012.2	91.14	456.29
16.62	52.05	1011.96	67.81	457.89
32.02	67.83	1007.77	53.31	426.55
30.28	58.9	1005.03	54.59	439.06
24.5	58.66	1011.54	57.92	451.03
31.04	66.54	1003.83	53.05	431.66
23.47	60.77	1017.19	75.36	444.46
23.72	70.47	1010.65	75.39	438.5
28.79	68.51	1013.02	62.84	432.51
8.66	41.01	1022.51	98.55	472.16
26.77	68.08	1010.83	63.48	432.91
6.38	40.07	1018.53	60.2	492.96
22.85	59.15	1014.74	63.92	448.61
22.88	65.48	1017.33	66.26	447.14
20.3	58.46	1015.93	82.13	448.79
23.23	64.69	1008.12	76.6	444.01
24.87	65.75	1006.45	65.75	435.6
12.74	41.5	1012.94	86.28	469.92
12.33	39.85	1012.53	66.04	479.32
26.71	70.4	1007.59	82.63	432.64
13.42	41.23	994.17	95.79	468.82
7.6	41.04	1021.82	88.97	475.32
27.15	73.9	1007.57	74.42	433.09
17.28	39.99	1007.09	74.25	463.28
20.28	68.63	1012.42	70.31	454.36
15.27	38.73	1002.83	77.77	465.99
14.29	37.85	1009.98	92.81	468.63
26.7	70.32	1011.04	86.41	438.46
14.73	39.82	1012.67	80.82	470.41
10.36	41.46	1017.53	92.04	478.27
16.5	39.72	1003.05	65.99	459.06
13.43	43.69	1016.21	73.01	475.36
30.12	69.68	1012.89	60.64	436.34
18.36	62.1	1019.9	79.09	453.5
22.35	57.76	1017.92	68.18	453.74
22.89	65.34	1015.53	61	450.53
9.68	41.06	1022.75	87.44	476.67
25.66	70.02	1010.89	68.14	442.2
22	59.54	1004.55	95.25	439.37
16.74	41.16	1006.87	74.24	463
26.78	52.3	1008.52	61.23	441.21
10.95	40.22	1010.04	78.96	477.23
33.79	69.05	1001.62	40.13	435.1
23.8	48.6	1002.43	67.32	440.89
8.06	39.96	1024.23	94.48	476.03
25.54	70.47	1009.28	73.5	436.16
18.27	50.16	1011.07	95.91	451.76
26.23	70.72	1009.73	73.44	445.28
30.93	73.42	1010.98	56.42	432.44
30.04	67.25	1017.65	52.84	435.17
20.62	48.41	1007.37	87.51	445.4
14.81	43.7	1015.1	60.72	469.5
31.71	73.5	1010.63	40.17	430.45
5.76	40.07	1013.22	62.99	494.67
15	41.17	1015.57	64.82	468.72
25.97	68.12	1013.11	61.97	437.11
29.47	71.32	1008.07	67	437.14
23.96	51.3	1011.81	71.81	451.11
8.99	41.26	1020.52	91.96	476.09
26.92	62.44	1011.09	70.8	437.99
19.13	42.18	1001.45	98.77	456.04
26.82	65.27	1013.6	53.85	437.84
12.04	42.34	1019.72	94.67	465.36
23.17	62.39	1008.04	89.42	439.29
23.72	58.62	1016.32	71.17	447.13
14.84	41.48	1017.26	63.42	460.3
22.37	50.78	1008.84	82.06	449.08
26.21	56.85	1011.45	41.37	439.55
9.08	36.71	1025.07	81.32	479.02
2.71	39.42	1026.66	81.11	489.3
17.82	65.94	1013.44	88.13	452.82
15.65	39.59	1012.8	87.63	461.94
29.45	70.02	1010.28	65.93	437.82
28.44	67.07	1006.08	50.42	433.15
28.19	71.97	1008.85	84.67	438.8
13.75	41.49	1019.9	88.23	469.02
6.49	36.3	1016.52	69.1	483.43
15.81	54.3	1017.8	68.45	461.63
34.09	68.51	1009	32.96	431.19
18.8	44.71	1016.56	31.29	459.85
25.14	64.63	1020.63	54	446.63
28.09	77.95	1017.07	70.98	436.94
9.78	52.75	1022.97	78.31	469.58
23.74	65.34	1013.7	62.9	447.31
11.95	41.48	1013.44	74.83	465.41
19.5	40.79	1003.8	89.45	457.09
27.23	63.9	1014.3	47.19	443.61
13.94	38.47	1015.03	53.9	466.54
21.83	63.13	1013.4	85.82	443.41
15.46	37.64	1014.57	87.53	462.96
28.39	65.51	1014.52	66.48	438.78
14.48	44.06	1018.73	75.88	467.46
25.76	63.94	1018.49	42.14	445.78
8.25	37.49	1009.02	81.09	480.38
19.64	46.33	1013.33	98.99	451.45
26.25	61.02	1011.47	71.22	436.44
24.37	65.61	1014.5	65.67	443.13
23.45	45.61	1012.84	73.42	454.92
25.89	48.41	1008.59	65.38	442.12
32.38	73.91	1004.05	61.69	430.17
26.05	58.59	1012.32	49.83	452.41
25.27	69.89	1015.21	79.33	436.33
33.2	73.88	1005.67	48.48	438.12
12.93	41.39	1018.5	80.28	472.57
10.59	42.49	1009.59	77.36	477.49
11.66	44.6	1018.39	89.98	471.3
14.26	44.47	1028.81	72.19	465.77
17.27	43.52	1021.37	76.73	460.08
8.64	38.56	1016.51	66.03	484.45
25.14	69.13	1011.15	85.67	433.95
28.12	73.42	1011.49	80.16	435.46
6.41	40.81	1026.57	93.51	484.49
14.49	44.84	1024.09	86.55	465.72
10.07	34.69	1028.09	70.52	478.65
9.42	41.4	1029.21	86.4	474.75
29.63	69.71	1009.04	67.26	435.27
30.12	74.16	1013.13	63.56	433.08
18.76	58.79	1016.66	88.22	453.44
20.37	54.9	1016.94	65.86	453.94
11.7	25.36	1008.65	92.11	470.88
22.21	45.01	1012.22	54.84	450.6
19.95	57.25	1011.08	88.04	453.03
25.15	71.14	1011.68	70.33	434.99
27.96	77.24	1007.23	78.51	433.35
33.4	69.98	1013.29	47.78	432.44
21.6	59.8	1016.9	76.59	450.14
14.13	40.75	1016.05	72.41	471.44
8.13	71.14	1018.94	86.7	471.99
17.65	62.1	1019.63	84.3	452.2
16.58	38.01	1023.5	60.14	464.03
20.76	59.21	1017.94	80.84	447.67
28.31	66.17	1009.75	72.66	444.51
23.12	69.71	1008.98	84.41	442.21
24.94	62.96	1019.76	58.44	443.48
5.67	45.87	1008.91	93.29	478.44
7.44	38.5	1012.81	70.27	488.12
25.42	75.6	1017.39	77.63	438.24
9.47	41.4	1026.21	89.08	480.79
22.03	64.79	1017.95	76.2	450.25
21.09	67.07	1004.38	89.01	444.75
24.2	60.95	1014.82	59.42	448.43
13.4	41.58	1020.5	71.17	461.54
11.06	40.64	1021.47	96.16	479.13
22.56	60.29	1018.19	67.53	447.15
26	69.88	1007.99	87.07	434.79
18.81	52.08	1004.43	99.6	450.87
10.39	40.96	1023.51	84.73	479
27.58	71.97	1008.51	87.99	430.53
15.29	41.35	1006.32	82.56	466.27
11.86	40.27	1008.06	72.91	474.57
10.59	41.54	1019.94	72.52	478.74
22.7	64.05	1012.65	89.69	448.76
10.39	40.22	1004.95	91.65	476.49
9.54	41.17	1019.79	65.61	481.18
24.56	58.82	1011.42	72.47	442.76
13.61	42.34	1017.57	91.35	465.65
25.89	48.41	1008.49	68.58	440.92
17.1	49.69	1005.53	81.82	457.32
22.32	48.41	1008.68	79.11	445.36
19.22	65.06	1015.05	82.5	446.98
28.11	66.17	1010.51	65.16	444.2
9.42	41.4	1029.99	88.41	477.01
12.27	41.17	1019.39	52.18	473.84
7.1	41.74	1022.25	91.07	484.12
11.83	44.6	1018.49	89.06	469.96
7.33	41.16	1023.17	92.43	466.16
26.31	48.6	1002.64	60.04	440.06
22.08	69.94	1008.41	72.86	441.57
24.33	68.08	1013.02	64.81	442.93
4.49	40.27	1012.01	76.5	494.24
23.5	54.42	1012.31	68.29	455.38
6.61	38.68	1017.5	63.88	483.88
25.2	63.76	1009.78	64.96	438.15
31.99	53.53	1004.98	53.53	432.43
22.7	59.92	1011.05	90.84	436.7
32.84	74.67	1015.89	31.81	430.88
8.09	43.02	1014.79	81.06	484.35
26.73	68.84	1010.75	66.83	440.45
27.25	50.05	1006.53	60.64	439.63
28.67	69.14	1008.24	72.68	433.79
6.76	36.25	1028.31	91.16	484.36
8.36	40.22	1011.6	89.18	484.66
12.37	43.22	1009.1	76.06	468.49
29.08	52.84	1006.14	40.09	438.24
12.31	44.03	1007.78	94.42	468.13
24.39	63.77	1013.3	77.53	443.65
18.26	60.95	1016.94	78.91	457.03
18.72	60.07	1015.81	70.55	454.35
32.2	69.68	1012.12	42.47	437.35
24.32	59.14	1017.46	80.14	438.08
10.77	41.46	1021.42	87.18	479.22
20.94	49.02	1008.91	87.32	448.18
9.84	36.66	1026.7	70.02	477.62
5.74	40.62	1016.31	84.91	481.15
22.38	49.3	1003.56	83.83	441
7.8	39.04	1018.46	66.5	482.31
32.41	67.83	1008.54	55.96	426.85
24.42	65.94	1011.25	65.04	439.63
12.32	43.69	1016.26	83.18	471.6
14.04	40.2	1013.29	89.54	465.25
18.77	58.66	1010.34	87.25	454.54
24.54	60.23	1011.55	72.78	445.25
11.92	41.2	1016.99	81.24	476
14.1	44.92	1023.95	89.5	467.22
25.21	59.21	1013.19	62.85	438.7
26.56	65.59	1012.6	64.25	443.66
21.32	48.14	1016.57	71.81	449.09
20.99	67.07	1005.17	82.41	442.02
8.8	39.42	1025.17	68.72	476.5
17.14	40.55	1000.05	71.41	461.21
20.92	70.02	1011.06	85.63	437.96
25.75	71.14	1008.33	77.12	433.64
16.48	68.28	1004.27	99.89	449.7
8.43	40.6	1015.39	91.81	483.1
23	60.27	1018.72	84.25	442
10.87	42.02	1002.08	95.22	472.63
23.57	61.47	1009.27	84.17	435.82
22.35	51.43	1011.34	77.33	445.34
27.58	78.05	1010.83	94.98	431.95
23.34	63.73	1012.1	79.11	443.68
27.47	66.86	1006.1	70.2	437.45
28.66	74.93	1014.04	51.26	440.79
10.76	40.78	1023.81	87.96	469.97
14.8	44.92	1024.06	91.67	464.01
17.31	44.71	1017.43	35.4	463.05
21.83	57.85	1012.49	75.16	448.21
26.8	72.58	1009.22	89.03	431.18
19.85	56.53	1020.57	74.05	457.17
26.09	49.3	1003.79	66.19	439.82
18.87	52.08	1005.25	99.19	449.61
24.93	73.5	1011.28	83.09	437.35
18.71	53.16	1013.26	82.64	455.7
22.28	58.86	1014.08	66.47	446.55
31.94	69.98	1013.32	56.17	432.03
26.88	60.96	1012.1	57.9	446.77
26.15	63.21	1012.31	76.44	441.23
21.49	61.27	1019.81	63.21	450.07
27.97	66.17	1010.81	63.73	441.7
3.4	39.64	1011.1	83.43	459.86
27	69.4	1004.86	82.2	433.83
31.3	70.79	1004.3	54.37	428.75
24.44	59.14	1016.74	71.82	443.5
30.72	69.13	1009.94	61.66	435.83
20.34	69.45	1012.76	91.05	442.73
9.59	38.56	1017.01	60.1	481.3
23.79	58.2	1016.77	55.88	446.88
13.49	43.41	1015.75	57.86	461.06
27.62	71.14	1011.6	52.8	434.72
25.11	58.79	1015.99	60.55	442.34
20.48	60.29	1017.16	72.1	455.51
8.53	38.18	1017.54	76.49	480.86
11.48	37.92	1008.47	70.55	472.9
14.82	42.74	1028.04	69.81	466.34
27.37	65.06	1013.09	50.92	440.5
19.82	58.16	1016.76	74.66	455.5
5.49	40.81	1014.43	90.41	487.36
10.62	39.96	1025.37	96.64	470.8
15.67	45.17	1018.73	94.74	462.09
22.67	58.2	1016.91	60.75	446.36
6.86	38.08	1019.62	77.37	486.92
18.36	51.43	1010.57	90.17	459.8
16.85	41.35	1006.14	79.21	463.37
20.37	52.05	1012.34	62.57	456.11
26.1	62.91	1012.44	60.91	446.05
29.85	71.58	1010.04	58.66	432.26
16.47	44.89	1010.04	82.01	459.69
27.5	59.54	1004.88	72.7	438.81
16.49	49.39	1018.1	93.13	461.54
26.03	59.07	1007.3	82.52	440.6
12.27	41.17	1019.41	58.1	475.13
30.68	71.8	1010.81	61.4	435.4
14.04	48.79	1017.62	75.25	464.09
25.48	60.29	1017.55	51.22	443.77
20.34	46.63	1013.16	79.08	453.62
16.2	65.46	1013.97	89.84	451.86
6.52	39.85	1012.55	86.36	483.01
21.36	59.54	1007.99	92.62	446.09
27.01	52.3	1007.78	60.38	439.51
20.72	68.61	1011.25	87.1	447.89
13.61	42.34	1017.78	88.84	466.17
21.03	67.45	1015.01	68.59	447.11
20.45	59.8	1015.13	79.21	452.96
20.54	68.12	1012.23	81.06	440.28
10.45	41.01	1020.57	93.84	465.74
30.74	71.77	1006.24	53.38	434.89
17.89	44.78	1010.03	53.78	457.74
27.32	73.42	1012.07	86.3	432.74
19.88	44.6	1015.52	37.85	467.68
16.57	41.79	1005.82	72.25	452.84
26.88	73.56	1004.85	94.36	430.63
14.47	48.79	1017.05	69.87	466.25
22.29	45.01	1012.4	51.58	449.08
19.62	62.96	1020.76	76.53	456.02
10.28	41.46	1018.44	85.23	479.66
21.23	61.5	1008.98	82.14	450.92
26.91	74.99	1005.64	78.98	437.06
13.85	45.08	1024.86	83.85	468.35
8.02	39.04	1018.49	68.07	479.53
5.34	39.22	1012.73	81.42	472.66
24.96	65.18	1012.68	76.19	436.24
29.67	71.98	1005.16	67.75	425.14
7.36	41.01	1025.49	96.48	477.37
21.82	63.9	1014.48	92.53	447.29
16.88	38.58	1014.72	73.99	462.7
16.72	44.78	1007.75	56.79	453.39
27.36	63.31	1013.7	51.58	440.4
15.64	44.21	1020.17	83.28	462.42
14.84	42.03	1017.47	79.27	466.2
22.33	70.79	1006.02	93.35	436.74
25.47	59.92	1010.08	77.18	439.84
25.97	43.21	1011.9	88.73	434.83
19.36	39.54	1008.97	58.92	458.75
13.64	44.88	1019.85	56.86	466.66
8.19	41.66	1016.57	75.38	485.2
22.29	43.79	1015.68	41.75	461.23
21.59	66.54	1004.88	90.54	441.71
27.31	68.14	1005.73	50.74	437.83
9.51	40.81	1015.69	82.52	475.29
19.18	58.2	1017.46	76.72	453.2
24.26	68.14	1005.09	59.49	438.79
28.62	70.94	1007.38	53	432.71
23.61	63.94	1012.9	87.06	441.57
26.15	64.27	1013.03	59.77	439.11
17.8	46.48	1007.27	81.31	452.66
19.7	51.3	1014.88	88.1	454.94
26.11	73.17	1009.8	65.18	434.94
10.22	38.18	1018.01	70.7	474.07
23.25	63.78	1016.01	72.01	448.82
13.64	34.03	1018.32	62.2	469.61
30.18	65.74	1012.63	47.74	441.65
26.21	65.12	1016.06	44.31	444.44
28.86	73.67	1006.65	68.23	431.15
6.22	38.68	1017.87	69.41	483.55
16.06	47.45	1009.97	88.09	450.62
25.06	44.57	1007.39	56.07	443.66
25.94	77.24	1007.97	84.82	432.88
17.72	50.9	1012.02	85.55	456.4
19.6	60.95	1015.4	84.26	456.06
23.83	64.15	1020.93	63.86	447.95
13.16	54.3	1017.33	82.43	468.4
16.8	56.03	1020.65	85.26	461.96
6.18	41.55	1001.58	98.79	484.87
21.16	78.11	1006.73	78.11	435.71
21.28	70.32	1011.06	90.12	439
29.45	75.6	1018.12	50.68	437.31
17.46	39.99	1008.52	69.73	461.01
31.53	70.94	1007.11	50.04	431.84
13.42	38.91	1012.81	73.82	472.22
28.88	54.89	1007.16	46.6	440.99
28.44	74.93	1013.88	52	441.52
7.05	43.65	1018.41	72.36	480.47
8.31	40.46	1020.07	78.18	476.72
3.69	38.44	1016.74	82.87	490.78
11.21	44.03	1007.95	93.03	471.79
19.46	46.33	1013.77	89.62	452.11
10.74	52.75	1021.75	75.41	467.48
28.01	73.18	1012.25	75.02	431.02
23.63	58.79	1017.2	67.68	442.86
24.89	64.27	1013.52	64.65	444.21
31.06	67.17	1007.62	65.54	437.91
27.3	65.12	1016.24	44.87	442.78
24.4	69.94	1005.75	58.1	438.76
26.45	75.6	1017.42	74.5	436.89
15.12	52.05	1014.63	80.38	464.78
32.13	69.98	1013.3	55.85	431.84
15.55	43.02	1011.97	44.66	466.2
24.6	75.23	1012.04	76.77	434.07
11.48	44.6	1018.29	90.76	470.39
27.53	70.32	1007.75	49.31	433.72
23.69	58.05	1012.08	74.26	444.46
9.2	39.99	1011.73	85.95	484.04
25.42	69.71	1009.29	82.5	435.59
13.69	40.83	1008.53	84.81	471.26
14.86	43.14	1019.21	99.14	461.14
29.82	43.21	1011.52	63.54	433.31
10.25	41.26	1007.44	98.08	476.03
6.91	39.37	1019.58	71.02	488.2
7.44	41.04	1021.84	88.56	479.08
27.46	68.08	1013.06	46.49	433.72
26.36	73.68	1013.99	86.44	430.39
11.56	41.62	1012.5	91.42	460.6
18.43	56.03	1020.41	60.55	465.17
33.5	70.8	1008.99	57.24	433.19
10.02	41.44	1017.37	77.65	479.63
28.53	49.3	1003.83	59.69	438.17
26.94	68.24	1010.49	76.58	430.34
13.52	39.39	1012.91	84.03	474.82
23	57.76	1017.64	56.86	451.39
15.26	46.18	1013.68	98.58	463.6
27.98	67.17	1007.32	75.29	440.68
30.96	71.77	1006.26	52.76	425.66
19.89	51.43	1007.38	91.79	448.85
30.62	66.54	1004.11	55.36	429.01
12.16	40.81	1025.79	70.97	476.63
6.49	39.33	1010.85	91.85	489.22
13.85	44.9	1019.11	76.79	467.2
25.02	69.75	1010.04	91.86	437.87
25.77	59.39	1014.76	69.99	438.64
18.86	42.18	1001.16	98.58	457.07
22.56	70.79	1005.85	93.09	435.14
21.93	57.17	1009.81	81.15	448.75
5.95	39.48	1005.16	63.6	486.07
24.13	45.61	1012.63	71.36	453.19
20.21	60.84	1018.5	82.73	447.73
21.82	58.66	1011.71	64.37	452.16
11.73	40.64	1020.68	96.98	477.06
24.05	72.24	1011.32	88.94	437.81
12.25	41.38	1021.81	59	474.77
23.59	59.43	1009.96	65.8	440.61
22.44	63.86	1020	64.83	447.3
13.38	40.89	1010.48	92.55	472.15
18.1	48.06	1015.47	82.47	454.04
31.32	74.33	1012.92	36.48	429.57
8.83	41.92	1031.8	78.97	483.38
14.16	44.06	1018.92	76.34	464.91
22.08	41.1	1002.19	46.69	455.04
10.27	41.44	1017.04	77.09	479.3
6.26	41.31	1002.04	87.54	485.57
21.9	47.43	1006.8	60.48	452.13
29.28	77.17	1009.4	76.3	433.14
10.72	41.17	1019.68	60.71	479.21
5.89	40.07	1018.99	63.13	493.9
13.27	42.28	1008.3	86.2	468.86
7.05	40.69	1020.53	89.67	476.75
6.14	39.4	1011.21	90.87	485.94
24.2	59.07	1009.25	88.25	441.93
5.63	39.22	1013.35	77.67	486.83
7.97	38.5	1013.84	72.36	487.19
27.21	66.49	1013.57	40.11	439.04
24.18	66.48	1003.3	70.99	433.37
28.38	64.05	1010.19	71.84	439.83
6.42	35.57	1025.58	79.63	485.86
23.24	63.78	1017.1	63.8	446.95
13.94	42.86	1012.35	88.78	471.64
15.37	43.67	1011.9	91.48	468.23
23.46	57.85	1012.7	65.54	444.66
26.72	67.79	1010.35	63.31	444.68
16.39	41.67	1012.96	61.07	467.68
27.76	71.97	1008.53	86.97	434.04
26.61	56.85	1012.48	48.84	437.26
25.01	68.63	1013.76	43.65	447.12
25.34	49.5	1013.25	50.8	457.12
28.37	72.86	1004.81	53.52	441.37
18.31	50.9	1011.87	86.83	455.5
20.71	45.61	1013.64	82.39	457.4
17.76	40.55	1002.82	73.77	461.8
21.74	70.32	1011.88	85.95	439.19
18.59	44.63	1003.99	86.22	459.65
24.09	63.94	1017.59	51.02	442.92
9.45	41.92	1029.32	91.09	467.79
21.89	74.93	1016.11	77.88	448.47
25.72	70.47	1010.44	70.57	434.94
5.7	40.35	1012.18	91.57	488.8
8.51	42.32	1015.08	84.89	476.6
13.09	41.62	1011.82	83.14	457.29
26.7	49.02	1007.68	67.97	438.92
14.57	42.18	1015.13	74.89	465.75
21.69	69.94	1010.7	80.8	443.67
31.6	73.17	1010.05	43.48	433.37
13.81	40.2	1013.66	88.16	464.23
10.12	41.78	1013.43	73.47	477.67
10.77	44.78	1012.87	84.16	470.66
28.13	56.9	1007.17	51.66	436.95
23.15	66.48	1003.71	76	435.62
25.35	71.98	1006.83	88.44	435.72
24.56	66.75	1018.5	77.47	435.03
9.45	39.04	1023.08	75.81	483.66
22.74	61.02	1009.56	79.41	445.56
31.12	67.69	1005.3	50.46	425.21
6.03	41.17	1019.81	84.2	488.57
12.26	43.48	1016.41	72.95	467.83
20.55	65.46	1013.87	58.09	448.83
8.74	36.3	1015.18	61.97	438.63
13.58	44.47	1029.91	70.41	467.15
10.7	36.18	1018.16	63.15	475.08
20.96	61.27	1019.99	67.32	448.77
25.6	71.73	1010.15	68.99	436.7
24.01	65.18	1012.57	76.02	437.27
6.23	40.96	1022.49	93.15	488.82
11.42	41.38	1021.98	60.19	479.23
19.26	65.61	1015.03	85.74	451.85
27.48	61.41	1012.2	45.06	452.24
24.49	68.61	1010.56	64.03	447.57
24.81	63.73	1009.34	83.61	440.43
18.11	43.43	1008.65	73.3	451.38
31.53	70.36	1006.29	57.11	438.71
20.27	57.76	1016.66	75.76	450.71
17.68	39.08	1002.77	74.24	454.18
28.85	66.54	1010.73	43.27	437.79
9.6	42.03	1017.66	92.27	474.65
31.2	68.24	1005.71	34.84	428.67
19.89	50.78	1008.85	92.97	446.35
22.98	73.17	1011.94	90.13	438.5
29.14	75.23	1010.15	54.87	434.82
30.96	69.82	1009.6	51.55	438.74
27.07	66.93	1017.32	55.38	446.48
15.99	39.63	1006.09	89.92	464.95
22.43	69.84	1006.94	75.54	436.19
7.28	38.56	1018.96	67.98	485.57
11.5	40.78	1023.91	86.31	467.74
14.72	39	1016.42	76.42	464.93
29.74	70.32	1008.1	52.72	432.69
19.68	44.34	1019.49	49.5	468.27
23.99	45.87	1007.63	52.62	443.66
27.77	63.9	1013.62	51.43	441.3
13.72	45.09	1012.95	87.41	466.24
24.64	58.49	1011.2	72.67	444.95
12.72	44.9	1007.6	71.8	463.49
28.27	66.56	1007.36	55.99	433.52
23.55	73.18	1011.85	87.97	437.88
10.57	37.73	1024.36	70.29	474.65
14.31	42.86	1031.14	69.6	465.36
31.23	75.08	1004.93	46.19	439.14
10.24	41.58	1021.17	94.34	465.86
23.07	70.47	1008.64	83.37	439.04
12.41	40.96	1023.36	78.96	473.59
27.96	49.16	1004.8	35.64	442.49
26.3	67.07	1006.26	63.79	433.72
24.23	59.04	1011.91	71.79	443.06
24.57	51.95	1005.8	70.07	448.15
20.08	58.79	1017.32	81.59	451.21
9.87	42.74	1024.61	87.74	470.9
19.16	63.09	1017.71	91.15	449.51
32.56	68.94	1007.12	58.18	425.61
12.5	43.67	1013.99	90.91	473.26
14.44	40.1	1015.51	79.78	468.19
21.3	41.1	1001.86	42.75	455.13
10.75	45.01	1018.73	93.16	471.47
7.99	41.38	1021.95	78.77	487.57
30.72	71.58	1009.98	50.39	430.46
23.5	50.78	1008.7	57.7	445.09
8.94	41.74	1022.55	90.74	483.53
6.75	39.37	1020.26	70.99	486.26
32.51	73.56	1007.06	59.6	435.23
10.94	25.36	1009.47	100.1	470.9
20.57	42.8	1013.1	75.48	460.43
7.96	38.91	1016.35	89.17	482.17
9.81	44.45	1021.19	90.55	471.32
18.47	62.1	1019.86	82.57	452.51
9.55	40.67	1018.56	70.72	486.34
12.16	45	1021.51	50.52	482.99
10.33	43.99	1020.7	96.68	474.17
21.43	63.47	1011.95	94.47	448.17
13.48	41.44	1015.64	71.46	471.39
11.52	40.8	1024.31	73.49	479.56
9.6	41.03	1021.01	69.03	481.73
6.59	39.37	1020.34	77.92	488.17
6.16	38.5	1012.83	93.68	490.92
12.51	49.83	1008.61	94.27	452.84
19.37	63.09	1018.79	81.52	450.18
26.51	50.05	1006.75	65.34	440.22
8.49	39.61	1021.05	87.74	483.94
26.51	44.57	1007.56	52.23	445.32
30.82	70.36	1006.47	58.79	439.16
21.14	67.71	1006.38	56.78	445.12
8.94	36.71	1025.5	80.45	477.62
26.52	65.06	1013.4	51.78	439.66
23.53	50.05	1005.63	78.4	443.71
24.18	66.48	1004	64.86	434.5
21.05	63.09	1016.49	91.23	447.45
23.23	63.31	1012.52	75.1	441.5
25.6	63.76	1010.18	67.43	435.75
8.88	36.66	1026.61	76.16	480.2
14.46	45.87	1009.21	84.09	464.5
24.04	59.43	1007.6	76.98	437.51
13.48	39.85	1012.71	58.91	475.74
14.66	43.13	1014.97	46.31	467.87
27.24	77.17	1009.37	81.51	439.12
28.37	75.6	1017.48	55.19	439.25
24.42	63.31	1012.64	71.8	438.39
25.42	67.25	1017.92	68.61	439.43
10.9	41.46	1016.66	86.2	479.45
24.1	68.61	1010.97	74.87	443.75
34.11	73.56	1006.77	45.92	432.78
28.36	60.23	1010.05	53.03	441.08
26.45	64.27	1013.23	60.92	444.9
25.88	74.67	1016.66	81.09	434.81
8.73	39.42	1025.63	69.87	474.44
27.13	59.54	1004.33	73.27	438.32
32.31	68.94	1006.11	71.78	431.14
17.42	44.06	1016.63	82.15	456.57
14.38	40.71	1023.46	66.12	473.41
20.56	59.14	1016.02	68.59	448.82
21.39	52.3	1009.52	88.67	447.77
7.64	43.79	1016.17	84.45	486.01
27.69	65.34	1014.31	46.59	442.84
20.56	60.08	1017.79	78.08	452.8
27.24	69.13	1009.28	70.85	432.36
23.92	63.21	1012.52	86.51	445.26
25.41	65.12	1016.01	53.39	442.86
23.38	58.82	1012.27	77.87	446.54
14.45	52.75	1023.97	63.59	459.85
4.11	38.44	1015.9	81.79	488.05
7.11	41.74	1022.35	90.68	487.85
22.76	57.5	1014.75	74.38	451.7
19.8	57.25	1010.84	88.9	451.75
22.2	57.17	1009.82	78.43	447.75
26.44	59.15	1013.35	60.71	439.65
31.11	71.8	1010.81	56.08	437.2
15.04	38.01	1022.46	78.29	468.12
6.5	38.5	1013.92	90.1	486.78
31.9	73.42	1010.82	60.58	432.27
21.81	60.27	1015.93	91.38	441.85
7.09	39.37	1020.07	73.26	487
19.88	47.03	1012.27	91.99	456.44
26.33	60.06	1005.86	41.57	450.16
14.6	44.47	1028.46	69.96	465.24
13.65	42.86	1015.41	87.67	471.75
23.6	65.48	1017.44	61.26	444.38
29.29	73.18	1012.4	66.65	430.31
10.65	41.78	1013.66	70.04	474.27
18.63	50.16	1010.21	97.13	450.14
5.91	39.33	1010.18	95.53	491.49
20.6	44.58	1017.67	48.36	466.2
27.17	73.5	1010.36	73.29	435.22
23.04	74.22	1009.52	90.93	440.32
15.63	37.87	1020.4	74.77	465.28
7.8	43.65	1018.92	60.77	479.78
10.42	41.46	1021.04	89.16	479.24
6.9	40.71	1021.78	94.8	471.43
23.67	68.67	1006.71	77.22	445.32
18.42	58.95	1016.95	86.77	452.1
9.61	39.04	1023.45	75.66	483.86
22.7	48.14	1014.06	60.09	448.96
24.54	48.06	1013.02	55.18	443.67
29.03	67.79	1010.86	54.03	445.03
10.28	39.61	1020.43	69.09	478.34
29.23	75.6	1017.72	52.26	438.92
25.1	71.77	1004.34	82.8	429.7
18.87	43.43	1009.16	69.5	454.58
25.91	67.07	1005.66	60.12	441.74
29.62	71.8	1011.05	63.13	438.55
11.04	39.96	1025.75	94.44	468.84
11.46	39.1	1010.17	100.15	470.55
30.96	64.44	1013.63	49.64	437.61
18.9	58.46	1016.74	87.65	449.32
10.57	41.26	1008.32	97.96	472.9
20.86	51.3	1012.03	92.46	449.67
11.37	39.16	1016.54	87.05	480.54
30.88	67.83	1008.97	54.99	425.36
14.47	42.86	1031.55	66.73	466.64
19.44	48.7	1008.66	94.71	444.9
25.57	44.05	1005.79	65.14	443.84
6.03	41.14	1028.04	87.46	479.61
28.5	72.99	1007.02	67.13	433.24
24.79	59.21	1017.9	53.83	446.04
29.53	77.54	1010.39	66.13	432.89
23.44	62.52	1016.46	67.21	447.19
17.37	41.23	998.79	68.44	461.08
13.56	43.67	1011.34	94.02	467.09
26.94	65.61	1014.31	49.73	443.9
23.68	59.27	1010.75	83.82	440.44
27.09	65.61	1014.22	48.13	442.94
12.75	39.85	1012.51	62.37	475.61
22.03	59.43	1006.88	82.05	442.9
13.93	44.9	1022.15	85.93	470.59
24.33	77.54	1008.5	82.45	435.38
10.37	39.04	1023.95	81.93	479.35
20.89	67.71	1006.12	59.12	445.39
18.38	62.1	1020.12	77.27	452.91
9.28	41.38	1021.96	72.22	486.18
28.32	71.64	1004.73	72.71	436.31
31.07	64.96	1005.2	58.93	428.63
23.35	71.77	1005.99	90.79	434.6
16.62	54.3	1017.99	63.76	459.59
22.12	60.37	1008.75	92.13	439.18
5.62	41.31	1001.37	89.16	485.6
22.21	69.71	1009.69	96.85	440.14
9.63	41.14	1027.99	87.89	469.73
19.51	48.78	1021.03	86.33	453.27
16.29	44.34	1019.49	59.36	468.8
23.57	70.04	1011.06	82.79	437.53
10.07	39.66	1015.37	83.78	479.64
11.6	39.96	1011.65	80.79	473.22
10.45	40	1019.01	89.01	465.43
11.56	39.28	1011.27	82.05	477.71
9.82	37.83	1005.29	100.07	473.66
16.14	54.3	1017.93	65.68	460.73
29.63	66.75	1018.08	58.46	433.26
22.68	50.78	1008.83	70.3	447.69
21.34	48.06	1014.49	63.23	458.13
29.5	72.86	1004.63	52.17	439.43
28.03	68.67	1005.52	58.16	438.8
18	43.7	1015.4	61.28	464.26
20.71	58.79	1017.48	86.67	444.39
27.01	63.78	1016.72	47.89	442.6
19.69	56.65	1020.86	73.41	455.32
22.5	58.79	1017.48	73.02	443.35
25.37	58.33	1013.49	51.42	444.46
14.78	41.17	1016.42	67.42	469.69
25.15	57.32	1012.41	41.84	440.1
13.46	39.85	1012.76	72.94	472.5
9.29	39.96	1026.2	97.55	473.51
13.58	39.28	1016.17	79.17	472.17
30.28	70.98	1007.51	74.28	432.64
4.23	38.44	1016.46	76.64	489
23.65	66.05	1019.6	78.21	442.9
14.41	42.77	1019.84	82.54	465.89
23.48	66.44	1011.28	61.11	443.21
20.48	39.72	1001.61	57.32	455.58
11.21	41.06	1021.75	77	474.03
14.22	42.32	1015.54	77.23	465
15.21	43.5	1021.6	82.06	464.08
18.77	39.54	1009.39	63.35	458.58
26.11	62.44	1010.68	72.59	438.87
20.9	67.07	1005.43	82.85	443.46
12.24	44.9	1020.31	82.22	464.25
20.67	70.02	1010.42	94.09	448.75
26.68	62.91	1012.33	60.78	441.04
17.13	42.86	1014.15	73.6	463.09
7.33	40	1018.96	80.76	478.16
10.63	44.2	1018.63	90.26	477.19
18.23	60.95	1016.74	78.85	455.53
13.19	44.88	1017.61	94.95	467.68
11.54	45	1022.77	80.79	482.34
27.01	43.21	1011.71	77.84	434.09
10.19	37.14	1012.74	73.48	475.01
29.56	51.43	1005.87	59.22	437.93
13.5	44.92	1023.87	87.17	468.85
17.66	44.9	1020.5	71.33	457.11
17.12	68.28	1003.56	94.29	449.94
14.58	42.07	1017.9	86.14	460.66
18.5	47.45	1009.23	83.21	450.22
24.19	47.45	1008.26	64.25	446.3
22.88	50.23	1016.11	63.77	458.08
7.54	37.7	1014.58	78.43	481.56
15.4	41.16	1005.34	80.22	465.16
31.85	69.04	1008.35	46.09	434.79
27.46	66.54	1002.39	67.09	431.81
31.7	69.13	1000.29	46.27	427.95
18.21	41.23	993.11	62.29	457.53
17.9	43.72	1008.64	74.73	452.55
22.89	80.25	1006.38	80.25	446.15
19.55	42.04	1009.99	67.87	466.4
13.43	50.59	1020.38	86.3	469.33
10.02	39.82	1012.86	89.47	482.47
27.1	79.74	1005.43	86.05	431.51
29.56	74.22	1007.45	57.46	432.84
17.35	52.72	1026.31	58.01	463.65
21.59	61.87	1011.18	57.21	446.58
26.04	74.67	1016.68	81.2	433.55
25.5	59.27	1012.92	68.88	442.65
31.38	70.83	1010.35	47.28	431.33
11.01	37.5	1015.08	73.36	474.36
21.17	52.3	1009.67	88.88	444.5
27.06	77.17	1008.71	90.6	432.2
10.95	40.81	1016.19	77.96	474.36
12.41	39.28	1017.08	87.02	473.86
24.63	63.9	1014.53	75.24	440.23
27.19	71.32	1008.97	88.43	437.92
21.45	45.09	1013.83	52.26	453.15
21.95	50.66	1013.92	70.94	455.23
15.33	36.71	1013.99	73.89	468.36
22.86	62.52	1016.23	70.67	447.96
23.34	45.61	1012.73	74.09	455.82
18.87	62.96	1020.55	82.87	455.22
24.54	57.85	1013.02	65.61	444.93
27.49	63.76	1010.09	62.8	436.73
12.53	43.56	1014.8	74.05	469.23
18.7	52.72	1024.84	57.72	458.06
10.07	40.46	1018.65	69.2	470.99
13.26	41.78	1009.77	61.69	467.78
5.79	45.87	1010.23	95.41	480.97
10.55	41.26	1007.77	99.1	473.6
28.51	74.78	1009.84	59.06	434.43
14.64	44.92	1025.54	91.12	462.64
25.32	61.25	1011.56	80.1	436.67
16.69	43.52	1021.78	80.87	460.51
13.25	44.92	1024.11	89.34	469.18
19.64	56.53	1019.6	76.19	447.66
15.75	39.16	1016.31	77.99	468.87
12.42	38.25	1012.76	82.23	472.3
7.74	42.49	1009.07	90.11	481.69
15.11	45.01	1017.01	84.39	462.21
21.19	74.93	1015.75	80.84	443.29
9.15	40.11	1023.82	75.4	475.01
29.86	64.79	1017.37	44.8	439.89
12.54	40.8	1024.56	68.97	479.65
29.63	69.59	1008.3	72.53	438.64
13.33	38.47	1015.42	58.27	466.26
16.63	39.16	1005.85	72.02	460.29
22.58	52.3	1009.04	78.99	445.6
22.5	59.43	1010.31	72.17	441.92
9.45	43.5	1018.89	84.29	476.1
22.63	58.41	1013.69	90.32	445.43
21.49	68.28	1004.68	80.64	438
27.55	65.59	1011.6	63.99	440.53
31.01	67.83	1007.95	43.57	429.46
23.15	58.79	1011.11	82.49	447.71
14.29	39.59	1012.36	92.38	463.13
23.09	63.91	1012.23	83.25	447.9
29	77.54	1011.33	75.13	431.37
9.44	41.4	1027.64	86.22	473.94
18.89	67.71	1003.92	86.12	443.54
32.1	69.98	1013.31	55.84	431.09
30.21	79.74	1006.82	54.03	430.83
9.37	40.11	1024.94	75.03	471.13
25.62	63.13	1013.84	83.49	439.13
31.37	76.86	997.34	62.94	431.03
5.12	40.78	1025.45	96.88	481.28
31.03	74.33	1011.55	63.45	429.35
22.64	70.98	1005.71	95.65	441.99
33.01	69.88	1006.71	53.25	433.5
18.17	52.08	1001.91	100.09	451.06
21.51	65.48	1017.11	72.99	448.65
26.53	63.87	1017.38	48.53	445.11
19.15	44.89	1009.6	74.52	451.09
17.25	39.39	1014.27	67.8	465.74
28.65	70.32	1008.46	58.13	433.45
11.44	40.55	1023.37	88.43	477.68
28.73	68.3	1016.53	55.73	434.15
9.82	39.64	1010.79	69.22	477.93
25.99	63.07	1012.5	64.81	442.16
23.95	66.48	1003.55	73.68	431.87
5.71	40.77	1022.49	87.9	487.48
17.29	44.06	1016.24	77.56	461.38
33.6	74.33	1012.31	35.66	428.62
25.09	69.68	1012.18	91.33	439.77
7.54	38.56	1016.49	69.1	486.76
29.32	63.77	1013.24	55.1	438.09
26.38	66.49	1013.89	43.06	442.38
22.61	44.05	1005.69	76.74	443.45
10.74	40.05	1015.45	87.33	477.93
7.73	39.04	1018.61	68.23	482.39
11.02	41.26	1020.69	92.13	471.93
25.14	60.29	1017.91	53.3	444.5
6.57	39.37	1020.2	77.37	487.94
18.75	44.9	1007.99	75.76	452.77
27.2	77.95	1009.48	78.53	433.39
18.32	42.18	1002.27	95.99	458.46
12.19	40.23	1017.76	81.44	474.92
13.12	39.18	1023.11	64.33	471.44
27.91	64.79	1017.7	48.29	440.53
19.82	41.67	1012.92	51.92	456.87
15.08	37.85	1009.85	85.9	465.58
27.85	66.44	1008.48	77.15	429
6.63	39.42	1024.81	72.58	482.02
24.97	54.2	1012.68	74.25	439.71
12.58	43.67	1012.86	94.01	472.65
31.27	73.77	1003.27	71.48	430.32
22.07	50.78	1008.6	61.33	449.96
23.78	49.3	1003.3	76.56	439.83
14.33	43.41	1015.43	55.4	462.94
19.66	51.43	1010.17	84.19	459.12
13.97	41.16	1020.88	74.88	459.84
17.12	58.95	1016.74	90.41	451.67
28.17	63.13	1012.44	66.61	439.94
29.65	71.25	1001.07	73.97	430.88
25.98	68.12	1011.36	66.86	439
18	52.08	1003.07	100.09	450.85
10.59	41.54	1019.94	73.88	477.05
32	71.85	1008.44	53.59	427.95
12.04	41.58	1018.02	88.91	464.45
26.72	65.61	1014.41	52.01	442.48
28.36	68.08	1013.34	42.82	434.54
30.08	67.25	1017.57	47.77	432.1
14.27	44.34	1018.95	71.44	470.98
22.2	59.21	1017.87	73.34	445.29
15.56	41.1	1003.55	76.92	464.42
26.12	75.6	1017.41	72.31	439.68
26.58	59.39	1014.49	65.87	439.46
9	41.54	1018.83	79.61	484.08
13.15	41.14	1026.72	80.31	461.49
26.82	60.96	1012.25	57.41	449.81
10.7	44.77	1017.8	82.37	484.94
11.02	38.28	1013.51	95.66	472.11
30.06	69.14	1007.5	72.48	436.89
12.99	41.93	1020.25	74.64	472.95
25.38	74.67	1016.61	81.34	435.41
14.94	41.35	1004.82	98.04	466.73
24.6	63.78	1017.25	60.33	448.65
20.76	59.04	1012.51	85.39	448.92
20.46	51.43	1007.31	93.25	444.88
22.72	58.82	1012.54	77.72	448.67
16.73	65.94	1013.79	90.19	453.39
5.71	45.87	1012.04	93.42	482.49
6.72	39.85	1011.84	84.66	489.09
27.52	66.25	1008.21	78.8	438.51
21.4	68.28	1008.2	60.34	450.22
12.09	38.25	1013.61	81.28	469.29
29.71	73.18	1012.35	63.06	427.04
32.53	77.95	1014.76	58.1	434.44
26.21	70.32	1007	78.29	430.4
17.82	49.15	1020.73	70.25	457.35
10.66	37.5	1009.42	95.86	472.86
24.52	56.85	1012.59	54.47	438.89
26.96	62.39	1008.14	73.95	437.41
32.26	73.68	1014.75	60.9	426.48
8.33	38.08	1018.94	73.78	481.89
26.27	58.33	1013.81	60.43	438.82
19.06	44.63	1004.23	84.43	456.54
21.78	47.43	1007.88	66.68	446.79
19.92	63.31	1015.02	82.71	443.54
29.48	64.69	1006.44	64.46	435.09
13.31	40.1	1014.81	82.11	468.74
23.62	45.87	1007.75	58.69	445.55
13.42	48.04	1011.63	99.32	461.36
12.79	44.03	1007.46	95.93	464.35
25.59	61.5	1009.12	68	439.14
6.4	41.17	1019.54	85.37	488.82
28.86	67.9	1006.29	57.19	432.97
12.87	45.51	1015.3	86.67	475.77
21.19	52.3	1008.24	79.19	447.06
7.91	41.79	1021.86	54.92	479.02
3.96	35.47	1016.79	83.81	489.68
8	34.03	1018.98	78.67	487.17
32.45	68.3	1015.26	44.12	431.79
5.79	39.61	1021.64	85.41	489.6
20.55	68.63	1012.5	67.07	453.47
30.55	68.24	1009.43	63.84	426.8
25	68.14	1005.35	57.13	437.67
22.96	68.61	1011.15	76.62	447.18
26.11	47.43	1009.01	56.09	445.36
17.99	43.79	1016.13	75.63	462.4
12.6	40.35	1011.89	80.88	475.42
14.07	45.09	1013.32	94.45	462.69
12.54	40.1	1015.73	84.29	475.02
15.86	43.02	1012.18	40.33	466.6
17.2	40.55	1000.68	72.67	462.55
13.83	40.78	1024.85	73.08	458.85
24.47	70.94	1008.07	81.55	436.29
10.17	41.46	1019.34	83.04	480.13
3.26	41.31	996.32	100	489.38
18.16	39.99	1008.13	68.5	461.16
30.37	67.45	1015.35	45.6	431.38
24.58	48.98	1014.96	38.75	459.79
20.62	43.43	1009.93	64.02	449.07
28.28	61.47	1009.44	60.89	443.12
9.05	36.3	1027.44	74.85	479.43
13.92	43.41	1015.12	61.64	464.76
12.14	45	1023.9	89.2	476.6
21.8	62.39	1007.84	89.04	452.15
20.66	41.54	1014.68	79.7	461.55
15.64	38.28	1014.39	76.93	466.51
22.61	50.32	1008.41	79.4	444.74
10.15	41.46	1019.78	83.56	481.31
16.81	42.42	1008.95	74.25	462.19
32.78	71.22	1005.12	48.77	438.77
14.55	42.74	1027.29	66.64	457.77
7.36	40.07	1017.29	52.55	489.45
10.08	40.72	1022.7	67.3	480.8
21.55	44.57	1006.03	71.54	446.84
12.65	44.34	1019.4	71.45	468.8
6.09	43.65	1020.95	71.15	485.96
32.5	73.68	1014.65	55.72	427.63
22.96	70.79	1005.68	93.93	434.47
31.55	69.75	1010.12	58.36	435.01
18.09	48.92	1010.6	52.11	455.07
22.7	63.56	1014.32	71.76	445
30.32	64.69	1006.35	51.36	436.72
8.64	41.66	1014.14	80.44	481.89
12.22	40.71	1021.25	80.83	477.07
24.14	41.1	1002.1	38.49	450.13
25.52	61.25	1012.84	75.98	435.48
10.99	43.5	1021.1	93.64	469.34
4.96	39.4	1003.58	92.22	486.09
11.47	43.67	1012.68	72.51	475.72
13.18	40.24	1016.81	86.71	469.35
9.2	40.77	1011.88	89.86	479.82
31.01	71.37	1003.4	55.06	430.82
17.34	46.48	1007.18	83.15	452.06
24.49	49.82	1017.09	64.02	451.42
29.23	66.51	1011.11	53.12	439.61
12.17	41.58	1013.89	88.98	463.03
16.53	53.29	1018.64	87.47	463.32
10.11	42.49	1010.22	82.11	483.56
11.82	41.67	1012.94	84.51	476.73
15.66	41.35	1001.68	86.26	463.57
26.37	69.84	1002.71	83.51	428.6
26.13	48.06	1013.5	47.67	440.99
25.44	61.25	1012.57	87.65	441.77
13.03	41.26	1022.17	79.79	466.02
18.83	48.98	1016.33	74.23	453.28
10.06	43.22	1014.1	85.7	473
20.31	69.94	1009.7	86.53	446.87
9.77	39.04	1023.73	76.06	483.87
12.68	40.69	1014.46	79.77	475.37
11.96	43.41	1017.42	79.44	469.34
27.94	49.16	1004.22	35.46	436.75
13.88	39.16	1010.8	75.69	464.37
17.8	43.72	1008.71	78.5	458.92
27.01	67.98	1006.01	67.98	434.65
32.09	79.74	1006.92	61.5	432.85
25.28	67.69	1009.05	68.54	445.34
15.29	41.1	1005.75	85.53	467.99
10.04	41.62	1013.36	95.17	463.87
13.35	39.18	1023.24	61.98	469.34
16.05	38.28	1014.38	73.89	466.75
21.71	65.27	1013.24	63.58	444.91
28.94	62.26	1010.64	50.41	436.04
20.52	43.79	1015.9	68.1	463.93
14.78	54.3	1016.96	68.53	463.75
15.93	25.88	1009.45	72.83	462.7
11.59	40.05	1014.96	86.22	474.46
11.77	40	1021.08	85.08	475.49
32.16	76.2	1008.04	51.74	433.29
22.46	48.41	1008.66	80.85	442.57
22.56	47.43	1006.72	54.82	448.65
10.11	44.85	1014.2	84.81	478.71
26.26	73.06	1009.35	91.65	435.41
11.31	39.61	1018.74	68.9	471.92
31.5	74.16	1011.72	56.42	436.43
27.4	77.24	1007.65	78.13	435.74
5.96	36.25	1029.4	88.63	488.2
10.68	38.38	1020.79	72.33	476.22
14.76	40.71	1017.37	71.07	465.58
23.88	54.2	1012.81	64.52	444.97
10.8	39.28	1010.7	82.62	478.8
23.77	61.87	1009.8	54.83	445.72
25.95	59.14	1016.42	67.03	438.46
21.32	49.02	1008.81	85.81	445.65
13.56	39.18	1023.4	63.82	470.38
8.35	40.46	1019.23	73.26	474.79
15.03	40.66	1016.58	84.08	459.46
11.17	40.27	1009.54	74.56	476.18
8.12	43.02	1013.56	85.26	483.55
18.51	58.46	1017.21	88.1	448.39
11.82	41.26	1020.74	91.14	466.95
20.74	49.69	1010.91	69.1	454.59
25.35	65.18	1012.67	70.36	438.17
13.03	42.86	1014.39	86.25	475.03
32.91	73.68	1014.49	50.62	426.28
19.74	67.71	1007.68	64.02	446.1
5.47	40.62	1018.66	83.61	481.56
32.83	74.33	1011.44	50.42	427.36
22.05	61.27	1019.6	58.83	447.95
16.16	52.05	1013.19	75.37	463.09
14.87	41.23	997.39	82.06	465.01
8.13	39.96	1026.07	95.84	477.12
29.36	78.05	1011.12	64.17	434.29
27.47	69.98	1008.53	58.72	431.11
22.19	60.37	1008.45	92.43	440.75
15.8	41.1	1003	77.36	465.87
7.28	40.67	1020.16	72.7	493.3
22.49	61.47	1009.14	90.23	437.01
11.28	43.41	1017.91	81.03	471.42
21.85	69.94	1010.89	79.4	443
28.04	69.14	1007.16	80.38	436.37
26.31	66.48	1005.93	63.9	432.89
13.69	41.74	1021.19	60.86	471.84
5.53	35.79	1011.19	94.01	484.64
13.93	40.2	1013.41	89.86	466.47
12.57	39.3	1019.57	72.44	473.67
16.94	49.64	1024.43	69.22	459.25
23.24	45.01	1012.21	45.23	457.01
11.89	40.64	1021.29	97.16	476.99
19.73	69.51	1013.14	61.84	450.99
29.29	57.19	1008.3	60.11	435.69
14.24	39.99	1009.3	83.75	466.2
10.73	40.35	1012.27	89.65	477.23
10.06	39.61	1020.69	69.49	478.35
23.42	63.07	1011.72	75.81	444.23
23.72	58.62	1016.65	69.1	447.49
7.73	37.8	1020.71	63.93	483.94
29.77	69.48	1009.8	52.6	432.69
8.23	41.01	1022.89	98.03	474.52
21.77	42.23	1013.03	67.44	462.51
32.33	69.89	1014.18	50.93	427.29
13.5	41.44	1015.72	68.36	471.34
18.71	54.9	1017.12	74.79	456.88
11.65	41.54	1020.09	67.96	476.4
31.31	64.44	1014.24	51.08	438.14
21.94	64.15	1021.2	61.75	453.3
20.31	45.87	1007.89	73.7	449.54
21.71	58.05	1013.07	85.75	449.38
30.31	74.16	1010.69	58.81	436.23
28.32	66.54	1010.28	45.6	436.42
12.51	41.92	1031.21	64.66	468.41
6.48	40.27	1010.55	82.12	486.68
30.68	73.67	1005.63	57.05	429.64
26.97	67.32	1014.35	55.07	439.61
14.02	44.85	1016.54	75.73	469.53
19.26	44.34	1019.45	51.32	467.72
18.25	60.1	1009.72	90.15	456.25
23.39	63.21	1011.91	84.57	448.3
4.31	38.5	1011.75	82.08	492.92
6.77	38.18	1017.8	81.13	484.31
6.94	39.61	1017.74	81.43	480.07
26.75	70.32	1007.61	54.09	433.46
14.12	42.86	1011.84	88.29	471.86
13.97	52.05	1012.05	85.36	463.64
27.06	70.47	1007	72.37	430.82
21.92	49.02	1009.29	88.56	443.31
12.62	34.03	1019.06	74.78	471.55
5.24	38.68	1018.03	78.65	486.67
24.7	58.46	1015.58	68.64	439.7
29.42	74.9	1004.11	64.53	434.66
24.57	72.24	1011.44	79.19	434.93
14.87	41.2	1016.27	70.51	467.01
13.15	40.78	1024.13	79.59	462.3
12.7	39.72	1017.89	62.97	467.77
24.88	52.36	1014.45	68.39	452.31
6.77	39.81	1017.01	87.68	488.27
14.56	40.89	1010.94	79.57	467.53
28.08	59.14	1016.16	58.08	438.83
25.56	74.67	1016.62	76.1	435.81
13.03	39.35	1015.34	79.18	474.02
21.92	61.87	1009.68	58.83	445.52
29.79	62.66	1008.5	48.51	440.27
14.85	40.69	1014.91	72.64	469.3
15.23	37.87	1020.17	85.02	464.02
6.92	43.13	1018.26	89.23	486.36
14.32	71.14	1019.87	79.15	460.02
24.79	50.78	1008.78	61.88	445.3
27.23	44.05	1005.69	58.91	440.2
30.15	67.32	1013.83	32.8	436.92
21.26	50.32	1008.41	87.22	446.22
12.51	43.67	1013.24	91.55	471.96
12.85	41.14	1027.04	86.29	464.86
20.25	55.5	1020.03	69.33	455.13
29.05	75.6	1017.63	51.16	439.14
18.11	44.85	1014.48	48.94	458.85
6.99	40.07	1014.83	54.36	490.11
23.1	60.08	1017.69	65.44	451.01
24.86	72.39	1001.15	90.24	440.85
26.11	69.84	1002.57	84.99	427.45
29.01	70.32	1007.26	60.55	429.23
20.08	62.52	1017.99	75.74	450.98
15.32	45.01	1013.3	83.72	459.31
29.53	71.14	1011.39	53.41	431.97
18.76	52.9	1016.27	64.7	458.26
21.76	47.93	1005.34	86.28	444.77
23.43	54.42	1013.58	70.99	454.86
32.18	69.75	1009.94	52.91	438.26
8.46	40.8	1023.57	81.27	485.06
16.85	52.9	1019.47	81.28	460.84
4.86	39.4	1012.73	91.39	488.63
28.11	69.84	1004.68	67.08	427.33
5.53	40.64	1020.78	97.25	479.88
18.95	42.23	1013.01	79.4	462.73
29.2	70.79	1004.8	63.74	425.2
13.42	40.78	1025.03	77.51	459.04
29.23	69.59	1009	71.41	437.95
18.22	39.63	1005.11	79	465.78
23.69	73.67	1007.19	86.73	437.57
24.24	72.43	1008.02	86.4	436.6
26.58	70.98	1008.96	77.36	434.41
15.45	61.27	1019.87	79.21	456.59
25.3	59.43	1009.15	58.3	442.5
14.02	40.75	1016.05	70.65	470.48
21.99	57.5	1015.87	80.72	446.96
8.46	39.66	1015.14	85.38	484.16
5.42	41.38	1020.77	86.02	491.38
18.13	49.39	1021.29	82.52	458.53
21.95	60.95	1015.22	75.09	450.38
10.91	42.34	1021.83	94.99	470.91
27.17	61.02	1011.38	65.32	437.06
26.02	59.57	1011.16	76.93	446.5
19.72	51.19	1008.51	95.28	446.01
31.35	71.32	1005.99	62.35	434.43
27.83	69.04	1009.69	63.79	443.24
23.15	69.48	1011.07	85.83	436.16
27.16	59.87	1011.78	58.84	446.38
15.91	44.99	1010.93	62.81	459.73
30.36	71.8	1010.9	63.27	437.4
31.4	66.54	1003.55	57.73	425.91
23.26	63.56	1013.64	71.3	446.67
14.1	39.16	1008.19	74.05	464.07
22.68	70.47	1010.86	82.8	441.47
33.12	68.31	1010.3	42.29	441.13
25.72	59.21	1012.37	66.62	437.72
31	71.77	1006.29	48.56	431.07
27.41	63.07	1011.5	55.3	445.02
13.15	42.44	1014.51	99.53	469.34
25.77	68.08	1010.99	73.58	433.46
12	39.96	1011.73	77.77	471.42
21.22	43.43	1010.96	61.07	448.06
15.78	41.16	1008.43	80.25	464.85
23.33	72.99	1009.33	89.41	440.04
22.86	66.48	1003.77	71.22	435.56
22.53	70.98	1005.48	93.95	440.96
18.2	45.01	1013.82	68.14	452.21
11.48	41.14	1027.67	90.5	464.07
[truncated: 7,569 more rows]

## Sheet: Sheet4
AT	V	AP	RH	PE
23.25	71.29	1008.05	71.36	442.21
13.87	42.99	1007.45	81.52	471.12
16.91	43.96	1013.32	79.87	465.86
10.09	37.14	1012.99	72.59	473.66
12.72	40.6	1013.45	86.16	471.23
17.77	52.9	1020.11	81.51	457.98
24.14	63.21	1012.28	89.08	440.74
29.05	75.6	1017.63	51.16	439.14
17.44	45.01	1013.65	75.13	456.08
11.17	44.77	1018.2	79.6	470.85
8.36	38.91	1016.27	88.82	482.09
16.7	36.99	1006.19	89.33	464.7
15.99	43.5	1021.34	73.22	460.7
28.31	50.05	1005.75	50.17	436.75
28.61	52.84	1006	45.73	437.39
10.56	40.22	1005.08	89.71	478.02
12.1	44.77	1019.1	75.85	463.11
33.83	67.9	1005.94	29.86	428.12
21.95	59.43	1010.29	74.67	442.84
32.67	67.83	1007.81	42.16	425.75
22.72	64.15	1021.14	60.34	453.13
22.88	71.73	1010.11	86.96	436.36
11.91	44.45	1021.39	84.49	466.52
18.8	39.72	1001.24	63.8	459.36
19.94	58.96	1014.16	66.27	455.55
14.59	41.23	999.48	86.66	466.83
24.39	60.84	1018.5	61.73	442.72
27.77	62.26	1010.88	66.45	430.19
22.67	60.77	1017.56	79.43	444.43
27.01	67.98	1006.01	67.98	434.65
27.76	72.58	1009.04	84.96	429.25
22.48	67.45	1014.77	63.9	445.55
18.13	39.72	1002.75	58.85	455.81
17.64	57.76	1016.28	85.04	455.75
22.76	57.5	1014.75	74.38	451.7
15.11	56.03	1020.27	89.95	462.65
10.05	37.14	1012.64	75.97	474.16
7.77	41.82	1032.72	72.8	479.4
7.98	40.77	1008.69	98.65	480.72
20.08	62.52	1017.99	75.74	450.98
32.55	73.03	1014.36	44.83	439.81
10.96	41.93	1019.28	87.38	473.28
30.02	68.24	1009.8	65.73	429.5
14.85	40.8	1025.38	53.29	471.78
6.52	39.85	1012.55	86.36	483.01
24.48	64.45	1014.69	51.43	452.82
23.27	64.69	1006.84	70.53	438.08
26.06	58.59	1012.41	55.22	451.47
24.18	59.92	1009.88	79.54	438.85
20.57	42.8	1013.1	75.48	460.43
29.23	77.3	1002.71	65.24	438.05
22.02	69.45	1013.84	75.75	440.26
6.17	39.33	1012.57	93.32	491.54
9.15	41.82	1032.88	75.11	477.78
9.53	38.18	1018.43	75.33	476.54
7.95	37.49	1009.32	80.8	479.78
15.62	40.12	1013.03	96.26	462.59
22.97	42.48	1012.84	64.71	466.7
25.43	70.17	1000.46	87.84	436.43
28.1	61.02	1011.28	59.05	437.5
20.24	56.03	1019.78	59.8	460.76
8.35	40.77	1011.77	90.25	478.82
31.02	70.4	1006.24	77.86	431.37
28.88	54.89	1007.16	46.6	440.99
18.76	56.53	1020.04	86.62	452.5
22.57	63.94	1013.49	81.61	443.58
30.6	72.29	1010.54	41.52	441.5
10.15	41.17	1019.38	82.3	480.71
23.25	70.32	1009.28	86.52	437.96
23.75	66.54	1004.41	85.44	436.57
11.58	41.74	1020.41	74.09	478.06
10.7	44.77	1017.8	82.37	484.94
7.24	38.06	1020.6	85.36	481.83
13.45	42.44	1012.79	83.12	473.96
11.92	43.8	1022.96	60.49	470.33
13.97	41.16	1020.88	74.88	459.84
26.89	70.32	1012.39	87.17	435.56
27.44	52.3	1008.15	58.92	441.75
24.9	58.49	1011.06	65.14	444.19
22.12	47.93	1005.5	84.47	443.41
26.89	56.85	1012.27	43.84	436.44
13.87	38.01	1022.61	84.22	473.39
22.01	60.84	1017.55	83.82	441.9
15.66	41.7	1018	77	452.58
17.94	62.1	1019.81	82.65	453.55
14.81	44.88	1019.1	66.7	464.65
14.77	44.47	1028.38	71.18	464.25
11.92	40.55	1016.91	100.07	472.45
19.68	62.96	1020.41	82.26	453.58
21.11	74.78	1009.71	84.35	442.68
19.66	42.18	1001.51	95.75	454.46
12.71	43.8	1023.15	71.16	466.2
7.64	43.79	1016.17	84.45	486.01
21.38	65.12	1015.73	68.02	448.5
22.69	48.14	1013.7	62.05	448.52
9.37	40.11	1024.94	75.03	471.13
3.4	39.64	1011.1	83.43	459.86
27.18	64.44	1012.81	61.27	440.3
30.12	69.68	1012.89	60.64	436.34
22.28	58.86	1014.08	66.47	446.55
18.78	54.2	1012.05	89.25	448.04
16.58	45.87	1009.66	97.59	457.8
31.1	68.51	1012.99	54.3	428.68
25.16	77.3	1000.73	86.4	439.37
12	39.96	1011.73	77.77	471.42
10.35	40.27	1005.09	92.42	477.8
28.08	59.14	1016.16	58.08	438.83
25.85	70.36	1005.59	78.23	433.06
10.91	39.61	1018.44	64.38	469.42
8.64	41.66	1014.14	80.44	481.89
12.91	42.07	1018.4	86.5	466.05
16.73	43.79	1016.25	73.58	468.87
24.51	65.12	1016.18	62.39	447.46
13.42	40.92	1022.84	75.89	458.49
16.31	42.28	1007.45	77.77	466.49
22.75	57.76	1017.83	66.54	452.33
8.51	40.78	1023.51	89.84	471.11
24.58	71.94	1006.85	89.02	433.99
19.94	61.87	1009.7	66.6	445.97
6.61	38.91	1015.77	92.31	484.32
10.31	37.5	1008.55	99.31	474.16
27.35	61.47	1008.43	70.65	443.67
4.84	38.5	1011.96	81.62	491.23
14.88	41.66	1009.4	67.15	468.55
25.35	72.99	1007.65	84.09	436.29
21.75	65.12	1015.53	66	452.89
15.17	49.15	1021.91	91.73	461.89
28.32	71.32	1008.02	78.82	433.82
18.6	43.56	1013.9	51.16	464.67
19.09	44.63	1019.91	39.32	461.36
28.18	73.88	1005.89	75.41	434.48
9.05	36.3	1027.44	74.85	479.43
25.11	63.21	1012.21	83.58	443.43
18.37	51.86	1018.8	74.3	461.14
15.98	44.68	1018.48	85.94	462.77
9.36	44.03	1010.3	87.2	474.68
13.91	44.58	1021.36	78.98	472.67
19.13	40.79	1004.47	91.7	457.83
33.5	70.8	1008.99	57.24	433.19
8.81	43.56	1014.99	81.5	482.52
27.18	62.66	1009.89	52.83	442.16
15.18	44.2	1019.6	72.45	462.09
20.16	60.1	1011.24	86.23	453.36
11.75	41.2	1012.7	89.86	475.35
12.69	40.75	1016.05	82.92	472.68
29.59	71.77	1006.33	62.35	426.62
22.94	58.05	1012.27	80.12	433.77
22.06	59.21	1012.84	87.06	442.31
24.98	58.98	1010.34	78.56	441.33
23.65	59.92	1010.19	89.53	436.74
25.53	71.85	1009.19	74.7	431.26
31.38	71.32	1009.17	60.42	433.44
9.05	40	1015.48	80.91	472.41
10.22	38.18	1018.01	70.7	474.07
14	40.8	1026.17	54.82	474.87
24.64	72.24	1011.37	80.61	434.54
9.38	40.46	1019.29	75.77	474.1
19.94	65.46	1017.7	68.94	448.67
24.32	65.48	1017.55	59.02	443.31
8.8	42.32	1017.91	86.8	483.88
10.8	41.66	1013.79	81.96	475.51
8.33	38.08	1018.94	73.78	481.89
19.32	44.71	1015.3	28.81	464.38
14.48	46.18	1015.83	92.15	462.3
12.32	41.62	1012.16	88.37	455.71
26.69	70.36	1006.82	68.29	435.04
27.52	74.67	1015.77	72.01	433.56
11.82	41.17	1019.5	55.74	475.61
20.86	67.25	1017.45	81.45	444.5
10.6	41.17	1018.38	87.92	478.47
22.29	43.79	1015.68	41.75	461.23
26.18	69.84	1005.13	72.89	431.69
9.89	40.64	1020.59	98.35	478.13
8.88	36.66	1026.61	76.16	480.2
14.18	42.99	1007.19	73.21	468.35
21.12	47.24	1003.79	70.55	462.41
25.69	73.18	1012.64	86.35	432.82
31.28	75.08	1005.39	49.53	438.63
33.37	71.37	1003.75	45.26	432.67
6.93	39.81	1017.25	87.29	484.98
9.29	34.03	1018.84	74.81	483.74
18.92	44.63	1020.32	47.81	451.64
30.24	68.3	1016.21	48.25	431.82
13.33	40.64	1020.92	91.47	474.07
20.25	57.76	1016.28	77.76	452.66
23.64	70.04	1011.09	83.35	435.21
31.95	67.17	1007.11	61.58	432.6
19.82	63.9	1013.19	78.96	449.61
19.55	56.53	1020.2	78.1	455.56
6.29	40.78	1024.75	96.37	478.29
24.79	67.83	1009.32	61.46	438.36
15.46	44.88	1017.52	93.32	461.2
25.77	63.31	1012.76	65.98	439.98
21.19	55.5	1019.83	65.22	455.93
30.19	64.79	1017.22	42.47	438.41
24.78	50.16	1004.56	70.22	448.51
28	69.05	1000.82	65.24	427.71
30.68	71.25	999.98	68.99	433.47
29.15	69.48	1008.68	55.78	430.54
27.17	67.17	1006.76	81.59	431.73
7.14	41.22	1016.6	97.09	435.58
32.41	72.86	1003.69	58.04	432.75
29.47	71.32	1008.07	67	437.14
19.92	63.31	1015.02	82.71	443.54
11.11	40.55	1023.91	87.12	476.37
28.61	72.29	1011.61	45.33	446.77
20.79	68.28	1001.42	76.77	445.83
28.93	72.99	1007.23	64.41	434.45
10.36	37.83	1005.87	98.56	472.62
21.95	60.95	1015.22	75.09	450.38
33.76	68.51	1011.33	38.35	429.83
17.36	41.23	998.08	63.46	459.1
22.5	64.69	1007.03	74.92	440.73
26.64	73.56	1004.98	93.31	432.93
21.34	59.8	1016.92	77.06	450.74
13.31	41.26	1020.83	79.55	462.87
13.9	39.59	1011.84	94.74	465
4.78	42.85	1013.07	94.72	479.09
28.29	68.67	1005.46	69.22	436.4
10.23	42.32	1017.53	89.93	473.59
8.58	40.72	1022.04	87.55	480.96
22.05	48.14	1015.81	69.94	447.37
10.23	41.46	1018.89	83.06	479.48
9.22	40.92	1021.83	85.43	474.51
5.76	40.07	1013.22	62.99	494.67
29.23	69.59	1009	71.41	437.95
21.83	62.91	1011.07	91.34	443.76
29.27	66.85	1011.11	63.25	440.98
13.72	49.83	1006.88	89.49	463.65
17.35	39.72	1003	64.62	459.83
11.61	41.17	1019.57	58.82	476.81
22.33	71.94	1011.06	82.85	441.85
25.51	64.27	1013.28	61.85	444.76
7.92	42.28	1008.55	81.68	484.75
27.01	65.06	1013.16	53.02	439.81
27.83	59.57	1011.22	71.05	443.85
26.55	73.67	1005.74	79.41	433.44
23.26	58.2	1016.72	57.98	446.87
11.57	41.54	1020.13	69.14	476.89
12.33	39.85	1012.53	66.04	479.32
27.21	64.05	1010.08	76.69	442.37
25.79	67.17	1007.89	81.38	440.75
8.37	40.92	1021.82	86.03	476.02
10.94	39.04	1021.81	86.02	479.2
27.63	64.96	1006.3	75.38	434.22
7.25	41.14	1024.99	95.85	477.45
21.7	60.77	1018.07	88.15	444.66
26.63	43.77	1011.33	49.3	440.95
10.27	42.34	1022.69	92.78	474.55
8.62	39.66	1015.18	89.59	482.99
9.11	40.02	1031.1	83.02	479.03
21.47	60.77	1018.06	85.73	444.02
32.07	70.94	1006.91	49.9	432.33
19.44	59.21	1018.5	88.35	448.04
16.73	45	1023.44	60.68	467.08
14.16	39.28	1015.63	77.29	471.27
18.89	67.71	1003.92	86.12	443.54
26.05	44.89	1009.83	56.36	443.18
22.6	69.84	1006.37	79.59	435.13
19.79	60.1	1010.47	84.04	452.41
27.06	77.17	1008.71	90.6	432.2
9.35	44.03	1011.02	88.11	476.25
24.66	48.78	1018.39	71.79	449.11
3.96	35.47	1016.79	83.81	489.68
17.9	67.71	1004.3	89.59	449.73
23.43	51.43	1011.31	73.55	444.09
27.74	70.32	1009.58	50.29	433.47
17.69	46.36	1019.55	86.64	462.81
24.22	49.82	1014.61	66.82	452.2
26.69	59.21	1012.55	57.59	436.33
23.58	49.3	1003.8	74.62	440.44
7.94	35.77	1017.04	63.22	480.38
19.65	51.3	1014.81	90.23	452.5
26.55	60.23	1009.88	79.54	438.95
30.45	43.21	1011.35	63.59	438.68
6.06	41.17	1019.67	84.7	489.62
19.64	48.06	1014.81	74.96	455.27
11.37	39.16	1016.54	87.05	480.54
24.35	58.79	1010.13	72.1	448.19
12.04	38.25	1013.08	82.45	472.13
30.89	74.87	1008.99	56.58	432.68
14.67	71.14	1019.84	77.72	458.8
24.44	59.14	1016.74	71.82	443.5
21.7	64.44	1014.95	73.33	448.51
26.65	74.16	1008.27	94.54	431.47
17.02	44.85	1014.38	62.66	459.98
26.6	61.41	1012.35	54.42	451.4
11.1	40	1021.29	86.58	477.2
25.74	59.07	1007.37	79.89	441.05
29.42	79.74	1007.24	61.26	437.61
25.95	73.77	1001.35	92.67	432.21
28.85	66.54	1010.73	43.27	437.79
31.74	72.58	1007.26	59.58	425.12
14.51	49.83	1006.27	91.65	460.45
17.34	44.06	1015.84	74.88	458.5
13.18	43.72	1010.59	99.09	464.7
11.2	35.76	1019.24	64.59	473.33
28.26	65.34	1014.56	43.4	441.03
21.67	61.45	1010.84	92.19	443.82
25.95	59.92	1010.05	76.05	443.93
10.41	36.71	1022.02	84.56	474.2
13.38	40.89	1010.48	92.55	472.15
27.36	63.31	1013.7	51.58	440.4
11.52	40.75	1016.23	85.18	477.19
14.85	40.69	1014.91	72.64	469.3
16.3	39.63	1004.64	85.61	464.11
17.18	63.09	1020.67	93.58	451.37
19.94	56.53	1020.48	76.43	453.8
21.9	63.13	1011.54	81.83	447.4
26.47	47.43	1009.09	54.94	439.4
24.77	57.17	1010.66	73	441.12
22.79	68.63	1012.99	55.78	446.16
25.52	71.98	1006.89	86.94	433.42
21.19	58.86	1014.19	68.96	452.43
12.34	40.1	1015.77	92.26	470.92
22.19	48.78	1017.84	76.01	446.51
12.08	40.75	1015.84	86.9	476.84
16.85	42.24	1017.43	66.01	472.63
23.62	56.85	1011.11	64.44	442.96
13.87	45.08	1024.42	81.69	465.48
7.87	41.17	1020.33	77.77	486.2
17.54	44.58	1016.56	79	465.51
26.3	67.07	1006.26	63.79	433.72
20.95	70.72	1009.96	87.73	445.66
13.11	42.99	1007.6	97	472.84
11.48	37.5	1014.38	69.75	472.9
23.2	48.41	1008.64	80.92	444.69
16.14	44.71	1014.83	39.41	468.88
18.58	64.45	1009.68	67.57	444.28
30.05	69.34	1008.26	61.5	436.82
25.52	69.75	1010.36	90.06	435.12
16.62	52.05	1011.96	67.81	457.89
10.33	41.44	1015.24	86.72	478.79
27.22	67.9	1005.73	57.29	441.22
15.94	41.76	1023.32	67.17	462.44
16.81	38.52	1018.26	75.21	459.01
29.09	75.33	1001.61	71.06	433.29
28.83	64.96	1000.05	63.57	429.13
11.87	36.43	1023.42	79.5	474.17
32.81	71.32	1007.69	47.29	434.38
22.43	69.84	1006.94	75.54	436.19
12.05	40.55	1016.63	100.14	472.19
13.32	44.9	1007.72	78.64	466.3
24.66	57.43	1013.17	71.82	445.41
23.5	54.42	1012.31	68.29	455.38
26.26	65.06	1013.58	52.72	440.92
5.5	39.04	1021.46	78.91	478.65
6.42	35.57	1025.58	79.63	485.86
19.24	58.33	1013.65	85.47	449.26
20.51	68.08	1012.73	78.05	445.96
29.23	68.14	1004.31	81.46	428.87
25.18	47.93	1002.92	60.33	441.29
18.07	44.92	1024.72	69.15	457.53
23.56	66.49	1012.21	53.86	441.92
28.55	65.27	1013.34	48.95	437.62
23.82	48.92	1010.48	44.45	446.85
11.87	40.55	1019.06	94.11	473.79
20.86	51.3	1012.03	92.46	449.67
27.31	65.12	1016.05	45.98	440.06
18.2	39.63	1005.35	79.05	468.49
25.68	67.79	1010.66	69.51	449.04
24.85	70.09	1006.56	70.09	439.96
27.39	69.14	1008.82	78.35	435.22
16.71	42.99	1007.72	75.35	465.09
20.43	63.09	1016.46	91.78	445.58
27.21	66.49	1013.57	40.11	439.04
20.53	54.9	1016.61	61.28	454.67
18.77	50.66	1014.89	87.34	457.07
24.49	70.79	1005.51	88.65	430.54
27.75	77.24	1007.48	78.37	433.57
16.12	45.87	1008.15	86.12	457.41
26.41	60.93	1007.16	66.02	436.71
25	59.43	1007.84	68.91	438.28
28.6	71.22	1003.15	58.33	443.01
18.12	50.16	1009.82	100.09	453.29
12.5	45.51	1015.8	82.82	469.69
23.16	57.69	1007.91	84.7	438.29
16.77	42.28	1007.53	73.19	465.52
22.83	58.62	1017.82	69.76	450.96
14.66	41.76	1022.12	78.13	463.6
16.57	63.31	1016.19	81.02	454.78
24.81	59.87	1018.56	61.18	444.89
16.96	52.9	1019.61	81.86	460.2
27.67	71.64	1004.41	78.14	433.29
22.2	57.17	1009.82	78.43	447.75
25.76	71.06	1007.93	90.4	433.75
24.2	60.95	1014.82	59.42	448.43
16.98	43.99	1021.65	81.17	456.07
22.68	70.47	1010.86	82.8	441.47
15.95	49.25	1019.04	88.51	463.4
23.57	66.75	1018.06	80.19	439.71
4.88	40.27	1012.66	74.51	491.29
21.23	57.32	1010.99	75.17	443.87
19.15	59.21	1018.41	88.9	450.26
27.1	73.21	1002.97	89.68	430.87
16.69	53.82	1015.39	63.62	458.96
24.31	58.62	1017.29	64.44	449.12
29.38	73.42	1011.49	54.96	445.42
24.4	69.94	1005.75	58.1	438.76
32.21	68.3	1014.94	49.38	429.66
27.55	63.13	1012.92	71.29	440.75
14.26	44.2	1019.81	76.46	462.87
22	59.54	1004.55	95.25	439.37
13.55	40.1	1014.57	81.48	469.57
27.71	66.93	1016.85	58.77	447.06
24.93	70.32	1007.34	61.25	436.03
20.57	63.78	1016.76	74	449.93
16.7	46.18	1011.2	96.84	456.2
14.09	45.87	1009.05	84.09	465.6
15.11	45.01	1017.01	84.39	462.21
13.92	41.16	1000.98	83.89	454.15
13.43	50.59	1020.38	86.3	469.33
19.89	68.08	1012.65	80.25	448.71
21.6	43.43	1010.28	61.87	446.4
15.29	25.88	1009.21	66	464.25
8.48	40.05	1015.89	90.25	483.5
19.15	56.53	1019.95	84.1	456.4
11.23	41.17	1019.36	56.85	475.85
12.31	41.06	1021.19	74.38	475.76
20.11	50.78	1008.73	93.24	447.42
14.28	37.2	1013.96	82.71	467.44
21.1	62.66	1011.19	83.49	448.8
29.7	57.35	1005.63	57.35	433.27
29.39	71.14	1010.97	53.88	430.5
27.08	62.91	1011.9	62.58	442.91
4.97	40.64	1020.91	94.28	485.43
33.18	72.29	1009.51	58.35	435.26
18.81	52.08	1004.43	99.6	450.87
8.77	40.77	1011.54	89.58	480.56
32.48	69.89	1013.98	46.39	434.13
29.53	71.14	1011.39	53.41	431.97
12.87	39.3	1020.64	74.38	467.54
19.78	63.09	1019.01	78.39	448.34
23.64	58.49	1011.4	74.2	445.75
18.21	49.69	1013.54	80.16	454.25
25.11	58.79	1015.99	60.55	442.34
28.97	67.9	1006.19	65.81	434.7
25.56	70.32	1009.07	90.63	433.72
29.17	73.17	1009.87	60.97	432.07
21.3	66.86	1013.04	55.43	450.56
13.69	44.85	1016.89	79.87	470.78
27.24	69.13	1009.28	70.85	432.36
27.24	77.17	1009.37	81.51	439.12
5.21	41.31	1003.51	91.23	486.46
18.91	43.14	1013.56	58.34	460.19
26.51	50.05	1006.75	65.34	440.22
11.78	39.96	1011.37	82.95	472.79
26.38	49.5	1012.82	37.19	457.81
13.93	39.64	1011.8	82.64	470.84
20.89	68.63	1012.6	69.52	452.05
8.51	41.26	1023.17	87.79	477.51
30.85	67.45	1014.53	32.99	430.8
7.73	39.04	1018.61	68.23	482.39
18.32	42.28	1007.86	45.62	460.27
29.25	69.98	1010.74	57.42	430.45
11.45	40.8	1027.74	78.6	476.28
18.23	45.01	1012.24	73.86	454.06
6.17	40.07	1013.7	58.99	495.21
21.52	50.66	1013.56	74.33	455.71
17.48	46.21	1014.02	80.78	455.35
14.87	35.71	1015.53	57.7	468.75
23.33	72.99	1009.33	89.41	440.04
16.14	44.63	1019.44	47.85	463.5
28.56	74.22	1007.45	69.6	434.54
31.56	66.44	1008.91	64.16	430.11
17.14	58.16	1018.59	77.22	458.61
22.16	64.63	1020.81	68.47	451.86
26.94	68.24	1010.49	76.58	430.34
24.27	61.47	1007.84	80.85	448.66
11.37	41.5	1013.57	88.82	475.94
13.74	45.08	1024.97	84.79	466.79
25.89	48.41	1008.59	65.38	442.12
22.79	50.78	1008.65	58.39	447.12
18.36	51.43	1010.57	90.17	459.8
15.23	37.87	1020.17	85.02	464.02
31.85	68.3	1014.76	47.06	428.72
32.31	66.44	1009.6	63.92	428.44
21.27	57.5	1014.53	80.76	453.34
24.92	63.86	1019.19	59.24	440.93
31.67	69.89	1013.88	39.33	426.35
25.04	66.48	1004.12	63.01	433.83
32.13	69.98	1013.3	55.85	431.84
10.57	36.71	1022.11	82.39	472.62
11.41	39.61	1018.69	69.44	467.19
26.31	68.51	1013.26	68.66	435.91
25.89	48.41	1008.49	68.58	440.92
19.69	56.65	1020.86	73.41	455.32
21.43	46.97	1013.94	61.25	457.68
9.61	44.03	1008.3	91.36	473.54
25.42	75.6	1017.39	77.63	438.24
23.05	68.67	1006.69	76.43	447.34
10.66	41.93	1016.12	94.16	479.61
14.03	44.88	1019.6	57.63	465.51
33.4	69.98	1013.29	47.78	432.44
20.28	57.25	1010.12	88.42	452.03
10.7	36.18	1018.16	63.15	475.08
22.76	58.96	1013.85	55.95	454.05
23.49	73.18	1012.4	90.05	437.01
18.68	53.29	1018.16	75.01	459.89
25.87	67.79	1011.16	79.88	445.87
31.55	69.75	1010.12	58.36	435.01
23.26	63.56	1013.64	71.3	446.67
27.17	73.5	1010.36	73.29	435.22
22.31	43.43	1010.64	56.44	449.67
6.41	40.81	1026.57	93.51	484.49
25.02	60.29	1017.49	54.75	445.61
12.22	41.2	1016.81	81.22	474.96
22.59	59.43	1005.85	84.02	442
12.19	41.06	1021.35	74.98	474.63
22.72	62.4	1010.28	80.79	445.22
22.15	43.77	1010.81	60.08	448.46
18.23	60.95	1016.74	78.85	455.53
17.16	58.86	1016.4	86.39	453.76
22.86	58.96	1014.03	54.96	451.82
28.24	65.27	1013.43	48.74	439.36
12.57	39.3	1019.57	72.44	473.67
29.41	59.27	1011.36	52.37	441.99
11.15	40.64	1020.65	97.95	477.79
23.76	51.19	1009.69	70.87	442.9
14.72	38.91	1015.17	61.75	468.87
25.97	68.12	1013.11	61.97	437.11
29.91	74.9	1003.36	69.34	434.93
19.35	50.12	1005.43	100.1	447.43
30.98	67.45	1015.18	45.4	433.59
20.31	69.94	1009.7	86.53	446.87
17.44	44.88	1018.05	68.35	465.72
22.55	69.84	1006.57	76.29	438.54
24.2	57.85	1013.05	70.29	446.87
24.67	58.05	1011.31	69.95	444.57
31.16	64.96	1001.71	44.85	425.82
20.48	39.72	1001.61	57.32	455.58
6.93	41.14	1027.18	84.67	479.06
25.14	60.37	1006.63	77.17	438.39
12.17	49.83	1008.05	96.44	469.52
19.73	49.69	1007.78	73.02	454.28
18.86	51.43	1010.27	86	446.91
11.36	38.25	1013.22	86.16	473.55
15.19	41.43	1011.34	89.67	470.41
25.79	59.43	1008.61	64.3	435.51
22.64	70.98	1005.71	95.65	441.99
23.48	49.16	1002.7	70.22	445.72
21.18	70.02	1010.27	96.46	442.51
15.85	49.69	1015.33	89.24	469.4
12.5	41.38	1021.87	57.59	474.4
20.37	54.9	1016.94	65.86	453.94
14.59	42.44	1012.7	83.92	470.86
14.81	39.58	1011.62	73.64	467.32
24.06	71.25	1002.39	92.18	438.85
22.08	41.54	1014.21	73.73	458.74
16.69	50.9	1013.21	84.98	460.75
31.27	73.91	1003.72	68.92	430.59
13.91	40.24	1017.03	85.93	466.24
27.01	63.78	1016.72	47.89	442.6
16.39	41.67	1012.96	61.07	467.68
5.72	40.81	1025.78	92.46	487.8
7.39	39.85	1011.63	83.61	487.84
13.61	38.47	1015.1	54.98	466.51
22.09	65.59	1015.54	72.44	447.28
13.42	40.78	1025.03	77.51	459.04
21.45	60.84	1017.86	82.8	444.99
21.71	65.27	1013.24	63.58	444.91
29.73	67.25	1017.64	37.79	439.06
11.02	39.96	1025.64	93.58	467.41
27.83	69.04	1009.69	63.79	443.24
24.57	49.82	1016.82	65.25	452.3
16	43.34	1013.89	78.39	462.33
22.03	64.79	1017.95	76.2	450.25
14.87	41.23	997.39	82.06	465.01
25.93	66.56	1004.97	76.35	433.25
8.76	40.96	1025.21	90.72	483.79
22.87	74.22	1009.36	93.05	438.67
25.59	65.46	1014.47	37.89	444.9
13.09	43.02	1013.17	46.73	470.14
28.39	65.51	1014.52	66.48	438.78
21.71	60.27	1015.74	89.76	441.19
31.37	76.86	997.34	62.94	431.03
30.93	61.5	1009.81	41.46	437.35
11.09	40.43	1025.47	74.97	490.96
18.31	52.9	1015.99	66.14	459.61
28.24	65.74	1013.4	64.87	438.47
6.65	40.77	1021.79	88.84	482.9
13.69	41.74	1021.19	60.86	471.84
6.75	39.37	1020.26	70.99	486.26
20.12	58.12	1015.47	79.38	453.33
27.22	69.04	1008.89	70.62	440.85
13.34	41.79	1011.48	86.66	461.12
20.6	44.58	1017.67	48.36	466.2
16.85	39.64	1008.82	80.81	464.2
25.07	77.95	1012.87	83	438.55
23.72	66.48	1003.61	73.75	436.62
17.23	41.1	1002.45	68.88	464.18
22.63	57.17	1009.83	77.43	433.54
19.43	52.9	1017.16	67.41	458.46
24.84	59.22	1013.18	83.08	442.7
9.26	44.68	1023.22	91.44	478.82
16.81	42.42	1008.95	74.25	462.19
28.19	68.08	1013.41	43.93	436.43
30.74	69.59	1008.69	68.04	437.81
21.18	44.57	1007.27	73.67	449.93
28.31	64.79	1016.58	60.88	440.96
28.12	73.42	1011.49	80.16	435.46
8.28	40.77	1011.55	89.79	480.15
24.73	65.34	1015.42	52.8	446.92
25.6	71.73	1010.15	68.99	436.7
23.94	51.95	1008.61	73.42	448.67
29.05	71.85	1008.6	78.69	428.39
11.92	40.62	1015.91	55.4	464.9
31.01	74.16	1010.89	56.52	434.64
7.11	43.13	1018.96	87.82	486.11
17.37	41.23	998.79	68.44	461.08
14.85	45.87	1009.37	84.65	462.67
33.74	69.98	1012.51	43.3	425.35
17.44	44.89	1009.9	80.54	457.67
27.61	49.16	1005.01	35.63	441.18
25.31	49.82	1014.62	62.15	453.05
12.74	41.5	1012.94	86.28	469.92
27.69	65.34	1014.31	46.59	442.84
25.56	58.82	1010.44	70.23	441
30.28	74.67	1016.45	55.76	428.27
15.55	40.66	1016.21	88.5	457.53
24.35	66.49	1012.48	62.12	439.15
33.59	79.05	1007.79	63.55	436.51
29.05	69.71	1009.03	64.25	434.05
23.84	49.21	1013.85	50.36	447.09
25.67	74.78	1010.24	68.87	440.48
29.33	64.84	1010.76	53.32	443.15
28.01	51.43	1011.6	49.2	449.82
27.35	60.75	1008.98	67.56	435.14
9.27	42.02	1004.29	95.05	474.93
16.73	65.94	1013.79	90.19	453.39
6.25	40.02	1032.14	80.22	481.38
6.14	40.62	1015.71	86.51	481.66
4.81	42.85	1013.96	86.94	479.8
23.64	71.25	1004.92	93.87	442.26
23.31	68.63	1014.73	51.57	448.2
26.45	73.5	1010.31	74.33	433.44
13.42	41.74	1020.96	61.8	473.45
22.07	48.41	1008.71	81.29	444.01
18.87	52.08	1005.25	99.19	449.61
7.34	40.72	1023.01	80.08	483.92
14.91	43.34	1015.15	81.56	461.27
20.56	64.45	1012.24	53.09	458.97
11.01	37.5	1015.08	73.36	474.36
24.65	64.63	1020.52	53.45	446.04
11.17	40.27	1009.54	74.56	476.18
14.91	40.73	1017.44	86.91	458.99
20.36	66.05	1015.86	87.19	450.23
8.86	40.8	1028.18	91	483.36
23.82	64.15	1020.96	60.11	447.37
19.35	64.15	1021.37	68.53	457.74
28.78	64.96	999.75	56.43	432.66
12.57	39.18	1023.09	77.28	471.87
11.74	43.56	1015.14	70.72	477.5
9.44	39.82	1013.26	91.55	483.18
19.74	67.71	1007.68	64.02	446.1
14.6	44.84	1023.58	88.21	464.88
26.84	70.36	1007.41	71.47	442.17
13.24	54.3	1017.05	81.99	467.81
20.17	50.66	1014.38	82.09	454.79
10.1	41.17	1019.18	84.87	479.95
18.4	50.16	1011.51	98.07	453.78
23.18	51.43	1011.56	81.83	449.94
7.91	37.8	1020.59	61	483.49
12.64	41.26	1020.79	83.66	465.78
19.83	59.44	1012.98	91.24	446.15
23.42	63.07	1011.72	75.81	444.23
26.39	49.16	1005.68	56.18	442.87
28.8	70.02	1010.76	49.61	435.45
31.54	77.24	1007.83	62.98	430.07
28.46	49.16	1004.61	38.1	438.02
19.95	58.46	1017.45	89.46	447.1
29.05	68.24	1007.88	42.67	433.92
6.86	41.38	1021.35	90.78	487.49
30.57	58.9	1004.54	54.37	438.49
21.12	62.96	1020.83	69.96	454.65
9.7	37.14	1012.79	75.2	475.77
13.56	39.18	1023.4	63.82	470.38
11.21	44.03	1007.95	93.03	471.79
23.09	63.91	1012.23	83.25	447.9
21.08	63.13	1013.53	98	443.51
9.53	38.38	1020.49	80.08	478.03
30.73	69.89	1015	58.9	426.79
23.76	58.82	1011.75	77.34	444.57
13.41	39.35	1015.1	79.32	471.85
20.24	56.65	1020.72	62.9	455.49
16.76	43.77	1012.25	77.95	457
26.85	66.86	1006.78	69.4	438.26
12.62	40.92	1021.85	81.41	465.68
7.57	41.14	1028.23	87.97	477.8
22.82	60.08	1017.95	65.71	450.86
17.77	43.72	1009.01	77.7	456.34
13.07	45.51	1015.22	78.65	460.14
21.05	61.87	1009.69	62.81	449.05
30.83	71.58	1009.92	48.8	432.11
23.69	63.77	1013.39	79.5	444.07
24.12	58.66	1011.55	58.96	450.69
19.5	65.12	1015.53	73.87	453.99
30.1	66.25	1009.38	65.41	434.99
20.8	50.9	1012.07	73.16	457
22.16	65.48	1017.22	70.51	446
24.8	59.87	1018.79	60.79	441
6.22	39.85	1012.05	86.88	443.73
16.38	45.64	1020.47	89.28	462.58
11.06	41.16	1018.52	89.14	467.46
29.17	67.45	1014.1	46.85	435.08
14.68	41.23	998.43	83.71	469.25
32.63	73.88	1005.64	52.56	435.75
32	73.17	1009.94	40.48	428.69
13.94	41.58	1020.76	68.22	463.07
13.42	40.35	1011.2	77	472.57
16.94	50.59	1018.75	94.22	460.64
28.13	68.12	1012.6	44.71	435.85
22.27	50.05	1007.1	89.34	442.24
29.54	69.48	1008.91	56.07	427.82
11.64	38.25	1013.33	85.79	472.34
13.78	44.47	1027.94	71.09	467.22
10.76	40.43	1025.98	79.65	490.78
10.62	39.64	1010.65	62.15	477.07
32.07	71.29	1008.43	44.95	426.96
9.66	41.06	1021.21	84.7	482.2
27.08	66.05	1017.91	59.1	441.16
18.96	50.16	1010.72	100.09	451.2
24.66	66.49	1010.83	70.06	438.01
24.9	67.25	1017.77	66.17	433.71
16.86	39.63	1004.47	83.5	466.68
9.23	39.66	1019.44	76.11	481.77
30.31	74.16	1010.69	58.81	436.23
24.23	59.04	1011.91	71.79	443.06
23.63	73.18	1012.29	88.81	437.7
20.85	48.7	1007.11	87.2	449.57
15.97	45.01	1016.58	83.24	456.91
20.64	61.86	1012.81	99.97	447.14
7.67	41.66	1016.25	77	485.03
24.2	64.33	1011.15	84.23	442.78
15.91	38.62	1016.2	63.63	462.25
24.51	62.08	1022.58	57.44	447.04
21.3	48.92	1010.92	65.09	447.89
28.29	69.13	1009.29	58.18	429.28
10.79	39.82	1012.89	88.25	479.92
19.76	58.79	1017.37	89.09	449.76
21.96	58.79	1012.1	88.74	447.31
23.07	57.5	1015.7	75.47	447.49
20.12	56.53	1020.34	75.59	454.54
30.75	73.88	1005.62	57.95	436.97
28.24	71.58	1010.1	67.92	434.01
29.13	62.26	1010.51	52.94	436.37
24.33	60.32	1015.49	59.95	445.36
10.8	39.28	1010.7	82.62	478.8
9.29	39.04	1022.72	74.29	482.55
25.85	75.08	1006.24	57.73	444.63
21.33	60.1	1010.97	78.36	451.95
20.57	44.78	1008.89	38.78	465.69
16.75	36.99	1006.42	87.18	464.18
20.3	48.41	1007.48	89.66	446.68
29.86	59.57	1011.24	64.02	439.44
30.4	71.97	1008.42	76.28	430.23
14.22	40.83	1009.2	81.32	469.75
8.55	35.77	1016.15	73.32	481.44
28.32	66.54	1010.28	45.6	436.42
28.8	71.58	1010.51	59.87	434.82
25.42	69.71	1009.29	82.5	435.59
29.67	73.67	1006.48	64.98	429.28
25.2	61.08	1013.04	74.28	447.09
10.33	40.62	1017.41	64.22	473.16
34.43	68.51	1010.17	34.09	431.39
14.02	44.47	1028.02	68.97	465.93
31.63	69.59	1008.66	61.81	436.89
28.44	69.4	1003.98	73.51	433.44
10.94	39.69	1004.5	86.29	459.69
31.53	70.94	1007.11	50.04	431.84
7.53	43.65	1018.58	64.85	479.15
26.98	43.77	1010.95	40.8	446.05
25.13	68.63	1013.57	43.44	446.36
27.03	65.12	1015.94	45.1	441.62
9.95	43.56	1014.85	82.62	477.88
31.1	69.51	1010.84	45.4	429.74
31.81	66.44	1011.21	53.55	426.84
29.05	64.84	1011.1	51.39	442.58
25.34	69.48	1008.4	74.79	433.81
21.53	52.84	1005.06	88.22	444.04
6.67	39.37	1019.99	75.61	486.84
23.63	60.37	1005	81.66	440.74
12.58	39.72	1017.85	57.74	471.24
21.38	49.21	1012.49	53.77	449.66
24.19	46.93	1013.4	49.39	446.3
28.9	68.12	1011.87	46.56	438.53
11.94	39.28	1017.04	89.88	475.59
12.24	40.96	1023.22	78.74	475.32
27.16	59.87	1011.78	58.84	446.38
17.81	45	1022.32	43.84	471
11.68	40.55	1017.31	99.82	473.51
15.14	41.93	1020.95	61.26	469.68
8.27	37.7	1015.09	73.64	479.16
24.65	52.36	1014.76	66.63	455.68
26.36	73.68	1013.99	86.44	430.39
28.62	70.94	1007.38	53	432.71
26.63	74.16	1009.72	83.26	436.03
24.26	47.93	1003.87	70.44	439.16
12.03	40.1	1015.32	85.39	474.94
6.57	43.65	1018.24	74.47	481.46
14.45	39.58	1012.41	79	467.62
31.01	69.04	1009.14	52.81	442.07
27.54	68.27	1008.12	56.42	433
29.42	56.9	1006.51	53.6	439.51
23.39	73.5	1011.37	88.48	441.18
14.93	41.79	1008.88	81.48	456.75
29.22	75.23	1010.49	48.73	438.57
32.39	74.16	1008.53	61.09	431.17
17.98	59.15	1012.09	83.03	451.97
6.54	39.33	1011.54	93.69	491.16
31.11	72.25	1012.34	44.45	434.22
23.74	52.3	1008.88	76.34	444.4
19.72	44.78	1009.27	39.18	464.54
23.78	60.27	1018.02	78.06	441.56
26.89	49.16	1003.84	41.22	442.39
30.68	73.67	1005.63	57.05	429.64
11.73	40.64	1020.68	96.98	477.06
19.64	56.65	1020.79	73.88	456.03
4.15	39.9	1007.62	95.69	489.8
29.51	76.09	1007.39	71.5	432.45
15.43	41.1	1005.2	85.06	467.21
23.98	50.32	1008.41	67.75	443.45
22.22	59.14	1017.32	83.41	442.31
28.15	72.24	1010.88	62.39	431.75
15.62	41.76	1023.82	66.17	459.72
28.76	51.43	1011.88	49.79	449.98
13.96	40.92	1022.65	73.08	460.95
26.47	69.51	1009.51	65.02	433.89
15.24	39.39	1013.01	74.24	469.79
28.82	77.24	1008.35	78.93	433.69
11.02	41.17	1018.18	86.86	477.62
11.01	40.22	1011.13	83.09	476.69
13.85	48.92	1011.68	79.24	462.38
24.54	57.85	1013.02	65.61	444.93
23.51	70.04	1011.02	81.39	435.78
19.51	44.05	1008.52	78.38	451.7
19.3	65.59	1014.07	81.98	452.76
23.78	58.86	1015.7	62.95	443.79
28.63	66.56	1005.88	64.73	427.35
21.32	49.02	1008.81	85.81	445.65
28.37	63.31	1013.18	49.02	437.64
23.09	70.02	1010.58	77.85	443.27
6.91	39.37	1019.58	71.02	488.2
22.25	66.54	1004.64	89.15	437.19
15.5	49.25	1021.41	77.92	453.99
26.88	73.56	1004.85	94.36	430.63
24.34	48.78	1018	73.44	448.54
14.55	42.74	1028.41	70.09	465.81
12.75	44.03	1007.29	89.46	465.86
6.11	38.68	1017.53	79.23	482.97
26.35	59.44	1012.16	63.73	443.73
26.52	43.77	1011.49	46.98	440.31
17.7	50.88	1015.44	89.57	456.78
27.3	57.19	1008.08	63.48	438.65
30.68	71.8	1010.81	61.4	435.4
26.56	52.3	1007.4	62.04	439.25
14.87	38.28	1014.65	80.24	467.29
31.03	69.98	1011.33	52.16	436.13
11.41	41.54	1019.94	66.49	477.89
3.74	35.19	1018.58	98.84	490.5
14.52	44.84	1023.51	88.51	466.88
15.5	39.16	1016.24	78.13	469.52
10.02	38.18	1017.43	68.4	476.83
20.04	49.39	1020.62	78.84	449.63
27.3	65.12	1016.24	44.87	442.78
11.21	39.85	1013.01	75.55	480.61
22.98	73.17	1011.94	90.13	438.5
25.53	57.17	1010	72.57	442.12
20.21	65.06	1016.46	73.36	451.46
25.88	71.73	1010.01	72.8	430.86
28.62	69.98	1013.3	68.53	432.11
7.28	38.56	1018.96	67.98	485.57
13.82	42.32	1016.32	81.19	463.06
16.39	58.59	1014.58	90.34	455.05
30.95	73.06	1008.86	74.86	431.77
5.01	39.4	1003.69	91.9	475.34
31.03	74.33	1011.55	63.45	429.35
6.84	41.06	1021.04	89.59	489.96
8.66	41.01	1022.51	98.55	472.16
22.21	69.71	1009.69	96.85	440.14
11.77	40.71	1024.55	72.49	477.94
6.92	41.26	1011.16	96.2	483.61
13.89	43.7	1015.12	64.99	470.88
28.43	73.18	1012.52	71.05	427.11
27.45	64.34	1007.12	65.87	440
29.05	65.74	1013.29	60.02	440.74
6.63	39.37	1020.33	76.18	489.16
20.39	64.15	1021.31	62.35	457.37
14.29	46.18	1017.01	87.29	464.73
29.86	69.34	1009.61	61.27	438.5
27.29	62.66	1007.63	58.02	439.58
28.15	71.25	1000.51	81.04	431.28
21.31	50.78	1008.68	85.28	445.17
12.68	41.4	1021.59	78.57	466.64
22.67	68.08	1013	66.59	443.79
15.81	54.3	1017.8	68.45	461.63
20.07	51.3	1011.9	94.62	450.46
28.92	66.51	1015.5	34.51	439.09
23.49	42.8	1013.96	65.31	459.9
25.31	65.48	1018.31	55.57	439.72
19.68	51.19	1008.64	94.88	452.04
12.79	41.62	1010.52	81.83	466.91
32.49	74.99	1002.19	34.58	435.43
23.92	73.17	1011.81	92.33	433.78
15.37	50.59	1019.02	98.2	463.35
28.76	69.48	1008.62	55.86	430.14
10.08	40.72	1022.7	67.3	480.8
19.75	54.2	1011.43	83.5	448.89
24.99	51.43	1006.95	79.63	441.45
15.47	43.13	1015.11	50.5	466.63
32.51	69.98	1011.92	49.45	428.37
10.58	39.61	1020.39	71.69	477.18
23.09	69.13	1010.93	90.07	436.67
11.42	41.54	1020.21	71.57	477.5
34.09	68.51	1009	32.96	431.19
25.47	56.89	1013.02	63.21	440.38
25.65	43.77	1011.65	46.18	444.01
19.4	49.69	1012.89	75.53	455.6
17.1	62.1	1020.39	93.63	453.4
11.67	36.18	1016.03	61.44	472.76
12.81	44.34	1015.55	90.37	474.03
27.64	75.6	1017.35	54.78	441.04
10.02	41.44	1017.37	77.65	479.63
13.18	43.8	1023.18	61.21	467
10.17	41.17	1018.58	87.72	478.04
5.09	42.85	1013.78	91.34	481.24
25.64	47.01	1014.81	62.29	454.48
28.56	65.27	1013.28	49.95	437.45
16.88	43.67	1011.43	73.98	463.81
12.84	50.59	1020.08	88.08	470.96
18.19	41.85	1014.93	61.37	466.86
21.97	58.95	1017.78	76.95	443.61
12.87	41.5	1013.51	85.72	469.44
23.87	60.27	1018.94	77.16	439.86
33.79	69.05	1001.62	40.13	435.1
10.86	37.5	1013.36	75.56	473.75
27.84	71.32	1007.72	79.25	431.37
28.9	68.84	1011.64	64.44	437.06
31.48	69.75	1008.9	45.66	438.19
13.6	42.86	1013.37	87.52	472.27
23.86	63.77	1014.6	82.37	440.58
25.57	59.43	1008.88	61.19	438.9
29.26	67.17	1006.6	70.58	436.42
30.01	69.13	1010.11	62.42	425.75
23.19	42.67	1007.83	63.31	446.95
24.65	71.98	1006.46	91.11	431.77
11.33	41.5	1013.58	88.7	475.01
30.69	74.16	1012.71	60.89	435.17
9.68	38.16	1015.54	79.67	475.51
27.63	71.98	1005.45	82.88	426
12	41.17	1019.48	58.71	474.4
25.59	61.08	1013.19	77.28	443.91
9.98	41.54	1019.7	80.79	480.26
22.72	69.84	1005.96	83.9	436.7
18.12	43.69	1016.91	52.95	464.68
9.13	40.02	1031.08	74.76	473.47
22.35	63.94	1010.32	93.02	443.9
30.2	70.02	1009.85	63.39	437.48
16.69	43.52	1021.78	80.87	460.51
15.56	41.1	1003.55	76.92	464.42
14.43	41.76	1024.02	83.57	467.33
28.44	69.84	1003.25	68.24	426.69
15.55	43.02	1011.97	44.66	466.2
9.19	41.01	1022.14	98.98	468.37
26.31	72.39	1001.16	88.43	434.53
24.05	72.24	1011.32	88.94	437.81
24.54	48.06	1013.02	55.18	443.67
18.87	43.43	1009.16	69.5	454.58
27.52	67.9	1005.65	59.52	439.01
26.93	59.54	1004.02	75.5	437.58
14.2	52.75	1025.64	61.02	465.48
4.95	42.07	1004.87	80.88	485.67
18.9	56.03	1020.77	71.83	457.66
25.74	65.38	1009.6	54.34	452.94
31.15	66.25	1008.89	61.08	437.55
9.54	41.17	1019.79	65.61	481.18
26.28	68.14	1005.61	53.17	435.71
12.8	44.34	1016.52	86.73	473.42
13.98	44.84	1023.6	89.09	462.81
16.73	54.3	1017.96	59.44	460.54
19.36	68.61	1010.85	94.87	454.5
7.69	39.96	1023.9	89.18	478.05
19.41	64.45	1009.44	64.05	452.55
30.47	68.24	1009.55	64.98	427.94
7.54	40.72	1023.82	85.15	485.92
24.35	59.21	1018.21	54.46	444.35
27.96	68.51	1007.26	63.21	432.07
28.81	64.96	1000.46	68.05	427.91
21.46	51.61	1010.91	76.41	457.28
26.04	74.67	1016.68	81.2	433.55
28.57	62.26	1010.75	62.12	437.41
24.73	69.05	1003.25	66.44	437.93
27.25	69.98	1008.55	59.55	431.44
24.19	68.94	1007.37	70.83	439.52
17.68	39.08	1002.77	74.24	454.18
21.98	59.39	1015.25	84.52	446.79
8.91	43.52	1022.78	98	478.38
13.33	39.39	1013.93	84.74	471.23
5.21	35.79	1012.44	94.35	485.17
8.95	43.13	1017.56	94.85	479.14
16.96	63.31	1016.42	77.09	454.14
27.26	63.77	1014.07	66.58	436.01
26.85	75.6	1017.43	74.55	433.48
23.39	69.13	1010.99	90.66	434.5
28.57	51.43	1012.02	47.79	450.04
19.91	51.19	1008	90.23	449.23
10.45	40.71	1015.68	81.48	469.22
22.56	47.43	1006.72	54.82	448.65
9.06	41.92	1029.9	90.88	473.37
23.46	51.19	1009.6	73.22	444.82
4.47	35.19	1018.78	92.68	487.43
24.99	58.79	1016.37	67.16	439.2
28.65	68.27	1006.96	52.78	432.73
11.49	35.76	1019.08	60.04	472.45
27.19	71.32	1008.97	88.43	437.92
19.89	44.9	1008.12	67.3	453.09
22.04	57.32	1012.54	62.17	447.27
28.18	71.85	1008.78	82.88	427.83
16.03	65.46	1013.96	87.56	455.17
4.24	39.9	1009.28	96.74	491.25
11.64	40.1	1015.5	87.05	477.2
25.65	68.08	1011.27	75.26	435.91
32.42	75.08	1004.82	41.62	436.26
9.06	39.3	1019.73	84.23	480.41
9.42	41.4	1029.6	87.43	478.12
13.95	40.2	1013.18	90.77	464.79
21.67	60.84	1017.93	81.63	442.33
7.41	40.71	1023.07	83.32	474.25
23.34	63.73	1012.1	79.11	443.68
26.38	70.47	1007.36	76.91	434.02
22.24	69.23	1011.83	79.37	441.9
7.55	41.04	1027.03	83.32	476.58
22.25	59.8	1016.79	69.02	451.64
13.77	42.86	1012.86	88.83	471.94
19.94	38.52	1018.4	55.9	450.48
25.82	57.19	1007.99	62.95	440.8
26.14	71.98	1005.98	82.45	428.91
3	39.64	1011	80.14	485.2
26.34	69.04	1009.44	72.06	444.13
24.94	59.07	1008.89	84.79	440.12
25.96	68.08	1011.34	71.57	432.82
30.05	73.68	1014.95	70.6	434.92
8.99	41.26	1020.52	91.96	476.09
15.89	38.73	1001.45	74.37	465.76
28.02	68.08	1013.44	44.46	434.95
27.18	61.41	1012.17	46.11	449.7
16	43.34	1013.58	78.87	461.7
18.5	41.85	1015.81	64.78	466.8
24.26	42.8	1013.72	61.62	459.65
19.09	56.51	1015.58	92.56	449.24
10.67	45	1022.99	85.91	481.83
32.5	73.68	1014.65	55.72	427.63
20.97	44.63	1007.64	73.69	453.26
28.36	68.08	1013.34	42.82	434.54
25.09	57.43	1013.2	70.42	446.11
26.68	49.02	1008.4	68.01	441.54
29.28	65.71	1013.76	48.05	445.49
16.52	44.88	1017.61	90.08	459.73
16.58	37.64	1015.23	81.59	460.48
29.12	67.83	1008.05	46.86	432.46
24.15	71.73	1009.76	85.16	436.55
19.6	59.21	1017.65	86.29	449.23
17.94	37.2	1012.64	68.11	467.65
31.86	73.88	1005.6	57.68	435.91
11.22	41.93	1023.13	69.35	480.71
18.75	63.09	1018.19	87.84	450.98
10.31	44.63	1020.55	88.62	471.78
15.47	38.73	1001.13	77.61	467.96
7.08	39.99	1010.55	91.44	482.83
24.49	60.27	1018.96	72.62	440.87
24.38	57.17	1009.85	74.46	444.59
22.67	58.2	1016.91	60.75	446.36
25.26	74.33	1014.79	79.56	433.49
14.85	44.63	1020.67	75.76	460.06
28.83	71.32	1006.28	75.65	437.99
9.46	42.28	1008.67	78.16	481.95
26.16	67.9	1005.81	61.02	444.06
32.51	71.22	1005.62	47.6	433.76
15.81	58.59	1014.41	90.03	456.91
20.68	68.61	1011.2	84.81	446.33
26.15	63.21	1012.31	76.44	441.23
23.75	68.51	1013.21	76.01	441.61
23.99	50.32	1008.41	67.4	444.23
29.24	64.33	1011.5	64.14	440.29
15.69	37.87	1022.63	87.71	462.16
27.77	63.87	1017.97	38.77	444.06
10.52	41.78	1013.54	71.52	474.58
13.7	43.22	1012.01	71.57	463.99
14.26	40.92	1022.07	73.96	460.38
11.52	39.18	1023.43	83.29	474.35
5.53	40.64	1020.78	97.25	479.88
17.63	40.55	1002.27	73.42	462.13
8.72	36.25	1029.31	85.73	479.94
25.91	58.98	1010.02	75.31	442.65
22.7	59.92	1011.05	90.84	436.7
16.76	45.09	1014.28	57.71	458.67
20.98	42.23	1013.12	67.37	461.9
18.63	61.27	1019.69	73.67	454.03
9.14	40.6	1015.34	88.91	483.57
32.27	71.85	1008.06	59.28	429.72
28.62	68.24	1010.15	69.31	428.08
26.53	65.18	1012.77	64.37	437.39
19.6	48.14	1013.18	68.71	456.57
14.2	45.51	1015.36	74.85	465.35
15.85	49.69	1015.48	88.65	464.72
13.69	40.1	1014.38	83.57	470.76
18.53	61.27	1019.84	75.22	454.72
24.19	50.23	1015.73	59.77	458.31
21.87	61.45	1011.13	92.22	445.21
19.93	56.65	1020.7	62.82	456.53
9.26	40.78	1023.61	88.48	471.79
29.43	66.75	1017.63	42.72	434.6
21.67	69.71	1010.46	96.83	440.16
13.42	38.91	1012.81	73.82	472.22
21.37	65.94	1010.73	75.09	444.74
22.35	66.44	1011.19	65.41	445.27
12.47	38.25	1012.74	82.89	469.56
18.32	42.18	1002.27	95.99	458.46
14.72	43.34	1013.07	85.61	464.22
17.37	57.76	1016	86.59	456.4
24.19	46.21	1010.79	62.04	440.87
13.85	44.9	1019.11	76.79	467.2
23.42	50.05	1006.79	86.45	441.8
20.38	66.54	1013.95	77.8	448.93
9.15	39.61	1018.69	84.47	475.64
23.94	62.08	1022.47	61.97	447.5
11.01	43.69	1016.7	81.48	477.3
21.03	44.78	1007.99	36.82	459.72
14.41	40.71	1016.78	69.77	467.01
16.7	46.18	1012.6	96.15	455.93
30.52	70.4	1003.9	64.33	438.29
22.18	62.91	1012.14	68.86	449.77
12.8	39.16	1015.94	89.83	472.47
24.18	66.48	1004	64.86	434.5
27.35	69.48	1008.51	65.81	432.31
29.75	70.32	1007.35	55.8	427.2
28.59	69.84	1003.79	67.31	427.53
10.27	40.64	1020.63	84.6	474.99
6.69	40.64	1020.54	92.83	483.01
14.8	40.2	1012.87	88.35	466.27
31.09	74.22	1007.56	46.36	430.3
18.21	62.26	1011.97	87.28	455.88
27.02	72.58	1009.21	89.13	437.8
13.9	45.08	1023.29	83.43	465.31
19.65	44.89	1009.76	75.36	451.35
7.87	41.06	1020.91	87.64	486.57
23.25	63.78	1016.01	72.01	448.82
23.04	63.86	1019.83	59.78	446.22
31.7	76.09	1007.06	72.39	441.36
29.55	66.25	1009.38	69.55	436.29
8.42	43.14	1011.62	80.32	483.49
27.71	54.2	1012.72	47.25	440.74
24.82	66.48	1006.4	70.21	433.62
25.72	70.47	1010.44	70.57	434.94
28.41	61.47	1008.94	56.56	442.54
24.17	48.41	1008.46	76.19	442.62
30.24	73.9	1006.74	56.39	441.31
17.31	44.71	1017.43	35.4	463.05
23.69	71.97	1009.62	93.03	438.62
24.92	48.92	1010.11	36.53	445.56
18.14	67.71	1003.82	95.69	442.45
13.31	40.03	1017.73	84.48	470.31
25.56	75.6	1017.37	69.31	442.2
9.23	42.44	1014.34	94.2	481.29
12.54	40.8	1024.56	68.97	479.65
32.51	73.56	1007.06	59.6	435.23
24.6	49.3	1003.72	72.26	439.46
22.49	62.52	1016.57	63.69	451.87
24.01	60.84	1018.83	63.82	436.32
24.23	58.79	1009.8	75.75	444.01
21.49	68.28	1004.68	80.64	438
8.46	40.8	1023.57	81.27	485.06
33.82	77.17	1008.96	58.91	435.58
12.73	40.27	1005.68	68.77	475.61
23.95	59.92	1010.15	86.37	435.92
32.31	68.94	1006.11	71.78	431.14
5.23	35.57	1026.23	79.38	488.5
29.45	68.84	1011.64	59.7	438.41
25.78	59.15	1013.61	66.68	441.71
19.39	68.61	1011.09	96.51	446.47
26.44	69.34	1009.55	73.18	440.43
25.18	71.98	1006.71	89.86	432.88
12.99	41.93	1020.25	74.64	472.95
29.96	67.83	1008	44.05	433.13
23.76	61.5	1009.15	68.52	441.16
13.78	40	1018.38	68.67	458.74
14.84	41.23	995.02	88	464.85
30.66	70.98	1007.6	72.08	435.66
10.17	41.46	1020.01	84.86	482.36
25.6	73.67	1005.78	84.82	433.25
27.51	63.73	1009.97	66.14	440.81
9.82	41.04	1026.72	77.28	473.98
12.38	44.2	1020.23	81.5	467.04
23.09	73.5	1011.4	89.76	438.56
25.92	60.95	1014.62	48.46	442.84
25.23	64.63	1020.59	52.2	447.28
18.21	41.85	1014.67	56.86	468.4
23.88	67.9	1005.99	67.58	446.34
3.69	38.44	1016.74	82.87	490.78
12.18	40.1	1016.67	91.87	471.49
12.58	43.67	1012.86	94.01	472.65
7.53	41.16	1023.19	91.28	475.7
19.8	52.9	1017.75	66.67	456.64
10.53	37.5	1008.55	99.91	472.32
25.1	61.47	1007.84	75.75	447.27
15.8	41.1	1003	77.36	465.87
22.11	59.8	1016.74	73.9	453.45
23.46	72.43	1008	90.55	435.36
13.7	44.47	1027.51	70.77	468.79
22.72	50.05	1007	88.24	444.43
28.15	74.9	1003.67	76.32	433.63
20.83	44.78	1008.51	35.9	460.6
13.33	54.3	1016.77	80.32	468.1
18.9	57.5	1016.21	93.9	451.42
9.51	39.22	1015.3	72.41	474.12
15.48	41.66	1009.55	66.74	467.06
7	38.5	1014.09	81.32	489.52
14.47	41.76	1021.98	78.41	464
9.31	41.39	1018.3	93.68	480.25
20.54	68.12	1012.23	81.06	440.28
20.04	48.92	1011.14	68.92	447.89
10.91	37.92	1008.66	66.53	473.72
28.46	60.23	1010.2	63.38	439.88
8.97	44.03	1013.16	80.39	474.61
21.09	74.93	1015.11	81.93	443.51
24.78	57.19	1008.08	65.4	443.62
25.65	49.3	1003.73	68.48	440.05
7.1	35.77	1015.39	92.1	480.36
21.76	47.93	1005.34	86.28	444.77
31.41	76.09	1007.68	70.49	430.81
33.34	69.88	1007.65	42.72	437.84
32.19	69.13	1000.45	48.22	425.21
28.45	69.23	1013.07	39.46	436.96
15.01	42.77	1018.21	73.22	462.6
28.07	61.47	1008.68	64.83	442.59
14.95	43.52	1022.43	94.75	464.98
6.59	39.37	1020.34	77.92	488.17
21.11	59.39	1013.87	85.29	446.02
23.92	61.87	1009.63	54.16	441.15
25.69	64.45	1013.05	42	450.94
27.53	70.32	1007.75	49.31	433.72
24.84	56.89	1012.15	67.24	440.36
21.67	50.32	1008.41	85.99	445.31
30.55	70.04	1010.51	49.37	429.56
23.39	61.87	1010.35	48.91	444.03
14.24	44.84	1023.6	94.06	466.67
22.55	47.45	1008.65	67.9	447.42
26.86	72.58	1009.22	88.39	428.69
23.1	66.05	1020.28	80.62	439.03
26.06	49.02	1007.59	74.08	437.9
31.26	70.36	1006.49	60.47	438.15
12.27	41.17	1019.39	52.18	473.84
10.8	41.74	1020.24	78.62	479.32
22.07	60.08	1017.68	71.23	452.56
12.88	40.64	1020.76	92.58	474.58
20.61	60.1	1010.84	80.57	450.46
12.14	40.27	1007.57	73.22	472.84
32.15	72.29	1010.13	50.19	435.71
15.17	54.3	1017.38	72.11	464.39
21.11	65.94	1009.83	71.91	448.77
31.33	65.18	1011.97	36.62	435.77
28.5	72.99	1007.02	67.13	433.24
29.14	75.23	1010.15	54.87	434.82
12.43	40.27	1007.08	61.56	470.92
27.44	47.93	1002.71	59.44	437.76
11.82	42.86	1014.12	88.28	476.7
22.25	51.86	1013.08	83.64	451.04
13.65	44.6	1017.99	87.04	466.06
14.21	39.16	1016.5	85.09	473.87
32.09	79.74	1006.92	61.5	432.85
23.74	62.96	1019.65	63.39	449.48
12	41.17	1019.48	58.71	474.4
15.22	41.35	1003.12	95.45	464.56
29.72	77.95	1014.9	72.73	434.99
19.76	62.1	1020.07	73.55	450.44
21.85	59.8	1016.89	75.28	454.26
19.86	59.14	1016.12	69.32	449.82
6.85	37.49	1011.01	84.53	483.12
9.33	44.03	1011.73	86.04	474.15
14.84	44.63	1019.28	57.37	466
16.46	61.27	1020.02	74.54	456.64
23.82	73.67	1007.26	88.16	438.42
16.09	44.71	1017.86	42.74	464.95
26.87	69.23	1012.71	54.54	433.89
20.19	62.26	1011.37	89.69	443.58
26.44	71.73	1009.52	81.75	430.55
14.56	41.76	1023.82	85.36	464.3
20.32	39.72	1001.38	57.21	456.18
21.05	63.09	1016.49	91.23	447.45
22.61	59.87	1019.12	66.12	441.2
25.86	59.92	1009.92	73.95	436.06
18.77	49.39	1021.06	82.95	454.53
27.36	58.33	1013.86	56.7	439.14
30.76	69.14	1007.63	71.24	431.67
21.73	64.63	1020.84	68.9	450.36
30.32	74.22	1008.31	53.14	429.36
17.75	55.5	1020.15	81.26	459.43
10.2	41.17	1019.56	82.46	479.7
24.4	60.37	1006.77	82.43	440.64
22.61	42.8	1014.24	69.71	460.26
21.08	44.05	1008.13	72.52	449.6
20.3	56.53	1020.27	76.49	454.12
7.64	42.28	1008.49	83.42	483.74
21.47	60.93	1006.46	87.83	442.75
7.92	39.54	1011.51	84.41	481.44
25.19	64.44	1014.75	64.38	444.35
9.28	41.38	1021.96	72.22	486.18
9.86	38.38	1018.22	85.35	479.56
18.71	54.9	1017.12	74.79	456.88
7.76	37.7	1014.82	76.47	480.7
30.21	75.33	1002.24	66.71	431.46
30.8	69.14	1007.68	63.78	433.62
21.75	58.79	1012.42	87.58	447.58
24.97	54.2	1012.68	74.25	439.71
22.7	61.41	1012.08	78.08	449.75
8.54	38.08	1019.75	71.24	478.31
25.58	64.45	1011.07	61.47	447.16
28.09	65.27	1013.27	51.96	440
32.9	68.51	1012.95	50.09	430.23
23.63	65.59	1013.1	76.95	440.56
19.12	50.16	1011.52	99.71	451.49
17.45	42.28	1007.64	69.19	463.83
24.02	77.54	1008.33	83.92	438.52
13.92	43.41	1015.12	61.64	464.76
12.35	41.38	1021.99	55.38	474.94
24.42	65.94	1011.25	65.04	439.63
32.36	73.91	1003.88	59.84	431.92
23.68	49.02	1007.53	86.05	440.68
32.41	67.83	1008.54	55.96	426.85
21.34	48.06	1014.49	63.23	458.13
25.34	59.39	1014.02	73.58	439.8
19.88	47.03	1012.27	91.99	456.44
9.91	39.64	1010.57	75.82	478.63
32.37	67.83	1008.32	57.39	426.76
13.42	48.04	1011.63	99.32	461.36
27.44	65.59	1010.76	68.67	441.08
29.78	65.74	1012.13	44.96	441.51
25.69	62.26	1011.38	74.08	436.36
25.54	60.37	1006.49	71.54	436.14
25.09	65.38	1009.99	54.28	453.58
7.05	40.69	1020.53	89.67	476.75
23.89	64.27	1013.37	75.22	450.82
6.91	36.08	1021.82	84.31	486.37
6.71	40.72	1022.78	80.69	483.11
26.94	62.91	1011.68	41.3	449.1
21.55	60.27	1017.42	92.59	443.93
24.14	69.23	1012.4	73.26	433.92
33.72	74.33	1011.4	37.51	428.96
15.79	38.28	1014.4	74.84	465.64
28.26	69.23	1013.01	42.1	436.31
21.93	62.91	1013.45	74.62	449.17
34.35	77.17	1009.26	59.33	437.65
26.76	48.41	1010.53	47.38	440.63
31.82	73.68	1014.8	40.58	433.32
18.04	44.85	1015.13	48.4	463.31
27	69.34	1008.88	74.4	439.26
24.77	69.71	1009.86	85.56	441.29
10.01	40.78	1023.71	88.11	470.82
26.33	64.45	1013.12	43.31	450.67
7.48	38.5	1014.01	77.35	488.43
28.53	76.86	999.08	75.77	431.64
31.12	68.94	1006.05	68.46	431.92
32.09	69.4	1003.1	56.91	430.62
28.28	56.9	1006.38	64.99	445.61
14.43	38.28	1014.76	79.76	467.12
16.16	25.88	1009.58	72.24	461.86
32.16	76.2	1008.04	51.74	433.29
10.72	39.35	1015.35	86.43	480.18
24.34	50.16	1004.78	74	445.33
24.11	66.51	1015.35	56.01	437.21
24.85	71.98	1005.97	95.09	433.64
23.66	61.86	1013.33	83.09	444.27
24.94	63.94	1012.72	73.71	438.55
24.69	71.73	1010.13	70.54	436.78
31.27	73.77	1003.27	71.48	430.32
16.76	48.14	1012.92	65.74	456.31
19.36	44.6	1016.25	45.65	464.56
14.97	43.67	1011.13	87.33	465.54
23.36	73.18	1011.96	89.15	435.85
26.38	65.12	1016.1	47.57	441.07
16.64	44.9	1021.02	70.34	460.93
31.39	69.59	1008.28	62.86	435.76
26.43	66.48	1004.36	55.9	435.59
24.27	63.87	1018.88	53.96	420.26
14.72	39	1016.42	76.42	464.93
24.14	62.66	1007.33	73.27	439.93
27.45	66.25	1009.3	77.58	437.37
13.3	50.59	1019.38	92.96	469.13
17.66	44.9	1020.5	71.33	457.11
23.67	63.86	1019.67	57.95	441.73
6.28	43.02	1013.72	88.13	487.17
23.02	63.47	1012.21	80.61	443.66
17.3	58.59	1015.52	87.17	454.88
15.1	41.35	1003.84	97.89	466.14
11.53	41.14	1025.63	88.54	469.04
21.26	51.43	1009.96	80.66	455.45
12.55	39.58	1010.68	76.9	472.31
28.52	70.02	1010.34	54.21	441.98
18.92	67.71	1008.19	64.53	446.77
17.1	43.52	1020.3	70.51	461.51
23.27	64.15	1020.98	71.18	452.26
14.05	40.71	1016.36	68.58	465.74
7.45	39.61	1017.88	79.73	478.89
10.98	41.54	1019.94	69.83	479.08
31.41	74.16	1008.65	68.5	430.37
22.78	59.92	1011.28	88.78	440.87
22.71	75.23	1010.48	76.86	444
34.2	68.14	1002.7	56.09	427.05
31.53	70.36	1006.29	57.11	438.71
31.25	73.5	1010.81	45.2	432.25
8.48	38.5	1013.5	66.51	485.29
28.07	66.17	1010.58	64.11	443.77
25.06	52.36	1014.7	67.98	454.13
18.83	48.98	1016.33	74.23	453.28
18.22	44.34	1019.35	56.78	469.27
29.19	70.32	1008.28	55.42	427.9
13.73	50.59	1020.44	85.54	459.6
2.64	39.64	1011.02	85.24	481.29
18.61	63.09	1019.37	83.08	449.81
17.1	49.69	1005.53	81.82	457.32
34.76	68.94	1006.75	41.31	427.42
9.44	43.99	1020.31	98.06	475.01
15.33	37.2	1013.4	78.99	466.81
33.33	73.03	1014.2	42.28	436.05
11.48	37.92	1008.47	70.55	472.9
14.17	39.59	1010.99	94.08	464.17
13.43	40.1	1015.82	87.9	471.77
26.91	70.47	1007.55	72.59	434.24
18.01	54.9	1017.04	77.82	455.91
23.33	58.95	1017.93	66.37	442.71
22.19	60.37	1008.45	92.43	440.75
14.14	39.82	1012.46	81.15	472.52
17.67	43.96	1011.68	82.13	466.31
15.16	40.73	1017.7	86.37	459.19
13.79	45.08	1025.02	84.36	469.55
18.77	39.54	1009.39	63.35	458.58
22.5	58.79	1017.48	73.02	443.35
31.24	68.3	1015.89	42.84	435.2
21.19	52.3	1008.24	79.19	447.06
20.91	58.2	1018.1	62.8	446.19
20.83	70.72	1009.56	89.37	446.48
9.57	39.82	1013.12	89.15	468.02
28.05	62.6	1017.01	46.46	449.73
8.02	39.04	1018.49	68.07	479.53
25.35	74.33	1015.29	77.84	435.66
13.09	43.67	1012.22	91.91	474.45
6.22	38.68	1017.87	69.41	483.55
17.34	44.78	1007.81	56.38	454.97
6.86	40.02	1031.5	77.94	476.45
26.15	64.27	1013.03	59.77	439.11
21.79	58.2	1017.21	66.74	446.94
18.76	52.9	1016.27	64.7	458.26
34.4	77.95	1009.83	57.86	430.87
11.75	42.32	1015.28	77.25	470.44
26.35	49.5	1012.67	41.34	458.41
11.43	41.16	1022.81	92.04	466.86
23.71	68.63	1014.54	46.04	449.41
20.23	57.76	1016.84	81.26	452.5
9.93	39.04	1023.78	77.08	480.54
15.3	38.62	1017.19	70.63	462.65
26.77	74.22	1008.87	74.68	434.35
30.39	70.98	1007.55	72.76	435.48
28.8	74.9	1003.48	75.01	434.01
10.15	39.22	1020.09	68.75	474.87
22.32	70.47	1010.97	83.16	441.87
14.19	49.83	1006.52	90.72	462.86
25.19	63.94	1012.78	75.15	438.73
14.27	41.48	1014.83	62.7	458.19
13.29	71.14	1019.63	75.09	464.18
23.56	71.85	1009.67	74.78	439.48
10.72	41.17	1019.68	60.71	479.21
4.99	41.03	1022.33	83.11	493.16
12.05	49.83	1008.54	95.11	454.18
18.97	43.43	1012.72	75.69	453.2
31.9	73.42	1010.82	60.58	432.27
9.32	36.66	1027.46	70.76	479.13
8.76	41.82	1033.29	76.5	480.08
26.58	70.98	1008.96	77.36	434.41
26.22	49.82	1015.48	55.8	454.2
24.03	58.46	1015.71	70.15	442.03
7.14	44.71	1019.98	71.9	487.71
20.07	49.21	1012.34	56.8	454.25
17.07	44.9	1020.74	70.18	460.19
20	69.48	1011.05	85.51	448.79
14.07	40.78	1024.67	72.66	456.71
20.36	57.5	1014.36	82.96	452.28
14.8	44.21	1021.59	89.24	466.21
13.75	44.47	1029.63	70.74	467.14
25.52	67.17	1007.33	85.12	440.02
32.38	67.17	1006.97	60.04	438.67
21.31	49.39	1020.18	71.35	455.34
21.86	64.45	1015.83	63.36	457.8
26.13	71.25	999.8	88.47	430.6
9.45	36.71	1024.24	83.28	476.02
28.61	68.12	1012.23	46.45	435.28
27.24	66.75	1017.78	69.6	433.65
14.48	40.83	1009.42	81.74	469.64
17.47	58.16	1016.36	82.26	456.97
10.27	38.38	1022.16	70.77	475.58
23.69	58.05	1012.08	74.26	444.46
19.66	51.43	1010.17	84.19	459.12
29.76	73.56	1008.07	84.85	432.51
11.17	39.72	1002.4	81.4	474.64
31	77.95	1010.14	65.97	431.62
15.04	41.35	1004.29	99.1	467.96
17.78	58.95	1016.32	89.61	450.89
18.47	62.1	1019.86	82.57	452.51
11.44	34.03	1018.57	74.06	476.06
29.69	47.93	1002.85	44.76	438.09
24.19	47.45	1008.26	64.25	446.3
9.84	40.22	1009.5	85.38	479.65
31.19	69.68	1012.6	52.06	440.97
23.77	51.43	1006.67	84.09	441.54
31.5	74.16	1011.72	56.42	436.43
24.73	70.72	1009.82	88.79	439.3
12.65	41.93	1023.07	65.05	479.53
10.16	41.62	1013.15	94.3	465.05
16.49	49.39	1018.1	93.13	461.54
12.58	39.72	1018.08	64.25	469.38
29.23	72.99	1007.04	63.47	431
27.44	59.74	1010.99	56.42	452
26.14	61.02	1010.13	66.71	436.17
24.24	72.43	1008.02	86.4	436.6
19.1	56.53	1020.18	76.38	455.52
23.36	72.24	1010.99	94.41	434.15
21.04	47.43	1007.15	64.82	450.27
12.24	44.92	1023.74	88.21	473.26
27.61	69.68	1012.79	77.01	438.31
26.2	71.73	1010.14	76.14	430.89
12.89	36.71	1013.36	87.29	475.13
25.78	47.93	1003.67	67.23	442.46
9.57	52.75	1022.32	75.4	470.93
26.34	59.21	1013.37	58.98	439.22
26	69.89	1015.12	73.06	433.5
22.78	58.96	1013.65	57.06	452.03
25.2	59.21	1017.54	55.53	444.16
8.52	41.55	1002.09	86.81	483.63
23.33	54.2	1012.47	79.48	440.11
29.64	67.79	1009.99	51.23	440.74
28.14	61.47	1009.69	64.66	435.35
14.67	42.28	1007.21	65.17	469.02
32.87	70.8	1009.54	59.85	433.1
5.28	42.07	1003.82	80.84	485.24
15.92	39.16	1006.59	71.32	460.45
14.12	39.52	1018.41	78.32	465.09
16.14	44.21	1020.36	80.59	461.03
5	40.64	1021.05	94.84	485.27
27.99	66.91	1008.47	59.63	439.74
17.19	43.14	1014.34	68.62	464.72
17.33	53.16	1013.16	82.93	460.67
11.56	40.71	1015.85	76.08	469.17
25.16	47.01	1014.99	64	452.64
5.23	40.78	1025.13	92.74	483.12
29.86	70.8	1010.22	70.36	437.47
9.43	41.4	1028.42	84.92	479.28
11.54	45	1022.77	80.79	482.34
10.45	40	1019.01	89.01	465.43
23.89	65.18	1012.46	78.29	438.97
19.72	46.21	1010.54	77.74	449.33
33.75	64.96	1002.54	39.28	432.62
10.2	41.62	1016.52	98.09	462.87
8.72	40.72	1023.48	77.87	485.3
27.62	63.9	1013.11	43.56	442.89
19.62	43.56	1012.89	37.6	463.33
25.15	68.51	1013.25	72.31	440.96
14.96	43.02	1012.77	42.93	467.16
31.09	64.05	1011.32	61.14	440.62
23.62	61.87	1010.07	48.77	447.93
13.33	38.47	1015.42	58.27	466.26
16.78	58.95	1017.74	96.24	450.02
22.1	65.48	1019.3	66.96	447
15.69	37.87	1021.18	84.38	465.41
22.46	58.33	1013.21	68.68	445.9
18.87	67.71	1004	87.35	444.77
26.78	52.3	1008.52	61.23	441.21
22.72	58.82	1012.54	77.72	448.67
13.18	40.03	1017.75	82.29	470.88
18.25	60.1	1009.72	90.15	456.25
25.65	69.23	1012.55	62.02	435.25
14.73	54.3	1016.75	67.13	463.63
22.83	59.43	1005.51	83.93	440.76
20.13	47.03	1012.59	83.03	459.15
20.4	54.9	1016.68	64.26	452.56
24.14	59.87	1018.47	57.76	444.04
17.46	39.54	1008.21	74.24	462.52
16.19	36.99	1007.37	92.4	462.94
14.79	47.83	1007.27	92.04	463.22
26.78	73.06	1007.99	90.47	433.25
21.87	49.39	1019.99	67.05	451.97
14.32	40.78	1024.49	73.84	457.92
24.2	63.21	1012.25	79.86	449.03
22.24	41.1	1001.96	42.6	451.95
24.39	70.72	1009.78	82.25	442.04
24.41	73.67	1007.39	86.92	435.56
32.06	69.88	1006.88	63.53	432.47
14.43	44.47	1028.57	70.7	466.56
16.13	43.48	1014.41	50.05	459.47
17.67	53.16	1013.59	83.31	457.99
18.85	67.32	1012.91	82.37	446.7
5.42	41.38	1020.77	86.02	491.38
25.9	47.45	1007.8	55.96	443.13
27.55	64.96	999.73	57.34	431.33
10.75	40.81	1015.93	79.27	474.71
23.97	44.57	1007.35	62.71	448.17
6.37	41.03	1022.23	80.36	490.47
22.47	47.45	1007.62	76.65	447.14
19.02	44.85	1014.57	43.37	465.42
26.35	59.87	1013.24	73.63	447.26
15.56	41.04	1025.8	64.81	457.11
23.95	66.48	1003.55	73.68	431.87
13.74	38.73	1004.34	82.82	470.06
18.03	53.16	1013.06	82.03	458.04
6.16	38.5	1012.83	93.68	490.92
7	36.24	1013.15	89.64	483.06
12.08	41.39	1019.45	78.3	477.8
19.13	59.21	1018.32	89.66	450.81
7.67	35.77	1017.55	60.97	480.06
30.28	67.22	1014.39	53.32	447.67
32.15	69.98	1013.3	55.13	429.86
31.68	74.16	1011.3	55.94	434.61
28.37	75.6	1017.48	55.19	439.25
14.29	39.59	1012.36	92.38	463.13
31.91	67.83	1008.76	53.22	425.28
30.85	70.94	1007.47	54.79	431.77
20.14	46.33	1013.24	83.39	453.35
23.59	43.77	1010.85	55.98	448.42
31.01	73.5	1010.92	48.61	432.41
11.3	25.36	1008.66	96.18	471.19
29.51	75.6	1017.92	50.61	431.18
13.92	39.39	1012.94	80.52	471.81
17.78	52.08	1006.9	100.09	453.31
4.71	39.42	1026.4	84.42	481.28
28.29	47.93	1002.6	53.23	437.13
34.11	73.56	1006.77	45.92	432.78
21.44	50.78	1008.87	87.56	443.3
17.67	45.09	1014.26	51.92	457.67
12.49	41.62	1011.37	82.68	461.35
27.6	67.25	1017.78	54.25	438.42
22.12	57.19	1007.56	76.5	442.51
7.77	40.27	1010.25	83.65	485.54
10.63	42.28	1008.37	92.68	474.97
21.84	60.29	1017.23	66.89	454.4
19.15	44.34	1019.54	48.09	468.8
25.63	58.86	1014.86	52.75	443.84
12.57	41.79	1014.99	87.8	461.88
13.55	40.1	1015.7	86.68	474.59
5.21	43.65	1017.64	78.62	486.08
13.39	49.83	1007.14	90.88	466.04
8.12	43.02	1013.56	85.26	483.55
32.31	77.95	1010.15	62.17	430.15
14.57	25.88	1008.92	69.16	464.11
29.78	69.71	1008.96	67.46	434.33
18.61	67.71	1004.07	84.49	443.57
27	71.25	1002.66	70.59	437.22
30.49	64.44	1013.43	51.73	438.09
27.14	70.32	1007.08	73.08	427.21
25.68	58.41	1013.71	70.61	440.78
25.42	75.6	1017.39	77.63	438.24
14.47	48.79	1017.05	69.87	466.25
9.45	41.4	1027.34	86.66	475.49
20.71	58.18	1007.63	98.44	447.06
8.8	39.42	1025.17	68.72	476.5
31.44	64.44	1014.04	49.15	437.6
9.75	35.76	1019.88	62.31	474.31
18	43.7	1015.4	61.28	464.26
29.52	77.24	1008.55	76.24	433.82
17.83	43.72	1008.64	78.72	453.86
23.17	62.39	1008.04	89.42	439.29
22.33	45.87	1007.8	63.61	447.02
16.65	49.69	1014.01	91	460.03
21.53	59.8	1016.46	74.72	454.99
20.3	62.52	1017.96	75.17	451.86
21.01	58.96	1014.33	61.8	453.88
25.12	77.95	1009.26	82.95	433.4
26.84	71.94	1006.6	79.12	427.2
14.63	41.23	998.96	86.4	466.36
14.62	44.84	1023.41	85.17	464.51
8.83	41.14	1025.37	94.36	474.51
25.54	70.47	1009.28	73.5	436.16
22.28	58.12	1014.54	83.27	448.97
22.89	62.39	1007.84	88.16	448.13
9.84	36.66	1026.7	70.02	477.62
30.3	73.67	1005.57	58.74	431.57
19.02	49.25	1019.75	58.29	453.49
32.51	69.98	1013.29	54.07	429.66
23.56	60.77	1017.93	76.34	443.13
21.69	57.17	1011.75	82.63	446.61
23.2	61.02	1009.63	79.45	443.23
28.19	71.97	1008.85	84.67	438.8
23.49	47.45	1008.46	66.18	446.72
13.93	40.2	1013.41	89.86	466.47
11.82	41.74	1022.36	74.06	476.21
29.08	52.84	1006.14	40.09	438.24
27.9	63.13	1011.8	70.04	439.76
23.79	50.16	1005.32	75.82	435.49
8.84	42.49	1010.28	89.09	481.58
31.85	73.91	1003.6	60.22	431.26
30.29	74.16	1008.77	75.23	431.39
18.03	58.86	1015.99	89.03	450.33
15.92	41.2	1016.04	73.37	468.91
19.02	52.72	1025.44	51.9	461.57
12.41	41.16	1017.45	93.64	464.08
31.11	75.33	1002.32	64.25	433.37
20.54	69.05	1001.6	79.62	442.86
23.32	69.23	1011.75	75.59	436.18
24.66	60.29	1018	59.56	445.26
29.17	74.34	1004.51	82.02	433.03
19.06	50.16	1011.36	99.64	449.74
7.52	39.61	1018.61	78.96	481.54
26.12	63.31	1013.97	51.6	439.77
18.24	49.5	1014.37	79.36	464.13
14.09	41.2	1016.45	67.27	472.42
14.8	58.2	1018.29	85.11	455.14
14.73	39.52	1017.01	74.21	470.45
24.42	63.07	1011.49	67.39	444.72
11.49	39.22	1016.35	53.11	471.47
25.54	69.13	1001.64	90.98	428.74
23.05	62.52	1016.5	65.65	449.98
5.89	39.48	1005.11	59.83	484.91
13.87	49.83	1006.76	89.14	462.46
27.33	51.43	1006.18	67.6	439.12
26.51	67.25	1017.85	64.17	435.52
11.69	35.76	1019.02	55.6	471.72
8.75	40.22	1008.96	90.53	482.8
28.75	77.24	1008.92	77.17	433.03
15.48	44.99	1011.94	69.95	463.92
19.13	68.61	1010.65	94.92	448.69
17.82	56.89	1014.24	77.73	453.83
23.24	63.78	1017.1	63.8	446.95
25.92	73.77	1001.27	94.28	432
16.25	58.16	1018.34	78.59	458.31
24.27	74.93	1012.73	73.81	443.06
13.48	39.35	1014.56	81.25	470.66
12.21	44.34	1017.98	86.17	475.06
9.75	52.72	1026.03	78.53	473.41
24.56	58.82	1011.42	72.47	442.76
8.04	40.64	1020.64	89.26	477.78
14.03	49.83	1006.64	90.01	463.71
30.04	67.25	1017.65	52.84	435.17
18.98	38.52	1018.85	63.16	454.6
28.26	72.43	1006.68	72.3	426.2
11.34	41.54	1020.25	75.83	477.24
9.15	44.03	1012.45	81.67	474.26
14.69	53.82	1016.54	63.49	463.52
19.05	59.21	1017.99	89.53	451
18.53	39.72	1001.26	64.08	457.26
9.96	39.66	1015.23	82.98	480.6
16.16	41.79	1007.53	76.21	453.39
12.36	45.09	1013.05	88.4	467.2
27.79	71.85	1008.95	87.35	427.67
13.85	48.06	1011.13	75.2	462.39
14.96	39.31	1010.52	71.28	461.97
23.71	60.23	1009.76	90.67	439.66
18.91	45.01	1012.9	59.81	456.12
18.59	43.14	1011.92	52.63	464.48
16.52	43.7	1015.08	58.36	466.73
14.34	42.86	1031.75	66.81	466.17
12.07	40.81	1025.63	68.02	475.96
9.53	44.03	1008.87	89.99	471.23
17.18	40.55	1000.47	72.03	461.73
16.4	38.01	1022.2	73.05	463.79
22.17	65.61	1014.71	70.91	449.91
14.78	38.58	1017.02	82.4	460.54
7.54	38.56	1016.49	69.1	486.76
22.89	48.98	1014.55	48.21	448.56
26.19	73.77	1001.31	91.87	433.34
29.28	74.33	1011.66	72.37	426.53
13.64	44.88	1019.85	56.86	466.66
26.36	54.5	1015.35	66.87	451.81
32.84	77.95	1014.68	45.8	431.97
15.82	44.2	1018.96	66.73	460.2
13.3	37.9	997.41	91.51	465.61
18.49	41.1	1001.9	59.99	460.76
27.01	43.21	1011.71	77.84	434.09
25.57	62.96	1019.92	58.34	444.81
13.93	40.24	1017.88	88.35	469.25
32.35	77.95	1014.76	60.88	432.72
10.77	44.78	1012.87	84.16	470.66
26.27	62.91	1011.97	48.06	447.76
21.01	50.9	1012.24	70.82	453.99
6.9	39.81	1016.74	88.24	481.88
12.6	41.5	1013.07	86.22	472.45
18.71	39.39	1014.09	62.82	465.57
23	57.76	1017.64	56.86	451.39
28.37	68.12	1012.41	45.87	436.42
12.02	39.69	1006.05	84.66	470.17
13.34	40.8	1026.56	64.85	474.47
27.66	76.86	1001.31	69.47	436.64
8.99	36.66	1028.11	71.98	481.03
14.87	42.77	1017.94	75.06	462.03
10.61	37.5	1008.8	100.13	472.9
22.64	58.66	1011.68	60.97	449.79
19.2	54.2	1011.46	84.44	450.75
17.76	40.55	1002.82	73.77	461.8
23.81	57.5	1015.53	70.66	448.72
10.4	45.01	1018.58	93.48	470.79
14.46	53.82	1016.55	68.11	462.6
23.19	49.82	1014.59	70.52	451.08
14.86	44.85	1016.19	67.43	468.87
19.09	66.51	1015.11	76.38	458.41
16.84	56.03	1020.25	70.37	437.14
16.57	43.7	1015.67	71.95	465.78
18.14	43.56	1012.83	47.1	461.71
12.62	40.83	1010.06	81.52	470.94
24.29	62.91	1013.04	65.85	442.18
19.08	59.15	1013.1	81.82	451.33
13.47	44.88	1017.56	93.23	476.67
31.4	66.54	1003.55	57.73	425.91
10.39	40.22	1009.77	83.27	478.58
28.13	56.9	1007.17	51.66	436.95
27.6	69.34	1009.63	71.58	440.6
8.94	41.38	1021.5	79.45	479.95
11.76	39.28	1016.9	91.06	478.07
24.44	47.93	1003.13	67.04	440.53
15.54	39.31	1009.69	71.19	461.06
27.19	62.91	1011.57	53.66	444.8
21.12	49.15	1021.29	52.9	456.92
27.88	70.79	1005.06	72.5	429.62
25	68.14	1005.35	57.13	437.67
17.12	58.95	1016.74	90.41	451.67
24.7	50.23	1016.23	62.03	454.42
23.54	65.27	1013.78	64.28	445.19
26.3	69.05	1005.37	41.7	438.12
14.43	43.5	1021.86	83.14	466.58
21.87	74.87	1009.28	85.4	442.37
13.03	41.26	1022.17	79.79	466.02
17.7	49.21	1015.16	67.91	455.97
30.56	69.14	1007.49	71	432.26
10.03	40.96	1024.57	91.1	478.79
8.85	41.06	1020.99	86.05	486.4
24.48	69.45	1013.86	62.39	435.74
25.74	63.73	1010.88	70.87	441.9
12.11	38.28	1013.56	93.21	469.93
28.51	70.02	1010.58	54.68	441.66
29.25	66.51	1015.53	33.65	441.7
21.81	65.06	1014.6	66.41	447.13
19.2	59.21	1017.84	89.56	450.86
17.51	39.54	1010.22	71.53	462.12
19.69	57.32	1012.41	75.51	449.59
11.21	40.75	1016.45	86.14	479.2
13.08	44.9	1020.47	86.46	472.01
23.25	72.99	1009.17	89.85	438.51
30.08	67.25	1017.57	47.77	432.1
12.85	40.35	1011.29	81.27	472.69
10.48	36.71	1023.18	81.37	473.3
25.72	74.67	1016.64	75.93	434.83
21.94	50.32	1008.44	86.98	444.89
28.18	60.07	1016.34	49.13	441.61
27.89	70.94	1007.54	49.18	435.21
16.32	43.56	1014.4	59.77	463.57
20.29	49.69	1008.94	69.91	454.74
5.81	45.87	1009.63	94.38	479.66
16.2	38.73	1002.14	75.03	467.89
8.25	37.49	1009.02	81.09	480.38
34.61	73.03	1013.61	36.91	438.56
7.81	39.64	1011.42	86.68	482.22
11.59	40.05	1014.96	86.22	474.46
22.18	45.09	1014.04	43.13	455.4
13.66	40.55	1005.46	96.02	467.7
9.59	34.69	1027.65	75.32	478.88
27.95	77.54	1010.12	78.97	434.7
25.88	66.48	1004.24	63.16	434.4
18.93	59.39	1013.92	68.78	450.14
21.07	67.07	1004.64	86.16	446.05
6.89	39.37	1020.21	74.17	486.9
15.77	58.16	1016.09	82.56	450.11
24.74	63.87	1016.91	55.65	447.02
19.04	43.43	1009.25	68.74	453.32
21.11	69.94	1004.37	84.26	439.91
21.8	51.3	1012.07	89.51	450.25
14.13	43.41	1015.26	55.63	461.96
22.71	59.43	1005.68	83.52	441.24
20.83	67.32	1011.76	73.11	443.17
13.44	39.39	1012.93	84.29	469.67
24.74	59.39	1015.23	74.64	437.49
16.28	42.99	1007.5	77.27	464.13
33.15	70.4	1003.72	53.98	430.15
16.57	41.79	1005.82	72.25	452.84
6.77	38.18	1017.8	81.13	484.31
21.46	58.18	1007.45	95.33	444.12
10.29	40.56	1017.28	69.13	481.7
23.95	60.37	1004.96	79.48	440.9
18.18	61.87	1008.64	66.28	453.1
19.97	59.21	1017.87	83.46	450.41
24.17	73.18	1011.72	86.1	437.27
13.2	40.83	1007.75	94.98	472.41
21.31	42.8	1014.1	75.77	459.84
21.23	68.08	1012.82	74.57	445.41
24.77	71.94	1006.77	88.86	432.27
12.45	40.1	1015.4	82.61	473.63
25.14	67.32	1013.96	41.78	435.39
12.57	43.8	1023.2	56.85	466.68
24.46	61.9	1013.88	87.16	441.34
25.73	66.54	1010.07	55.97	437.07
8.03	40.67	1020.13	70.87	492.26
23.81	66.51	1016.96	70.16	438.32
7.69	38.06	1020.72	83.47	483.54
20.92	63.86	1020.49	72.98	449.09
23.48	72.99	1009.61	88.16	437.1
34.24	74.67	1016.24	25.56	425.58
22.59	70.32	1007.07	74.39	437.39
15.43	39.64	1008.58	87.99	464.05
6.58	40.67	1020.18	71.07	494.84
25.46	56.89	1012.59	62.9	443.5
12.25	44.58	1016.47	81.15	475.24
29.86	64.79	1017.37	44.8	439.89
5.66	40.62	1015.87	84.97	485.18
28.51	74.78	1009.84	59.06	434.43
17.07	41.35	1005.88	83.43	464.6
27.75	66.51	1015.42	39	433.08
26.3	51.43	1012.05	63.62	442.28
26.65	58.41	1013.53	65.83	442.66
31.11	71.8	1010.81	56.08	437.2
23.88	69.94	1007.48	61	440.63
12.21	41.67	1012.88	85.19	475.07
16.32	50.88	1013.37	97.19	458.28
16.6	41.93	1022.01	48.98	467.51
8.96	40.02	1031.21	82.32	475.47
17.51	58.86	1016.78	83.63	453.2
29.08	67.07	1005.73	57.18	435.57
6.18	41.38	1020.23	81.38	490.81
30.54	70.17	999.42	64.32	434.62
22.18	62.39	1007.84	85.74	452.31
26.86	68.08	1012.99	50.04	436.25
20.42	62.96	1020.34	84	452.08
12.65	44.34	1019.4	71.45	468.8
15	41.35	1006.6	86.95	467.71
29.07	51.43	1006.22	61.58	438.79
22.95	67.79	1009.89	91.69	442.19
29.22	60.23	1009.73	61.5	436.32
17.77	44.6	1016.97	54.25	460.13
7.55	38.08	1019.37	76.32	485.49
10.45	41.01	1020.57	93.84	465.74
23.55	65.12	1016.23	66.65	446.44
20.79	50.66	1013.39	77.93	454.78
19.86	41.67	1012.31	53.9	462.86
25.3	71.29	1007.86	62.98	437.17
8.23	40.77	1011.92	90.59	479.24
28.69	67.79	1011.01	66.4	439.87
24.62	68.31	1010.45	75.18	448.58
22.5	70.94	1008.04	82.39	442.4
34.51	73.03	1013.73	39.42	439.8
27.44	66.56	1005.51	69.28	428
20.32	39.72	1002	51.71	458.8
13.79	42.07	1018.27	88.06	462.25
23.65	71.98	1006.09	93.39	434.11
17.37	40.55	1001.19	71.42	460.97
13.86	41.78	1010.75	57.9	467.39
18.86	46.48	1007.28	78.47	452
4.87	42.85	1013.6	92.3	482.22
6.75	39.9	1008.3	87.42	484.05
8.53	43.14	1012.25	78.88	480.08
23.67	68.67	1006.71	77.22	445.32
18.56	67.71	1004.77	85.28	444.9
27.37	63.73	1009.79	65.25	437.24
10.59	41.26	1008.1	98.27	474.76
14.68	58.2	1018.5	83.3	458.51
7.33	40	1018.96	80.76	478.16
13.89	41.49	1020.02	86.47	469.6
22.98	69.84	1005.55	84.1	437.49
24.4	60.32	1016.5	70.96	447.73
13.94	41.26	1021.67	74.4	467.9
24.62	58.66	1011.43	56.61	449.8
26.8	49.3	1003.86	62.75	438.56
18.63	50.16	1010.21	97.13	450.14
20.65	66.51	1014.94	71.83	456.49
26.96	73.68	1013.81	84.77	429.48
19.44	60.07	1014.8	69.06	452.89
26.73	68.84	1010.75	66.83	440.45
22.35	51.43	1011.34	77.33	445.34
13.48	46.18	1018.15	88.38	464.58
16.76	43.67	1011.27	70.55	462.44
26.2	74.67	1016.69	84.38	430.22
31.19	68.3	1014.86	39.1	430.48
23.09	51.19	1009.4	81.61	443.22
12.28	40.92	1023.23	89.14	460.33
27.77	51.43	1006.58	69.01	438.7
17.85	45.64	1020.11	82.94	459.59
16.66	36.71	1013.68	70.66	466.07
17.8	62.26	1011.81	89.81	451.62
11.53	41.39	1018.39	85.52	474.49
5.95	35.57	1025.84	77.61	487.72
7.35	41.66	1015.55	79.67	485.35
23.34	59.14	1017.47	78.91	439.6
6.71	40.96	1022.71	91.89	486.58
12.27	43.8	1023.21	57	468.55
9.51	40.81	1015.69	82.52	475.29
10.29	40	1021.46	90.6	479.58
10.91	42.34	1021.83	94.99	470.91
15.67	38.62	1015.76	66.29	463.17
22.1	58.33	1013.71	69.09	441.31
24.59	71.94	1006.89	88.52	430.28
28.01	44.89	1008.98	48.52	444.76
19.17	52.9	1016.56	65.23	458.59
28.34	73.68	1015.05	76.73	432
12.71	41.39	1019.3	74.2	475.13
21.47	58.79	1017	76.97	446.33
13.67	41.48	1017.51	63.54	463.97
9.24	41.4	1030.72	87.36	476.9
[truncated: 7,569 more rows]

## Sheet: Sheet5
AT	V	AP	RH	PE
8.34	40.77	1010.84	90.01	480.48
23.64	58.49	1011.4	74.2	445.75
29.74	56.9	1007.15	41.91	438.76
19.07	49.69	1007.22	76.79	453.09
11.8	40.66	1017.13	97.2	464.43
13.97	39.16	1016.05	84.6	470.96
22.1	71.29	1008.2	75.38	442.35
14.47	41.76	1021.98	78.41	464
31.25	69.51	1010.25	36.83	428.77
6.77	38.18	1017.8	81.13	484.31
28.28	68.67	1006.36	69.9	435.29
22.99	46.93	1014.15	49.42	451.41
29.3	70.04	1010.95	61.23	426.25
8.14	37.49	1009.04	80.33	480.66
16.92	44.6	1017.34	58.75	460.17
22.72	64.15	1021.14	60.34	453.13
18.14	43.56	1012.83	47.1	461.71
11.49	44.63	1020.44	86.04	471.08
9.94	40.46	1018.9	68.51	473.74
23.54	41.1	1002.05	38.05	448.56
14.9	52.05	1015.11	77.33	464.82
33.8	64.96	1004.88	49.37	427.28
25.37	68.31	1011.12	70.99	441.76
7.29	41.04	1024.06	89.19	474.71
13.55	40.71	1019.13	75.44	467.21
6.39	35.57	1025.53	77.23	487.69
26.64	62.44	1011.81	72.46	438.67
7.84	41.39	1018.21	91.92	485.66
21.82	58.66	1011.71	64.37	452.16
27.17	67.45	1015.67	49.03	429.87
13.42	41.23	994.17	95.79	468.82
20.77	56.85	1012.4	83.63	442.85
8.29	36.08	1020.38	81.53	483.26
30.98	67.45	1015.18	45.4	433.59
31.96	71.29	1008.39	47.51	433.04
15.83	52.75	1024.3	58.34	458.6
22.56	70.79	1005.85	93.09	435.14
25.91	75.6	1018.23	62.65	443.2
8.24	39.61	1017.99	78.42	477.9
24.66	60.29	1018	59.56	445.26
29.31	68.67	1006.18	63.38	435.57
21.48	66.91	1008.58	84.49	447.42
18.28	44.71	1016.99	33.71	462.28
26.96	65.34	1015.05	46.93	441.81
16.01	65.46	1014	87.68	454.16
27.37	63.73	1009.79	65.25	437.24
16.3	39.63	1004.64	85.61	464.11
23.8	48.6	1002.43	67.32	440.89
8.19	41.66	1016.57	75.38	485.2
25.28	67.69	1009.05	68.54	445.34
21.47	70.32	1011.72	88.36	440
30.54	67.45	1014.37	32.97	431.35
18.3	44.06	1017.95	63.24	456.32
25.82	72.39	1003.4	86.33	432.98
31.12	69.13	1009.61	56.54	429.41
15.99	39.63	1006.09	89.92	464.95
8.42	42.28	1008.4	87.78	481.91
23.7	69.23	1011.73	73.18	437.15
15.71	40.12	1012.81	97.46	462.6
29.11	74.9	1003.31	74.01	432.43
23.73	61.02	1009.71	78.7	442.22
28.26	65.34	1014.56	43.4	441.03
15.92	41.2	1016.04	73.37	468.91
33.4	70.8	1009.17	57.01	432.46
31.92	68.3	1015.58	41.55	430.07
26.87	74.99	1002.48	71.91	437.78
5.23	40.78	1025.13	92.74	483.12
15.72	41.76	1023.07	66.95	462.19
17.74	50.88	1015.56	89.78	457.71
27.13	59.54	1004.33	73.27	438.32
25.82	66.49	1013.2	60.32	434.35
34.2	68.14	1002.7	56.09	427.05
19.13	68.61	1010.65	94.92	448.69
11.77	41.06	1021.45	76.63	475.88
10.25	41.46	1018.67	84.41	479.28
23.82	48.92	1010.48	44.45	446.85
30.1	66.25	1009.38	65.41	434.99
29.92	69.75	1009.12	67.15	441.5
29.63	66.75	1018.08	58.46	433.26
30.61	77.17	1009.49	73.19	430.46
16.18	50.88	1014.06	100.09	455.14
31.66	73.91	1004.49	68.13	431.26
29.14	61.5	1009.64	39.95	437.76
18.4	43.96	1012.4	77.81	464.63
15.86	38.62	1016.65	67.51	462.58
6.31	42.07	1004.61	77.74	483.27
23.4	72.99	1009.48	88.82	438.51
33.62	77.17	1009.38	63.71	431.03
6.89	43.65	1019.87	72.77	484
27.41	69.98	1008.51	65.49	431.64
26.37	54.5	1014.48	66.31	451.78
26.58	59.39	1014.49	65.87	439.46
15.25	43.02	1012.04	41.43	467.23
21.24	41.67	1012.6	49.27	459.81
24.98	58.05	1011.69	69.97	447.15
26.63	64.44	1012.66	61.19	442
18.87	52.08	1005.25	99.19	449.61
5.12	40.78	1025.45	96.88	481.28
31.1	71.32	1008.09	45.87	437.54
7.91	39.96	1023.57	88.44	475.52
14.97	58.2	1019.52	81.13	458.68
28.92	61.02	1011.19	56.13	436.76
22.92	61.9	1013.27	78.32	446.08
12.55	38.91	1012.58	75.44	474.35
9.38	41.44	1015.09	86.8	481.96
10.28	41.46	1018.44	85.23	479.66
30.31	77.24	1008.02	67.84	435.28
25.34	71.06	1007.74	92.52	434.86
30.47	70.02	1009.65	62.03	435.72
20.18	56.53	1020.3	77.1	454.14
21.31	46.97	1014.08	62.57	455.76
22.1	74.87	1009.4	85.78	442.83
20.09	63.94	1020.82	74.16	449.47
22.36	58.79	1016.69	73.6	445.76
9.43	37.14	1013.03	74.99	473.57
28.86	49.3	1003.93	52.85	435.75
23.25	70.32	1009.28	86.52	437.96
22.7	60.84	1019.15	71.48	438.59
21.3	59.39	1013.83	84.53	444.21
19.94	44.9	1008.52	74.69	459.47
14.97	43.67	1011.13	87.33	465.54
13.83	40.78	1024.85	73.08	458.85
23.39	71.25	1005.22	93.7	435.68
21.48	47.43	1006.88	63.54	449.2
22.63	58.41	1013.69	90.32	445.43
20.01	45.09	1014.21	38.19	453.96
20.52	43.79	1015.9	68.1	463.93
13.58	49.83	1008.9	86.8	465.82
14.38	44.84	1024.59	81.68	471.6
28.53	69.84	1004.46	68.03	427.72
13.89	35.71	1016.4	65.49	468.54
25.93	69.34	1008.91	79.43	434.08
17.84	61.27	1020.1	70.68	454.57
6.28	41.06	1020.96	90.91	489.79
8.16	39.64	1011.21	85.56	481.78
18.61	67.71	1004.07	84.49	443.57
16.23	43.72	1009.96	83.01	457.9
8.66	41.01	1022.51	98.55	472.16
19.53	66.54	1013.72	81.46	451.19
10.17	40.46	1018.54	68.21	470.33
6.48	40.27	1010.55	82.12	486.68
12.69	40.75	1016.05	82.92	472.68
23.77	61.87	1009.8	54.83	445.72
14.43	43.5	1021.86	83.14	466.58
28.25	57.19	1007.99	67.9	436.99
12.26	39.96	1011.79	79.06	470.87
14.55	42.74	1027.29	66.64	457.77
24.57	51.95	1005.8	70.07	448.15
10.25	41.26	1007.44	98.08	476.03
21.96	51.43	1007.28	89.96	442.87
9.82	39.64	1010.79	69.22	477.93
18.58	44.6	1016.61	48.15	459.06
20.57	44.9	1008.39	62.69	456.18
8.61	41.04	1024.81	95.6	473.62
9.99	43.52	1022.95	99.67	473.64
13.97	52.05	1012.05	85.36	463.64
16.76	43.67	1011.27	70.55	462.44
25.58	47.01	1014.5	63.53	454.39
17.34	46.48	1007.18	83.15	452.06
19.13	66.86	1012.95	71.24	453.31
12.75	40.64	1020.44	83.17	466.93
29.46	49.3	1003.88	54.1	436.37
15.59	52.75	1024.3	59.93	458.87
14.2	43.02	1012.18	57.07	470.67
14.05	40.35	1011.52	66.21	475.54
32.35	77.95	1014.76	60.88	432.72
21.41	56.9	1007.03	79.41	441.41
10.61	37.5	1008.8	100.13	472.9
19.13	40.79	1004.47	91.7	457.83
17.28	44.06	1018.15	66.93	462.05
24.79	50.78	1008.78	61.88	445.3
28.66	50.05	1006.08	47.74	435.94
12.91	41.16	1011.9	89.19	472.71
17.32	43.7	1015.13	61.66	464.5
18.74	59.21	1018.3	91.55	449.77
26.69	70.36	1006.82	68.29	435.04
12.28	40.55	1005.72	98.56	472.47
14.46	44.78	1007.64	67.03	459.31
30.54	70.17	999.42	64.32	434.62
27.58	66.48	1004.82	51.23	435.34
32.17	73.21	1001.43	69.86	430.64
26.23	59.87	1012.93	66.62	447.16
11.69	35.76	1019.02	55.6	471.72
14.73	39.82	1012.67	80.82	470.41
12.36	48.04	1012.8	93.59	468.37
9.52	40.96	1023.48	86.49	483.59
27.32	73.42	1012.07	86.3	432.74
23.81	73.17	1012.13	86.13	438.11
7.92	42.28	1008.55	81.68	484.75
23.58	58.82	1009.68	81.38	445.01
20.78	60.84	1018.66	80.4	445.82
19.68	68.28	1002.62	71.57	452.47
14.12	40.92	1022.46	73.28	459.76
22.97	62.4	1010.25	75.18	445.3
6.89	39.37	1020.21	74.17	486.9
19.98	56.53	1020.22	73.53	454.89
21.71	60.27	1015.74	89.76	441.19
23.02	59.21	1011.74	83.18	440.5
27.71	69.51	1009.65	58.38	435.04
10.46	37.5	1013.12	76.74	472.16
27.18	62.66	1009.89	52.83	442.16
25.56	50.05	1005.67	69.29	442.49
19.69	39.72	1001.49	60.34	456.55
31.37	76.86	997.34	62.94	431.03
14.17	41.67	1013.4	72.77	471.42
15.6	43.71	1024.88	80.37	463.34
25.3	71.58	1010.18	87.36	433.97
7.09	39.37	1020.07	73.26	487
6.07	41.14	1027.57	86.98	480.19
9.86	38.38	1018.22	85.35	479.56
14.73	40.35	1011.15	65.2	470.03
31.32	74.33	1012.92	36.48	429.57
6.14	38.5	1012.4	75.35	489.26
27.92	69.23	1013.21	44.43	435.62
25.63	58.86	1014.86	52.75	443.84
16.37	36.99	1006.37	90.11	463.76
28.31	65.71	1014.67	59.29	447.26
24.44	69.84	1005.34	80.37	430.3
11.33	41.5	1013.58	88.7	475.01
23.87	63.94	1019.02	44.28	445.11
21.14	48.78	1020.39	86.2	450.35
22.24	60.07	1015.93	62.25	446.14
23.07	70.47	1008.64	83.37	439.04
25.95	59.14	1016.42	67.03	438.46
16.44	43.96	1013.66	76.31	468.57
20.66	41.54	1014.68	79.7	461.55
15.01	39.52	1017.53	72	468.02
20.51	63.86	1020.65	75.36	447.18
24.1	52.84	1006.47	47.58	444.69
9.38	40.46	1019.29	75.77	474.1
27.49	71.94	1008.25	68.29	428.27
32.84	68.14	1003.59	43.88	425.18
20.83	44.78	1008.51	35.9	460.6
28.69	67.25	1017.71	44.6	436.21
9.35	44.03	1011.02	88.11	476.25
17.37	41.23	998.79	68.44	461.08
14.84	41.48	1017.26	63.42	460.3
27.88	68.94	1007.68	75.68	435.04
17.83	43.72	1008.64	78.72	453.86
7.64	42.28	1008.46	84.29	484.78
25.67	74.78	1010.24	68.87	440.48
23.1	51.3	1011.93	80.05	452.17
27.13	69.45	1013.9	51.16	434.47
26.95	70.8	1009.73	82.95	436.8
19.4	42.44	1013.19	58.63	459.76
13.5	44.92	1023.87	87.17	468.85
11.97	41.04	1026.42	70.75	468.81
18.11	58.95	1016.61	89.17	454.29
24.1	71.29	1007.96	67.56	442.8
20.29	65.27	1013.17	74.94	445.52
21.82	65.27	1013.86	72.81	447.43
29.45	75.6	1018.12	50.68	437.31
10.87	38.38	1020.85	69.78	477.03
17.36	39.53	1008.28	68.87	456.57
24.97	58.95	1017.19	56.24	440.03
13.72	45.09	1012.95	87.41	466.24
26.49	61.86	1012.55	74.24	440.21
8.25	41.26	1020.59	91.84	475.17
12.8	44.9	1007.58	66.6	466.95
17.08	40.12	1012.17	81.5	457.81
31.4	71.06	1008.44	74.77	433.34
8.26	44.71	1020.85	68.82	485.19
21.22	59.15	1014.68	59.71	450.96
26.1	62.91	1012.44	60.91	446.05
19.91	51.19	1008	90.23	449.23
14.56	40.69	1015.48	73.73	469.31
10.22	41.74	1022.65	83.58	479.01
29.12	67.83	1008.05	46.86	432.46
16.97	39.16	1005.7	69.13	458.59
26.19	49.3	1003.69	65.88	440.13
23.65	66.05	1019.6	78.21	442.9
29.53	70.94	1007.22	70.68	432.43
19.69	56.65	1020.84	72.14	455.07
33.71	69.98	1013.09	42.62	431.99
32.14	75.08	1005.35	49.92	439.22
29.28	77.17	1009.4	76.3	433.14
7.01	37.8	1021.47	62.84	483.95
30.47	68.24	1009.55	64.98	427.94
29.13	47.93	1002.5	49.1	435.61
11.86	39.85	1013	66.92	478.29
26.16	52.36	1013.62	58.52	453.08
10.56	39.13	1010.19	87.12	463.14
8.58	40.72	1022.04	87.55	480.96
14.26	40.92	1022.07	73.96	460.38
23.48	73.67	1007.07	88.49	437.19
5.54	45.87	1008.69	95.91	478.02
16.98	43.99	1021.65	81.17	456.07
30.08	67.25	1017.6	53.09	434.01
10.63	39.61	1020	72.42	476.99
30.36	74.87	1008.96	61.87	435.31
29.56	70.4	1006.49	82.95	432.85
19.94	56.53	1020.48	76.43	453.8
27.55	64.96	999.73	57.34	431.33
31.44	79.74	1006.95	56.99	431.69
25.35	74.33	1015.29	77.84	435.66
4.11	38.44	1015.9	81.79	488.05
30.59	70.04	1010.28	50.56	429.13
14.04	48.79	1017.62	75.25	464.09
15.47	44.9	1021.59	81.74	465.61
8.67	40.77	1011.81	89.4	479.23
10.53	37.5	1008.55	99.91	472.32
7.99	41.38	1021.95	78.77	487.57
22.29	45.01	1012.4	51.58	449.08
9.06	36.3	1015.14	58.71	477.38
10.05	37.14	1012.64	75.97	474.16
20.07	49.21	1012.34	56.8	454.25
30.65	71.98	1004.92	63.39	429.85
14.38	40.73	1017.48	90.64	462.98
27.76	71.97	1008.53	86.97	434.04
16.7	40.56	1019.04	50.9	470.84
5.35	35.57	1027.12	80.81	488.65
11.57	41.38	1021.71	61.49	473.94
30.57	73.03	1013.75	73.68	437.42
16	40.66	1016.12	89.23	457.12
15.6	41.04	1025.48	64.43	457.49
22.12	47.93	1005.5	84.47	443.41
21.33	58.46	1016.17	79.73	445.27
23.65	59.92	1010.19	89.53	436.74
6.8	39.37	1020.24	73.29	487.33
31.35	71.32	1005.99	62.35	434.43
23.99	68.12	1012.92	70.68	437.14
26.53	54.2	1012.9	66.73	439.96
31.59	62.7	1009.3	50.16	442.58
24.06	69.94	1005.47	60.46	436.88
27.28	44.89	1009.02	49.9	441.94
23.69	71.97	1009.62	93.03	438.62
11.46	39.1	1010.17	100.15	470.55
22.61	49.3	1003.51	83.02	441.76
21.84	45.09	1013.94	46.11	450.88
9.2	39.82	1013.19	91.25	482.89
17.75	49.25	1020.86	63.67	454.41
7.53	43.65	1018.58	64.85	479.15
16.76	45.09	1014.28	57.71	458.67
22.69	65.12	1016.35	72.02	446.91
11.91	44.45	1021.39	84.49	466.52
26.63	61.47	1008.18	69	444.16
6.72	39.85	1011.84	84.66	489.09
9.44	43.99	1020.31	98.06	475.01
18.32	45	1022.67	46.38	471.43
18.31	62.1	1020.38	79.02	455.24
26.57	44.57	1007.76	50.39	445.49
34.33	69.05	1000.89	37.9	430.56
14.85	40.8	1025.38	53.29	471.78
29.33	64.84	1010.76	53.32	443.15
8.77	40.46	1019.68	77.84	475
11.35	38.91	1017.93	83.45	474.22
21.38	44.05	1005.69	81.66	445.71
4.88	40.27	1012.66	74.51	491.29
26.66	64.27	1012.83	58.88	437.87
13.04	45.09	1013	87.68	467.44
29.47	71.32	1008.07	67	437.14
18.91	56.9	1006.98	84.07	448.24
24.86	44.05	1005.69	66.65	447.2
9.42	41.4	1029.6	87.43	478.12
12.75	42.34	1018.17	94.67	465.44
21.32	49.02	1008.81	85.81	445.65
24.26	67.69	1008.48	66.74	437.4
20.01	43.77	1012.13	65.53	455.66
21.35	59.04	1012.28	95.71	445.83
17.43	63.09	1019.87	92.77	449.36
27.86	65.18	1012.87	55.53	436.26
20.74	59.8	1015.46	76.39	452.99
27.73	67.69	1007.47	59.42	431.72
9.53	41.44	1018.01	80.09	481.83
28.5	79.74	1006.75	87.09	433.08
21.39	52.3	1009.2	79.77	446.87
14.54	46.18	1015.29	94.48	463.03
28.01	65.34	1014.68	46.86	440.77
30.51	70.94	1007.64	59.42	430.91
21.63	60.84	1018.16	77.53	445.93
26.39	71.25	999.8	89.12	430.34
13.84	41.26	1020.92	74.74	462.46
17.27	43.52	1021.37	76.73	460.08
21.89	58.05	1011.31	85.71	441.76
24.02	64.63	1020.49	55.17	449.66
31.92	75.33	1001.81	61.97	436.38
12.97	49.83	1008.69	91.49	452.07
15.89	43.96	1014.02	75.24	467.35
9.25	41.26	1020.51	91.21	473.87
15.99	43.5	1021.34	73.22	460.7
9.06	39.66	1019.64	76.98	479.53
14.48	44.06	1018.73	75.88	467.46
27.15	59.21	1013.49	51.71	440.27
21.68	64.15	1021.09	70.88	454.32
28.16	61.47	1009.19	62.53	442.48
34.33	74.34	1001.74	42.75	435.76
31.98	64.05	1010.49	58.01	439.56
15.21	43.56	1012.92	56.61	467
13.56	42.34	1017.95	93.83	462.6
10.32	42.02	998.27	99.12	472.16
22.46	58.49	1011.5	70.54	448.46
29.3	68.08	1011.23	56.23	434.11
22.3	44.57	1008.48	67.58	449.74
21.91	70.32	1009.17	90.57	439.29
10.95	43.8	1022.61	63.46	473.2
24.96	68.12	1011.27	70.22	437.62
5.91	39.33	1010.18	95.53	491.49
5.25	40.07	1019.48	67.7	495.23
21.47	60.93	1006.46	87.83	442.75
10.16	39.3	1019.71	81.21	480.74
17.29	44.06	1016.24	77.56	461.38
17.46	40.22	1006.7	91.96	461.74
11.56	40.43	1025.48	74.75	489.54
7.51	41.01	1024.61	97.41	477.61
17.08	38.58	1015.41	73.42	461.49
9.27	42.02	1004.29	95.05	474.93
21.3	48.92	1010.92	65.09	447.89
8.51	40.81	1015.54	83.16	481.02
12.77	41.5	1014.13	86.8	470.68
25.04	65.48	1017.66	57.08	440.92
21.83	41.1	1001.91	41.79	453.38
15.92	41.79	1006.24	79.42	458.68
29.97	69.14	1007.92	66.74	433.82
9.8	41.82	1032.98	67.55	473.72
9.01	38.56	1016.67	63.61	482.37
24.71	61.9	1013.78	85.82	443.39
20.57	63.78	1016.76	74	449.93
24.32	65.48	1017.55	59.02	443.31
21.41	50.32	1008.61	84.47	443.63
27.09	59.15	1013.02	55.18	438.9
23.49	47.45	1008.46	66.18	446.72
20	63.31	1017.06	63.1	449.68
13.4	41.58	1020.5	71.17	461.54
23.6	60.08	1017.51	63.02	451.97
21.03	70.02	1010.21	95.69	444.53
5.15	45.87	1008.02	98.36	479.61
17.16	58.86	1016.4	86.39	453.76
24.59	71.94	1006.89	88.52	430.28
23.05	65.94	1010.99	69.73	442.39
10.48	37.5	1009.81	95.26	474.57
15.72	43.02	1011.98	45.74	466.33
25.56	70.32	1009.07	90.63	433.72
13.78	41.16	1021.65	75.77	460.44
29.35	69.04	1008.55	61.78	445.04
32.09	79.74	1006.92	61.5	432.85
25.16	77.3	1000.73	86.4	439.37
14.63	40	1018.03	63.4	457.09
5.7	40.35	1012.18	91.57	488.8
28.15	74.9	1003.67	76.32	433.63
22.3	57.19	1006.4	75.28	445.1
27.71	72.99	1007.18	72.68	433.01
23.09	45.01	1012.25	43.95	453.45
19.66	42.18	1001.51	95.75	454.46
10.02	52.75	1021.93	73.68	473.09
23.97	68.67	1006.63	76.83	441.53
7.82	38.91	1015.58	90.11	479.15
30.21	69.4	1003.69	62.89	438.18
24.12	62.44	1013.83	88.02	443.3
21.05	63.09	1016.49	91.23	447.45
13.93	40.24	1017.88	88.35	469.25
9.68	41.06	1022.75	87.44	476.67
17.48	49.39	1021.51	84.53	460.01
28.76	66.56	1006.07	62.41	432.3
19.21	53.16	1013.18	81.64	454.01
25.63	72.99	1008.2	86.8	436.64
20.36	66.05	1015.86	87.19	450.23
15.34	40.73	1018.03	86.19	458.55
9.55	40.72	1023.12	68.06	481.08
13.45	41.16	1022.04	82.96	460.57
10.8	39.58	1011.99	87.54	478.24
28.15	72.99	1007.62	70.03	431.83
15.42	40.56	1021.23	59.37	469.33
33.6	74.33	1012.31	35.66	428.62
30.92	78.05	1011	59.62	434.12
25.24	57.17	1010.44	74	442.77
13.6	41.2	1015.92	85.05	467.42
18.68	46	1002.2	97.17	447.8
22.43	69.84	1006.94	75.54	436.19
23.37	70.94	1008.01	81.28	441.56
19.62	43.56	1012.89	37.6	463.33
14.35	39.39	1012.92	82.41	470.53
24.88	63.91	1009.41	77.75	447.28
20.67	63.56	1013.27	79.39	450.7
34.11	73.56	1006.77	45.92	432.78
19.15	44.89	1009.6	74.52	451.09
24.96	70.47	1007.73	76.48	438.23
18.86	42.18	1001.16	98.58	457.07
25.1	60.37	1005.83	72.53	438.44
10.15	43.41	1018.4	82.07	473.43
26.53	65.18	1012.77	64.37	437.39
26.05	46.21	1011.31	55.25	450.86
25.45	74.33	1015.53	80.95	435.12
8.14	39.96	1023.41	88.86	477.05
31.95	67.17	1007.11	61.58	432.6
30.8	73.56	1007.39	75.78	432.43
7.69	43.02	1014.51	85.23	486.46
15.3	43.67	1011.75	95.31	468.14
27.12	70.32	1009.94	52.67	429.08
25.76	74.87	1010.18	65.15	443.7
10.28	39.64	1010.45	74.15	477.65
30.91	79.74	1006.92	56.32	433.84
24.22	61.86	1013.39	80.11	442.65
5.67	45.87	1008.91	93.29	478.44
22.96	68.61	1011.15	76.62	447.18
24.54	65.46	1014.27	40.77	446.26
11.32	36.18	1015.03	64.68	472.67
15.15	53.82	1016.34	62.59	461.6
23.53	50.05	1005.63	78.4	443.71
29.08	66.54	1004.67	64.5	430.16
20.42	60.77	1017.65	87.07	447.85
26.32	69.71	1009.39	67.05	441.25
21.89	74.93	1016.11	77.88	448.47
9.68	41.48	1018.24	71.04	473.31
16.73	54.3	1017.96	59.44	460.54
7.8	39.04	1018.46	66.5	482.31
23.29	65.61	1014.81	70.27	447.67
28.93	72.99	1007.23	64.41	434.45
16.75	42.23	1013.81	84.98	464.87
21.47	58.79	1017	76.97	446.33
25.98	68.12	1011.36	66.86	439
16.34	36.99	1006.99	90.06	466.24
25.23	69.34	1009.51	82.87	445.92
12.41	41.44	1015.46	76.9	472.06
24.2	60.77	1016.92	71.65	439.13
7.51	41.66	1015.9	78.31	485.58
31.53	70.94	1007.11	50.04	431.84
17.42	44.06	1016.63	82.15	456.57
6.92	39.61	1018.64	82.27	483.83
8.34	40.72	1023.62	83.75	483.14
32.07	67.83	1007.91	41.61	429.31
27.18	64.79	1016.27	63.7	443.87
9.24	41.4	1030.72	87.36	476.9
13.48	46.18	1018.15	88.38	464.58
22.74	61.02	1009.56	79.41	445.56
28.62	68.24	1010.15	69.31	428.08
25.11	62.26	1011.12	78.01	434.97
11.47	43.67	1012.68	72.51	475.72
29.51	75.6	1017.92	50.61	431.18
15.24	39.39	1013.01	74.24	469.79
22.71	75.23	1010.48	76.86	444
13.98	39.18	1009.61	89.12	467.97
17.89	40.12	1011.99	76.52	451.79
12.81	44.58	1016.49	80.76	475.5
15.54	41.96	1011.78	97.46	467.1
20.21	54.9	1016.82	66.56	454.23
6.17	36.25	1028.68	90.59	483.77
26.42	59.54	1007.02	76.28	438.5
14.6	44.47	1028.46	69.96	465.24
29.53	72.39	998.47	76.05	431.69
12.95	43.71	1025.63	90.7	469.15
13.26	40.83	1007.97	90.63	472.14
23.48	60.23	1011.91	79.48	437.44
10.16	41.55	1005.69	58.04	477.27
29.13	66.56	1006.63	52.85	439.31
10.8	41.74	1020.24	78.62	479.32
25.21	75.6	1017.19	69.84	445.84
20.72	44.57	1008.96	72.57	449.76
26.17	59.92	1010.01	73.75	444.96
17.48	44.2	1018.89	61.51	457.15
29.67	73.67	1006.48	64.98	429.28
26.38	71.73	1010.04	69.45	431.66
12.08	41.39	1019.45	78.3	477.8
25.3	70.98	1007.22	95.1	440.86
16.55	39.64	1009.07	77.8	465.29
13.18	43.8	1023.18	61.21	467
21.34	51.61	1010.11	80.7	452
20.06	44.9	1008.79	70.06	448.51
8.26	39.42	1025.89	70.53	474.72
8.51	38.5	1013.33	64.28	482.39
8.83	36.25	1028.86	85.6	478.45
14.52	44.84	1023.51	88.51	466.88
7.87	43.02	1014.67	83.58	485.61
7.14	44.71	1019.98	71.9	487.71
7.49	36.08	1020.27	85.69	483.26
11.01	40.22	1011.13	83.09	476.69
20.74	58.2	1017.54	70.66	450.4
30.98	67.48	1009.96	58.92	439.39
26.67	70.94	1007.7	56.56	439.13
28.24	71.58	1010.1	67.92	434.01
11.98	39.35	1014.97	98.05	472.43
30.91	69.75	1010.23	59.36	435.7
23.23	63.31	1012.52	75.1	441.5
30.13	78.05	1010.99	61.5	434.14
20.79	65.59	1014.9	77	450.3
14.38	45.09	1012.95	86.1	464.27
10.07	40.46	1018.65	69.2	470.99
10.48	41.38	1021.97	65.22	481.41
6.86	41.17	1020.12	79.14	490.23
13.25	41.62	1010.8	77.81	457.64
26.92	51.43	1012.29	59.33	437.35
12.76	40.27	1006.58	49.34	474.03
30.2	73.67	1006.31	62.14	428.72
10.72	41.38	1021.6	63.77	478.29
17.39	46.21	1013.94	82.73	454.06
30.97	67.69	1005.61	50.88	425.35
28.16	71.94	1007.69	68.17	430.46
28.84	73.03	1013.99	76.05	435.75
24.48	64.45	1014.69	51.43	452.82
11.23	39.72	1018.46	60.62	475.04
13.52	42.07	1017.91	90.21	464.07
16.61	45.87	1009.34	97.93	455.86
20.96	61.27	1019.99	67.32	448.77
32.15	69.98	1013.3	55.13	429.86
21.24	44.57	1008.72	72.57	447.03
26.49	78.92	1010.82	83.42	434.91
24.01	65.46	1014.17	43.02	443.81
33.15	70.4	1003.72	53.98	430.15
20.13	40.33	1005.31	85.42	460.09
21.41	62.39	1007.84	88.83	452.8
31.35	70.8	1010.11	66.37	432.19
27.44	58.9	1003.86	66.74	442.19
25.21	51.43	1006.43	78.55	439.01
32.06	75.33	1001.96	63.15	432.92
25.04	51.95	1005.56	66.53	449.45
13.31	40.1	1014.81	82.11	468.74
29.68	64.33	1011.2	57.73	441.79
13.46	44.71	1014.51	50	474.6
18.77	49.39	1021.06	82.95	454.53
13.56	39.18	1023.4	63.82	470.38
20.65	66.51	1014.94	71.83	456.49
26.5	66.05	1017.03	61.34	440.15
23.67	72.24	1011.22	90.45	435.94
8.64	41.66	1014.14	80.44	481.89
20.2	50.9	1011.72	77.63	454.09
5.04	40.64	1021.35	93.63	484.42
23.59	59.43	1009.96	65.8	440.61
17.47	58.16	1016.36	82.26	456.97
6.02	43.65	1013.85	83.53	481.92
30.05	56.9	1007.02	41.96	437.55
29.23	68.14	1004.31	81.46	428.87
26.03	64.44	1012.75	62.24	445.89
26.38	49.5	1012.82	37.19	457.81
5.66	40.62	1015.87	84.97	485.18
27.65	48.41	1008.54	58.25	440.94
17.88	46.97	1013.73	67.78	456.77
11.2	37.5	1013.81	72.81	472.2
20.94	58.16	1016.88	65.43	455.16
20.64	49.21	1014.86	58.47	454.2
19.21	60.07	1014.94	70.02	452.84
13.22	44.92	1023.84	87.99	471.43
33.6	77.17	1009.01	47.53	430.32
27.83	59.57	1011.22	71.05	443.85
21.11	58.49	1011.6	80.44	449.16
30.47	77.3	1002.13	63.7	434.68
15.48	47.83	1004.88	81.68	463.67
20.25	44.78	1007.93	40.16	462.44
15.87	39.31	1009.95	66.78	460.59
22.57	62.4	1009.77	86.05	444.69
12.67	48.14	1017.41	83.63	463.68
21.41	54.2	1011.37	82.28	448.11
30.86	70.32	1011.88	62.68	433.71
23.64	60.95	1014.92	64.91	447.86
5.52	42.85	1012.77	93.82	478.98
11.06	40.64	1021.47	96.16	479.13
24.41	56.9	1006.58	77.94	439.51
10.28	39.61	1020.43	69.09	478.34
14.67	71.14	1019.84	77.72	458.8
25.15	57.32	1012.41	41.84	440.1
21.5	44.58	1016.87	57.58	460.2
7.74	39.96	1025.78	95.81	475.23
21.31	42.8	1014.1	75.77	459.84
29.92	67.22	1014.09	50.62	444.78
4.15	39.9	1007.62	95.69	489.8
15.95	42.24	1017.71	69.32	465.35
25.01	66.56	1004.55	82.46	434.74
27.17	67.17	1006.76	81.59	431.73
28.14	43.21	1011.82	69.32	436.53
13.93	44.47	1025.35	81.54	469.25
25.83	70.47	1006.24	81.83	434.45
24.4	60.32	1016.5	70.96	447.73
26.35	69.48	1008.45	70.47	435.23
30.99	69.82	1009.41	50.84	437.46
25.82	57.19	1007.99	62.95	440.8
28.37	75.6	1017.48	55.19	439.25
29.28	74.33	1011.66	72.37	426.53
18.35	57.76	1019.64	77.94	458.41
16.69	46.18	1010.8	96.8	466.03
9.59	37.14	1013.8	72.85	474.74
10.11	39.35	1015.19	90.74	479.83
17.37	57.76	1016	86.59	456.4
20.92	49.15	1021.15	49.76	455.32
22.82	64.63	1020.78	66.73	449.34
23.55	51.95	1006	76.46	449.54
30.47	70.83	1010.91	46.94	444.39
13.16	40.71	1021.99	77.91	475.87
6.25	39.64	1010.98	83.45	483.43
16.98	53.16	1013.95	82.8	458.93
27.5	68.24	1010.38	73.44	430.9
24.39	63.21	1012.59	80.88	446.4
14.69	54.3	1018.01	73.4	462.63
26.31	72.39	1001.16	88.43	434.53
14.85	58.59	1014.04	89.85	454.62
21.95	59.43	1010.29	74.67	442.84
31.91	67.83	1008.76	53.22	425.28
16.2	65.46	1013.97	89.84	451.86
27.35	77.95	1012.14	74.14	431.72
8.73	41.26	1020.54	91.37	476.42
14.13	53.82	1016.72	64.85	467.08
13.18	40.24	1016.81	86.71	469.35
10.74	40.92	1021.74	94.97	466.77
6.28	43.02	1013.72	88.13	487.17
6.04	41.14	1027.92	87.12	481.37
16.78	58.95	1017.74	96.24	450.02
14.99	41.35	1004.56	98.9	466.85
26.26	65.06	1013.58	52.72	440.92
32.09	70.4	1003.73	55.65	434.64
22.88	63.91	1009.63	87.82	442.5
21.95	68.08	1012.91	69.36	443.93
26.65	63.78	1015.32	53.95	440.26
12.57	39.3	1019.57	72.44	473.67
15.67	41.1	1004.1	77.93	466.45
27.97	69.48	1010.4	57.24	432.18
13.76	45.87	1008.89	87.27	463.5
26.91	70.47	1007.55	72.59	434.24
25.18	71.98	1006.71	89.86	432.88
23.27	64.15	1020.98	71.18	452.26
23.2	73.17	1012	89.92	438.64
18.55	52.84	1004.45	86.82	450.23
7.23	41.22	1015.23	98.04	483.31
7.3	39.72	1020.85	77.83	485.1
13.93	39.64	1011.8	82.64	470.84
20.33	57.76	1016.47	75.35	450.25
32.2	72.29	1008.61	69.94	432.52
13.16	43.41	1016.43	79.47	465.6
27.26	73.18	1012.58	74.83	429.92
12.45	43.67	1013.61	91.34	474.27
12.04	40.23	1018.07	81.28	472.7
28.12	73.42	1011.49	80.16	435.46
27.21	67.45	1013.83	43.26	436.47
26.97	64.45	1009.43	53.96	443.75
26.99	72.99	1008	76.1	430.81
21.25	67.71	1006.9	55.76	444.98
30.33	68.67	1006	54.99	435.53
15.37	50.59	1019.02	98.2	463.35
25.8	44.57	1008	52.56	450.48
24.97	68.61	1011.08	58.94	447.83
15.98	39.64	1009.31	81.21	467.22
24.82	71.94	1010.5	64.67	438.69
21.32	45.01	1012.23	59.94	452.75
8.28	40.56	1023.29	79.44	486.4
27.22	67.9	1005.73	57.29	441.22
26.94	62.91	1011.68	41.3	449.1
18.86	46.48	1007.28	78.47	452
9.61	44.03	1008.3	91.36	473.54
26.2	65.18	1011.42	47.82	440.07
12.31	44.78	1011.15	77.34	468.29
16.48	48.92	1011.84	64.16	458.67
14.07	42.99	1007.57	96.05	468.87
25.19	63.94	1012.78	75.15	438.73
15.41	42.44	1012.6	86.74	472.28
13.16	43.71	1024.44	85.68	469.06
18.63	45.87	1007.98	79.9	453.79
16.94	50.59	1018.75	94.22	460.64
14.85	45.87	1009.37	84.65	462.67
24.56	63.21	1013.79	82.38	444.34
23.13	72.24	1010.92	92.3	437.67
26.84	71.94	1006.6	79.12	427.2
9.36	44.03	1010.3	87.2	474.68
30.19	64.79	1017.22	42.47	438.41
14.78	42.86	1015.32	84.75	471.17
18.6	68.28	1003.27	84.21	446.98
7.19	39.4	1011.45	90.65	483.04
29.15	73.42	1011.43	66.49	432.26
15.23	37.87	1020.17	85.02	464.02
9.19	41.01	1022.14	98.98	468.37
16.38	46.97	1013.6	73.67	459.87
18.23	60.95	1016.74	78.85	455.53
24.62	70.47	1010.55	72.71	435.88
5.72	39.33	1009.96	95.4	490.76
23.19	67.07	1005.67	65.19	442.45
13.21	40.56	1018.12	64.49	475.86
9.77	34.69	1027.72	74.98	477.51
30.82	70.36	1006.47	58.79	439.16
23.63	58.62	1016.45	69.97	445.51
24.66	48.78	1018.39	71.79	449.11
8.83	41.14	1025.37	94.36	474.51
14.79	46.48	1007.46	92.4	462.55
3.69	38.44	1016.74	82.87	490.78
24.03	66.54	1012.19	69.15	438.08
13.23	42.34	1018.02	97.49	462.21
25.79	67.17	1007.89	81.38	440.75
25.72	59.21	1012.37	66.62	437.72
11.8	41.54	1020	65.85	476.12
16.52	42.24	1017.51	67.65	469.13
23.51	63.78	1016.1	69.79	446.58
25.25	58.46	1015.54	70.76	444.05
19.82	58.16	1016.76	74.66	455.5
11.73	37.92	1008.24	65.13	472.04
27.96	73.42	1011.11	71.93	435.93
25.59	72.43	1007.88	82.98	432.49
22.61	59.87	1019.12	66.12	441.2
23.03	65.12	1016.29	69.8	447.84
26.38	44.89	1009.14	51.79	442.13
31.52	76.2	1008.31	57.35	435.31
20.36	60.1	1011.21	84.79	454.25
13.55	43.48	1016.08	67.25	464.33
25.44	61.25	1012.57	87.65	441.77
11.09	41.58	1020.99	91.09	464.81
25.36	60.07	1015.06	66.11	439.73
30.68	71.8	1010.81	61.4	435.4
25.48	60.29	1017.55	51.22	443.77
29.79	62.66	1008.5	48.51	440.27
8.37	39.99	1010.36	93.26	482.31
8.49	43.69	1016.93	85.63	483.62
26.85	74.16	1008.66	93.8	431.16
29.34	71.98	1005.19	75.19	428.24
21.11	58.12	1015.38	77.78	453.28
21.12	62.96	1020.83	69.96	454.65
15.03	35.71	1015.26	56.55	467.61
23.74	62.96	1019.65	63.39	449.48
32.96	69.75	1008.86	40.23	435.56
20.23	52.05	1012.15	47.49	457.57
22.46	58.33	1013.21	68.68	445.9
11.54	45	1022.77	80.79	482.34
24.62	68.31	1010.45	75.18	448.58
10.12	41.55	1005.78	62.34	475.46
15.67	38.62	1015.76	66.29	463.17
21.96	48.6	1004.87	76.27	446.56
11.82	41.54	1019.96	67.65	476.97
19.8	51.19	1008.25	91.98	446.66
22.32	64.27	1014.35	82.98	446.62
19.75	49.02	1009.38	92.89	446.63
25.48	65.12	1016.12	53.66	447.85
14.84	42.03	1017.47	79.27	466.2
21.38	49.21	1012.49	53.77	449.66
18.67	47.83	1005.12	82.97	454.47
26.27	58.33	1013.81	60.43	438.82
27.23	63.9	1014.3	47.19	443.61
20.87	63.31	1012.27	79.51	446.7
19.4	39.53	1007.96	63.38	457.17
21.97	65.61	1016.09	73.29	447.05
17.16	40.55	1000.26	72.21	461.58
13.62	42.34	1017.87	89.67	464.79
13.9	44	1025.1	87.17	466.24
9.45	39.04	1023.08	75.81	483.66
23.66	62.08	1022.42	64.13	447.06
26.91	70.02	1010.75	59.48	445.31
23.04	74.99	1005.44	92.86	437.65
26.93	67.07	1005.65	60.26	437.76
24.59	60.37	1005.31	76.81	438.09
34.63	74.33	1011.7	31.45	428.54
20.48	60.29	1017.16	72.1	455.51
26.55	60.23	1009.88	79.54	438.95
10.74	43.67	1011.75	80.1	477.32
12.28	43.67	1012.69	70.23	475.08
10.8	41.66	1013.79	81.96	475.51
26.26	71.73	1009.59	80.06	430.79
24.9	71.77	1006.24	85.25	427.77
28.41	74.16	1010.29	72.09	439.2
22.72	63.73	1012.63	82.14	448.56
33.4	69.98	1013.29	47.78	432.44
26.35	59.87	1013.24	73.63	447.26
24.58	49.02	1008.85	79.32	442.47
12.76	42.32	1015.35	78.18	466.15
9.64	39.85	1012.9	83.82	478.37
10.91	41.04	1026.57	74.24	469.53
12.27	41.17	1019.39	52.18	473.84
28.4	74.93	1013.65	48.6	442.23
11.04	45.51	1017.53	83.42	474.45
20.75	60.77	1017.91	86.06	448.58
21.31	69.05	1002.46	73.42	440.97
25.4	65.34	1013.11	53.93	445.82
25.95	65.61	1014.36	52.54	443.88
27.44	65.59	1010.76	68.67	441.08
18.42	58.95	1016.95	86.77	452.1
17.48	46.21	1014.02	80.78	455.35
13.87	49.83	1006.76	89.14	462.46
10.06	39.61	1020.87	74.01	476.92
23.21	62.44	1011.78	76.66	442.47
21.44	60.32	1015.2	81.1	448.84
26.73	68.84	1010.75	66.83	440.45
30.96	64.44	1013.63	49.64	437.61
14.6	44.84	1023.58	88.21	464.88
20.28	63.86	1016.04	74.66	447.26
15.47	38.73	1001.13	77.61	467.96
11.71	40.05	1014.49	86.09	471.49
25.77	68.08	1010.99	73.58	433.46
18.13	66.86	1012.9	78.84	454.85
11.2	35.76	1019.24	64.59	473.33
9.78	43.8	1022.25	69.64	477.22
23.85	74.22	1009.99	82.72	441.66
16.7	50.66	1014.86	94.87	457.74
28.41	66.91	1008.22	57.93	440.52
29.64	67.79	1009.99	51.23	440.74
24.39	71.85	1009.73	72.24	438.2
32.39	74.16	1008.53	61.09	431.17
31.56	66.44	1008.91	64.16	430.11
17.72	48.14	1013.26	65.09	457.44
30.85	67.45	1014.53	32.99	430.8
13.19	39.18	1023.67	66.78	469.62
33.79	69.05	1001.62	40.13	435.1
13.99	45	1023.83	77.92	472.55
24.78	57.19	1008.08	65.4	443.62
17.82	56.89	1014.24	77.73	453.83
24.9	67.25	1017.77	66.17	433.71
11.46	44.85	1014.3	63.24	475.33
28.68	70.32	1008.51	45.73	430.48
18.2	45.01	1013.82	68.14	452.21
23.5	50.78	1008.7	57.7	445.09
10.34	41.74	1020.07	79.17	480.84
15.64	38.28	1014.39	76.93	466.51
13.55	42.99	1007.58	97.55	470.82
26.18	68.08	1012.92	55.7	436.51
10.81	45	1023.45	85.89	482.63
28.09	65.27	1013.27	51.96	440
25.32	61.25	1011.56	80.1	436.67
29.23	72.99	1007.04	63.47	431
9	43.13	1020.25	81.32	481.09
17.29	52.72	1024.71	62.32	467.23
13.92	39.58	1012.5	80.28	465.67
30.15	72.51	1009.37	50.64	443.72
23.96	51.3	1011.81	71.81	451.11
17.34	44.06	1015.84	74.88	458.5
14.02	44.47	1028.02	68.97	465.93
29.12	74.87	1009.85	62.51	435.51
10.22	39.64	1010.72	63.05	477.22
27.74	74.78	1010.05	60.82	436.87
16.5	39.72	1003.05	65.99	459.06
20.46	59.21	1018.42	85.89	445.22
27.51	71.29	1009.43	76.92	430.42
13.1	49.83	1007.29	92.79	466.08
31.07	70.32	1011.74	65.91	436.16
10.79	43.56	1015.15	73.01	479.64
22.57	63.94	1013.49	81.61	443.58
33.63	70.4	1004.02	53.6	430.05
22.56	47.43	1006.72	54.82	448.65
20.65	41.67	1012.76	45.27	455.5
24.31	65.94	1011.5	61.61	442.69
25.61	47.43	1008.62	54.51	442.96
9.41	41.54	1019.48	82.19	481.59
6.61	36.24	1013.57	91.8	483.12
13.53	38.73	1004.86	85.38	472.46
10.2	41.46	1020.23	84.54	481.46
9.26	39.61	1021.18	84.58	480.38
12.02	43.69	1016.12	74.07	477.74
14.74	43.71	1024.35	81.53	465.49
8.35	43.79	1016.2	85.23	484.21
19.35	39.72	1002.5	51.24	455.29
26.74	69.89	1013.96	51.82	436.02
12.17	41.58	1013.89	88.98	463.03
13.91	39.35	1014.69	75.51	469.02
16.15	41.85	1016.54	81.58	466.56
28.31	50.05	1005.75	50.17	436.75
32.87	70.8	1009.54	59.85	433.1
29.48	73.21	1000.67	79.35	433.53
29.23	69.59	1009	71.41	437.95
7.71	40.71	1021.53	95.48	471.38
26	70.47	1009.61	74.66	435.05
31.41	74.16	1011.1	57.05	434.88
5.28	45.87	1008.25	97.88	479.91
10.19	44.63	1020.58	91.64	472.45
10.35	40.27	1005.09	92.42	477.8
13.72	54.3	1017.89	79.08	467.05
10.96	37.5	1013.46	79.54	471.05
19.36	39.54	1008.97	58.92	458.75
31.23	75.08	1004.93	46.19	439.14
32.77	71.32	1007.68	42.39	436.95
23.35	71.77	1005.99	90.79	434.6
24.99	51.43	1006.95	79.63	441.45
26.53	69.71	1009.88	76.26	446.17
18.62	65.48	1018.45	73.39	451.94
16.72	53.82	1015.46	66.9	458.25
21.07	67.07	1004.64	86.16	446.05
31.08	59.57	1010.76	60.49	442.88
22.85	60.08	1018.05	67.12	452.5
22.99	56.57	1013.93	78.77	445.44
11.12	44.92	1025.58	93.52	470.82
16.63	43.77	1012.25	75.09	458.66
28.85	59.27	1011.69	51.8	440.3
29.97	70.32	1007.44	53.26	428.42
30.73	69.89	1015	58.9	426.79
27.17	61.02	1011.38	65.32	437.06
30.15	69.88	1007.2	73.67	434.75
13.18	40.83	1007.67	95.44	472.36
28.44	69.84	1003.25	68.24	426.69
34.4	77.95	1009.83	57.86	430.87
23.1	60.08	1017.69	65.44	451.01
28.08	59.14	1016.16	58.08	438.83
30.92	80.18	1010.11	72.47	432.35
26.47	69.51	1009.51	65.02	433.89
7.97	39.04	1018.51	65.17	483.3
30.07	70.98	1007.74	75.68	437.55
20.31	69.94	1009.7	86.53	446.87
13.65	39.28	1012.97	79.64	471.91
24.1	60.29	1008.2	61.81	449.79
32.23	69.13	1000.61	55.1	426.9
17.69	44.34	1019.31	61.12	464.13
5.42	41.38	1020.77	86.02	491.38
32.89	73.68	1014.45	52.34	426.46
26.59	59.92	1009.97	70.09	438.22
28.74	71.14	1011.53	48.6	430.12
9	36.3	1027.11	75.89	480.31
18.5	46.93	1015	66.81	455.63
32.21	71.85	1008.25	58.09	429.15
18.31	46.21	1010.46	82.15	451.75
27.14	64.27	1012.71	54.4	441.68
26.22	49.82	1015.48	55.8	454.2
22.72	69.84	1005.96	83.9	436.7
10.63	42.28	1008.37	92.68	474.97
19.39	51.43	1011.06	94.35	456.25
26.85	73.77	1001.2	90.13	431.24
9.74	41.01	1019.12	98.39	465.8
16.34	42.28	1008.08	52.8	463.29
18.36	62.1	1019.9	79.09	453.5
8.03	37.8	1020.47	60.67	481.51
7.34	40.72	1023.01	80.08	483.92
28.17	72.43	1007.37	68.92	428.88
23.92	66.54	1009.93	62.37	441.9
12.17	40.6	1013.59	88.62	473.76
29.13	70.72	1009.61	67.49	436.9
26.09	60.29	1017.72	50.83	444.71
19.08	41.1	1001.96	62.77	458.94
20.5	51.19	1009	91.79	445.35
23	49.5	1014.15	66.68	454.44
26.08	70.32	1012.32	89	434.24
31.27	69.13	1009.45	57.01	425.48
25.69	73.18	1012.64	86.35	432.82
10.16	40.8	1028.13	86.39	477.49
30.49	70.32	1011.34	66.33	434.76
28.45	69.23	1013.07	39.46	436.96
22.04	58.05	1013.11	85.22	447.28
13.18	40.03	1017.75	82.29	470.88
31.41	76.09	1007.68	70.49	430.81
11.3	25.36	1008.66	96.18	471.19
24.22	68.51	1013.23	74.96	440.01
16.21	41.23	995.88	80	463.09
14.55	41.7	1018.58	80.8	454.14
15.04	41.35	1004.29	99.1	467.96
22.21	61.5	1008.34	76.22	445.77
30.16	73.17	1010.74	58.99	434.43
13.34	41.79	1011.48	86.66	461.12
21.18	70.02	1010.27	96.46	442.51
8.54	38.08	1019.75	71.24	478.31
12.2	39.72	1018.07	54.83	471.33
13.47	44.88	1017.56	93.23	476.67
16.73	43.79	1016.25	73.58	468.87
17.99	50.16	1009.98	100.09	451.38
20.1	58.95	1018.46	80.87	446.7
20.82	52.84	1004.13	79.42	449.59
14.28	42.77	1020.06	81.77	466.75
15.31	40.66	1016.46	84.64	458.26
12.62	34.03	1019.06	74.78	471.55
16.1	36.71	1013.58	74.41	471.46
14.46	45.87	1009.21	84.09	464.5
13.96	40.92	1022.65	73.08	460.95
24.54	48.06	1013.02	55.18	443.67
31.27	73.77	1003.27	71.48	430.32
27.15	73.9	1007.57	74.42	433.09
31.21	66.44	1008.57	65.76	430.7
9.48	44.68	1023.29	92.9	478.66
21.16	65.48	1016.99	72.79	446.37
21.87	61.45	1011.13	92.22	445.21
15.35	35.4	1016.3	57.12	468.94
16.07	47.83	1006.99	86.49	458.18
31.2	73.17	1010.28	53.23	431.23
27.71	66.93	1016.85	58.77	447.06
6.98	40.35	1011.92	94.72	484.19
28.54	76.86	1000.09	74.67	433.35
10.22	45.01	1018.27	93.62	474.32
11.87	36.43	1023.42	79.5	474.17
23.21	74.22	1009.68	88.46	440.46
25.95	59.92	1010.05	76.05	443.93
11.21	40.75	1016.45	86.14	479.2
32.45	66.44	1011.21	50.18	429.99
19.09	65.94	1012.53	81.06	446.34
24.04	60.77	1017.62	75.23	442.25
25.1	74.87	1010.01	79.41	439.93
27.04	65.06	1013.33	52.37	439.84
14.4	42.18	1015.47	77.7	464.81
26.6	63.07	1011.97	61.3	442.25
5.25	42.85	1013.75	89.67	477.78
19.97	50.78	1008.75	92.7	446.57
22.23	46.93	1013.09	58.02	448.27
8.67	36.66	1026.8	84.36	480.38
22.08	55.5	1018.42	58.46	455.79
5.56	45.87	1006.99	96.48	476.61
11.02	38.28	1013.51	95.66	472.11
16.52	43.7	1015.08	58.36	466.73
27.54	74.22	1007.44	75.91	430.72
15.79	38.28	1014.4	74.84	465.64
31.45	68.27	1007.56	64.79	430.81
21.8	51.3	1012.07	89.51	450.25
23.25	72.99	1009.17	89.85	438.51
19.46	46.33	1013.77	89.62	452.11
26.86	70.47	1007.18	72.38	434.59
25.44	65.06	1013.82	55.72	440.09
28.35	70.32	1009.22	47.13	427.21
14.81	43.7	1015.1	60.72	469.5
6.07	38.91	1019.25	83.39	483.56
22.77	59.92	1009.67	94.09	437.9
16.31	68.28	1003.98	98.62	450.33
30.93	61.5	1009.81	41.46	437.35
29.31	64.84	1010.49	53.97	442.11
26.05	65.27	1013.69	56.46	440.75
25.69	62.26	1011.38	74.08	436.36
22.1	65.06	1014.56	71.5	442.18
11	40.23	1019.08	86.5	475.9
33.26	68.51	1012.49	52.68	429.38
11.91	40.69	1014.41	83.71	476.71
24.23	59.04	1011.91	71.79	443.06
24.35	73.17	1012.2	85.88	435.66
26.65	74.16	1008.27	94.54	431.47
28.24	65.74	1013.4	64.87	438.47
24.79	75.6	1017.07	68.23	440.05
24.43	60.07	1015.59	59.99	444.71
9.16	41.03	1021.3	76.08	484.96
2.64	39.64	1011.02	85.24	481.29
11.7	41.16	1019.58	87.49	464.12
15.93	52.75	1024.57	58.71	457.92
18.41	42.04	1011.69	64.88	465.64
18.07	44.92	1024.72	69.15	457.53
12.82	41.58	1020.37	81.06	464.07
8.25	43.14	1011.3	87.1	479.95
16.99	40.89	1011.54	64.51	464.95
27.46	69.98	1013.28	63.73	435.36
21.11	58.66	1011.7	68.71	457.89
14.66	40.73	1017.45	88.57	459.23
26.19	69.34	1009.48	87.59	433.99
20.89	67.71	1006.12	59.12	445.39
25.16	57.17	1009.86	75.7	442.03
31.15	67.45	1014.85	42.11	431.97
9.63	40.27	1009.96	81.03	477.38
14.15	39.28	1013.5	77.63	471.23
25.77	73.68	1014.18	87.53	429.84
24.46	68.61	1011.02	76.66	440.58
26.21	56.85	1011.45	41.37	439.55
30.55	66.25	1009.15	63.52	440.74
14.13	41.23	994.6	93.02	467.84
3.73	39.42	1024.4	82.42	488.58
24.79	59.21	1017.9	53.83	446.04
16.57	63.31	1016.19	81.02	454.78
26.86	68.08	1012.99	50.04	436.25
22.09	65.59	1015.54	72.44	447.28
29.12	66.51	1015.69	37.9	432.88
14.45	43.34	1015.47	83.33	462.16
11.58	41.74	1020.41	74.09	478.06
32.55	73.03	1014.36	44.83	439.81
31.79	76.2	1007.89	56.3	434.01
19.7	52.84	1004.86	89.72	444.64
11.22	41.66	1008.96	72.38	477.53
21.83	63.87	1018.93	63.07	452.21
29.6	71.94	1007.07	62.65	429.02
28.07	74.33	1012	71.69	428.87
10.12	38.38	1018.22	85.93	477.73
9.84	40.72	1022.21	77.79	477.52
15.41	44.78	1007.69	65.17	456.83
22.64	70.98	1005.71	95.65	441.99
13.53	42.86	1014	90.63	471.73
8.94	36.71	1025.5	80.45	477.62
23.72	58.62	1016.65	69.1	447.49
21.26	50.32	1008.41	87.22	446.22
10.23	42.32	1017.53	89.93	473.59
7.64	38.18	1017.65	78.51	484.45
14.92	41.16	1004.83	83.7	465.72
27.62	68.27	1008.04	63.04	427.67
10.56	40.22	1005.08	89.71	478.02
17.9	52.08	1006.41	100.09	451.94
29.41	64.05	1009.82	67.4	444.82
17.68	45.17	1017.5	77.57	461.96
23.56	49.16	1002.54	69.07	443.02
25.01	68.63	1013.76	43.65	447.12
29.95	67.25	1017.68	51.91	433.13
22.36	64.15	1021.05	68.43	453.94
17.36	41.23	998.08	63.46	459.1
10.05	40.71	1015.51	84.21	471.68
21.94	62.52	1015.99	74.56	449.87
20.15	39.72	1001.85	59.32	456.87
7.31	42.18	1014.75	86.75	477.38
21.7	64.44	1014.95	73.33	448.51
4.86	39.4	1012.73	91.39	488.63
15.52	41.93	1022.97	52.92	471.97
6.94	39.61	1017.74	81.43	480.07
19.11	44.85	1014.76	45.86	464.66
16.84	56.03	1020.25	70.37	437.14
11.63	40.55	1022.89	87.12	474.67
21.24	44.3	1014.34	83.39	444
15.47	46.48	1007.69	91.07	462.58
29.42	69.14	1007.32	75.04	437.75
14.33	42.86	1010.82	88.59	469.52
18.75	63.09	1018.19	87.84	450.98
12.5	43.67	1013.99	90.91	473.26
28.98	70.8	1008.19	73.45	434.08
4.41	42.07	1005.54	68.85	488.36
16.61	43.77	1012.25	77.23	457.66
5.28	42.07	1003.82	80.84	485.24
9.83	38.56	1017.35	62.8	480.47
14.28	37.2	1013.96	82.71	467.44
32.87	71.32	1004.36	54.69	433.15
26.82	66.51	1016.32	55.76	439.48
30.56	69.04	1009.29	55.73	442.24
18.24	59.15	1012	84.4	449.48
22.18	62.91	1012.14	68.86	449.77
8.44	41.17	1019.9	70.72	486.15
13.74	45.08	1024.97	84.79	466.79
11.02	41.26	1020.69	92.13	471.93
19.6	48.14	1013.18	68.71	456.57
26.03	69.68	1011.61	60.75	449.54
20.71	49.69	1010.26	69.97	455.69
21.67	61.45	1010.84	92.19	443.82
19.13	42.18	1001.45	98.77	456.04
27.79	69.23	1012.86	45.71	435.06
6.08	35.79	1011.08	90.59	483.08
29.56	71.14	1011.42	53.18	432.09
15.84	41.04	1025.64	63.43	456.21
30.93	69.98	1013.33	62.1	432.25
20.45	59.8	1015.13	79.21	452.96
11.1	40.92	1021.98	94.14	462.07
17.06	58.96	1013.83	73.95	461.15
26.47	63.13	1013.72	79.4	441.81
25.03	47.93	1003.02	62.89	443.55
8.85	41.06	1020.99	86.05	486.4
16.74	41.16	1006.87	74.24	463
6.8	41.16	1023.17	95.4	477.8
24.26	68.14	1005.09	59.49	438.79
17.98	60.1	1009.61	84.11	452.57
22.97	72.24	1011.15	95.85	437.41
17.99	43.72	1008.64	75.04	453.02
29.29	70.36	1006.64	60.82	431.26
15.28	43.71	1024.32	81.24	463.44
14.16	40.89	1010.78	82.86	471.15
25.06	52.36	1014.7	67.98	454.13
18.97	44.85	1014.86	46.31	466.17
29.04	70.72	1009.55	66.58	437.95
19.72	47.03	1012.1	90.36	458.59
15.63	44.9	1009.38	82.8	457.44
12.19	40.05	1014.65	85.1	472.68
16.3	41.16	1007.88	76.61	463.47
14.8	44.71	1014.67	41.71	470.77
24.63	59.57	1010.45	85.36	440.67
12.32	43.69	1016.26	83.18	471.6
5.53	40.64	1020.78	97.25	479.88
13.11	41.44	1015.55	74.45	471.61
25.12	77.95	1009.26	82.95	433.4
14.84	71.14	1019.61	66.78	454.16
25.24	67.45	1013.56	50.91	438.99
12.87	39.3	1019.26	71.55	471.48
19.25	43.43	1012.01	73.26	451.08
15.11	43.13	1014.99	46.91	466.74
29.23	77.3	1002.71	65.24	438.05
12.6	40.35	1011.89	80.88	475.42
7.91	38.56	1016.48	68.94	485.95
23.45	45.61	1012.84	73.42	454.92
32.1	69.98	1013.31	55.84	431.09
16.25	40.89	1011.09	62.7	464.33
23.27	68.28	1005.01	74.83	444.86
17.01	50.9	1013.23	82.03	460.14
8.76	41.82	1033.29	76.5	480.08
27.35	60.75	1008.98	67.56	435.14
10.51	37.5	1010.7	96.29	474.24
23.56	66.49	1012.21	53.86	441.92
29.24	60.23	1009.62	59.71	438.24
29.86	69.34	1007.76	54.12	433.57
29.1	76.2	1006.28	60.22	435.97
11.38	52.75	1026.19	72.71	469.9
29.53	64.44	1013.22	59.75	440.1
8.48	36.18	1013.31	75.15	480.63
24.91	69.89	1015.25	82.39	438.29
26.46	61.41	1012.41	56.58	448.83
16.61	25.88	1009.34	65.47	460.97
11.77	40.92	1021.85	81.55	467.31
19.1	56.53	1020.18	76.38	455.52
9.19	40.62	1017.78	68.91	475.42
13.53	42.03	1017.52	84.02	466.71
14.94	42.77	1018.9	73.95	462.67
29.05	70.32	1011.33	72.5	437.16
15.27	38.73	1002.83	77.77	465.99
25.96	60.95	1014.52	50.03	444.19
15.75	39.99	1007.02	77.44	464.95
23.69	77.54	1009.32	89.7	440.21
11.92	40.55	1016.91	100.07	472.45
28.54	72.99	1007.42	67.87	432
13.72	45.01	1014.07	77	464.59
6.1	40.07	1020.21	67.24	494.43
12.64	41.26	1020.79	83.66	465.78
17.14	58.16	1018.59	77.22	458.61
25.43	69.13	1002.2	86.44	431.53
12.78	41.04	1025.16	85.14	461.61
21.17	52.3	1009.67	88.88	444.5
31.19	70.94	1007.29	51.91	436.6
12.42	43.8	1023.13	79.8	466.59
29.62	70.02	1010.09	43.1	439.35
16.29	50.88	1013.79	99.15	456.28
12.33	39.28	1011.84	80.01	476.49
26.8	72.58	1009.22	89.03	431.18
13.63	43.22	1012.71	72.85	464.62
27.47	70.72	1009.97	74.62	443.25
24.47	57.85	1013.05	66.34	445.37
13.46	39.85	1012.76	72.94	472.5
11.78	39.96	1011.37	82.95	472.79
10.42	39.35	1015.21	89.75	478.52
4.49	40.27	1012.01	76.5	494.24
25.45	63.76	1009.96	67.78	439.56
21.29	47.45	1008.85	71.6	447.78
22.65	68.67	1006.67	77.42	447.01
11.06	41.5	1013.09	89.8	476.24
25.56	75.6	1017.37	69.31	442.2
24.51	51.95	1005.57	63.53	449.73
25.76	71.06	1007.93	90.4	433.75
17.85	48.14	1017.16	86.68	451.9
13.83	39.64	1012.52	69.97	472.95
31.38	72.29	1008.73	73.27	430.58
18.39	38.52	1019.66	66.93	453.89
17.79	45.01	1015.71	67.13	454.4
23.57	63.91	1011.65	80.74	441.93
12.03	40.75	1015.93	85.07	474.97
26.82	69.05	1004.62	40	437.42
21.76	60.27	1018.96	85.06	446.86
31.23	68.67	1005.82	52.1	436.58
9.98	41.01	1017.83	98.07	466.05
12.86	40.6	1013.6	84.85	472.04
31.49	73.5	1010.71	40.16	432.13
9.08	36.18	1020.24	68.37	477.26
24.72	77.54	1008.39	81.03	438.52
21.49	70.32	1009.07	92.25	443.04
25.2	63.76	1009.78	64.96	438.15
18.39	52.08	1006.53	100.09	449.96
30.58	65.18	1011.61	37.43	437.17
30.2	56.9	1006.89	42.69	436.17
23.59	47.43	1006.64	48.92	447.36
28.61	52.84	1006	45.73	437.39
14.82	42.74	1028.04	69.81	466.34
31.7	76.09	1007.06	72.39	441.36
7.69	36.24	1013.08	88.37	482.46
21.79	60.93	1006.44	87.68	443.01
10.11	41.62	1017.17	97.82	463.57
12.25	44.85	1014.13	85.25	470.92
21.04	65.46	1017.22	63.02	452.12
17.01	49.15	1021.83	84.02	458.78
18.03	58.86	1015.99	89.03	450.33
30.4	77.3	1002.44	59.42	438.43
28.28	56.9	1006.38	64.99	445.61
28.6	71.22	1003.15	58.33	443.01
11.08	38.16	1014.45	74.99	473.32
11.68	40.55	1017.31	99.82	473.51
23.54	65.27	1013.78	64.28	445.19
14.32	44.6	1013.85	68.13	466.36
27.31	59.54	1006.24	71.99	440.13
30.06	69.14	1007.5	72.48	436.89
18.74	44.34	1019.4	55.16	468.84
25.93	66.56	1004.97	76.35	433.25
27.71	54.2	1012.72	47.25	440.74
20.15	65.59	1014.62	79.39	449.84
26.69	59.21	1012.55	57.59	436.33
16.26	38.58	1016.04	76.7	462.54
29.05	75.6	1017.63	51.16	439.14
14.1	48.92	1011.6	84.39	461.34
19.7	54.42	1011.83	89.86	450.48
8.57	39.69	1000.91	99.9	474.29
10.41	41.01	1020.12	94.27	472.82
14.55	42.74	1028.41	70.09	465.81
31.49	69.13	1009.33	53.9	425.74
26.12	75.6	1017.41	72.31	439.68
7	39.81	1017.47	87.65	484.51
11.15	41.26	1022.67	81.83	473.57
14.27	44.34	1018.95	71.44	470.98
15.34	43.5	1021.18	79.44	459.77
25.16	60.23	1011.21	68.31	444.98
11.92	40.62	1015.91	55.4	464.9
22.3	67.25	1017.33	75.85	453.27
29.42	71.32	1002.26	67.13	437.47
12.42	41.58	1019.49	86.31	466.05
31.42	69.13	1009.34	57.16	425.98
21.9	63.13	1011.54	81.83	447.4
29.83	68.67	1005.33	71.15	434.28
4.32	35.47	1017.8	88.51	488.03
24.22	56.89	1013.81	70.02	440.79
27.04	48.41	1008.57	60.73	441.21
23.75	66.54	1004.41	85.44	436.57
7.67	42.85	1012.02	93.35	478.94
9.7	37.14	1012.79	75.2	475.77
16.16	25.88	1009.58	72.24	461.86
7.48	38.5	1014.01	77.35	488.43
5.15	40.07	1012.27	63.31	495.35
18.81	52.08	1005.77	98.86	450.72
27.88	75.23	1011.33	58.91	439.33
13.14	40.66	1016.47	94.76	466.95
30.51	59.57	1011.08	61.94	436.92
8.73	41.92	1029.41	89.72	480.99
13.83	41.49	1020.11	87.29	469.57
15.14	41.93	1020.95	61.26	469.68
28.69	71.29	1009.22	68.35	433.07
12.68	41.16	1020.09	83.32	464.93
9.64	40.56	1022.51	78.62	483.39
28.69	73.18	1012.23	68.57	431.36
12.75	42.86	1014.9	88.44	475.09
25.23	66.44	1011.37	51.3	438.28
10.17	40.1	1014.05	91.9	479.58
10.94	25.36	1009.47	100.1	470.9
24.67	49.5	1013.62	59.42	455.31
20.77	52.05	1012.22	45.61	455.02
23.43	60.32	1015.34	69.34	446.88
10.09	41.62	1015.21	96.56	463.86
23.69	63.77	1013.39	79.5	444.07
26.65	74.67	1015.73	77.32	435.9
13.56	49.83	1007.01	89.86	466.33
21.22	43.43	1010.96	61.07	448.06
19.94	65.46	1017.7	68.94	448.67
22.21	61.87	1010.9	54.22	446.62
17.53	50.66	1012.74	91.51	457.28
7.17	39.4	1011.48	90.38	484.33
27.77	62.26	1010.88	66.45	430.19
29.29	73.18	1012.4	66.65	430.31
14.16	44.06	1018.92	76.34	464.91
8.55	35.77	1016.15	73.32	481.44
14.12	39.4	1008.02	76.45	468.63
5.47	38.68	1017.33	72.71	485.7
18.8	47.83	1005.86	76.77	453.9
19.69	59.14	1015.99	70.33	448.69
21.11	41.67	1012.44	52.86	460.33
3.92	41.31	999.22	95.26	487.35
11.67	42.74	1025.92	79.57	474.75
14.05	41.39	1019.06	68.54	472.19
11.28	40.55	1006.23	97.78	475.14
11.48	37.92	1008.47	70.55	472.9
17.47	43.77	1012.25	76.78	456.41
25.64	70.72	1010.16	84	441.68
20.6	65.12	1015.53	71.57	452.86
21.37	57.76	1018.8	70.12	454.66
20.51	45.38	1014.29	69.14	461.87
27.28	51.43	1011.46	51.38	450.53
29.91	70.02	1010.18	64.1	437.63
17.65	62.1	1019.63	84.3	452.2
25.77	71.37	1008.88	78.96	433.45
9.54	41.17	1019.79	65.61	481.18
20.36	57.5	1014.36	82.96	452.28
26.89	56.85	1012.27	43.84	436.44
13.35	39.18	1023.24	61.98	469.34
23.91	67.69	1008.28	66.71	439.84
28.29	61.86	1011.87	64.17	438.25
14.27	41.48	1014.83	62.7	458.19
27.48	61.41	1012.2	45.06	452.24
34.03	73.56	1006.49	51.07	440.29
10.01	40.78	1023.71	88.11	470.82
14.09	41.66	1009.25	71.4	469.93
25.18	57.5	1015.07	60.76	449.01
8.63	39.96	1024.39	99.47	475.79
22.2	59.21	1017.87	73.34	445.29
20.58	39.53	1005.68	62.09	460.1
17.37	40.55	1001.19	71.42	460.97
29.97	73.06	1009.41	78.26	430.37
28.53	49.3	1003.83	59.69	438.17
14.5	39	1017.04	75.75	465.32
3.91	35.47	1016.92	86.03	488.67
17.51	39.54	1010.22	71.53	462.12
13.57	42.99	1007.51	88.95	472.04
7.55	38.08	1019.37	76.32	485.49
14.22	45.08	1023.26	84.41	466.47
15.51	36.71	1014.05	72.92	465.85
13.36	39.64	1010.3	93.26	471.89
7.73	37.8	1020.71	63.93	483.94
4.77	39.33	1011.32	68.98	494.91
27.37	76.09	1007.52	89.12	433.34
25.02	69.75	1010.04	91.86	437.87
6.14	40.62	1015.71	86.51	481.66
14.08	43.41	1015.59	54.15	466.99
17.37	58.49	1012.2	91.14	456.29
26.18	69.14	1006.54	85.95	436
21.35	58.16	1017.21	67.66	452.83
24.17	48.78	1018.08	75.14	440.96
16.61	50.9	1013.18	85.26	460.35
15.29	41.35	1006.32	82.56	466.27
20.27	63.09	1016.6	90.7	446.75
11.33	41.16	1019.05	87.13	468.87
27.24	69.13	1009.28	70.85	432.36
20.11	42.04	1010.79	60.31	464.13
22.5	59.54	1007.99	93.63	445.22
22.02	64.45	1012.57	47.87	454.9
21.14	69.94	1008.87	79.74	440.69
10.9	41.93	1014.96	96.24	477.93
20.08	49.69	1008.34	69.88	453.54
29.71	73.18	1012.35	63.06	427.04
10.94	40.81	1026.03	80.79	476.32
23.93	68.28	1005.16	69.91	444.95
15.69	37.87	1021.18	84.38	465.41
10.48	40	1021.35	88.52	478.86
27.78	72.43	1006.72	74.53	429.62
16.17	41.79	1005.78	78.8	454.72
32.39	79.74	1006.92	58.58	430.12
24.3	69.23	1013.17	59.91	440.56
29.56	74.22	1007.45	57.46	432.84
30.01	73.18	1012.23	60.9	429.84
16.44	44	1024.48	76.51	460.33
10.86	37.5	1013.36	75.56	473.75
28.18	73.88	1005.89	75.41	434.48
18.58	64.45	1009.68	67.57	444.28
28.69	67.79	1011.01	66.4	439.87
12.35	41.38	1021.99	55.38	474.94
32.26	71.29	1008.41	48.58	431.96
25.13	51.95	1005.42	62.05	447.7
19.22	62.1	1019.43	79.19	451.8
32.84	74.67	1015.89	31.81	430.88
24.66	57.43	1013.17	71.82	445.41
29.08	67.07	1005.73	57.18	435.57
24.92	60.95	1014.88	60.58	445.44
22.73	66.75	1018.13	84.06	437.93
32.16	68.14	1004.86	37.77	429.64
24.33	49.16	1003.46	61.04	441.2
10.95	40.22	1010.04	78.96	477.23
19.93	62.1	1019.94	76.41	450.57
26.62	71.73	1009.32	80.1	431.93
6.69	43.65	1020.14	69.55	482.57
29.18	71.43	1011.65	59.49	443.75
25.95	59.27	1010.9	70.42	444.19
6.91	39.37	1019.58	71.02	488.2
19.97	59.14	1016.05	70.58	450.06
14.81	39.58	1011.62	73.64	467.32
24.63	65.38	1010.43	40.68	446.23
19.68	62.96	1020.41	82.26	453.58
27.89	73.21	1001.32	85.88	431.59
12.82	43.5	1022.38	84.32	471.41
27.2	77.95	1009.48	78.53	433.39
23.55	65.12	1016.23	66.65	446.44
6.52	35.57	1025.37	78.32	486.06
24.01	63.56	1014.19	64.31	444.1
22.07	60.08	1017.68	71.23	452.56
14.01	42.99	1007.12	69.69	469.23
14.5	41.76	1023.94	84.42	464.23
10.09	37.14	1012.99	72.59	473.66
26.72	65.61	1014.41	52.01	442.48
29.44	64.33	1011.4	61.78	442.32
24.8	50.23	1016.62	63.13	453.56
29.45	68.27	1007.96	61.63	432.96
24.37	68.14	1005.22	59.27	440.22
14.87	42.77	1017.94	75.06	462.03
26.98	70.94	1007.99	68.16	434.73
26.02	59.57	1011.16	76.93	446.5
21.4	44.57	1005.7	73.09	445.09
14.02	41.78	1011.26	48.62	465.87
18.28	60.1	1009.72	85.79	452.93
19.64	44.6	1015.88	47.56	467.53
18.77	39.54	1009.39	63.35	458.58
19.24	58.33	1013.65	85.47	449.26
25.03	60.84	1017.69	59.23	441.58
18.92	46.93	1009.89	77.98	453.66
9.81	44.45	1021.19	90.55	471.32
4.97	42.85	1014.02	88.78	482.98
22.51	66.49	1014.59	63.03	453.08
21.75	49.82	1015.01	78.33	455.28
26.61	72.43	1007.71	75.82	427.61
12.12	40	1018.72	84.42	462.1
12.48	39.85	1012.93	60.23	477.17
20.01	56.65	1020.77	74.46	457.01
21.18	45.01	1012.57	48.05	451.62
9.68	38.16	1015.54	79.67	475.51
22.8	49.16	1006.4	77.05	439.65
11.62	41.54	1019.94	66.43	477.75
21.81	65.46	1013.97	52.16	444.66
8.16	39.3	1019.39	85.38	483.17
24.78	66.49	1010.55	68.12	436.62
6.25	40.02	1032.14	80.22	481.38
22.03	64.69	1007.21	75.75	440.92
13.08	44.9	1020.47	86.46	472.01
7.79	41.01	1024	97.2	477
14.77	39.16	1016.12	81.88	470.39
23.28	72.24	1011.3	90.5	434.21
18.59	44.63	1003.99	86.22	459.65
20.46	51.43	1007.31	93.25	444.88
24.2	59.43	1009.69	62.3	440.66
18.41	44.9	1008.97	73.81	453.12
18.77	58.66	1010.34	87.25	454.54
16.89	49.21	1015.19	70.39	458.25
14.95	39.31	1009.15	75.3	462.72
31.97	69.04	1008.5	47.69	441.18
5.85	40.77	1022.44	84.77	480.59
20.37	69.48	1011.04	84.31	445.81
5.52	39.33	1009.74	95.25	492.39
22.32	59.8	1016.82	64.18	451.21
22.87	71.29	1008.1	73.1	442.27
29.19	65.71	1013.85	50.5	444.49
6.91	37.49	1011.05	82.07	481.88
24.42	65.94	1011.25	65.04	439.63
24.35	58.49	1011.03	70.64	445.6
19.83	39.39	1013.73	59.16	463.72
22.25	60.84	1018.07	73.67	443.99
13.93	42.86	1032.37	71.11	468.88
9.11	40.64	1020.68	86.91	476.62
31.18	77.95	1014.89	65.62	431.58
9.53	38.38	1020.49	80.08	478.03
7.94	35.77	1017.04	63.22	480.38
5.41	45.87	1008.47	97.51	479.48
13.83	44.45	1021.5	68.75	462.6
13.9	40.2	1013.13	89.91	464.17
22.64	59.27	1012.58	83.55	446.2
18.72	60.07	1015.81	70.55	454.35
28.88	73.68	1015.25	47.73	432.93
11.42	40.43	1025.5	75.85	490.02
6.02	41.38	1021.2	88.71	490.57
10.86	44.85	1014.15	88.36	476.87
13.89	43.7	1015.12	64.99	470.88
19.38	54.9	1017.08	70.46	454.1
8.74	36.3	1015.18	61.97	438.63
16.01	49.64	1026.35	77.75	457.8
20.68	68.61	1011.2	84.81	446.33
15.3	41.76	1022.57	71.56	466.59
13.93	44.9	1022.15	85.93	470.59
14.91	46.9	1019.59	98.1	461.73
7.24	41.17	1020.35	80.56	486.76
15.75	36.99	1007.67	93.8	464.38
10.12	43.72	1011.33	97.62	473.05
20.85	59.21	1012.9	75.97	444.44
23.29	62.91	1013.35	68.25	444.61
14.59	35.71	1015.19	54.13	469.32
29.96	67.83	1008	44.05	433.13
25.62	58.82	1010.02	70.31	444.14
28.62	79.74	1008.12	65.39	436.12
23.72	66.48	1003.61	73.75	436.62
20.89	70.32	1011.22	89.68	442.5
11.82	41.17	1019.5	55.74	475.61
3	39.64	1011	80.14	485.2
29.7	67.17	1007.31	66.56	438.04
21.35	57.76	1017.36	73.1	452.57
27.2	78.05	1010.15	90.2	430.55
22.75	70.94	1008.03	81.95	439.91
10.56	41.54	1019.92	78.95	479.33
22.43	63.94	1012.76	93.24	444.53
10.1	41.4	1024.29	85.94	474.28
26.85	66.86	1006.78	69.4	438.26
14.02	40.1	1015.56	82.44	467.32
21.69	47.45	1007.56	77.2	447.06
8.86	40.23	1017.57	90.47	478.05
33.12	68.31	1010.3	42.29	441.13
12.1	44.77	1019.1	75.85	463.11
5.74	45.87	1011.44	95.94	482
9.55	41.44	1015.07	85.94	481.75
5.89	39.48	1005.11	59.83	484.91
17.9	67.71	1004.3	89.59	449.73
20.58	49.15	1021.42	56.15	453.87
26.38	69.88	1008.42	86.25	432.25
27.62	71.14	1011.6	52.8	434.72
28.99	54.2	1012.79	41.9	442.6
17.72	50.9	1012.02	85.55	456.4
28.36	60.23	1010.05	53.03	441.08
22.98	69.84	1005.55	84.1	437.49
23.25	71.29	1008.05	71.36	442.21
28.15	71.25	1000.51	81.04	431.28
10.81	44.63	1020.61	88.29	473.86
22.68	50.78	1008.83	70.3	447.69
9.2	40.03	1017.05	92.46	480.38
20.52	57.76	1017.03	81.19	453.64
27.92	68.3	1015.02	51.04	437.28
25.16	47.01	1014.99	64	452.64
25.52	67.17	1007.33	85.12	440.02
12.09	38.25	1013.61	81.28	469.29
30.56	71.98	1004.74	58.77	429.2
23.76	61.5	1009.15	68.52	441.16
18.75	44.9	1007.99	75.76	452.77
12.84	40.8	1026.95	69.86	475.59
20.01	68.63	1012.34	69.49	454.5
9.66	41.82	1033.19	73.19	477.67
26.93	75.23	1010.19	62.12	434.1
13.79	45.08	1025.02	84.36	469.55
22.82	69.94	1004.65	73.47	437.32
20.69	50.78	1008.71	91.95	447.58
21.89	74.78	1010.35	80.39	444.6
26.45	69.13	1001.53	89.64	427.5
28.18	77.54	1011.99	74.72	430.55
9.07	40.67	1014.41	70.39	484.5
25.38	70.94	1007.87	73.59	446.31
11.2	41.38	1021.65	61.89	476.87
14.45	52.75	1023.97	63.59	459.85
28.84	60.23	1009.7	59	437.82
18.13	49.39	1021.29	82.52	458.53
20.87	57.19	1006.5	77	445.95
16.32	43.14	1014.72	70.43	465.38
25.35	72.99	1007.65	84.09	436.29
30.61	68.84	1011.18	52.5	439.9
29.76	73.56	1008.07	84.85	432.51
16.64	43.14	1019.03	82.88	459
16.77	42.28	1007.53	73.19	465.52
27.2	65.18	1011.47	47.14	436.99
17.32	41.67	1013.23	68.07	462.74
25.79	65.27	1013.26	55.35	440.04
19.08	58.59	1013.42	68.88	451.05
4.84	38.5	1011.96	81.62	491.23
26.08	48.6	1003.61	57.8	438.61
17.46	62.1	1019.96	83.99	451.06
16.41	47.24	1015.75	88.78	457.94
10.39	40.22	1004.95	91.65	476.49
13.13	40.75	1016.05	80.87	472.5
13.67	41.48	1017.51	63.54	463.97
7.09	43.13	1017.91	92.37	485.04
10.52	41.48	1018	68.99	469.8
21.26	60.84	1018.43	78.83	446.08
5.79	45.87	1010.23	95.41	480.97
8.42	40.64	1022.35	96.38	476.29
24.78	68.63	1013.96	43.7	448.43
23.58	70.04	1010.95	76.32	435.47
28.08	73.42	1012.17	62.74	434
4.95	42.07	1004.87	80.88	485.67
24.19	46.93	1013.4	49.39	446.3
9.88	40	1021.4	92.06	481.58
29.29	72.58	1007.39	72.85	428.73
4.04	35.47	1017.51	87.35	486.86
7.38	41.22	1016.47	96.29	485.73
10.58	42.34	1022.32	94.01	474.91
27.02	72.58	1009.21	89.13	437.8
6.4	39.9	1007.75	86.55	486.03
10.46	41.06	1021.41	82.34	481.47
30.61	67.69	1004.97	47.46	429.8
29.83	71.98	1004.32	67.55	426.98
31.77	76.09	1007.4	73.36	431.69
8.35	40.46	1019.23	73.26	474.79
31.75	74.99	1003.25	53.33	430.82
5	40.64	1021.05	94.84	485.27
25.26	74.33	1014.79	79.56	433.49
6.1	39.33	1010.4	95.34	491.37
7.24	41.17	1020.35	80.56	486.76
10.52	42.18	1014.9	95.67	469.03
15.66	41.35	1001.68	86.26	463.57
10.41	36.71	1022.02	84.56	474.2
21.08	44.05	1008.13	72.52	449.6
23.59	58.62	1017.81	66.68	448.09
21.53	58.05	1012.9	87.57	447.93
10.67	40.56	1022.39	77.92	482.36
14.31	40.78	1024.3	76.41	463.54
28.74	70.32	1008.15	45.99	431.93
29.15	69.48	1008.68	55.78	430.54
18.85	44.63	1009.06	84.75	456.72
6.93	41.14	1027.18	84.67	479.06
24.27	70.47	1008.96	78.31	434.24
13.35	41.16	1011.32	89.12	474.57
10.8	39.28	1010.7	82.62	478.8
22	51.3	1012.87	85.79	450.18
7.67	41.66	1016.25	77	485.03
4.62	38.44	1016.09	73.14	486.84
12.59	39.72	1017.76	61.14	470.18
23.49	49.3	1003.35	77.96	442.76
19.83	51.43	1007.36	91.64	449.45
29.26	69.34	1009.76	58.64	435.32
9.78	40.03	1017.33	92.11	480.59
16	43.02	1012.37	39.2	466.01
18.76	56.53	1020.04	86.62	452.5
19.82	63.9	1013.19	78.96	449.61
21.7	49.02	1008.74	82.8	446.46
27.28	72.58	1009.21	89.96	431.27
22.56	70.98	1005.66	95.95	440.81
30.72	71.58	1009.98	50.39	430.46
21.87	49.39	1019.99	67.05	451.97
8.85	40.22	1008.61	90.6	482.3
11.58	39.69	1005.17	86.55	469.6
25.66	61.08	1013	71.21	446.05
14.16	44.58	1020.75	77.42	473.22
7.92	39.54	1011.51	84.41	481.44
24.42	57.32	1011.46	55.92	443.94
30.18	61.5	1009.8	36.81	436.92
21.85	58.33	1013.03	66.39	447.31
30.56	72.39	999.96	69.81	430.85
7.78	40.8	1026.7	85.61	488.54
13.21	45.87	1008.58	85.66	463.1
20.25	58.33	1013.25	68.92	448.93
14.39	42.77	1017.36	83.28	463.65
21.92	49.02	1009.29	88.56	443.31
30.67	71.29	1008.36	52.08	430.28
23.6	57.17	1009.84	74.27	446.05
10.62	42.02	999.83	96.66	472.41
9.79	39.69	1002.36	93.86	471.61
13.69	34.03	1018.45	65.76	469.12
24.11	66.51	1015.35	56.01	437.21
20.68	42.04	1010.2	63.43	464.14
26.3	51.43	1012.05	63.62	442.28
25.7	69.45	1013.86	56.91	437.04
19.46	42.04	1011.3	60.45	466.24
11.49	41.54	1020.17	70.91	476.74
33.17	70.4	1004.45	58	430.14
13.46	41.4	1019.46	71.73	467.4
27.34	70.98	1008.82	71.42	438.73
24.2	64.33	1011.15	84.23	442.78
20.96	69.48	1011.04	82.63	444.31
28.82	71.8	1010.97	67.64	436.71
9.27	36.3	1026.93	72.13	479.66
11.48	36.18	1017.03	61.62	469.44
14	40.8	1026.17	54.82	474.87
13.03	41.26	1022.17	79.79	466.02
28.18	71.85	1008.78	82.88	427.83
12.77	40.71	1014.66	72.81	471.59
28.15	71.94	1006.73	68.21	427.69
22.65	60.93	1006.43	85.13	440.52
25.64	50.05	1006.97	67.72	440.86
21.94	57.5	1014.64	78.52	451.1
22.95	67.79	1009.89	91.69	442.19
5.21	41.31	1003.51	91.23	486.46
17.02	44.85	1014.38	62.66	459.98
33.18	72.29	1009.51	58.35	435.26
29.85	61.85	1005.45	61.85	436.46
26.56	65.59	1012.6	64.25	443.66
21.42	43.79	1015.76	43.08	462.19
23.86	63.77	1014.6	82.37	440.58
14.34	42.86	1031.75	66.81	466.17
30.36	69.82	1010.02	54.22	439.05
18.12	43.69	1016.91	52.95	464.68
28.53	68.08	1013.27	42.53	438.91
23.62	61.87	1010.07	48.77	447.93
22.81	58.96	1013.5	55.66	452.89
26.36	73.68	1013.99	86.44	430.39
29.3	73.67	1005.64	65.31	431.07
24.26	69.51	1013.43	53.23	442.56
26.85	71.73	1010.06	65.24	429.97
26.91	71.64	1004.59	83.54	438.73
24.47	70.94	1008.07	81.55	436.29
18.06	65.48	1018.79	77.95	454.34
26.05	44.89	1009.83	56.36	443.18
30.01	62.34	1005.28	62.34	435.94
23.08	64.44	1014.85	69.95	448.61
9.86	42.49	1009.16	81.41	477.78
11.44	41.39	1019.59	79.95	478.52
12.9	43.41	1015.92	59.15	464.26
13.44	42.34	1018	96.65	459.6
33.37	79.05	1007.19	62.64	430.42
28.82	65.71	1014.24	54.3	449.18
23.62	49.21	1014.1	49.54	443.53
18.65	52.08	1005.48	99.94	449.55
6.81	38.56	1016.5	70.99	487.45
19.04	43.43	1009.25	68.74	453.32
19.32	52.9	1016.86	68.2	457.66
6.64	35.19	1019.83	76.01	484.03
21.71	65.27	1013.24	63.58	444.91
16.46	48.6	1006.08	89	449.58
7.5	38.06	1021.96	83.45	485.98
24.27	74.93	1012.73	73.81	443.06
16	43.34	1013.58	78.87	461.7
17.28	65.94	1013.62	89.97	454.76
27.18	71.06	1008.16	86.32	430.66
14.18	42.99	1007.19	73.21	468.35
28.5	76.86	999.49	77.47	430.62
32.5	73.68	1014.65	55.72	427.63
21.89	58.62	1016.15	74.59	450.05
23.18	59.04	1011.44	79.28	443.12
24.07	73.46	1006.61	73.46	438.41
25.31	65.59	1011.16	79.71	440.96
25.15	68.51	1013.25	72.31	440.96
9.45	41.92	1029.32	91.09	467.79
27.01	67.98	1006.01	67.98	434.65
20.01	59.87	1019	84.12	448.39
18.36	51.43	1010.57	90.17	459.8
28.12	58.33	1013.61	39.67	448.72
18.18	61.87	1008.64	66.28	453.1
23.72	58.62	1016.32	71.17	447.13
27.17	61.25	1013.03	70.43	435.9
6.03	40.78	1025.53	98.68	480.36
22.58	58.12	1014.88	80.59	448.32
23.75	61.5	1008.16	69.14	442.35
26.33	64.45	1013.12	43.31	450.67
18.21	39.54	1009.81	70.92	461.73
22.06	43.43	1010.46	58.01	448.92
17.39	42.44	1013.72	73.79	461.55
9.3	40.56	1022.64	76.14	479.87
34.24	74.67	1016.24	25.56	425.58
7.17	41.92	1031.97	83.86	485.08
22.99	68.67	1006.65	77.62	446.67
22.02	69.45	1013.84	75.75	440.26
23.94	59.39	1014.32	74.55	438.64
22.28	58.86	1014.08	66.47	446.55
12.5	45.51	1015.8	82.82	469.69
18.19	44.06	1017.24	78.73	456.13
18.2	39.63	1005.35	79.05	468.49
13.06	44.2	1018.95	85.68	469.02
9.68	39.61	1015.63	74.5	475.02
29.25	69.13	1010.27	67.35	426.29
14.76	40.71	1017.37	71.07	465.58
10.94	39.69	1004.5	86.29	459.69
18.41	62.1	1020.4	78.1	457.14
30.04	67.25	1017.57	38.14	434.83
7.9	43.79	1016.14	83.05	485.26
22.05	59.92	1009.06	93.74	437.9
29.19	70.32	1008.28	55.42	427.9
24.16	60.29	1018.09	63.49	446.17
29.75	70.32	1007.35	55.8	427.2
22.73	63.73	1009.12	94.8	441.75
12.95	40.1	1015.31	86.01	471.07
10.54	41.93	1016.64	93.52	479.65
11.95	42.07	1018.52	84.73	467.91
16.81	45.87	1008.7	98	455.96
18.89	63.09	1018.47	84.85	450
11.89	40.64	1021.29	97.16	476.99
13.91	40.24	1017.03	85.93	466.24
28.59	75.08	1005.58	60.3	442.7
22.25	66.54	1004.64	89.15	437.19
24.04	51.95	1006.13	73.92	450.07
25.86	61.08	1013.51	67.5	449.67
27.91	72.24	1010.74	70.8	430.73
24.23	56.89	1012.32	68.04	441.29
8.69	40.81	1026.19	86.25	484.55
29.78	73.42	1011.27	52.79	445.58
13.52	41.44	1015.81	65.97	472.11
16.14	44.21	1020.36	80.59	461.03
25.87	63.47	1011.54	65.45	445.87
16.71	46.18	1011.61	95.82	459.4
18.84	67.32	1012.63	81.89	449.21
25.98	73.18	1012.28	85.78	439.73
14.93	39.39	1014.31	80.68	468.88
25.89	74.22	1007.43	81.55	433.73
8.82	43.56	1014.95	81.54	482.71
29.93	71.85	1008.43	66.64	426.82
16.51	51.86	1022.37	81.18	442.48
20.92	70.02	1011.06	85.63	437.96
22.98	73.17	1011.94	90.13	438.5
30.2	71.8	1011.13	60.66	436.94
25.03	59.21	1017.28	56.96	446.33
30.02	68.24	1009.8	65.73	429.5
18.87	43.43	1009.16	69.5	454.58
22.4	70.94	1008.06	84.52	440.04
5.07	40.07	1019.32	66.17	494.87
12.85	41.14	1027.04	86.29	464.86
26.74	59.87	1012.5	62.88	447.88
17.44	45.01	1013.65	75.13	456.08
27.56	63.9	1013.23	45.97	442.43
14.08	40.1	1015.48	82.81	469.33
12.83	44.88	1017.86	87.88	474.26
15.93	40.89	1011.57	74.55	468.8
30.05	69.34	1008.26	61.5	436.82
27.69	69.71	1009.9	69.91	440.43
14.91	43.34	1015.15	81.56	461.27
11.92	40.62	1016.66	55.25	468.14
30.85	70.94	1007.47	54.79	431.77
25.57	44.05	1005.79	65.14	443.84
10.55	41.55	1005.02	63.24	473.99
12.88	40.64	1020.76	92.58	474.58
13.03	39.52	1016.68	83.09	473.99
15.62	58.59	1013.91	97.6	457.3
14.4	40.2	1013.04	90.5	464.5
9.86	37.83	1005.05	100.15	472.46
23.84	63.47	1012.54	76.33	444.48
22.53	58.62	1016.28	72.78	449.02
7.18	38.56	1016.49	70.37	487.63
13.68	44.47	1027.81	69.53	469.37
25.41	65.12	1016.01	53.39	442.86
25.24	68.28	1000.26	78.17	435.9
28.01	44.89	1008.98	48.52	444.76
26.87	69.23	1012.71	54.54	433.89
14.01	39	1016.73	79.23	466.7
16.23	43.52	1020.13	76.3	464.74
7.06	41.38	1021.94	83.55	487.71
11.72	41.54	1020.04	66.84	476.12
14.14	43.34	1017.1	81.77	464.36
12.45	40.1	1015.4	82.61	473.63
27.72	69.88	1007.58	72.25	434.02
3.2	41.31	997.67	98.84	489.86
12.12	38.28	1013.65	90.19	471.19
19.95	57.25	1011.08	88.04	453.03
9.33	42.49	1008.93	82.59	478.43
14.87	54.3	1017.17	71.57	462.87
25.45	57.32	1011.7	47.09	441.3
16.23	43.69	1016.4	68.9	466.22
20.09	61.27	1020.05	70.71	451.43
16.66	36.71	1013.68	70.66	466.07
12.26	43.48	1016.41	72.95	467.83
23.32	69.23	1011.75	75.59	436.18
24.88	49.16	1006.04	64.54	445.18
15.38	43.99	1022.42	83.41	462.48
18.16	39.99	1007.73	70.54	463.69
27.26	66.56	1007.83	60.95	434.88
7.41	40.71	1023.07	83.32	474.25
2.34	39.42	1028.47	69.68	490.34
13.96	40.83	1009.89	84.86	469.86
29.91	74.9	1003.36	69.34	434.93
10.02	39.66	1016.34	79.98	480.05
27.71	75.23	1010.21	59.75	440.7
12.54	40.1	1015.73	84.29	475.02
17.66	44.9	1020.5	71.33	457.11
11.6	40.69	1015.51	86.55	474.99
28.42	75.23	1010.25	56.8	435.64
16.22	50.88	1014.33	100.09	454.94
18.21	41.85	1014.67	56.86	468.4
12.78	44.6	1013.64	77.56	468.67
29.82	43.21	1011.52	63.54	433.31
25.58	64.45	1011.07	61.47	447.16
30.22	68.3	1014.91	34.9	434.3
20.06	62.1	1020.21	72.21	451.81
29.07	71.64	1006.07	69.53	440.51
31.46	71.29	1008.57	41.79	430.8
20.98	60.1	1011.07	79.44	450.95
27.44	66.56	1005.51	69.28	428
26.99	62.26	1011.13	71.27	436.89
29.1	73.9	1007.47	59.48	436.56
6.92	41.26	1011.16	96.2	483.61
14.26	44.2	1019.81	76.46	462.87
26.44	54.2	1012.65	48.02	444.78
15.85	49.69	1015.48	88.65	464.72
15.55	42.03	1017.41	74.58	460.84
19.18	50.12	1005.99	100.09	444.56
11.87	41.78	1012.97	64.79	470.84
10.53	40.64	1020.62	98.43	477.99
14.54	43.14	1010.26	82.98	465.45
14.77	44.47	1028.38	71.18	464.25
21.79	61.45	1011.11	91.78	446.99
10.62	39.96	1025.37	96.64	470.8
14.72	38.91	1015.17	61.75	468.87
26.38	66.49	1013.89	43.06	442.38
8.85	40.43	1025.68	80.42	491.81
29.45	75.6	1018.12	50.68	437.31
30.39	71.8	1010.87	64.11	435.82
21.99	57.5	1015.87	80.72	446.96
16.48	68.28	1004.27	99.89	449.7
19.32	52.84	1004.29	83.51	450.88
29.49	69.71	1009.34	56.35	440.99
22.86	66.48	1003.77	71.22	435.56
30.29	71.58	1010.01	54.03	434.27
22.21	60.77	1018.21	84.96	444.57
26.48	73.06	1008.07	90.73	433.31
23.7	62.91	1012.26	57.89	444.99
24.34	73.5	1011.31	84.15	440.29
3.6	35.19	1018.73	99.1	488.98
13.47	43.34	1012.75	87.04	468.8
37.11	68.94	1006.23	31.15	429.25
33.43	69.88	1006.86	44.84	435.59
11.11	40.55	1023.91	87.12	476.37
11.87	44.6	1018.81	84.68	468.47
27.6	69.05	1003.87	42.01	436.08
13.74	39.35	1014.82	77.48	471.11
[truncated: 7,569 more rows]
