# Supplementary material
Source: ML conference proceedings conference paper supplement (https://proceedings.mlr.press/v108/ishibashi20a.html)
Supplement: Supplementary file 2 [file ishibashi20a-supp.zip › 137_supp/program/dataset/protein/CASP.txt]

17.284 13558.3 4305.35 0.31754 162.173 1872790.507 215.359 4287.87 102 27.0302
6.021 6191.96 1623.16 0.26213 53.3894 803446.6966 87.2024 3328.91 39 38.5468
9.275 7725.98 1726.28 0.22343 67.2887 1075647.5703 81.7913 2981.04 29 38.8119
15.851 8424.58 2368.25 0.28111 67.8325 1210471.6295 109.439 3248.22 70 39.0651
7.962 7460.84 1736.94 0.2328 52.4123 1021019.6667 94.5234 2814.42 41 39.9147
1.7 5117.3 1120.99 0.21905 51.6732 672722.6969 79.5911 3234.21 15 41.2382
9.314 5924.16 1625.27 0.27434 70.2103 828514.514 76.8064 2821.4 70 39.4964
1.985 6882.15 1791.22 0.26027 77.2501 916516.5154 96.6785 3490.88 74 37.4203
1.915 12090 4190.74 0.34662 129.002 1687508.0466 186.309 4262.78 39 30.3916
1.495 7400.24 1881.95 0.2543 82.932 1023845.5575 104.697 3852.4 26 35.414
12.118 6556.77 1612.77 0.24597 71.6315 891544.3167 93.5329 3161.33 76 38.0433
0.884 8828.21 2658.63 0.30115 90.8578 1233384.3226 123.686 3194.3 22 37.2413
7.913 5637.37 2665.83 0.47288 49.8566 771635.4595 95.7431 2177.61 7 41.5268
14.103 9021.1 3097.91 0.3434 98.1155 1244159.792 121.348 3396.4 32 37.0667
6.581 17572.2 5226.42 0.29742 227.769 2434431.0858 296.8 4876 122 26.8169
6.11 12330.6 4380.2 0.35523 195.93 1710154.8772 232.154 4321.41 164 30.4491
1.339 8478.55 2206.94 0.26029 91.5054 1199770.2004 128.166 3996.13 164 33.5263
2.554 9147.09 2828.26 0.30919 104.05 1291446.5265 131.358 3595.69 17 35.5938
3.805 3905.51 1102.49 0.28229 34.2034 564398.7871 48.1646 1834.36 13 44.5123
18.645 15620.9 5834.18 0.37348 153.476 2184644.9774 251.225 5441.5 101 26.0101
8.114 18679 5966.18 0.3194 179.757 2650896.6604 268.661 6149.89 213 23.8081
18.404 13605.5 4766.37 0.35032 139.793 1925984.7735 182.195 4672.34 112 26.454
19.379 8693.56 3265.99 0.37567 55.4973 1258363.384 126.928 4890.54 15 36.3849
17.598 7727.36 1370.27 0.17732 77.5656 1035613.7203 103.177 3130.45 27 37.1829
16.102 8865.32 3317.32 0.37419 95.8075 1223687.6881 122.748 3509.39 38 36.7233
14.923 8259.29 2719.28 0.32923 76.1237 1087132.699 122.143 3763.75 58 35.5364
1.655 7136.22 2645.28 0.37068 64.1673 1032920.1669 93.2759 3213.99 28 34.6186
4.128 6922.15 2143.02 0.30958 63.6012 989631.0485 91.6472 3146.95 31 38.8427
1.477 6449.78 1439.3 0.22315 74.7722 849784.4944 90.5322 3393.06 80 38.21
2.165 13274.3 3989.12 0.30051 169.746 1855447.6165 198.644 5089.76 67 26.6638
16.897 11155.6 3383.81 0.30332 142.703 1573166.4194 159.059 4251.55 133 29.6432
1.875 11065.9 2869.88 0.25934 136.217 1521525.7535 165.503 4450.72 96 31.5521
2.961 14255.6 3036.48 0.213 177.375 2014077.1687 216.182 4906.57 68 27.2363
10.322 5687.57 1392.65 0.24485 50.4035 792414.6209 62.2368 2799 29 41.8993
2.243 5604.18 1379.29 0.24611 51.2823 733127.7429 88.9084 3556.88 22 40.9181
2.763 12178.9 3893.46 0.31968 168.83 1721985.8314 212.393 4638.08 101 29.4849
1.748 11904 3159.63 0.26542 146.12 1699204.1576 173.975 4729.37 23 28.8602
8.331 13339.8 5612.72 0.42074 137.687 1857627.0749 202.768 4782.8 97 30.1194
15.752 8103.71 2485.18 0.30667 69.219 1142647.041 114.831 3110.95 35 33.9611
1.975 3765.85 1173.67 0.31166 36.1042 513417.2226 48.2496 1387.7 17 44.3268
14.882 6390.08 2063.85 0.32297 53.3978 872065.7572 81.8471 2463.51 43 40.4188
2.795 19206.8 6204.77 0.32305 264.764 2613629.666 323.4 5824.63 327 20.992
5.16 6666.05 1686.88 0.25305 65.9476 939714.1696 82.0352 3281.68 24 38.3151
14.809 7848.69 2814.13 0.35854 69.4373 1060209.1168 110.639 4161.36 67 32.2311
3.422 13718.6 3715.87 0.27086 154.948 1897518.6179 218.768 5416.61 215 25.7936
7.039 9146.98 3036.24 0.33193 98.1126 1253333.9054 145.759 3718.51 34 32.8273
1.452 7320.95 1721.31 0.23512 83.8564 1013466.1991 107.91 3835.84 17 36.1333
1.872 9286.4 1973.48 0.21251 92.7215 1299052.6477 120.727 4154.38 37 34.1534
5.355 14751.2 3844.49 0.26062 129.951 1982604.2973 203.858 4734.76 141 28.8851
4.634 12994.3 3594.77 0.27664 127.696 1780330.3004 178.654 4162.11 31 31.8839
19.749 10112.5 3631.53 0.35911 91.7464 1408549.4219 139.366 3681.97 91 35.4758
19.425 15927 6062.61 0.38064 131.808 2260865.2884 222.346 6279.39 98 21.4247
18.294 5253.91 1917.23 0.36491 36.6466 728099.5067 72.3719 2516.59 8 43.4537
8.566 9036.08 3473.8 0.38443 86.956 1254059.7802 124.95 4069.6 43 35.12
5.337 13989.2 4278.01 0.3058 153.752 1914843.5791 208.278 5631.61 10 33.3157
18.896 9268.9 3644.78 0.39322 96.0626 1296934.714 146.825 3273.54 94 36.7149
1.45 4390.52 671.38 0.15291 43.5158 594617.1047 60.9313 2568.19 12 43.1653
2.903 6396.75 2109.17 0.32972 64.4799 833819.6971 99.5718 2639.72 27 38.7631
9.355 6099.5 2534.46 0.41551 45.7407 848790.5575 82.8123 2212.03 37 39.4936
7.878 5915.26 1855.78 0.31372 55.4459 811070.7193 84.3491 3200.58 13 39.4094
1.892 13641.7 3672.22 0.26919 186.821 1883836.0415 212.284 4579.84 185 29.1308
17.079 8201.73 2865.04 0.34932 70.4354 1161722.3389 107.544 3339.72 64 37.238
0 7355.24 1512.22 0.20559 75.0114 993282.8538 115.556 3464.68 27 36.6828
18.481 13117.3 6444.76 0.49131 135.214 1794765.5565 231.099 5094.41 140 28.2733
4.913 6888.76 2382.42 0.34584 69.2425 969929.7654 97.2336 3209.68 36 36.8904
2.862 7511.48 1975.72 0.26302 85.9864 1055770.689 114.437 3417.92 38 37.2338
1.308 5945.25 2067.54 0.34776 58.7093 829401.3045 86.5812 3468.26 75 38.0649
7.148 19381.6 5881.5 0.30345 200.191 2687598.3404 297.196 6046.82 230 23.0833
11.251 7113.82 2401.32 0.33755 58.5207 991382.5985 93.3787 3096.29 46 38.4703
0.825 25210.5 8648.76 0.34306 190.69 3531460.0224 425.786 15340.07 151 25.5013
20.674 14439.9 6664.37 0.46152 161.672 1995348.076 252.705 5609.69 177 24.8632
15.358 9489.2 2632.9 0.27746 76.1758 1304060.8233 123.313 4319.72 52 37.0363
10.22 14489.7 5293.09 0.3653 95.5332 1968812.3208 207.626 5232.24 146 26.0014
16.571 6443.43 2324.75 0.36079 74.6845 862755.8582 114.332 3399.6 47 37.146
3.092 9763.57 2749.97 0.28165 111.431 1357572.8132 171.103 4202.52 52 33.7255
13.466 4753.63 1867.23 0.3928 52.8294 673228.6926 90.8141 2153.8 50 43.3195
2.177 8864.96 1797.52 0.20276 108.601 1202026.8897 131.167 4035.59 41 34.2566
2.527 8946.25 2600.19 0.29064 75.657 1241334.7336 112.681 4149.97 61 34.5376
13.039 8476.85 3020.54 0.35632 76.504 1152763.2319 125.38 3460.52 13 37.3816
10.252 7182.05 2359.8 0.32856 55.8177 973376.0357 101.397 2801.82 19 40.958
15.72 6309.16 1368.9 0.21697 62.6281 872506.15 69.9426 2750.21 33 40.3847
1.966 14819.4 4779.48 0.32251 174.819 2075461.9727 243.318 5297.57 146 23.7504
17.288 10101.3 3170.45 0.31386 105.916 1405285.0047 131.564 4430.94 47 31.3757
4.43 13179 3998.54 0.3034 149.945 1839480.2722 218.111 4690.99 111 29.1008
3.768 8277.16 2452.25 0.29626 90.1924 1114155.986 119.617 4277.58 107 33.2524
19.19 16982.2 4743.63 0.27932 183.555 2347319.2903 197.328 5738.57 116 25.2664
1.886 9462.94 2141.02 0.22625 111.627 1279553.1047 146.12 4079.58 38 34.1076
8.394 5820.5 1928.93 0.3314 55.9336 802673.5573 79.2056 3160.55 11 39.5384
2.117 9070.43 2113.93 0.23305 108.079 1249834.4403 139.433 4026.5 40 33.9976
2.28 6493.69 1705.78 0.26268 52.9662 909941.987 76.9265 3342.87 56 38.6855
10.497 6603.47 2050.3 0.31048 60.1729 899943.9871 88.3253 3236.02 29 38.2353
3.343 14832.6 6164.22 0.41558 82.6568 2003376.4322 252.171 20981.17 47 35.1973
6.093 6438.11 1963.9 0.30504 62.1014 882545.325 88.4107 2565.03 19 40.4105
5.28 6387.19 1555.71 0.24356 58.4257 840997.0316 76.1158 3115.79 34 39.6168
0.86 12412.9 2676.14 0.21559 153.787 1704335.9597 201.049 5153.37 146 29.7538
9.815 10204.9 3381.03 0.33131 108.207 1431867.0064 159.552 3638.29 76 36.0665
10.029 6063.73 2388.49 0.39389 59.2914 857784.1039 85.3898 2693.96 35 40.3893
19.547 12488.8 4041.28 0.32359 117.986 1677721.3178 161.42 5160.26 64 33.2032
3.753 23470.2 7193.56 0.30649 300.766 3269017.3498 387.7 6382.79 105 17.579
17.989 12467 3952.53 0.31703 120.009 1625878.5126 174.196 4684.74 93 33.9687
5.832 7373.54 1850.94 0.25102 72.2748 1035995.4007 82.2271 3018.03 21 36.6733
5.233 8569.51 2095.52 0.24453 85.6867 1215084.0242 118.469 3889.37 73 34.4689
1.182 14940.9 3689.94 0.24696 184.622 2104849.3761 214.553 5713.2 65 22.938
16.64 7677.77 3548.1 0.46212 81.4507 932775.2759 138.648 2316.07 75 40.5953
15.978 15941.1 5573.22 0.34961 156.567 2220699.4572 230.304 7932.78 54 25.7623
10.46 8938.94 4149.05 0.46415 92.4123 1281623.6675 131.192 3735.31 28 34.3761
5.148 15238.1 4535 0.2976 184.645 2102521.5961 248.959 5255.77 93 25.5394
9.165 9880.43 2824.41 0.28585 107.046 1355619.9042 136.504 3984.69 36 35.878
3.055 6561.96 1900.04 0.28955 63.9857 908399.8364 86.6121 3896.12 70 37.5316
2.195 5503.56 1323.03 0.24039 44.6948 786838.387 58.5922 2418.02 12 40.1785
4.312 11862.6 2817.75 0.23753 149.415 1587896.809 179.633 4510.74 60 24.4228
4.201 14262.8 4948.28 0.34693 130.587 2059589.8368 200.803 4840.18 125 29.151
2.874 8565.25 1962.18 0.22908 109.253 1201938.5997 146.283 4199.49 54 33.5756
11.96 14091.3 5097.66 0.36175 93.4892 1892267.2453 203.56 4780.9 114 30.579
4.428 14313.8 4864.14 0.33982 91.8533 1972511.8001 192.799 5070.02 149 28.5373
13.262 7635.65 2921.49 0.38261 61.1173 1048506.1217 105.709 3839.42 68 37.6294
18.137 9465.28 3017.2 0.31876 74.5875 1332420.0153 121.595 3741.08 53 37.4545
16.424 10572.7 3233.1 0.30579 95.8645 1425814.6266 161.418 4149.91 148 32.7768
19.628 15047.2 7020.1 0.46653 146.818 2087834.9087 249.015 4369.72 101 30.2627
3.886 19377.1 6378.16 0.32915 251.838 2673543.0312 318.066 5476.33 79 23.3446
12.32 9416.38 3637.32 0.38627 95.3281 1335252.9197 149.767 3866.18 90 35.4438
2.281 9053.62 2140.44 0.23641 86.9486 1288339.6787 108.191 4592.65 28 33.5188
5.532 7258.6 1383.35 0.19058 60.1399 1016992.519 76.4939 3446.44 47 37.7726
8.943 6627.94 2782.23 0.41977 62.1561 954949.3657 94.2195 2404.72 67 40.4961
3.693 17836.1 5278.61 0.29595 158.42 2512040.5785 253.024 5574.37 196 22.1107
11.733 4236.27 1376.4 0.3249 35.0902 576542.2839 54.2159 1426.57 34 44.3511
12.456 4838.86 1692.92 0.34985 46.3231 700043.1802 73.4881 2464.66 53 42.0444
11.683 8319 2654.18 0.31905 63.0818 1187976.5449 104.285 4248.88 45 37.8182
1.516 7511.85 1688.14 0.22473 86.303 1046228.3288 104.778 3840.11 25 36.2923
2.212 9482.44 2722.6 0.28712 102.246 1313907.5414 129.849 3869.28 14 33.9961
6.577 14465.7 4985.91 0.34467 102.038 1969329.7431 200.921 5037.19 146 27.7611
13.561 8077.33 1955.89 0.24214 69.5043 1134998.6449 102.856 3542.57 16 36.7329
0.556 9253.84 2652.01 0.28658 100.135 1266476.1288 160.321 4149.07 72 33.192
10.503 9054.19 3110.39 0.34353 100.999 1252553.576 145.086 3905.01 34 33.7522
2.993 11171.3 4172.41 0.37349 111.065 1650162.6262 154.318 4549.79 72 31.1566
0 7735.44 1706.44 0.2206 73.5278 1097281.6446 104.053 3952.37 49 35.0952
5.331 5228.85 1610.46 0.30799 48.6731 747852.3998 54.9062 1993.13 3 42.392
6.237 5941.69 1608.25 0.27067 59.8822 802172.2225 78.5753 3188.62 36 39.2894
13.336 9897.86 3043.84 0.30752 90.1432 1377066.1863 124.172 3530.74 65 35.5621
8.588 15505.2 5366.03 0.34607 163.5 2198535.6403 229.896 5903.91 152 26.7838
4.027 8428.96 2058.58 0.24422 96.4205 1194829.6782 119.74 3806.6 56 35.1576
5.298 5709.34 1421.13 0.24891 52.3057 789879.8074 82.9841 2645.72 33 40.838
17.583 6724.16 1799.22 0.26757 61.7573 922185.232 92.2208 3265.8 25 38.0097
2.073 13614.3 3796.36 0.27885 172.157 1879564.3348 197.959 5100.57 64 26.6874
19.205 14036.1 4798.67 0.34188 199.948 1971735.5746 229.154 4878.21 141 23.0604
13.988 11638.1 4583.39 0.39382 132.548 1603413.7904 181.688 4621.89 90 29.3328
3.805 12874.5 4174.61 0.32425 153.051 1768452.7926 196.773 4558.93 45 30.4081
3.132 6488.31 1968.19 0.30334 58.0428 850979.0102 87.7534 2672.19 42 39.1787
3.058 19195.5 6411.46 0.334 201.013 2565705.5022 301.331 5596.76 177 23.3663
11.934 7649.47 2421.72 0.31658 64.3883 1098224.7186 93.0226 3787.69 46 38.4719
18.823 8134.82 3106.02 0.38181 69.7501 1146484.3504 114.279 3311.01 30 37.2873
3.05 9068.27 1995.18 0.22001 96.7449 1281607.0094 130.622 3854.62 48 34.9438
2.159 9543.45 2234.61 0.23415 111.864 1324950.2436 132.213 4221.34 56 34.3281
13.335 6981.89 2188.04 0.31338 63.4287 966942.0505 101.125 3509.9 59 37.3867
15.214 8779.59 3421.12 0.38966 101.734 1253256.0577 134.156 4664.17 108 33.8939
8.811 16733.4 6088.38 0.36384 133.856 2382250.0225 244.839 6468.15 57 24.3735
0.842 11946 2737.53 0.22915 146.199 1631820.7653 198.922 4893.82 138 29.3127
1.625 12664.1 4082.6 0.32237 152.535 1800547.6985 210.449 4941.61 75 29.2647
15.663 11837.3 5049.76 0.42659 96.3511 1691186.5877 160.48 5165.75 49 37.2482
1.429 14566.9 3309.42 0.22718 182.402 2032596.1915 203.438 4063.98 148 32.0099
11.325 8625.69 3417.3 0.39617 73.5595 1231463.9387 111.509 3655.45 19 37.9844
15.929 8961.98 3421.6 0.38179 89.8607 1237735.3762 143.956 4021.18 34 35.2142
1.815 6612.86 2245.81 0.33961 62.407 922140.961 98.9037 3822.42 73 36.0666
16.462 6570.06 2560.55 0.38973 54.0008 863197.0061 108.933 3450.97 58 34.0708
4.342 6423.19 1188.1 0.18497 54.1855 847714.8902 70.9529 3244.2 40 38.0433
16.226 10551.9 3648.65 0.34578 87.8739 1522562.7981 150.498 4785.48 41 32.897
1.866 9306.91 2763.1 0.29688 100.055 1293200.1773 134.741 3496.76 120 35.0083
16.704 8573.63 2441.18 0.28473 61.3221 1204334.8172 100.48 3057.59 41 36.8556
11.249 16198 5391.66 0.33285 130.407 2298971.8028 225.87 5510.17 68 24.9599
9.007 7438.56 2442.88 0.3284 91.5449 1051582.324 99.3233 3452.36 27 36.9505
14.695 5967.66 1103.91 0.18498 52.5181 816963.0989 73.5838 2396.34 25 40.5292
3.052 13942 4074 0.29221 173.422 1982904.3912 198.751 4737.9 63 28.5884
3.17 8650.62 2425.01 0.28032 93.6804 1189130.0386 113.477 3636.6 39 35.1771
6.135 3375.97 1248.27 0.36975 24.5279 461737.1434 44.7686 1392.54 6 45.2663
2.23 10984.9 2665.08 0.24261 128.471 1488623.977 154.596 3686.64 16 34.564
19.755 8492.7 1958.19 0.23057 68.9086 1217185.4953 94.9999 3204.77 72 39.1549
3.778 5208.71 1214.92 0.23324 45.0719 722102.5886 71.2471 2681.78 17 40.4347
4.711 8138.85 2013.88 0.24744 96.6283 1149753.0969 101.841 3852.27 89 34.8174
7.928 5964.08 1950.12 0.32697 54.1675 815584.1398 83.6522 3160.93 12 39.5247
10.496 6746.08 1940.55 0.28765 67.9976 944219.3498 83.7765 3678.39 46 37.111
18.975 27671.4 10795 0.39011 268.687 3858804.0457 390.84 6353.75 168 23.402
11.022 18210.9 5745.37 0.31549 238.461 2484834.7616 318.982 5106.17 152 25.2792
6.423 6128.98 1451.85 0.23688 58.5824 827526.3708 78.7861 3202.84 27 39.0369
2.415 8398.47 2249.84 0.26788 90.9179 1184997.2157 123.07 3324.29 5 36.0082
18.162 12211.9 3656.73 0.29943 144.565 1722973.2242 164.091 4484.16 120 30.7101
12.872 4214.24 557.34 0.13225 39.7192 573782.0462 45.3279 2214.94 32 42.508
3.475 10243.6 3542.33 0.3458 89.3464 1471456.3229 142.423 3634.06 17 34.8223
1.753 9472.53 2244.6 0.23695 101.677 1321527.2096 134.816 4228.2 57 34.1433
3.42 9377.46 2104.36 0.2244 96.8279 1317344.8562 127.16 3855.91 52 34.8935
1.836 7127.24 2051.3 0.28781 68.4997 955422.7452 101.928 3606.84 85 37.2029
1.112 22638.1 5492.36 0.24261 337.405 3115601.7201 400.968 6217.11 155 19.8168
2.235 6537.05 1886.15 0.28853 69.366 935147.8733 81.6642 3159.38 13 39.4065
0.525 8682.58 2348.39 0.27047 98.1656 1221977.8772 130.857 3224.91 4 36.9912
11.219 3926.54 1157.77 0.29485 35.0194 534838.3448 50.008 1379.88 32 44.5265
11.794 10286.9 2922.37 0.28408 101.52 1463771.0961 146.511 4109.62 53 35.1281
2.323 7343.45 2773.7 0.37771 81.5535 1013734.8737 100.215 3356.73 57 38.5808
12.184 6303.94 2044.34 0.32429 36.6719 873947.8034 82.6206 2267.77 22 40.3577
11.327 4707.45 1784.38 0.37905 46.9947 681089.7568 67.6508 2345.3 58 41.3947
17.162 15147.5 5488.1 0.36231 142.337 2096988.2596 216.924 4699.81 98 29.1559
1.396 4246.02 1318.58 0.31054 35.6454 588383.8786 50.6559 1406.68 17 44.183
14.844 8232.2 1411.25 0.17143 77.4649 1113050.0572 102.051 3314.26 39 38.3958
3.301 6616.94 2182.14 0.32978 57.9753 931694.8721 92.4921 2822.48 42 39.9718
6.776 7912.45 1833.69 0.23174 71.7206 1080240.257 98.1802 3624.56 36 36.033
2.249 5957.05 1748.24 0.29347 43.1966 870833.6701 70.9541 2495.7 25 41.6257
1.662 9339.74 2799.06 0.29969 102.632 1276924.6648 136.928 3589.78 120 33.5974
2.935 8655.89 2220.6 0.25654 98.0298 1216529.7371 127.111 3774.84 46 34.7488
1.009 7190.75 2802.08 0.38967 64.3859 1055075.1829 99.8715 3203.47 29 38.8401
14.138 7719.08 2106.52 0.27289 62.2261 1069262.6857 100.651 3401.75 36 37.7466
18.877 13223.7 5870.04 0.4439 129.997 1831284.9512 204.903 4888 104 32.1747
4.951 8387.19 2278.04 0.2716 91.7564 1178104.0129 109.957 4083.76 125 34.6103
1.561 21862.9 6451.46 0.29508 307.897 2964339.1735 314.71 6669.32 290 20.0154
2.164 4754.13 963.74 0.20271 46.3356 665571.0919 60.5912 2785.42 13 42.1188
17.473 14778.4 4963.9 0.33588 141.718 2039977.4307 227.069 4136.7 152 30.8605
1.445 7505.08 2298.93 0.30631 78.819 1018824.3938 118.945 3106.21 76 38.9252
3.526 9189.4 2166.63 0.23577 82.0928 1313125.7494 122.16 3845.67 22 35.6074
16.055 7712.45 2912.02 0.37757 75.0895 1089567.0719 102.352 3972.32 35 36.0524
11.987 6321.9 1855.13 0.29344 63.9151 865087.6989 65.0437 3207.91 36 38.5378
7.824 6235.27 1787.24 0.28663 50.4699 882909.2988 91.1659 3307.91 10 38.57
3.204 10728.9 3122.13 0.291 115.096 1482321.848 174.449 3820.22 22 33.3138
7.099 9846.72 2284.11 0.23196 98.98 1356945.4109 120.386 4272.36 52 33.4137
1.653 5958 2062.3 0.34613 70.8099 825472.1945 88.2903 3030.17 34 39.2735
2.128 17523.9 4995 0.28503 224.449 2443665.0469 278.382 5692.07 199 22.0718
0 6812.34 2568.01 0.37696 60.4717 989494.5351 90.1892 3259.48 34 38.9395
2.056 9695.73 2541.87 0.26216 100.183 1382115.1196 152.25 3894.4 41 33.5747
17.877 11139.5 3900.88 0.35018 84.8751 1596337.2852 144.338 4908.92 73 34.9302
2.817 8094.96 2372.41 0.29307 81.918 1117757.2287 103.785 4400.49 59 33.8533
0 7932.62 1994.97 0.25148 69.8073 1110612.1989 115.515 3623.06 4 35.7825
3.043 8579.71 2290.75 0.26699 119.991 1164358.1187 130.106 4057.75 111 33.5585
15.915 7016.08 2354.65 0.3356 53.6786 995986.3272 88.663 3344.51 3 40.2953
5.808 5839.74 1658.76 0.28404 58.8301 779812.2483 81.8107 2989.34 37 40.0981
3.627 10607 2738.29 0.25815 130.287 1460329.48 157.268 4824.33 71 29.5595
3.045 7650.22 2418.75 0.31616 70.0034 1040703.4256 102.538 3419.04 74 36.8497
3.891 10040.4 2437.71 0.24279 87.9793 1417015.4875 129.728 4785.52 28 32.3895
2.099 9477.6 2961.1 0.31243 87.7097 1281181.8515 129.155 3888.62 41 35.0208
15.266 13109.3 4629.25 0.35312 127.375 1864371.8546 172.726 4887.31 147 29.3633
2.329 4357.76 798.49 0.18323 39.4932 573535.7002 62.5392 2624.54 12 43.4835
15.9 9567.13 2715.47 0.28383 90.2935 1385359.9525 125.993 3739.18 75 35.4598
8.607 7852.92 2399.29 0.30552 64.9361 1087675.6324 98.7637 3472.04 47 37.2743
18.646 13435.4 5997.24 0.44637 97.827 1879137.5728 200.491 3895.12 112 32.7497
1.426 13147 4100.1 0.31186 153.852 1858378.5443 214.358 5004.43 76 28.7302
1.185 7994.54 1960.8 0.24526 90.5908 1068702.8578 130.362 3416.95 15 37.2435
4.698 7932.81 1998.26 0.25189 68.6431 1079913.9848 110.033 3466.68 39 35.4187
14.826 5643.51 1524.53 0.27013 61.2316 713353.0304 87.2559 3103.09 16 35.8947
19.876 13279.2 5970.64 0.44962 171.298 1831913.5524 254.768 63609.66 111 31.204
1.926 8983.73 2538.17 0.28252 85.1632 1230019.4476 120.196 3850.61 26 34.8366
7.486 8821.12 1500.28 0.17007 77.7086 1191043.0066 99.3303 3757.55 39 36.5089
1.249 14993.4 3895.45 0.25981 184.224 2122391.0771 217.616 5696.71 69 23.0322
9.012 5003.71 1603.83 0.32052 39.7905 665335.0591 71.8347 3138.33 15 41.7761
1.303 14933.1 4716.58 0.31584 152.903 2070500.9156 231.286 5358.54 194 26.3754
20.546 12598 4287.08 0.34029 157.752 1753511.6122 216.178 4445.21 151 30.8784
9.726 17616.1 6248 0.35467 131.37 2325485.2803 260.737 5229.49 157 25.8162
17.395 8454.76 2114.97 0.25015 56.1939 1180792.9901 97.7716 3601.37 27 39.8544
2.375 4380.89 1164.74 0.26586 45.0019 552992.2161 63.9749 2026.36 22 42.8624
12.987 7229.32 2192.61 0.30329 55.335 999123.469 93.4638 3336.69 25 38.2677
5.562 5233.78 1168.13 0.22319 53.475 727935.2732 63.4258 2812.04 17 39.8232
14.014 7383.37 2124.26 0.2877 62.2165 1059770.3568 90.9051 2420.26 68 39.9775
14.307 8959.42 3732.93 0.41664 71.8185 1275908.2251 133.02 3428.72 21 35.1539
4.786 8224.38 2547.01 0.30969 90.0116 1112973.166 117.026 4274.11 103 33.3403
0.597 9501.27 2682.04 0.28228 99.4986 1297886.0328 160.406 4141.77 75 33.2323
19.471 7069.72 2549.7 0.36065 66.2801 973415.5286 134.424 3178.93 44 36.5519
19.541 14302.7 5336.33 0.37309 85.3488 1994687.6137 228.008 5772.5 104 28.5364
1.707 13849 4025.42 0.29066 200.833 1927500.0735 250.612 5301.93 284 24.9407
7.719 7283.24 2127.19 0.29206 88.7824 1009013.6967 106.115 3322.4 27 37.7619
19.031 11572 3859.8 0.33354 145.557 1576695.6308 187.1 4800.12 100 29.0516
2.54 9991.02 2293.38 0.22954 97.1939 1380871.3202 125.946 4406.82 39 32.7496
1.62 6707.24 2183.14 0.32549 63.5459 906383.6663 100.703 3121.59 18 40.2996
14.451 6373.95 2275.84 0.35705 64.3785 883935.0676 85.7568 3430.13 74 37.0221
10.7 4897.61 1434.99 0.29299 43.6804 691488.5232 65.5956 2524.74 43 42.7808
14.744 8646.41 2574.14 0.29771 52.0932 1173611.7112 114.639 3889.6 26 36.0445
2.001 11770.4 2922.4 0.24828 157.325 1621157.0339 185.562 4185.27 62 31.8218
9.502 5856.63 2290.52 0.39109 45.9514 841418.3035 85.1854 2556.66 39 42.6898
16.489 9604.43 2800.07 0.29153 74.6886 1356682.3863 116.545 3936.24 38 33.7705
16.861 8701.13 3483.86 0.40039 38.5302 1154738.7053 120.883 3898.68 85 38.2897
7.709 6537.28 1928.44 0.29499 55.3075 888944.6155 90.0879 2429.71 25 41.5172
11.196 12310.4 4958.98 0.40282 102.735 1729155.359 169.894 4191.26 67 32.9828
1.259 5578.33 1116.13 0.20008 57.6882 775580.7078 74.8081 2649.52 24 40.7863
1.308 7185.81 2657.96 0.36989 63 1046311.8021 99.356 3242.14 28 38.8903
4.019 14851.9 3486 0.23471 212.809 2053400.6052 244.054 5101.51 148 25.3752
2.66 16114.6 4112.86 0.25522 163.922 2300850.1133 214.214 4927.93 43 27.1584
4.696 12436.1 4176.39 0.33582 164.887 1725674.2325 188.556 4862.49 61 28.4846
3.58 5730.81 1967.46 0.34331 68.4013 797603.6883 79.4927 3693.36 74 38.6164
4.225 14351.5 4600.87 0.32058 158.776 2055434.4357 217.106 4726.06 64 28.5601
2.408 12782.9 3673.28 0.28735 155.657 1796812.1181 190.74 4745.77 78 29.0838
7.633 9290.34 2899.14 0.31205 69.1241 1302337.7456 138.459 4334.85 7 33.154
16.306 10938.6 3623.23 0.33123 102.004 1522320.9658 150.814 4601.06 120 31.1182
5.204 8084.92 2211.55 0.27354 90.7685 1074229.7433 135.242 3828.57 34 30.6645
16.475 7326.62 2586.71 0.35305 67.9097 973304.9044 107.539 3092.22 40 39.5324
0.647 7863.06 2003.24 0.25476 84.5573 1101691.5489 125.65 3129.74 4 36.9864
18.984 7092.65 2480.66 0.34975 61.0407 960828.1648 104.731 2767.93 32 40.1347
4.635 9870.54 2678.82 0.27139 121.933 1379853.7702 150.736 4313.61 68 32.9661
2.395 7524.91 1907.53 0.25349 68.8851 1087785.6591 98.5949 3114.16 20 37.5996
11.376 8184.24 3051.84 0.37289 81.6815 1111115.6919 110.582 3623.31 28 36.3253
18.242 12131.3 4823.71 0.39762 99.396 1686541.0553 180.92 4094.79 47 33.3562
15.928 5197.92 2137.67 0.41125 33.2291 734409.5982 70.5348 1653.3 39 44.9336
5.652 7100.26 2144.7 0.30205 57.2757 961820.361 100.955 2913.93 15 38.6264
2.351 16970.3 5587.31 0.32924 206.693 2229253.2797 269.656 6137 246 21.934
1.852 5495.29 1780.71 0.32404 67.466 754891.2887 79.4929 3006 31 40.4661
4.105 21350.9 6977.62 0.3268 259.555 2973844.4465 331.927 5545.56 139 23.3018
8.413 8559.01 2014.21 0.23533 59.3272 1216662.2975 91.0821 3189.03 27 38.5358
12.228 6060.88 1540.7 0.2542 70.8151 816576.0362 91.1852 3185.82 46 39.131
3.317 11222.3 3670.91 0.3271 126.764 1541143.7816 164.489 4898.56 70 29.051
2.803 14281 4251.36 0.29769 175.349 2015506.6832 230.894 4504.94 25 30.0785
11.404 3881.88 1235.68 0.31831 34.6864 527278.5092 49.785 1364.94 34 44.6544
12.661 8133.47 2539.33 0.3122 57.8653 1176948.5736 99.793 2947.52 11 38.2708
6.974 8582.61 2140.11 0.24935 96.0488 1165650.3021 97.7347 4002.35 14 36.7452
11.533 7206.33 2290.14 0.31779 50.3814 1006527.8502 93.7626 3899.96 34 37.509
2.322 6092.64 1713.8 0.28129 53.7129 852409.6624 75.9776 3229.48 52 39.8182
6.128 14111.3 4782.41 0.3389 162.125 1966582.2746 230.214 4766.99 103 28.9236
17.726 6066.88 1094.14 0.18034 58.0753 802779.6483 64.668 2999.04 34 38.2889
18.568 7736.94 1731.4 0.22378 84.363 1092857.3366 122.578 3583.44 96 38.3041
4.204 7243.53 2057.07 0.28398 66.6182 1008189.3213 96.0069 3064.05 55 39.2259
3.756 9105.05 2110.11 0.23175 97.8518 1278955.1769 128.357 3997.26 47 35.0869
3.399 8267.73 1951.89 0.23608 86.3387 1166105.4749 97.6918 3759.4 64 35.4199
16.603 7868.71 3048.23 0.38738 60.0247 1060141.0352 112.365 3918.99 77 36.0453
4.402 4957.58 1312.72 0.26479 40.6577 686352.7697 59.0011 2595.21 57 41.6938
11.403 5759.81 2144.38 0.3723 45.2132 817838.7144 92.3981 2578.23 33 41.7571
17.008 21079.5 6223.71 0.29524 209.433 3018973.5423 314.332 6596.12 265 24.4139
2.358 18414.5 6744.4 0.36625 243.217 2524198.4621 267.523 5634.7 114 22.4298
5.4 14346.1 5177.45 0.36089 163.663 2001887.9375 211.837 4996.08 79 27.5044
3.973 6146.86 1050.45 0.17089 55.4867 857405.8131 64.3761 2993.73 12 39.9338
9.75 3620.51 1303.39 0.36 25.6829 495275.5282 45.5509 1446.34 16 45.5846
17.987 8836.03 2438.71 0.27599 90.1977 1189598.9869 133.834 3974.55 34 34.6692
19.252 9076.95 3689.68 0.40648 100.531 1242079.2961 176.627 3668.55 130 34.8231
3.526 5285.02 1741.93 0.32959 42.3724 733610.4277 66.8685 2883.56 51 37.7907
17.682 11280.9 3498.64 0.31013 117.303 1616198.7783 158.503 3669.71 155 36.0225
4.841 9196.63 2722.02 0.29598 79.4848 1278710.1842 114.914 4407.36 64 34.214
5.525 7021.54 1647.68 0.23466 64.2898 972562.6692 88.6381 2862.19 78 38.9359
1.101 14500.7 4149.06 0.28612 188.928 2009304.1203 224.308 5591.38 141 22.8253
3.531 21345.5 6810.63 0.31906 254.793 2983406.0672 339.794 5548.79 69 23.165
17.514 12752.1 4314.2 0.33831 138.527 1798176.8846 205.479 4399.77 91 31.2542
14.66 6090.46 1953.25 0.3207 54.5619 834053.7465 81.8578 2360.37 43 41.4924
1.043 5279.17 1136.55 0.21528 45.9736 757722.5142 70.9922 2852.09 58 40.2008
2.878 13691.2 4020.17 0.29363 150.641 1886546.6239 196.645 4680.62 34 29.5894
2.787 11123.9 2954.92 0.26563 128.728 1512116.6882 159.407 3855.75 22 32.6841
8.014 8175.26 1449.24 0.17727 75.9565 1102323.2711 101.904 3524.49 31 37.6154
4.009 10917.8 4835.73 0.44292 141.774 1480520.7979 202.774 4547.58 174 30.1289
7.069 6645.65 2283.01 0.34353 48.4476 855359.0726 103.239 2208.51 43 42.2603
4.505 5421.59 1768.68 0.32622 61.4863 709565.4118 88.6788 2676.52 26 41.08
20.032 12363.8 5528.2 0.44712 103.047 1605975.6337 221.715 4873.33 76 31.7337
5.259 9627.26 2907.16 0.30197 100.714 1358204.8702 140.282 3887.03 17 34.624
11.808 8136.96 2359.37 0.28995 87.7108 1116842.4647 94.4821 3783.17 24 34.8164
5.248 14185.9 4391.91 0.30959 177.768 1960618.5457 241.491 4341.08 37 30.0177
0.639 9486.06 2662.65 0.28069 97.6645 1301490.6208 163.081 4147.26 74 33.1873
2.378 17765.6 6211.05 0.34961 238.807 2396953.1571 281.706 5585.03 142 20.6939
15.046 8582.47 3289.88 0.38332 95.6102 1166992.2968 149.449 3805.41 62 36.252
12.951 7292.83 1393.58 0.19108 67.0089 1021411.8178 88.5438 3121.83 66 39.5447
15.482 7662.61 3160.41 0.41244 71.1874 1011149.7734 118.999 3093.33 87 39.0601
1.611 13692 3664.12 0.26761 192.966 1877160.3123 220.066 4575.84 178 29.1416
4.052 16222.8 4388.63 0.27052 241.386 2200152.7553 266.94 4807.68 285 27.5003
1.502 12271.9 3206.91 0.26132 148.646 1756609.0781 174.952 4683.91 28 29.0243
3.281 11983.9 3455.57 0.28835 127.037 1705213.8886 173.058 4463.94 48 30.7803
2.758 8225.76 2882.55 0.35042 75.7976 1153804.5858 124.457 3407.27 43 36.9368
0 8589.53 1928.45 0.22451 58.7719 1203016.7752 95.4863 3379.23 23 41.3394
5.055 8383.67 2646.68 0.31569 91.1684 1127697.6562 136.085 3981.74 40 35.6039
1.973 11928 3000.9 0.25158 146.741 1650510.1043 201.477 4185.32 69 28.9619
1.103 7338.46 2878.88 0.3923 63.8447 1071102.7571 97.6804 3210.96 29 38.8758
2.76 8951.77 1845.58 0.20616 97.1566 1252392.8859 120.787 3851.55 67 34.9325
9.889 8337.58 1373.65 0.16475 75.0922 1105067.3678 100.708 3905.7 30 38.1016
19.999 12191.1 5514.78 0.45236 104.703 1666160.6855 202.288 6400.03 157 27.5843
2.063 9615.89 2773.12 0.28838 97.6692 1360345.6396 136.638 3677.27 128 35.5624
3.278 5590.71 1430.92 0.25594 43.5552 796191.4496 67.1495 2509.66 5 40.1836
15.261 19893.2 7981.31 0.4012 268.362 2718097.5038 344.794 6021.41 251 21.0973
12.732 4828.14 1144.12 0.23696 41.5757 665465.9299 66.7739 2653.5 26 39.6355
4.478 7307.16 2809.19 0.38444 68.0522 1046395.9725 96.8965 3968.69 71 37.0487
0.869 14499.5 4049.68 0.27929 193.125 2009138.7833 222.581 5614.67 136 22.9619
12.674 8538.14 2668.38 0.31252 59.8675 1201414.3924 111.193 2946.7 8 37.8822
5.381 18084.1 5727.87 0.31673 243.602 2492372.4963 307.333 5345.72 277 25.796
1.349 10849.3 2680 0.24702 153.695 1528536.5991 189.236 4607.59 60 29.9254
2.163 9500.28 3239.22 0.34096 103.535 1336832.8145 131.869 3712.25 14 35.0263
9.98 6373.6 1619.07 0.25402 65.4305 894051.1456 70.2733 3644.79 76 38.9086
12.67 6001.6 1731.09 0.28843 55.7944 820445.0505 84.6195 2455.92 27 40.3259
1.103 8016.56 1735.13 0.21644 76.1742 1144925.7809 111.2 3921.46 103 35.5075
2.378 8463.57 1890.01 0.22331 81.6124 1194357.9369 100.217 3832.19 10 34.2998
2.72 9228.49 2912.83 0.31563 85.4307 1291535.2849 139.253 3919.22 3 34.9569
17.599 8426.32 2598.91 0.30842 96.8621 1102634.1303 137.444 3730.33 92 36.2785
19.972 13530.2 5287.22 0.39077 125.763 1862372.4706 207.932 4456.19 80 30.5366
11.26 6300.44 2765.23 0.43889 50.8074 887016.4585 117.273 2711.51 64 39.8185
4.463 16055.9 4006.08 0.2495 245.457 2190553.2368 245.576 4800.32 296 27.952
16.086 7532.5 2695.13 0.3578 70.9431 1006716.2268 124.743 3806.56 67 32.0464
2.111 7362.61 2020.68 0.27445 69.8312 1017506.1388 100.83 3565.63 35 36.2455
9.192 8128.99 1777.57 0.21867 74.2097 1119717.7572 104.006 3674.01 38 46.5464
5.201 10050.7 3432.52 0.34152 100.248 1479591.8724 158.077 4193.46 79 33.3289
2.599 15397.7 4693.97 0.30484 177.856 2095614.9697 205.628 4930.46 189 28.9037
3.091 11021.1 2927.33 0.26561 128.51 1571307.37 170.061 4415.67 51 31.9363
20.123 12223.8 3838.15 0.31398 113.778 1792437.2815 175.184 3546.37 157 36.4599
2.305 14666.4 4711.02 0.32121 155.193 2102955.9192 244.44 4961.75 48 27.0535
5.863 16993 6107.21 0.35939 184.077 2299775.5597 293.908 5614.48 175 26.2127
3.372 22771.3 7039.69 0.30914 315.611 3143441.6371 374.362 6283.2 107 17.6111
4.024 12116.8 4762.59 0.39305 104.316 1714800.5897 182.264 3913.39 13 35.2339
3.633 10657 3911.79 0.36706 127.704 1470392.6811 181.454 3876.55 29 33.7359
3.63 13876.1 3964.62 0.28571 162.64 1989499.0537 228.383 4559.79 51 26.4972
4.458 14749 3118.47 0.21143 179.213 2068895.1715 228.623 5029.42 85 26.9522
5.277 12973.7 4823.83 0.37181 106.421 1768836.7153 199.288 4737.28 143 28.9887
2.06 6037.98 2059.88 0.34115 57.917 841162.0466 88.1167 2695.67 41 40.6986
2.508 9413.22 2295.75 0.24388 88.1962 1350331.8144 116.696 4057.57 91 34.9538
1.823 7262.21 2375.39 0.32708 76.1827 1003327.6883 97.2383 3760.94 32 36.0888
1.896 11251.1 3138.14 0.27891 133.744 1551513.7481 162.209 4441.62 92 31.2951
2.668 14945.6 3725.47 0.24926 204.762 2052061.1656 260.693 5059.68 172 25.4996
3.142 8335.12 1722.68 0.20667 98.5435 1192653.4115 115.941 3777.89 44 35.3459
2.19 9514.76 2508.56 0.26364 119.814 1308243.1194 134.979 4161.09 117 30.695
3.255 10518.9 2479.54 0.23572 90.2555 1472291.3492 143.905 3833.52 127 34.7249
4.106 14187.3 4405.73 0.31054 135.661 1986292.2088 195.261 4790.23 72 29.2641
11.489 5547.66 1652.92 0.29794 72.3963 744081.8917 86.7232 3302.46 46 38.8729
6.847 14909.3 4689.81 0.31455 169.339 2050688.6188 225.364 5501.12 125 24.8631
2.822 8699.34 2655.55 0.30525 114.433 1190281.808 141.486 3802.77 79 34.9589
19.979 16110.7 7118.02 0.44181 135.575 2087911.0911 276.53 4546.48 109 30.4611
15.129 7256.87 1369.6 0.18873 59.6107 1064181.9264 94.23 2429 68 41.158
2.174 11276.9 2643.64 0.23442 131.11 1553152.8718 150.889 4413.65 82 31.1018
9.138 16211 5552.93 0.34254 173.601 2301749.2199 269.49 5573.02 203 27.0069
16.204 8307.96 2551.5 0.30711 64.7983 1205565.4627 114.74 3242.93 54 38.6993
7.836 5967.56 1933.09 0.32393 53.6928 815263.6143 84.5481 3193.53 13 39.4006
2.042 13137.3 4252.33 0.32368 149.96 1858133.5804 198.035 5120.67 170 28.6494
9.784 4905.85 1682.4 0.34293 29.4286 698316.233 60.2098 2406.4 43 42.7271
6.74 15354 5087.48 0.33134 164.36 2095976.7908 205.404 5036.29 69 27.4565
10.98 8636.8 3071.58 0.35563 80.0328 1157857.8114 118.746 3860.18 37 36.9665
3.066 12953.2 4316.91 0.33326 135.224 1823967.013 194.695 4334.67 49 31.5703
14.049 5493.85 1386.82 0.25243 64.5563 735958.3097 82.1428 2605.38 56 39.8607
17.655 7146.9 2529.47 0.35392 59.1501 928367.5806 120.073 3149.28 57 38.1424
2.022 11711.6 3154.24 0.26932 135.474 1615308.0184 157.458 4496.1 89 31.3426
17.174 14998.9 5506.9 0.36715 125.808 2095741.4854 197.676 5730.25 143 28.3517
3.288 15437.9 5936.43 0.38453 184.715 2143910.2146 255.682 4382.36 54 26.259
1.539 7034.32 2238.05 0.31816 76.4392 963134.9793 111.301 3069.56 82 39.1113
2.115 5427.7 1465.63 0.27002 62.2391 674705.3681 87.8011 3081.19 16 39.6066
1.809 6537.05 1886.15 0.28853 69.366 935147.8733 81.6642 3159.38 13 38.7006
0 12339 3986.99 0.32312 123.035 1700544.4946 183.307 5350.54 41 46.5464
1.861 10668.2 3193.78 0.29937 124.703 1442020.5109 166.742 3958.03 34 33.3029
1.755 10701.2 4290.99 0.40098 134.791 1431977.265 205.483 4546.55 176 30.9772
7.416 11857.6 4007.22 0.33794 108.994 1714910.1029 173.5 4706.27 67 30.2233
11.343 17973.7 6713.95 0.37354 177.584 2485984.0748 284.475 6067.1 67 27.8107
6.226 12694.9 4499.34 0.35442 164.648 1797808.0233 231.88 4675.03 109 29.2103
17.781 16673.9 5272.74 0.31622 195.466 2280821.1037 256.632 6192.24 198 19.5094
2.909 9705.04 2789.49 0.28742 93.8699 1334602.1871 123.103 3907.34 40 35.0412
1.144 3622.05 959.51 0.2649 35.3647 511052.1659 43.6535 1788.7 12 44.5204
20.493 11937.1 3818.79 0.3199 112.535 1649239.8129 166.291 4826.69 120 31.2096
1.932 6680.69 1744.47 0.26112 52.2965 941162.7521 76.513 3314.38 58 39.0646
3.133 8709.89 2445.19 0.28073 90.4932 1220456.6316 111.43 4239.5 47 36.2998
2.475 5692.01 1414.69 0.24853 63.6363 708999.3503 94.6398 3096.14 18 39.4005
20.057 11910.5 4320.56 0.36275 98.968 1630844.9097 182.238 4270.92 66 31.877
6.011 5812.66 1928.94 0.33185 62.7325 780169.6481 81.7077 3407.97 36 37.8523
17.619 10238.1 3382.9 0.33042 112.295 1430351.2002 136.687 4268.27 106 29.1375
2.324 10280.6 2448.67 0.23818 150.53 1365601.6266 165.333 4667.1 53 30.6866
3.187 14456.8 4533.15 0.31356 179.649 2075637.108 259.391 4917.05 91 27.1316
1.703 3943.18 1041.69 0.26417 32.5753 560006.778 46.543 1786.03 12 41.2001
14.837 10386.6 3452.95 0.33244 130.412 1483446.1289 203.563 4035.72 89 34.1546
1.937 5429.1 1575.46 0.29018 47.458 754171.6218 74.0363 3095.15 16 41.6861
3.816 14087.6 4679.34 0.33216 172.864 1946643.6952 228.888 4883.23 140 28.0985
7.742 22255.9 8615.41 0.3871 182.82 3064213.407 357.718 14641.85 128 27.7218
2.284 4977.23 1347.86 0.2708 46.9127 687762.7987 57.5169 1920.46 17 43.3073
10.372 7728.1 2208.95 0.28583 95.5685 1077887.0464 107.677 3191.12 32 36.4987
12.17 6059.68 1652.34 0.27267 64.1218 838553.9501 86.9748 2844.85 23 40.32
6.848 5416.49 2242.79 0.41406 34.3671 768445.101 74.3528 2591.95 35 43.1413
2.994 8445.43 1620.04 0.19182 98.4914 1193069.9371 116.478 3841.34 49 34.7713
15.781 11960.4 3685.89 0.30817 110.448 1738231.6684 160.139 3750.11 141 35.6808
19.865 16177.4 6951.27 0.42969 210.766 2154017.4742 298.195 5334.03 220 24.3519
1.54 16536.6 5540.56 0.33504 216.958 2298903.3528 258.969 5463.52 287 23.8273
3.249 10012.6 2683.74 0.26803 97.8183 1393340.5196 126.019 4324.71 43 33.2669
5.994 9132.31 2419.91 0.26498 96.0006 1249539.0783 88.9036 4060.7 16 34.1799
2.845 11284.7 3205.86 0.28408 146.398 1591211.6209 156.151 4146.58 134 32.3779
16.227 14045.6 4292.05 0.30557 157.057 1924732.1712 217.908 5221.17 12 30.8532
9.195 7446.5 1744.35 0.23425 76.5403 1014441.585 94.2778 3488.63 47 37.7538
18.534 11097.6 3499.94 0.31537 141.138 1547753.9024 165.523 4133.44 123 32.97
10.807 8133.15 2072.22 0.25478 73.1136 1083767.6475 106.432 3901.59 82 37.0563
4.753 19328.4 5818.17 0.30101 204.363 2697452.9696 317.316 6022.71 237 21.1134
2.295 5778.55 1489.74 0.2578 62.4237 721477.6777 89.5373 3098.6 16 39.3508
1.137 23535.5 5680.47 0.24135 315.901 3226548.619 411.178 6228.15 127 19.8262
14.461 8518.33 2693.42 0.31619 75.0831 1212915.7061 104.406 3425.13 30 35.6342
1.322 10969.7 2645.31 0.24114 117.211 1509869.6745 175.199 3877.36 57 33.3082
1.977 5484.01 1453.23 0.26499 46.5199 765915.5587 71.9107 3106.66 16 40.3177
1.419 5739.11 1336.47 0.23287 51.8119 831641.3985 71.2598 2859.28 59 40.3002
15.932 8453.47 2990.97 0.35381 70.934 1198171.9262 121.584 3221.91 86 38.4492
2.641 7961.79 2148.35 0.26983 66.5126 1060293.474 96.0983 3508.32 22 37.0579
14.15 10955.8 4373.79 0.39922 99.7345 1562991.6866 142.559 3679.3 38 31.7276
5.026 4268.34 1080.62 0.25317 30.2149 595806.9459 49.7492 2069.23 42 44.5321
13.276 5691.17 2110.42 0.37082 65.8625 765181.3411 96.3825 3112.81 39 38.7661
9.669 4567.92 1220.66 0.26722 43.6176 619507.3179 73.0589 2557.9 10 42.3443
8.886 7967.98 1814.78 0.22775 56.9772 1120004.8306 87.5365 3575.67 19 37.8771
11.282 8579.27 2108.28 0.24574 76.9909 1154974.8396 99.3322 3671.56 39 36.4394
3.562 4618.35 856.14 0.18537 45.3572 650759.354 53.7983 2558.56 20 40.7701
9.916 7353.42 2762.39 0.37566 54.9725 1017014.9756 121.966 2736.67 59 39.7414
1.932 14135.8 3787.5 0.26793 180.199 1927214.545 226.591 4623.78 176 28.8721
2.429 11539.5 2805.99 0.24316 156.669 1654993.481 165.25 4770.92 32 29.1981
20.756 12505.6 3210.35 0.25671 108.529 1787958.0688 169.267 3704.7 125 35.9557
1.263 15869.9 3858.01 0.2431 199.354 2234622.9286 269.497 5562.41 82 23.5669
2.135 13580.7 3704.43 0.27277 164.024 1897645.1319 213.588 4981.15 206 28.0365
11.139 4035.46 1208.51 0.29947 34.2434 551732.5599 50.1688 1388.67 32 44.4616
14.795 6727.97 2203.08 0.32745 66.1031 896540.4053 101.856 3259.7 83 39.7102
12.812 6348.93 1471.87 0.23182 57.6883 869584.6361 73.6151 2595.35 23 39.9695
4.073 5768.82 2291.85 0.39728 56.6733 801203.5026 76.4425 2684.6 27 40.7067
13.729 13186 4706.29 0.35691 156.934 1854959.1433 233.425 4647.62 127 29.7105
16.203 13656.7 3413.84 0.24997 138.239 1874890.7514 213.019 3663.47 119 34.3951
17.128 23904.4 6585.35 0.27548 214.824 3358690.898 303.205 6567.95 256 19.5961
4.357 5076.51 1491.55 0.29381 49.7675 722614.919 66.6813 2060.42 2 41.9873
9.254 6778.68 2072.62 0.30575 61.2659 907053.7451 102.872 3647.63 67 39.1159
1.705 9662.31 2389.13 0.24726 105.715 1375365.3244 149.426 3994.22 34 29.2653
2.204 5914.76 1722.51 0.29122 60.3458 741568.7738 96.6734 3127.69 16 38.8733
18.392 13543.7 4444.38 0.32815 139.197 1943472.4083 214.044 5068.35 95 26.7631
1.956 12602.5 3408.32 0.27044 154.972 1798693.172 183.174 4782.51 44 28.3457
16.222 9314.62 3731.49 0.4006 67.552 1309008.1089 132.183 3865.72 52 34.9595
5.095 6536 1050.16 0.16067 62.9196 885333.9203 82.5171 3196.76 55 38.4338
15.993 8803.25 3483.03 0.39565 75.41 1207872.7985 131.252 3829.99 23 35.3965
1.574 6824.04 2360.33 0.34588 60.0889 943920.8643 102.999 3756.66 72 37.6783
1.468 3952.98 1217.87 0.30808 34.3014 539652.4043 48.9034 1408.76 17 44.2712
11.214 3918.11 1152.33 0.2941 35.2801 535633.0192 49.6635 1387.1 32 44.4587
3.003 8802.84 2568.89 0.29182 77.041 1227946.5542 112.392 4260.31 60 34.4086
1.46 9663 3120.19 0.3229 97.8838 1349208.2624 146.993 4256.77 36 34.1099
18.652 10100.9 2770.66 0.27429 98.5638 1408663.7987 131.1 4145.82 82 33.4173
3.607 5111.33 1957.62 0.38299 24.9752 704003.9415 69.6626 3064.82 64 39.8013
4.692 14560 4998.61 0.34331 162.094 2085628.0855 235.889 4617.61 61 28.7521
8.67 9898.42 3763.76 0.38023 90.1029 1403446.5497 146.72 4433.11 54 36.7976
1.835 7671.16 1972.13 0.25708 67.0392 1057812.7638 107.054 3590.27 23 36.7191
14.307 7034.41 2156.5 0.30656 64.42 955257.5535 102.166 3383.56 53 37.8889
2.123 8584.66 2601.47 0.30303 96.4928 1215773.6992 112.321 3605.01 94 36.7163
2.628 16925.4 4201.91 0.24826 207.748 2344273.2525 264.853 5284.5 168 25.1455
19.452 11848.6 4363.1 0.36823 108.408 1664856.4398 164.4 5326.2 91 32.5488
17.56 7432.01 1692.12 0.22767 68.757 1054506.4041 87.5253 2773.3 48 40.247
1.212 8840.63 2507.31 0.28361 89.0498 1250413.3332 133.948 4075.5 167 33.5171
4.821 11785.2 2573.35 0.21835 126.18 1619385.2827 151.194 3899.28 21 34.7056
0.85 9556.86 1847.49 0.19331 105.466 1351287.6652 126.533 4262.27 48 33.1242
16.209 10666.3 3815.81 0.35774 97.3297 1415807.113 154.257 4855.5 47 33.3503
4.945 12591.5 3219.78 0.25571 163.422 1732391.9552 207.866 4531.62 130 27.9192
0.952 10197.5 2043.33 0.20037 101.565 1443271.4757 137.695 4254.31 43 33.6813
15.104 6494.75 1703.54 0.26229 62.538 942739.7363 91.2591 2772.81 82 38.9535
9.527 12610.6 4630.44 0.36718 126.474 1772035.4743 220.961 4755.59 100 28.0628
12.127 8832.94 3720.84 0.42124 78.6125 1203643.8334 137.287 3870.99 24 35.8709
10.962 9019.6 2465.06 0.2733 64.5544 1302923.9102 100.42 2778.68 64 39.446
15.965 9261.34 2946.37 0.31813 108.068 1274398.698 141.056 4073.11 125 33.5798
1.904 13079.9 3387.91 0.25901 143.353 1794572.1677 189.514 4724.45 26 29.4626
1.397 8777.6 2301.88 0.26224 91.7574 1237378.2096 131.054 4072.93 164 32.925
12.809 4959.62 1320.9 0.26633 41.0308 724223.6796 88.9765 1986.71 32 44.0039
2.456 12909.7 3619.69 0.28038 162.012 1794255.7703 221.47 4826.9 198 28.76
9.758 6237.43 1521.78 0.24397 61.9404 866387.6713 75.1184 3770.29 75 38.9633
5.769 3608.7 1319.73 0.3657 25.667 494647.3136 45.4677 1414.1 5 45.292
3.778 9413.03 3913.43 0.41574 84.2917 1301017.2572 143.301 3719.41 132 35.0492
16.434 18351.3 6636.83 0.36165 163.57 2637636.7321 256.006 6237.17 126 23.1365
4.646 5917.03 1426.39 0.24106 54.6862 773503.8488 78.7073 3091.39 31 38.8663
0.875 7010.34 2008.47 0.2865 80.4949 949628.7042 111.257 3043.49 83 39.2278
1.853 12015.8 2403.55 0.20003 149.884 1678854.3623 175.997 4629.62 148 29.5814
13.191 6175.5 2849.54 0.46142 47.5366 833551.5218 97.6827 2706.22 33 39.3895
7.726 13962.9 4989.73 0.35735 165.156 1936459.5683 216.812 4826.67 63 28.3704
13.62 7365.7 1978.62 0.26862 59.0679 1036131.9514 94.2684 2903.87 44 39.3221
13.703 7228.76 2528.79 0.34982 67.0826 1005821.854 107.808 3628.93 50 38.0732
1.478 4082.83 1274.27 0.3121 35.8334 561399.693 51.2133 1398.69 17 44.2865
5.03 7409.21 1411.8 0.19054 55.4284 980732.0199 82.8367 3129.83 53 38.6795
19.855 9723.68 3603.31 0.37057 162.853 1340410.244 241.37 4424.72 164 31.5408
5.96 13197.1 4686.69 0.35513 154.819 1842868.4563 185.217 5142.95 43 27.4319
13.339 6968.24 3150.61 0.45213 81.2383 874468.5724 137.899 2063.91 101 41.6038
2.223 10117.5 3302.58 0.32642 129.05 1353069.4419 171.483 3970.39 43 33.7568
15.015 7026.43 1912.09 0.27212 70.8954 951760.5947 98.5882 3168.23 62 38.3972
10.797 8133 3443.44 0.42339 65.4221 1183572.098 117.073 3445.03 43 37.8797
1.091 6413.8 1369.37 0.2135 54.9664 886798.1056 84.0334 2807.9 17 40.3051
4.307 14205.8 4427.39 0.31166 177.369 1963636.1473 231.956 5169.02 108 28.7983
10.531 4346.08 419.5 0.09652 39.2045 588408.7872 54.4585 2133.77 32 44.036
15.519 9607.88 2931.69 0.30513 52.3938 1307493.0756 134.287 4567.62 26 34.7962
9.216 7482.22 2009.49 0.26856 69.422 1067796.8415 104.692 3766.23 11 36.2425
3.754 8886.95 2633.4 0.29632 92.3703 1195681.1518 140.67 4060.89 42 34.8611
1.339 6608.41 2133.53 0.32285 53.2442 916507.5636 97.1699 3670.23 73 38.415
14.202 10147.6 3623.5 0.35707 81.3454 1388273.8255 130.286 4451.97 29 33.5541
8.176 6249.72 1354.22 0.21668 50.1826 897334.1296 70.7979 2325.04 63 42.4016
1.264 8706.65 2513.26 0.28865 87.7431 1202251.0664 115.651 3183.3 23 37.2337
9.304 4948.97 1417.38 0.28639 45.5408 698719.3413 68.4526 2619.67 49 43.2703
14.794 7214.73 2310.9 0.3203 63.7968 1012568.7179 95.9628 3608.72 54 39.3512
2.832 9922.14 2773.66 0.27954 113.276 1404869.3424 151.886 4234.85 54 33.5392
0.78 6805.32 1786.83 0.26256 73.8736 930684.0362 111.198 3019.92 81 39.2695
2.365 4376.95 747.41 0.17076 39.2546 577148.4164 64.4894 2562.81 11 43.5166
1.499 7264.6 2373.4 0.3267 64.8901 978120.5866 100.026 3113.19 26 40.1807
2.317 9581.64 2365.46 0.24687 103.17 1368505.0223 140.903 3892.78 36 31.103
3.148 4757.42 1301 0.27346 39.398 651297.2689 59.2486 2724 63 39.6782
6.046 8207.32 1885.09 0.22968 73.8488 1148418.0084 91.6635 3269.67 32 37.3668
18.399 11290.3 4127.65 0.36559 84.9629 1511766.9935 177.11 4451.76 32 31.8192
3.04 9041.53 3163.62 0.34989 90.4751 1292122.9066 132.966 3513.08 10 46.5464
16.514 18871.7 4790.44 0.25384 185.619 2617616.0409 222.36 5187.36 68 25.5727
13.03 8565.15 2823.75 0.32967 65.243 1204648.8698 113.459 3342.46 66 34.699
2.508 14063.4 2916.61 0.20739 163.362 1905902.8256 214.123 4851.73 94 27.8716
2.006 4202.05 744.71 0.17722 39.6896 554911.2539 59.5054 2569.43 10 41.5326
9.988 18437 6283.23 0.34079 190.257 2561741.7696 228.215 5083.87 124 27.0284
11.405 5401.22 1655.39 0.30648 48.302 747976.8636 84.193 2345 74 41.7895
2.409 6055.17 2056.89 0.33969 60.1895 851884.1644 85.7223 2693.18 41 40.6434
7.93 5448.52 1686.27 0.30949 55.0525 745541.9365 76.4563 3150.05 12 38.5684
15.229 7606.57 2359.22 0.31015 70.3133 1102020.0578 99.8765 2700.17 65 39.6167
14.674 7229.11 1889.51 0.26137 66.9965 1016196.4794 97.8967 3101.91 69 39.6611
7.983 5181.85 1540.58 0.2973 46.1167 756380.9889 69.4246 2492.75 44 42.1077
8.034 4912.71 1089.17 0.2217 51.26 706987.5942 66.5794 2152.74 59 43.1791
9.241 8272.09 1493.19 0.1805 77.4743 1117316.8145 102.072 3690.3 32 35.4698
2.091 9125.48 1932.35 0.21175 107.102 1242161.0665 135.447 4041.8 41 34.2011
2.807 9017.08 2640.87 0.29287 76.6562 1255612.9813 115.043 4306.55 61 34.3032
1.751 8634.81 2732.57 0.31645 90.8725 1216703.5517 107.116 4094.27 27 35.6903
8.953 7112.89 2639.53 0.37109 54.1795 980235.3735 110.137 3589.31 38 36.1
1.511 13313.5 3463.99 0.26018 155.329 1852923.4813 214.119 4367.6 64 31.1912
5.054 7429.73 1707.82 0.22986 78.4277 1064909.1256 108.955 3961.91 97 35.6374
2.63 8320.57 2384.79 0.28661 85.4037 1176861.8515 122.169 3890.7 37 35.1247
3.943 9145.85 2784.88 0.30449 77.7208 1261224.0083 116.614 3983.27 69 35.6478
14.479 5856.85 1609.76 0.27485 45.3865 840094.319 78.5614 2805.53 48 39.8883
16.636 7583.01 3081.31 0.40634 45.9293 1020094.8358 111.917 3221.58 41 38.2213
9.896 11571.2 4746.63 0.41021 109.563 1565281.0985 167.51 4463.23 62 33.0888
1.312 6560.4 2140.65 0.32629 54.4476 909656.1816 101.59 3600.62 71 32.6749
1.351 14783.6 3695.48 0.24997 191.94 2085686.3399 208.14 5678.98 65 23.1391
1.001 8226.06 1647.95 0.20033 70.787 1176009.7705 111.153 4057.8 101 34.8768
2.904 14685.1 3992.68 0.27188 179.879 2065334.7328 242.823 4520.51 18 29.5084
3.785 10260.3 3166.03 0.30857 90.568 1451921.7016 134.12 4246.39 98 33.3255
1.556 9808.75 3389.05 0.34551 100.201 1362761.1531 150.757 4872.97 37 32.0754
13.356 12950.5 4278 0.33033 128.475 1774485.7571 175.886 4419.85 24 34.412
2.507 17667.1 5468.21 0.30951 268.877 2391216.6601 310.658 5674.07 326 22.097
3.418 10446.1 2931.11 0.28059 117.271 1455801.5397 158.719 4368.31 65 32.9678
4.216 13033.7 3888.34 0.29832 147.368 1781246.9356 194.324 4614.63 43 29.6514
2.064 11336.2 3492.32 0.30806 112.749 1625922.4832 138.393 3909.07 65 34.6502
17.844 10029.5 3326.06 0.33162 96.2723 1352698.9728 139.325 4397.44 48 29.6421
3.13 6335.2 1919.6 0.303 57.3925 880395.7877 81.5724 2621.81 33 41.1847
2.583 11212.8 2777.66 0.24772 127.592 1612457.0748 164.934 4350.48 36 31.4385
13.56 7111.99 1657.14 0.233 67.4296 990478.1056 82.9556 2889.86 17 39.2839
0 8980.64 1680.98 0.18717 84.2585 1240737.4168 107.107 4568.48 28 32.4186
17.031 9513.91 2325.24 0.2444 101.098 1269086.3337 125.238 4144.73 30 34.1725
19.676 22649.1 5155.1 0.2276 185.035 3290765.7212 256.075 5923.27 143 25.4414
1.811 8718.57 2175.85 0.24956 84.5926 1244731.207 114.89 4007.1 6 34.1461
1.546 8491.86 2829.43 0.33319 92.3258 1201540.9391 125.66 3179.9 36 37.6508
14.106 12850.4 5175.63 0.40276 104.406 1800017.3415 193.677 4166.88 57 37.8676
4.435 17269.3 4728.78 0.27382 239.616 2369891.7346 293.284 5292.97 207 21.2863
0.979 22869.8 5440.58 0.23789 323.683 3147677.4371 405.101 6215.8 164 19.8448
3.291 9923.17 2612.15 0.26323 115.308 1409814.6167 145.683 4189.49 47 33.1126
2.729 13219.1 3914.28 0.2961 149.496 1786237.0472 190.724 4825.87 68 30.6133
2.587 9717.13 3321.67 0.34183 108.415 1357239.2857 131.557 3642.45 13 35.3428
11.2 5440.74 1685.51 0.30979 43.7013 762874.7419 70.5372 2810.19 56 42.631
18.004 12833.4 4440.12 0.34598 102.232 1766672.3484 183.625 5689.15 90 26.1461
20.685 14651.5 5027.34 0.34312 164.873 2009085.0537 205.966 4585.99 41 30.9227
12.914 6666.03 1420.97 0.21316 52.145 935272.8327 68.1992 3417.4 19 39.369
4.263 7691.12 2412.01 0.3136 89.8882 1050230.6892 124.748 3232.13 65 38.6871
4.681 17701.4 5692.15 0.32156 246.815 2403035.8631 293.028 5369.83 271 27.7825
3 4018.55 1348.29 0.33551 37.459 544487.7115 50.506 1410.11 14 44.2475
2.186 10635.3 3658.38 0.34398 126.996 1434512.9798 174.449 3942.35 52 34.0397
15.024 6835.64 2597.78 0.38003 85.0407 854847.487 157.298 3502.37 56 37.1297
1.777 10826.6 2660.29 0.24571 151.029 1532815.4712 163.273 4647.61 25 23.2898
20.148 10938.7 4759.17 0.43507 113.388 1470004.7008 207.898 4437.93 99 31.0141
18.25 20439.4 6102.12 0.29854 182.611 2946945.24 280.782 6298.83 232 22.2217
2.997 5280.59 1486.58 0.28151 50.5324 739854.5006 63.9348 2335.46 15 42.4653
2.494 19763.7 6337.84 0.32068 254.239 2688066.3712 321.635 5858.57 340 20.7747
19.736 11280.8 4488.23 0.39786 79.8575 1536346.3695 175.721 4524.85 93 31.8705
15.747 9470.42 3105.09 0.32787 108.163 1313176.4748 158.542 3972.14 86 33.0337
7.191 4832.91 1105.91 0.22882 45.1244 643321.7847 68.2999 2709.03 11 42.7736
17.69 8443.45 2508.73 0.29712 75.431 1170595.531 118.473 3297.86 45 36.884
20.103 10529.6 4451.91 0.42279 58.7131 1349721.6168 177.339 4619.74 77 33.5839
0.58 10742.2 2635.62 0.24535 125.441 1492830.9926 167.088 4701.52 172 28.7641
14.724 6774.61 1816.5 0.26813 58.7688 886840.717 91.2123 3097.29 47 39.14
2.874 8636.45 2410.48 0.2791 83.4464 1240462.0606 118.516 3980.91 42 35.187
18.148 14344.8 5586.78 0.38946 111.573 1961368.4058 228.452 4770.49 96 28.92
20.114 9331.93 3025.87 0.32424 75.6946 1270747.1458 127.99 4045.2 68 29.3951
3.178 9896.16 3558.88 0.35962 89.3136 1411319.3114 142.59 3677.39 10 34.815
1.574 10707.3 3736.51 0.34896 99.3592 1486029.3619 160.445 5916.45 46 33.7072
1.187 8212.95 1835.84 0.22352 100.371 1118714.38 118.736 3431.89 10 35.7936
4.924 7945.77 2065.57 0.25995 72.8337 1111349.6273 102.056 4083.45 15 34.274
12.165 4489.85 1236.43 0.27538 38.5931 621414.5537 56.4443 2455.68 56 42.9532
4.263 14388.5 6113.79 0.4249 193.235 1904306.4438 278.575 5505.6 197 27.1973
5.603 9933.9 3502.49 0.35257 88.523 1410788.0285 135.931 3733 65 34.546
0.484 8063.92 1959.61 0.243 101.498 1120947.4548 119.491 3223.97 4 37.1083
2.777 12559.4 4730.59 0.37665 109.31 1782823.4881 190.602 4239.78 68 32.2656
15.442 8045.98 2264.34 0.28142 65.2162 1113393.1164 98.5784 3471.15 50 36.9116
2.64 12540 3898.37 0.31087 179.077 1673197.0325 232.079 4895.48 186 28.0782
3.748 20357.1 6348.05 0.31183 252.784 2823405.2491 324.409 5554.25 106 23.352
9.741 8176.49 3307.89 0.40456 81.7761 1083623.2823 127.93 3738.05 50 35.4406
2.045 8535.59 2531.23 0.29655 92.1925 1202482.8895 116.682 3572.88 99 36.9993
2.963 9563.48 3241.59 0.33895 89.3633 1361674.0668 136.41 3575.53 11 35.4004
0 8396.52 1872.11 0.22296 76.7535 1185871.4429 110.678 3995.53 7 34.6094
18.352 13030.9 4592.21 0.3524 142.63 1798078.7409 227.448 4126.5 99 31.5512
20.003 15139.1 5322.85 0.35159 114.24 2182098.9257 214.876 5337.93 139 32.3552
12.979 7591.42 2766.33 0.3644 58.9849 1086152.6493 102.186 2845.02 68 40.4608
12.994 4172.64 1771.49 0.42454 43.2281 575017.4095 73.7737 2325.26 39 42.9021
1.898 5642.61 1353.89 0.23994 50.5733 818092.128 75.347 2864.96 56 40.2816
0.553 9225.65 2376.4 0.25758 108.324 1297303.223 158.996 3826.99 11 34.1032
2.047 9332.25 2598.07 0.27839 82.3486 1266702.5778 128.529 3874.82 24 35.0089
1.548 7490.77 1791.98 0.23922 84.4863 1040514.0329 106.137 3838.71 24 36.1715
16.599 9638.59 3150.07 0.32681 65.027 1325432.6631 134.775 4051.59 34 38.881
12.089 8022.92 2311.34 0.28809 63.7573 1113369.0344 100.528 3550.64 45 36.6809
1.801 8135.26 2361.04 0.29022 92.4233 1108056.082 119.917 3224.01 82 38.7058
17.829 11613.7 4472.35 0.38509 65.4862 1502508.3845 187.295 4116.12 77 34.2995
1.02 8672.74 3053.6 0.35209 84.3316 1161829.163 137.33 3559.4 50 35.9657
1.67 8399.72 2476.24 0.2948 92.2847 1146798.1692 122.685 3242.24 84 38.6197
1.1 9368.04 1893.21 0.20209 103.113 1323340.0573 132.266 4173.42 49 34.0532
2.769 7236.3 2439.31 0.33709 63.2004 949559.3153 121.446 2857.42 27 38.7794
2.225 6039.2 1005.27 0.16645 51.1064 839306.7589 66.5637 2977.77 22 40.2069
15.651 8720.85 2979.16 0.34161 65.741 1206635.2165 113.874 3367.37 32 39.5833
20.061 13799.5 4058.47 0.2941 148.033 1889748.631 207.323 3900.34 128 32.6903
2.036 12023.9 3242.4 0.26966 126.196 1654981.9484 170.169 4566.32 83 30.9115
2.887 9289.33 2940.67 0.31656 100.737 1285995.0647 130.084 3611.66 20 35.3066
13.6 6234.36 1642.86 0.26351 54.0029 885162.9586 84.0334 3015.42 40 39.3597
1.761 5726.46 1940.14 0.3388 68.4294 779809.6763 85.3641 3015.37 35 40.281
8.722 5431.19 1254.17 0.23091 72.1605 728073.2771 108.358 3178.45 51 39.2881
1.777 10699.8 3313.11 0.30964 130.184 1431892.0007 166.314 4104.4 37 34.0902
11.25 4017.68 1193.27 0.297 35.7434 549712.9913 50.6113 1377.23 32 44.4563
1.354 6709.61 1607.12 0.23952 70.2739 889814.8635 94.7046 3468.43 82 37.7936
3.481 6353.9 2001.61 0.31502 54.3819 838320.2494 102.544 3866.8 22 40.569
15.961 9064.29 2719.1 0.29997 94.1925 1217504.7542 127.573 3998.8 44 33.9938
9.069 6914.25 2119.79 0.30658 60.691 950958.7518 98.3783 3598.22 61 35.7457
14.042 6274.54 2578.64 0.41096 62.1599 822583.2053 120.465 2792.23 5 38.8517
12.281 8836.65 2885.77 0.32656 73.7089 1260740.3282 109.423 3423.99 44 34.2328
3.15 11196.3 3469.4 0.30987 127.498 1586015.2615 180.209 4448.41 40 31.3179
1.736 7658.23 2285.05 0.29837 76.4834 1059973.6836 95.4989 3729.23 35 36.3622
2.889 8549.77 2043.45 0.239 103.841 1200855.2607 119.17 3810.23 52 35.1555
16.532 8588.45 2738.3 0.31883 57.0891 1172521.6661 114.599 3989.71 45 35.9139
10.427 7326.68 1969.55 0.26881 61.3777 1037926.8975 83.3064 2422.6 85 40.474
1.55 7658.27 1799.31 0.23494 87.1968 1067770.0941 100.127 3842.1 23 36.1839
14.853 5853.98 1087.27 0.18573 50.5835 807671.5022 72.0055 2829.49 43 40.7246
1.676 8496.72 1716.84 0.20205 75.7389 1217727.6027 106.708 3818.55 14 35.3602
1.462 8947.77 2335.14 0.26097 96.3634 1258164.2996 128.906 4132.18 168 32.7739
1.172 9351.32 1436.5 0.15361 99.7484 1325905.7209 122.888 3950.09 45 34.9844
13.227 7357.55 2056.81 0.27955 58.3958 1055789.8185 88.3426 2571.92 29 40.1112
3.504 10691.5 2788.63 0.26082 97.2135 1512813.8783 137.366 3911.76 121 34.3168
2.313 15259.3 4712.26 0.30881 185.498 2038388.0359 262.15 5052.12 195 26.4711
16.926 7079.02 3807.73 0.53788 63.9865 952142.5907 117.32 4142.59 49 34.8536
4.967 9622.77 2890.46 0.30037 43.231 1345111.2919 104.891 4112.47 100 32.6743
15.139 13799.6 4687.3 0.33966 175.829 1959073.7376 244.406 5137.84 66 25.5359
19.344 4754.78 1931.48 0.40621 32.7632 661142.9276 72.3113 1184.83 49 44.775
1.952 6720.24 1547.54 0.23028 75.7389 885835.4041 90.183 3430.78 85 37.7361
16.999 11123.2 4306.36 0.38715 100.684 1559368.281 172.136 4273.07 65 36.0781
1.806 9739.64 2829.89 0.29055 108.47 1317133.0517 154.059 4093.75 47 33.6065
2.277 4538.01 892.85 0.19674 44.3992 618068.7854 68.1386 2581.25 12 43.0013
14.122 8042.26 3015.19 0.37491 54.7923 1152509.1156 109.229 3733.92 29 34.8394
15.308 8969.48 2765.56 0.30833 56.2736 1282412.9347 102.271 3951.85 60 38.1764
14.737 6860.49 1881.22 0.27421 66.4955 977266.2564 103.947 2878.16 33 39.267
18.334 9247.34 2661.21 0.28778 56.1217 1307357.4038 97.9506 4539.87 61 39.0957
2.883 16705.4 4373.69 0.26181 234.091 2369623.6443 265.904 5514.82 90 22.4418
5.886 5358.7 2126.45 0.39682 47.434 788274.2881 69.3869 2662.37 37 42.3161
4.111 8474.67 2704.51 0.31912 83.5966 1211672.8567 130.31 3524.76 28 37.0637
13.137 6217.64 1931.4 0.31063 54.1376 853767.8225 84.1874 2440.31 44 40.7603
5.856 15251.8 4423 0.28999 179.385 2127835.5211 220.381 5806.78 81 23.8654
2.07 11183.4 2857.35 0.25549 136.373 1546043.2878 160.063 4483.75 94 31.2457
15.537 9693.87 4506.17 0.46484 108.265 1403489.6001 176.829 4170.78 94 32.6929
16.481 11399.8 4252.17 0.373 103.473 1542835.7201 184.752 4022.64 73 34.7124
3.854 14311.2 4793.24 0.33492 154.263 2011317.6303 238.891 4663.83 73 26.0608
14.932 6552.16 1787.24 0.27277 60.9096 909876.0796 92.3011 2212.93 90 41.1098
4.288 7678.71 2996.59 0.39024 64.6707 1093979.348 102.872 4098.15 52 37.2043
2.044 11124.4 2200.93 0.19784 120.036 1505045.5214 153.447 3709.74 14 34.4691
12.308 6988.51 2948.86 0.42195 51.0705 964947.9713 125.128 2860.91 63 39.2599
2.131 5125.46 1356.91 0.26473 47.1759 712014.4756 61.2881 1978.6 14 43.4934
17.407 7196.44 2873.79 0.39933 66.8182 993553.138 93.615 3529.42 75 36.6233
2.262 8850.22 1975.68 0.22323 80.6509 1246218.4214 104.741 4707.84 27 33.1204
4.257 14217.9 4425.13 0.31123 99.8312 1959074.0757 213.303 8847.21 31 35.9257
9.978 7115.35 2137.83 0.30045 68.909 1003582.4387 96.7803 2882.88 32 39.5488
17.374 11860.3 4393 0.37039 120.966 1651349.7115 194.177 4476.16 112 46.5464
10.771 8702.91 2767.28 0.31797 77.1324 1167931.2622 120.786 3595.88 53 36.282
3.624 9630.33 3008.57 0.3124 94.069 1336131.4232 141.235 3506.99 27 36.0385
1.484 5776.26 951.34 0.16469 51.5882 816282.477 71.3577 2663.35 1 42.2454
14.29 7793.93 2560.45 0.32851 66.4502 1096374.3737 116.269 3099.34 59 35.4117
4.23 4405.99 1227.84 0.27867 36.864 618478.418 45.8457 2043.42 11 44.1846
13.807 6954.55 2132.77 0.30667 57.1288 966581.6172 105.51 3035.59 55 39.1762
3.943 6520.13 1345.98 0.20643 48.9001 940870.6881 72.1401 2418.3 73 42.0832
2.683 5104.8 1639.39 0.32114 50.0204 719759.4614 64.3347 2202.06 38 43.2267
10.848 15912.6 6480.62 0.40726 183.892 2206586.8461 294.883 4616.99 75 28.4107
18.239 8418.29 2894.32 0.34381 67.8071 1179570.5159 115.096 3780.02 19 38.3434
17.869 11452.5 3907.57 0.34119 97.4586 1572778.5393 155.657 3513.47 59 34.2134
0.895 6108.91 805.4 0.13184 48.1485 867263.5242 68.9671 2727.14 2 42.3765
4.744 7643.27 3189.07 0.41723 81.1409 1077959.9945 115.353 3218.76 39 38.0736
11.321 10109.1 4202.12 0.41567 93.052 1421603.8714 150.418 3756.68 77 34.6825
1.864 10202.1 2653.28 0.26007 91.5636 1453171.1018 137.402 3649.18 122 35.5868
1.797 12027.4 3264.93 0.27145 144.794 1710383.1757 174.24 4716.27 28 28.988
9.783 6531.39 1631.48 0.24979 56.7905 934161.2913 75.1461 3054.79 41 34.8175
20.3 19268.5 7348.16 0.38135 126.985 2748202.5157 286.186 10418.67 93 29.3758
13.393 5656.26 869.84 0.15378 69.686 793589.131 72.3516 2948.51 64 40.8501
3.005 8631.68 2607.83 0.30212 83.9794 1238413.9277 118.381 3979.72 39 34.9384
19.503 10297.2 3592.38 0.34886 96.6606 1392916.9068 162.307 3578.68 109 34.1065
10.031 6761.83 2591.74 0.38328 55.4657 934669.9149 100.811 3253.29 13 37.8784
1.889 7334.07 2044.6 0.27878 71.6123 984218.0315 109.312 3612.2 79 36.9085
7.466 16040.8 4709.41 0.29358 190.652 2194531.0761 266.622 5448.1 95 23.9761
1.35 15019.1 4632.49 0.30843 210.099 2090486.2517 254.281 5339.97 282 24.6828
15.241 7619.01 2615.89 0.34333 64.6872 1077706.3168 101.282 3757.49 61 35.1864
2.856 16353.4 4567.51 0.2793 202.094 2249940.7569 276.794 5174.2 162 25.8751
3.897 5825.73 1002.34 0.17205 52.516 802861.8042 60.3561 3036.33 24 39.7704
1.547 11184.2 3143.12 0.28103 123.633 1562343.5493 178.491 4198.34 67 32.9117
6.471 19284.3 5450.86 0.28265 247.94 2686447.1502 306.552 5452.12 228 27.1908
15.102 18197.1 7496.7 0.41197 157.265 2552698.3672 275.48 5349.63 108 25.4521
17.039 8826.91 2839.11 0.32164 110.391 1182798.3809 154.406 4434.45 91 33.6924
17.368 7318.25 3309.39 0.45221 65.4976 1044550.7558 104.478 2560.82 81 39.396
17.546 7823.82 2199.59 0.28114 64.5091 1132078.2196 91.6763 3235.23 50 40.5276
18.151 13347.8 4692.36 0.35154 151.742 1905355.725 238.395 4916.96 145 26.6722
14.311 6416.29 1542.37 0.24038 59.8776 914459.4052 77.9701 3219.01 35 40.0769
2.285 5833.08 1458.78 0.25008 44.1484 826551.8325 63.1354 2454.92 10 41.7341
16.854 8082.27 2990.13 0.36996 71.949 1153988.208 105.811 3392.65 31 38.7616
1.272 15298.5 3888.78 0.25419 181.118 2160859.0335 216.514 5696.31 66 22.9984
13.158 6387.3 1750.95 0.27412 56.229 902994.7176 79.6831 2502.86 74 42.1306
2.861 13568 4629.42 0.3412 162.897 1864656.886 206.608 4980.96 76 27.7415
2.097 6739.31 2343.56 0.34774 81.1136 928990.4906 93.8308 3252.7 62 38.5563
3.007 10700 3303.99 0.30878 133.723 1416130.0965 165.83 4136.06 39 33.888
8.58 4457.13 827.96 0.18576 40.3316 611249.2766 51.5309 2308.16 42 41.8828
4.071 10121.5 3261.51 0.32223 94.7792 1446116.411 139.082 4129.78 106 31.7817
2.536 6326 1793.97 0.28358 68.1745 907943.9029 81.5064 3076.6 14 38.0325
5.047 12664.7 3850.37 0.30402 142.444 1704121.215 187.58 4697.77 66 30.79
1.927 10721.9 3452.16 0.32197 128.541 1420548.7271 162.711 4098.37 45 33.5675
1.011 11332.5 2810.08 0.24796 129.955 1571773.9982 174.739 4683.4 176 28.7689
3.145 14077.7 4176.45 0.29667 203.933 1858199.0223 238.591 5594.82 255 23.7643
6.978 16363.1 5902.28 0.3607 183.523 2340365.9552 242.717 4935.81 58 26.4303
4.809 8435.24 2621.4 0.31076 94.8323 1147792.2162 136.658 3957.1 40 35.7148
13.667 6515.06 2816.22 0.43226 54.7587 908506.2632 97.3316 2717.9 42 40.7375
2.392 10007.8 2834.32 0.28321 122.933 1372181.1082 139.637 4201.05 131 32.8763
7.135 5646.53 1573.15 0.2786 53.6018 793315.6272 72.5804 2577.91 41 41.0569
0.545 9140.75 2290.38 0.25056 116.212 1285359.9031 154.81 3830.63 14 34.1387
7.182 6220.78 1585.1 0.2548 58.1011 876530.5139 74.7423 2497.78 63 41.6297
2.262 9875.44 2253.25 0.22816 126.418 1414851.0324 140.817 4351.77 40 32.3072
6.839 5739.99 1840.89 0.32071 40.4083 791016.4988 78.2818 2899.18 55 42.2487
1.11 5960.7 1251.77 0.21 56.9926 827432.4071 77.8647 2692.3 17 40.7155
18.555 13105.9 6130.76 0.46778 94.2418 1883661.0066 194.798 4920.1 53 34.2366
9.251 7465.01 1750.1 0.23444 76.6833 1017241.8274 94.6043 3487.44 47 36.6121
3.608 7578.26 2025.16 0.26723 68.7418 1021965.1342 103.896 3476.32 75 37.3098
7.716 5276.78 1066.58 0.20212 56.9667 749890.4735 69.8002 2341.11 71 42.6887
15.418 12070.6 4103.66 0.33997 103.591 1681855.9306 160.85 5839.56 21 38.2769
7.602 9038.09 2641.23 0.29223 64.0498 1250031.8537 122.709 4269.54 32 39.5133
14.228 5157.44 1203.05 0.23326 42.308 697393.6182 81.2012 2642.36 18 39.9338
12.145 7293.21 2151.1 0.29494 71.7369 981164.9072 104.371 3235.84 37 38.5714
4.361 13033.4 4490.32 0.34452 156.323 1813992.0195 168.64 5200.78 41 27.6078
12.226 5314.97 2048.73 0.38546 44.6088 759596.4211 86.0219 2375.17 89 41.7938
9.694 8141.89 2585.75 0.31758 93.0854 1137495.0714 111.618 3089.98 29 35.8464
3.066 12511.2 4461.6 0.3566 134.773 1739503.6936 198.325 4485.27 95 30.7489
12.484 21182.6 8976.1 0.42374 191.78 2932049.7619 416.428 12303.66 137 25.6844
2.382 12697.7 3687.6 0.29041 161.695 1765541.8702 203.207 4725.41 96 29.0862
9 15839.7 6205.22 0.39175 188.597 2109788.7058 270.498 5346.34 94 22.5388
2.562 11852.6 3783.72 0.31923 136.694 1627181.4989 181.119 4269.44 74 32.0889
4.988 7707.34 2430.5 0.31534 69.4935 1082360.9686 99.8456 3367.66 43 35.3932
3.713 5487.48 1910.51 0.34815 56.6266 759260.033 69.4206 2659.93 40 41.0447
3.719 5656.21 1752.2 0.30978 58.4543 748924.8019 86.3051 2638.39 27 41.2704
2.249 9441.23 2899.46 0.3071 90.3632 1336556.0603 134.985 3898.62 5 35.1433
2.93 9541.59 2650.72 0.2778 114.015 1364551.4725 140.984 3608.72 65 36.4515
14.608 9807.36 2707.07 0.27602 56.1197 1371750.6275 126.009 3733.92 43 35.6182
1.01 11581.1 2581.36 0.22289 155.522 1644011.3353 174.55 4587.03 53 30.0945
2.445 9710.73 2591.3 0.26684 100.373 1349463.9004 135.421 4361.38 39 33.1006
18.6 6256.98 2025.17 0.32366 49.6556 832817.2736 88.0101 2926.6 45 40.3194
19.184 23144.1 7326.59 0.31656 179.827 3246059.0686 306.583 6367.09 209 24.4186
2.485 16419.3 6224.62 0.3791 188.736 2287090.4717 259.082 4577.45 99 25.4557
13.886 11604 4168.14 0.35919 82.6117 1638433.0819 175.103 5976.27 126 32.078
14.252 8404.78 2296.59 0.27324 91.4701 1169453.1251 109.695 3313.87 59 37.6861
15.181 5483.26 1659.37 0.30262 36.0143 733968.5004 71.5323 2120.02 18 41.6319
7.428 4957.39 1341.8 0.27066 44.6187 720842.6916 61.0485 2482.17 39 42.7634
11.896 6701.17 1443.72 0.21544 66.6952 917699.7001 87.6184 3236.64 20 38.7631
7.843 8049.28 1214.91 0.15093 72.7682 1080113.722 94.2734 3777.7 21 36.213
1.938 6349.78 1338.1 0.21073 70.9563 843436.9928 91.026 3393.23 71 38.0076
1.402 15010.3 4640.89 0.30918 145.955 2136126.3986 218.351 8426.22 94 29.2748
5.831 8264.88 2278.35 0.27566 86.5523 1162664.7344 114.883 3930.74 89 33.3575
2.324 10751.5 2619.51 0.24364 126.943 1449760.5511 163.203 4107.66 83 32.1698
2.263 8305.45 2093.05 0.252 81.2724 1179825.192 103.154 3945.32 37 35.522
3.371 16561 5136.7 0.31016 192.197 2217008.2702 262.939 5395.87 186 24.6107
20.354 10402.6 4690.69 0.45091 63.4645 1467415.332 163.219 3985.98 73 35.0165
15.687 8110.48 2823.03 0.34807 70.1966 1121932.5378 111.186 3425.99 55 37.5776
5.073 16768.4 5073.99 0.30259 254.574 2282361.9576 270.378 4890.76 287 26.986
11.769 6312.84 2510.44 0.39767 59.0308 876966.6172 103.787 2387.24 55 40.0941
11.066 7582.92 2465.7 0.32516 61.0791 957441.6808 106.288 3197.22 47 39.4562
1.16 15193 3818.12 0.2513 185.126 2146284.1354 216.249 5702.45 145 23.0276
2.709 13012.5 3022.81 0.2323 174.158 1823021.5095 202.051 5002.96 193 27.9212
17.616 9936.78 3952.48 0.39776 95.7063 1403265.3265 147.27 3629.73 91 35.9874
2.919 8461.82 2100.37 0.24821 87.7084 1135403.1575 126.305 4085.3 33 35.1327
17.638 8227.98 2740.78 0.3331 90.8245 1123316.1374 148.198 3866.07 86 35.2046
8.468 5959.4 1343.74 0.22548 65.3833 834780.3558 72.5835 2772.81 74 39.639
14.652 9640.75 2941.43 0.3051 71.494 1335338.5778 123.529 3860.62 43 36.9075
1.95 8338.13 1979.44 0.23739 99.0214 1158165.0928 130.921 3537.69 34 34.8074
20.03 11592.6 3560.53 0.30713 59.8049 1604047.6567 157.844 4370.22 92 31.4948
15.412 8303.85 3099.94 0.37331 77.5138 1208330.3789 110.102 3216.59 77 37.4903
1.55 9528.23 2048.08 0.21494 101.376 1323914.1181 136.092 3707.15 27 33.7825
2.048 3761.75 974.85 0.25914 35.4169 534586.3712 42.7349 1774.02 12 44.5354
3.451 19862.4 5902.76 0.29718 247.172 2751628.0469 324.728 5530.39 85 23.3149
4.105 13460.7 4125.19 0.30646 136.126 1862245.6974 184.134 4523.59 71 29.6285
3.697 7886.96 2209.92 0.28019 91.1877 1081331.681 127.446 3813.4 31 36.5124
3.583 5432.85 1358.25 0.25 47.4066 685356.6984 75.7053 2321.77 32 42.7171
3.388 17375.4 6593.3 0.37946 187.488 2447805.8914 285.177 5607.57 157 23.3658
2.265 9385.26 2970.34 0.31648 85.3465 1325226.7922 139.534 3858.19 3 35.1007
2.558 16543.2 5087.2 0.30751 203.553 2178726.6709 270.277 6559.64 244 21.8752
14.575 7255.2 3220.48 0.44388 52.268 1018098.6762 114.526 2859.79 38 39.6328
6.79 6473.75 2709 0.41845 50.7735 903902.3876 91.2866 2384.85 6 42.4241
13.077 8417.4 1624.2 0.19295 63.3754 1194138.9624 87.3962 3028.27 38 38.9171
4.981 7110.2 1405.98 0.19774 68.2775 967868.5982 96.3984 3400.75 41 37.7263
2.119 5186.78 1119.07 0.21575 52.1829 677577.5873 79.1023 3289.51 29 40.661
8.202 8429.95 2979.24 0.35341 82.1311 1134258.6663 110.819 3862.37 67 35.0969
0.708 10844.3 2760.2 0.25453 139.007 1511193.2117 165.488 4718.73 172 28.5358
20.109 11431 4496.33 0.39334 83.3742 1580305.3081 183.874 9693.79 58 35.6751
2.232 10170.4 2942.75 0.28934 119.416 1397836.7997 149.8 4192.49 126 32.7852
4.955 6080.24 1710.81 0.28137 51.5345 848850.8338 77.22 3279.05 50 39.2999
20.239 16552.6 7244.54 0.43766 126.786 2237311.3791 283.447 5138.97 114 26.92
0.472 8467.88 2121.94 0.25058 92.7173 1182526.4151 124.631 3232.54 4 36.9507
10.824 5612.36 1631.24 0.29065 53.9757 743810.6197 78.3977 3634.15 27 40.1765
2.618 9049 3299.47 0.36462 98.3779 1201280.7014 125.932 3259.91 71 38.4956
2.298 14667.2 5194.97 0.35418 189.739 2009243.7969 261.025 4641.24 46 28.965
16.769 9908.06 4167.55 0.42062 90.0778 1396593.1022 153.508 3379.96 45 36.5174
1.229 8646.61 2118.56 0.24501 85.6835 1213906.3555 124.75 4056.2 170 33.5005
4.543 9178.11 2579.92 0.28109 56.1051 1263111.8944 128.988 3967.03 25 33.8993
2.87 9140.61 3330.34 0.36434 95.3502 1228405.1702 128.014 3420.03 71 37.7479
3.583 15554.1 4602.24 0.29588 134.109 2191062.8451 215.356 5627.74 73 30.546
19.346 15393.1 3903.56 0.25359 156.022 2171017.3029 177.346 5201.42 26 26.9924
13.684 6659.17 2644.99 0.39719 63.0637 864868.2206 107.259 3033.79 55 39.2781
2.605 18502.2 5760.33 0.31133 257.456 2533382.8887 318.05 5734.54 328 21.1574
2.519 22164.4 7614.83 0.34356 182.68 3147776.4575 362.872 17147.08 89 23.018
1.866 6956.94 1924.15 0.27657 62.7816 973042.7579 95.1835 3580.29 35 37.9278
7.612 15349.6 4848.47 0.31586 183.886 2120039.4046 263.583 5195.96 98 25.6989
15.918 8999.49 3317.16 0.36859 77.6722 1230450.2637 121.133 3522.35 15 37.6168
2.558 9211.97 2877.44 0.31235 106.619 1280889.2037 129.175 3885.18 32 33.9044
4.06 7767.83 2061.33 0.26536 68.2612 1071484.2776 100.987 3347.9 30 36.9898
2.287 11329.3 3987.39 0.35195 131.272 1516779.8816 173.172 4208.48 60 34.0585
3.714 5884.7 1146.06 0.19475 59.1233 807018.8543 70.9765 2703.11 25 40.4416
8.249 8534.16 2590.05 0.30349 75.0951 1193836.3146 119.124 4068.1 22 33.5756
4.833 12037.2 3178.38 0.26404 138.319 1723326.5587 159.134 4633.75 63 29.9053
4.911 20418.4 5889.62 0.28844 250.732 2787727.6059 311.475 5586.9 207 23.7267
17.054 5474.83 1627.44 0.29725 56.9764 713744.4064 106.777 2722.62 64 40.0618
3.976 7948.69 1652.04 0.20783 80.4701 1107096.9257 87.051 3900.86 59 37.3862
20.406 18327 6913.82 0.37724 190.76 2529972.875 295.545 6043.05 190 26.4597
16.889 10854.7 3118.15 0.28726 122.359 1561541.9174 172.03 3458.62 140 37.2447
17.357 15380.1 6297.97 0.40948 184.589 2113059.2791 273.942 5310.46 195 28.2354
2.075 12585.9 2405.05 0.19109 145.505 1775244.8705 174.689 4670.97 133 29.8721
2.343 15454.7 3511.66 0.22722 200.946 2149631.1186 239.811 5038.82 124 24.0375
1.944 5766.76 1942.85 0.3369 46.7388 811283.4194 80.9773 2500.6 26 41.7333
6.321 13750.1 4112.24 0.29906 118.789 1872059.2878 232.553 4271.01 93 29.908
17.677 16377.6 5987.35 0.36558 191.131 2255406.2416 258.312 4848.39 159 28.1317
3.131 13300.6 3977.89 0.29907 137.741 1853711.6304 177.32 4265.41 45 31.6966
14.639 7299.66 3435.72 0.47066 62.5497 1025019.8088 122.616 3072.93 61 39.6537
3.45 11887.8 3345.8 0.28144 135.928 1671310.2117 192.164 4598.73 64 30.204
0.647 4731.83 911.99 0.19273 46.175 678569.0755 54.2881 2189.58 80 42.8774
5.419 21695.9 8121.09 0.37431 163.686 3002619.295 309.469 5792.48 116 25.417
16.553 10243 4134.2 0.40361 81.5851 1391340.2527 164.394 3952.29 107 34.2962
1.726 10122.5 2725.19 0.26922 120.083 1388835.4618 169.276 4608.71 70 30.2096
5.954 5634.29 2142.44 0.38025 64.9323 735713.3376 94.1579 2716.28 34 40.7467
4.891 13681.1 4211.59 0.30784 169.101 1886418.691 223.176 4798.46 114 28.3897
13.028 5482.28 1870.73 0.34123 39.9743 745897.5078 77.2637 1970.21 13 42.4244
2.11 13754.3 3921.03 0.28507 148.07 1873165.4811 204.575 4594.74 41 29.755
3.565 7851.18 2245.57 0.28601 68.6807 1056367.9195 99.2211 3149.13 21 38.2104
12.467 7342.65 1634.33 0.22258 62.9719 980616.9203 78.6606 3490.77 25 36.9759
1.151 7368.94 2158.23 0.29288 78.0919 995213.4036 115.96 3092.37 77 39.0633
11.236 7384.59 1103.68 0.14945 65.5098 1084499.582 76.8895 2431.98 43 41.2051
17.871 8204.05 2848.86 0.34725 62.9145 1094435.8945 116.241 3320.09 45 36.5628
2.193 16308.4 4983.15 0.30555 210.578 2147067.2372 251.782 5962.06 252 21.2835
0.985 8322.55 2374.71 0.28533 101.844 1154011.2242 138.444 3179.89 5 37.3163
19.202 7951.77 3206.57 0.40325 60.6916 1061594.5596 129.413 3433.63 65 38.4098
5.769 6426.81 2198.25 0.34204 54.7308 885673.685 92.6301 3159.89 9 39.6635
11.524 15587 5503.49 0.35308 168.062 2159779.9436 253.951 5158.21 122 28.6286
2.833 15177.1 3465.02 0.2283 213.47 2086117.5408 240.638 5105.4 159 25.4112
15.897 9401.77 3691.54 0.39264 78.6343 1299563.3492 130.021 3555 23 36.9396
2.973 17462.9 5423.66 0.31058 205.583 2297925.3606 267.504 6261.04 253 21.9718
13.297 6771.87 2641.23 0.39002 77.0112 962859.5899 111.226 2930.32 153 36.5597
4.353 10146.4 2743.38 0.27037 97.1487 1432729.7936 120.225 4149.5 103 33.3428
3.091 11021.1 2927.33 0.26561 128.51 1571307.37 170.061 4415.67 51 32.3374
10.954 8349.53 2835.11 0.33955 66.7742 1165816.8075 163.847 4252.47 188 33.7672
10.687 4781.23 1346.14 0.28154 43.6269 659520.0122 72.9955 2800.88 31 41.7078
6.846 6888.81 2125.03 0.30847 52.0698 970073.5828 80.8024 3202.11 57 36.8256
14.629 8505.66 1607.82 0.18902 63.9022 1191761.5244 97.5903 3328.78 54 37.8168
2.562 3794.78 939.79 0.24765 32.4213 535229.9712 46.3792 1740.1 11 44.4482
9.408 5212.66 1187.25 0.22776 41.9342 728310.0294 67.23 2702.04 26 41.2183
1.377 3907.29 1180.13 0.30203 33.7844 535171.9516 49.0647 1394.75 17 44.3148
15.403 8804.56 3405.94 0.38683 80.7863 1206996.3007 118.932 3952.24 38 35.3119
13.542 8782.18 2851.47 0.32468 56.7188 1154049.3276 129.748 4140.08 40 41.6824
1.73 4000.26 1087.13 0.27176 33.732 569494.3892 46.039 1773.46 12 44.4875
13.858 7112.53 1836.59 0.25821 59.3027 1020780.7176 91.4044 2768.8 57 38.1572
0.545 11875.2 2206.79 0.18583 153.925 1614004.0357 192.691 4922.92 141 30.0154
4.247 12162.1 4093.52 0.33658 145.506 1698186.4334 172.114 5105.18 36 27.3166
14.573 10900.1 3163.52 0.29022 97.686 1484882.286 138.654 6291.35 37 30.3835
4.649 7731.63 2352.12 0.30422 71.1955 1076540.8033 102.124 3176.19 38 37.2213
17.298 8005.01 2212.72 0.27641 68.133 1141755.3419 97.4371 2972.64 37 39.1094
3.799 12140.1 3674.36 0.30266 167.098 1713117.7842 208.464 4843.43 70 28.2131
9.511 8977.07 2539.92 0.28293 73.2042 1265352.3854 121.11 4154.85 19 33.7762
0 11954.3 3301.06 0.27613 115.286 1670648.7125 162.583 5588.31 47 26.6845
13.367 8369.15 2592.21 0.30973 64.6674 1180820.4241 102.395 2794.74 58 39.7038
3.665 12485.4 4686.63 0.37536 145.633 1683532.4121 241.38 5107.97 75 27.0774
2.258 11850.9 2837.26 0.23941 148.885 1615402.3458 175.391 4450.58 19 30.3571
13.474 9705.52 2209.78 0.22768 97.1801 1333734.5476 122.191 4866.92 47 29.1786
15.686 9772.43 4303.41 0.44036 94.8303 1364590.2971 154.642 3528.82 63 33.6481
9.525 10113.9 3119.92 0.30847 117.155 1354310.022 191.414 3747.64 90 34.3699
3.99 8528.96 3039.48 0.35637 97.2045 1201804.9194 131.41 3675.95 35 35.1897
5.259 10553 3184.68 0.30177 102.184 1473822.4168 154.449 4598.46 45 34.1185
12.486 6948.62 1580.92 0.22751 52.5896 968396.8598 85.487 3109.58 20 39.4263
1.78 9231.18 2844.32 0.30812 89.9883 1302786.6351 115.685 4534.44 48 33.3832
11.289 6106.08 1487.54 0.24361 66.4389 760379.0568 91.1326 2898.86 28 38.9326
0.832 7039.42 2048.79 0.29104 77.4522 968337.8248 112.37 3070.25 75 39.0351
1.226 8721.2 2451.89 0.28114 99.4435 1208142.1843 145.212 3262.04 17 36.3615
4.658 12566.3 4553.24 0.36233 139.979 1748284.8277 187.998 4470.62 50 30.9425
1.415 15728.7 2906.59 0.18479 176.403 2181870.3618 217.664 4751.49 36 28.3109
9.048 15002.5 5033.91 0.33553 96.6897 2082058.0573 222.602 15244.7 61 31.7999
13.972 10731.9 3581.04 0.33368 98.5697 1431603.7139 155.857 4564.94 45 31.1429
17.294 8791.92 2528.32 0.28757 77.5369 1228130.7192 109.975 4322.21 61 39.1269
13.358 9227.86 3582.5 0.38822 83.257 1286803.4047 128.214 4181.31 40 35.8033
7.416 5534.69 1475.41 0.26657 56.8006 730655.8671 83.4518 3500.51 34 39.7599
2.165 15764.8 3503.65 0.22224 167.719 2202946.4286 225.176 4913.37 79 27.5506
13.875 8103.83 1576.99 0.19459 71.864 1136109.6385 91.0121 3189.41 46 38.7648
15.673 8537.71 2493.5 0.29205 89.7387 1206210.885 130.266 4457.48 100 33.0205
13.572 7188.9 2193.28 0.30509 68.7632 1015271.5114 99.9261 3608.14 66 37.3265
2.648 11047.1 3249.38 0.29413 135.203 1582655.6852 176.496 4449.36 42 32.2973
15.252 8464.77 3828.64 0.4523 95.8491 1207356.281 135.198 3178.97 67 29.7794
18.154 14868.5 5477.53 0.36839 138.805 2127371.6665 201.638 5323.2 81 25.441
16.391 9255.61 2926.94 0.31623 76.8346 1264832.5006 123.855 3819.7 97 33.9679
15.361 6568.37 2535.58 0.38602 61.0571 866590.1481 115.479 2427.74 44 40.3456
6.15 17808.6 7236.46 0.40634 203.672 2500052.3301 287.159 5134.14 133 26.1533
3.185 15920.7 5235.62 0.32885 194.028 2120285.4116 256.674 5298.37 226 24.9502
12.264 8264.21 2828.19 0.34222 94.6972 1172818.2954 107.213 3528.24 40 36.8657
8.777 6066.72 1488.64 0.24537 69.4933 841556.0672 77.5638 2830.7 78 39.5132
1.849 8174.08 2388.28 0.29217 85.8253 1140775.6994 106.215 4062.34 31 35.4926
12.349 7482.83 1936.29 0.25876 58.5171 1057606.3577 90.8466 2736.71 13 39.5467
2.665 19592.2 6045.56 0.30856 261.116 2650540.705 318.36 5703.54 323 21.4701
2.734 9729.2 3223.95 0.33136 106.577 1372435.2287 125.292 3690.63 16 35.3971
18.22 13449.6 6238.96 0.46387 178.161 1878627.3919 262.413 5119.38 139 26.7185
2.179 8858.21 2951.26 0.33316 91.3048 1262450.0398 106.875 4208.33 19 34.4761
19.07 16513.9 6114.79 0.37028 200.31 2273559.7777 275.583 5542.8 193 20.7274
2.443 8424.73 2921.88 0.34682 93.1914 1191777.1445 122.754 3206.75 25 37.5499
1.38 8768.71 1863.39 0.2125 81.5204 1263344.7808 99.6288 3943.8 11 35.2024
20.754 8498.07 2399.4 0.28234 94.6018 1165721.8763 97.4976 4350.57 27 30.7924
1.197 8430.6 2692.97 0.31942 100.776 1155826.0206 146.996 3251.89 13 36.7026
9.424 6311.92 1890.18 0.29946 65.2446 863046.3412 103.877 3438.75 41 37.5186
17.044 15661.7 5066.61 0.3235 165.488 2264389.3983 211.248 6349.98 152 25.1452
17.958 9321.65 2959 0.31743 87.4061 1305148.1433 134.557 3508.99 104 36.2376
13.819 11016.8 4151.86 0.37686 96.3486 1560947.5107 163.391 5521.09 88 32.1833
18.394 7609.43 2673.34 0.35131 85.4899 1053712.0035 146.385 3529.7 81 30.8405
19.582 12688.9 4656.96 0.36701 62.7578 1765702.3536 179.811 5642.51 89 25.9166
3.285 20092.8 5935.08 0.29538 244.933 2784665.5385 326.865 5533.54 82 23.3408
1.174 6705.56 2114.33 0.3153 55.2646 933407.9212 97.6898 3705.07 76 36.7513
2.202 9972.79 2748.3 0.27557 118.04 1372701.4175 142.156 4169.07 114 32.8103
8.914 9060.65 2325.77 0.25668 83.5354 1283605.2571 116.813 4046.19 68 33.6373
13.338 9869.49 3354.94 0.33993 75.6856 1394851.3806 139.107 3786.63 18 35.3782
1.437 8978.93 2270.27 0.25284 84.7382 1285875.556 119.776 4035.88 5 33.8986
14.564 6533.12 2149.74 0.32905 62.5054 885501.3834 98.9046 2421.63 40 39.9791
2.913 14946.8 4421.83 0.29583 172.507 2056386.8796 259.368 4890.79 35 28.197
3.093 23320.4 7967.19 0.34164 265.084 3125131.0125 379.596 6506.12 305 21.0851
2.324 9356.16 2264.41 0.24202 107.926 1272182.7427 141.039 4037.36 41 33.9122
2.448 3852.5 967.27 0.25107 32.5402 546465.3659 46.2995 1779.59 8 44.5123
17.105 12186.1 4398.82 0.36097 106.883 1644190.9548 173.96 4978.24 67 30.3447
1.916 7412.58 2591.35 0.34958 75.9412 1035668.1133 94.1101 3732.34 29 36.3296
1.937 9023 2653.29 0.29405 89.2362 1220710.9931 123.045 3811.4 33 34.888
1.318 5732.45 1037.29 0.18095 50.492 824078.5788 72.5545 2845.98 58 40.1983
4.105 13073.9 3736.01 0.28576 148.053 1749706.3151 198.116 4738.3 55 31.0701
3.586 14921.7 4969.92 0.33306 159.293 2075180.2209 231.858 4770.17 77 28.3174
3.88 19684.3 6687.43 0.33973 257.243 2734433.3006 328.036 5447.83 92 23.8391
1.659 6141.89 1575.31 0.25648 55.8634 848657.4248 83.3776 2760.65 19 39.6417
1.523 14412.9 3544.92 0.24595 181.106 2027073.9799 202.762 4072.8 136 32.0174
1.612 5561.86 1078.02 0.19382 51.1426 792278.9229 72.9365 2880.49 58 40.2227
2.259 9467.31 2684.41 0.28354 87.7849 1325344.7563 133.266 4132.21 2 35.1323
2.657 7700.68 2293.53 0.29783 81.9618 1073757.8442 119.611 3867.26 48 35.3241
2.452 15632.1 4590.19 0.29363 209.32 2053927.817 242.206 6262.29 256 21.6865
13.903 22781.6 7186.99 0.31547 196.959 3279117.3243 346.423 6516.31 269 19.1526
7.117 11484.4 3826.63 0.3332 128.662 1610781.3562 160.903 4725.4 74 30.093
3.702 11787.5 3373.15 0.28616 133.707 1681012.1106 160.803 4499.77 59 31.409
1.283 8036.29 1938.98 0.24127 78.7386 1153830.3068 113.295 4041.3 102 34.9956
4.02 5686.6 1559.2 0.27418 63.0926 714907.2063 88.5745 2964.57 24 39.8677
2.499 13572.5 3522.46 0.25952 134.566 1893792.0742 161.54 4863.75 82 30.6188
11.904 3902.86 1350.08 0.34592 36.3014 538389.6954 49.8276 1382.57 26 44.4159
4.713 16428.6 4040.56 0.24594 177.379 2317426.1072 245.297 5084.33 99 25.9206
1.416 14867.6 2975.15 0.2001 189.027 2076958.5405 219.827 4691.42 30 28.5786
5.18 8526.79 2635.13 0.30904 90.3526 1151873.3883 133.054 3944.9 43 35.6839
3.387 11592.7 2953.79 0.25479 152.84 1623511.9455 149.474 4065.32 133 46.5464
1.578 10310.6 2638.74 0.25592 120.214 1421957.7855 169.389 4711.95 75 27.401
14.726 15624.1 5143.38 0.32919 204.949 2087004.0374 274.221 5393.13 228 27.0938
11.001 9476.27 4067.38 0.42921 82.2447 1267261.7066 150.864 3992.93 61 34.4386
18.407 21218.6 7438.94 0.35058 196.783 2822427.2217 299.913 5649.48 154 22.5436
13.543 9536.29 4452.93 0.46694 71.395 1300050.516 155.679 3277.52 41 37.9814
2.997 15039.6 3892.28 0.2588 199.911 2068699.1762 260.024 5056 168 25.1132
3.063 6784.8 2032.74 0.2996 64.0407 917312.9699 91.1672 3230.7 39 39.8773
2.13 9025.86 1940.7 0.21501 101.217 1246244.2225 137.51 3648.26 18 34.6675
3.311 7316.3 1591.08 0.21747 63.4707 1002888.1277 98.37 3516.18 29 38.231
3.515 7870.91 2158.72 0.27426 67.2952 1045053.6226 99.0195 3122.78 25 38.4217
2.93 9537.13 2719.99 0.2852 107.349 1335166.3067 155.097 4128.38 49 34.0533
3.302 20734.4 7997.71 0.38572 189.396 2876946.082 356.061 16359.07 156 22.6971
3.565 9115.54 2838.96 0.31144 89.4582 1306127.8111 124.933 3825.66 5 31.7797
4.016 19941.7 6333.94 0.31762 249.742 2759410.9951 319.383 5541.26 77 23.0509
18.284 5888.66 1286.65 0.21849 56.9445 774561.6647 71.4025 2945.17 29 40.9305
1.788 10333.8 1488.94 0.14408 144.709 1445257.8793 157.221 4601.91 140 29.8902
1.272 6816.93 2442.88 0.35835 76.1591 930202.2478 99.0812 3261.21 57 38.8708
16.819 18982.5 5910.91 0.31138 179.95 2688475.9337 245.378 6764.2 63 21.0489
2.144 8426.32 1898.83 0.22534 94.3127 1173859.1174 116.515 4162.74 43 34.3654
2.807 9017.08 2640.87 0.29287 76.6562 1255612.9813 115.043 4306.55 61 33.976
3.382 10072.1 2443.81 0.24263 95.638 1422496.8525 132.188 3851.38 127 35.8509
14.587 6463.8 2057.06 0.31824 63.7041 862876.3623 111.113 3341.83 59 37.8193
2.306 12321.4 4471.98 0.36294 105.24 1734583.9595 175.491 4535.62 16 31.4643
2.062 8690.19 2436.2 0.28033 91.0912 1171515.9537 114.398 3752.59 34 35.404
13.47 6543.48 2827.74 0.43214 75.9583 811859.4046 134.515 2065.43 92 41.5978
17.214 12225.2 2580.13 0.21105 128.993 1680539.731 159.718 3948.94 26 33.4175
13.288 5584.36 1687.52 0.30218 50.2967 778339.4572 85.711 2769.57 18 37.7726
9.834 8490.11 1746.51 0.20571 92.4787 1194853.811 111.603 3933.19 101 35.5434
2.575 9134.42 3184.35 0.3486 102.895 1225431.3182 129.48 3377.53 75 38.0164
3.126 5259.86 1807.31 0.3436 54.0899 730094.3077 73.0096 2526.8 28 41.5705
10.084 4582.01 901.76 0.1968 38.2 651616.1671 49.6453 1717.22 53 44.608
15.175 10039.9 3579.42 0.35651 93.3141 1428993.7265 140.052 4078.47 97 33.4436
20.42 18035 7851.91 0.43537 134.218 2445253.6888 278.493 6267.78 114 24.6631
1.834 6841.84 1806.77 0.26407 66.151 926900.8808 92.7842 2960 17 39.1523
4.835 9772.26 2891.14 0.29585 94.3971 1379422.8347 127.621 4142.77 106 33.4773
3.428 12121.2 3097.61 0.25555 150.006 1710148.6496 194.158 4721.56 59 29.0767
11.21 7708.33 2360.84 0.30627 72.756 1057631.7966 107.34 3104.74 53 37.9621
8.052 7199.18 2405.06 0.33407 52.8504 975577.0528 101.323 2781.63 40 40.4899
13.656 9151.27 2900.64 0.31696 86.1895 1259985.799 129.404 3620.64 42 36.5321
10.284 8000.45 2973.33 0.37164 80.7645 1116450.2423 114.267 3760.36 53 35.6669
3.198 10328.2 2794.05 0.27052 136.383 1396071.0385 137.736 3887.06 130 32.9402
2.638 8306.66 3024.22 0.36407 83.6331 1140469.4411 120.353 3852.2 24 36.0791
1.501 14866 3002.39 0.20196 183.837 2062582.454 229.114 4721.26 24 25.6749
1.139 13761.2 3971.29 0.28858 185.028 1915690.7364 218.576 5535.02 139 19.6774
2.054 9548.18 2864.02 0.29995 102.442 1321869.0699 140.114 3465.61 123 33.3283
10.81 12063.5 3441.61 0.28529 112.302 1735835.2761 171.556 3833.32 143 35.6971
20.123 15689.3 5462.48 0.34816 153.933 2150470.3954 252.979 8490.08 31 33.1384
2.71 3349.89 1030.51 0.30762 24.3875 457690.3496 33.5225 1394.71 1 45.4079
2.791 13363.2 3332.85 0.2494 140.314 1815301.7074 164.553 4007.12 208 32.2176
2.163 13462.5 3781.02 0.28085 149.774 1829682.5277 199.32 4615.35 30 29.7787
4.652 9419.59 2924.73 0.31049 60.6301 1292113.9113 139.552 3992.74 25 33.8318
3.476 9436.99 4498.36 0.47667 87.9869 1314080.5546 155.815 4314.77 94 32.481
17.184 8907.24 3384.01 0.37991 82.4089 1219451.3741 146.422 3494.7 93 36.1088
2.337 9502.14 3425 0.36044 101.003 1338975.9314 136.419 3653.9 13 35.1578
1.437 15019.8 3816.77 0.25411 176.666 2122149.8182 213.917 5689.69 67 23.015
3.426 15980 4187.88 0.26207 214.335 2215390.3446 252.396 5176.62 160 25.2922
7.156 5446.58 1498.34 0.27509 34.1229 746863.8687 69.9627 2102.9 16 42.6393
1.664 5795.01 1743.8 0.30091 71.1473 810872.5016 84.8449 3042.38 34 40.2244
14.401 8398.39 4269.42 0.50836 86.376 1045731.8814 174.416 2596.45 85 39.5156
2.569 12754.6 3523.76 0.27627 149.471 1782702.1657 214.67 4884.4 203 27.7262
5.344 10942.4 3688.86 0.33711 97.9169 1528418.4031 143.901 3609.63 23 35.3867
6.628 11513 2505.49 0.21762 124.533 1616131.0973 155.325 4559.58 51 30.5639
16.319 9154.05 2016.83 0.22032 108.509 1266784.7611 127.944 4028.23 80 35.0234
10.772 4424.1 1022.65 0.23115 45.8909 550865.2265 67.6236 1851.73 39 43.4873
4.205 23413.6 7417.76 0.31681 310.891 3231915.3651 382.665 6364.46 119 17.4526
1.046 11167.1 2944.24 0.26365 143.865 1550308.2494 180.594 4642.16 166 28.4243
1.957 15911 5100.22 0.32054 198.253 2208083.4909 237.168 5373.12 170 24.2065
4.415 5002 733.94 0.14672 45.2173 625698.4891 65.845 1975.85 35 43.4667
16.033 7387.99 2828.86 0.38289 76.5562 991376.7828 119.157 3515.79 57 36.5767
14.843 4103.29 1602.21 0.39046 26.1419 563351.8147 53.0686 2249.11 6 45.4214
1.337 6397.79 1662.08 0.25978 71.3599 840593.3974 90.9084 3435.86 76 37.9354
8.486 4612.55 1439.99 0.31218 40.8724 620274.7921 59.8228 1488.49 16 43.967
4.977 7188.29 2261.99 0.31467 70.2348 976867.9819 96.1204 2978.66 101 38.4894
2.437 8396.66 2272.97 0.27069 86.9098 1188057.2047 120.149 3312.63 5 37.6525
9.455 18049.2 5831.99 0.32311 190.37 2562022.1143 262.587 5187.19 47 25.1876
1.071 14864.6 4369.04 0.29392 190.258 2068290.3975 224.034 5676.28 135 22.8175
15.706 8343.98 1971.68 0.23629 88.5282 1174434.0273 123.628 4123.24 89 34.2247
3.027 18225.3 6219.74 0.34126 206.405 2484797.5599 285.946 4965.53 54 24.2254
19.375 9012.94 3601.56 0.39959 110.512 1242478.6218 174.797 3697.33 133 34.7559
4.078 10603.6 3639.86 0.34326 69.3135 1436461.8917 149.469 3707.88 44 35.2617
5.014 8493.88 2809.98 0.33082 67.8854 1122195.7501 123.217 4879.11 69 32.2589
11.222 8569.86 3198.24 0.37319 74.8826 1169048.6291 116.638 3878.33 14 35.973
15.01 9716.89 3345.87 0.34433 93.7844 1390022.1616 148.442 3682.02 94 34.5174
11.992 4917.7 1198.51 0.24371 37.683 673259.0686 60.2082 1948.06 7 46.5464
13.896 7875.5 2231.41 0.28333 72.7881 1114788.8268 104.217 3283.91 57 38.0837
5.736 14938.1 4745.59 0.31768 177.754 2100264.0151 240.508 4642.3 36 28.3221
3.459 8981.37 2662.35 0.29643 103.255 1240022.8874 123.021 3885.18 25 34.0082
15.005 7484.15 2114.45 0.28252 54.7688 1070693.9394 85.7881 3497.87 57 37.951
2.57 16970.3 4759.88 0.28048 210.908 2346247.8278 289.384 5192.4 178 24.983
3.887 5413.14 2130.82 0.39363 48.8476 748915.861 80.4418 2256.77 26 42.0474
16.129 7669.06 2767 0.3608 64.4557 1074638.1505 109.992 3373.09 45 38.1294
17.943 18489.2 5202.07 0.28135 182.543 2613281.0617 222.299 5694.46 56 23.8024
1.507 9605.62 2857.79 0.29751 86.0884 1375008.5055 128.398 4165.52 12 33.2494
4.955 6594.64 1546.87 0.23456 57.1282 878684.6983 80.31 3134.24 30 38.0584
5.578 14863.6 5605.46 0.37712 200.273 1980156.0473 259.149 5166.57 73 27.014
17.266 7614.05 2436.86 0.32004 64.9103 1048276.5217 110.057 4198.52 65 34.9589
18.713 10169.9 1985.34 0.19521 95.7779 1428321.6353 121.754 3999.94 59 33.3032
7.859 6209.31 1944.12 0.31309 63.2861 822112.8598 92.6329 3099.84 63 39.9527
7.798 6091.67 2166.43 0.35563 63.896 828661.0361 93.0652 3258.43 38 38.1792
12.312 4837.79 1327.49 0.2744 40.9513 667402.3639 67.7433 1493.47 14 43.2594
5.519 6902.59 1593.07 0.23079 96.8011 956098.7228 88.5974 2997.75 20 38.2608
13.371 11199 4207.62 0.37571 92.7453 1560642.6607 150.704 4303.54 120 32.129
10.224 4442.87 1385.53 0.31185 41.4677 604094.3951 63.235 1459.56 7 44.2817
1.738 9534.87 2408.29 0.25257 77.0124 1369899.8715 116.949 4653.62 92 32.3665
12.979 8881.27 2534.52 0.28537 72.1369 1256489.9152 113.945 3370.24 54 37.3396
5.271 6805.47 1339.23 0.19678 64.767 921816.1777 74.472 3329.51 55 38.8695
2.648 15635.7 4879.36 0.31206 223.55 2058426.3009 248.881 5952.53 240 22.0253
0.87 14991.7 4384.97 0.29249 195.305 2084877.0098 222.425 5619.36 141 22.754
5.955 7805.39 2583.5 0.33098 65.455 1042743.9452 120.635 4021.8 58 36.2345
2.252 12201.8 3054.28 0.25031 120.716 1666076.0962 160.521 3944.45 225 32.5965
2.225 11307.9 3751.39 0.33174 129.107 1585217.8286 174.119 4206.95 40 30.8552
17.153 21800.1 8823.9 0.40476 190.842 3056260.2141 382.516 14403.34 143 25.7968
4.021 6298.25 1464.32 0.23249 60.5912 869490.5625 77.5625 3163.34 26 38.3074
4.34 9770.83 2223.04 0.22751 121.378 1381356.2625 127.285 3793.67 62 35.128
3.075 14638.1 4428.72 0.30254 171.48 2026558.6403 245.471 4866.72 22 28.116
12.958 6639.09 1833.4 0.27615 64.9371 908469.9094 83.88 3413.07 82 39.2161
1.459 5389.08 1161.68 0.21556 52.0487 775574.5737 69.827 2868.53 59 40.3509
9.734 6792.65 2668.33 0.39282 56.9178 934109.5174 103.324 3723.01 23 39.4405
6.147 18898.1 6151.19 0.32549 142.305 2581429.9797 252.993 7048.63 98 31.7842
3.718 19617.7 6467.48 0.32967 139.433 2686272.6535 272.7 5866.39 187 22.2207
15.759 9741.86 2927.9 0.30054 96.3519 1319721.349 103.383 4784.71 14 34.957
3.443 13073.9 3736.01 0.28576 148.053 1749706.3151 198.116 4738.3 55 29.98
3.086 14850.6 3555.8 0.23943 177.851 2131988.2198 218.899 4921.43 79 27.7152
3.139 8801.26 2692.18 0.30588 79.9083 1227456.3713 112.187 4344.84 62 34.0203
3.658 16210.2 3874.39 0.239 179.71 2135575.5312 246.224 5089.52 152 26.4078
11.439 9853.3 2942.29 0.2986 73.1983 1374878.6594 123.697 4513.93 19 34.4105
4.738 7855.12 2350.14 0.29918 82.1692 1065326.4346 101.284 3613.17 12 36.7844
4.833 23028.3 7399.03 0.3213 255.474 3095804.9153 257.682 5334.71 253 24.549
3.208 8513.14 2564.98 0.30129 111.292 1161659.4401 154.812 4009.23 101 32.7797
18.748 13919 5068.06 0.36411 188.091 1963711.0626 234.898 5312.4 178 27.1235
2.466 17332.7 4983.65 0.28752 227.774 2409078.8882 282.981 5727.28 198 21.8532
3.747 9649.03 2291.76 0.23751 86.3962 1365355.4734 110.118 4779.12 30 32.7941
12.849 6729.02 2781.1 0.41329 63.2249 985861.5456 97.5235 3060.92 28 39.3233
3.941 5423.68 1366.54 0.25195 48.6014 687646.5248 77.2487 2317.9 24 42.5998
2.006 5933.96 1696.4 0.28587 46.1302 826609.6675 78.3229 3062.63 15 41.4051
1.429 10502.4 4541.84 0.43245 84.9421 1479424.4314 169.112 4512.42 93 32.714
1.001 10780.8 2503.14 0.23218 152.61 1514721.6258 184.126 4603.68 50 29.9339
2.275 9149.38 2705.8 0.29573 102.744 1268698.7715 124.191 3905.5 20 33.8987
2.01 8757.7 2486.06 0.28387 77.4158 1222507.4216 109.393 4181.74 63 34.3706
3.38 5694.01 2153.82 0.37826 54.1455 782274.9674 80.9787 2686.73 22 40.5869
1.884 18988.5 4227.33 0.22262 220.099 2670973.4325 280.926 5570.51 94 23.5732
7.568 9217.19 3132.22 0.33982 78.205 1254230.2364 122.467 3858.95 94 34.7425
3.299 21286.2 6536.43 0.30707 245.894 2966734.4673 318.957 5587.36 73 23.1025
20.786 15684.2 6953.18 0.44332 195.893 2059031.1429 297.037 5640.01 134 23.2813
2.204 16787.4 4730.44 0.28178 230.773 2324111.2231 267.578 5686.81 198 22.1472
1.793 5194.34 994.32 0.19142 48.9593 741346.6662 67.4161 2919.89 55 40.0471
1.277 5269.2 2136.25 0.40542 33.6548 746862.7804 71.2094 2440.42 38 42.7156
9.612 7363.69 2199.16 0.29864 65.8176 1016565.2649 99.0617 3431.7 34 37.6492
12.466 6143.83 1574.51 0.25627 65.1444 856171.6639 108.703 2789.53 83 41.7136
3.018 13956.1 4978.61 0.35673 163.391 2047986.6589 263.32 4857.75 84 26.0054
2.012 7020.81 2044.64 0.29122 61.5261 976360.2624 91.7073 3065.94 88 38.1758
1.307 6647.61 2238.09 0.33667 62.8886 898026.8466 97.6123 3060.9 21 40.4059
9.047 7801.4 2875.13 0.36854 54.4519 1042579.7542 121.6 3129.72 39 41.1653
3.279 13770.6 4578.43 0.33247 136.535 1930475.8527 194.546 4340.83 36 31.4138
15.402 6717.47 3507.65 0.52216 73.7372 895637.8159 135.631 2845.73 55 39.4369
3.793 10398.4 2559.26 0.24612 116.571 1467417.6422 150.775 4325.37 62 33.2667
6.675 14148.3 4094.81 0.28942 114.791 1935193.4719 237.366 4252.78 93 31.1352
1.95 8675.11 2291.08 0.26409 90.9649 1183234.7991 121.088 3222.84 71 38.6689
14.151 5884.37 1352.71 0.22988 59.8309 789677.9146 87.4651 2857.44 61 40.6999
2.217 9933.38 2847.7 0.28667 99.4328 1360199.9357 145.293 3871.26 119 32.9638
19.816 12645.4 4890.81 0.38676 85.4388 1794347.1335 190.079 4698.32 78 31.4164
16.201 8075.29 3374.16 0.41783 52.8517 1120041.8915 138.951 3065.73 72 38.7229
1.886 9781.66 2780.14 0.28421 89.8147 1377222.8607 123.767 4625.65 51 33.334
18.041 11153 2947.39 0.26426 102.318 1524221.6682 130.984 4081.9 14 34.8645
16.502 7749.39 2231.2 0.28791 85.0234 1025985.8248 112.391 3270.33 21 46.5464
2.167 8292.79 2401.25 0.28955 96.3881 1174552.1755 112.687 3558.21 93 36.7574
13.5 7201.07 1721.37 0.23904 59.2554 980710.269 95.848 3472.01 35 37.3488
2.299 6143.24 1531.13 0.24923 54.7989 858181.3321 70.9963 3362.2 58 38.8321
16.695 12280.7 4492.18 0.36579 132.437 1757039.2951 185.199 5128.21 125 27.1657
17.868 15509.3 5775.23 0.37237 113.379 2214214.2982 245.126 4089.69 96 33.949
7.081 6997.5 2161 0.30882 61.6332 992216.0467 90.0566 3937.39 46 34.8783
13.365 8643.26 2371.78 0.2744 58.7999 1228272.5481 93.9961 3430.26 71 38.2306
15.828 7389.74 1701.22 0.23021 63.6264 1046126.4351 84.5514 3056.34 32 38.8708
14.326 7792.25 1785.71 0.22916 96.3778 1072706.1472 112.202 4009.65 80 34.9069
14.808 4690.2 1083.15 0.23093 42.6451 639824.0449 69.0055 2571.9 21 41.3866
2.02 9581.08 2213.3 0.231 106.492 1316684.4671 145.681 4006.3 37 34.0777
2.674 10812 2772.54 0.25643 132.273 1514717.8296 160.343 4328.94 40 32.4133
13.555 8092.24 2265.07 0.2799 96.9022 1086862.2961 101.171 3394.49 42 35.6469
11.276 8953.79 2487.05 0.27776 63.5098 1237752.0086 120.829 3905.54 37 36.1962
1.989 8996.39 2469.34 0.27448 95.2215 1224381.821 124.52 3248.33 80 38.5264
14.481 7981.35 2972.98 0.37249 65.0336 1137804.217 115.136 3492.74 21 39.0693
10.129 7960.51 3102.87 0.38978 90.3082 1071434.1969 153.75 3674.94 63 35.6234
9.433 11637.2 4163.38 0.35776 80.0733 1644329.8668 160.432 4327.15 80 34.2839
3.694 9166.37 3902.35 0.42572 85.0753 1281525.0417 141.618 3732.06 111 34.8975
0.889 10789 2892.84 0.26812 137.63 1494757.3759 171.969 4693.28 173 28.8194
2.963 9984.78 2744.91 0.2749 116.786 1401256.4984 150.102 4153.08 45 33.1112
18.714 12132.6 5146.19 0.42416 141.046 1717361.0121 193.523 4669.77 132 30.4317
16.231 7725.48 2546.72 0.32965 74.6927 1075573.554 97.4814 3031.49 22 38.53
3.464 14502.5 4097.21 0.28251 129.669 2023978.7617 193.931 4740.16 77 29.548
13.994 5839.06 1111.72 0.19039 56.1744 803807.5809 79.3453 2369.68 17 41.0367
6.488 5457.99 1051.33 0.19262 49.845 752027.227 68.6438 2239.61 34 42.4366
11.284 5814.97 1671.47 0.28744 60.5789 783650.9901 83.9968 3237.27 43 39.2493
11.164 8030.18 2668.96 0.33236 57.6302 1092054.7992 119.535 3482.52 28 38.5295
14.189 18476.2 5008.56 0.27108 178.739 2608080.0362 230.834 5739.89 64 23.0575
3.451 5692.31 982.12 0.17253 60.8543 765421.1219 79.6769 3125.15 48 39.4738
14.433 11871 4894.15 0.41227 116.442 1609505.366 193.225 4626.01 96 29.5313
0.938 11289.3 2543.23 0.22527 153.93 1595596.8307 178.049 4597.71 54 30.0359
3.695 16044.4 4559.61 0.28418 149.372 2260626.7602 178.961 5206.39 65 27.5809
3.401 13381.6 3803.58 0.28423 147.031 1814078.2419 207.669 4728.36 32 29.2116
1.224 7957.3 1746.4 0.21947 96.3938 1073853.363 122.734 3370.01 10 37.4955
3.218 9880.66 2933.93 0.29693 112.084 1392923.0708 156.049 4209.5 58 33.575
2.898 7758.34 2187.88 0.282 81.6881 1104826.1864 105.635 3915.24 37 33.6399
3.887 11946.4 4454.11 0.37284 130.334 1671544.8422 199.801 4205.34 55 32.3266
18.244 10954.8 4067.09 0.37126 97.6749 1504771.8524 172.742 3841.74 97 34.705
2.324 9536.63 3555 0.37277 105.086 1345347.366 136.918 3634.63 10 35.3592
10.746 10809.3 4407.26 0.40772 91.4208 1548890.8123 144.384 3919.47 83 36.4935
1.427 6032.67 1902.11 0.3153 55.6193 835937.4172 90.5902 2732.15 39 40.2197
12.897 7955.53 2364.81 0.29725 64.6848 1132268.7701 97.3995 4044.82 57 39.534
4.045 10024.7 3084.56 0.30769 90.4847 1430522.7089 128.604 4177.4 106 32.7141
7.308 8302.88 1622.9 0.19546 64.1801 1169525.1437 88.7541 2843.55 30 46.5464
20.135 15823.9 4577.37 0.28926 183.13 2182617.8917 249.698 5480.99 148 25.9081
1.819 8813.81 2433 0.27604 84.8516 1227617.3013 114.442 4085.96 44 34.8702
4.504 9885.39 3123.55 0.31597 93.6748 1393406.3383 150.869 3994.67 36 34.426
6.384 13178.9 4526.18 0.34344 132.412 1837431.7498 181.629 4387.34 44 31.1643
2.362 11671.8 3964.72 0.33968 127.836 1631451.7351 181.814 4207.12 33 30.4994
3.127 8547.91 1891.14 0.22124 100.013 1197956.4492 118.911 3820.09 37 34.4849
1.824 9628.38 2845.83 0.29556 101.112 1350761.3293 134.066 3656.09 8 35.28
1.289 5772.31 1396.01 0.24184 56.8611 796262.391 83.6407 2631.84 23 40.9908
16.644 7213.06 2294.97 0.31816 59.7648 1001945.3467 96.741 3022.65 63 40.0901
11.868 5601.8 1276.01 0.22778 37.3844 692709.2137 93.2833 2714.9 5 37.4495
1.39 8830.37 1897.93 0.21493 77.3504 1281269.0575 106.543 3884.29 9 34.8064
14.148 7747.52 2054.08 0.26512 72.8139 1094240.7715 87.7675 3148.68 50 39.98
1.823 10843.9 2477.09 0.22843 113.014 1527702.8779 149.958 4580.95 62 32.5067
17.626 14623.5 5132.84 0.35099 121.202 2083904.1739 211.232 4605.08 137 33.0071
18.882 13783.1 4867.5 0.35314 124.855 1974900.486 212.703 4945.29 136 27.8231
5.83 10437.2 2674.06 0.2562 94.9381 1464357.2319 139.996 4069.64 149 33.5414
3.587 8747.78 2552.72 0.29181 97.2563 1176924.8393 126.368 3367.17 69 38.175
1.769 8067.24 2275.93 0.28212 89.7446 1131128.2881 102.425 4017.37 21 35.8618
4.008 5168.72 1676.04 0.32426 45.2684 725483.2501 64.8397 2007.64 3 42.2521
0 5435.54 1004.5 0.1848 48.9854 756944.3683 67.4329 2929.71 1 41.5276
3.747 11867.7 3632.35 0.30607 109.036 1625403.1748 166.557 4581.58 18 31.7069
2.432 12221.8 3043.85 0.24905 124.814 1664352.6782 159.379 3986.04 235 32.3237
2.117 5448.85 1618.3 0.29699 47.1738 759417.5461 70.8557 3065.55 18 41.0548
1.472 3748.31 855.43 0.22821 31.7945 536156.8206 46.3848 1754.07 14 44.4912
17.314 13677.4 4463.05 0.3263 123.725 1956065.016 174.695 5547.99 142 28.9607
1.97 9996.03 2700.49 0.27015 95.1648 1415377.8968 139.78 3701.47 125 35.4498
4.366 7697.74 2418.86 0.31422 70.6975 1086317.536 99.021 3410.9 40 36.6817
17.168 10929.1 4529.06 0.4144 93.8278 1532998.5863 165.413 3768.58 73 33.7784
4.867 14902.8 4429.81 0.29724 165.697 2064465.3442 237.957 4910.77 110 25.5941
3.58 9277.23 3179.47 0.34271 88.6872 1293668.5958 132.269 3746.48 20 37.6598
3.431 10448.6 2936.99 0.28108 112.053 1472091.0614 160.306 4249.11 65 33.4439
12.709 6081.43 2173.75 0.35744 58.2662 870126.4441 92.2224 3215.58 24 39.7939
14.079 8341.21 2004.65 0.24033 72.7346 1144237.5134 95.0722 3488.79 53 35.7202
15.44 10660 4553.23 0.42713 94.3496 1479627.1429 161.227 4306.29 80 36.5453
1.126 9559.9 1672.09 0.1749 100.208 1355378.8578 120.31 4015.89 44 35.2701
7.051 11031.1 2469.78 0.22389 92.391 1514641.5798 127.275 4028.69 132 33.8074
2.597 9240.25 1814.41 0.19635 88.6119 1296801.1412 103.453 4700.89 21 33.1574
1.531 15874.6 5234.59 0.32974 215.07 2210002.2743 262.374 5324.97 295 24.8234
3.327 12461.6 3698.39 0.29678 150.145 1716505.3773 178.632 4389.89 41 30.7252
3.31 10018.9 3744.66 0.37375 119.799 1380431.1155 177.799 3748.42 36 33.1845
6.408 6903.77 2761.25 0.39996 64.2579 981496.8024 96.7155 2375.81 75 40.4003
7.403 9200.96 3111.21 0.33813 93.6619 1329307.4845 142.468 3882.82 53 32.067
1.954 7635.69 2698.65 0.35342 77.6682 1059024.1368 98.8094 3842.01 36 35.6824
4.418 9040.47 2657.62 0.29396 65.7976 1252989.3063 131.274 3955.54 21 35.0971
16.489 5541.95 1882.11 0.33961 54.4296 771208.4926 84.7454 2702.23 47 40.4456
18.022 9153.31 3530.83 0.38574 100.151 1274354.5771 151.204 4023.23 61 34.6957
6.437 7516.9 1922.53 0.25576 76.2006 1020293.1717 99.2669 3577.09 34 34.7623
4.545 8983.88 2557.66 0.28469 98.7284 1260093.2204 153.392 4233.79 70 33.4139
4.894 6410.13 1540.48 0.24031 61.748 886140.3451 85.5025 3315.8 27 37.9924
14.255 7101.12 2098.56 0.29552 61.0322 993562.486 92.7175 2944.38 46 38.3351
1.951 12499.9 3065.94 0.24527 148.894 1724153.5329 205.545 4236.95 63 24.2918
6.805 9509.21 3134.18 0.32959 111.082 1311863.8377 153.773 4006.69 53 34.054
4.437 7060.04 2634.56 0.37316 76.7575 968649.1726 111.979 3949.5 32 35.1449
2.749 16265.5 5831.04 0.35849 227.665 2214313.7243 319.435 5916.35 193 20.9352
12.901 9228.07 2612.35 0.28308 82.6916 1304156.1 122.84 4174.19 68 34.3665
2.144 15240.6 3982.84 0.26133 199.368 2119539.8765 261.077 4971.25 136 27.4939
1.918 9673.7 2383.61 0.2464 111.238 1345623.1815 137.189 4169.97 56 33.8933
0.709 7816.26 2074.53 0.26541 89.0178 1100947.6497 127.534 3125.99 5 36.9605
10.986 5875.84 1925.28 0.32766 57.0766 818508.8183 78.0498 2722.87 41 40.5145
1.729 8157.52 1563.49 0.19166 74.8017 1149217.9758 105.827 3786.46 17 34.1732
16.465 9193.35 3182.58 0.34618 88.9118 1227170.5785 123.918 3736.79 32 34.7582
3.387 22937.9 7282.61 0.31749 310.117 3181268.2235 382.724 6284.51 102 18.9099
2.277 7893.39 1746.31 0.22123 79.4017 1122121.1983 98.8803 3883.72 39 35.3587
7.415 6472.59 2530.88 0.39101 62.5275 913986.1019 88.4869 2351.94 76 40.7397
9.785 16702.6 5376.67 0.3219 201.327 2229346.5707 240.276 5440.25 114 24.1095
1.563 8912.35 2426.4 0.27225 99.4618 1219017.4757 128.957 3453.48 124 36.3272
16.298 13264.5 4845.78 0.36531 97.6713 1841438.0861 181.883 5545.22 102 27.9791
15.283 6438.29 1660.56 0.25791 40.2439 886297.8504 80.3624 3580.93 40 39.9594
12.364 5880.22 1189.91 0.20235 51.548 825605.8471 71.3847 3048.93 57 40.0299
16.701 10686.4 4035.23 0.3776 113.681 1476986.8057 163.601 4568.79 145 30.4699
1.977 8859.43 2558.55 0.28879 79.7662 1233886.0991 112.87 4268.21 61 35.1277
13.395 7189.99 1408.95 0.19595 69.5716 1013358.7343 90.9469 3194.07 30 37.5949
1.873 14434.4 3843.73 0.26628 190.415 1970993.5033 217.965 4602.33 179 28.8378
4.393 15490.8 3854.27 0.24881 249.799 2108224.5905 261.771 4773.4 298 27.6559
2.766 7422.99 2215.8 0.2985 64.8606 1009247.4112 91.7462 3136.06 35 39.9737
16.472 7447.86 3032.03 0.4071 67.0604 1023742.9877 118.067 2790.58 88 39.1679
8.11 6042.07 1396.62 0.23114 55.4482 865155.6811 73.5232 2350.71 59 42.142
11.554 5132.69 1217.24 0.23715 44.6611 683560.1673 73.7594 2849.48 74 42.8814
2.218 5922.36 1603.96 0.27083 61.4959 746402.2155 88.2259 3106.44 19 39.3923
1.484 8423.28 2613.83 0.31031 97.1587 1156527.3741 144.861 3249.38 13 36.4711
4.268 19317 6449.2 0.33386 255.728 2675577.3697 329.657 5425.33 86 22.8087
4.721 8733.36 2443.67 0.2798 107.206 1241845.9486 136.639 3893.2 70 34.8217
20.091 18730.5 6761.55 0.36099 203.145 2590184.7238 296.4 6045.29 42 24.2788
13.804 10966.3 3379.87 0.3082 86.3535 1466226.0225 165.006 4180.57 7 33.2455
16.962 16995.8 5408.46 0.31822 175.942 2432196.1795 269.145 4894.73 148 27.4739
11.927 8272.24 2817.63 0.34061 78.0807 1105832.486 122.483 3508.71 68 36.6777
4.487 10638 3607.07 0.33907 93.1018 1442817.0348 160.003 4701.24 92 31.4605
8.519 18180.8 6172.93 0.33953 198.591 2478457.6285 273.51 5639.45 95 24.1192
18.806 8913.75 2504.43 0.28096 72.7225 1226641.2386 110.636 4540.28 86 31.0729
20.438 22574.1 9282.28 0.41119 183.542 3073494.7207 358.344 5266.45 94 29.3074
14.975 10045.8 4214.39 0.41951 105.876 1363665.745 151.04 3360.22 89 38.0532
7.538 5448.99 2528.24 0.46398 48.41 742111.8047 95.8521 2194.04 7 41.5378
2.162 14428.5 3979.79 0.27582 182.036 2044751.2242 234.596 4511.37 31 30.6557
2.177 15102.5 3274.62 0.21682 185.948 2107702.1377 229.475 4716.83 37 28.3731
1.043 7948.6 1609.4 0.20247 75.9739 1137172.8705 108.537 4045.88 103 34.9114
16.399 11219.9 3940.81 0.35123 104.135 1562039.7751 155.453 4001.24 25 33.6349
4.181 11799.4 3661.95 0.31035 126.299 1618749.3985 164.199 4989.96 82 28.6292
1.351 36995.4 13535 0.36585 312.05 4978616.0418 528.89 8946.71 278 18.6898
16.733 9452.16 3266.88 0.34562 72.3551 1315453.4637 130.123 3903.36 68 35.6588
12.539 5065.06 1814.25 0.35818 57.3966 661347.1783 88.2492 2643.6 5 37.3783
14.283 8738.51 3283.5 0.37575 87.7824 1186239.8522 143.184 3513.9 15 36.1974
2.629 3767 983.81 0.26116 35.0857 512452.4033 43.0478 1287.1 21 43.8093
2.699 8361.75 2096.22 0.25069 82.1739 1173580.7952 99.2822 3978.48 38 35.0081
3.493 7528.58 2903.77 0.38569 80.0061 1038884.29 99.22 3856.3 26 35.5734
11.191 4682.83 1635.61 0.34927 34.8794 665037.5552 60.8056 2594.31 53 43.162
6.025 8605.42 1967.89 0.22868 62.6548 1254158.1695 89.0824 3082.52 31 38.0895
1.181 9889.14 2322.78 0.23488 121.87 1372701.4551 160.722 4597.45 75 30.219
3.723 11625.5 4129.21 0.35518 125.902 1585368.3352 200.173 4088.82 34 31.9269
2.388 18613.3 5906.83 0.31734 266.57 2522865.0792 308.105 5721.71 306 21.5107
15.908 9727.83 3008.97 0.30931 76.2364 1344415.9203 105.188 3648.14 39 35.6269
2.233 10495 2410.89 0.22971 118.836 1414914.492 170.715 3992.91 83 32.5986
3.946 11801.3 2836.73 0.24037 90.0117 1654186.8971 149.66 4583.51 159 31.4906
13.402 6592.6 2308.28 0.35013 71.1308 930956.101 102.719 2924.32 20 39.6486
5.862 8938.51 2258.41 0.25266 75.2732 1263224.2567 104.669 4148.17 25 33.875
13.15 11164.6 4081.4 0.36556 93.3492 1580222.885 161.446 5527.04 98 30.2709
1.873 8421.44 2686.08 0.31895 94.309 1131704.6559 126.846 3158.26 79 38.9288
0.852 6897.71 2046.98 0.29676 71.5765 931485.1042 108.522 3051.17 82 39.0408
6.905 8371.58 2695.34 0.32196 74.6901 1170015.2535 103.231 4018.2 25 39.7432
15.196 8532.39 2448.18 0.28692 88.4333 1160465.5808 110.901 3785.74 59 34.8169
11.739 7533.26 2186.39 0.29023 61.1492 1036620.6677 102.228 2744.66 16 39.5697
1.309 15052 4741.54 0.31501 159.948 2074559.1223 229.032 5440.47 194 26.0683
3.178 9626.34 2898.47 0.30109 100.767 1345444.2344 137.074 4018.84 25 34.4512
0.811 8578.06 2148.14 0.25042 99.9224 1188513.3617 128.72 3275.27 5 36.698
8.931 8029.82 2489.94 0.31008 72.245 1136166.2138 106.614 3812.92 12 36.1089
3.935 7514.55 2100.92 0.27958 72.8904 1019700.1336 104.447 3386.78 74 37.0119
9.472 5610.18 1719.09 0.30642 45.4352 792055.8858 76.7441 2575.33 39 38.71
17.361 6482.62 2098.35 0.32368 61.5782 862383.2388 109.339 2732.11 51 37.8155
3.001 18535.1 5238.55 0.28262 246.58 2490569.8577 307.948 5657.78 312 21.747
3.306 5985.8 1515.57 0.25319 42.3021 834535.2676 81.5455 3354.37 30 39.4366
3.472 14161.4 4444.05 0.31381 173.937 2049197.7018 266.039 4926.79 80 27.0816
3.228 10957.2 3302.08 0.30136 129.597 1502091.0663 158.58 4896.19 70 29.3945
0.941 11619.6 2447.12 0.2106 150.601 1648498.552 171.178 4604.66 54 29.9873
18.055 12137.1 4651.53 0.38324 127.69 1758165.5106 190.602 5327.06 154 24.2331
17.904 7781.6 2781.85 0.35749 73.3459 1101757.2504 120.293 3654.5 82 38.1255
2.394 9337.76 3134.65 0.33569 114.678 1327950.4458 127.195 3759.37 79 35.2927
2.477 9461.89 2192.27 0.23169 102.476 1327435.4832 123.398 3497.62 122 36.5787
5.235 6460.73 1465.31 0.2268 63.8442 893218.7267 86.662 3344.48 25 37.788
2.598 14375.1 4289.19 0.29837 158.288 2043819.3156 226.81 4892.96 48 29.6996
14.503 7745.46 2947.56 0.38055 67.2899 1088238.2797 113.444 4010.52 66 35.4636
1.726 6867.66 1796.27 0.26155 66.7208 942432.8323 85.1582 3077.86 49 39.6067
15.253 6869.77 1477.45 0.21506 69.9211 975051.0803 80.07 2681.54 83 40.2066
13.969 5852.78 2423.81 0.41412 49.099 796014.1046 100.174 2491.75 64 40.8937
5.287 11072.7 3367.67 0.30414 101.011 1532094.7527 153.267 4336.41 24 33.3796
3.11 9170.27 2115.41 0.23068 93.7628 1286288.576 127.47 3857.31 42 35.0907
1.854 7190.9 1996.5 0.27764 79.3196 989385.7935 112.01 3066.54 83 39.1804
2.145 8861.36 2357.91 0.26608 85.5875 1206161.1066 118.23 3725.42 30 35.3986
15.215 19248.9 5915.55 0.30731 179.61 2716867.3572 241.911 6034.04 58 19.8175
2.837 8831.18 1884.89 0.21343 100.989 1238202.353 121.564 3842.13 62 35.328
2.838 7821.39 2376.08 0.30379 68.6263 1092956.9209 108.828 3649.33 54 37.4261
17.445 8972.71 3070.23 0.34217 67.4482 1269041.7613 124.684 3262.4 30 35.1555
10.907 10426.9 3264.65 0.31309 142.82 1472261.1572 204.469 4467.51 135 27.0117
8.879 6592.79 1390.15 0.21085 58.484 905147.041 81.0378 3323.1 49 37.8556
8.832 6746.88 1741.27 0.25808 67.9463 907092.3279 85.9085 3125.5 43 38.9146
9.991 9732.99 3371.16 0.34636 90.0883 1373012.5692 150.533 4112.8 88 34.1113
3.061 9326.77 2718.82 0.2915 94.4541 1315175.0559 138.385 3875.61 23 35.027
3.443 12486.4 3367.95 0.26972 145.294 1686868.5379 171.528 4553.63 70 29.98
2.211 6209.83 2059.9 0.33171 59.6476 862426.5974 89.8761 2685.9 42 40.5673
16.238 7842.12 1895.32 0.24168 82.0514 1042412.9279 107.241 3624.16 13 37.3123
2.793 10537.2 2789.87 0.26476 112.912 1473975.4433 150.883 4358.55 69 33.2879
1.387 6978 2621.71 0.37571 64.2611 1014271.9142 92.1611 3214.82 30 38.8772
8.461 6109.19 1447.7 0.23697 53.1591 840166.3966 73.9997 2872.91 35 40.0791
5.08 8882.48 2941.69 0.33117 97.932 1203145.4947 164.681 3974.38 81 33.3427
19.456 9095.9 2673.38 0.29391 53.7631 1292194.8805 103.669 3614.02 38 37.2169
1.678 8506 2465.44 0.28984 85.0566 1193757.2398 110.205 3912.64 34 34.547
16.7 7685.96 3209.73 0.4176 72.4252 1094516.3605 111.495 3203.68 31 36.0927
11.875 6513.63 1796.77 0.27584 54.6489 884474.5964 84.3464 2387.98 15 42.2284
13.777 8560.43 2261.77 0.26421 62.4025 1199709.9901 95.5332 3222.61 42 37.5415
1.78 13795.4 3600.24 0.26097 149.004 1935946.2236 213.588 5109.77 199 28.2246
0.893 9273.27 2588.57 0.27914 101.486 1274529.3337 156.216 4131.69 73 32.6396
4.902 7129.93 2608.12 0.36579 76.9063 993089.338 103.769 3684.51 40 36.4002
16.391 6181.04 1477.74 0.23907 66.4028 876411.1819 76.2301 3450.2 27 30.8459
1.59 3795.1 1143 0.30117 34.8686 518366.4873 46.6947 1397.18 17 44.3424
2.583 7454.81 2438.41 0.32709 75.2787 1035170.1539 101.67 3738.09 33 36.0898
11.151 4673.06 1862.09 0.39847 43.1314 674218.7277 72.0579 2386.54 53 39.1461
4.386 17247 6250.79 0.36242 206.084 2425906.6954 270.013 4847.66 107 27.1808
1.987 8970.45 2629.38 0.29311 87.3908 1277430.0058 115.287 4072.73 6 33.6723
9.009 6564.13 1624.81 0.24752 57.4446 873295.3994 80.8379 3246.58 59 38.1385
3.156 21577.9 5947.38 0.27562 302.403 2921166.5666 319.444 6597.75 291 18.5451
0.708 12696 2498.61 0.1968 151.194 1730873.4839 197.304 4732.78 146 30.3387
4.195 11382.7 3700.26 0.32507 147.77 1580096.1076 151.066 5123.73 37 28.7474
1.742 11569.6 2089.87 0.18063 151.031 1614799.6485 167.825 4661.41 154 29.3834
6.286 8805.84 2480.66 0.2817 66.0798 1213556.7272 116.269 4428.79 53 35.0919
4.287 11140.8 3406.6 0.30577 94.2935 1574217.3536 144.884 4288.15 102 32.3546
1.622 10202.7 2879.94 0.28227 119.421 1352660.8563 159.821 4120.87 43 33.5264
18.754 9213.68 3383.43 0.36721 65.4987 1256629.1642 126.022 3697.12 62 38.1529
3.171 9930.93 2748.15 0.27672 95.9616 1402084.4482 140.196 3695.24 21 35.6407
2.034 14384.6 5171.32 0.3595 178.398 2008311.1924 248.124 4340.36 43 21.7559
7.503 10044.9 3354.78 0.33397 89.6439 1404589.8144 130.716 3859.28 12 35.8102
1.984 9384.55 2031.35 0.21645 117.984 1304483.0978 120.158 4259.97 55 33.8016
13.439 6025.19 2049.4 0.34013 51.6455 835345.9751 88.6416 3070.48 93 39.1852
7.401 8206.88 2650.62 0.32297 81.1525 1120926.7561 108.142 3756.84 3 36.2897
4.074 18159.6 6344.95 0.34939 255.324 2346777.1403 232.293 15180.75 179 28.4705
7.698 9662.84 3038.71 0.31447 94.9145 1377038.4149 129.64 4204.83 90 31.6174
1.669 12199.7 3437.26 0.28174 153.257 1743463.9969 177.623 4718.67 27 28.7646
6.208 10471.9 3401.74 0.32484 96.5656 1486037.7381 145.895 4411.37 96 31.0597
2.99 10791.5 3052.99 0.2829 130.811 1531994.5777 169.277 4429.36 41 31.6719
10.902 8339.72 1523.67 0.1827 86.1564 1129804.0859 124.632 3932.64 63 36.2929
1.451 3828.53 1124.7 0.29376 33.3415 523319.3628 46.4711 1397.07 17 44.3027
1.99 15281 5064.79 0.33144 211.211 2120215.7032 262.593 5278.93 290 24.5885
18.881 9323.99 4402.41 0.47215 97.1406 1338794.5004 139.375 3999.02 37 33.9092
14.712 12376.1 3541.06 0.28612 66.3791 1721646.9385 153.396 4483.29 89 32.4758
6.314 10826.4 3303.22 0.3051 131.478 1469087.7283 188.549 4201.91 61 30.9324
1.564 13902 3904.31 0.28084 156.21 1935025.8685 236.006 4452.84 82 29.7514
19.08 8425.36 3026.85 0.35925 93.2177 1157892.5345 164.02 4017.39 49 33.3621
0 13134.7 1748.83 0.13314 142.703 1830883.8337 203.031 4895.74 78 27.2623
4.2 9496.66 2742.72 0.2888 91.791 1318652.2486 137.867 3819.66 30 35.5709
8.54 6140.68 2088.96 0.34018 65.0112 824084.4944 91.4673 3489.95 34 37.9225
2.939 11322.4 2888.37 0.2551 146.994 1618807.2586 159.39 4192.49 125 32.2732
12.021 8517.35 3439.32 0.4038 73.9822 1173857.0543 129.482 3159.05 16 38.1951
4.942 10102.4 2477 0.24518 92.2964 1398915.0597 126.537 3822.62 162 35.0108
5.029 6707.3 1653.17 0.24647 63.3675 929339.1686 84.5385 3280.6 23 38.1161
13.618 8312 2256.24 0.27144 89.0265 1171100.6299 110.391 3181.51 61 37.789
18.95 14124.6 5559.24 0.39358 178.952 1912223.3381 288.464 4401.28 84 32.2004
4.03 10382.5 4041.52 0.38926 107.118 1451085.3755 142.777 3803.68 20 35.2683
3.701 9387.41 2813.38 0.29969 84.634 1320017.6591 128.936 3982.68 63 34.4196
4.525 15037.6 4270.74 0.284 202.635 2081575.2751 267.557 5073.15 161 25.1532
0 21427.3 8183.98 0.38194 202.44 2828193.5252 360.797 6136.42 220 22.1892
1.851 9058.41 1892.15 0.20888 96.503 1252400.2838 127.894 3676.58 16 34.2437
18.303 8034.42 2174.08 0.27059 74.8425 1144520.6849 86.0595 2969.38 39 34.2574
12.296 8135.75 3870.28 0.47571 67.72 1202036.8212 119.69 4714.38 51 38.3976
7.195 8614.93 3373.85 0.39162 82.2739 1234108.0567 135.946 3684.28 50 34.7066
2.685 12130 3570.9 0.29438 157.233 1683797.16 183.548 4422.97 26 30.9675
10.245 7368.53 1998.43 0.27121 64.2562 1044850.9877 80.6653 2434.88 82 40.4242
4.295 11099.7 3289.51 0.29636 96.4823 1566679.0632 149.718 4318.09 94 32.4966
18.254 13182 4215.07 0.31975 111.747 1919360.9108 160.596 4877.16 95 32.8005
16.935 8798.79 3320.88 0.37742 73.5174 1188137.4344 139.922 3738.84 48 36.1105
2.576 26901.9 7393.17 0.27481 347.758 3644317.3585 424.542 6442 163 19.0271
13.06 5288.4 1721.95 0.3256 39.3578 747074.2226 66.2583 2780.88 41 42.1213
12.278 4444.76 1744.38 0.39245 39.5706 629088.1601 68.1412 2237.58 33 44.4982
1.698 6774.99 1714.45 0.25305 73.8758 906377.1659 98.6621 3448.7 75 37.8097
0.759 7876.73 2246.89 0.28525 88.2758 1081444.3 114.798 3095.97 21 38.3686
18.134 10171.5 3710.56 0.36479 46.5914 1350978.6573 165.859 4090.83 58 35.3017
4.412 8219.01 2336.08 0.28422 78.7472 1147740.0384 100.908 4147.42 62 34.8397
1.912 6281.09 1349.3 0.21481 67.2415 889080.9602 72.1844 3099.96 14 39.1681
2.283 5915.12 1958.89 0.33116 71.0127 823661.8711 88.7513 3008.37 34 40.236
11.443 7101.31 1745.22 0.24576 59.868 992107.7573 81.7604 3913.79 48 40.2175
14.149 5701.75 816.12 0.14313 56.5951 778681.7721 61.938 2323.81 17 40.8209
3.02 7810.49 1952.74 0.25001 85.4381 1097291.7651 101.764 3866.69 21 36.3192
18.26 11968.1 4586.03 0.38318 76.8 1623024.0938 189.227 5884.12 71 31.1786
13.496 5049.75 949.82 0.18809 41.2957 690622.9283 70.4142 2734.59 27 42.1151
0.595 7848.41 2119.84 0.27009 85.9272 1078877.7176 112.687 3097.54 21 37.6977
1.79 6608.95 1853.25 0.28041 76.1544 885301.3267 94.2768 3501.09 73 38.744
2.627 14776.7 4495.16 0.3042 179.026 2070578.8752 238.053 4449.31 16 29.8758
13.836 6096.83 2423.8 0.39755 52.6408 809718.2561 97.1919 2780.97 61 40.351
1.944 15194.1 4832.21 0.31803 219.472 2101706.4524 250.722 5274.46 288 24.725
15.134 18695.5 5059.4 0.27062 254.656 2583542.75 299.118 5346.67 210 19.5746
12.26 6312.74 1744.54 0.27635 60.8378 857991.1035 76.564 3134.71 28 39.3272
1.068 11084.9 2838.74 0.25609 137.466 1529838.3018 175.361 4640.11 161 28.5941
8.014 4690.63 1607.39 0.34268 44.4388 649987.2614 62.7123 1875.15 35 43.4571
1.926 9503.98 2622.46 0.27593 108.529 1279876.1247 149.962 4092.86 46 33.6152
1.749 5382.99 1876.03 0.34851 49.7174 761067.8228 75.3592 2335.88 19 42.1351
2.314 14643.1 3136.85 0.21422 191.298 2031083.0832 196.538 4049.7 133 32.223
16.249 8190.65 3065.81 0.3743 54.2014 1094100.9588 125.236 4612.79 29 36.9705
4.534 7750.26 1763.91 0.22759 71.2271 1051196.4828 111.208 3429.53 48 35.4187
3.785 5767.01 960.89 0.16661 46.712 794198.1012 61.5715 3053.82 18 39.5367
11.515 3911.74 1232.82 0.31515 33.1588 532414.2028 51.5892 1377.23 30 44.2859
2.232 8559.67 2268.88 0.26506 81.2293 1210528.6824 119.669 3331.53 8 36.4817
2.158 17122.9 5486.66 0.32042 235.003 2322114.5848 270.372 5361.01 122 24.1076
2.337 6507.13 2251.39 0.34598 57.9741 916284.2232 87.2037 2835.6 45 39.416
8.266 5667.15 2066.31 0.36461 46.166 772606.3692 75.213 2036.19 33 43.5279
2.615 6652.98 1761.18 0.26472 68.7839 878493.7223 86.4608 3710.26 70 36.8329
16.389 8159.27 2485.42 0.30461 71.6896 1117497.5514 111.913 3574.08 37 36.5669
16.775 6828.66 2577.39 0.37743 66.8127 978909.0707 95.2255 3898.8 85 39.0256
20.142 13307.5 4729.01 0.35536 137.434 1904029.8738 167.054 4978.54 55 28.2184
1.854 3945.62 1090.64 0.27641 34.3071 562995.0024 47.9543 1773.3 12 43.3287
1.796 8232.42 1612.04 0.19581 74.2207 1159507.8305 104.469 3778.36 20 34.2832
4.301 10598.1 3434.29 0.32404 100.91 1477429.8085 135.213 3678.15 28 35.173
3.21 12460.1 3211.12 0.25771 170.416 1733999.0188 201.432 4779.56 65 28.5857
15.057 9397.53 3020.87 0.32145 57.5895 1327189.0184 120.406 3164.86 22 37.1608
13.868 7750.22 1982.38 0.25578 85.3196 1104477.6155 114.696 3281.08 81 38.0254
3.408 6546.41 1449.09 0.22135 54.9037 913101.4374 67.7836 3248.37 27 39.9997
5.878 10272.5 3228.35 0.31427 103.606 1444740.7997 143.761 4210.14 28 33.446
12.464 7637.29 3193.19 0.4181 68.2643 1081826.1108 116.238 3575.8 58 37.0956
1.677 15160.7 4851.86 0.32002 159.373 2109115.5943 232.219 5340.81 184 26.5125
1.531 9438.24 2076.58 0.22001 108.314 1309036.9062 129.77 4220.36 55 34.0068
4.632 8124.41 2473.54 0.30445 81.6414 1139575.4068 117.811 3809.04 72 34.8119
8.924 6963.5 998.11 0.14333 67.0012 974604.0592 73.6974 2979.19 28 38.979
19.559 14975.9 6027.26 0.40246 111.143 2085048.2721 219.441 5146.88 72 28.9033
2.058 5912.82 2068.69 0.34986 69.9499 821200.0038 88.8558 2987.3 34 39.8224
2.079 6984.8 1761.7 0.25221 73.1977 933291.2864 98.3967 3483.92 79 37.7586
17.98 12546.9 4621.58 0.36834 131.8 1798217.2324 178.341 4445.3 78 27.7064
11.921 6003.05 1910 0.31817 70.8739 842844.9511 81.8418 3411.99 24 38.5655
4.892 5727.89 1560.21 0.27238 56.051 795048.5451 77.3761 2742.43 46 40.2421
14.972 10272.3 4061.19 0.39535 75.9342 1414039.8127 146.728 4430.78 66 34.258
2.578 14651.2 4250.55 0.29011 169.58 2101027.2065 257.189 4923.81 71 27.1765
1.083 8720.62 2532.53 0.2904 102.122 1190412.9802 157.023 4081.17 79 33.5207
0.936 23372.6 5394.91 0.23082 318.199 3217488.966 398.729 6234.09 154 19.8235
2.959 14858.8 3732.08 0.25116 217.843 2060344.4648 244.292 5105.18 142 24.8743
11.107 5261.22 886.82 0.16855 52.7651 718530.9654 62.4016 2348.03 32 41.0007
16.231 7725.48 2546.72 0.32965 74.6927 1075573.554 97.4814 3031.49 22 38.53
5.297 6851.55 1827.27 0.26669 78.3263 929985.8507 97.5071 3382.39 65 37.5723
1.741 8462.66 2163.71 0.25567 87.6591 1193447.3923 101.547 4281.43 35 34.4213
5.635 14851.7 4237.49 0.28532 174.314 2045192.0922 231.662 4958.52 119 29.1472
11.634 7461.37 2754.86 0.36921 76.9673 1072273.1084 121.375 3429.3 69 37.0433
2.027 5768.63 1967.56 0.34107 70.2113 798661.4234 91.1312 2980.75 30 40.4951
3.723 10287.7 2342.38 0.22768 97.081 1459481.57 135.298 3602.09 139 35.9571
14.525 10658.9 3908.75 0.36671 82.2334 1512005.7623 162.849 3663.13 69 35.6189
3.367 12197.4 3215.1 0.26358 136.022 1706287.6911 163.699 4542.05 52 26.3667
10.59 4782.52 949 0.19843 37.0115 674466.457 48.8908 1796.78 39 44.0068
1.95 7195.47 2314.74 0.32169 80.5276 1004843.0934 87.2104 3719.99 34 36.2193
3.266 10854 3899.67 0.35928 105.749 1574561.5521 162.081 4504.57 89 31.3746
12.291 5874.77 1525.28 0.25963 43.2846 804693.8354 90.4548 3218.61 27 41.8922
2.703 9617.3 2600.79 0.27042 91.6718 1346393.704 135.613 3650.29 120 35.7159
1.157 8962.92 2361.2 0.26344 111.578 1237099.611 122.496 3270.34 8 46.5464
1.575 7276.86 1687.48 0.23189 87.5995 1016235.709 104.512 3843.97 24 36.2756
1.186 15117.1 3760.87 0.24878 183.838 2144698.1356 208.076 5667.95 67 23.1595
13.719 6518.87 1334.36 0.20469 57.3745 899764.4456 75.7344 3124.87 29 39.7081
17.395 9107.09 2485.89 0.27296 89.0661 1258468.4949 112.072 4143.9 53 35.2437
2.133 6906.69 2193.41 0.31757 61.0412 931757.8668 98.8003 3113.34 30 40.2006
17.337 7329.22 1529.78 0.20872 70.3024 1002313.0051 86.9146 3727.34 90 35.3856
17.519 16286.5 4345.59 0.26682 188.297 2226961.9793 239.404 5218.57 163 26.4006
3.908 7829.37 2024.19 0.25853 76.5839 1115648.0147 118.459 3298.05 34 38.1053
2.16 15873.3 5154.06 0.32469 148.643 2281032.8767 231.431 6683.4 88 25.0479
12.733 6697.59 1774.72 0.26497 55.8452 909448.2334 86.0015 2636.48 26 37.6933
4.595 7560.4 2514.52 0.33259 63.8161 1000946.3446 115.702 3364.7 35 38.8732
3.948 7004.16 2205.36 0.31486 94.1803 938148.8878 112.46 4138.73 88 34.1332
1.769 8298.63 2543.12 0.30645 85.6459 1170889.7188 138.033 3602.58 14 35.5267
6.968 12946.4 3680.17 0.28426 143.168 1767007.513 192.59 4657.81 63 31.1362
5.264 6395.68 2377.96 0.3718 60.1708 844352.3106 100.714 2888.08 33 39.787
20.624 18206.6 4745.39 0.26064 173.265 2530127.8562 216.696 6074.43 153 21.0271
20.441 9908.15 3662.99 0.36969 108.176 1379816.9162 160.583 4446.83 139 31.9052
6.113 14535.6 6237.32 0.4291 189.449 2104519.9054 289.888 4971.56 115 28.3747
2.313 14549.6 4106.41 0.28223 163.275 2092911.1027 214.064 4781.59 48 46.5464
6.442 17358.8 5624.3 0.324 228.29 2395456.7249 299.179 4848.28 140 26.8966
6.058 6129.56 1611.55 0.26291 64.8801 854311.4437 71.7763 3062.96 24 39.4191
10.16 8013.57 2292.48 0.28607 65.3432 1156366.4323 94.4781 2603.05 56 40.3813
2.064 9784.57 2453.46 0.25074 98.726 1349049.1963 130.621 4296.9 42 33.45
3.452 9545.75 2522.36 0.26423 109.649 1346925.2717 154.146 4186.26 51 33.879
20.536 14123.4 4824.84 0.34162 106.921 1959338.7263 187.983 4689.93 27 35.1625
3.323 21147.9 6112.53 0.28903 244.95 2914716.8787 316.374 5605.99 84 23.0401
6.375 14307.1 4761.23 0.33278 183.923 2004272.3509 238.709 4539.88 36 29.103
14.939 9633.14 2934.78 0.30465 74.9217 1321354.2789 107.343 4526.18 40 32.4777
2.962 8733.3 2502.7 0.28656 97.9567 1233381.8205 118.445 3619.84 92 36.1622
16.081 7097.63 2504.03 0.35279 67.1112 958671.7412 117.374 3439.9 75 37.1196
1.87 8816.23 2458.97 0.27891 81.9783 1230620.9414 106.796 4253.56 61 34.6746
15.269 7006.14 2558.68 0.3652 63.4523 937877.0324 112.076 3298.69 53 38.2657
1.651 6202.55 1952.34 0.31476 59.3272 854667.939 95.2775 2683.41 49 40.6568
1.625 11978.8 3264.59 0.27253 148.947 1714592.5427 165.169 4672.73 27 28.6162
2.302 7185.4 2194.34 0.30538 64.9233 989583.5423 100.924 3192.63 45 40.12
1.645 9701.76 2577.12 0.26563 106.439 1379582.8821 140.867 3938.65 39 33.3499
1.068 6090.15 1297.14 0.21298 58.2729 838846.5602 80.5255 2810.99 17 40.3307
3.534 10037.8 3285.15 0.32727 105.174 1415583.1148 135.173 3719.02 18 35.2048
10.382 3599.83 998.71 0.27743 29.5715 504829.7929 46.4352 1700.71 36 46.0396
14.695 8396.06 2371.38 0.28243 84.3904 1176861.7698 117.025 3151.63 89 37.4435
19.128 9719.25 3110.19 0.32 73.8478 1378817.9898 132.208 4343.06 13 33.3033
1.099 9846.99 2684.44 0.27261 107.91 1346511.8642 159.547 4224.91 78 32.6179
4.525 10767.4 3809.39 0.35378 69.4174 1468596.5361 147.104 3747.07 44 35.1423
5.361 11172.8 3329.33 0.29798 133.524 1536739.445 154.936 4961.25 76 29.9305
1.602 4183.34 1342.69 0.32096 36.2939 572443.6343 52.1729 1444.59 16 44.4883
4.505 8306.28 2569.94 0.30939 66.2457 1158446.5254 107.903 3321.95 37 36.2192
6.681 8095.38 2584.51 0.31925 71.9334 1144000.273 110.456 4040.55 15 35.2636
3.723 11489.7 2763.67 0.24053 130.653 1584520.1682 151.309 3942.12 19 33.3868
2.238 13466.8 4579.02 0.34002 192.685 1841357.4754 245.982 4546 41 29.2577
14.633 9614.22 1611.87 0.16765 90.824 1367701.045 110.838 3989.19 68 34.237
20.794 11876.7 4125.09 0.34732 92.4816 1642876.7941 182.755 4339.91 62 31.6656
1.93 5756.41 1814.3 0.31517 71.0613 793509.0112 87.2464 3047.41 41 40.5684
20.74 16762.2 6647.69 0.39658 129.774 2379042.4393 232.746 7821.03 145 29.9499
12.698 6590.82 2066.31 0.31351 66.6322 927368.7595 82.9868 3342.63 47 38.5937
13.709 9511.54 3051.96 0.32086 96.1996 1312488.3747 135.708 3746.11 92 36.7205
14.224 8152.4 2390.55 0.29323 74.2275 1144639.3679 98.4729 3388.13 33 31.6322
11.962 9067.34 2695.96 0.29732 91.8958 1252184.61 107.061 3731.53 32 36.857
3.351 23148.7 6770.17 0.29246 303.962 3174938.8725 374.145 6392.75 98 17.6748
17.169 9194.37 3776.13 0.4107 67.1036 1270888.2266 136.893 3605.57 62 37.976
16.003 7263.78 2729.16 0.37572 79.4854 997596.3875 116.513 3624.82 66 35.865
3.26 19477.9 7038.13 0.36133 239.873 2698144.7943 331.689 5495.04 87 23.548
15.984 9535 4141.24 0.43431 88.0357 1404334.5141 138.605 3873.33 66 36.9135
1.623 6535.63 2366.02 0.36201 57.7432 905957.5471 98.1186 3523.54 73 36.4269
1.859 14118.6 4283.97 0.30342 177.549 1977894.9427 237.781 5266.72 168 25.4081
18.528 10820.4 4074.16 0.37652 91.9641 1523410.2266 149.439 4205.39 110 32.9744
8.328 10159.9 3370.89 0.33178 94.4377 1445714.7668 141.353 4121.44 96 33.731
2.917 5718.62 1423.52 0.24892 46.27 813637.9523 61.7174 2561.85 18 41.3736
9.553 4982.85 1082.54 0.21725 51.9082 645098.031 57.9701 1955.28 19 43.0329
2.854 5819.05 2353.58 0.40446 34.209 821751.751 82.4912 2723.17 47 42.5807
10.543 16346.8 5805.01 0.35511 131.689 2357175.105 225.543 5281.7 75 25.9041
0.755 10996.4 2621.23 0.23837 138.997 1526296.2358 167.537 4721.52 175 28.4846
0.676 5969.11 834.57 0.13981 48.7699 841461.269 71.2521 2652.31 1 42.3177
12.389 7063.45 1608.75 0.22775 73.222 938710.4831 87.9396 3565.72 99 33.1111
2.388 5293.65 1618.41 0.30572 44.6322 769912.8365 62.6281 2346.67 18 40.3015
11.461 9301.52 1894.17 0.20364 94.8218 1310644.6214 124.932 3821.61 48 33.6091
14.05 23027.3 7072.27 0.30712 313.363 3177080.8309 372.082 6292.28 102 15.228
11.517 4306.96 965.84 0.22425 32.2442 593725.5312 45.8212 1910.64 33 44.5104
2.049 10052.6 2968.9 0.29533 98.069 1415528.9096 136.543 3699.17 124 35.1526
1.28 14894 3790.17 0.25447 178.531 2104681.6484 211.806 5692.91 67 23.0148
6.989 8759.69 1627.85 0.18583 76.6229 1188445.9412 105.526 3768.19 24 38.7522
10.141 10625.9 3563.9 0.33539 108.585 1454492.2281 160.838 4401.91 36 33.4642
2.74 12958.4 3493.28 0.26957 162.594 1798705.2028 211.935 4827.72 50 28.4308
14.03 9856.54 4150.86 0.42112 90.5137 1379653.2793 167.413 4306.6 86 36.1434
1.9 6253.12 2310.44 0.36948 60.9102 869919.1142 89.4148 3583.35 75 37.4572
7.467 6250.79 1699.98 0.27196 56.8189 849627.6953 87.1162 2923.19 30 39.1109
1.456 4646.76 1353.38 0.29125 45.8721 650842.8403 63.4086 2136.08 20 43.5836
7.222 5240.56 2056.84 0.39248 33.0291 738188.3376 71.6019 2523.43 54 44.5704
2.413 8351.82 2458.72 0.29439 96.216 1173313.2681 120.711 3582.77 94 37.0181
2.788 18396.2 5680.46 0.30878 257.954 2480014.6479 308.204 5766.29 306 20.4725
1.459 6573.38 2181.7 0.33189 64.4343 886002.0557 101.496 3100.7 21 40.1543
2.15 6078.68 2116.54 0.34819 55.2984 850639.1588 91.3209 2803.22 45 40.6788
15.992 8077.45 3402.2 0.42119 66.8703 1110429.1164 123.237 4177.19 84 37.2039
15.749 6695.58 2493.04 0.37234 59.1607 909461.5711 102.349 3393.04 33 38.0606
2.957 7930.92 2304.91 0.29062 83.1068 1132025.4033 118.349 3788.34 18 35.0043
18.568 9551.12 2992.58 0.31332 71.2041 1347587.1742 118.796 3783.38 39 33.619
3.746 10199.2 3270.74 0.32068 87.0324 1446909.8538 142.438 3615.12 11 36.7011
12.938 8508.96 2660.52 0.31267 76.2437 1156732.4417 108.329 3934.79 91 31.6397
1.861 13654.3 3758.79 0.27528 189.462 1848112.8658 211.566 4600.74 179 29.2885
11.533 13354.4 4263.56 0.31926 111.106 1858177.1488 174.585 5304.29 73 32.451
2.441 8352.67 2228.65 0.26681 84.0696 1194491.8351 114.882 3302.66 6 37.8971
12.771 9380.67 2674.2 0.28507 75.3992 1339188.0401 98.9648 3506.3 30 34.1366
7.459 12748.1 4547.97 0.35675 182.856 1651009.6395 251.157 5138.51 79 27.9508
18.024 9539.29 4072.96 0.42696 92.5902 1342645.5531 148.442 3989.26 89 34.2695
11.257 5190.83 2077.8 0.40028 35.0916 736414.8675 68.4241 2558.23 39 44.6179
5.16 7842.2 1958.38 0.24972 86.3851 1046844.8855 113.7 3819.95 36 36.386
6.922 10953.5 3681.25 0.33607 77.8638 1520927.1046 156.81 7732.25 12 34.9987
2.992 14248.6 3771.24 0.26467 198.783 1946365.2098 257.45 4880.47 149 25.3981
1.765 6935.18 1858.64 0.268 63.7031 952253.7783 86.4837 3040.46 49 39.8218
2.343 8129.94 2706.73 0.33293 91.336 1154227.7746 107.59 4032.89 25 36.3155
8.398 4656.37 1676.58 0.36006 38.1194 658859.8047 65.8352 2526.26 43 42.7422
2.182 9125.24 2076.25 0.22752 85.8192 1294567.2439 110.187 4667.44 28 33.1617
14.537 8506.7 2913.6 0.3425 36.9261 1166889.7327 123.38 3917.31 40 37.1718
2.59 7825.68 3113.91 0.3979 77.6324 1096946.3043 119.703 3293.93 39 37.7319
12.273 6108.3 1749.83 0.28646 71.4128 839177.6501 89.6949 2867.29 18 38.6551
14.797 5800.94 1898.93 0.32734 53.5386 794389.0948 86.558 2396.8 94 41.4551
1.787 9187.14 2848.16 0.31001 86.1419 1231157.611 145.224 4043.83 34 34.8849
0.625 7837.64 1988.49 0.25371 84.715 1094896.8482 129.578 3141.9 4 37.4335
10.785 4935.15 1790.08 0.36272 34.712 687850.4103 68.0309 2818.01 46 42.0968
15.257 7131.17 1718.36 0.24096 56.4327 973793.5836 93.4859 3208.27 33 37.8968
13.11 7211.26 2795.88 0.38771 77.7981 1020460.8199 132.806 2831.97 45 38.5815
12.923 15286.4 5247.7 0.34329 156.877 2199510.0214 239.715 5586.54 151 24.5921
15.936 8992.29 3448.08 0.38344 97.9145 1256943.944 126.769 3366.34 68 36.0416
2.035 5832.24 1612.22 0.27643 54.1867 813511.7246 92.2792 2727.19 87 40.2515
4.162 7695.48 2782.21 0.36153 61.925 1053616.7607 95.6886 3360.16 43 37.8684
4.836 6383.93 1228.54 0.19244 55.0556 895224.7005 65.7043 3058.76 19 39.5791
11.709 5776.58 1650.69 0.28575 38.8613 790742.2674 97.6315 3180.48 25 42.508
2.677 13796.5 5033.27 0.36482 130.365 1933881.8005 214.001 4679.23 61 27.8314
1.823 8618.7 2136.07 0.24784 87.1449 1185539.5874 142.282 3198.85 11 36.7779
0.797 12224.4 2234.41 0.18278 152.676 1658894.1369 187.806 4882.98 140 29.9201
3.428 7433.66 2203.75 0.29645 69.5579 1014690.3457 107.776 3354.48 77 37.1877
9.4 17009.8 5405.59 0.31779 170.838 2320307.106 222.433 5576.75 120 24.5892
15.401 7657.1 2236.54 0.29208 68.8315 1078557.4322 97.8298 2891.73 36 39.071
20.703 17361.5 6298.22 0.36276 182.21 2431786.9863 250.407 6006.36 135 24.9783
1.469 4066.38 1175.19 0.289 31.3757 555841.7744 49.8146 1408.75 17 44.2712
0 10825.5 3264.61 0.30156 124.847 1502580.8629 149.595 4400.53 39 32.5534
3.23 12804.9 3717.76 0.29033 133.769 1768307.2645 163.997 4731.93 56 28.2196
1.045 8357.05 1550.51 0.18553 77.435 1193718.4234 96.195 3949.9 14 36.1294
2.247 9567.75 3370.09 0.35223 92.8058 1343504.1635 150.489 3814.52 79 35.5643
14.218 6310.32 1699.29 0.26928 34.9153 788935.8424 93.7243 2928.53 40 40.404
14.542 11482.4 4693.49 0.40875 106.001 1565151.956 186.198 3978.56 80 35.4746
2.749 13218.3 3982.56 0.30129 158.494 1909144.9293 214.584 4654.48 54 29.5559
19.784 10974.3 4881.72 0.44483 90.7694 1477793.4213 162.093 6357.26 70 36.1651
2.375 13170.5 3292.64 0.25 169.446 1836218.8223 211.245 4997.59 184 27.9261
4.905 9642.01 3061.19 0.31748 93.565 1369194.3466 134.922 4061.82 107 33.1917
17.669 12131 3841.8 0.31669 93.9659 1676709.2776 165.077 5385.49 105 32.9315
3.77 7544.26 1956.06 0.25927 89.106 1021723.8758 119.413 3576.25 39 35.5648
1.352 8735.76 2223.56 0.25453 89.9902 1226820.4475 133.92 4124.75 170 32.573
20.376 11197.9 4369.09 0.39017 78.5252 1584870.209 165.43 5196.35 61 34.0411
12.482 10336.3 3660.02 0.35409 96.4215 1473978.769 175.195 4318.92 98 32.896
5.093 13958.6 4562.33 0.32684 146.497 1924855.7367 200.363 4993.39 123 27.9486
1.557 15489.8 5432.76 0.35073 184.414 2152730.4035 253.764 4592.46 37 25.1283
2.513 17747.7 4843.8 0.27292 229.735 2469995.7016 277.015 5718.5 202 21.8964
4.106 8286.21 2341.84 0.28261 65.6894 1109816.3007 100.525 3572.03 24 36.8464
6.641 9410.52 1725.12 0.18331 94.122 1293435.9554 107.29 4153.11 60 36.3965
19.203 11806.5 5379.03 0.45559 160.661 1618337.1378 270.171 5024.92 148 27.2742
16.014 10058.8 2300.52 0.2287 88.2436 1413277.4304 127.553 4121.94 81 33.164
6.856 19370.4 7552.2 0.38988 153.056 2656883.2731 330.525 12912.15 52 34.5308
3.894 10536.1 2468.96 0.23433 105.694 1485382.7065 150.191 4435.38 71 33.1865
16.323 10072.1 3801.1 0.37738 94.4297 1373403.0193 131.87 4369.63 38 36.6129
2.676 9335.18 3437.49 0.36822 84.0985 1295463.1822 133.217 3766.92 121 34.6888
14.37 9060.33 3194.19 0.35254 93.2377 1251254.7954 114.531 3958.01 20 35.6881
15.134 13539.4 4487.44 0.33143 173.277 1925222.0396 237.826 5129.11 66 25.9015
9.162 6645.96 1809.55 0.27227 69.5862 927796.5301 84.9156 2915.56 75 39.2326
1.555 10102.1 2999.79 0.29694 126.201 1396576.3062 167.73 4652.24 76 29.8578
15.491 9365.55 3739.09 0.39923 86.9882 1299338.9431 154.867 3784.32 18 35.9567
1.024 7044.61 2776.25 0.39409 64.0054 1029221.82 99.7137 3227.42 28 38.8629
6.074 8331.58 3737.49 0.44859 79.2888 1171980.5305 140.001 3553.85 47 37.6998
1.651 9716.11 2142.14 0.22047 108.271 1351238.7225 134.005 4215.75 53 34.0443
8.337 3836.91 1248.06 0.32527 31.2721 543050.5243 49.9264 1947.91 64 44.8434
3.044 14500.1 4752.12 0.32773 156.642 2013288.3664 202.558 5072.47 79 27.0708
1.477 4978.46 1736.61 0.34882 49.6151 696637.2334 71.65 2177.75 29 42.932
5.341 13743.6 4859.59 0.35358 163.032 1907697.4187 202.263 4982.14 84 27.6486
11.249 4670.89 1866.32 0.39956 46.7282 686984.9356 66.6405 2334.29 57 43.1816
13.732 6990.33 2064.54 0.29534 63.2512 987295.1491 103.594 3352.18 33 38.2118
2.673 9109.13 3488.92 0.38301 90.8499 1190425.7925 151.535 3683.83 54 35.7812
17.927 8097.82 2300.45 0.28408 67.132 1128480.2698 91.0345 3527.68 37 36.7983
6.975 14439.2 4925.69 0.34113 163.541 2096666.9362 230.751 4783.95 60 29.1497
0 14170.9 4176.17 0.2947 172.15 1960211.091 211.025 4780.85 78 46.5464
13.493 6958.85 1695.15 0.24359 63.2945 975397.0934 78.5172 2934.85 33 39.3618
1.692 15372.2 4178.01 0.27178 187.712 2176388.1096 220.239 5689.32 64 23.127
1.791 7739.17 1979.66 0.25579 88.0217 1087290.0102 109.093 3884.18 20 35.5217
1.616 6088.22 1872.52 0.30756 68.6115 847109.2305 91.096 3037.17 34 40.1887
15.161 6034.69 1988.49 0.3295 85.654 842669.2003 117.816 3400.06 83 35.3546
1.583 13077.1 3790.16 0.28983 156.018 1825454.2052 234.606 4334.78 88 30.5491
12.554 8041.23 2676.72 0.33287 68.859 1080809.7946 104.818 4043.47 65 37.0119
4.139 10363.6 2083.95 0.20108 87.8054 1447825.0197 122.871 3988.78 156 31.8885
5.098 5792.54 1526.02 0.26344 56.4898 752204.3454 77.811 2966.91 36 39.4497
15.847 8065.92 2529.96 0.31366 65.5832 1135244.9835 105.796 3106.88 104 35.7778
12.043 9083.7 2383.33 0.26237 76.6683 1242085.3898 93.4239 3548.35 37 38.4931
5.504 34139.5 12717.8 0.37252 212.28 4729548.7047 525.076 8834.52 171 25.4176
1.662 12124.4 2490.09 0.20537 149.022 1689278.4011 175.783 4647.98 144 29.7537
1.648 8095.05 1743.51 0.21537 98.407 1112828.1876 111.09 3334.74 114 34.9575
17.06 8986.12 3181.4 0.35403 66.629 1283633.7979 127.613 4683.62 67 37.8004
8.727 18509.7 5638.02 0.30459 205.425 2550532.6609 289.562 6220.54 251 20.6565
1.933 9965.16 2988.28 0.29987 100.845 1362244.0971 151.349 4088.02 118 32.8819
12.799 8904.8 3130.4 0.35154 92.4014 1260058.2575 110.167 3824.86 33 34.8929
4.449 8993.02 3421.63 0.38047 92.0166 1263358.769 131.934 3591.33 38 35.8413
4.017 7038.73 2293.09 0.32578 70.7471 951757.8034 114.905 3267.06 72 36.608
19.512 13593.7 3418.63 0.25148 184.185 1863053.4979 227.396 5207.49 181 25.1831
18.85 14275.3 3457.63 0.24221 140.921 1954956.1343 206.322 3863.03 137 33.3164
2.811 7829.75 2728.31 0.34845 70.037 1077650.4756 107.08 3202.16 21 38.1535
6.903 10789.2 4473.08 0.41458 132.353 1466941.5265 211.387 4494.44 179 30.7207
0.606 9404.36 2398.83 0.25507 102.3 1329943.7779 156.45 3820.67 15 34.1145
1.961 8711.16 1978.29 0.22709 102.9 1186366.2896 135.941 3995.81 40 34.0587
7.851 4119.53 1078.68 0.26184 29.9103 576107.5873 46.1489 2077.77 49 44.0985
12.132 4977.72 1587.07 0.31883 33.8 695671.0135 60.2043 2114.19 32 43.7673
5.628 7332.93 1921.06 0.26197 68.4368 1015218.7357 97.675 3184.36 38 37.8357
14.495 6631.52 1565.38 0.23605 61.1312 943412.4051 75.4482 3264.46 40 40.6895
2.555 9585.46 2373.55 0.24761 116.396 1317024.2239 136.911 4149.27 126 32.902
3.499 11863.5 3118.93 0.2629 166.833 1640180.9457 205.208 4764.38 66 26.5181
20.618 21699.1 6471.9 0.29825 179.874 2993627.9891 263.196 6364.6 149 20.4899
3.664 11922.2 3574.2 0.29979 151.486 1667984.1338 156.284 5208.61 32 27.4662
9.227 10836 2678.23 0.24716 90.8235 1489272.2335 133.813 5009 48 32.3216
16.493 6696.81 1923.89 0.28728 64.6127 837549.3879 96.5893 3208.85 25 38.1899
15.812 10352.2 4319.95 0.41729 74.4438 1435148.8401 162.27 7261.9 24 40.8969
2.192 8637.81 2205.94 0.25538 91.2878 1169544.8068 113.239 3743.17 32 35.3555
5.522 14101.6 4217.36 0.29906 148.657 1924250.3273 214.275 5348.05 10 30.9911
3.295 12574.2 3519.78 0.27992 135.578 1707486.6719 166.787 4050.66 193 31.8469
3.405 12096.3 3399.99 0.28107 171.389 1679761.9242 196.266 4782.04 67 27.3387
17.253 10462 4252.51 0.40647 61.8282 1368128.2502 174.213 3928.49 77 35.1218
0.63 9328.25 2508.39 0.2689 94.5896 1279099.9592 155.497 4099.67 79 33.1646
7.054 14696.3 6035.47 0.41067 199.315 1940654.3099 270.692 5188.22 68 27.0097
18.974 11650.1 4462.79 0.38306 121.831 1700092.6919 193.382 5081.5 78 28.4898
14.621 9038.77 3814.28 0.42199 77.6386 1229317.8732 139.561 3685.61 30 34.3715
5.971 11217.8 2973.61 0.26507 116.17 1587545.1384 149.645 4406.29 74 33.1811
17.507 11647.2 3629.24 0.31159 131.889 1555924.564 191.013 4539.68 143 31.0468
16.369 8713.56 2362.39 0.27111 94.5414 1236788.2441 116.506 3450.53 99 36.9503
15.24 13415.8 4557.71 0.33972 111.643 1951525.5281 184.82 4884.59 95 33.6917
1.886 13761.7 3084.89 0.22416 172.274 1874385.6006 211.745 4760.79 106 28.6021
15.941 7287.05 1893.42 0.25983 69.1407 1000305.853 110.565 3339.48 91 38.0338
13.168 4860.14 1183.78 0.24356 41.7873 666302.398 73.7034 2800.25 27 41.4505
14.227 5791.02 2469.65 0.42646 52.6563 794920.6975 94.8544 2504.56 79 41.1033
16.366 9702.38 3745.64 0.38605 91.6188 1368046.8355 146.634 3371.23 72 34.8966
1.5 6793.19 2195.63 0.32321 71.7519 935026.4805 96.0994 3717.01 29 36.3843
15.944 7175.32 3046.09 0.42452 72.4351 966938.5099 126.425 3214.36 67 38.1002
2.538 11360.7 2857.47 0.25152 144.699 1605595.0217 152.009 4148.02 122 32.2831
4.082 16196.3 4710.29 0.29082 233.942 2282791.1111 289.997 5633.43 123 21.6545
1.898 7803.06 1610.31 0.20636 79.5045 1091583.6475 106.922 3767.03 14 33.6765
15.444 8673.48 3947.35 0.4551 88.5579 1133265.3047 154.581 3452.38 56 36.6217
15.705 8661.32 3359.39 0.38786 74.9408 1195985.2506 136.03 3260.9 22 35.4669
2.573 8457 2298.06 0.27173 92.4137 1183759.3477 106.691 4061.37 25 36.8341
2.913 9529.47 3308.53 0.34718 104.324 1332997.6253 138.649 3690.76 20 35.6887
2.853 7697.67 3157.88 0.41023 78.4308 1076035.0469 125.175 3251.01 36 36.8626
1.778 8812.84 2303.8 0.26141 87.9201 1251141.5621 120.195 3997.36 6 33.9089
3.153 20936.9 8064.71 0.38519 187.202 2893517.6015 375.491 15482.05 141 27.2533
16.674 8262.32 4085.51 0.49447 79.6946 1137209.4015 151.677 3702.92 77 34.6961
1.492 11001.1 3262.62 0.29657 132.741 1549370.3128 179.612 4225.98 54 32.5075
0.906 8828.78 2684.95 0.30411 90.7003 1233537.1673 122.468 3195.14 22 37.7103
1.642 6220.32 2235.31 0.35935 68.5677 848165.2513 102.468 3024.13 47 40.302
16.31 9580.52 3446.84 0.35977 84.2779 1302261.543 133.231 4487.61 39 32.9018
10.184 8871.63 2603.64 0.29347 82.1144 1247627.5739 117.405 4246.27 40 33.5778
13.787 5402.41 2360.86 0.437 50.1116 757860.455 95.0952 2204.43 68 42.1964
1.75 13285.6 3877.38 0.29184 170.431 1851351.4934 225.984 4319.04 79 30.9525
0.6 7914.59 2179.61 0.27539 88.8108 1085437.1583 111.92 3099.92 21 37.6867
17.628 9273.59 3440.39 0.37098 70.4987 1287117.4322 136.872 3850.03 111 35.8733
13.794 9412.9 4222.96 0.44863 64.3116 1396225.5393 131.003 4266.45 70 38.9345
1.939 7359.75 2300.84 0.31262 77.3709 1017798.1518 96.4097 3737.23 36 36.2749
8.874 8777.11 2295.5 0.26153 71.0755 1240308.3644 100.935 3287.36 16 37.7525
2.996 10480.9 3265.34 0.31155 98.1669 1450251.4874 136.65 3687.59 28 36.8384
19.725 9706.27 4261.65 0.43906 69.6876 1346403.196 163.676 6600.18 77 31.7301
5.206 8164.69 2354.77 0.2884 92.5553 1150399.0711 118.226 3990.5 119 31.2104
1.68 4183.73 1256.66 0.30036 36.4069 569686.414 52.8901 1400.41 17 44.4069
7.284 3977.04 1594.33 0.40088 26.1914 544388.7614 51.7183 1979.18 3 44.001
18.45 9467.02 3175.58 0.33543 70.7285 1366557.6647 120.114 3496.97 96 36.6985
1.808 5383.18 1137.85 0.21137 50.7951 771658.0868 70.5515 2873.42 58 40.2026
12.349 6063.36 1435.24 0.2367 67.5376 824991.0499 79.0348 3375.25 49 37.8983
2.495 13776.2 4356.56 0.31623 185.116 1841710.3128 235.99 5125.98 214 26.1505
1.417 22179.1 6522.98 0.2941 291.358 3001379.524 331.452 6662.5 287 18.6908
1.881 16915.3 6023.77 0.35611 154.049 2425246.0259 268.694 5980.75 71 24.0555
19.998 8019.27 3273.44 0.40819 69.1938 1114984.3201 118.666 3413.91 129 36.7953
18.074 10757.9 3272.9 0.30423 103.523 1551310.3121 155.849 4234.3 159 29.5805
11.498 13852.1 5092.9 0.36766 165.301 1943026.9162 214.583 4945.5 149 27.7303
2.999 12562.3 4197.58 0.33414 134.796 1760109.7373 187.03 4256.72 41 31.9468
13.43 7674.18 3075.1 0.4007 58.1026 1069378.0163 109.923 3924.37 63 36.8735
15.095 8551.47 2193.58 0.25651 85.3349 1213694.7861 123.633 3693.05 94 36.5378
4.711 13347.9 4294.44 0.32173 108.316 1848435.3634 190.456 4389.17 37 31.9293
2.273 9172.54 3185.5 0.34728 106.644 1284427.4321 130.839 3665.72 10 34.8492
1.805 8385.79 2130.02 0.254 84.5367 1201392.4894 119.032 3890.1 12 34.3939
9.57 7328.2 2012.32 0.27459 57.4772 1036045.6158 98.8065 3045.74 45 38.5642
5.168 13508.4 3938.85 0.29158 149.626 1905570.7374 202.407 4744.69 88 29.0578
19.679 12824.9 4350.39 0.33921 134.769 1750997.09 193.717 3941.03 55 33.9147
16.713 13810.2 4476.47 0.32414 136.222 1850762.2975 180.101 4909.44 180 28.5294
7.454 18804.4 5833.92 0.31024 184.114 2588111.1796 255.074 6537.29 100 20.0722
0.962 11575.9 2348.21 0.20285 148.792 1623866.2426 180.732 4611.04 54 29.9508
1.3 7180.7 2667.59 0.37149 63.0736 1046751.2091 94.8793 3205 30 39.5931
4.362 9947.53 3065.35 0.30815 106.782 1392618.2234 173.182 4256.8 55 32.9639
6.523 17075 5305.09 0.31069 255.288 2360889.1403 347.282 5889.04 277 16.2175
1.837 4036.35 1394.13 0.34539 37.1703 566039.4556 54.7453 1823.61 16 44.3178
1.376 21664.5 6213.37 0.28679 308.088 2967712.2272 310.028 6589.69 285 18.6529
3.744 11330.2 2561.86 0.2261 95.8359 1507217.9758 174.306 3883.82 96 33.266
3.73 5873.27 1767.93 0.30101 52.8677 784094.3936 89.4221 2570.66 52 41.0533
13.46 15717.1 5549.85 0.3531 102.4 2176984.4552 217.108 5079.25 24 29.026
14.688 8530.5 3428.62 0.40192 67.2955 1227154.7188 120.617 3210.98 51 38.2044
4.565 11018.7 2944.99 0.26727 114.27 1527776.0692 144.472 3880.21 83 34.8346
2.232 3904.15 1023.75 0.26222 34.4942 556904.2573 45.7324 1781.92 12 44.505
0.587 6208.41 833.7 0.13428 46.3859 880256.2132 74.018 2751.33 1 42.0181
2.412 16540.6 5430.24 0.32829 208.067 2177268.0657 265.056 6060.78 255 21.7068
1.72 11584.2 2773.02 0.23937 147.128 1565484.4535 175.194 4547.87 57 30.4279
4.082 11833.9 3633.69 0.30705 105.125 1623917.6966 167.879 4588.86 18 36.2511
2.496 5337.44 1481.27 0.27752 47.6854 740411.917 58.9327 2012.99 18 43.3043
11.454 6461.36 1524.08 0.23587 55.4989 906501.9952 86.7505 3156.64 8 39.1729
11.691 12510.8 4502.71 0.3599 153.982 1770489.2335 215.61 4985.85 27 29.6104
11.443 7835.85 2467.94 0.31495 67.9597 1128266.6854 100.561 2817.22 79 39.82
3.395 12248.2 3125.54 0.25518 161.435 1682373.0386 209.225 4778.87 65 28.8207
2.838 9379.53 2106.92 0.22462 104.108 1303098.1408 117.782 4023.34 56 34.8721
13.209 5078.62 1759.17 0.34638 43.7723 708844.804 58.5043 3150.14 74 41.1957
19.987 16422.2 5364.38 0.32665 188.198 2289441.7694 240.371 5065.51 128 27.4173
1.574 7663.26 1680.44 0.21928 88.5794 1070970.7955 105.574 3873.36 19 35.5294
4.791 17104.6 4968.63 0.29048 236.206 2354672.485 296.499 5248.13 191 25.5721
17.522 7977.27 2203.22 0.27618 71.6028 1119330.134 105.239 3184.99 35 37.9116
6.834 4421.83 1344.1 0.30396 31.6837 620921.1357 52.7993 2230.63 56 43.4142
6.693 11494.1 4768.14 0.41483 85.4195 1585500.192 180.618 4180.3 95 32.632
13.047 6399.43 1116.17 0.17441 52.5645 890026.0945 71.7022 2891.38 47 37.9132
3.157 14500.3 3082.69 0.21259 183.281 2028577.8164 223.92 4889.58 83 27.4388
0.529 11746.3 2333.97 0.19869 150.917 1600143.4388 191.3 4817.11 143 29.8585
14.911 8939.53 2645.34 0.29591 75.9855 1205858.6679 115.723 3327.2 109 36.865
18.57 7713.52 1710.46 0.22174 84.0591 1089509.4249 120.254 3588.87 96 38.3318
4.254 7768.61 2085.83 0.26849 55.2074 1024281.0199 100.591 3235.42 48 38.4542
1.687 8357.59 1886.89 0.22576 89.1413 1175288.6467 107.757 3909.69 40 34.3903
1.551 13697.6 3380.71 0.24681 186.683 1871411.8336 210.376 4586.44 177 29.0576
12.247 5752.82 1454.01 0.25274 41.1821 781150.7264 88.6349 3434.29 31 39.5338
2.563 17507.3 5104.79 0.29158 224.469 2427592.1954 281.121 5785.31 201 21.6859
17.555 17588.8 5473.93 0.31121 201.299 2537703.5723 282.558 5205.86 258 21.8786
1.808 13827.6 3684.42 0.26645 198.198 1890466.4037 207.486 4577.16 174 29.2725
2.249 8458.65 2463.57 0.29124 92.9328 1181808.8035 120.998 3628.98 93 30.6827
2.012 17191.6 4956.49 0.2883 228.972 2404987.373 282.379 5720 193 21.9818
16.155 10417.4 3823.37 0.36701 97.8834 1464052.1826 140.378 3796.38 50 37.2654
18.994 10027.3 3798.65 0.37883 67.0119 1439907.042 138.401 4514.36 83 35.7365
10.94 10301.2 4034.2 0.39162 38.1603 1420586.0631 141.499 4138.21 66 35.6157
1.906 13195 4212.83 0.31927 146.405 1887849.6936 209.033 5843.95 88 24.3253
16.51 7480.81 2652.79 0.35461 58.6864 1011465.6109 110.399 3986.62 60 36.7165
2.468 12388.8 3361.19 0.2713 153.109 1728667.8085 202.663 4825.94 56 28.5022
2.557 15380.8 5017.85 0.32624 222.556 2111834.5735 254.669 5328.11 270 24.8694
3.721 5965.71 1321.74 0.22155 54.9128 858936.713 70.5442 2446.55 65 41.831
0.75 4813.16 1007.35 0.20929 46.6613 686311.7926 57.9128 2184.35 80 42.8044
11.622 11836.6 3549.4 0.29986 119.153 1697505.0901 188.499 4330.91 51 32.1812
14.816 7529.55 3050.18 0.40509 64.9277 1088473.246 99.8552 3888.28 75 37.7875
14.411 6687.08 2258.42 0.33772 88.6754 895258.2083 112.625 3292.91 85 40.0209
1.582 11792.9 3071.89 0.26048 119.657 1634009.0098 180.501 4079.39 72 32.2015
2.991 7577.9 2745.12 0.36225 79.9459 1038530.5396 94.8561 3363.99 58 37.7573
11.563 8643.11 2877.3 0.3329 98.7253 1216709.9291 128.228 3489.62 94 36.5788
16.919 8422.88 2523.35 0.29958 83.7488 1157370.1873 109.786 3838.73 46 35.7066
3.05 9068.27 1995.18 0.22001 96.7449 1281607.0094 130.622 3854.62 48 34.9438
2.072 9374.8 2769.96 0.29546 87.3136 1316547.5379 142.614 3904.56 9 35.1859
12.08 4610.4 1854.25 0.40218 23.6774 629544.9286 66.4917 1887.11 32 43.3497
2.509 9084.09 3236.35 0.35626 118.126 1191996.4236 189.166 4345.58 189 31.5205
18.838 13887.5 5110.77 0.36801 176.544 1908054.5771 247.485 4777.37 146 28.1754
5.844 10857.3 2408.88 0.22186 102.705 1519998.5463 146.903 3950.21 120 36.2299
1.978 11530 2756.56 0.23907 154.486 1586073.4426 185.11 3987.98 68 32.3373
2.85 6974.4 2166.64 0.31065 53.5844 909426.5389 115.196 5778.44 21 37.722
4.974 14490.7 5295.28 0.36542 192.774 1892842.8486 260.051 5214.4 70 26.8022
16.251 25889.1 11787.1 0.45529 204.159 3392471.4415 470.897 16477.11 133 29.083
4.804 4886.82 780.94 0.1598 44.0644 654731.707 60.8439 2629.26 12 43.1047
7.75 5161.79 1630.3 0.31584 41.0721 722949.5934 67.8193 2732.95 60 40.5166
12.228 4998.28 1079.98 0.21607 47.0241 648649.0732 65.347 2032.98 21 43.2944
14.849 8233.17 2497.83 0.30338 92.9123 1139048.8625 123.322 4091.43 136 34.4446
17.803 9966.57 4291.59 0.43059 108.96 1348245.0233 148.795 4328.81 106 33.866
1.882 9210.06 2080.25 0.22586 101.005 1257943.6218 147.706 4006.4 36 34.1406
0.818 9832.2 2775.98 0.28233 108.4 1349186.9852 155.13 4137.41 79 33.2062
12.367 6019.78 2198.21 0.36516 35.2168 815205.95 97.885 2173.04 16 42.4613
3.366 12440.5 3322.89 0.2671 155.933 1774689.0906 171.353 4697.23 44 29.0777
13.724 7819.81 2117.8 0.27082 53.0749 1064782.2454 108.858 2773.22 36 40.9719
2.182 6151.78 1529.05 0.24855 52.374 858793.5101 73.5477 3319.1 56 39.3326
7.204 5766.74 1806.69 0.31329 54.754 790849.6739 76.4333 3154.9 10 39.3934
6.795 8350.49 2825.08 0.33831 75.8711 1157159.6133 103.462 3936.92 17 37.9561
15.322 7632.29 2962.93 0.3882 63.5214 1045642.3925 121.653 3261.28 67 38.4193
1.713 7332.18 2408.09 0.32842 65.5759 990369.4337 98.94 3128.92 17 40.0643
16.963 7231.17 3622.55 0.50096 58.0247 993591.7002 117.573 4029.41 50 36.1005
1.943 8392.06 2273.23 0.27087 87.7983 1195872.4287 113.765 3552.18 97 36.8136
0 10734 2087.39 0.19446 143.246 1489002.2352 185.299 4650.89 51 46.5464
18.812 10925.2 3632.16 0.33245 95.9555 1479979.1494 142.9 5119.06 53 46.5464
10.081 6126.72 1615.3 0.26364 59.0217 879000.6654 83.4563 2391.96 27 40.7815
16.181 14052.6 4276.54 0.30432 159.01 1926571.2925 216.903 5218.85 12 30.8756
10.532 10081.4 3537.68 0.35091 97.2272 1418676.6968 132.943 3524.62 43 34.6822
14.207 7317.84 2972.43 0.40618 70.4369 1049599.8702 110.318 2869.76 87 39.325
4.203 19851.8 6655.01 0.33523 256.019 2784529.2672 324.561 5440.88 89 23.6099
16.122 5507.86 1570.72 0.28517 53.4941 743417.7107 85.3964 2449.24 48 41.8545
4.465 10440.8 3856.9 0.3694 84.9649 1417552.6766 165.083 4734.95 39 32.1872
4.07 5811.82 1053.23 0.18122 52.5591 799977.1539 65.2332 3034.98 24 39.7659
4.543 11700.3 3677.34 0.31429 76.335 1554444.5914 144.659 4005.71 130 32.3393
4.296 12177 4646.19 0.38155 123.715 1745918.615 184.232 4859.86 137 29.3441
7.703 7823.98 2540.21 0.32466 86.8018 1102370.5305 103.857 3482.71 26 35.4641
15.33 7222.2 1750.77 0.24241 64.1083 1014223.8541 89.4892 3296.03 9 37.8068
3.374 13484.5 4558.04 0.33802 161.142 1854907.9044 197.073 5119.61 69 26.769
18.733 10474.1 3832.64 0.36591 75.3607 1444949.0902 144.93 4488.04 65 32.7866
16.594 14694.1 5825.14 0.39642 183.938 2008067.1278 290.727 4588.12 133 28.4703
2.242 3960.46 1084.65 0.27386 31.8501 538428.5344 45.4952 1390.95 17 44.14
2.144 5190.51 1107.88 0.21344 45.9636 730341.2905 63.3473 2763.65 15 41.5043
20.544 4751.31 1378.21 0.29006 45.1035 684940.5007 59.8135 2310.36 35 46.5464
3.967 10209.3 3160.08 0.30952 118.194 1436839.663 161.018 4254.72 50 33.5394
10.546 7438.65 2839.6 0.38173 90.2165 1040950.2207 115.345 3520.24 45 38.1437
3.389 12460.3 3141.37 0.25211 125.108 1683679.3187 155.939 4079.24 227 32.123
1.637 15043.3 2920.75 0.19415 185.285 2104156.7683 226.235 4699.67 32 46.5464
3.432 7864.63 2403.12 0.30556 73.2899 1065478.7375 112.935 3436.9 73 35.8993
16.469 9450.93 2527.1 0.26739 94.7967 1275612.0983 92.5851 4103.1 31 35.6381
11.205 3775.79 1176.86 0.31168 33.9678 514195.1758 48.5693 1339.44 24 44.6292
3.718 10427.8 3225.76 0.30934 105.113 1489322.4934 144.491 4364.02 70 31.8603
2.647 4734.81 850.11 0.17954 45.421 640811.0658 65.8734 2710.2 13 42.9014
15.322 7135.54 2541.89 0.35622 60.2668 924634.13 113.87 3540.6 5 38.0204
12.219 7736.42 2034.33 0.26295 76.6182 1054065.0458 98.6437 3529.28 37 35.4491
14.358 8049.68 1725.84 0.21439 83.5447 1145734.927 109.946 3771.37 100 30.367
0 11734.9 2274.54 0.19382 135.096 1588899.2254 194.426 4791.5 29 29.826
1.525 5094.89 1978.2 0.38827 34.2611 722154.3795 64.6469 2605.56 38 44.1626
2.511 16584.3 5343.16 0.32218 212.163 2188857.0968 255.352 6190.27 255 21.4536
1.764 12709.1 2461.47 0.19367 160.595 1726253.6612 210.505 4686.85 96 29.0729
14.619 5943.87 1815.53 0.30544 57.1935 847872.5038 74.3096 2498.79 68 41.6172
5.877 7926.67 2113.08 0.26657 66.0357 1152789.4975 81.1029 2685.4 34 39.578
9.641 13872.6 4454.72 0.32111 151.724 1898479.6178 210.556 5160.83 14 30.6207
2.41 4964.18 1508.44 0.30386 44.3075 690984.619 60.4533 1872.73 19 43.8882
0.954 11313.6 2364.57 0.209 146.726 1597840.6642 177.782 4613.87 54 29.9249
17.357 9086.77 3286.76 0.3617 90.5828 1204900.9584 146.939 4037.27 26 34.0115
15.728 8871.36 2555.33 0.28804 57.7497 1238499.9909 102.097 3534.01 61 38.2055
1.317 8037.48 2065.53 0.25698 86.7527 1133441.8368 108.055 3977.59 50 35.2221
17.107 15358.5 3988.62 0.2597 169.181 2157959.2394 206.034 5492.76 239 23.5501
4.281 10590.2 3370.5 0.31826 131.392 1449738.596 154.27 4894.81 72 29.2047
2.461 9497.4 2588.91 0.27259 105.995 1349400.994 142.347 4229.35 44 33.4105
4.831 8164.44 2611.17 0.31982 75.6317 1122747.0921 116.504 3956.75 88 37.756
2.155 11158.3 2964.38 0.26566 132.539 1531101.4725 161.551 4422.34 91 31.4741
12.192 4815.29 1190.8 0.24729 39.2321 641896.1502 66.9865 1607.33 18 43.8308
17.878 10392.1 3960.06 0.38106 76.9708 1441601.7037 150.915 4699.98 107 31.6804
1.922 16876.8 5668.04 0.33584 199.524 2354428.7648 250.87 5401.31 170 24.1582
16.925 9163.4 2920.8 0.31874 107.115 1273030.4895 137.449 3927.66 107 29.2438
2.658 10408.3 3083.42 0.29624 95.0473 1412832.273 154.422 3972.46 121 33.273
1.32 21222.6 5728.29 0.26991 298.35 2882912.1641 309.143 6594.97 287 18.722
2.85 8973.75 2135.2 0.23793 98.5881 1271341.8523 118.453 3792.17 50 35.1671
2.715 6761.26 1809.35 0.2676 71.0623 891024.3626 86.8208 3808.73 57 36.5463
4.128 24495.5 8356.32 0.34113 313.26 3404690.5231 404.459 6782.26 125 16.1494
1.832 3494.67 899.72 0.25745 36.8341 497195.5328 41.7431 1777.51 12 44.5346
13.302 7355.12 2707.13 0.36806 63.0117 948938.9947 121.052 2963.5 35 39.4967
19.999 14450.5 5926.18 0.4101 169.64 2022849.92 258.978 4442.16 120 29.1832
2.38 8660.54 2279.81 0.26324 97.6565 1184342.853 118.288 3813.74 25 34.3113
2.051 8098.16 2150.47 0.26555 81.6456 1146025.9645 103.144 3915.77 39 34.7866
3.896 6322.73 1358.44 0.21485 55.315 852304.9711 77.2169 2453.63 33 41.2423
1.776 6579.89 959.49 0.14582 47.5815 932241.7573 78.7703 2740.37 1 42.4894
2.061 9160.38 2081.05 0.22717 108.88 1250751.3365 143.034 4022.53 39 34.169
1.952 8507 2578.09 0.30305 95.7775 1165224.7473 145.279 3258.87 8 36.5875
11.51 5509.69 1065.36 0.19336 39.4443 746670.4395 83.2755 3066.51 26 41.9517
2.564 9701.53 3646.99 0.37591 137.074 1280327.6676 178.391 4419.86 168 30.8024
0.98 12158.7 2562.38 0.21074 139.217 1722766.1059 184.288 4613.63 52 29.925
7.55 4832.18 1465.99 0.30338 45.2132 622989.3254 72.0783 2244.95 28 42.6391
13.273 13506.7 5293.45 0.39191 167.675 1915482.8762 270.346 4674.68 59 28.3044
19.301 12939.4 5537.67 0.42796 127.637 1804442.0364 202.223 4868.45 116 29.747
15.9 8755.62 2698.75 0.30823 60.6469 1236120.5208 112.997 3209.83 9 36.3886
3.086 11884.3 3131.06 0.26346 148.029 1685517.6881 158.265 4148.23 133 32.1115
16.357 8210.02 1611.32 0.19626 60.6193 1167968.4124 78.8416 3659.87 25 38.8909
3.078 9533.01 1897.41 0.19903 128.52 1286292.8354 166.262 3622.1 82 34.9221
15.183 4962.97 1180.13 0.23778 41.237 678392.9441 74.8958 2530.07 20 37.6793
3.56 14268.4 4618.36 0.32367 151.371 2018153.9605 243.433 4684.95 70 28.7264
3.532 4920.77 1179.74 0.23974 40.4222 680449.96 65.1283 2811.21 26 41.6292
12.194 6578.48 2388.93 0.36314 50.3839 905097.2667 105.173 3003.27 77 39.2559
1.431 7248.16 2074.22 0.28617 81.5009 978444.7317 111.356 3099.83 81 38.8531
2.072 15007.2 5421.62 0.36126 183.088 2108922.9282 250.835 4416.38 39 26.8353
7.886 15848.4 4465.19 0.28174 189.928 2210955.0965 233.895 4733.77 51 27.3018
0.68 4957.13 933.17 0.18824 45.0853 713811.7004 57.7576 2183.43 81 42.8516
3.429 6411.31 2061.5 0.32154 44.7148 831886.2766 90.1626 3011.5 55 38.9741
2.521 9178.11 3337.5 0.36363 95.6747 1236737.0924 131.689 3357.87 80 38.0875
3.224 9230.74 1733.01 0.18774 88.3928 1285460.5103 113.341 4485.47 34 35.4964
2.227 11195.3 3471.84 0.31011 118.457 1560690.8071 180.286 4144.56 43 31.6939
2.799 22055.2 8153.07 0.36966 144.486 3109213.3782 344.815 11932.72 102 28.3071
8.786 9384.02 2445.68 0.26062 96.4208 1278923.2439 93.3419 4285.19 15 33.9001
12.511 10441.2 3399.79 0.32561 96.1944 1435855.8626 128.323 4007.86 97 33.7889
14.381 11300.3 3074.53 0.27207 105.537 1559398.1369 137.02 4085.65 9 33.2457
16.445 13588.5 3818.61 0.28101 138.891 1887157.6272 197.091 3981.48 43 32.7036
16.894 10721.2 2757.61 0.25721 113.554 1544027.9099 147.821 4264.12 95 31.3629
12.49 8291.71 3043.89 0.3671 70.8515 1167724.4085 132.045 3835.69 15 38.1932
7.099 3602.45 1342.62 0.37269 24.5773 487821.6286 45.5028 1446.26 9 45.2074
3.845 5930.43 1035.77 0.17465 53.1342 822508.9052 64.4706 2969.31 20 40.3072
3.059 6837.26 2093.73 0.30622 64.8806 865812.7917 99.2821 3066.16 31 40.0015
1.47 13734.4 3442.51 0.25064 191.989 1873864.0487 215.207 4579.28 175 29.0597
12.498 8225.59 1932.51 0.23493 72.502 1131341.3383 91.5449 3360.63 30 37.0405
15.691 6886.68 2364.92 0.3434 63.4743 956661.8792 95.3852 3683.83 70 33.7558
14.133 4937.62 2137.22 0.43284 59.6226 655627.2025 98.9699 2837.18 65 41.6761
14.52 7883.39 2247.5 0.28509 95.0942 1065973.0209 133.243 3764.3 70 36.5951
12.576 8280.35 2778.47 0.33554 98.7324 1167294.5423 115.859 3047.01 64 32.9564
6.655 4848.11 1024.69 0.21135 48.9198 615234.7872 59.4068 1992.44 30 43.3669
10.905 11912.5 3728.86 0.31302 142.156 1653548.9227 184.079 4359.53 64 32.3207
9.043 6372.23 1672.9 0.26252 69.8747 895478.4009 74.1544 2853.28 77 39.4117
4.985 17513.1 6681.98 0.38154 152.553 2383999.149 312.992 11474.68 57 32.8677
3.254 9420.84 2927.87 0.31078 105.087 1302463.9733 128.853 3693.54 21 34.6244
5.693 15694.1 5880.94 0.37472 158.859 2163490.7889 256.946 5873.52 89 25.4236
3.503 8897.19 2685.45 0.30183 114.692 1214758.6938 140.651 4120.87 126 32.4829
15.192 15967.6 5687.77 0.3562 108.084 2298635.9154 216.132 5974.31 71 29.4555
0 14701.6 3825.94 0.26023 160.604 1971438.0187 225.315 5468.7 65 46.5464
2.116 10892 2303 0.21143 133.573 1493505.9111 148.256 4417.61 88 31.2882
13.647 6118.13 1365.26 0.22314 54.8858 840824.6947 70.8236 2654.26 24 39.9007
13.595 4690.15 1820.76 0.3882 42.9229 632477.6428 76.791 1696.41 20 43.5202
1.818 5646.04 1979.11 0.35053 70.1156 782106.8282 83.5887 3055.31 36 40.1175
7.674 6730.22 2713.61 0.40319 57.8314 932178.7901 90.3495 2891.73 50 39.9921
5.822 4598.95 1482.05 0.32225 35.8995 622778.0255 56.66 1519.24 19 44.2716
2.216 16076.1 3450.21 0.21461 197.064 2269134.2904 260.468 5563.68 82 23.5846
1.257 14780.9 4725.74 0.31971 170.726 2059948.1274 253.834 5350.75 162 24.5958
1.241 10253 2390.36 0.23313 124.946 1431195.2757 156.852 4584.67 73 30.2421
17.458 12830.9 6089.21 0.47457 176.253 1736996.9282 280.143 4480.76 158 31.0492
2.036 9011.13 2090.07 0.23194 81.3115 1277311.9124 114.485 4693.74 30 33.1083
17.886 8216.65 2843.44 0.34605 62.4644 1161068.1163 113.161 4600.53 59 35.8808
16.525 9088.17 3420.07 0.37632 97.4118 1296800.263 134.271 3655.18 126 34.7963
1.38 10793.1 2890.34 0.26779 127.579 1516092.0579 174.234 4260.71 49 32.3734
18.281 10476.3 3700.1 0.35318 107.08 1538022.2623 155.751 4319.6 76 31.2357
2.014 16811.7 5444.26 0.32383 179.995 2345744.7075 274.588 5431.58 161 24.2655
8.138 19085.4 5078.82 0.26611 185.74 2710838.3817 259.242 5815.93 238 22.0513
13.577 9430.61 2817.51 0.29876 77.0925 1294023.0595 138.726 3994.06 64 32.9916
0.879 10965.1 2272.85 0.20728 142.827 1552112.491 177.882 4534.7 49 30.484
4.538 12969.5 4499.38 0.34692 136.569 1794164.0492 182.353 4534.12 48 31.4502
12.899 6780.01 1665.42 0.24563 61.4626 977168.6486 78.2879 3483.99 60 37.1649
4.45 3929.3 1040.3 0.26475 37.1128 532866.3272 50.0968 1337.3 14 44.91
14.163 8408.98 2369.12 0.28173 89.3125 1147646.5771 110.842 3806.03 30 36.1592
0.784 7275.59 2392.96 0.3289 76.1165 995589.0664 117.702 3078.95 74 39.145
18.338 17674.6 6373.57 0.3606 192.24 2390129.5758 255.029 5279.73 83 24.7891
5.91 14332.9 5899.14 0.41158 190.865 1911592.6714 277.289 4952.14 83 26.8564
10.015 5081.95 1833.24 0.36073 41.029 686281.9339 74.1005 3296.8 12 41.129
4.556 7642.87 2088.93 0.27331 84.718 1096170.9893 110.426 3476.87 23 37.3618
2.389 8265.5 1709.05 0.20676 82.1817 1158002.8284 97.6061 3959.57 43 35.1478
0.953 22002.3 5163.28 0.23467 322.261 3018789.4173 394.225 6221.02 163 19.8231
19.569 14302.6 4511.76 0.31545 119.353 2093223.4594 179.526 4177.8 154 33.8155
17.395 19005.2 7309.3 0.38459 162.239 2591834.0737 340.873 6390.41 189 31.2554
11.649 6180.04 2057.48 0.33292 61.92 847537.1786 93.3159 3077.63 23 39.4057
1.245 5810.25 1216.6 0.20938 58.2589 805167.8868 79.4416 2663.54 24 40.3284
3.738 7894.27 2223.73 0.28168 67.9298 1053008.1926 104.381 3157.06 22 38.3103
1.266 11553.2 2826.76 0.24467 158.293 1612599.1363 176.184 4586.24 44 30.1003
2.861 14799.4 3826.47 0.25855 203.153 2065932.0676 255.4 4966.9 134 26.7019
5.778 11430.1 2985 0.26115 113.629 1600321.2572 152.945 4494.95 76 32.4954
3.297 5876.46 1261.76 0.21471 62.202 798689.1979 82.055 2976.34 28 38.2382
2.102 6635.63 2454.89 0.36995 77.8431 900811.816 100.223 3226.25 60 38.7453
4.239 5077.64 1480.21 0.29151 54.3005 679794.6998 81.511 2631.86 29 41.3202
10.261 4401.99 1282.09 0.29125 24.0421 609757.924 55.9268 1952.08 22 43.3289
4.738 20980.8 6646.1 0.31677 247.301 2894032.2917 345.6 5942.14 206 22.025
2.499 11931.5 2904 0.24338 129.484 1619158.8797 152.061 3962.23 227 32.4449
1.99 5941.55 814.82 0.13713 48.7071 846988.8017 69.8835 2686.85 3 42.1556
16.169 7614.73 2471.05 0.3245 74.8844 1039017.9754 112.713 3377.1 51 37.3952
6.552 13862.6 5734.87 0.41369 201.09 1838386.922 265.369 4825.29 90 26.428
14.552 7385.18 2131.66 0.28864 58.9038 1029503.4099 89.2961 3165.93 13 39.2576
18.305 12760.8 4611.61 0.36138 107.268 1774922.8165 180.233 4417.62 22 32.0252
10.005 5585.76 2398.16 0.42933 62.151 733141.3495 106.119 3096.85 50 39.3261
11.641 7803.99 2187.22 0.28026 84.7481 1069635.4201 104.203 3308.21 54 32.1628
2.216 4927.92 1447.63 0.29376 36.8497 699504.305 58.8175 2530.55 10 44.6456
3.241 14147.6 3293.33 0.23278 199.608 1956392.2265 248.854 4935.07 125 26.5857
0.769 5730.87 784.01 0.1368 50.9233 812823.882 66.5458 2718.09 1 42.2444
1.842 6044.03 1450.11 0.23992 68.3954 853036.4107 76.9187 3046.28 9 39.0679
1.815 9486.49 2255.46 0.23775 104.264 1294271.6671 145.669 4027.73 37 33.978
12.122 7921.2 2689.54 0.33953 56.0273 1081822.7554 108.518 3216.09 50 38.2716
3.204 9374.31 2339.77 0.24959 95.8031 1312655.1236 131.343 3765.52 18 34.067
0.967 22769.3 5801.73 0.2548 318.941 3117727.4369 413.76 6242.72 157 19.7263
5.397 4288.92 953.54 0.22232 42.3353 541631.378 58.6559 2036.14 32 43.6369
3.222 12314.1 3268.11 0.26539 159.124 1724368.4274 193.16 4801.94 65 28.4878
1.588 7417.15 1768.56 0.23844 75.1165 1082034.2892 88.0744 3025.66 11 37.1589
14.465 5605.47 1942.77 0.34658 46.1576 725225.0823 94.7968 1976.23 43 42.1304
2.225 8744.56 2225.77 0.25453 80.7749 1237125.9268 110.812 4030.59 38 34.7233
16.442 7415.31 2985.72 0.40264 72.8167 1024553.8579 123.865 3709.18 80 36.6226
10.579 6804.77 1916.99 0.28171 56.0653 930773.8248 84.2472 2719.18 23 40.4255
10.394 11867.8 3763.2 0.31709 158.416 1663516.5069 197.512 4532.83 140 30.4115
2.563 5140.61 1453.15 0.28268 41.6746 739196.402 64.9003 2323.03 19 40.3015
9.957 9456.79 2581.15 0.27294 94.7218 1342192.6104 130.705 3751.85 31 35.7001
17.26 5009.58 1726.4 0.34461 51.6233 672039.1121 79.6047 2871.19 40 40.88
10.217 7101.15 1809.54 0.25482 53.084 995051.7262 75.6708 3549.44 20 38.197
18.65 11126.5 4303.6 0.38678 94.6886 1565219.6293 164.998 4015.23 107 33.8503
4.28 8170.29 2931.53 0.3588 67.7825 1146585.3205 109.053 4709.56 66 34.836
14.924 13995.7 3636.76 0.25984 130.33 1947184.4363 173.289 4975.7 152 28.552
1.346 6344.6 2277.55 0.35897 78.0883 863743.0294 93.1583 3180.04 58 38.457
1.659 5468.13 1442.29 0.26376 46.6424 761667.1366 70.222 3090.48 16 40.3668
0.867 8892.36 2109.42 0.23721 96.5536 1253440.6335 144.574 3527.62 14 29.9843
1.932 8256.37 2067.44 0.2504 84.7764 1166526.3868 110.037 3827.62 3 34.5648
0.787 11308.4 2677.93 0.2368 136.535 1578226.7735 170.601 4723.08 175 28.5112
2.132 13263.2 3455.99 0.26056 159.869 1858764.6056 217.023 4964.95 197 28.1017
16.483 6271.98 1368.33 0.21816 67.8232 884820.4494 80.7229 2721.38 35 46.5464
5.339 7041.81 2425.81 0.34448 62.3732 968507.9368 96.9814 2875.5 47 39.6838
18.168 8977.23 3115.25 0.34701 89.1012 1263834.4869 136.947 4179.71 88 34.4568
2.156 8647.05 2600.18 0.3007 93.0759 1221221.5981 122.994 3562.84 87 36.7727
2.099 8353.61 3144.9 0.37647 82.9932 1114584.8105 144.233 3663.23 55 36.1476
13.094 5293.2 1998.42 0.37754 49.8143 734325.7314 87.8412 2286.28 81 42.5742
1.806 7095.6 2069.98 0.29172 67.809 1000592.9252 88.0915 3594.15 32 37.9835
14.988 12500.9 3935.29 0.3148 124.175 1781361.7846 179.924 4416.85 89 31.1546
17.08 11169.8 5137.09 0.4599 106.869 1442478.5792 195.071 4005.17 102 35.1328
17.698 18411.2 6344.54 0.3446 160.58 2595637.7044 276.347 5956.18 197 23.6409
13.532 6537 2505.36 0.38325 51.9669 902762.7505 102.943 2542.39 75 40.6106
4.339 10628.6 3366.16 0.3167 104.981 1482526.5624 152.746 4396.75 16 32.6413
7.228 13775.4 4488.26 0.32581 84.1139 1847518.9699 205.725 4448.09 113 30.2643
2.005 9623.14 2204.52 0.22908 109.758 1342643.5551 125.495 4203.68 56 34.2021
1.717 7789.69 1998.98 0.25661 65.9842 1078488.3386 101.451 3414.59 86 36.7803
2.349 12799.6 3609.86 0.28202 143.884 1721854.6729 180.551 4702.1 58 28.7915
12.19 11965.2 3296.33 0.27549 101.27 1651603.0755 151.03 4672.67 85 31.2347
2.009 7176.11 1868.41 0.26036 69.2462 1016686.6039 86.2173 3705.98 29 37.6718
7.23 8049.45 2541.39 0.31572 67.6108 1136887.5391 93.9427 3317.38 25 37.4372
2.786 15843 3770.44 0.23798 192.129 2090605.1895 256.49 5154.08 172 26.1828
14.405 9964.71 3227.84 0.32392 68.3477 1395133.4511 133.25 3821.9 13 35.6173
15.993 9412.15 4214.85 0.4478 80.6141 1246613.1793 151.27 3700.72 31 38.0366
4.835 9224.61 3380.26 0.36643 79.5171 1254603.5468 128.14 3886.33 108 38.4478
1.592 13969 3944.7 0.28238 166.787 1948262.5286 234.732 4432.5 82 30.0609
2.239 13951.4 3824.43 0.27412 201.367 1910370.9354 204.343 4577.64 164 28.8071
4.801 10943.8 4170.99 0.38112 111.175 1534911.7492 170.794 4473.59 65 32.3279
0.977 6948.88 2864.89 0.41228 64.0954 1030706.8469 94.905 3213.64 34 38.9668
3.661 7213.94 1891.45 0.26219 65.0778 1002460.0166 96.4472 3164.18 83 37.6916
12.568 6814.73 2043.78 0.2999 90.0889 966983.4622 99.6286 3428.54 27 37.1642
1.826 8373.69 2090.92 0.2497 83.6434 1132996.3578 114.839 3730.08 33 35.4235
2.849 12245.6 3190.65 0.26055 161.814 1693064.0198 201.663 4855.16 65 46.5464
18.325 14730.3 5175.98 0.35138 160.637 2086293.4559 192.758 5319.17 52 28.1108
4.93 13911.3 5003.37 0.35966 158.958 1904076.6638 217.966 4976.17 79 27.7182
5.299 8561.45 1903.81 0.22237 97.6337 1216050.5724 130.049 3823.35 43 32.94
20.544 7831.99 2627.73 0.33551 65.7386 1121251.5696 97.6702 4207.93 36 35.844
1.593 8782.08 2675.05 0.3046 97.3277 1205305.8466 145.627 3281.45 11 36.4946
3.737 9953.88 3767.14 0.37845 90.5202 1391324.4507 151.72 3402.74 29 38.7261
2.207 10030.8 3054.47 0.3045 124.718 1343847.0417 164.608 3960.05 38 33.7337
3.064 14561.2 4011.22 0.27547 175.173 2044023.7791 231.361 4507.75 14 29.3594
6.743 7576.06 2108 0.27824 62.4062 1040309.8007 101.083 3196.87 49 37.422
2.955 11461.2 3064.39 0.26737 145.322 1631317.1249 159.806 4124.92 119 32.4405
3.086 13625.2 3010.86 0.22097 171.125 1853777.4011 209.559 4716.13 25 28.7758
1.883 14266.2 3170.36 0.22222 178.533 1996317.1236 190.272 4071.51 138 32.0918
14.301 7120.23 2372 0.33313 53.5732 982901.6768 97.2311 3785.78 22 37.2802
3.516 4726.95 1060.51 0.22435 43.8742 667706.623 64.1493 2687.85 13 41.7206
1.692 15115.1 4707.42 0.31143 207.485 2095522.2731 257.914 5320.38 285 24.7674
16.813 8899.29 2215.3 0.24892 83.4919 1262618.9342 94.2358 4129.86 75 33.6749
3.195 9893.62 2753 0.27826 108.561 1415169.2286 128.871 3781.27 63 35.1795
3.995 13651.8 3582.35 0.2624 129.799 1935943.9595 165.648 4778.11 54 29.2043
10.943 4917.17 1948.52 0.39626 44.104 720178.5224 71.027 2364.1 42 42.9827
15.471 7777.21 3048.71 0.392 88.4937 1099862.8418 127.143 3087.72 34 37.67
12.812 4980.73 1531.13 0.30741 40.5652 656756.8206 73.2352 2667.91 18 42.9993
1.81 7574.4 1402.61 0.18517 77.7885 1074177.7566 88.5252 3791.71 16 35.6879
13.979 7134.09 2137.51 0.29961 64.8944 940763.835 96.2909 3812.95 59 39.6458
1.515 8514.9 2610.64 0.30659 100.157 1176209.8409 142.464 3238.72 17 36.6998
2.722 10829.9 2587.32 0.2389 113.408 1474733.6428 178.425 3995.52 75 32.4786
3.566 17995.3 6408.23 0.3561 211.243 2550051.3653 311.197 5779.1 99 25.0003
2.909 15069.2 5115.83 0.33948 184.015 1978475.8123 227.959 4337.34 109 30.4768
2.5 9081.47 2760.53 0.30397 91.1258 1255689.4036 131.835 3809.66 46 35.217
2.044 13709.8 4373.85 0.31903 167.452 1897607.1436 213.416 5166.96 192 27.6107
9.453 6441.86 2327.01 0.36123 46.7254 902333.7123 80.5954 2631.58 26 40.9493
4.46 10842.6 4079.6 0.37625 120.032 1448655.9465 198.82 3949.42 34 30.7121
14.339 6912.11 2683.4 0.38821 55.1699 1002325.8075 93.6563 4056.71 50 36.8293
14.833 7534.54 2340.24 0.3106 59.9447 1036134.0667 102.514 3674.76 53 36.8389
4.05 6188.27 1781.82 0.28793 70.1439 864838.3648 82.8694 3036.94 38 39.9296
4.934 12834.3 3791.52 0.29542 169.292 1760730.3901 222.025 4709.36 113 27.9531
15.255 7178.75 1894.53 0.2639 64.1227 1010800.9785 98.2906 3271.56 21 35.3455
2.752 9055.49 2612.27 0.28847 80.9065 1271261.4015 111.042 4244.52 59 34.4652
10.537 7195.94 2362.98 0.32837 49.9918 973107.1377 110.56 2644.08 29 39.7815
2.852 9560.99 2478.68 0.25924 100.369 1331984.5094 129.604 4006.43 20 34.6248
3.039 11177.4 3086.9 0.27617 145.523 1574902.7529 152.771 4112.41 132 32.1389
17.69 10218.4 3418.35 0.33452 79.1697 1447731.9245 144.202 4550.56 56 35.9516
12.39 8998.73 3274.19 0.36385 70.3815 1256792.6024 122.494 3569.05 51 37.1761
1.943 16016.6 3100.78 0.19359 170.633 2234723.4171 210.99 4084.79 175 31.9757
10.214 6509.89 1727.8 0.26541 62.2693 877850.2966 106.035 3157.56 38 38.8139
1.908 9386.3 3067.08 0.32676 100.65 1317062.3572 138.131 4210.8 40 34.2605
2.583 16081.5 5605.98 0.34859 191.812 2226112.2898 234.541 5239.69 202 27.9507
1.796 10169.9 2954.04 0.29046 115.743 1454413.7768 136.27 3832.97 47 35.0156
1.555 10247.4 2909.01 0.28387 104.257 1420026.0836 143.407 3775.15 123 35.4803
12.248 6797.59 1671.14 0.24584 68.7231 949606.9453 82.7314 2798.99 20 40.568
1.931 11402.8 2174.53 0.1907 147.116 1596915.3813 174.892 4612.13 160 29.1971
15.48 8598.71 3861.8 0.44911 67.5708 1218522.9187 130.239 3293.1 47 38.4082
4.232 15377.2 4100.31 0.26664 239.758 2107483.6047 269.995 4736.59 298 27.7799
2.285 4968.14 1037.66 0.20886 43.1514 677412.7603 66.1669 2679.98 11 42.98
1.73 4000.26 1087.13 0.27176 33.732 569494.3892 46.039 1773.46 12 44.4892
17.497 17127.9 6001.43 0.35038 177.493 2356056.5262 274.371 5172.79 74 26.4049
2.82 9138.71 2028.46 0.22196 100.345 1296590.8669 118.657 3850.14 68 35.2167
11.432 7732.84 1452.17 0.18779 63.7696 1057080.4375 82.4662 2912.28 22 39.5665
2.895 4984.44 825.42 0.16559 40.8415 698314.4139 49.3854 2317.72 19 42.7488
20.863 13438.8 4915.9 0.36579 99.9218 1934547.1804 205.087 5527.72 71 28.8457
2.276 10453.5 4105.6 0.39274 109.671 1439392.805 174.561 5494.89 65 32.2169
4.264 7602.54 2847.68 0.37456 72.5688 1037124.2807 101.656 3516.91 36 40.6716
14.207 10131.6 4110.64 0.40572 94.1619 1369527.7325 138.132 4603.62 58 35.1253
1.948 8849.53 2411.54 0.2725 80.2369 1233092.538 107.861 4254.74 61 34.1287
2.378 14746.5 3541.95 0.24018 211.598 2022454.5851 248.651 5089.8 155 25.4817
6.224 6909.61 2011.69 0.29114 59.2573 918393.1253 91.1641 3342.71 31 38.7748
1.928 7344.4 1507.17 0.20521 74.2814 1063281.3296 86.3166 3040.32 26 38.2576
18.414 8811.14 3112 0.35318 105.068 1204384.4143 127.214 3994.57 117 35.3012
1.822 10677.5 3052.27 0.28585 120.375 1441166.8614 166.307 3996.91 28 33.8044
4.76 13492.6 3881.24 0.28765 172.648 1887124.5555 217.648 4783.19 113 28.6343
17.047 12776.1 4850.81 0.37967 119.536 1803228.3967 200.011 5016.42 97 32.4517
1.429 9549.18 3675.59 0.38491 133.222 1267060.207 181.724 4423.94 177 31.0456
4.912 8216.58 2555.13 0.31097 92.7123 1111658.3197 136.287 3940.4 41 35.4852
14.02 6619.06 2120.75 0.3204 64.2253 954048.318 85.7783 3683.91 75 38.0957
2.144 3905.02 1031.36 0.26411 34.1178 555746.5984 47.8974 1780.9 7 44.4853
10.562 7461.32 2667.75 0.35754 89.2998 1037835.9644 107.13 3700.7 27 36.2792
2.597 16737.7 5283.4 0.31565 188.829 2261566.6792 266.072 5380.14 205 24.5835
11.913 4108.96 1331.52 0.32405 34.0818 556816.574 48.5724 1420.71 32 44.2408
17.27 7973.55 3058.98 0.38364 92.4566 1138297.5563 121.058 3440.76 30 34.4904
3.128 10239.9 2882.69 0.28151 97.0657 1430083.9869 131.715 3573.34 27 35.8978
6.727 16861.1 5851.6 0.34704 185.723 2327032.2921 266.519 5996.76 105 24.3893
9.473 8115.24 3111.91 0.38346 65.8445 1148409.652 104.904 2678.42 63 39.1393
2.354 6848.31 1969.97 0.28765 89.4002 960679.4587 108.884 3456.91 91 37.5325
16.333 7971.21 2803.35 0.35168 37.8243 1082808.9564 98.369 3323.83 72 36.7515
3.551 8991.47 2362.21 0.26271 114.63 1252000.1652 127.402 3718.72 56 35.4832
12.535 7911.67 2167.43 0.27395 67.3811 1059543.3931 110.743 3382.18 51 38.2577
11.419 4953.05 1575.15 0.31801 38.0893 686256.1957 64.5334 2033.63 23 41.9914
14.846 7321.13 3182.13 0.43465 67.7578 1023362.8488 123.612 3182.72 68 38.2547
0.543 8128.22 2065.11 0.25406 102.048 1132897.3284 128.465 3253.72 5 37.0608
1.024 8110.4 1632.33 0.20126 71.9026 1161707.9351 107.513 4057.08 101 34.8833
19.179 11519.7 3678.09 0.31928 68.379 1544162.009 179.792 9268.27 56 35.1693
12.009 6195.03 2100.24 0.33902 51.766 861958.5901 84.8521 2499.22 88 40.829
14.034 6879.9 2161.31 0.31414 58.8293 981088.9969 86.4543 2600.35 66 41.2842
12.312 4837.79 1327.49 0.2744 40.9513 667402.3639 67.7433 1493.47 14 43.5276
16.905 8345.15 3056.03 0.3662 67.9636 1225673.3768 110.829 3203.95 59 38.6338
1.955 12284.5 3169.07 0.25797 155.959 1703823.7119 199.168 4194.91 69 31.7219
16.77 8456.07 2153.83 0.2547 70.7757 1145554.8532 107.582 4249.31 85 31.4108
2.006 8950.76 2489.37 0.27811 87.1854 1269639.0256 119.308 3942.6 11 34.1609
1.844 12432.6 3074.6 0.2473 148.399 1729330.526 194.166 4194.56 67 29.6884
18.54 13958.6 5785.73 0.41449 94.8738 1960013.7191 209.266 4528.22 111 31.4302
19.681 12087.9 4232.21 0.35011 115.086 1714910.0547 185.065 4732.79 164 30.0613
3.088 7813.17 1733.89 0.22191 85.9553 1044663.7065 118.988 3568.05 39 36.4395
6.912 22365.3 8005.22 0.35793 307.191 2923076.764 304.557 8614.18 199 23.6809
2.321 9158.59 2675.2 0.29209 87.2376 1271930.5946 132.669 3916.59 2 35.4877
4.57 8652.2 2877.4 0.33256 68.1075 1156396.9932 131.659 5071.56 65 35.436
10.157 12303.8 5275.74 0.42878 101.347 1735405.1253 181.841 5510.43 48 32.091
3.422 12158.4 3631.71 0.29869 132.223 1719861.5538 174.254 4416.54 77 29.3956
2.152 4319.47 844.4 0.19548 39.8435 573065.1797 65.425 2570.32 12 43.4484
16.529 11959.6 2745.42 0.22955 110.176 1699186.1755 154.404 4571.3 87 31.7837
1.611 13692 3664.12 0.26761 192.966 1877160.3123 220.066 4575.84 178 29.0318
4.262 9399.76 3245.91 0.34531 96.8183 1330173.5736 131.863 4058.57 95 31.7817
2.987 10861.8 3237.88 0.29809 130.314 1555020.2405 177.567 4441.75 43 31.7747
2.958 5689.84 1383.59 0.24316 68.4937 795330.3054 75.4115 3066.74 13 38.7444
19.131 15332.2 4797.78 0.31292 151.141 2053464.4135 262.974 5079.74 103 24.6984
19.233 11299.1 3202.08 0.28339 113.226 1602460.9675 151.283 3990.27 178 33.3485
19.736 16976.8 4845.04 0.28539 175.798 2459184.311 254.153 5141.11 212 22.2121
3.128 13893.2 3359.42 0.2418 184.885 1965508.3796 226.5 4818.99 81 27.8205
20.574 11703.5 5528.55 0.47238 163.704 1615913.5236 240.568 4807.87 195 29.1442
2.791 4890.35 1336.27 0.27324 45.919 681366.1877 54.0148 1961.64 12 43.6499
10.219 9994.67 3000.3 0.30019 117.111 1341468.1495 145.208 4273.88 46 34.4849
19.487 26752.5 10241.3 0.38281 206.369 3644893.8114 392.422 16742.07 105 25.6487
1.712 15497.2 4868.61 0.31416 182.816 2164243.146 255.42 5427.07 167 24.3336
2.26 7294.71 2615.47 0.35854 79.7514 1010145.9365 106.955 3801.79 35 35.9858
6.821 13612.1 5235.58 0.38462 185.322 1799753.3161 260.661 4894.25 83 23.8326
13.936 6458.36 2087.55 0.32323 56.2035 869202.0702 91.5909 2689.05 19 40.5041
5.84 8780.47 2598.96 0.29599 98.588 1238322.2471 139.122 3482.98 113 36.3035
2.746 14541.9 4123.6 0.28356 142.802 2037725.5541 189.6 4807.26 70 28.5188
3.592 6098.65 941.76 0.15442 56.275 850926.7909 59.7691 3051.71 19 39.6299
8.348 5876.17 1910.75 0.32516 54.8898 812113.0277 79.4903 3122.03 10 39.7338
1.255 6291.45 1396.61 0.22198 54.9148 868703.6736 84.1784 2843.14 17 40.1061
1.583 6092.14 1418.17 0.23278 57.8529 833251.7055 80.5638 2792.44 18 40.7292
13.135 5391.52 1462.16 0.27119 59.3159 747744.5345 72.2039 2538.06 61 41.726
12.44 7891.29 1929.42 0.24449 73.0472 1083129.8582 96.0955 3553.77 87 35.3299
19.981 17556.8 7476.7 0.42585 130.807 2512581.9749 258.101 6093.86 146 22.4331
4.813 18195.9 4909.5 0.26981 245.583 2510187.9379 292.217 5399.74 230 21.8698
19.064 11696.1 3456 0.29548 108.135 1681328.9718 141.84 4873.62 87 30.1253
1.504 11862.7 2134.5 0.17993 147.269 1674759.183 163.89 4651.11 147 29.7356
13.521 8752.38 2360.92 0.26974 75.0097 1180056.6679 107.353 4181.02 79 33.4061
16.264 6960.32 911.43 0.13094 65.8291 985566.955 72.5753 2900.1 54 35.2198
3.118 8011.88 2955.03 0.36883 78.2002 1090893.6542 105.113 3098.38 103 38.1142
1.815 5621.43 1910.31 0.33982 47.7577 801241.6366 78.8337 2763.75 18 40.8553
2.576 11327.8 2948.02 0.26024 142.283 1545596.1752 183.14 4433.73 47 31.201
2.357 13652.4 3699.89 0.271 191.691 1860648.1071 208.577 4570.19 182 29.0728
3.291 9591.88 2853.93 0.29753 113.796 1334218.2506 155.713 4312.87 66 33.5341
5.633 15718.8 4699.92 0.29899 181.247 2142026.616 226.396 5529.05 70 22.3332
14.859 12900.8 3577.57 0.27731 160.987 1803018.5842 197.646 4821.03 144 24.9662
1.88 9233.4 2242.62 0.24288 117.854 1287697.3733 158.124 3852.71 14 34.2534
13.385 6512.22 2357.29 0.36197 69.4239 873476.2756 112.922 3251.01 45 38.5589
15.06 7320.48 2866.78 0.39161 56.3266 991468.3292 118.365 2647.08 54 40.0389
3.993 6965.39 2619.17 0.37602 63.8655 909279.0517 119.979 2754.38 31 38.8711
2.111 16782.4 3517.83 0.20961 213.304 2369968.8597 250.132 5555.22 92 23.6467
9.911 6803.44 3408.59 0.501 58.2752 947130.5952 117.799 2651.8 42 40.6414
12.189 8529.23 2687.25 0.31506 64.3257 1204903.8663 103.151 3626.04 13 37.4971
12.486 5028.45 2200.68 0.43764 46.4864 728782.8289 74.7953 2478.9 49 42.7955
1.723 15223.1 4217.07 0.27701 192.237 2151698.5051 219.73 5675.84 61 22.9478
2.181 11256 2688.66 0.23886 136.507 1520525.9026 149.456 3635.56 20 46.5464
5.037 14334.6 5058.21 0.35286 168.037 2006563.5403 218.841 5065.79 66 26.9618
6.164 4877.55 1445.85 0.29642 37.0972 669754.176 64.9586 1490.78 11 43.9864
6.289 7703.48 1349.29 0.17515 73.0821 1046302.3784 94.9266 3671.5 23 38.8281
12.597 8903.6 3023.36 0.33956 40.0335 1229034.888 111.161 3536.08 64 36.0975
11.871 7963.59 2025.58 0.25435 88.1034 1084076.6354 103.411 3435.98 36 37.9536
2.035 9016.57 2362.66 0.26203 83.2009 1251296.6255 115.339 4523.92 47 33.331
1.264 15261.5 3837.09 0.25142 179.867 2153026.2001 217.498 5692.01 66 23.0278
16.453 12311.8 3673.26 0.29835 110.562 1702364.2629 149.074 4802.58 89 29.3422
4.597 10172.6 3211.31 0.31568 114.389 1400211.402 148.702 4458.58 95 32.8148
12.64 5953.69 1297.49 0.21793 55.4273 813242.0216 86.1328 2913.12 46 40.6279
12.583 4938.11 1876.27 0.37995 46.6951 716274.2446 68.0343 2502.38 43 43.0885
2.821 15487.5 4571.91 0.2952 167.797 2139460.9972 259.91 4921.76 17 28.3438
17.215 9013.57 2978.73 0.33047 98.6618 1249376.6219 124.36 3402.8 57 31.6247
9.005 5034.9 1688.66 0.33539 30.2628 696267.5824 71.7392 2024.69 10 42.4342
4.878 16356.7 5580.23 0.34115 166.779 2313587.0653 275.757 4810.3 122 29.5582
5.09 6582.12 1754.54 0.26656 59.0826 925240.2113 83.2545 3523.03 49 38.193
12.307 8807.57 3390.43 0.38494 79.9353 1191866.1029 129.603 3946.47 12 35.2947
1.52 21438.8 5900.22 0.27521 294.009 2937565.6676 328.279 6570.75 287 18.6422
4.913 7685.74 3063.71 0.39862 71.4663 1053398.1911 108.885 3334.01 43 40.1391
8.557 8100.93 3523.65 0.43496 65.1182 1150530.4972 105.22 2649.26 75 39.3037
3.82 11881.5 4373.07 0.36805 98.4025 1577149.2833 181.824 5533.44 51 36.0855
5.28 17725.1 4467.63 0.25205 177.656 2601789.8096 231.841 5123.45 86 26.5663
2.334 5408.24 2041.06 0.37739 34.5548 766946.6111 71.4184 2790.8 37 42.6791
14.079 7936.87 2508.43 0.31604 63.8963 1095587.3375 120.152 3769.59 32 36.2459
8.054 5323.63 1534.27 0.28819 46.0409 771767.0559 67.7246 2618.7 43 42.5703
1.215 8590.28 2122.83 0.24712 88.2353 1207457.8916 126.987 4051.01 168 33.4461
8.43 6072.68 1649.56 0.27163 65.7192 878846.0302 67.4132 3732.99 48 39.0057
14.22 19176.2 6638.15 0.34616 220.219 2620723.2382 332.048 5198.53 143 25.2378
1.525 9735.58 2922.02 0.30013 89.2261 1368201.3017 126.138 4734.27 48 32.3435
9.952 15676.4 4090.17 0.26091 188.412 2133885.7391 225.998 5323.22 94 27.9383
1.771 11328.2 3133.3 0.27659 132.12 1573859.689 158.143 4446.78 89 31.5187
0.799 9673.93 2633.92 0.27226 102.358 1323285.9175 152.676 4151.52 76 33.1179
20.294 14358.4 3343.79 0.23288 180.683 1988593.3369 221.921 4577.57 167 31.0688
2.845 7227.69 2401.72 0.33229 64.8022 1044418.6604 96.6428 3196.85 38 39.6844
17 9804.74 3763.64 0.38385 88.3483 1430153.2449 132.129 3522.99 54 36.4116
15.761 12083.8 3006.11 0.24877 126.528 1715343.515 169.6 4643.2 80 29.9489
16.768 8754.33 2305.57 0.26336 76.7507 1206553.8958 104.955 3456.62 59 35.2688
2.177 6825.23 1716.08 0.25143 72.6976 910385.4337 99.3558 3483.28 77 37.6967
7.911 7569.49 2667.83 0.35244 65.7349 1076627.6124 99.5233 4007.6 69 35.2301
3.844 15716.1 4107.77 0.26137 249.442 2171737.3671 272.84 5296.11 205 25.4187
14.246 9790.06 3561.8 0.36381 96.3529 1383370.1713 124.393 3376.91 30 32.091
3.099 10009.9 2936.81 0.29339 112.565 1412359.8874 158.313 4227.43 49 33.3372
8.016 11118.6 4411.23 0.39674 85.7344 1498156.4104 185.531 4140.13 47 36.1386
2.791 14942.3 4826.08 0.32298 176.362 2055396.4064 250.385 4782.78 33 28.4233
9.865 5307.96 1752.47 0.33015 58.2645 741766.4453 78.938 2441.12 66 41.9961
2.62 9875.93 3518.37 0.35625 105.409 1390542.3332 135.48 3684.22 14 35.0138
4.156 16063.1 4449.58 0.277 248.206 2172031.6114 262.494 4851.58 285 27.6263
20.832 9275.43 3752.19 0.40453 75.0291 1312566.2939 123.517 5212.23 38 34.4216
7.78 13916.2 3594.17 0.25827 176.663 1918132.6979 217.748 4987.76 84 25.7278
2.187 8386.68 1860.81 0.22187 83.1233 1182947.0992 103.61 3806.27 19 34.0551
6.288 8209.92 2440.75 0.29729 69.041 1173860.45 95.7438 3099.86 16 38.629
2.91 8276.38 2678.81 0.32366 90.4689 1180318.9106 124.828 3563.06 14 36.3236
6.343 6051.38 1192.96 0.19713 51.8689 847566.9091 70.465 2872.78 19 39.42
13.896 7488.29 2321.98 0.31008 35.3579 1043290.3035 89.4694 2782.38 28 39.011
1.323 15024.1 3890.08 0.25892 184.361 2119913.7277 218.145 5697 63 23.0142
5.838 15065.6 4949.02 0.32849 182.486 2091395.9731 230.655 4675.99 28 28.2712
1.994 6214.77 1770.36 0.28486 67.6895 887446.0872 80.2396 3074.55 18 39.1124
1.122 6093.71 1276.95 0.20955 56.7716 841197.4343 78.1469 2807.43 18 40.2782
14.442 5994.67 2374.23 0.39605 38.1619 815857.6515 94.5555 2019.74 7 43.5654
2.857 13875.8 3943.59 0.2842 148.628 1909910.0827 203.575 4635.71 34 29.7603
10.463 6761.46 2420.67 0.358 63.9346 912604.6671 97.4897 3021.5 60 39.6863
2.431 9452.54 2913.88 0.30826 88.0215 1326468.1299 130.515 4648.25 45 34.4033
7.435 6374.12 2084.36 0.327 43.0034 894895.8014 90.2057 3530.77 48 41.131
2.685 12664.4 3565.55 0.28154 150.017 1758822.1728 211.031 4836.54 59 28.5455
2.291 3977.12 678.82 0.17068 42.5362 524965.475 62.4694 2538.64 14 41.7329
1.785 8318.34 2495.76 0.30003 91.1324 1179364.0285 99.5384 3926.74 27 35.6174
2.258 9940.12 2435.67 0.24503 95.0813 1418484.3334 149.347 3907.33 40 33.552
14.91 8328.32 2362.69 0.28369 90.7274 1135361.7606 115.731 3744.1 32 35.3262
1.821 5858.64 1960.36 0.33461 71.3453 817597.7667 88.7729 3039.89 37 40.3523
14.04 10028.8 3295.55 0.3286 93.8573 1388709.0401 124.26 4714.88 33 34.6967
9.148 10311.4 2531.22 0.24547 146.446 1364528.8656 163.626 4397.81 58 30.3867
2.103 11622.7 4030.92 0.34681 126.286 1628361.0046 187.381 4178.06 47 30.8206
14.925 10414.4 3097.04 0.29738 95.7381 1482652.7038 123.043 3812.54 87 35.124
2.642 14548.7 5194.69 0.35705 165.008 2052563.1762 270.847 5154.67 169 24.4187
17.6 10094.1 3533.54 0.35005 65.4339 1421222.9102 142.307 4094.57 25 33.9285
8.679 6485.27 1611.3 0.24845 72.1529 882756.2252 98.1559 3190.86 56 39.3151
11.637 7171.36 2375.62 0.33126 63.1182 939507.4804 119.707 3046.94 27 37.8912
8.756 6688.44 1973.06 0.29499 63.7148 897335.8771 93.1187 3384.92 56 38.8065
0.827 15114.9 4255.99 0.28157 188.989 2107635.3372 227.481 5635.66 185 22.7622
1.648 9433.37 2763.79 0.29298 99.2176 1290731.9586 142.612 3587.26 117 34.2007
15.087 7482.59 2350.84 0.31417 54.3692 979074.0424 128.839 5880.37 19 37.0017
1.643 13024.8 3822.58 0.29348 150.761 1822949.9512 234.508 4255.28 79 29.9226
17.059 8396.07 2987.57 0.35582 67.1939 1146677.2888 132.439 4105.35 51 36.0393
1.981 8886.86 2412.47 0.27146 89.3298 1246993.9481 122.755 4136.74 48 33.0348
2.176 11370.5 3742.2 0.32911 115.059 1630804.5853 138.881 3899.1 76 34.6237
17.938 8099.99 3216.93 0.39715 70.8706 1150171.3095 113.504 3814.08 77 35.0458
8.991 14343.1 4082.57 0.28463 179.515 1987931.5131 221.302 4867.71 112 24.4147
9.917 4361.67 886.32 0.2032 39.3498 604516.464 53.0196 1747.51 53 44.9251
14.949 8200.78 2344.82 0.28592 75.4372 1114627.5537 104.715 3499.72 21 35.3284
20.418 14213.4 6146.31 0.43243 164.562 1963487.4851 269.613 5032.09 148 27.8404
4.985 8864.28 1967.14 0.22191 104.147 1245825.5218 116.487 3865.98 55 34.8594
1.932 14199.3 3728.73 0.26259 185.876 1917693.5511 215.068 4628.99 178 28.6656
5.873 3592.45 1405.34 0.39119 24.758 495129.6934 46.4867 1475.12 6 45.4007
2.815 10865.9 3054.63 0.28112 130.679 1553053.2014 169.635 4405.85 41 31.7521
6.552 4428.45 1291.98 0.29174 37.5052 607468.3958 60.9141 1451.99 9 44.334
1.521 4150.24 1398.21 0.33689 35.8028 569573.3485 51.7869 1455.32 17 44.3057
5.986 6242.99 2407.33 0.3856 63.4633 843237.5817 97.8255 3771.05 38 36.3914
9.545 8788.82 1770.4 0.20143 94.5942 1217920.7911 114.173 4026.49 103 35.1297
2.307 6491.74 1627.11 0.25064 53.4652 903698.427 76.5412 3112.35 63 39.4188
1.192 10924.9 2366.37 0.2166 141.899 1548753.9706 183.741 4544.9 50 30.3618
3.968 9095.39 2794.96 0.30729 99.1011 1259582.7418 124.917 4215.22 112 31.3529
2.546 12029.7 2928.95 0.24347 125.575 1676537.3436 165.342 4506.17 61 30.7752
6.83 5818.86 1050.05 0.18045 49.9614 812312.8329 71.1356 2832.32 5 40.4916
4.248 11817.4 3944.97 0.33382 164.746 1636510.4113 211.641 4687.73 84 29.3304
1.096 22743.2 5630.03 0.24754 343.077 3106194.8586 385.351 6226.14 129 19.8176
16.937 11094.9 5156.38 0.46475 95.1538 1563286.6864 177.986 3724.1 80 35.7597
9.731 5874.58 2314.02 0.3939 58.0598 802487.771 86.6652 2659.8 41 40.9281
1.523 13876.7 3293.76 0.23735 183.273 1944423.4987 204.626 4028.88 138 32.225
14.732 8201.94 2425.65 0.29574 87.227 1089030.3575 105.573 3455.87 29 35.0548
5.751 9611.84 3602.88 0.37483 85.4496 1371828.3901 139.602 3981.65 42 34.8275
5.588 8691.09 2858.61 0.32891 88.8293 1219123.1657 126.292 4147.61 92 34.8573
2.537 14895.8 4695.23 0.3152 218.919 2026215.5404 253.746 5271.79 120 20.4434
5.282 17302.9 5103.69 0.29496 227.401 2372630.6149 296.204 4839.89 162 26.7527
2.025 10772 3007.01 0.27915 136.494 1481659.8813 168.62 4453.56 88 31.5429
10.762 6720.9 1538.31 0.22888 53.3765 931379.2946 93.8304 2678.71 93 39.9638
12.686 7556.87 2894.88 0.38307 78.2656 1042446.5369 122.474 3565.07 62 36.9575
2.849 5247.3 2079.9 0.39637 34.7481 745029.6842 68.8069 2516.76 39 42.751
12.427 5087.43 1660.06 0.3263 55.447 675692.1092 77.005 2420.37 57 42.0697
2.474 5978.65 1713.44 0.28659 52.2153 830515.5344 74.9531 3239.28 58 38.9009
5.207 5631.09 1910.58 0.33929 56.1362 786081.9009 74.4154 2610.93 25 41.206
1.291 15128.3 4038.74 0.26696 187.504 2138482.1263 211.001 5701.27 66 22.9694
1.279 8755.85 2409.79 0.27522 97.4773 1208008.8135 141.527 3325.29 6 36.2959
11.492 10107.7 1727.95 0.17095 93.5594 1397184.994 114.683 3824.72 106 32.8478
18.11 12392.1 5041.69 0.40684 110.078 1685489.2021 175.058 4720.62 35 31.3296
16.894 11572.4 4284.28 0.37021 104.407 1631768.15 145.23 4032.51 49 34.5218
18.036 9372.83 3781.91 0.40349 66.9142 1294686.1974 134.254 4263.09 44 38.2778
0.672 8147.38 2289.68 0.28103 87.1144 1129299.4847 111.675 3105.9 21 37.631
2.357 11978.5 3288.57 0.27453 164.921 1692287.226 194.825 4649.08 108 29.5772
18.756 13006.1 3635.6 0.27953 138.405 1776468.6949 188.259 4997.82 64 27.2267
10.947 9078.14 2700.65 0.29748 106.338 1283491.6305 119.337 3479.47 39 30.5263
2.124 8056.64 2270.74 0.28184 94.3646 1139344.4177 114.68 3544.71 97 36.7609
1.906 6714.26 1617.82 0.24095 61.1964 943637.0096 85.9562 3568.19 26 38.0781
15.339 7345.95 3064.51 0.41717 65.0679 998044.905 116.047 3320.95 49 37.8554
4.11 5801.7 897.05 0.15461 53.258 800329.4647 64.1319 3008.23 21 39.7153
2.045 9277.86 2149.49 0.23167 106.113 1260902.6315 140.671 4011.76 37 34.0007
7.674 6354.55 1556.71 0.24497 65.2549 858015.9952 91.9817 3291.04 51 39.1956
14.249 7642.75 1937.04 0.25344 87.8864 1088772.2569 106.471 3267.54 79 46.5464
1.609 12114.6 2183.14 0.1802 146.602 1694747.3116 160.368 4655.04 152 29.6538
0.495 8121.37 1960.2 0.24136 97.0241 1141085.3027 120.203 3219.13 4 36.9994
8.977 17757.8 4712.18 0.26535 220.684 2419696.6706 277.003 5818.49 213 46.5464
5.39 8317.08 2217.99 0.26667 78.7085 1092211.5778 103.407 3185.51 75 38.3466
1.43 7476.26 1652.55 0.22103 85.8531 1041655.9858 103.72 3918.1 29 35.9642
0.605 7938.3 2203.57 0.27758 85.4833 1095569.0301 112.489 3100.17 21 37.6302
2.705 14371.6 3423.02 0.23817 181.399 2064724.323 241.152 4846.65 92 27.6899
12.58 16911.9 5175.01 0.30599 207.523 2407142.8234 286.948 5560.48 273 24.6067
13.029 5369.38 1850.61 0.34465 42.7601 719938.7095 74.3148 3562.51 24 43.1403
3.44 11541.1 3389.85 0.29371 106.538 1635956.1737 161.61 4262.94 133 32.8637
18.702 8087.7 2399.44 0.29667 65.1826 1121400.6133 112.969 3508.12 20 38.2184
6.13 14129.8 4429.99 0.31352 153.557 1929775.1173 213.817 5566.85 12 30.8032
2.902 11522.9 2860.03 0.2482 135.763 1606650.4379 154.159 4455.16 53 29.8794
7.647 5900.59 1285.56 0.21786 66.7186 821646.2806 77.9453 2813.26 78 39.7008
1.987 10729.4 3046.91 0.28397 127.939 1497870.2409 174.344 4656.31 74 29.7637
17.251 7804.21 4075.69 0.52224 86.2111 981036.7078 156.972 2404.63 114 40.1848
1.65 8303 2289.53 0.27574 100.936 1146240.0098 132.145 3322.88 117 35.8158
3.541 12496.1 3505.31 0.28051 169.75 1740266.0088 200.005 4771.1 62 28.2337
14.26 6040.95 2386.99 0.39513 38.3541 823600.0704 101.196 1806.86 7 42.2747
1.557 8771.64 1837.27 0.20945 100.789 1220045.5682 129.592 3658.66 23 34.0499
2.446 11177.8 4087.85 0.36571 51.832 1567468.3176 169.134 17661.6 49 39.3324
1.741 6547.91 1598.51 0.24412 54.0993 922446.9409 77.3812 3367.94 58 39.3184
3.748 6108.79 1645.77 0.26941 50.2439 849590.8218 78.115 2813.79 27 40.2401
2.466 11980 3133.5 0.26156 156.532 1699629.2466 198.62 4611.9 105 29.8018
2.54 9101.99 3170.98 0.34838 117.764 1261484.6866 141.929 3925.05 60 34.5785
1.976 12095.1 3322.76 0.27471 130.226 1663387.0513 169.508 4564.99 81 30.9009
9.979 5787.27 2401.79 0.41501 49.1059 806005.1889 86.1888 2986.44 46 43.1536
2.658 10914.1 2641.7 0.24204 123.613 1470456.0351 174.024 3967.33 79 32.7095
15.691 9844.7 3513.26 0.35686 90.2194 1323443.1868 133.851 4245 47 36.235
1.454 15237.7 3096.19 0.20319 173.425 2149084.024 201.969 4227.32 138 31.3816
2.25 15783.1 5581.15 0.35361 239.374 2148495.6797 262.845 5341.94 142 24.1589
3.672 8958.13 2225.49 0.24843 80.0963 1266951.2768 117.467 4027.85 76 27.2694
17.446 7869.09 3824.55 0.48602 94.7707 978859.6356 144.96 2629.69 106 39.5683
19.64 12578.5 4795.28 0.38122 152.377 1815830.2456 183.008 5982.54 161 27.0574
10.069 4478.64 924.12 0.20633 36.376 620657.8102 53.516 1792.56 33 44.2743
3.466 10484.2 3507.94 0.33459 94.6619 1454764.8971 142.52 3940.58 16 34.5297
14.092 5518.96 1778.56 0.32226 39.1491 770292.2657 74.8458 3043.95 43 37.2966
0.551 11887.8 2206.55 0.18561 151.127 1614690.8141 189.611 4899.57 141 29.8518
4.623 22844.8 8229.46 0.36023 266.88 3191879.7886 357.573 5777.12 78 22.265
1.774 12031.3 2313.39 0.19228 147.157 1696528.3884 169.484 4692.59 151 29.8727
4.37 9875.53 2493.19 0.25246 95.9164 1395733.5256 117.508 4112.59 102 33.2199
8.168 18834.7 4881.18 0.25915 183.283 2662124.8972 227.557 6089.51 237 22.356
13.386 6028.05 1348.72 0.22374 51.3846 821239.671 76.9172 2560.42 23 38.9405
3.001 6047.61 1802.23 0.298 53.2049 842409.656 75.5459 2527.81 38 41.7527
1.828 8878 2154.47 0.24267 83.2424 1265016.465 118.232 4016.68 7 34.6654
4.269 6533.92 1547.3 0.23681 66.2317 896856.2398 81.6554 3130.18 38 37.308
7.662 5843.35 2378.7 0.40707 63.2628 808750.1833 90.1178 3147.83 71 38.9198
2.268 8481.95 2446.59 0.28844 92.6337 1198922.3359 113.812 3634.84 93 36.8547
12.679 7505.3 3251.47 0.43322 56.7361 1055181.534 132.337 2720.54 60 39.4447
2.993 13117.4 3488.3 0.26592 158.17 1854638.3848 201.79 4811.13 64 28.3768
2.346 10024.4 2240.26 0.22348 78.9025 1423882.1544 125.723 4714.2 26 32.7579
2.324 9356.16 2264.41 0.24202 107.926 1272182.7427 141.039 4037.36 41 34.303
16.154 10471.5 2833.97 0.27063 104.093 1431395.1971 136.298 3590.45 13 36.3134
3.488 8372.56 2057.32 0.24572 83.1722 1186950.0281 107.451 3818.31 20 35.2939
1.423 6055.22 2005.7 0.33123 57.9974 836741.3693 90.9317 3297.7 71 36.5969
20.738 13053.5 5005.36 0.38344 110.88 1850848.5999 190.264 6067.5 99 30.9176
9.062 5803.02 1332.85 0.22968 68.6451 802472.4479 78.2837 2767.3 71 39.5686
4.06 10105.9 3318.81 0.3284 117.069 1435310.9365 162.62 4234.33 63 33.5385
7.022 5238.78 1437.72 0.27443 47.0888 746696.6917 67.2842 2334.64 21 41.613
11.377 13940.6 5558.68 0.39874 139.293 1953637.5321 232.203 5319.41 92 25.5172
6.258 7256.2 2356.55 0.32476 66.7788 1043695.6338 95.4844 3219.06 29 39.5344
2.112 3954.47 941.3 0.23803 34.2029 564115.4143 43.2465 1776.1 12 44.4813
12.335 5557.8 1664.46 0.29948 54.5918 739099.2484 77.6398 3279.47 24 41.5433
14.778 8689.28 2036.59 0.23437 73.1912 1211609.7737 101.837 3959.12 72 35.4685
13.367 5141.29 1704.33 0.33149 30.7427 701023.3817 73.4885 2020.91 10 42.6503
4.031 8463.1 3127.13 0.3695 81.8466 1211219.2721 131.466 3532.57 36 37.1714
3.052 14590.1 2871.82 0.19683 177.101 2023772.1727 223.065 4849.84 79 27.7006
16.904 5977.6 1085.43 0.18158 53.6319 832013.2811 65.0972 2921.94 29 46.5464
3.029 10098.8 4295.71 0.42536 84.1984 1422529.8002 153.399 3808.24 110 34.5143
7.301 16788.7 5483.99 0.32664 184.34 2335620.2341 279.795 5604.02 98 23.6274
7.133 16106.9 5993.34 0.37209 203.876 2229895.2019 269.617 4748.93 78 27.7723
2.584 18949.5 5721.2 0.30191 258.1 2570349.1731 301.222 5742.45 329 21.6079
2.445 5934.59 1495.37 0.25197 67.7291 747181.509 78.1542 2916.36 28 39.0735
2.968 18770.6 5635.94 0.30025 266.904 2545713.7742 308.753 5726.71 329 21.234
11.609 7994.53 2769.54 0.34642 86.7855 1076053.3521 138.377 3027.39 74 39.7108
17.001 8070.01 2034.78 0.25214 71.8586 1064804.4433 112.942 3094.49 47 38.4384
3.85 9785.06 3219 0.32897 103.451 1354139.7239 132.968 3916.73 26 34.0661
3.393 7104.94 1687.99 0.23757 67.6566 1040319.319 77.2327 2663.5 31 39.8954
2.075 8863.78 2134.46 0.2408 84.2511 1256394.7839 106.289 4601.01 27 33.5179
18.463 5964.52 1454.71 0.24389 67.0414 847118.1412 74.5784 2790.69 66 39.6641
9.175 7994.12 2183.9 0.27318 69.1567 1099733.6561 101.23 3466.6 35 30.5847
0.864 12046 2624.27 0.21785 145.256 1709359.9057 181.045 4642.48 50 29.6825
2.805 16436.3 5384.95 0.32762 213.361 2168156.7423 254.783 6070.58 253 21.5807
5.165 7749.52 1847.96 0.23846 53.8104 1111167.8989 81.948 3385.94 16 39.9385
17.683 12561.3 5122.92 0.40783 96.9964 1784489.0992 178.269 4089.77 19 33.8613
0.603 9448.94 2417.21 0.25581 102.515 1332138.5001 156.046 3831.32 12 34.1232
15.036 5252.1 1190.17 0.2266 40.6437 720259.2761 78.8304 3050.87 30 41.2713
4.063 8159.13 2177.67 0.26689 82.5614 1113715.4436 132.878 3598.33 33 35.9899
1.982 14688.3 4483.06 0.30521 203.101 2040295.2727 253.156 5284.15 287 24.6943
13.425 5555.26 1333.19 0.23998 50.5959 755215.4378 68.5866 2439.85 27 40.7499
12.666 7249.81 2527.65 0.34865 72.7832 1001772.5436 109.339 2826.56 13 39.8313
3.728 9592.72 3217.56 0.33541 84.0236 1368994.8394 138.988 3501.3 14 36.1192
15.417 8179.9 2861.17 0.34978 64.6746 1070818.3254 114.305 3611.67 64 38.1924
1.138 7797.13 2162.83 0.27738 86.0277 1084244.9496 112.556 3049.92 21 37.7029
0 7912.81 2191.19 0.27691 80.3448 1112200.1788 114.63 3642.26 14 35.8766
4.845 5385.3 1238.2 0.22992 53.2933 746880.4831 72.8736 2607.34 36 41.0233
16.175 7219.59 2659.51 0.36837 69.3225 1042183.2379 88.0183 4119.83 70 38.6286
8.779 7941.18 1950.28 0.24559 63.0049 1097924.1285 101.681 3247.65 25 38.0724
1.667 5678.71 2042.43 0.35966 51.4162 780571.261 74.7782 2501.25 46 42.0029
2.261 8272.54 2567.22 0.31033 95.2349 1172502.6541 119.718 3543.77 88 36.7589
1.898 10486.2 2647.04 0.25243 125.692 1449967.8933 157.261 4697.25 65 30.0027
20.645 15685.9 4876.32 0.31087 154.885 2147957.1312 235.363 4378.35 95 30.5651
3.943 7651.46 1896.41 0.24784 60.9202 1070895.9917 96.5834 3270.05 104 37.3349
2.612 8936.31 2112.31 0.23637 99.6474 1262717.8437 123.864 3799.8 50 46.5464
3.491 13561.9 4746.98 0.35002 165.468 1944650.2949 234.13 4499.99 28 29.8215
2.969 8449.75 2589.44 0.30645 82.0963 1186090.5369 123.314 3312.08 15 36.3128
4.031 8327.8 2871.17 0.34476 83.068 1175018.4984 118.711 3941.6 42 31.4193
11.301 7823.6 2109.19 0.26959 62.7449 1089948.654 104.138 2737.48 88 39.3848
12.797 6354.74 1788.95 0.28151 58.2362 885930.9702 94.589 3115.54 62 39.0155
13.539 6266.33 2041.94 0.32585 72.3415 844380.3764 93.7973 3131.15 22 37.6505
15.347 9020.45 2982.76 0.33066 79.4632 1201965.4941 118.314 3859.99 61 34.926
2.757 14948.5 3795.88 0.25393 189.126 2109926.3681 208.595 5692.07 65 26.6861
4.107 6214.18 1407.32 0.22646 55.206 834726.8249 79.9992 2443.6 33 41.2417
19.571 13782.9 3889.25 0.28217 165.77 1971988.4182 218.883 4687.6 134 28.6913
17.532 7878.71 2149.57 0.27283 67.9637 1135182.9557 100.341 3008.81 49 39.2718
2.028 3982.52 1252.6 0.31452 35.1437 544739.0434 51.9044 1391.25 17 44.3116
9.512 4399.11 934 0.21231 39.6567 637035.8527 54.4714 2363.71 35 43.1971
3.536 8913.17 3736.47 0.4192 84.7385 1232852.5429 139.912 3801.56 101 34.6054
2.779 10652.6 3794.59 0.35621 122.998 1454007.4065 182.139 3907.42 16 32.9825
4.018 13198.6 4642.15 0.35171 153.916 1849840.2514 175.901 5190.86 46 27.4016
15.977 9337.59 4003.61 0.42876 78.8122 1232503.4928 150.062 3552.68 33 39.294
9.936 5220.07 1959.76 0.37542 36.256 731104.0151 72.0165 2391.74 23 44.4759
2.237 9008.92 2724.24 0.30239 69.8332 1305426.9159 118.783 3282.54 30 37.5868
2.361 14945.3 4524.49 0.30273 177.923 2065179.4813 255.662 5535.94 154 22.93
15.356 6955.78 1675.15 0.24082 56.5305 993936.3244 84.8497 2860.58 54 35.479
15.688 9735.11 4118.35 0.42304 86.8314 1403208.977 130.596 4139.3 68 33.4783
0.998 13029.2 2631.31 0.20195 158.46 1786557.4549 187.248 4732.96 136 29.9961
16.275 8105.16 2587.7 0.31926 99.387 1136092.4628 135.083 3945.22 165 32.5853
18.66 9808.08 4127.77 0.42085 81.0731 1324854.1793 150.725 5145.13 40 33.1685
3.895 7891.08 2573.23 0.32609 71.639 1060341.5058 113.42 3472.95 76 38.2642
13.474 9581.42 2864.66 0.29898 99.3381 1281465.7791 120.869 4106.91 47 36.1335
18.228 8680.52 2890.27 0.33296 71.2367 1224981.5246 115.419 3624.08 54 35.4145
8.587 5444.17 1357.78 0.2494 37.6428 750426.0825 57.9019 1998.23 45 43.0763
15.174 9740.12 3521.9 0.36158 95.3027 1357899.0841 156.415 4245.13 98 32.9052
1.864 10202.1 2653.28 0.26007 91.5636 1453171.1018 137.402 3649.18 122 35.5868
2.815 10865.9 3054.63 0.28112 130.679 1553053.2014 169.635 4405.85 41 31.7521
10.681 22603 8267.95 0.36578 235.118 3118946.7848 329.721 6453.56 111 18.085
18.96 13419.4 4311.43 0.32128 149.06 1873828.5617 200.205 4690.68 139 30.4318
2.633 8579.52 2409.22 0.28081 102.972 1192583.1683 116.41 3878.8 31 33.909
17.688 8356.56 2663.95 0.31878 84.2367 1152945.6338 105.046 3878.82 47 35.1459
19.747 15641.8 7067.32 0.45182 129.457 2119301.4974 271.727 5151.39 110 27.6838
2.011 8208.74 2386.95 0.29078 73.0677 1194304.2537 108.098 3085.94 28 38.0486
0.752 8595.95 1616.52 0.18805 91.6661 1217303.6914 118.506 4236.98 47 32.9598
16.877 5817.34 2274.8 0.39103 53.4294 768669.7744 92.3227 2802.23 61 40.4422
0.752 10653.8 2335.72 0.21923 103.083 1509167.2069 151.691 4375.26 46 33.049
9.768 7884.32 1619.34 0.20538 69.5817 1081965.0465 89.7246 3376.91 28 37.107
11.66 4738.39 1556.1 0.3284 47.6437 661715.8954 78.8528 2195.32 65 42.2017
1.896 15805.4 5814.45 0.36787 186.965 2191404.9311 255.489 4685.78 31 26.5396
14.816 6890.3 2586.93 0.37544 61.5549 957766.2913 107.759 2960.82 68 38.8442
19.798 12443 3302.85 0.26543 119.648 1801339.9129 171.675 4106.48 125 34.222
15.364 7753.33 2219.57 0.28627 71.3263 1084816.2596 91.1113 3355.81 28 29.5915
1.754 4018.23 1400.33 0.34849 36.6503 551815.0328 53.1789 1432.08 18 44.1767
1.762 8247.62 1881.43 0.22811 84.2524 1169069.6615 92.9602 3943.3 16 35.4044
16.404 15347.3 3894.58 0.25376 160.453 2202819.6259 212.274 4668.13 36 27.7018
4.03 14828.5 4203.78 0.28349 245.22 2019874.2261 264.111 4837.27 273 27.4366
4.393 14297.4 4294.92 0.30039 160.611 2026801.6749 224.014 4834.97 94 28.2522
15.96 12776.5 3829.41 0.29972 152.803 1807475.5259 166.557 6207.67 38 25.7167
11.738 5074.33 1854.64 0.36549 46.2842 729630.1098 77.725 2349.52 62 42.3761
1.619 5912.1 1399.05 0.23664 48.8017 824619.1565 72.5899 3142.52 60 38.4617
3.102 6905.83 2815.11 0.40764 70.708 954592.9095 99.3279 3130.94 33 39.9253
16.643 9902.55 4187.88 0.4229 91.5448 1370169.8914 144.424 3640.13 25 36.983
2.42 5939.93 1597.24 0.26889 63.6602 743395.387 94.3356 3092.38 19 39.3886
15.464 10482.1 2958.15 0.2822 110.19 1473708.2823 136.697 4256.97 71 33.4243
2.069 5382.83 1317.87 0.24482 44.8999 748212.0602 63.8641 2872.55 16 40.4156
19.186 7849.99 2795.04 0.35605 66.121 1089187.3557 104.717 3287.52 93 36.6072
1.597 12057.9 3218.45 0.26691 149.423 1725340.7095 175.338 4696.08 26 29.1611
11.552 4095.09 1243.95 0.30376 33.028 557023.1385 50.918 1399.17 32 44.4648
18.031 10973.3 4491.21 0.40928 47.8877 1532147.4541 145.107 4049.02 101 34.0011
1.701 8585.11 2288.67 0.26658 98.3543 1180397.4163 122.626 3369.83 112 33.0147
9.316 7892.55 1573.39 0.19935 76.9422 1094009.7996 81.4289 3707.68 59 35.7978
2.203 8941.36 2472.5 0.27652 103.261 1239693.1168 120.276 3916.02 27 33.7628
1.019 8113.19 1669.74 0.2058 74.5623 1162532.2496 110.385 4057.65 101 34.8721
4.274 3640.97 1459.11 0.40074 25.5942 493945.3893 49.9234 1488.98 6 44.8665
13.504 6125.94 1522.4 0.24851 63.2746 844279.241 83.8848 3166.65 35 39.3345
10.21 6518.13 1816.69 0.27871 57.1751 890112.1929 85.5078 2708.99 48 39.9102
19.661 8641.24 2972.12 0.34394 77.2308 1167270.0302 127.507 4114.57 62 33.339
13.322 7122.28 1922 0.26985 63.7838 946257.5387 99.1888 3247.31 58 38.7752
3 14097.1 3255.79 0.23095 200.899 1971000.267 238.747 4938.18 139 26.3183
3.364 21778.1 6480.38 0.29756 308.829 3002954.198 356.712 6265.81 112 17.8824
1.669 6769.67 2073.42 0.30628 54.0535 973052.481 75.2766 3304.58 61 39.1176
9.511 16792.4 5862.45 0.34911 203.746 2241010.9441 264.954 5511.67 115 24.3029
0.538 9239.75 2236.34 0.24203 108.211 1302716.1162 152.638 3831.33 15 34.6009
16.559 8343.74 2853.75 0.34202 95.8908 1092915.5742 143.81 3529.81 83 36.9378
13.611 9343.06 4165.45 0.44583 58.9776 1325768.3958 154.97 3398.45 65 38.9
1.509 5543.2 1364.52 0.24616 49.2237 790418.3767 72.4513 2853.45 58 39.5253
10.825 5427.85 1570.88 0.28941 47.2954 774700.5123 76.9845 2347.79 62 42.3801
5.155 7326.36 1991.03 0.27176 70.0225 1002987.3287 102.135 3478.38 45 36.0231
12.809 4120.18 1641.61 0.39843 38.3952 555175.5708 56.855 1401.72 52 44.2281
16.785 7482.74 2870.91 0.38367 52.5636 1023583.6316 113.838 4004.64 31 35.9921
3.462 8836.82 3110.34 0.35197 115.333 1208520.1231 103.428 4770.24 98 33.2007
12.573 8596.96 3443.62 0.40056 91.5238 1238721.9062 125.919 3631.47 29 34.0323
13.691 7216.42 2232.68 0.30938 68.7317 1032362.7635 104.547 3261.39 20 36.4909
2.406 6762.63 2308.07 0.34129 80.7238 926072.406 91.847 3219.17 66 38.4853
2.603 12734.2 4390.85 0.3448 146.725 1776814.4282 201.041 4929.34 169 28.4303
17.175 7207.62 1898.73 0.26343 68.9493 1030588.9476 90.0106 2962.74 48 34.3167
13.912 6422.43 2067.82 0.32196 57.6604 820291.9651 106.162 2780.82 17 39.0151
7.02 7330.66 2308.54 0.31491 64.6087 1048675.4916 90.7514 3897.27 47 39.5179
1.428 7180.47 2816.94 0.3923 63.8198 1050557.6192 95.1843 3213.44 30 38.8942
12.162 6664.96 1311.5 0.19677 58.3876 943102.4332 75.7179 3796.17 45 39.4293
13.275 9157.66 2633.75 0.2876 76.6516 1241001.229 116.341 3923.43 116 33.6738
3.272 22671.5 6791.78 0.29957 306.599 3127733.8201 355.635 6359.95 93 17.5742
14.789 7381.42 1988.33 0.26936 86.6335 992864.7379 106.089 3614.51 29 35.6208
16.492 6728.19 1386.07 0.206 55.8557 920449.7916 82.19 2757.76 35 35.5142
0.539 11837.6 2183.17 0.18442 143.655 1611195.2329 194.148 4827.7 141 29.6502
1.824 3536.09 1102.69 0.31183 33.2933 483073.2343 45.893 1392.91 19 44.5118
3.901 9119.04 2652.2 0.29084 91.1344 1244224.5484 123.244 4454.2 117 32.4924
1.294 8694.97 3056.09 0.35147 87.553 1154685.6212 132.739 3691.27 49 35.8224
4.484 5911.75 965.2 0.16326 51.6863 821736.7694 61.4743 2978.55 25 40.2245
11.446 3940.67 1185.1 0.30073 33.2984 536154.4555 50.8762 1398.88 32 44.5028
4.308 8823.41 3010.39 0.34118 89.9434 1247255.377 128.615 3665.93 31 35.5226
11.274 10763.7 4134.12 0.38407 90.0083 1507871.4821 153.11 4038.74 64 37.0991
2.007 14185.8 4431.38 0.31238 166.225 1964891.5938 216.034 5193.51 181 27.8229
2.945 8679.42 2421.84 0.27903 87.3915 1191611.4605 123.344 3850.59 45 35.195
12.453 6203.34 2672.96 0.43089 55.673 882965.9893 88.5302 2720.33 30 40.4059
1.809 9709.47 2793.12 0.28766 108.372 1313294.9449 153.412 4091.83 47 33.6151
3.883 12936.2 4136.68 0.31977 173.93 1789368.8607 203.608 4837.35 110 28.2598
0.794 12405.6 2346.07 0.18911 152.858 1682799.5704 193.376 4754.82 139 29.9406
7.331 9697.76 2368.24 0.2442 87.9107 1347221.2978 120.81 3935.4 146 34.501
1.508 4001.51 1116.13 0.27892 34.3219 548031.4428 47.1045 1395.09 17 44.3155
18.141 12435 4299.6 0.34576 107.955 1722394.2248 164.332 4921.3 82 29.2561
1.346 9163.3 2551.6 0.27845 93.8933 1261174.5237 154.976 3272.93 12 36.6055
2.669 7933.35 2116.94 0.26684 66.2199 1095269.4856 109.886 3952.68 37 34.6166
16.821 8368.23 1861.47 0.22244 76.5068 1088718.2413 107.249 3282.72 43 38.4965
6.382 14113.1 4867.73 0.3449 166.597 1918678.8758 237.999 4669.73 97 29.5191
1.734 12224 2644.04 0.21629 150.068 1725395.9405 176.791 4686.89 139 29.8226
12.475 9314.27 2831.67 0.30401 73.5397 1278570.2429 108.308 3841.75 61 38.0931
1.897 14265.7 4133.96 0.28978 147.018 2030495.0662 210.791 5537.5 78 25.9405
14.734 7982.53 2685.24 0.33638 79.2726 1097116.769 108.961 3243.67 91 34.7087
2.065 9138.66 2288.8 0.25045 101.681 1281694.4146 125.101 3802.58 23 35.5261
1.592 12066.1 2835.62 0.235 143.475 1655349.6717 175.24 4448.03 17 30.7236
4.117 9580.19 1858.49 0.19399 92.689 1338515.7095 107.068 3840.18 156 32.8427
1.14 9432.72 2543.68 0.26966 113.238 1283443.2535 156.167 4102.52 68 32.373
13.748 7228.6 2025.16 0.28015 60.6927 978020.4487 94.7866 3263.37 65 38.1368
2.384 8505.2 2787.85 0.32778 96.3075 1210137.4378 122.178 3546.66 92 36.975
3.805 6106.41 1577.74 0.25837 62.7712 800530.32 80.9197 2762.13 30 38.9504
8.157 4208.51 1045.33 0.24838 44.3996 603597.2463 56.1608 2311.57 49 43.3513
11.276 4119.46 1333.36 0.32367 35.3804 565013.962 52.9203 1392.68 32 44.4019
4.331 10858.8 3688.63 0.33969 74.1353 1502109.1037 149.184 3693.02 44 34.3955
1.894 8061.26 2664.79 0.33056 67.6833 1098795.7113 107.789 3463.94 43 37.6456
1.682 10839.7 3088.86 0.28495 119.632 1453633.966 163.18 4149.47 38 33.2569
16.173 6975.79 1615.94 0.23164 60.6296 992677.7049 80.1136 3183.68 47 39.8702
4.045 24700.4 8163.06 0.33048 246.251 3429875.4375 386.654 8574.97 196 23.5584
14.648 15958.4 5952.21 0.37298 187.184 2167102.8251 267.211 5934.33 142 27.1689
14.549 5726.44 2176.28 0.38004 49.0151 771427.5415 96.4654 2886.33 56 40.2712
8.476 6111.26 1479.49 0.24209 62.2312 876210.1745 81.9538 2361.36 26 40.6283
4.753 5482.73 1361.71 0.24836 42.5588 782942.9298 61.2226 2533.46 17 41.5847
2.61 19251.2 5719.6 0.2971 253.391 2610589.213 314.588 5762.57 322 21.1737
10.843 4648.76 1759.77 0.37854 46.9062 674306.2811 68.1371 2375.4 58 42.9753
16.906 5850.79 1418.99 0.24252 68.4288 810826.3543 77.5344 2783.08 70 38.3616
3.192 9263.38 2281.05 0.24624 96.2641 1297410.7951 128.289 3773.36 18 34.067
2.042 16466.5 3707.04 0.22512 213.31 2316765.8433 254.601 5558.99 90 23.6249
14.171 12157.7 4273.87 0.35153 118.452 1687365.0323 170.311 4759.36 109 32.6179
17.106 10115.3 2965.49 0.29316 96.7605 1357203.2046 129.121 4727.4 52 31.8473
16.889 11290.5 3690.43 0.32686 99.8035 1584795.7378 158.362 5631.55 50 35.6803
2.82 6541.48 2113.46 0.32308 63.297 878964.7396 99.1076 3064.2 22 39.8068
1.612 12122.1 3652.36 0.30129 157.307 1700046.5016 230.816 4223.2 82 31.1283
2.649 11359.3 3782.7 0.333 122.783 1585271.628 198.089 4632.17 67 30.4082
19.657 9707.53 3157.41 0.32525 68.7766 1407944.5677 121.512 4147.22 69 39.3858
15.092 6484.82 1908.32 0.29427 58.8805 885777.1915 87.278 2662.18 30 39.8316
11.94 6730.31 1773.06 0.26344 62.7471 932403.9477 92.4874 3183.91 76 38.977
17.151 17182.7 5208.55 0.30312 170.413 2322816.5081 229.777 5166.94 170 28.4258
15.242 9069.84 3122.27 0.34424 99.2988 1212807.3396 138.218 5849.38 53 35.2435
3.328 12476.6 4115.64 0.32986 165.413 1757110.8312 222.823 4842.87 47 28.258
17.462 9266.99 3307.4 0.3569 86.0671 1268477.5139 126.825 4310.18 34 35.6888
1.663 8871.38 2155.25 0.24294 82.2219 1268410.9846 114.274 3917.65 2 34.3618
3.976 11312.6 3945.82 0.34879 133.865 1499592.928 172.844 4166.91 39 33.222
12.794 6885.62 2130.43 0.3094 68.6567 963399.3826 85.1012 2866.86 44 39.9609
5.583 15964 4588.33 0.28741 173.513 2194204.3484 257.167 5305.45 79 24.8961
4.505 8306.28 2569.94 0.30939 66.2457 1158446.5254 107.903 3321.95 37 36.0842
2.928 12850.9 3996.25 0.31097 138.908 1787531.4057 177.042 4363.65 34 30.1103
1.55 13587.7 4379.26 0.32229 144.498 1931520.0808 200.315 5724.98 69 25.2662
11.799 16665.8 5336.43 0.3202 180.738 2256257.9762 272.444 5398.5 131 24.7274
1.693 12776.2 3667.78 0.28707 159.041 1771098.2951 227.741 4424.52 92 25.0081
0.685 7843.48 1983.4 0.25287 91.0143 1092912.4636 126.43 3216.24 4 37.0301
15.405 7477.48 2128.58 0.28466 60.8442 1086854.1192 86.3286 3607.39 35 40.9301
1.642 13572.5 4945.69 0.36439 113.428 1874921.1616 190.192 5885.19 78 34.0557
4.005 14033.3 3916.5 0.27908 196.192 1855756.6687 228.099 5705.06 250 21.5767
2.316 9599.72 2532.62 0.26382 106.386 1360496.5822 152.71 3880.05 43 33.6561
2.287 9190.38 1902.55 0.20701 97.5409 1263848.3934 120.708 4184.95 40 34.1095
7.822 4179.99 959.19 0.22947 30.2784 590452.6411 43.8961 1950.86 49 44.9507
18.288 11240.9 4556.74 0.40537 113.98 1615189.9465 166.541 4317.59 104 32.8395
14.884 7938.44 1862.35 0.23459 55.737 1129382.2307 81.4629 3370.66 26 38.5257
2.047 6505.34 1435.63 0.22068 65.336 919892.9771 78.2799 3095.72 16 38.8805
2.799 8082.83 2311.49 0.28597 94.82 1087085.2576 115.917 4245.09 110 33.3356
3.259 14392.1 2730.07 0.18969 174.319 2021209.212 217 4922.46 84 27.5421
1.983 9056.68 2128.29 0.23499 78.9417 1290225.9945 105.176 3985.16 12 34.2226
11.304 3621.11 1091.7 0.30148 33.9963 487400.3225 48.5196 1351.15 27 44.8013
1.504 6259.42 1710.52 0.27327 52.0175 902115.5503 82.2598 3072.95 56 40.5236
17.084 6760.44 2129.51 0.31499 73.2541 946106.4637 100.635 3223.17 58 38.1177
4.369 5220.96 1433.47 0.27456 46.688 740257.5589 65.7975 2034.31 2 42.0903
11.592 6939.54 1837.7 0.26481 64.0147 977380.8878 73.0449 3972.68 77 38.3721
4.218 12435.5 3653.2 0.29377 150.602 1697682.45 191.274 4589.51 37 29.8534
14.305 6161.01 2319.87 0.37654 52.5215 821418.757 97.1736 3257.77 61 39.2122
0.89 9265.41 2409.73 0.26007 110.527 1274677.2406 148.695 4138.19 72 33.1
12.696 8730.17 2502.75 0.28667 78.6909 1206960.9905 108.862 3676.23 55 37.3659
20.598 18433.6 7308.61 0.39648 249 2480023.2949 350.072 5329.41 272 24.4212
3.328 12401.2 3225.16 0.26006 165.925 1728575.6998 194.254 4813.77 73 28.7305
1.77 11014.3 3574.04 0.32449 124.426 1468093.5317 172.054 4080.62 49 33.5906
19.538 9894.9 4228.85 0.42737 93.0638 1433647.2476 134.623 4713.61 31 35.2404
1.871 17625 4509.73 0.25587 214.397 2457434.5643 266.244 5654.31 199 22.331
2.49 15429.7 4773.74 0.30938 182.963 2032630.9741 223.762 4347.94 108 30.4416
14.401 8557 2014.9 0.23546 74.7588 1212969.5342 115.203 3832.67 70 36.6684
1.912 15206 5689.09 0.37413 192.743 2112406.7021 252.184 4340.96 33 26.1432
6.631 7593.22 2968.97 0.391 55.5849 1028842.3659 117.321 3597.17 51 36.9288
20.491 16246.1 7030.88 0.43277 138.775 2238699.9187 249.935 5580.48 99 23.6419
11.602 4191.54 1342.89 0.32038 36.9744 569339.8916 51.4928 1433.93 32 43.8953
17.323 6857.45 2048.52 0.29872 63.1877 925149.8675 102.366 4033.66 58 36.7431
9.076 6312.36 2026.05 0.32096 62.7191 901598.4226 79.047 3279.52 27 38.9258
4.222 8938.45 2496.91 0.27934 102.423 1278300.7867 137.191 3959.92 51 33.9153
3.341 14446.8 4276.05 0.29598 129.368 2001628.4639 206.38 5369.08 69 25.9084
5.51 8331.66 1918.31 0.23024 60.2821 1173525.4852 93.2057 2939.85 30 38.6665
4.021 9881.06 1996.57 0.20206 85.5956 1405566.3726 123.416 4726.11 37 32.3612
9.347 6838.18 2015.25 0.2947 64.2676 934704.198 95.6356 3376.54 81 38.6705
2.652 10970.7 3650.5 0.33274 124.088 1521390.1667 178.54 4116.57 34 28.8351
13.227 6883.97 2013.74 0.29252 62.1264 963081.8305 98.8454 3369.47 37 38.0714
13.294 5950.24 2004.19 0.33682 53.8801 804759.9025 81.7137 2708.32 38 41.7013
14.903 22539.2 10403.8 0.46158 200.571 3031849.4742 365.225 5501.04 85 24.0681
2.129 5794.36 1354.57 0.23377 63.9527 725580.5945 86.31 3114.13 17 39.4213
18.657 9585.89 3632.67 0.37896 74.7818 1344319.2062 139.223 4487.48 29 32.6283
5.704 16813.1 6075.86 0.36137 195.778 2435917.7251 286.076 5467.68 99 23.995
6.556 7759.48 2832.22 0.365 59.2563 1070126.3703 107.881 2992.08 61 39.5234
19.13 16225.1 4595.03 0.2832 189.164 2241374.8612 188.097 5733 125 25.2733
10.19 4323.23 1670.73 0.38645 35.8344 605181.1032 55.9843 1458.59 36 44.5184
19.915 20527.4 7168.87 0.34923 177.68 2856423.806 283.211 5939.1 201 21.0565
2.582 6614.12 1966.32 0.29729 66.3089 903449.6935 92.6876 3086.87 47 39.4964
1.837 21083.3 5715.2 0.27107 291.84 2841080.5492 311.88 6570.13 286 19.4956
5.633 4110.9 1028.22 0.25012 37.392 562297.2353 49.4445 1366.34 13 44.6827
16.754 7787.71 1558.35 0.2001 74.7961 1093255.7596 82.1524 3225.93 23 35.3611
17.772 6614.23 1987.74 0.30052 89.9908 912596.7311 87.0909 3424.89 19 37.5776
12.515 6939.8 2581.41 0.37197 70.3654 936245.5787 93.1755 3414.17 42 38.3101
19.729 10251.5 2378.31 0.23199 101.021 1430841.4901 129.416 3966.14 51 33.8974
2.5 7247.21 2423.23 0.33436 75.6787 999571.0907 96.5455 3743.61 29 36.0409
1.47 8427.51 2098.04 0.24895 90.024 1164420.7088 99.3416 3957.3 49 34.9526
2.558 8300.91 2601.45 0.31339 84.7694 1178946.4616 116.369 3961.75 44 35.0367
17.263 16031.4 6711.04 0.41861 153.264 2256550.9796 248.612 5663.98 72 29.2383
8.587 6429.49 1815.46 0.28236 61.4201 918580.8861 86.6369 2403.72 30 46.5464
19.146 11922.3 4197.29 0.35205 111.202 1706705.192 155.943 4020.02 120 32.4583
4.43 10622.4 2626.68 0.24727 109.253 1500023.17 149.006 4310.99 68 32.9141
6.992 16044.7 5138.09 0.32023 183.785 2222929.7583 264.47 5336.79 97 26.3708
13.551 5274.49 1309.79 0.24832 41.8047 734831.2276 78.9285 2724.78 23 41.3848
1.95 10863.7 2611.79 0.24041 141.951 1537836.1963 166.118 4690.18 27 29.1398
3.252 10957.2 3210.85 0.29303 129.937 1548671.475 180.35 4452.01 42 31.6831
6.229 11315.7 4089.4 0.36139 130.309 1587009.5237 193.125 4433.67 82 32.2119
15.703 9846.83 4162.51 0.42272 53.0018 1380937.1882 174.435 3579.34 90 36.0538
4.364 6984.91 2305.57 0.33007 65.3999 988835.6493 83.8363 3961.27 50 37.5035
11.247 5298.63 1756.95 0.33158 39.6587 732136.7352 77.7545 2691.37 41 41.3643
2.446 8775.95 2864.03 0.32634 94.8669 1185005.4808 124.111 3363.74 80 37.9839
4.828 9867.27 3659.54 0.37087 94.4815 1403813.478 148.044 3733.67 31 35.8785
1.996 13362.5 3958.67 0.29625 199.471 1831323.6112 221.164 4566.44 183 29.076
8.872 6076.02 1813.24 0.29842 57.1848 863581.9366 74.5822 2495.01 66 41.7516
6.564 6662.05 1735.41 0.26049 62.0389 930904.391 78.0147 3274.28 38 37.6824
18.412 15737.9 4304.05 0.27348 159.011 2297272.8503 250.552 4466.99 110 30.2252
7.795 7912.92 3502.04 0.44257 69.1607 1113873.7083 117.495 2448.84 69 40.162
13.636 6992 2016.29 0.28837 61.8592 969999.8973 105.714 3037.72 4 39.8354
2.55 14082.2 5087.15 0.36124 198.526 1934622.607 242.657 4698.18 35 28.5023
3.167 14922.4 4896.7 0.32814 180.256 2180481.6162 258.209 4991.73 87 26.6582
1.828 17378.5 5988.58 0.34459 224.854 2389212.8737 283.04 5483.6 234 23.3287
2.028 6086.46 1973.37 0.32422 58.7591 841357.9735 92.4355 2705.25 43 40.5542
12.293 9077.35 2184.21 0.24062 99.2385 1279692.1914 126.452 3853.93 52 34.1078
1.625 7362.83 2187.08 0.29704 81.8115 1011581.0791 102.824 2838.59 110 38.7709
1.9 11194.6 3561.94 0.31818 129.249 1516719.7302 174.018 4101.3 29 33.185
1.628 8153.01 2759.05 0.3384 88.2885 1154749.0101 123.615 3217.48 25 37.6921
2.184 16460.6 6524.31 0.39635 187.314 2291907.7513 269.442 4959.46 33 25.9756
1.782 5615.47 1848.15 0.32911 58.8157 804845.0502 82.3223 2495.9 41 40.3972
8.66 7335.25 2233.57 0.30449 61.0067 989192.484 102.831 3525.26 60 37.9715
1.994 3827.35 1142.52 0.29851 35.0386 521688.5501 48.3092 1377.11 17 44.379
2.085 3786.09 951.68 0.25136 34.2986 536778.6163 46.1171 1764.59 11 44.4613
3.623 9252.13 2295.69 0.24812 101.548 1290641.8037 127.69 4017.36 39 34.7162
2.117 7849.3 2277.31 0.29012 85.8511 1116916.6709 109.992 3818.01 48 35.7791
1.84 9452.72 2370.81 0.2508 100.952 1332036.7161 142.94 3935.91 46 33.4059
14.156 7341.55 2180.78 0.29704 71.9098 1020870.5206 95.6715 3282.54 38 37.8103
4.46 16458.1 4668.06 0.28363 240.16 2256740.8012 270.259 4808.2 282 27.8838
1.896 10703 3651.28 0.34114 97.6169 1496067.8434 160.021 5367.87 51 32.4653
4.553 7992.98 2066.62 0.25855 77.429 1090085.7499 105.256 3766.71 36 35.9457
7.084 8803.26 2999.34 0.3407 76.4787 1195285.6289 121.418 3392.93 106 35.1985
2.187 8386.68 1860.81 0.22187 83.1233 1182947.0992 103.61 3806.27 19 34.0551
16.912 6993.99 1780.52 0.25457 61.3139 954416.2197 85.5827 2900.24 28 40.3155
16.846 9285.26 3972.89 0.42787 92.3125 1322814.0349 140.133 3645.89 34 35.309
16.613 5539.99 1213.12 0.21897 54.9931 770029.0408 72.7009 2738.65 69 40.6977
2.131 5999.09 2153.61 0.35898 59.1306 841127.951 89.2236 3369.72 83 38.7871
6.438 16453.9 5826.45 0.3541 198.567 2344674.2822 309.981 5455.1 238 23.6618
11.893 7147.59 1871.04 0.26177 74.8367 960526.8921 97.2701 3611.72 85 36.3561
3.678 9151.02 2376.89 0.25974 82.5835 1301087.179 121.941 3952.12 65 34.6989
1.769 12232.3 2695.44 0.22035 143.865 1699784.5286 191.38 4132.96 65 32.1894
2.65 15197.8 5058.97 0.33287 175.251 2120876.2881 238.741 5496.06 215 27.6396
0.972 22483.8 5470.9 0.24332 336.753 3081225.4484 400.458 6237.97 157 19.8088
2.333 9275.1 3059.07 0.32981 104.155 1269520.7288 152.134 3311.72 10 46.5464
1.599 9558.47 2907.72 0.3042 98.6186 1318031.3965 141.563 3567.15 121 34.9579
2.786 5945.33 1392.57 0.23422 51.1082 842892.0593 76.6998 3285.8 25 38.6908
17.199 9538.67 4232.44 0.44371 73.2361 1292419.1477 155.197 3226.83 33 36.4724
3.62 7845.45 2492.75 0.31773 72.8994 1060514.6029 116.38 3442.38 82 36.1065
0.521 7780.17 1973.67 0.25367 92.5959 1081506.5966 126.097 3211.99 5 37.0007
5.702 11887.3 3799.54 0.31963 119.523 1636986.793 210.662 4088.64 69 32.3138
20.706 13135.5 4672.04 0.35568 119.087 1791333.9006 198.968 5356.38 89 33.6979
1.931 15364.3 5633.35 0.36665 183.776 2150126.1947 256.234 4587.95 37 25.7755
15.037 8488.51 2167.15 0.2553 74.7181 1157725.7436 101.441 3799.89 90 34.402
0.453 8872.1 2385.42 0.26886 101.72 1247879.5612 130.369 3232.4 4 36.9571
13.722 7768.87 2559.21 0.32941 59.3381 1105294.3692 110.178 4693.64 17 36.0637
13.917 5620.72 2444.91 0.43498 39.9646 741846.3344 96.6698 3831.07 20 40.7984
11.841 5809.05 1822.46 0.31372 53.824 779836.2949 85.7691 3044.35 66 39.9207
4.408 7886.71 2415.26 0.30624 70.0888 1069633.8827 106.498 3460.35 87 36.8911
2.241 13170.1 3443.95 0.26149 169.765 1856252.2694 205.29 4943.7 206 28.1682
1.249 14807.4 3965.34 0.26779 185.52 2093544.2124 211.167 5685.2 70 23.0616
3.637 6003.77 1866.35 0.31086 59.771 814233.419 79.5982 2409.71 15 40.9616
16.448 5277.75 1080.35 0.20469 60.0515 710231.4841 60.7453 2732.45 65 41.0204
4.883 10485.5 3100.89 0.29573 104.574 1455668.7892 135.538 4647.66 30 32.5697
1.819 14367.7 4978.12 0.34647 161.248 2030917.4084 217.478 5897.59 69 24.9411
4.225 7107.65 1975.9 0.27799 68.7349 979037.603 95.143 3233.52 34 38.2404
2.527 9797.55 2419.16 0.24691 142.103 1382716.9486 156.051 4153.45 116 32.2402
4.619 6844.31 1989.91 0.29073 66.2805 947888.3672 89.8702 3900.47 72 37.6467
1.82 9705.68 2786.31 0.28708 101.353 1328075.5452 149.891 3973.66 122 32.7918
3.828 7919.79 2040.53 0.25764 86.9105 1079284.4462 122.645 3843.68 34 35.468
17.355 9103.92 3868.11 0.42488 102.713 1201501.5986 149.814 3349.44 95 37.729
15.126 13846.7 4786.19 0.34565 161.02 1956033.8238 167.86 5023.64 49 29.1109
0.492 11729.6 2335.26 0.19909 153.122 1593902.1156 192.383 4825.07 143 29.8443
1.905 6390.94 1680.95 0.26302 68.918 910607.0914 78.4507 3104.73 11 38.4537
10.415 4368.15 1385.82 0.31725 30.516 612652.5775 53.9309 2083.09 43 44.272
3.606 12602 3381.32 0.26831 161.695 1742205.8159 206.09 4781.49 72 28.5801
4.012 7783.94 3194.46 0.41039 89.1562 1079127.2533 126.253 3494.73 109 36.2175
0.569 8103.83 1987.97 0.24531 93.6066 1131326.2449 122.716 3252.07 4 36.5516
4.793 14151.8 3515.86 0.24843 129.242 2004778.1317 172.189 5244.78 35 28.3666
3.638 5024.62 1218.15 0.24243 43.4839 716665.1095 61.8947 2308.35 17 42.4766
15.641 11597.1 4971.52 0.42868 109.546 1558121.5048 180.591 4651.54 76 32.8727
13.634 11391.4 3673.92 0.32251 86.343 1526737.4593 169.862 4190.81 7 33.2469
12.813 5659.65 2125.2 0.3755 51.8772 764048.6524 89.7438 2398.48 32 38.5085
11.916 6839.42 2082.92 0.30454 61.7346 952400.4568 102.268 3361.41 74 36.9064
17.615 6202.7 894.33 0.14418 54.8858 864113.6742 74.0888 2664.66 45 40.863
2.16 4115.57 782.99 0.19025 40.4972 543751.2761 59.8348 2561.94 13 43.1684
10.08 4952.44 1206.2 0.24355 50.0222 699640.832 55.3601 2342.02 81 42.2922
8.634 13017.3 5291.63 0.4065 151.887 1840264.8555 233.9 5180.57 31 28.6164
2.441 21742.3 7831.48 0.36019 142.048 2921649.0638 357.865 24250.93 107 30.7853
0 7888.73 1768.04 0.22412 85.4278 1059677.7153 129.612 3496.92 10 37.3004
12.419 9663.62 3713.11 0.38423 97.3078 1371826.4516 150.634 3988.72 89 35.3615
3.55 8799.61 2115.24 0.24037 102.336 1250065.8022 133.522 3825.95 61 35.0942
16.36 6017.84 1993.92 0.33133 67.2614 806205.0396 95.1141 3041.41 45 39.5865
12.735 6977.85 1821.75 0.26107 73.8213 978223.718 91.3655 3163.36 38 37.3643
19.201 9480.02 2547.57 0.26873 87.9228 1296959.7634 127.073 3673.54 82 35.9989
17.546 14170.8 4907.59 0.34631 127.531 2058571.8172 183.733 5356.48 83 26.4632
1.43 7989.06 1931.66 0.24178 71.1722 1167186.3064 93.0897 3060.41 20 37.8763
9.557 12493.2 4804.33 0.38455 110.236 1778196.3796 169.463 4185.12 75 33.0678
1.169 5439.58 1191.14 0.21897 53.3809 769962.7619 70.951 2971.26 58 40.1634
1.471 14538 2922.44 0.20102 170.136 2061941.7219 205.103 4051.35 133 32.2136
11.678 4106.17 1401.1 0.34121 37.444 553351.8063 55.618 1405.17 31 44.2123
2.437 5897.13 1666.01 0.28251 64.228 738028.3307 92.4664 3109.96 22 39.3505
7.625 7398.57 2384.22 0.32225 80.8382 969087.7544 119.422 3311.15 68 37.4512
15.872 10710.2 4604.11 0.42988 96.3604 1499626.2259 149.947 3956.08 51 37.3836
15.644 9148.61 3835.3 0.41922 84.5002 1266292.6414 134.007 5033.19 49 35.1763
1.37 6952.47 2743.51 0.3946 61.6436 1014025.1729 91.9961 3222.6 31 38.8506
3.649 13013.8 3971.51 0.30517 176.523 1817275.2238 194.143 4637.55 104 29.5065
9.78 4060.17 1187.48 0.29247 40.6307 551841.9211 58.1804 1409.25 11 45.238
9.559 17723 6252.09 0.35276 201.701 2454618.3363 323.306 5847.7 229 21.781
2.856 8788.05 2593.86 0.29515 98.2758 1223743.0414 110.914 4133.92 119 34.0331
11.197 20281.4 6971.02 0.34371 211.512 2793165.8813 337.598 6089.74 207 20.3429
19.225 15312.5 5617.84 0.36687 185.916 2119942.2221 239.716 5153.44 135 27.044
3.978 9015.98 2720.96 0.30179 100.403 1254974.9671 123.491 3469.86 18 36.3033
2.285 4819.29 853.17 0.17703 41.8938 650524.5391 66.4518 2641.46 10 42.8042
14.925 12539.3 4723.03 0.37665 133.93 1752494.0883 186.165 5199.2 82 29.62
3.005 11236.6 2470.92 0.21989 129.691 1536857.3973 155.678 3776.4 23 33.9003
2.237 9889.14 2631.95 0.26614 121.03 1356542.7068 139.132 4160.72 127 28.2546
1.234 8387.42 2076.01 0.24751 97.0493 1114341.2159 127.654 3495.19 13 36.6133
2.424 6507.99 2439.17 0.37479 64.589 899269.0952 97.8152 3637.21 66 37.2686
6.322 14831 5222.33 0.35212 195.334 1962547.2929 244.1 5231.91 77 26.8006
3.017 10114.9 2765.92 0.27345 98.6029 1422229.1777 137.711 3610.58 126 35.5373
13.419 10700.1 3648.83 0.341 102.902 1488205.3501 168.69 4347.26 70 32.7843
2.988 7577.4 2756.59 0.36379 79.5224 1038415.0654 94.3874 3364.03 58 38.6555
3.51 4570.94 986.93 0.21591 45.5256 644259.7356 59.1073 2604.88 17 41.9735
16.565 8150.98 1342.12 0.16465 73.6927 1139873.8671 84.0934 3266.87 34 37.2745
4.353 14912.3 5181.97 0.34749 152.54 2054800.4268 227.229 5193.15 64 26.4818
1.074 5077.48 1115.36 0.21966 46.5064 724528.4089 59.7319 2211.51 71 42.775
1.986 9911.04 2498.21 0.25206 131.456 1368546.1787 156.189 4652.85 75 29.9129
14.788 6181.56 2287.21 0.37 51.2151 822887.1846 101.4 2860.35 61 40.1837
3.501 5571.28 852.05 0.15293 51.013 762048.5987 59.4251 3009.92 17 39.7587
2.056 9644.38 2486.4 0.2578 81.0892 1375887.6066 115.113 4294.34 92 33.7464
6.73 5835.09 2114.1 0.3623 53.1789 792894.2834 84.9029 3199.6 25 39.3148
20.984 14568.3 4889.13 0.3356 171.17 2082651.4797 221.307 6995.04 80 21.091
15.94 5990.33 1367.81 0.22833 41.6325 814678.9595 90.0008 3039.94 27 41.3418
10.226 8813.42 2540.83 0.28829 78.2165 1261645.905 113.064 3603 23 36.2029
12.67 6001.6 1731.09 0.28843 55.7944 820445.0505 84.6195 2455.92 27 40.7241
5.147 6471.41 1833.09 0.28325 55.004 851177.93 103.108 3586.03 20 39.1586
4.416 7682.67 2437.19 0.31723 71.1154 1085616.5229 93.3099 3437.67 40 35.8608
1.859 10796.6 2993.13 0.27722 106.73 1520131.0284 163.416 4158.11 36 32.2415
1.018 7797.9 1683.56 0.21589 76.1374 1114737.7837 108.447 4040.13 104 34.9581
12.342 11147.8 2939.94 0.26372 97.9976 1531659.3427 143.342 4706.25 44 31.7066
0.993 9645.02 1836.57 0.19041 108.368 1376084.4177 127.257 4194.48 47 31.9885
2.415 8323.35 1813.42 0.21787 81.5648 1174039.8686 109.118 4025.25 39 35.2536
2.03 10255.1 2590.15 0.25257 115.663 1426682.9401 129.9 4280.28 59 33.5904
10.082 18071.6 6163.93 0.34108 218.468 2471821.368 367.615 5800.02 214 24.019
10.32 4774.15 1491.72 0.31245 30.921 665350.1064 60.3365 2020.28 46 44.3453
15.198 7938.59 1344.09 0.16931 62.8624 1113233.191 78.7747 3152.51 28 38.142
13.503 8066.74 2976.99 0.36904 64.6774 1144765.6749 111.824 4144.21 69 37.6988
3.061 14653.8 3938.51 0.26877 151.703 2095020.4082 211.817 4665.15 63 28.6545
3.968 16276.6 4586.12 0.28176 252.01 2234395.5175 259.811 4839.53 291 27.3417
13.821 9097.04 2892.65 0.31797 62.3238 1283562.6969 110.946 3044.45 50 37.1704
15.79 7625.97 3061.17 0.40141 79.9804 1051961.3022 120.656 3812.7 39 32.2426
1.75 8666.76 2230.57 0.25737 115.343 1186963.2024 133.862 4169.98 61 34.0885
5.372 14868.1 4625.42 0.31109 175.939 2054638.8361 232.271 5365.62 117 23.8653
2.195 14472.4 4201.75 0.29032 210.97 1968705.2463 246.474 5272.19 128 25.141
2.292 13488.2 3033.77 0.22492 203.769 1870448.3961 236.207 4968.56 128 26.6967
2.9 14642.1 4871.01 0.33267 171.941 2140652.2119 271.688 5081.69 60 27.0813
1.668 7037.81 1994.83 0.28344 71.1166 964283.2267 103.381 3700.13 18 36.8887
6.895 15327.8 5491.81 0.35829 182.608 2181667.9597 260.461 4653.83 47 28.2438
14.421 9315.78 2669.93 0.2866 87.3551 1301661.4359 117.826 3937.68 48 35.5924
16.109 9383.05 2619.02 0.27912 76.7215 1283322.6533 105.819 4134.38 41 34.5722
1.413 11757.9 1984.58 0.16878 144.133 1654987.351 159.096 4673.36 154 29.4997
9.746 16388.3 5619.41 0.34289 181.165 2265214.0007 259.577 5704.11 116 30.1467
1.949 8390.82 2656.09 0.31654 98.9836 1146886.1953 146.574 3260.86 8 36.588
10.719 4247.62 1079.61 0.25416 42.7713 549292.0164 68.3489 1783.51 38 43.9664
5.427 14186.7 4993.11 0.35195 168.957 1963769.6224 202.207 5037 146 27.4526
3.681 10460.5 3619.8 0.34604 119.077 1446060.1125 184.527 3851.1 31 32.8985
8.334 17119.1 6608.7 0.38604 176.625 2358836.0224 293.693 5385 114 24.3204
1.789 6271.04 1622.75 0.25876 67.4312 894591.1728 77.2745 3096.87 7 38.9464
1.284 6395.7 2342.71 0.36629 80.1922 869906.7741 92.917 3215.39 58 38.7275
6.987 15276.2 6094.42 0.39894 187.678 2044488.0388 285.614 5703.18 79 26.5693
1.456 15425.7 4165.37 0.27002 179.4 2177377.3059 218.58 5658.63 65 22.7552
6.078 14628.8 3222 0.22025 170.777 2065902.807 226.278 4908.51 96 25.2166
4.308 15642.4 3758.58 0.24028 231.468 2145954.8208 260.829 4819.75 293 27.7026
1.11 5219.29 1051.56 0.20147 44.3779 754800.3702 60.6026 2187.44 77 42.8304
1.447 8971.76 2343.61 0.26122 93.3564 1255275.8798 137.219 4046.03 167 33.5387
20.72 15700.1 6023.68 0.38367 151.213 2138281.4062 239.955 4581.28 68 29.8605
9.802 8408.9 2741.59 0.32603 62.5225 1119332.8259 126.09 4420.06 54 35.9078
16.894 11572.4 4284.28 0.37021 104.407 1631768.15 145.23 4032.51 49 35.8557
16.106 6857.19 2293.52 0.33446 48.5066 883792.3764 102.254 2685.86 32 42.9553
2.521 9283.57 2754.92 0.29675 96.7233 1299319.2969 128.753 3499.2 11 36.0423
13.815 7584.72 3042.68 0.40115 56.0875 1025921.4337 117.032 3110.85 36 39.7239
1.42 8467.86 2168.86 0.25612 98.5877 1148939.613 126.56 3469.94 11 36.8769
2.824 7872.37 3169 0.40254 79.3046 1109639.1171 123.534 3305.25 45 37.7798
5.022 16284.3 5507.19 0.33819 156.881 2268103.0118 246.943 5117.44 108 26.5823
14.494 10039.5 3628.21 0.36139 80.7946 1368800.2212 131.846 4408.9 36 34.3212
7.246 6394.05 1464.47 0.22903 66.7489 901037.413 75.8904 2849 71 39.3085
16.149 9184.76 2744.22 0.29877 96.0894 1285581.0158 146.23 4253.79 111 32.1313
12.62 6276.02 2180.27 0.34739 66.4194 829829.2859 100.47 3187.8 54 38.9633
9.858 22242.6 6937.6 0.3119 250.023 3089188.8046 354.538 5938.95 236 23.919
10.112 14169 5064.08 0.3574 178.638 1929303.2698 241.452 5105.77 117 26.2482
2.227 5649.4 1479.92 0.26196 57.4623 707745.2911 88.4986 3083.65 16 39.4904
6.999 7304.79 2021.55 0.27674 63.1197 1001473.0163 96.6195 3205.75 41 39.5535
5.23 8708.47 2450.95 0.28144 84.0206 1231833.1139 124.938 4168.02 77 34.0564
2.773 11155.7 2974.39 0.26662 127.055 1549864.0933 169.75 4355.13 53 31.9108
13.848 8480.92 2155.02 0.2541 76.575 1147192.5919 98.443 4007.38 87 37.0384
1.197 7654.9 1927.23 0.25176 67.0177 1054524.3677 106.102 3666.11 22 37.7869
16.295 8407.04 2979 0.35434 67.2697 1188133.8095 121.873 4112.76 37 39.4255
15.127 10815 3172.81 0.29337 99.2693 1478520.241 137.01 5718.39 39 30.1368
2.661 9863.81 2708.08 0.27454 118.704 1352419.7329 137.478 4164.17 132 32.8557
8.253 5418.4 1965.94 0.36282 45.7249 783277.6205 69.4959 3467.14 40 41.9094
14.729 17859.3 6899.24 0.38631 127.737 2385463.7469 266.022 5544.91 157 23.1931
3.541 12496.1 3505.31 0.28051 169.75 1740266.0088 200.005 4771.1 62 28.2337
3.532 9323.47 2943.66 0.31572 93.1457 1347007.9042 132.108 3405.07 6 35.9576
1.491 13964.3 4411.19 0.31589 168.1 1930084.8217 214.447 5228 195 27.4568
10.56 4951.22 873.85 0.17649 40.2888 681695.6014 58.2421 2499.68 24 41.7688
3.387 16119 4806.41 0.29818 213.858 2220976.1453 296.155 5244.55 184 25.1809
4.799 16159.9 3991.71 0.24701 185.057 2269018.3246 230.782 5245.91 223 46.5464
2.752 8782.54 3038.89 0.34601 128.887 1159557.8588 173.309 4292.39 184 29.6449
13.81 6719.37 2263.03 0.33679 70.2352 934951.8832 117.485 2926.85 74 40.3756
13.428 5049.75 949.82 0.18809 41.2957 690622.9283 70.4142 2734.59 27 41.1366
3.486 11552.2 3023.57 0.26173 147.897 1533311.143 173.372 4553.94 65 30.8936
4.516 10401.4 4458.67 0.42866 82.597 1452881.6375 174.68 5242.84 104 33.79
15.752 14228.3 4444.36 0.31236 142.083 1983640.2415 231.816 4961.92 92 28.3211
1.285 13686.7 4338.65 0.31699 158.297 1892157.5845 218.1 5232.65 184 27.0316
1.331 6043.87 1286.38 0.21284 53.7115 841014.1028 77.5441 2702.19 17 40.8614
1.943 7072.94 2114.95 0.29901 66.1413 979663.1561 93.7013 3086.31 50 39.618
2.274 10753.3 2620.84 0.24372 129.652 1489204.1021 154.313 4335.47 93 31.4257
7.254 9686.93 2884.07 0.29772 92.7195 1380059.9133 128.591 4181.24 88 33.1551
20.178 24513.6 6863.55 0.27998 225.612 3457542.5889 310.385 6288.3 296 18.6766
2.543 4224.66 1080.82 0.25583 35.7642 566268.7428 51.7913 1401.47 17 43.9575
2.803 10838.5 3171.25 0.29259 128.021 1484221.3343 157.369 4870.15 70 29.5718
8.975 13040.1 3195.34 0.24503 152.516 1852821.3938 194.497 4633.35 109 30.9275
7.957 12736.7 3815.54 0.29957 153.148 1762886.7891 197.009 4748.17 67 29.1701
7.571 5416.17 2471.53 0.45632 48.0967 738668.5886 94.0223 2192.91 7 41.538
2.04 7481.55 1797.22 0.24022 70.4857 1069247.0349 98.3523 3097.3 11 37.6357
18.888 9444.34 2906.55 0.30775 72.7827 1348922.3293 110.661 4393.68 29 30.9044
1.559 15177.2 3739.7 0.2464 183.632 2118340.249 227.235 4734.18 37 28.2784
2.492 9233.47 2086.74 0.22599 95.9435 1290540.0596 129.042 4252.55 46 33.4119
1.822 12070.8 3208.54 0.26581 155.957 1724094.9921 166.958 4689.23 30 29.1386
3.758 21264.6 7181.28 0.33771 241.976 2968829.5307 337.258 5558.31 82 23.0835
11.826 8972.46 2721.26 0.30329 79.5633 1270596.46 120.918 3878.65 53 34.8604
14.85 5794.99 1771.97 0.30577 37.6207 795940.9952 75.5434 2694.36 5 41.1624
14.939 16456.8 5815.14 0.35335 154.301 2339119.4595 282.988 7767.5 142 28.6678
8.332 7725.89 2859.45 0.37011 72.6212 1039413.5646 114.618 3843.09 66 33.9883
4.299 15679 4343.08 0.27699 211.572 2167166.4499 255.861 5149.28 175 25.1605
1.57 7362.8 1694.63 0.23016 69.1988 1001499.4312 104.519 3595.97 25 37.3134
13.677 9179.6 2077.89 0.22635 78.0049 1218813.5494 118.376 3375.65 29 38.0526
16.307 10423.2 3412.37 0.32738 106.586 1441174.2065 149.635 4800.65 42 31.3278
15.725 17509.1 5809.93 0.33182 158.759 2405843.0291 277.718 5744.02 142 24.8388
2.322 17080.7 5485.88 0.32117 207.663 2244678.7915 259.484 6160.79 236 22.0831
16.055 8034.02 2827.56 0.35194 82.4411 1098125.0338 106.034 3473.46 37 36.9193
2.754 11354.8 4011.5 0.35328 128.822 1575132.0983 191.63 4198.27 32 30.2317
3.788 12747.4 4311.54 0.33822 175.963 1792011.063 212.087 4848.97 66 28.1975
1.95 7979.86 2189.2 0.27434 73.0458 1163828.7657 97.6168 3095.16 15 37.2278
2.149 5732.42 1578.29 0.27532 62.5448 722983.6016 85.2453 3093.02 20 39.4148
12.338 10316.4 3783.4 0.36673 77.682 1392407.0333 146.119 4948.97 94 38.6558
16.065 11876.5 3327.95 0.28021 111.989 1676008.9822 152.417 4640.77 171 30.8387
2.232 8905.02 2290.86 0.25725 85.7951 1199836.9967 118.626 3812.39 44 35.4556
2.207 10857.4 2468.69 0.22737 121.843 1470857.0179 161.957 3643.46 21 33.3337
14.97 8899.65 2731.34 0.3069 74.115 1257800.1714 112.73 3440.32 42 36.073
3.657 5151.09 1600.11 0.31063 46.1302 727938.8657 71.9534 1976.8 4 42.4805
7.097 10494.8 3252.19 0.30988 112.513 1522201.4203 145.547 4290.61 68 32.5557
1.628 9025.31 2608.97 0.28907 100.595 1229790.5414 125.472 3593.05 120 35.1067
18.469 5984.92 1463.04 0.24445 68.0346 850316.9257 74.8282 2792.86 66 39.7712
1.887 6341.67 2190.95 0.34548 80.6568 873495.7215 94.5871 3156.81 66 37.9388
2.572 16789.2 4461.58 0.26574 182.787 2318023.953 217.761 4126.64 126 31.7237
1.471 8995.3 2429.97 0.27013 92.5152 1237218.1342 145.731 3266.11 9 36.6309
2.172 5946.23 1901.77 0.31982 58.2931 816899.2852 84.577 2689.3 44 40.5881
1.164 6089.82 1334.06 0.21906 53.6947 837075.0601 77.0149 2790.97 18 40.3417
16.659 7242.82 2912.69 0.40214 52.3954 1021421.7522 109.762 3749.36 66 36.8635
18.069 8086.71 2345.38 0.29002 78.5614 1103534.5893 104.356 4372.04 102 31.9493
18.756 9003.81 4053.33 0.45017 85.684 1243689.3997 143.836 4516.37 81 33.1745
19.168 9380.33 2715.39 0.28947 71.8843 1253948.5345 128.04 3334.63 45 38.8746
12.151 5222.25 1975.84 0.37835 41.0944 693755.48 93.2057 2967.48 22 42.9082
2.489 13493.2 4119.86 0.30532 183.79 1897543.8111 237.025 4438.38 30 27.3834
5.408 15164.6 4434.7 0.29243 173.624 2085999.4989 228.298 5617.8 74 23.1508
1.6 8234.12 2143.51 0.26032 95.4872 1115048.9763 127.671 3472.12 11 32.1251
16.34 6997.3 1876.51 0.26817 55.0696 1007615.6249 76.2889 3301.81 26 36.7774
14.982 5321.75 2085.65 0.39191 45.6096 759397.5265 95.8355 2305.93 62 41.7453
1.469 15827.5 3136.57 0.19817 172.623 2238125.5383 200.458 4282.78 147 31.1916
13.986 8484.68 2609.88 0.30759 54.3811 1151646.2247 115.571 3918.13 22 36.0608
1.485 21634.3 7265.01 0.3358 192.885 2893908.5039 316.75 6654.05 222 18.6152
17.559 8837.02 4050.08 0.4583 64.5159 1257114.0382 128.932 3387.88 63 36.0647
13.01 8646.97 1895.57 0.21921 93.9689 1155989.4779 122.277 3902.49 42 40.0517
15.285 8807.13 3514.27 0.39902 87.834 1232606.5567 141.526 3234.3 63 35.3143
16.255 6220.34 1730.92 0.27826 56.7479 801191.2448 87.4077 3061.48 50 39.7948
14.451 6127.62 1450.72 0.23675 69.9263 869420.6346 72.1174 3090.87 11 38.0966
0.985 8857.61 2508.61 0.28321 104.128 1231023.9388 139.226 3273.4 5 36.8462
1.43 7459.32 1649.39 0.22111 85.9682 1039287.302 103.512 3918.84 29 35.9681
2.879 7413.96 3115.56 0.42022 79.7735 1044703.5287 116.16 3305.57 45 37.4412
5.115 8012.87 2493.62 0.3112 94.8372 1083942.0118 129.607 3867.43 38 35.4204
14.77 7986.06 3189.18 0.39934 37.5397 1040202.9609 125.918 3421.18 58 38.0129
1.962 9498.06 2212.38 0.23292 104.302 1304494.199 147.688 4012.4 40 34.0345
17.952 9436.13 4550.91 0.48228 97.1573 1313852.7469 159.601 3845.59 13 36.0442
6.512 5494.3 1625.49 0.29585 45.0351 760868.8202 60.8914 1954.2 23 43.4404
20.81 14310 5896.81 0.41207 184.009 1953779.5259 290.482 4517.68 159 29.3117
1.368 7942.48 2122.35 0.26721 88.4396 1134003.826 122.779 4130.55 101 34.505
0.772 7955.23 2094.31 0.26326 82.4805 1096192.5269 113.637 3106.9 20 37.0918
1.495 10689.9 3598.92 0.33666 132.685 1433297.5241 171.779 4155.4 46 33.4459
1.737 7615.85 2080.87 0.27322 84.5167 1079619.1213 111.032 3812.16 42 33.0501
16.121 12301 4136.97 0.33631 97.491 1709623.1195 179.401 5430.66 55 30.6125
18.522 13664.3 4435.43 0.32459 158.694 1876710.9301 212.875 3985.16 121 31.918
9.005 16037.8 4644.63 0.2896 204.031 2224910.4401 281.477 5738.07 231 19.764
12.695 6190.44 1910.69 0.30865 61.8631 802878.1567 87.1732 2869.04 5 39.5347
1.713 4367.01 1754.64 0.40179 36.691 608031.3964 65.6492 1967.45 19 44.4753
2.392 7116.62 1870.84 0.26288 89.2792 996369.779 102.09 3929.73 24 35.683
6.063 4390.04 984.25 0.2242 30.9165 631223.241 50.4692 1168.45 40 46.5464
2.244 9390.63 2159.85 0.23 105.998 1275969.268 131.137 3933.52 50 32.351
16.934 7039.21 2181.01 0.30983 72.5927 1032257.2924 84.1222 3400.16 30 38.9741
17.534 8075.95 3209 0.39735 64.5187 1110837.9626 115.192 3469.48 43 36.1849
6.394 6111.9 1351.72 0.22116 50.7831 826336.6606 83.7589 3231.22 43 39.3057
10.795 4889.41 1157.66 0.23676 38.9221 664258.2446 57.6767 2574.9 50 41.8549
17.456 12136.4 3304.18 0.27225 119.98 1704082.1577 127.6 4848 57 33.0507
11.268 5949.61 1432.87 0.24083 51.9128 857033.5338 72.6923 2426.44 49 42.0513
12.51 6569.68 1716.41 0.26126 72.8111 912169.8824 90.0063 3086.18 42 39.0959
16.754 7787.71 1558.35 0.2001 74.7961 1093255.7596 82.1524 3225.93 23 35.3611
2.41 4964.18 1508.44 0.30386 44.3075 690984.619 60.4533 1872.73 19 43.7247
17.848 10067.7 3586.92 0.35627 79.318 1409603.5304 131.859 5279.76 60 30.4537
19.266 12254.9 3898.74 0.31813 113.414 1779304.294 177.377 3615.55 158 36.1735
3.272 19491.9 6126.7 0.31432 248.358 2704481.4577 334.516 5493.96 72 23.3285
12.082 8008.63 2508.37 0.3132 65.663 1158199.3468 94.0233 4172.22 34 37.9957
8.645 5750.82 1405.96 0.24447 54.9481 784916.7218 85.7215 2851.49 45 40.9949
17.449 14559.8 5335.04 0.36642 133.528 2123508.8689 223.55 4819.91 90 28.4017
1.525 7641.81 1880.72 0.2461 86.0571 1068577.3392 106.427 3859.14 27 36.056
17.19 17438.8 6580.8 0.37736 226.288 2382045.891 360.614 4927.14 239 26.3808
2.329 10766 2994.81 0.27817 126.897 1485880.8623 175.256 4129.98 43 31.3338
18.078 11012.4 3920.71 0.35602 121.689 1580146.1784 179.257 4001.49 140 34.795
3.923 16651.5 5430.9 0.32615 166.192 2325210.3035 277.812 4798.18 116 28.7777
1.905 13164.6 3307.36 0.25123 187.568 1802297.2991 207.192 4564.7 172 28.8032
5.52 13826.7 5231.28 0.37834 184.838 1829712.026 254.264 5075.39 63 23.1639
14.949 8108.4 2266.14 0.27948 81.7113 1094563.2424 102.402 3917.14 39 37.9419
2.519 5740.49 1545.32 0.26919 62.9145 725399.9228 85.9725 3103.31 20 39.4333
18.048 10961.8 2695.59 0.2459 99.0471 1532802.879 122.691 4300.12 50 30.6418
2.406 9534.78 3004.15 0.31507 101.656 1320295.602 132.753 3947.44 25 33.6845
4.722 6058.42 1809.7 0.2987 64.7164 774551.414 87.9589 3048 32 40.2058
2.078 16819.8 5402.57 0.3212 210.144 2217450.8649 273.153 6217.63 250 21.6686
7.64 7196.31 2096.85 0.29137 62.2102 995244.9441 90.6501 2996.91 5 41.3613
0.86 14579.6 4228.85 0.29005 194.454 2024559.167 213.887 5618.58 143 26.5626
10.75 7223.7 2765.73 0.38286 54.5582 1011939.0199 109.147 3046.76 77 38.7307
12.991 6810.3 3062.12 0.44963 46.3042 966329.1414 116.98 3127.75 52 40.0175
10.511 6560.64 2524.54 0.3848 57.2752 941983.4971 106.325 2547.3 82 41.2518
3.064 15268.5 4050.4 0.26527 211.897 2123858.9079 240.312 5002.1 138 26.7225
3.224 8691.5 2123.72 0.24434 98.2145 1243138.8419 125.125 3736.44 47 33.3177
7.715 13344.9 5099.81 0.38215 125.578 1938703.4211 195.507 4789.02 126 29.349
2.255 9179.82 2788.56 0.30377 102.639 1260099.9027 146.511 3338.46 11 35.1212
12.631 9759.26 3853.78 0.39488 92.8745 1401830.8146 136.198 3994.89 31 32.2434
1.254 7389.52 2799.65 0.37886 63.3584 1078105.151 96.6498 3219.7 30 38.7872
3.988 12626 3839.95 0.30413 158.057 1740831.5705 195.685 5025.36 123 27.8119
2.025 21231.4 5844.49 0.27527 299.731 2862086.8638 307.428 6549.53 278 18.7442
2.321 21898.8 6214.54 0.28378 297.964 2967950.8199 334.389 6607.95 279 18.6607
2.626 8953.51 2155.02 0.24068 86.833 1266309.2362 111.779 4583.04 27 33.5859
1.37 7319.45 2253.52 0.30788 79.2785 1003410.411 114.514 3075.53 84 38.1792
5.258 8398.96 2773.72 0.33024 66.0337 1116159.8823 122.708 4388.8 63 32.9158
2.841 9851.21 2395.78 0.24319 146.865 1387675.4667 148.418 4097.54 134 32.4696
7.222 14165.6 4951.67 0.34955 160.406 1950302.1689 216.82 5072.73 141 27.5628
12.812 10190 3003.97 0.29479 88.656 1437966.9106 110.153 3617.13 57 33.4567
12.755 13952.1 5379.63 0.38557 79.1436 1907285.775 196.335 4414.44 136 31.2925
0.977 9907.86 1975.99 0.19943 103.558 1411409.7022 136.107 4273.48 50 33.5088
2.625 13548.7 4942.31 0.36478 116.583 1922777.2807 192.332 4938.6 70 30.3104
2.019 12759.8 4376.42 0.34298 148.493 1802121.0557 198.411 4956.07 170 28.656
3.739 11970.5 3319.46 0.2773 173.646 1662957.1311 195.721 4768.29 62 25.7553
2.167 6337.08 1751.89 0.27645 70.0983 854127.9873 81.1027 2957.94 30 39.1235
3.834 7896.69 1901.08 0.24074 82.2009 1117259.4704 103.08 3904.13 38 35.4726
1.571 15250.2 4799.36 0.3147 211.688 2116253.5305 253.378 5338.82 289 24.7219
13.937 7139.44 2472.34 0.34629 58.8216 993264.1185 105.834 2803.39 35 38.8096
15.451 8803.86 2679.04 0.3043 62.7605 1239769.8089 111.052 3194.16 11 36.3191
2.357 4395 981.07 0.22322 42.7806 598752.5011 68.6074 2638.53 13 42.9279
3.137 5466.43 1722.14 0.31503 55.9216 757965.358 72.9658 2558.54 34 41.5926
2.144 12226.2 2919.26 0.23877 152.058 1703790.0834 195.263 4070.5 67 32.4556
1.424 8469.74 2112.85 0.24945 72.0763 1235686.209 102.575 3192.44 22 37.1176
12.006 24391.4 9312.49 0.38179 240.366 3381233.4384 376.928 7049.37 122 17.3597
1.988 5623.76 1734.52 0.30842 54.926 791905.2229 79.2528 2596.79 41 41.2754
9.27 9479.97 2446.59 0.25807 89.9335 1317700.3264 119.474 3513.64 75 35.6547
16.495 7579.37 2839.61 0.37464 100.598 994544.2517 124.891 3489.64 87 37.5253
3.066 14223.4 5282.9 0.37142 130.533 1999754.0511 218.599 4321.62 43 29.5211
0.995 8858.07 3138.65 0.35432 87.3798 1178752.2269 135.112 3653.69 50 35.8511
2.466 16040.8 4019.35 0.25057 244.402 2276333.0264 263.942 5556.69 89 22.0936
1.264 9960.88 2307.17 0.23162 122.488 1382303.6336 160.952 4594.04 72 30.2183
20.695 10578.4 4964.4 0.46929 88.8967 1281935.0251 200.289 3314.68 86 37.262
12.542 6825.76 1775.05 0.26005 61.6252 976057.4397 86.1539 2880.76 63 38.7163
1.665 15083.9 3119.18 0.20678 179.378 2107448.6861 220.202 4689.64 29 28.4905
19.117 5927.61 1120.8 0.18908 54.1951 766376.4818 71.935 2882.4 45 39.5608
10.688 7130.64 1647.14 0.23099 55.1162 976531.2652 87.3302 2958.71 28 41.0752
15.784 8173.35 3491.65 0.42719 82.9809 1100034.8548 134.773 3911.81 44 36.7079
8.318 5709.8 998.75 0.17491 59.6757 778353.0448 70.6617 2912.17 54 40.4288
5.64 7414.88 2508.74 0.33833 65.7423 1043468.9182 87.3229 4114.1 50 37.5394
2.603 9745.61 2898.32 0.29739 103.066 1364210.2969 140.553 4948.98 43 32.5255
15.644 9148.61 3835.3 0.41922 84.5002 1266292.6414 134.007 5033.19 49 36.8822
19.786 16596.9 6247.76 0.37644 193.554 2345485.3125 268.226 4847.13 168 22.5052
1.705 6812.26 2141.14 0.3143 63.2395 919546.6315 95.2968 3153.45 22 40.1998
16.699 9324.54 3788.7 0.40631 90.9574 1320953.8919 120.409 3648.45 28 30.0202
1.373 5622.83 1319.15 0.2346 49.7828 810614.5821 71.9084 2848.89 58 40.2331
14.83 7132.37 1962.58 0.27516 68.2223 996822.938 84.9675 3014.25 54 39.2259
16.551 12325.3 4482.45 0.36367 72.5928 1749007.9339 161.928 4551.94 98 31.372
2.576 7883.06 2718.86 0.34489 71.273 1084866.9173 106.431 3239.09 17 34.143
10.345 6597.18 1679.5 0.25457 57.5928 950414.6362 86.7329 2386.75 26 40.825
7.498 12258 3338.97 0.27239 146.268 1653411.0027 184.991 4738.66 68 30.9826
16.68 11584.9 3680.21 0.31767 119.33 1616850.6417 152.529 4691.86 121 32.2376
1.3 6241.82 1670.34 0.2676 53.3826 886507.9908 82.1719 3232.09 52 40.3039
1.374 5869.35 1267.95 0.21602 57.5862 812956.1393 75.3248 2661.1 25 40.4981
11.61 7515.06 1441.18 0.19177 66.1897 1048421.3216 73.4449 2792.84 14 39.9669
3.107 7134.01 1971.51 0.27635 67.8355 981408.4851 86.2515 3085.39 51 40.3998
1.468 6740.46 2252.62 0.33419 62.3551 908507.0926 101.083 3103.78 20 40.2058
1.788 16909.4 5921.73 0.3502 225.616 2313888.544 283.323 5465.62 234 23.3
2.432 9901.88 4155.55 0.41967 132.232 1337685.714 202.145 4341.87 174 30.0985
11.671 8325.3 2296.53 0.27584 86.2916 1129037.0513 119.654 3734.33 56 35.3512
4.937 12077.9 3891.95 0.32223 127.642 1736778.5524 160.505 4535.2 150 31.3685
20.328 17612 8096.38 0.4597 121.478 2403902.0622 311.055 5942.07 99 26.2825
3.322 6969.47 2337.09 0.33533 63.0394 910465.9598 112.582 2744.42 25 38.6689
7.017 18107.2 5716.09 0.31568 233.756 2486642.1917 285.201 4954.41 137 26.3116
0.667 7555.57 1856.82 0.24575 85.5466 1054320.0312 121.29 3121.18 5 36.8441
13.383 6337.09 1478.86 0.23336 64.18 849463.0646 87.7138 3212.84 81 38.271
1.9 9533.3 2208.5 0.23166 111.873 1308719.4064 148.921 4011.92 39 34.0551
12.705 8880.03 4410.78 0.4967 75.8119 1201045.59 151.455 3420.81 74 36.5646
4.391 6653.5 2222.39 0.33401 76.9282 895051.9986 108.682 3263.42 94 39.01
12.126 5783.82 1651.99 0.28562 55.0248 808734.3427 84.1172 3025.04 41 39.536
15.644 8701.49 3577.72 0.41116 92.3097 1266357.0105 129.749 3720.47 37 35.2912
1.931 7879.32 2634.78 0.33439 79.1298 1079884.1307 109.161 3119.49 114 37.8651
11.344 8882.68 3539.37 0.39845 78.6841 1213467.8152 144.933 3887.46 55 34.73
6.111 10520.6 3022.24 0.28726 153.406 1446326.5572 185.45 4258.83 113 32.2314
1.253 6467.23 2157.34 0.33358 75.6562 883600.2366 92.7748 3217.54 58 38.497
10.173 11506.7 4773.41 0.41483 76.0631 1553024.7285 184.292 5191.5 13 32.9515
19.201 14563 5858.66 0.40229 80.5033 2058423.1491 199.51 5719.32 97 26.3933
1.94 7117.4 1964.89 0.27606 66.678 963333.2399 90.3599 2998.74 20 39.0106
2.508 7801.52 2213.15 0.28368 64.4697 1070654.1498 114.771 3999.93 28 37.1055
20.102 13607.6 4251.22 0.31241 165.476 1877443.7156 224 4990.19 152 27.2672
18.223 11633.6 4029.61 0.34637 145.797 1618444.5513 179.581 4159.96 134 28.6713
16.411 8082.19 2119.16 0.2622 75.1168 1078553.4666 100.548 3445.04 45 37.339
12.804 4452.86 1651.63 0.37091 42.4326 591688.1543 75.6553 1493.36 29 44.0094
13.084 7663.2 1794.97 0.23423 63.1118 1084711.0934 82.5938 3137.29 60 39.426
19.232 9342.23 2846.27 0.30466 132.115 1283312.8796 198.997 4040.07 80 32.7062
18.356 10130.8 4476.34 0.44185 87.7622 1269645.9309 184.168 2761.53 115 39.1067
1.576 10836.8 2766.99 0.25533 124.811 1502673.5946 163.175 4652.77 70 29.8464
1.666 6582.93 2244.32 0.34093 64.2605 883088.5817 90.8876 3048.27 26 40.0907
18.836 8934.61 1852.92 0.20738 112.719 1248845.1558 212.85 3612.36 136 35.8605
10.267 8909.5 3252.77 0.36509 62.4533 1265154.7933 123.727 4748.22 61 39.5598
2.148 16854.3 4809.55 0.28536 219.791 2331350.0593 275.838 5689.44 202 22.1761
15.268 13814.5 4324.97 0.31307 127.133 1957774.8034 167.235 5001.71 67 28.1614
2.083 6960.64 2289.61 0.32893 77.3899 947395.8392 100.173 3805.99 32 36.3731
3.298 4796.28 1383.77 0.2885 46.942 666665.2534 58.386 1879.52 16 43.7637
9.879 4930.54 1854.33 0.37609 54.7446 673561.066 99.2984 2829.93 65 41.3498
2.765 3453.44 1144.96 0.33154 24.4714 465054.9894 40.0613 1455.36 2 45.2186
1.648 12175.8 3304.69 0.27141 154.746 1731437.9445 176.046 4712.67 25 28.5281
19.813 8069.36 2138.48 0.26501 51.557 1106275.3428 101.537 3694.01 41 36.9973
1.046 21859.3 8009.56 0.36641 193.756 3044210.5372 374.635 17294.64 146 26.9305
4.45 6902.41 2138.07 0.30975 65.3005 938860.6781 104.013 3116.25 34 36.7901
9.63 6754.75 1537.16 0.22756 51.0229 956553.1057 71.7029 3362.18 22 38.9478
1.763 10346.7 1628.59 0.1574 131.476 1442958.166 158.473 4602.96 144 30.3283
19.168 9380.33 2715.39 0.28947 71.8843 1253948.5345 128.04 3334.63 45 38.8746
2.39 6282.4 1630.85 0.25959 54.852 876912.0007 76.1141 3357.92 55 38.762
0.893 11479.3 3053.2 0.26597 138.905 1599396.0015 175.958 4707.56 172 28.6243
11.428 4171.19 1278.3 0.30645 35.1181 574450.7405 51.9648 1384.12 32 44.4927
2.125 8306.83 2281.64 0.27467 76.8608 1118455.1316 113.803 3310.09 106 38.1662
11.506 6015.09 1583.37 0.26323 65.2159 854046.5269 90.1313 3083.85 14 38.824
0.644 8010.57 2056.05 0.25666 84.519 1102084.2683 112.631 3100.55 21 38.029
3.079 15510.2 3372.16 0.21741 197.941 2119445.4033 264.497 5175.96 144 24.5216
5.186 17868.9 4923.65 0.27554 234.747 2459150.7709 284.122 5417.2 204 23.6966
2.464 11519.2 3631.54 0.31525 124.06 1596245.6398 172.264 4189.58 39 31.1912
8.638 11127.7 3478.57 0.3126 128.533 1490123.7449 171.788 4296.17 50 32.3433
4.325 5888.13 1954.36 0.33191 57.275 831710.1232 72.4341 2657.08 25 40.8457
3.434 10637.8 3415.6 0.32108 139.209 1465718.1043 160.143 5102.41 42 28.2267
18.156 9552.44 3931.33 0.41155 86.9237 1303576.4263 129.596 3984.27 37 36.271
7.958 5997.09 2028.48 0.33824 55.4428 819082.7304 82.8936 3220.41 13 39.3423
1.736 12471.1 3588.61 0.28775 145.907 1782378.8457 172.102 4720.68 30 29.2638
13.967 6519.29 3164.13 0.48534 45.6833 891767.1564 106.996 2186.85 10 42.1825
16.176 8792.26 3651.98 0.41536 75.7287 1197620.2294 128.332 3481.04 95 35.9842
3.949 5878.82 1897.23 0.32272 46.5687 814615.5621 81.1184 3038.13 19 40.4154
2.189 6103.49 1740.12 0.2851 71.0612 868893.0569 79.0746 3075.11 16 38.4354
11.508 9227.25 3507.37 0.38011 95.0229 1293279.1283 113.68 3875.59 65 36.9907
14.28 4401.27 1708.12 0.38809 25.4148 607318.499 59.1508 2175.47 3 43.8272
5.481 12311.8 4164.42 0.33824 138.781 1706294.8175 173.272 4432.82 117 30.6825
3.313 22632.9 6825.79 0.30158 296.928 3149322.2068 369.619 6293.27 107 17.4159
19.211 12659.8 4219.9 0.33333 115.62 1746555.9424 175.633 6411.63 89 28.5913
15.897 9401.77 3691.54 0.39264 78.6343 1299563.3492 130.021 3555 23 36.9396
4.45 16151.8 5398.36 0.33422 191.389 2202573.9375 228.733 4595.49 85 30.2234
2.148 10739.3 2365.67 0.22028 124.675 1461481.8018 152.483 3648.7 14 34.7357
6.752 7641.85 3115.66 0.40771 64.0597 1088199.7 106.439 4104.29 68 36.1995
14.748 7155.65 2173.33 0.30372 61.1054 1003966.8482 110.269 3497.52 26 37.6479
15.008 12963.1 5084.11 0.39219 159.216 1840821.0527 242.649 4647.57 175 29.7292
2.333 5802.07 1527.46 0.26326 61.2506 730524.7715 88.5772 3097.87 16 39.4408
15.264 10625.2 3479.35 0.32746 108.956 1422974.9713 162.509 3966.72 24 33.1878
18.892 10536.4 2505.14 0.23776 109.94 1434550.7277 155.711 4364.55 113 32.0266
1.809 6214.99 1988.95 0.32002 60.6722 864752.0143 90.6314 2677.54 41 40.6397
3.323 9457.88 3317.48 0.35076 94.3341 1325438.3149 143.871 3744.18 85 36.6288
14.819 9131.23 2004.04 0.21947 76.7751 1207635.4473 116.987 3292.4 58 38.0878
3.953 5720.52 1577.63 0.27578 53.5871 799277.1156 63.9736 2498.03 40 41.877
12.646 7056.87 1942.65 0.27528 58.6671 1010671.3761 87.5896 2350.96 63 40.2581
15.098 6813.33 2331.16 0.34214 88.0971 825471.3305 115.438 2432.09 101 40.4999
18.719 7904.35 2629.8 0.3327 67.2275 1101677.5354 98.7927 3308.48 30 38.7479
9.916 8241.85 1495.07 0.18139 74.0527 1094393.9815 97.3059 4024.1 25 36.935
1.303 8403.38 1586.71 0.18881 76.6323 1201175.1466 99.4998 3933.97 17 34.9329
7.898 18758.9 4474.76 0.23854 201.551 2671290.862 271.858 5419.71 227 24.0694
1.592 8605.36 1730.56 0.2011 79.7462 1220602.3755 103.743 3824.8 17 36.2237
6.521 4398.75 1259.48 0.28632 39.9829 601371.3052 61.9825 1454.45 13 44.3112
2.94 11283.4 3061.2 0.2713 128.635 1547427.6056 151.105 3869.24 19 34.6807
17.64 13572.7 4367.12 0.32175 129.408 1938954.0654 173.408 5372.81 56 26.5197
3.627 5011.16 1205.04 0.24047 49.8648 646250.8611 57.0972 2082.19 18 42.7831
3.502 15610.9 4235.82 0.27133 210.589 2151802.7734 259.422 5132.09 166 24.6902
1.695 8675.95 2429.22 0.27999 89.8544 1220944.4563 116.449 4353.54 52 33.8626
1.775 10531.6 2018.6 0.19167 150.156 1447723.1065 170.297 4005.26 66 26.1309
2.776 8848.17 2847.17 0.32178 79.5108 1200686.4215 120.776 3290.97 110 35.9179
6.118 7572.09 2233.84 0.295 65.1523 1060575.9762 91.0521 3534.34 55 36.8032
17.47 10562.2 3363.78 0.31847 107.175 1518922.514 153.432 4274.21 148 31.0808
13.56 8690.44 2214.05 0.25476 83.5288 1233822.8106 105.797 4057.26 77 34.057
4.916 10754.1 2792.24 0.25964 108.712 1517134.1046 155.164 4347.03 64 32.8957
3.862 11545.4 3305.06 0.28626 52.2952 1606692.6353 177.572 5070.66 54 39.6827
16.688 9148.59 2944.32 0.32183 85.1275 1274748.7777 118.423 3797.44 38 36.1227
15.684 7449.56 2655.29 0.35643 78.9548 1020644.4417 119.103 3235.03 57 37.4305
17.655 11368.1 3755.75 0.33037 94.9973 1582754.0792 154.971 5621.65 134 31.3415
13.9 8352.99 2764.33 0.33093 72.5403 1174863.8724 103.727 3557.56 21 36.8709
3.016 8970.25 1890.32 0.21073 97.6902 1263550.1409 127.138 3806.48 41 34.7775
1.356 10501 2941.25 0.28009 124.492 1462887.0629 172.859 4183.11 56 33.0132
12.516 5822.55 2147.46 0.36881 37.8925 749834.1105 99.8984 2707.42 40 40.9395
0.688 12629.1 2572.39 0.20368 155.348 1721765.6964 199.966 5065.84 138 29.843
5.205 8484.37 2379.9 0.2805 73.3358 1183629.1034 105.316 3934.98 38 35.4208
15.116 9854.49 2759.6 0.28003 57.712 1378355.8821 129.868 3725.62 46 36.5329
17.579 15183.3 3797.7 0.25012 157.09 2119069.8399 179.862 5510.51 29 25.1175
11.371 6654.74 1625.23 0.24422 64.0063 962026.9625 68.1551 3423.4 46 39.7226
9.547 10241.4 3472.91 0.3391 95.5002 1447842.9925 148.631 4167.52 82 33.5207
1.228 8712.29 2260.09 0.25941 92.4281 1239459.8101 130.649 3961.43 165 34.9016
12.809 5386.73 1650.89 0.30647 38.9279 726084.0096 73.0234 2878.83 17 43.2953
12.044 16011.5 4018.21 0.25095 171.947 2214891.6085 232.877 4887.18 29 26.7645
1.572 12090.3 3076.95 0.25449 155.053 1721142.0461 158.252 4732.77 25 28.9032
12.26 14199.4 3160.12 0.22255 191.917 2068870.0019 217.355 4203.96 101 31.7428
2.618 10108.7 2501.21 0.24743 89.7764 1431491.9855 141.522 3607.85 131 35.9463
11.442 7218.64 2533.98 0.35103 59.3507 1028067.746 106.992 3561.31 28 38.2915
14.037 12951.1 3131.27 0.24177 86.5548 1777538.06 164.617 4336.54 117 33.2555
0.512 9884.53 2450.04 0.24786 103.075 1398437.5881 158.824 3847.8 15 34.0433
0.998 8276.95 2410.2 0.29119 88.3737 1141691.654 114.071 3116.49 21 37.0453
18.549 9378.53 4019.09 0.42854 64.9438 1300972.9373 131.074 3572.73 68 35.4955
18.546 8599.05 3926.86 0.45666 109.846 1187768.9515 162.285 4110.47 116 34.8506
14.805 7876.71 3323.11 0.42189 78.2853 1063271.807 128.117 3191.36 26 39.5359
1.588 5154.51 1106.43 0.21465 53.3769 677089.7462 81.8797 3245.39 25 39.6541
1.766 9237.97 2710.96 0.29345 97.6464 1289570.3724 128.003 4253.44 34 34.2232
16.115 7620.57 3482.38 0.45697 93.6101 1003962.058 150.522 3050.26 123 38.6621
16.514 9927.06 2272.25 0.22889 97.3518 1361142.3955 127.891 3712.55 20 36.4814
12.321 7116.77 2443 0.34327 70.1582 982229.275 119.546 3074.41 32 37.596
4.919 15946.8 5085.69 0.31891 119.451 2243945.8482 222.422 8417.41 94 32.5554
1.776 7158.6 1872 0.2615 60.492 997187.0887 86.6338 3054.07 97 38.3573
13.707 11714.4 4576.44 0.39066 115.607 1593348.5135 179.653 4502.8 97 32.7578
6.074 13039.3 4732.83 0.36296 159.797 1811062.0603 214.343 4624.5 100 29.6923
1.249 12926.1 2710.32 0.20967 156.64 1746432.6311 204.961 4841.44 146 28.6195
13.757 5772.35 1669.49 0.28922 51.1725 806155.0694 92.1503 2567.82 91 40.9542
8.509 6645.8 1978.88 0.29776 60.3171 930506.539 93.4916 3216.53 108 38.209
17.767 10085.9 3305.95 0.32777 93.0512 1437116.6174 130.441 4318.89 107 30.6324
19.257 8916.64 3625.96 0.40665 89.5312 1258402.6286 157.051 4144.47 133 33.6803
17.991 11928.3 4001.41 0.33545 96.0196 1659673.7164 151.442 4996.83 53 30.4805
4.284 14933.8 3891.22 0.26056 207.351 2059778.8475 251.735 5098.89 144 25.6273
1.773 11386.5 2956.41 0.25964 128.088 1584559.7895 159.286 4444.61 96 31.3723
12.474 9737.62 3011.51 0.30926 95.1059 1350547.7271 135.596 3966.14 97 34.2861
1.668 5208.82 1160.54 0.2228 49.8345 745147.7952 67.5148 2849.41 58 40.2214
19.636 10897.2 3469.16 0.31835 102.877 1508315.2124 147.197 4274.11 77 32.3572
14.35 7881.74 2915.01 0.36984 86.8572 1101058.9441 125.64 4008.5 62 36.1351
1.351 6728.9 2347.9 0.34892 77.0622 922117.3488 93.0413 3224.03 62 38.5233
15.201 7976.41 2376.28 0.29791 80.7336 1171905.7386 89.8918 2912.35 52 38.9498
1.141 8422.01 1508.68 0.17913 80.3274 1201786.8177 98.2665 3856.2 17 35.517
1.485 8495.41 1836.59 0.21618 101.752 1178154.5057 128.439 3638.22 25 34.099
14.736 7598.47 3197.82 0.42085 52.1382 1064235.7467 113.299 2922.47 61 39.0691
20.901 15037.5 4317.54 0.28711 172.794 2160575.9721 225.777 5683.73 89 26.6188
3.499 6867.49 1981.46 0.28852 69.599 933099.2509 103.206 3225.63 74 35.4113
8.874 7309.44 2100.32 0.28734 91.8097 990892.6964 97.8269 3460.54 33 37.2736
18.37 13743.2 4709.44 0.34267 130.635 1909694.1315 175.696 5236.99 64 27.8898
9.279 11141.5 2355.49 0.21141 92.2739 1536834.3422 121.44 4153.19 141 35.3111
2.795 5262.96 2047.2 0.38898 33.9256 747820.5578 68.6193 2540.88 38 42.6978
14.791 8218.76 2374.85 0.28895 60.5888 1161165.3352 95.7878 3124 43 38.3738
16.753 7013.37 1865.51 0.26599 64.2734 1001278.9567 95.1054 3206.19 26 38.9659
1.238 9920.13 2293.39 0.23118 125.24 1375929.2984 159.875 4597.41 74 30.2222
14.95 8523.72 2259.04 0.26502 70.9632 1161600.6367 114.678 3724.81 44 35.6615
11.255 8521.61 2938.46 0.34482 62.8997 1222061.5619 116.551 4257.78 42 36.1282
2.048 11409.2 2924.91 0.25636 140.838 1565900.1383 160.708 4486.63 88 31.2702
20.61 11363.6 4318.14 0.37999 80.0882 1539108.0968 177.794 6010.84 75 30.7428
18.804 9863.75 3614.9 0.36648 101.852 1326154.5418 141.787 4584.66 92 32.5126
11.268 4628.14 1599.5 0.3456 32.8091 623664.576 65.2844 1422.47 29 44.339
4.859 6535.59 1735.05 0.26547 50.9376 889841.3634 80.9132 2572.17 30 41.0387
16.309 6824.09 2284.98 0.33484 62.9975 939626.9501 92.7566 3027.61 47 38.6879
2.536 8722.93 1566.72 0.1796 97.0832 1212390.0506 121.227 3880.93 47 33.7378
2.276 4962.54 930.87 0.18757 44.7279 677233.5667 66.8516 2836.82 13 39.485
0 7982.79 1740.49 0.21803 60.6466 1103243.0223 89.3428 3623.34 41 41.043
13.898 6545.72 1854.37 0.28329 67.1352 918250.0486 77.7407 3710.56 77 39.9665
17.981 12064.1 4629.7 0.38375 128.916 1746160.3741 185.703 5329.55 154 29.6958
14.374 8117.96 2657.6 0.32737 42.3703 1142936.2169 104.707 4091.38 71 35.013
0.6 9246.97 2579.79 0.27898 97.4966 1266036.3852 159.622 4128.75 73 33.1645
15.485 9918.51 3395.19 0.3423 119.319 1343914.4405 154.85 4163.47 107 34.4343
14.724 7643.76 3266.08 0.42728 57.6353 1084456.087 111.762 3163.17 62 39.399
16.42 8447.09 2770.29 0.32795 100.639 1081275.0514 154.783 3556.56 81 37.0411
16.419 7843.19 1688.4 0.21526 53.6703 1101412.5402 74.4509 3253.88 21 36.1752
10.081 9318.02 2934.99 0.31498 60.9561 1303372.2602 119.325 2957.71 15 33.9397
14.575 7870.79 2942.59 0.37386 74.3443 1119946.8931 113.717 4119.09 58 33.7704
2.043 12206.6 3264.99 0.26747 152.865 1732555.0429 166.381 4685.68 24 28.7823
19.323 11201 4441.79 0.39655 91.827 1533058.7726 147.466 4641.98 41 37.3931
5.372 3327.24 1078.31 0.32408 25.316 457196.8891 39.857 1276.91 10 45.732
1.535 15323.8 4162.18 0.27161 180.227 2174742.6352 221.37 5676.92 73 26.3896
2.931 4873.08 1375.32 0.28222 46.2439 680825.0487 56.7995 1813.88 22 43.7357
2.726 8739.48 1950.59 0.22319 111.308 1239407.2745 140.313 4204.11 41 33.1715
17.641 6506.77 1630.58 0.25059 56.6535 861636.756 89.9064 2959.88 34 37.9355
4.537 9654.6 2230.74 0.23105 88.2039 1363773.092 110.283 4664.43 35 32.828
4.467 8940.61 2451.21 0.27416 95.6395 1243529.1941 144.144 4286.24 73 33.3025
4.779 5562.1 2293.89 0.41241 54.9515 749714.9478 88.7054 2670.08 50 40.8985
0.455 9333.45 2210.46 0.23683 101.448 1325883.0977 150.038 3802.1 14 34.3152
18.175 12433 3237.43 0.26039 138.199 1751157.1497 157.474 4893.01 145 28.6319
9.16 5236.12 1603.15 0.30617 41.2904 728125.8094 63.2774 2699.23 37 40.175
5.644 7811.87 1876.97 0.24027 64.2876 1102587.4695 100.858 2989.88 29 38.6095
1.299 14913.3 4998.09 0.33514 182.938 2083218.2972 261.194 5402.29 153 24.921
13.32 7756.56 3535.66 0.45582 69.2586 1093808.934 127.137 3065.74 33 37.4837
3.78 11326.9 2997.62 0.26464 136.449 1569788.2343 162.795 4244.16 39 46.5464
1.762 13056.7 2714.13 0.20787 170.194 1759440.2174 218.602 4809.38 101 28.174
2.91 7944.05 2995.92 0.37712 79.7826 1134257.4909 126.233 3351.63 32 30.3081
11.945 15579.1 4980.34 0.31968 155.168 2193189.0474 231.232 5697.59 158 24.585
4.165 12813.6 3809.06 0.29726 161.969 1801280.629 205.382 4676.07 70 29.4903
11.002 3819.05 1226.38 0.32112 34.457 517250.6747 50.4938 1385.21 29 44.0003
14.856 7951.87 3060.23 0.38484 71.5842 1120413.0896 128.574 3590.2 50 39.2839
19.445 14967.3 6695 0.4473 164.923 2072563.2702 287.123 5080.23 120 22.7924
15.764 6809.81 2471.78 0.36297 60.5855 892212.1453 108.067 3041.67 62 39.1746
19.242 8507.9 2737.23 0.32172 74.2901 1200553.2654 115.884 3063.34 81 38.5169
3.125 8161.27 3016.12 0.36956 85.1075 1160662.2825 136.157 3508.2 48 35.4849
16.769 9227.75 3327.33 0.36057 82.5619 1318616.0331 140.177 3344.03 65 36.9341
6.545 13012 3737.88 0.28726 168.979 1779822.1401 221.166 4808.97 125 27.7702
1.583 8869.29 2580.98 0.291 77.1974 1234812.5054 110.45 4343.06 64 37.7946
4.462 14100.5 4254.96 0.30175 148.138 1958167.1533 248.263 4614.99 84 29.6154
19.6 9531.51 2825.95 0.29648 72.0438 1332868.569 119.773 3627.1 61 35.4277
7.609 4247.72 1819.13 0.42826 25.1294 587387.8459 60.7958 1636.42 32 44.2953
0.582 7842.01 2015.38 0.25699 83.2047 1080286.5415 112.271 3100.79 21 37.6774
0.922 9657.63 1858.58 0.19244 101.973 1371701.06 132.318 4260.22 37 33.5849
11.667 8264.68 2589.2 0.31328 91.6822 1173273.7584 101.267 3609.96 25 35.2329
3.071 9037.79 2670.53 0.29548 85.8363 1272027.9725 128.211 3298.7 12 35.0342
2.486 15531.8 4796 0.30878 186.246 2063086.7127 218.596 4274.92 103 30.7738
2.36 4146.91 1014.56 0.24465 35.1082 570640.7661 54.8496 1779.37 23 43.9569
5.177 6416.8 1407.47 0.21934 55.6879 899770.4946 72.3555 3000.84 24 38.4069
11.592 7524.06 1944.16 0.25839 58.6243 1077285.2745 91.3494 2982.27 53 38.9028
1.773 15955 4932.65 0.30916 215.713 2224796.9867 248.013 5406.29 292 24.5674
4.045 8137.52 2079.28 0.25551 99.2022 1142451.4167 100.169 3953 98 33.0843
1.895 5101.67 1442.43 0.28273 46.9988 705452.6738 59.8838 1956.83 18 43.7995
18.514 7164.04 1200.93 0.16763 61.8709 1016956.8547 81.644 2914.87 45 46.5464
15.092 6484.82 1908.32 0.29427 58.8805 885777.1915 87.278 2662.18 30 39.553
15.221 7194.79 2094.11 0.29105 68.0037 1017080.8652 81.4014 3557.24 84 39.1759
4.621 20272.5 6231.19 0.30737 233.685 2777591.7245 291.94 5729.93 180 22.0303
2.236 11972.3 3391.23 0.28325 136.295 1654436.2799 162.481 4488.96 99 31.1703
3.961 12745.5 4064.1 0.31886 152.107 1786000.7239 161.574 5222.98 36 28.0108
7.485 4468.16 1085.92 0.24303 40.6122 600371.7354 57.2419 2497.45 17 43.4022
0.857 9417.74 2405.39 0.25541 103.025 1329610.4271 155.013 3807.11 11 34.2771
15.496 7531.53 2700.15 0.35851 79.2878 1023601.7825 117.266 3492.73 96 37.5867
13.865 10037.4 3426.55 0.34137 81.9266 1445414.3454 131.296 3285.95 28 34.6283
10.273 7811.16 2587.35 0.33123 60.6459 1077525.5449 104.611 3323.59 7 38.9728
1.55 9528.23 2048.08 0.21494 101.376 1323914.1181 136.092 3707.15 27 33.7825
7.562 7692.24 3103.68 0.40348 68.319 1069482.8389 99.5384 3436.1 69 37.4048
12.488 6050.69 2634.08 0.43533 59.1098 822368.712 93.2254 2804.55 43 40.7001
4.093 22665.4 6433.43 0.28384 310.588 3127046.8487 351.271 6331.23 104 17.9303
14.87 9534.62 2896.65 0.3038 96.3029 1345825.6837 126.195 3715.85 96 35.386
13.472 5691.08 1440.49 0.25311 36.1202 781487.2404 69.4841 2181.35 22 43.6767
11.387 6917.86 2601.19 0.37601 65.5444 998375.9268 93.5986 2288.21 89 40.4262
10.205 5367.17 1855.14 0.34564 52.3449 741398.5151 81.0182 2601.37 46 41.3924
13.139 7588.36 1923.64 0.25349 79.0066 1008533.7908 97.2743 3347.6 48 37.5653
2.376 11061.5 3010.63 0.27217 131.414 1518591.3661 157.812 3728.27 22 34.3977
3.177 22008.8 6199.53 0.28168 296.374 3053193.6628 365.526 6017.44 104 18.3321
4.924 7945.77 2065.57 0.25995 72.8337 1111349.6273 102.056 4083.45 15 34.2754
3.477 12022.1 3814.91 0.31732 96.3749 1643444.1535 179.285 4622.42 149 30.9102
11.091 6727.89 1670.51 0.24829 59.3246 916610.2948 89.8088 3094.48 27 34.6139
1.683 14570.7 4709.74 0.32323 156.919 2093505.3608 227.151 5711.06 76 24.9062
9.943 5733.31 2137.78 0.37287 56.0254 773624.5018 89.6894 2954.23 12 40.5415
12.919 6513.68 1431.06 0.2197 59.524 895600.2482 74.2538 3279.89 47 39.1545
6.113 9676.53 2889.11 0.29856 92.1281 1377450.0402 129.27 4096.4 100 33.8766
2.974 3471.31 1123.9 0.32376 23.8694 467638.5724 40.0887 1348.76 1 45.6268
16.598 6488.46 3686.94 0.56823 92.7664 818033.7776 142.706 2116.87 78 41.6643
1.923 11673.8 3300.86 0.28275 147.441 1647009.0621 171.894 4665.92 176 29.8116
5.991 7379.15 2388.1 0.32362 56.4118 1003781.7345 115.179 3371.66 24 38.6982
12.009 7816.99 2797.33 0.35785 69.5424 1114521.2049 113.109 2960.36 24 38.8622
1.389 10493.6 2585.34 0.24637 126.245 1460323.1137 162.384 4620.75 62 30.1075
2.248 14700.5 4316.59 0.29363 208.738 2034181.8326 260.971 5132.84 143 25.193
17.34 7689.63 1726.24 0.22448 74.2804 1071745.3831 90.8331 3411.15 40 36.6089
5.718 7265.38 2835.92 0.39033 66.0191 1034631.1087 107.311 3434.94 46 37.4089
8.69 8070.05 2873.31 0.35604 99.2784 1135916.582 111.079 3707.21 28 36.9301
1.287 7710.56 2127.65 0.27593 63.2082 1063171.2296 114.164 3738.7 24 37.5151
11.976 6460.06 2254.23 0.34894 54.7169 873203.768 94.1603 2878.04 30 39.6113
8.675 18661.7 6152.55 0.32968 184.484 2638191.0497 298.681 5613.85 197 22.1298
12.947 8263.62 3080.3 0.37275 73.0483 1110208.1516 125.816 4252.35 58 36.6477
0.774 10886.6 2798.68 0.25707 130.993 1515853.7478 169.364 4663.03 173 28.944
1.991 8803.9 2846.23 0.32329 70.246 1194281.4642 136.88 3976.83 96 32.7189
10.181 5562.24 1457.15 0.26197 52.9642 769658.8758 76.4358 2790.42 45 42.0169
11.039 15774.7 5470.02 0.34675 194.677 2111311.6437 243.086 5313.9 171 25.181
3.877 23498.1 6796.71 0.28924 306.123 3269934.8444 377.509 6379.67 105 17.4159
1.898 9019.6 2218.87 0.246 83.7105 1292823.3464 124.161 3900.78 9 34.4611
14.021 7467.26 3068.39 0.41091 67.1728 1083226.7017 113.557 2807.79 49 39.436
18.029 10822.7 3673.35 0.33941 106.835 1516663.4754 163.541 4284.25 85 28.7442
2.131 10570.5 2715.64 0.2569 126.713 1443496.797 159.379 3602.15 18 34.942
7.768 17972.8 5409.31 0.30097 202.537 2485530.2144 277.014 6114.75 257 20.3682
2.747 9301.13 1958.15 0.21052 104.744 1327040.1013 118.069 3819.71 41 34.8665
5.391 16982.9 5773.69 0.33997 204.113 2390837.6662 257.185 4953.18 124 26.8372
1.178 8617.87 3177.81 0.36874 88.9582 1143349.7559 132.663 3743.07 44 35.9476
10.488 5712.29 1469.41 0.25723 32.4791 764516.5652 80.5841 2997.57 68 40.3633
1.527 5735.71 1959.72 0.34166 62.8267 797432.1027 86.8689 3324.21 66 37.7451
7.97 14477.8 5521.98 0.38141 186.667 1917486.7539 274.202 5176.6 121 27.3687
2.2 16485.3 5795.21 0.35153 177.902 2288170.8952 269.569 5857.03 221 26.9269
14.894 9063.51 2709.63 0.29896 51.8557 1242498.0324 119.229 4037.91 27 35.7058
0.864 12046 2624.27 0.21785 145.256 1709359.9057 181.045 4642.48 50 29.6825
15.226 7138.08 1844.52 0.2584 69.0715 1009129.1286 105.406 2908.67 48 38.5991
2.298 9967.45 3101.89 0.3112 129.513 1325362.8929 167.146 4000.58 34 33.495
3.779 9682.23 2732.67 0.28223 100.11 1349603.1617 122.536 3511.93 27 36.6575
1.801 8135.26 2361.04 0.29022 92.4233 1108056.082 119.917 3224.01 82 38.7058
11.286 8117.7 2822.71 0.34772 60.1931 1075534.7992 137.337 2890.65 58 39.0525
11.741 4964 1518.27 0.30585 51.4989 697669.9186 86.1409 2937.01 33 40.7196
1.209 6473.58 1593.43 0.24614 70.2872 854957.7101 88.8042 3436.3 78 37.5518
3.117 13960.3 3208.67 0.22984 166.03 1916666.2913 221.775 4740.22 35 28.6816
5.121 6514.25 2072.21 0.3181 61.7812 885865.6473 90.2738 2462.09 23 40.7767
2.089 7026.29 1811.12 0.25776 77.1883 936308.2834 95.1253 3538.38 79 37.6273
1.929 6753.15 1618.98 0.23973 73.2914 896262.7109 97.5078 3493.09 79 36.7753
16.505 10041.1 3018.48 0.30061 101.125 1383921.6697 119.306 3838.72 44 35.0199
2.071 14405.9 4339.03 0.30119 189.422 2011910.8444 225.495 5482 136 23.4814
20.245 11384.1 4363.92 0.38333 109.309 1547469.4718 174.009 4589.64 99 32.7209
4.246 12954.8 4462.7 0.34448 157.529 1805893.669 181.398 5198.34 37 27.7993
8.332 7342.03 2463.27 0.3355 65.3637 1035192.3183 104.152 3536.89 44 36.467
18.479 15492.5 5033.95 0.32492 98.6666 2151059.8959 210.041 4800.89 119 29.5921
9.595 6304.41 2248.83 0.3567 64.8429 833956.0169 94.7126 3647.09 47 38.3735
2.379 14263.7 4063.33 0.28487 196.651 1954556.9642 214.227 4590.44 170 28.8237
3.324 11363 3025.23 0.26623 118.543 1589303.2687 171.185 4952.37 70 29.6257
3.885 14585.2 4184.7 0.28691 180.246 2023856.8894 240.174 4483.46 18 30.0203
4.084 6705.33 1950.75 0.29092 61.6083 898892.9253 94.9889 3666.62 63 38.3
6.608 2803.02 788.51 0.2813 23.0985 404619.1514 41.9682 1570.69 43 47.102
18.798 18235.6 6196.31 0.33979 196.189 2592534.2788 279.445 5393.96 114 21.1195
3.206 7948.59 2283.93 0.28733 82.4066 1103552.7343 99.3212 3476.09 62 37.4074
2.415 9412.14 3747.73 0.39818 84.3997 1306971.8934 141.331 3781.41 110 34.4353
3.054 9300.01 2241.69 0.24104 101.828 1282664.8792 126.015 4292.86 52 33.6606
2.379 14263.7 4063.33 0.28487 196.651 1954556.9642 214.227 4590.44 170 28.8237
7.462 5487.32 1773.09 0.32312 39.8829 758495.2431 76.2584 2711.1 41 40.7043
9.464 8693.67 3611.62 0.41543 52.889 1218336.4159 144.666 5118.22 65 37.2827
14.352 7009.67 1662.17 0.23712 62.0243 961412.2294 90.9023 3307 48 38.1419
0.658 8884.7 2567.81 0.28901 101.542 1199523.5695 164.046 4087.43 77 33.211
17.18 8240.39 2634.82 0.31974 69.6539 1098693.3245 124.018 3686.18 46 36.3656
19.754 8747.27 2631.76 0.30086 103.194 1191846.9581 88.8989 3775.89 9 35.6471
0.449 8212.9 1942.37 0.2365 92.0159 1154036.785 122.709 3209.46 4 36.9507
3.093 14089.5 4626.06 0.32833 177.7 2078119.9547 257.96 4937.37 83 27.7171
8.629 16350.8 5038.49 0.30814 178.519 2309716.5711 245.589 4798.29 60 23.8351
4.189 13033.8 4475.5 0.34337 153.243 1837091.5607 170.655 5213.99 29 27.8391
19.368 9633.45 2475.77 0.25699 119.747 1323532.1192 135.758 4124.03 128 23.8957
17.121 11982.9 5279.99 0.44062 159.387 1611718.8957 226.086 4658.12 182 29.9006
2.158 15412.3 4907.74 0.31843 233.176 2109687.2534 262.289 5383.41 131 24.1076
1.994 11759 2836.23 0.24119 152.595 1653824.9999 221.293 4109.78 86 31.9153
2.527 9797.55 2419.16 0.24691 142.103 1382716.9486 156.051 4153.45 116 32.2402
8.253 4185.89 998.13 0.23845 40.9939 607186.0778 54.5811 2341.52 39 41.9094
13.631 7634.57 3127.91 0.4097 92.015 1028152.2595 154.299 3323.83 70 37.8913
16.99 12328.5 4076.3 0.33064 102.969 1724831.6681 143.382 5816.09 46 37.3298
15.146 9052.71 3279.1 0.36222 91.6887 1239793.395 117.105 3732.76 40 36.0196
0.712 12043.6 2498.36 0.20744 134.992 1645117.9545 200.198 4896.43 140 30.1221
2.989 12770.5 4461.89 0.34939 137.876 1801557.9723 186.908 4295.3 52 29.1437
8.046 4465.18 1584.48 0.35485 43.2269 593204.7437 72.4785 2563.1 24 43.5357
1.352 6483.6 2177.07 0.33578 60.973 865822.0988 94.8248 3113.92 20 40.6556
1.644 9724.45 2551.53 0.26238 102.502 1334498.1043 134.706 3509.15 123 34.8395
2.203 5208.86 1525 0.29277 47.3439 719820.534 65.8258 1989.77 25 43.738
6.152 16120.2 5207.25 0.32302 192.411 2224697.0858 278.713 5408.36 84 25.2345
11.435 5796.45 1449.38 0.25004 52.3474 790195.7332 84.8395 2915.52 72 40.5465
7.185 4948.29 1401.62 0.28325 41.6758 658748.3454 77.3806 2783.78 31 42.7636
3.36 9256.92 3466.33 0.37445 122.296 1286351.2763 166.485 3632.62 36 33.5014
14.177 6212.41 2428.05 0.39083 65.9755 839718.3437 98.9991 3432.89 49 37.3802
2.288 9833.12 2812 0.28597 104.965 1350827.2114 152.126 4122.2 49 34.6693
3.079 15263.8 4105.83 0.26899 170.9 2147464.468 233.232 4596.16 40 29.1942
18.55 7076.03 797.07 0.11264 67.5727 938431.1108 90.4936 3198.14 12 34.0427
1.228 6513.44 1983.34 0.30449 61.3372 875441.5415 95.1397 3075.98 19 40.3719
10.32 6449.66 1382.74 0.21438 54.261 877943.6259 74.5663 2841.41 45 40.6509
6.482 5078.89 1329.43 0.26175 46.5113 710572.9474 62.9008 2039.34 5 38.9815
4.406 12561.2 3266.21 0.26002 159.956 1728425.5273 217.796 4510.93 83 30.3739
4.989 8161.6 2748.51 0.33676 65.9599 1088148.7051 118.232 4345.54 61 33.5159
8.372 14502.9 6323.07 0.43598 90.9898 1934594.0547 241.8 8760.08 38 33.9956
12.213 11561 3846.46 0.3327 92.9675 1647090.5774 141.976 5280.12 102 31.0622
13.282 6238.09 2692.38 0.4316 46.4471 852591.5213 95.1256 3003.59 35 42.8472
16.318 7172.62 3065.41 0.42737 64.8809 1011241.7786 116.61 3454.56 62 37.3593
13.413 8433.96 2636.87 0.31264 67.7383 1158501.4721 114.181 3582.45 48 37.0967
1.494 3600.19 1127.46 0.31316 31.5638 492008.4359 45.3864 1356.04 22 44.6402
2.347 6604.55 2010.1 0.30435 72.4827 889483.7482 96.3531 3624.79 60 37.6722
3.655 11836.5 3500.74 0.29575 107.068 1629727.9153 167.526 4643.96 19 31.6217
3.298 23546.6 7273.15 0.30888 303.41 3280731.6446 379.999 6278.14 129 17.9378
14.406 7016.89 1904.12 0.27136 70.99 982998.5704 101.538 3277.41 81 38.6221
1.513 6850.75 2212.25 0.32292 57.6816 947735.1015 96.5626 3843.65 73 36.1663
17.31 13219.7 4705.66 0.35595 123.752 1798777.9317 185.947 5135.61 93 34.1716
5.281 24126.9 8203.88 0.34003 237.49 3336296.1523 311.208 6027.57 100 20.8663
5.599 6165.09 2035.77 0.3302 61.9677 845118.3699 87.8393 3323.72 35 38.3941
12.927 5624.46 1255.34 0.22319 67.515 754950.3526 82.311 3257.6 46 39.2961
2.341 6826.76 1583.52 0.23195 64.3668 957651.3322 85.6952 3542.07 36 38.1626
0.592 9201.33 2466.14 0.26801 95.1167 1259130.5024 158.065 4150.78 74 33.2452
17.917 10265.6 3173.86 0.30917 104.43 1482875.8531 149.856 4222.92 157 30.7121
4.234 16358.3 4331.95 0.26481 253.41 2251560.6697 279.511 4782.75 228 27.6521
4.294 7195.01 1777.38 0.24702 69.2119 969728.8517 93.5637 4015.12 60 35.8083
12.697 9267.76 4579.17 0.49409 83.3863 1139424.0752 179.748 2331.08 61 40.3469
18.09 7483.69 2265.32 0.3027 98.6084 997779.7411 114.909 3581.24 99 37.2676
17.63 8942.65 3766.83 0.42122 109.655 1179283.0047 118.975 4818.45 117 34.7372
10.307 5487.58 1567.47 0.28563 40.6181 761219.8992 73.3187 2786.99 55 41.2706
3.146 16918 5527.26 0.3267 205.308 2222468.8779 269.818 6989.23 242 24.2332
15.49 8984.5 2533.77 0.28201 55.3417 1255133.1465 120.552 4802.97 35 32.3791
2.449 12406.2 3464.89 0.27928 157.46 1725363.3427 205.3 4825.84 55 28.4615
1.763 20638.7 5511.74 0.26705 297.296 2791795.366 311.723 6545.32 289 18.6689
2.167 16930.4 5397.26 0.31879 200.259 2281299.5135 273.411 5386.72 206 24.4894
1.749 14070 4506.05 0.32025 164.961 1946698.8055 221.743 5277.61 197 29.4103
2.412 8276.51 2179.64 0.26335 80.0114 1174270.8244 103.831 3920.4 39 35.0447
3.479 23288.5 6867.41 0.29488 307.649 3223206.3134 359.175 6324.93 98 17.7804
2.21 7536.96 2094.31 0.27787 63.9107 949679.528 107.739 3450.96 25 37.9974
3.32 14704.8 3903.29 0.26544 183.106 2075003.6541 231.289 4585.17 14 29.371
9.522 7359.86 3045.19 0.41375 79.6974 974880.4481 130.042 3879.09 57 34.9876
9.747 7157.29 1392.8 0.19459 57.9613 998575.0873 78.6117 2731.4 10 37.4284
2.174 8714.49 2231.02 0.25601 83.2103 1177823.7476 116.675 3757.95 33 35.4052
4.084 7616.28 2199.66 0.28881 73.5571 1038080.0728 101.519 3377.14 74 37.1079
14.398 9782.79 3873.35 0.39593 84.6046 1350332.8115 152.423 4203.67 86 33.8144
7.606 6422.52 1793.48 0.27924 56.3155 882997.9576 86.6184 3133.15 32 39.5275
17.269 10177.1 3362.76 0.33042 82.6249 1394399.2555 122.271 4438.98 18 32.9282
10.357 5533.49 1663.23 0.30057 35.7836 758818.1939 75.1892 2350.03 22 44.0607
9.581 10442.4 3814.93 0.36533 100.01 1461935.1081 124.458 3471.89 50 33.3144
2.977 9101.24 1954.79 0.21478 103.451 1279673.6089 125.942 3835.61 53 35.2817
19.151 15232.4 6203.46 0.40725 136.036 2170206.8676 216.117 5719.32 162 26.3933
4.075 11404.8 3810.91 0.33414 147.676 1586856.7008 160.246 5122.41 40 27.9387
0.96 9020.78 2556.53 0.2834 101.689 1253417.1394 144.351 3309.79 4 36.641
8.52 5883.51 1393.55 0.23685 67.3027 815252.2971 78.8968 2761.41 82 39.7258
2.045 14010.2 5077.62 0.36242 200.382 1922109.6672 255.275 4663.13 50 33.4436
17.729 9154.79 2846.73 0.31095 90.0383 1219648.8502 145.452 3884.41 88 36.1175
10.271 8098.75 2756.61 0.34037 72.7552 1127400.3179 106.264 3581.45 35 36.7691
2.06 10723.1 3479.37 0.32447 112.049 1532422.4005 137.197 3956.21 54 34.3727
19.571 11852.7 4318.68 0.36436 131.232 1701606.014 175.962 4606.48 154 30.769
2.309 8525.2 2545.21 0.29855 95.7719 1201045.4219 121.462 3576.88 90 36.8005
13.895 7930.57 3114.79 0.39275 89.6422 1050832.3097 121.254 3496.48 33 37.6169
2.291 6637.8 2510.91 0.37827 80.8532 908664.6345 94.9262 3166.87 65 38.4511
1.698 8245.3 1639 0.19877 102.963 1143702.1885 107.21 3247.7 125 36.7809
2.508 12431.5 3079.32 0.2477 130.875 1691281.7944 154.443 3985.76 227 32.3573
16.41 6879.05 1676.56 0.24371 62.6305 955941.7968 86.1322 2888.2 31 39.7617
16.117 5446.18 1663.01 0.30535 53.8524 753846.7847 80.6302 2645.51 73 40.8231
16.515 8145.15 2668.39 0.3276 63.7441 1137029.9835 106.527 3675.51 12 37.1337
5.775 17092.3 5376.28 0.31454 189.729 2347604.7658 232.187 5500.4 86 24.0064
4.202 7433.81 2482.49 0.33394 72.0146 1006608.4243 112.727 3382.95 77 37.1526
16.784 10435.1 3992.33 0.38258 99.784 1484253.5782 151.029 3822.12 46 35.045
3.654 12743 4204 0.3299 156.09 1788841.1445 171.614 5066.65 40 27.7389
0.563 12691.8 2513.85 0.19806 150.169 1727090.223 198.777 4883.23 138 29.8273
6.263 7973.45 2909.44 0.36489 86.2231 1135365.0398 122.395 3077.29 14 35.3884
4.686 11792.9 3981.59 0.33762 138.665 1621121.5009 182.464 4334.81 39 30.2436
4.497 6361.98 2180.17 0.34268 57.0222 911604.8333 89.296 2573.32 60 41.573
18.918 8358.75 2917.84 0.34907 66.9883 1182469.4837 116.334 3143.28 81 38.8047
2.333 4898.97 976.41 0.1993 41.3555 692361.9127 62.9062 2700.19 19 42.2305
2.808 5462.91 2191.24 0.40111 34.5308 774825.1827 74.0756 2633.04 35 42.7972
11.733 4236.27 1376.4 0.3249 35.0902 576542.2839 54.2159 1426.57 34 44.3511
19.48 18789 4648.68 0.24741 176.032 2664577.3457 227.503 5732.74 231 22.063
19.051 9738.91 1675.19 0.17201 93.2322 1363725.7922 123.776 3807.99 56 34.7791
14.752 5674.02 1853.21 0.32661 46.7254 796436.4688 76.9661 2431.49 93 41.2553
7.768 8216.7 2693.41 0.32779 94.4424 1130776.8592 137.232 3587.77 89 37.0855
11.358 5896.08 1658.8 0.28133 55.9283 795893.3991 79.9876 2485.42 41 41.5999
1.614 14946.5 4072.8 0.27249 216.353 2085122.2037 256.562 5657.75 94 23.0436
9.363 4565.73 1151 0.25209 42.9583 617896.3304 59.9344 2360.92 53 41.0812
13.838 7617.54 1981.82 0.26016 71.2819 1047713.812 92.1768 3343.58 61 38.166
2.476 16539.5 4418.48 0.26714 231.969 2366937.9474 272.527 5553.59 113 22.1043
2.725 14958.5 3828.99 0.25597 191.592 2114837.6367 211.148 14911.05 97 26.2378
16.725 11881.4 3840.03 0.32319 89.4019 1673047.5814 157.235 4958.48 95 30.4528
18.689 14522.7 6225.63 0.42868 152.567 2003629.6901 207.671 5137.42 80 27.0567
3.987 10234.4 2522.8 0.2465 106.698 1437870.0137 150.189 4308.86 72 32.5975
7.413 4826.28 1574.98 0.32633 46.675 698904.0565 62.7391 2530.64 42 42.6462
12.087 8252.45 2460.87 0.29819 92.6418 1158621.8585 102.585 3585.33 24 35.9061
1.541 21851 5996.54 0.27442 284.586 2988796.8022 309.034 6582.5 286 18.7486
2.415 8398.47 2249.84 0.26788 90.9179 1184997.2157 123.07 3324.29 5 36.047
12.924 6391.71 3124.76 0.48887 58.32 891750.3267 116.371 2466.5 59 41.4431
2.775 12098.5 3534.24 0.29212 134.416 1721125.25 180.494 4814.4 70 32.5284
1.469 8973.19 2564.07 0.28574 94.55 1240681.2877 144.046 3261.37 20 36.5827
6.144 16325 3538.99 0.21678 172.303 2319131.9925 233.597 5163.64 207 26.441
20.705 11451.4 3956.38 0.34549 66.6363 1535619.8567 185.837 5106.38 53 32.9871
5.17 12930.2 4285.8 0.33145 134.075 1761539.6742 187.137 4064.84 220 31.9363
1.297 6678.89 2539.47 0.38022 79.6045 915619.782 98.7725 3254.48 69 38.7218
1.686 7835.64 1993.4 0.2544 68.5657 1083617.1012 110.645 3756.96 25 36.7141
4.019 9727.74 3869.84 0.39781 97.9925 1392642.6769 135.34 3752.01 24 35.1836
9.077 6510.95 1552.65 0.23846 63.2534 920249.6066 82.8222 3456.44 67 38.7741
1.535 4055.92 1181.98 0.29142 34.4125 558202.3683 50.5063 1402.85 17 44.3142
1.209 6894.07 2280.88 0.33084 63.5685 924063.8835 97.443 3143.07 23 40.0845
2.717 13085.9 3414.05 0.26089 170.109 1817319.3223 187.894 4981.72 61 28.1323
16.81 18283.5 7070.32 0.3867 231.065 2457984.8883 355.85 5036.67 211 25.83
1.88 8513.44 2329.4 0.27361 76.8381 1184411.8707 105.24 4011.6 62 34.9152
9.679 18701 5707.76 0.30521 207.431 2585277.1097 294.706 6454.27 242 20.7927
5.307 17838.7 5713.17 0.32026 218.1 2472411.9579 337.304 4970.39 96 26.1402
14.489 13993.4 3955.85 0.28269 169.521 1982190.6469 219.498 5040.33 94 19.9345
3.739 7912.69 2651.92 0.33514 70.4696 1079834.4081 109.222 3411.53 73 36.7581
16.59 6528.95 1799.39 0.2756 63.2109 893784.1024 84.5937 2820.72 33 40.9493
1.872 11129.7 3670.81 0.32982 137.598 1562760.9304 185.173 4353.17 63 32.001
2.821 11049.3 2907.18 0.2631 150.046 1570061.4919 154.422 4094.75 136 31.6278
3.264 8700.53 1965.29 0.22588 102.304 1240026.1818 118.392 3842.47 52 35.0796
16.466 9153.06 2962.15 0.32362 67.1428 1251651.7168 122.463 3433.58 49 36.3523
2.758 8339.92 2761.01 0.33105 89.7088 1168007.8354 122.958 3112.98 18 37.5608
3.229 10625.9 2875.11 0.27057 121.514 1437022.2315 163.79 3829.97 18 33.3008
10.475 10421.5 4040.7 0.38772 91.6869 1490934.212 126.484 4150.11 54 37.1272
3.771 9358.76 2071.25 0.22131 83.0937 1320811.0569 109.905 3999.51 72 34.4162
1.519 6124.28 1351.59 0.22069 59.184 844800.6206 73.9579 2836.48 20 40.1622
11.984 10247 2628.75 0.25653 97.1718 1402202.8844 131.682 4641.6 41 29.4039
2.887 5800.57 2208.99 0.38082 33.3187 822800.0748 79.4469 2590.91 39 42.7567
10.843 4648.76 1759.77 0.37854 46.9062 674306.2811 68.1371 2375.4 58 42.9753
13.188 6541.19 1309.31 0.20016 55.0229 937373.8308 68.7832 3511.46 51 39.7619
3.961 15106.5 3065.17 0.2029 175.573 2153392.1907 231.502 4908.11 86 27.192
2.91 8232.83 2170.05 0.26358 98.073 1151208.6223 129.346 3931.62 53 34.9685
3.105 8421.81 1834.31 0.2178 78.038 1176469.7277 108.48 3788.68 17 34.308
16.69 6784.63 2330.71 0.34352 72.1118 963786.1108 113.225 2968.78 53 38.6417
16.113 8082.4 3186.43 0.39424 78.2157 1126943.6782 113.483 3264.35 26 37.8319
10.141 7687.8 2178.71 0.28339 60.3861 1082019.7354 104.48 3500.31 52 36.5144
7.104 13908.7 4553.57 0.32739 176.744 1920322.3663 271.55 5080.11 113 25.9384
3.268 22449.5 6665.8 0.29692 301.367 3113170.5817 356.178 6277.56 97 19.4511
3.269 6850.68 2087.06 0.30465 63.4101 982151.1629 78.6474 2417.87 77 40.3162
17.088 8892.45 3115.4 0.35034 74.8807 1230830.1 125.869 3570.79 33 38.0644
13.561 7586.8 1981.4 0.26116 70.8891 1030174.7454 83.2994 3471.97 86 34.6836
17.391 7291.39 2299.96 0.31543 62.3961 1038581.7005 99.6521 3120.28 49 38.8715
12.458 7761.95 1991.96 0.25663 55.1816 1089225.9557 94.5088 3516.26 33 37.861
3.844 5918.74 959.08 0.16204 48.4407 817391.7342 63.5485 3058.13 18 39.5624
2.262 5962.79 981.9 0.16467 54.8301 828240.2683 58.7234 3007.86 16 39.9472
19.838 13504.5 5321.35 0.39404 112.909 1937063.4522 193.743 5434.46 98 26.9682
9.512 5120.87 1384.66 0.27039 45.0992 725602.7658 67.8208 2558.9 48 42.2647
1.764 15461.9 5442.05 0.35196 179.146 2163343.8973 267.322 5398.17 159 24.6792
12.985 12436.6 5647.01 0.45406 183.939 1684856.7095 263.065 4666.98 181 30.0734
2.151 12165.2 3174.39 0.26094 158.709 1718189.8121 173.83 4710.58 30 29.0374
1.686 7835.64 1993.4 0.2544 68.5657 1083617.1012 110.645 3756.96 25 36.7141
3.847 10038.2 2416.41 0.24072 110.07 1406337.5358 149.177 4305.84 60 33.4886
16.548 10526.2 5018.33 0.47674 91.4261 1374684.3822 183.52 4110.69 62 33.8932
2.579 9725.02 3009.04 0.30941 125.441 1336183.8956 171.793 3620.57 19 33.8407
11.323 5063.93 1341.51 0.26491 47.0922 645213.1808 75.4128 2027.58 39 43.1398
15.248 8303.03 2787.62 0.33573 89.2316 1174038.8763 122.521 4561.38 46 35.499
2.249 15254.8 5624.19 0.36868 179.872 2150181.8686 261.776 4981.89 23 26.9528
9.738 4624.27 1767.89 0.3823 32.6308 660304.9335 62.8148 1629.29 39 44.8642
14.444 9458.4 3085.49 0.32621 80.9269 1336566.3959 132.427 3661.21 9 36.5835
16.892 7646.54 2037.57 0.26646 63.1476 1064418.8035 102.209 3022.07 30 38.9429
2.969 12962.3 3389.21 0.26146 141.295 1761875.6399 159.817 3971.02 186 32.4022
1.811 8718.57 2175.85 0.24956 84.5926 1244731.207 114.89 4007.1 6 34.1461
3.773 23475.3 7810.56 0.33271 314.557 3271481.3647 393.923 6527.31 92 18.5629
3.27 12672.3 3819.24 0.30138 167.014 1764753.7377 199.874 4835.57 69 26.6798
1.431 15159.1 3868.97 0.25522 186.613 2143498.5364 214.187 5698.56 64 23.1391
3.181 9337.75 2294.71 0.24574 99.4069 1280447.3124 130.913 3611.01 12 35.8489
2.75 15561.9 5335.12 0.34283 242.334 2159682.4354 284.78 5689.74 201 21.9984
2.54 5677.77 1585.45 0.27923 46.506 794675.1815 73.0472 2943.28 15 39.5855
15.983 11339 4490.45 0.39601 99.3379 1565268.6402 170.92 4971.24 113 27.3462
1.39 8830.37 1897.93 0.21493 77.3504 1281269.0575 106.543 3884.29 9 34.8216
16.826 8500.52 2594.44 0.3052 67.2152 1181434.3133 115.498 3470.04 91 37.2092
2.994 8414.54 1327.78 0.15779 85.6937 1177362.9193 105.6 3972.89 54 35.2457
1.308 6931.52 1682.5 0.24273 82.5445 974354.4448 108.406 3835.47 35 36.1431
3.153 12298.1 3863.71 0.31417 141.524 1720198.6773 171.206 4314.69 31 31.4438
1.971 8227.12 2418.52 0.29396 99.3576 1116431.0599 119.291 3472.77 25 36.7758
10.422 10467.4 4077.47 0.38953 93.7805 1425643.6237 137.871 4743.22 46 31.7507
19.619 9900.12 3210.31 0.32426 94.9099 1331103.2908 144.392 4998.27 58 35.655
20.127 18180.7 5069.35 0.27883 177.441 2483589.8684 229.139 5963.59 148 26.6251
3.269 12017.6 3566.71 0.29679 108.658 1655418.7445 182.473 4671.22 123 29.6468
18.119 9811.7 4088.77 0.41672 85.2202 1359582.0997 146.765 5394.62 49 35.887
1.358 6859.06 2257.36 0.3291 56.809 952409.9468 99.8818 3637.62 76 37.5912
12.701 5997.51 1715.81 0.28608 55.6629 817862.0228 85.2411 2453.22 27 40.3369
0.979 22869.8 5440.58 0.23789 323.683 3147677.4371 405.101 6215.8 164 19.8423
1.738 7056.04 2385.4 0.33806 72.7297 970600.1457 99.5021 3750.66 33 36.1048
1.565 10830.7 3159.23 0.29169 124.132 1448863.1427 158.75 4060.81 47 33.8192
0.768 9159.67 1783.56 0.19471 101.662 1294938.7782 132.519 4208.84 44 33.6603
10.584 8684.75 3001.47 0.3456 72.829 1172502.538 124.106 3646.58 75 37.4459
3.406 13725.4 4180.17 0.30455 176.522 1885562.695 237.867 4755.96 28 29.0607
13.09 7355.33 2564.98 0.34872 84.1936 994642.5924 109.939 3526.14 24 36.8147
2.769 6442.67 1726.26 0.26794 65.1427 911111.6776 84.8384 3115.82 27 39.1887
2.352 9687.76 2385.99 0.24628 127.799 1316902.6861 158.781 3605.37 31 34.5618
1.585 7017.18 2690.62 0.38343 65.5682 1028815.6182 93.6411 3219.51 25 38.8346
16.132 5343.44 1789.71 0.33493 65.7266 728700.0796 78.8363 3197.59 22 38.9913
3.014 8741.04 2579.44 0.29509 90.1708 1241534.2427 109.904 4078.17 24 35.5293
13.277 10510.9 3306.85 0.31461 90.7965 1491506.4851 128.979 4390.2 90 32.2985
1.645 13718.9 3371.19 0.24573 181.882 1878622.5756 210.753 4575.18 177 29.1499
3.614 12526.6 3749.97 0.29936 134.871 1690308.6594 176.226 4076.34 178 31.7747
3.572 23484.6 6949.46 0.29591 305.026 3252710.4742 378.384 6348.86 98 17.5782
2.827 12183.7 3484.31 0.28598 101.301 1686820.9609 181.461 4619.5 123 29.9071
17.793 8949.36 2502.92 0.27967 87.397 1194620.8975 116.998 3945.79 34 34.702
13.057 14380.8 3957.63 0.2752 180.115 2048847.7949 206.68 5189.45 58 27.7883
15.673 8023.57 2883.39 0.35936 78.1073 1088187.9285 113.237 2980 12 38.9493
16.073 7398.92 2747.66 0.37135 55.7456 1059499.5176 104.788 3855.29 19 37.0257
11.205 3775.79 1176.86 0.31168 33.9678 514195.1758 48.5693 1339.44 24 44.6292
5.783 6066.59 1461.67 0.24093 54.4777 830303.4142 77.4508 3334.31 50 38.6708
3.255 7828.62 2453.38 0.31338 75.2284 1116441.7345 119.658 3353.28 33 37.4152
15.129 9242.92 3465.62 0.37494 96.7416 1307910.9617 147.102 3717.65 84 35.4623
2.568 10285.2 2751.37 0.2675 118.982 1406553.4387 139.86 4210.04 120 34.3414
11.164 6725.46 1770.12 0.26319 50.4997 933439.5981 81.2739 3184.25 11 38.8012
2.94 12095.4 3315.05 0.27407 155.686 1693432.5705 206.698 4759.98 69 28.6958
6.347 7321.37 2863.42 0.3911 62.1639 1077579.2001 88.7138 3423.44 36 38.3851
16.176 7184.13 2711.06 0.37736 61.4404 975523.7854 110.089 2719.5 48 40.0204
13.158 11990.8 2614.57 0.21804 135.706 1670452.8993 189.077 4910.14 76 23.7675
1.611 5853.68 2028.56 0.34654 74.906 807939.5775 86.0887 3043.02 36 40.2078
7.979 14061.4 5041.72 0.35855 193.129 1906909.7752 277.665 5041.78 102 26.8983
2.475 11086.1 2831.62 0.25542 131.598 1521343.2039 153.226 3749.11 29 34.8223
2.505 16009.8 5477.69 0.34214 244.052 2188247.4993 263.331 5540.74 118 23.9552
1.267 4099.37 1310.89 0.31977 34.1176 560211.0847 49.863 1432.12 17 44.2072
1.275 5433.08 1117.09 0.2056 52.0941 775377.1646 67.5353 2858.26 58 40.4463
0.545 6242.74 910.97 0.14592 47.804 879106.9737 73.1055 2740.75 1 42.0224
1.26 7096.04 2674.9 0.37695 65.7862 1043128.2013 96.8469 3230.64 31 38.8588
9.351 5244.74 1234.14 0.23531 42.4154 734135.8453 67.4942 2708.4 26 41.2341
15.363 12874.5 5815.4 0.45169 146.56 1753907.0383 212.939 5636.11 138 25.443
13.924 7165.91 1445.37 0.2017 69.9293 971510.6402 87.4368 3493.27 70 37.9037
17.486 7779.25 2742.37 0.35252 54.2002 1116923.5133 116.107 4712.9 21 38.4315
1.92 11949.7 2746.99 0.22987 139.91 1668717.0602 193.015 4057.94 70 32.4726
15.537 12573.2 3242.95 0.25792 139.818 1763347.6642 168.917 4669.14 55 29.9565
1.841 10606.8 2083.76 0.19645 150.839 1484757.8102 163.569 4625.43 143 29.8812
11.499 8353.91 2012.88 0.24095 71.0706 1158901.2753 95.7976 3550.58 65 37.1901
1.848 15969.4 5795.22 0.36289 182.484 2209246.2573 262.263 4649.87 31 25.9374
4.483 15129.9 4069.19 0.26895 123.108 2043137.4508 221.527 4727.18 141 28.9539
20.3 13282.5 4915.37 0.37006 122.908 1854697.6842 199.676 4467.33 70 30.0748
1.432 3838.75 1133.19 0.29519 32.1069 526586.5172 46.9391 1398.46 17 44.3908
19.567 8908.08 2279.24 0.25586 88.7867 1252218.7298 118.116 3358.55 106 37.3796
2.118 13426.4 3324.22 0.24758 159.581 1891992.0358 216.169 4973.13 195 28.005
10.033 5574.59 1475.84 0.26474 63.4793 766483.1157 86.8035 2991.1 47 39.9537
2.394 15046.7 3414.28 0.22691 171.111 2116558.1877 228.372 4954.26 84 26.7711
12.816 6919.37 2417.19 0.34933 53.7405 953961.1696 88.2495 2985.66 51 39.911
14.756 6167.06 2009.56 0.32585 49.1643 793035.6007 91.033 2549.67 39 43.7389
4.787 12537.8 3488.34 0.27822 168.299 1728548.2775 214.622 4729.03 117 26.1757
1.356 9097.71 1691.53 0.18592 75.9528 1311205.5267 105.376 3957.36 8 31.5619
11.222 4297.48 1290.77 0.30035 37.0022 581076.2831 50.3844 1429.3 26 44.3182
4.955 6594.64 1546.87 0.23456 57.1282 878684.6983 80.31 3134.24 30 38.7748
6.186 14767.7 4268 0.289 176.33 2044319.4318 257.828 5163.05 95 26.0371
7.599 5524.73 1646.12 0.29795 52.3387 751989.5697 73.4711 3078.23 14 39.737
12.544 5660.66 1961.37 0.34649 50.1957 816856.7385 81.8842 2380.01 63 42.2416
12.246 7088.69 2450.5 0.34569 74.7594 985786.475 112.513 2993.77 34 37.3452
19.413 10134.3 2322.02 0.22912 99.5608 1412430.6508 125.597 3966.15 47 34.0703
9.473 16803.6 4987.82 0.29683 181.255 2338068.5135 258.691 4955.52 54 26.7552
4.319 8645.91 1902.76 0.22007 86.1375 1219842.7432 103.33 3911.1 77 33.0655
2.875 8604.63 2329.15 0.27068 94.103 1185838.1441 115.292 4293.16 126 34.0443
3.016 9924.57 2959.94 0.29824 93.3115 1367829.6654 129.922 3895.1 40 35.4971
4.916 9894.76 2180.54 0.22037 110.595 1394932.3046 125.484 3799.45 58 35.2471
10.771 4932.02 1307.15 0.26503 37.7957 680701.8155 56.5726 2590.5 50 41.8232
19.406 13437.6 5244.61 0.39029 188.659 1796864.8822 247.199 4143.11 89 31.629
12.331 6377.98 2024.85 0.31747 52.9559 904816.245 88.3151 3051.04 5 39.2511
0.919 10775.6 2936.32 0.27249 135.714 1500625.4699 175.967 4649.87 162 28.9956
1.971 9871.39 2423.82 0.24553 120.236 1365259.1649 160.037 4674.96 70 29.1182
2.689 8609.28 1614.15 0.18748 100.206 1217018.0419 120.51 3781.74 44 35.2483
3.274 13918.2 4441.25 0.31909 169 1957096.6565 205.439 4802.05 72 25.886
2.887 5140.23 1587.11 0.30876 56.0052 710769.0327 67.0043 2543.99 33 41.8697
14.07 7803.2 2821.01 0.36151 57.5786 1118297.6108 111.201 4809.69 20 40.2415
2.645 9141.62 3085.78 0.33755 106.39 1266922.9624 127.556 3618.49 11 35.5022
1.307 8687.47 2200.8 0.25333 92.3635 1230190.609 126.465 3941.31 160 33.9897
14.642 9390.32 3214.72 0.34234 100.874 1313663.1408 108.011 3587.25 37 35.2238
10.665 6263.33 2094.72 0.33444 59.5549 900939.0514 82.7302 3229.37 23 38.8484
5.022 13681.2 4092.02 0.29909 167.37 1886101.7782 210.438 4794.22 120 28.3893
9.351 5318.83 1845.07 0.34689 45.7529 765492.3225 78.5888 2577.79 50 42.0558
16.231 7714.16 1604.08 0.20793 72.1476 1088471.3848 91.1895 3066.92 46 39.3653
1.94 7123.29 2076.49 0.2915 67.4393 1002250.9187 92.2477 3622.17 32 37.8494
4.122 12517.1 4300.11 0.34353 104.965 1716343.2755 174.031 4622.3 143 29.6568
6.84 18746.5 4451.54 0.23745 205.87 2667086.6668 266.506 5484.06 231 23.23
1.441 9181.06 3343.28 0.36414 89.1905 1223677.7379 140.489 3783.87 55 35.9708
3.835 10306.9 2808.28 0.27246 116.621 1442488.2395 147.357 4343.17 65 33.1871
1.541 10193.6 3150.95 0.30911 127.562 1363098.367 166.662 4019.18 37 33.5786
3.361 12353.3 3904.34 0.31605 152.778 1727460.3665 166.724 5126.29 45 28.2955
17.451 8533.9 3412.1 0.39982 68.5759 1198411.5454 135.506 4086.81 16 34.9627
8.708 6856.68 2348.32 0.34248 66.8689 974710.2727 92.1915 3097.41 32 38.8942
15.214 5711.34 3016.31 0.52812 68.4853 757526.4831 118.642 2756.57 58 40.5175
16.557 13719.1 5573.37 0.40624 127.584 1903705.9974 207.583 5221.13 113 30.3813
8.85 7494.34 1239.85 0.16543 65.3879 1039249.5413 68.9889 2810.65 23 40.0679
2.723 14910.1 4745.84 0.31829 174.824 2070644.6118 232.173 5141.15 175 27.111
10.576 9287.68 2190.95 0.23589 83.5682 1332837.1078 104.351 3695.73 10 37.4172
8.412 6842.07 1817.87 0.26569 52.9912 966786.2528 95.1921 3217.33 8 40.5012
2.858 11107.5 2884.35 0.25967 147.072 1580453.652 155.29 4121.25 120 32.3746
1.678 15139.6 4824.86 0.31869 212.041 2118404.5909 261.951 5363.45 296 24.5716
12.731 10545.7 2911.57 0.27609 56.9443 1439895.7247 146.085 5618.45 28 41.8447
14.151 10622.8 3650.56 0.34365 98.7847 1426168.5939 159.93 5598.12 34 34.7296
1.484 3847.84 1225.64 0.31852 34.1143 524318.4046 48.9537 1400.41 17 44.2935
18.57 11582.5 4366.34 0.37697 92.6439 1602771.7708 162.831 4335.92 105 32.1908
13.23 6668.62 2155.4 0.32321 66.3064 876394.5064 91.0934 3652.95 79 37.7499
19.961 15398 4656.06 0.30238 160.09 2189948.453 220.467 6854.93 83 23.1093
9.074 12595.4 5426.86 0.43086 112.777 1795703.6857 199.133 4949.97 62 30.7863
1.946 8996.48 2083.66 0.2316 108.333 1226607.3751 139.092 4007.47 36 34.128
3.739 11051.6 3150.91 0.2851 100.816 1575153.9174 140.46 4194.26 58 34.2751
2.005 6501.03 2021.06 0.31088 58.3195 908789.1761 94.3574 2738.66 48 40.5528
0.971 11401.3 2473.78 0.21697 133.652 1606415.6845 191.431 4536.9 48 30.4485
3.835 14313.1 3985.8 0.27847 178.661 1990754.6475 209.045 4968.54 112 27.6339
0.797 9633.3 2741.96 0.28463 108.284 1324279.6998 156.255 4142.61 74 33.2904
12.36 6365.52 2723.2 0.4278 59.0385 875999.3447 107.839 3323.73 60 38.2363
3.807 18672.2 6193.64 0.3317 239.04 2552546.8352 324.361 5546.42 96 23.3424
1.737 7829.4 1490.76 0.1904 79.342 1099387.3281 103.305 3770.02 15 34.3319
5.366 7684.1 2370.64 0.30851 69.2939 1077601.8668 100.681 3743.44 51 31.2823
1.528 3900.21 1203.07 0.30846 35.213 532363.8684 49.6825 1400.66 17 44.2558
7.85 5269.48 1301.25 0.24694 48.3985 732945.2373 63.2367 2193.49 2 41.6386
4.125 5850.88 1126.85 0.19259 52.1859 807425.9107 69.8971 3057.38 30 39.836
2.335 5756.39 1615.94 0.28072 64.9757 721473.2375 89.2036 3112.33 16 39.4241
14.352 9490.09 2931.14 0.30886 97.6559 1319533.9729 123.984 4773.71 152 30.6599
2.221 11993.7 3121 0.26021 164.771 1669552.0202 185.577 4686.8 45 29.5031
11.955 4232.65 1377.56 0.32546 36.1128 571236.3614 53.0907 1420.72 29 44.4408
14.192 6958.24 2915.31 0.41897 79.0716 964357.3595 124.739 3190.36 89 38.0775
1.191 7579.33 2173.46 0.28676 72.1861 1034347.3064 117.127 3079.35 80 39.0502
20.659 12218.3 3612.62 0.29567 140.157 1709029.2643 189.951 4169.92 42 31.7854
18.505 8389.69 2988.68 0.35623 66.8369 1196267.8274 107.352 4304.96 61 38.224
19.072 8920.86 2114.2 0.23699 95.1198 1240273.5739 115.167 4461.83 130 27.3178
2.91 14017.8 4036.41 0.28794 196.953 1898038.6796 216.228 4689.05 168 29.0676
3.126 5979.83 2015.32 0.33701 57.5484 822932.0254 90.4662 2674.97 43 40.6742
2.343 15216.7 5293.8 0.34789 231.317 2042896.5476 256.435 5210.49 118 26.2777
9.257 9007.29 3415.47 0.37918 89.7117 1274128.9754 147.194 3514.77 61 37.6381
19.418 14095.6 4101.02 0.29094 172.25 1978079.4998 185.553 5364.84 143 23.8059
2.783 8712.43 2766.76 0.31756 100.936 1195261.3887 146.145 3331.27 21 36.1141
1.964 11084.9 3021.93 0.27261 139.54 1531665.9264 163.472 4445.59 90 28.7561
20.785 14386.6 3968.47 0.27584 176.07 1999059.9439 234.628 5069.15 193 21.4382
1.931 8485.31 2387.78 0.2814 82.4057 1208270.0706 132.31 3806.86 3 36.3682
12.326 6756.5 2315.05 0.34264 67.6503 946782.202 93.8761 3246.15 41 39.1172
1.763 15428.6 5293.01 0.34306 239.37 2093752.4278 254.082 5426.93 130 23.8448
12.896 8776.99 2710.96 0.30887 92.8389 1233642.355 121.832 4609.5 121 33.2394
1.275 14868.4 3111.15 0.20924 181.19 2065946.8514 221.103 4702.23 37 28.519
7.714 5854.86 1918.45 0.32766 55.7354 799204.7647 83.7547 3217.33 13 39.4789
5.24 5873.43 1898.03 0.32315 67.7419 812651.9523 93.415 2792.03 39 39.8042
4.035 11955.2 3915.08 0.32747 146.208 1677138.8995 179.061 4825.82 44 27.3875
2.267 21687.9 6786.19 0.3129 298.935 2963630.4486 316.883 6538.25 263 18.5808
13.453 7267.34 1791.73 0.24654 72.4993 1032609.2287 85.486 3201.01 47 36.8076
2.388 11583.2 3206.4 0.27681 147.281 1664377.5218 163.086 4108.25 131 32.3496
3.541 17471.2 5131.29 0.29369 230.854 2451399.5117 279.983 5738.99 142 21.0352
9.166 6111.88 1523.04 0.24919 69.0883 856900.4127 83.2581 2789.27 74 39.555
13.025 7179.66 2054.23 0.28611 72.23 977457.7331 113.319 3347.69 51 38.0057
2.161 4397.51 812.31 0.18472 40.821 579416.5135 67.3081 2564.65 13 44.6214
16.083 12449.2 3818.64 0.30673 130.286 1735610.7977 161.239 4990.91 154 29.242
1.546 13668 3811.72 0.27887 159.107 1911416.6901 234.943 4443.28 82 30.0694
4.221 4894.36 2087.69 0.42655 37.684 690139.9992 64.9837 2619.76 39 42.7294
15.652 8782.33 3595.33 0.40938 107.018 1178305.9249 141.826 3582.77 67 36.8466
3.993 9588.3 3779.4 0.39416 89.7906 1345169.0834 148.285 3983.08 131 34.0411
0.641 4815.01 948.26 0.19693 45.3503 693078.0896 54.6066 2183.33 80 42.8312
5.792 14927.1 3677.42 0.24635 157.199 2065433.5209 213.377 5757.89 105 25.2547
11.295 5840.13 2079.42 0.35605 40.5785 792665.2821 92.8904 1854.76 7 42.0951
5.28 18845 5143.53 0.27293 264.832 2617194.5305 287.627 5524.55 205 23.6909
1.361 6557.86 2354.67 0.35906 80.2877 896189.7245 91.2081 3266.93 60 38.4477
8.089 5879.17 1834.85 0.31209 54.7437 804905.2319 78.6281 3202.8 13 39.5285
15.58 7264.35 3358.94 0.46238 35.7661 1027658.8248 103.146 2725.09 65 38.6137
2.236 6845.95 1689.63 0.2468 63.6453 959751.8577 84.8868 3652.69 23 38.0691
15.503 5441.93 1474.82 0.27101 50.0433 690500.0248 74.6932 2558.82 32 41.6227
4.211 9959.05 2789.74 0.28012 96.4091 1397513.3005 128.767 4306.84 47 33.0915
1.642 12793.9 3421.03 0.26739 155.063 1815871.4338 167.7 4866.89 31 28.7068
3.082 4942.25 2011.86 0.40707 34.7229 700928.7704 64.4044 2528.99 39 42.7253
8.071 5761.18 1935.44 0.33594 54.9343 790266.4387 81.6474 3181.43 15 39.4678
2.229 4067.46 774.22 0.19034 41.1929 535651.2479 62.102 2556.12 12 43.4703
3.857 11745.9 3475.66 0.2959 105.607 1621527.2013 166.783 5862.92 9 33.3509
12.744 6035.48 1935.79 0.32073 65.0905 822002.8699 85.5888 2975.89 43 39.7569
13.294 11975.6 3772.08 0.31498 126.586 1694432.0001 175.043 4611.32 147 30.5623
3.665 6898.25 1380.92 0.20018 84.206 924883.8491 112.499 3352.55 67 35.4125
2.869 7916.78 2491.08 0.31465 71.0284 1073817.3982 110.308 3544.2 79 35.3833
1.879 10281.9 3263.66 0.31741 125.305 1364648.8717 165.459 4040.38 40 31.3929
1.649 5895.48 1902.12 0.32264 69.9331 822618.9538 84.0837 3034.16 35 40.2843
1.502 15158.5 3559.47 0.23481 182.179 2128071.3023 223.107 4742.51 30 28.2509
16.259 13515.4 4483.91 0.33176 174.565 1842150.7226 245.128 4854.77 143 28.297
1.655 4171.78 1267.82 0.3039 36.7568 575714.9976 51.1491 1387.75 17 44.3803
12.701 5997.51 1715.81 0.28608 55.6629 817862.0228 85.2411 2453.22 27 40.7298
0.96 23203.9 5667.15 0.24423 334.525 3186500.4092 398.152 6224.62 163 19.8509
20.357 9161.8 2871.69 0.31344 108.822 1273677.7105 141.473 3974.91 93 32.6058
13.872 10721.2 2655.04 0.24764 73.6149 1526980.4121 137.672 4205.52 66 33.5365
3.816 10021.2 2965.56 0.29592 105.314 1367541.1576 148.339 3917.64 32 33.9268
13.165 7071.6 2408.98 0.34065 58.8192 1018899.5055 94.1086 4298.14 25 36.224
4.793 5440.25 1678.27 0.30849 45.5839 756988.2997 75.9217 2020.73 3 42.2367
1.399 8761.12 2420.99 0.27633 104.578 1200262.5547 131.261 3268.26 4 29.4227
14.227 19216.7 5521.05 0.2873 208.443 2633654.148 290.826 6054.46 235 20.7279
2.723 7599.54 2450.26 0.32242 72.2587 1050556.5836 103.434 3229.48 11 46.5464
2.03 10255.3 2590.13 0.25256 115.663 1426715.2151 129.898 4280.27 59 33.5859
10.058 6323.08 1321.34 0.20897 67.2205 841391.7076 79.798 3067.06 35 38.403
2.468 10204 2646.78 0.25938 116.985 1397592.7537 141.965 4212.08 123 32.5268
8.392 9272.38 2372.99 0.25592 77.6755 1281058.6869 110.739 3747.54 52 34.5205
2.071 12965.3 3525.4 0.27191 164.937 1799006.5245 194.612 5104.8 65 28.5742
8.187 14280 4487.22 0.31423 150.08 1955056.9551 225.18 5400.14 13 30.6258
1.283 7418.72 1955.32 0.26356 90.2236 1038293.7197 103.374 3905.78 25 35.6903
5.637 5405.44 2326.79 0.43045 53.0242 732863.9692 86.7353 2507.27 64 41.1769
2.56 7750.14 3254.36 0.4199 75.2975 1095715.348 122.609 3284.17 35 37.8859
1.692 6362.2 1742.98 0.27395 67.4458 906239.0984 81.7128 3102.38 8 38.8268
5.762 6176.89 1328.48 0.21507 53.0043 881177.2932 67.3469 2953.41 26 32.3692
1.582 7945.53 2045.29 0.25741 83.7971 1137150.6754 110.705 4053.19 90 34.9792
10.701 5589.37 1754.08 0.31382 52.118 760307.7929 89.2649 2936.08 14 40.453
12.834 8038.47 1408.64 0.17523 62.1192 1126907.7201 89.1238 2969.74 30 38.4898
4.818 7354.6 2025.71 0.27543 58.1425 974718.1111 90.6879 3115.46 49 39.8974
3.266 8378 1724.31 0.20581 97.8196 1174543.2463 123.254 3789.39 45 35.0834
13.199 8046.04 2541.29 0.31584 57.5837 1109903.8713 109.886 3436.52 36 40.9838
2.425 10957.4 2178.75 0.19883 128.477 1490278.144 145.851 3734.92 17 34.7273
3.573 8917.51 2301.04 0.25803 98.6169 1258363.2213 137.242 3774.67 41 35.2928
1.806 6727.79 2142.79 0.31849 63.3557 907510.0958 98.6305 3191.48 23 39.7872
9.83 7096.02 2399.66 0.33816 60.1236 1027370.892 92.8701 3571.72 41 46.5464
5.368 14640.9 4524.4 0.30902 159.934 2025950.2697 209.778 4947.86 89 27.8781
1.769 8067.24 2275.93 0.28212 89.7446 1131128.2881 102.425 4017.37 21 35.8618
1.266 8288.95 1764.14 0.21283 78.5353 1188882.1036 99.8269 3942.38 9 34.714
0.918 10105.4 2048.52 0.20271 102.392 1426628.6247 140.191 4313.89 51 33.2554
17.082 6699.14 1900.6 0.2837 60.3641 878267.8567 91.0114 2868.21 42 39.6363
17.696 9847.26 3998.71 0.40607 89.3896 1422543.5507 142.204 3569.18 84 35.7519
10.203 16828.2 6022.62 0.35788 129.032 2253111.295 272.982 5602.58 157 24
10.202 18816 5214.85 0.27714 200.948 2605886.8545 289.683 6274.4 239 19.4941
12.291 4488.7 1641.8 0.36576 40.8412 618204.365 59.6505 1820.04 47 43.9881
2.558 14623.4 3841.29 0.26268 160.907 2109642.6945 198.891 4919.04 31 28.8936
6.345 11564.4 3874.47 0.33503 128.74 1597669.9264 153.394 4788.61 75 29.6564
2.408 8894.35 3110.92 0.34976 92.2818 1200809.0323 125.24 3345.91 80 38.0448
16.92 13013.3 4660.01 0.35809 148.072 1869120.0075 231.383 4699.23 122 23.6234
3.379 13127 3944.42 0.30048 143.659 1811647.3997 205.062 4533.98 43 29.7264
2.337 9044.93 2690.74 0.29748 96.1911 1249772.2301 124.255 3882.97 28 33.9623
15.197 7453.88 2959.13 0.39699 58.6885 1058225.824 113.227 2805.23 68 40.4711
4.668 7857.26 1920.75 0.24445 76.4435 1074693.0721 97.5646 3616.86 39 36.8104
1.563 13956.6 4372.98 0.31332 174.306 1923832.0233 207.782 5243.94 176 26.9695
1.785 14479.2 4766.69 0.3292 156.892 2083592.6201 223.068 5707.02 78 25.1277
18.273 8909.92 2573.21 0.2888 88.229 1229166.5712 108.468 4092.86 38 30.6493
6.147 6504.69 1601.23 0.24616 55.802 867365.7729 77.8755 3240.31 33 38.6035
4.391 6334.8 2287.93 0.36116 82.7623 758607.3293 124.561 2103.57 90 41.3378
2.283 10912.7 3701.08 0.33915 128.332 1454042.347 168.524 4096.12 50 33.3544
14.318 8332.61 2487.95 0.29857 85.5382 1144664.7611 139.98 3699.87 79 37.0086
9.412 9600.9 3149.31 0.32802 93.9598 1331251.9417 129.778 3468.41 66 35.8643
2.954 7537.66 2982.66 0.3957 109.989 1021758.6838 135.06 4021.6 43 35.1134
0.479 8614.67 2074.13 0.24076 99.734 1205366.5689 121.43 3261.36 4 36.786
11.575 5591.14 1495.76 0.26752 63.9793 758191.2958 82.9825 2761.4 22 40.47
14.36 7246.83 2354.01 0.32483 62.0457 1026057.345 101.376 3644.15 38 38.1242
14.394 7796.47 2363.3 0.30312 111.793 1057660.2521 129.514 3931.19 73 35.2542
4.75 8441.88 2008.05 0.23786 89.4945 1189051.1509 112.542 3813.71 68 31.7864
4.546 16866.6 6345.16 0.37619 183.706 2365513.8385 261.404 5572.1 166 26.0779
1.512 8841.04 1719.34 0.19447 83.7295 1271385.7138 118.414 4035.76 105 34.9864
3.947 21487.7 6646.12 0.30929 255.803 2999125.9882 327.015 5539.45 84 23.1368
4.071 4959.22 1536.09 0.30974 45.8365 678647.1511 61.1682 1910.12 14 43.637
16.216 7108.55 2213.11 0.31133 66.4172 1015164.6777 105.781 3455.73 19 37.4432
15.723 5250.48 1376.82 0.26222 41.5118 732886.5296 74.6019 2802.96 27 40.5653
2.725 10306.3 2109.74 0.2047 90.6874 1451665.1372 128.01 3617.34 125 35.9545
11.413 8436.05 2138.14 0.25345 98.3222 1164338.0761 101.958 3444.38 46 35.6652
1.025 6025.02 788.63 0.13089 52.3974 855892.5993 66.1001 2752.91 1 42.1438
3.559 7908.45 1938.32 0.24509 95.8701 1063505.5181 121.776 3859.74 27 34.6416
12.887 7772.72 2782.7 0.358 63.3027 1070065.3088 124.362 3268.11 60 38.4986
3.038 10646.5 3161.3 0.29693 128.606 1458312.7707 152.476 4876.91 71 29.5147
6.458 8319.96 2510.81 0.30178 67.6949 1138728.0212 104.614 3737.39 58 36.7905
2.761 16216.4 4176.99 0.25757 197.239 2137656.6098 267.933 5226.34 187 25.7251
16.013 9877.34 3032.77 0.30704 106.059 1352701.2807 145.897 4269.94 113 33.6152
2.67 22164.4 7614.83 0.34356 182.68 3147776.4575 362.872 15827.65 95 26.6866
2.097 12270.6 3279.09 0.26723 156.528 1688912.0906 191.075 4074.44 59 30.6616
3.513 8274.37 2472.52 0.29881 83.6552 1170765.5095 114.575 3603.75 28 36.903
2.702 8245.27 2437.73 0.29565 83.7021 1181488.9633 113.64 3903.55 42 35.6526
10.88 4962.11 1669.52 0.33645 32.2093 708220.216 59.0348 1273.75 40 44.8371
6.686 16534.3 5228.3 0.3162 180.118 2285043.7183 243.49 6627.68 93 27.8253
1.969 6226.04 1401.21 0.22505 69.4464 896941.076 74.121 3057.94 12 38.9524
3.303 6221.4 1899.33 0.30528 56.4074 893309.5104 81.0269 2584.15 59 41.5307
17.186 10321 3059.7 0.29645 92.8307 1448243.9118 143.795 3844.11 128 34.445
5.115 8012.87 2493.62 0.3112 94.8372 1083942.0118 129.607 3867.43 38 35.4204
4.332 8707.15 2282.38 0.26212 79.3916 1224444.8268 101.423 3764.52 40 35.0684
1.901 16472.5 5283.39 0.32074 213.365 2281668.6253 251.262 5420.72 286 24.0454
2.938 9481.66 2395.68 0.25266 96.9966 1332973.4503 133.213 3543.65 123 35.6194
5.265 7709.7 1313 0.1703 77.07 1047869.8777 97.1864 3057.84 36 35.0605
2.072 15530.9 5587.16 0.35974 238.011 2111877.4954 255.127 5430.46 127 23.8237
5.382 4792.3 1154.63 0.24093 50.3265 627099.4059 77.5987 3137.48 22 40.1624
2.287 14642.1 4955.5 0.33844 162.836 2134092.5805 283.56 4919.9 76 27.261
0.674 9289.3 2687.22 0.28928 101.451 1271805.5606 161.873 4128.81 72 33.1849
1.451 8846.31 2334.99 0.26395 81.5471 1269896.4262 117.349 4043.17 100 34.9319
10.142 8471.57 2702.65 0.31902 93.6389 1164562.0202 113.749 3936.79 38 36.039
2.412 16515.7 5405.95 0.32732 208.846 2173129.6486 264.063 6056.75 255 21.7321
5.393 15670.7 4301.91 0.27451 200.647 2133626.0963 247.767 5132.49 85 25.2711
6.568 12606.9 5021.9 0.39834 74.2201 1735071.5697 180.223 4357.39 102 31.0892
2.23 7348.85 2495.6 0.33959 75.3973 1005298.3862 103.395 3815.76 36 36.4173
9.394 10828.8 3789.82 0.34997 99.0582 1498039.8802 152.435 4269.8 32 34.7976
16.523 7363.17 1913.5 0.25987 61.1006 1063761.639 99.4046 2865.71 37 37.5226
10.363 19240.5 6927.89 0.36006 190.457 2709372.7709 270.4 5443.21 62 27.5188
11.663 7045.12 2386.39 0.33872 50.413 955624.0626 100.531 2774.62 43 40.0199
15.677 6889.01 1714.87 0.24892 77.8161 928484.2291 101.04 3312.31 17 37.21
10.056 4281.91 1917.83 0.44789 36.3618 572027.912 68.4286 1479.58 35 43.7689
16.935 8072.4 2570.41 0.31841 97.7585 1010039.139 147.596 3451.01 103 37.4559
0.732 6081.95 921.01 0.15143 45.4568 856243.2865 73.6534 2676.31 1 42.1781
4.819 13100.8 4773.97 0.3644 158.227 1823647.5598 205.544 5070.19 117 27.3116
1.89 13323.7 3315.85 0.24886 180.076 1823349.4438 211.305 4578.5 173 28.8925
1.931 7879.32 2634.78 0.33439 79.1298 1079884.1307 109.161 3119.49 114 37.8651
0.671 5032.17 958.43 0.19046 44.6877 723519.2352 59.0087 2186.27 81 42.8088
1.746 15392.8 4723.64 0.30687 176.43 2118768.2372 259.161 5386.95 167 23.9358
3.052 11792.2 3757.52 0.31864 109.358 1705474.422 190.858 4435.14 20 32.3231
2.676 14529.5 4380.31 0.30147 207.832 1893013.9332 235.454 5829.48 242 21.9713
17.611 7646.63 2601.99 0.34027 66.4034 1085839.8463 103.549 2991.72 74 37.3685
2.073 13614.3 3796.36 0.27885 172.157 1879564.3348 197.959 5100.57 64 26.6874
4.65 13715.4 4547.53 0.33156 157.395 1893727.8795 197.78 5007.9 75 27.3705
10.721 7192.72 1780.04 0.24747 62.641 1017703.4378 90.1098 3319.26 17 36.3503
2.938 6455.91 2289.36 0.35461 59.5162 886702.071 86.6325 2741.39 47 40.2761
1.986 7615.37 1948.47 0.25586 82.91 1029390.1703 130.181 3546.72 42 36.263
1.793 3864.97 1053.02 0.27245 34.1935 550308.7297 45.6028 1776.45 12 44.501
16.459 17871 7216.64 0.40381 193.868 2506332.1741 262.923 5216.9 119 26.8505
6.349 6345.88 1709.06 0.26931 72.6633 840252.4561 92.1897 3628.43 71 34.9113
13.827 8662.21 2188.68 0.25266 88.3067 1160300.7543 107.216 3796.96 25 36.2091
2.079 9794.69 2876.21 0.29364 99.6202 1337376.7685 150.652 3838.93 119 34.8531
9.868 19541.4 6076.85 0.31097 206.662 2697068.4554 317.968 6299.13 237 20.0897
2.131 10488.6 2389.16 0.22778 123.716 1431193.7176 146.515 3638.58 13 34.7684
14.051 6667.75 1946.02 0.29185 52.0873 900891.9445 104.37 2644.55 33 40.6091
1.62 5683.87 1145.93 0.20161 51.2704 822016.2324 71.0241 2864.46 56 40.2968
2.971 7917.52 3277.11 0.4139 80.6365 1122584.5689 121.752 3302.89 45 37.7346
1.352 9042.9 2479.64 0.2742 110.408 1239761.8437 149.851 4076.62 80 33.6863
2.738 13437.4 4125.82 0.30704 169.988 1896305.4182 213.492 5001.84 199 27.5569
5.853 9571.76 2467.9 0.25783 117.443 1313252.6199 135.571 4162.15 120 32.8752
13.41 5093.26 1502.56 0.295 44.8954 663754.8858 70.448 2022.61 35 43.1914
12.334 4187.48 1603.22 0.38286 35.688 562494.1632 57.444 1418.18 31 44.6032
8.354 3124.09 1155.68 0.36992 24.8489 427736.5329 40.6867 1356.57 2 45.7252
13.858 17528.1 5342.69 0.3048 206.604 2506246.3611 292.501 5536.19 277 19.2975
4.816 6078.17 1619.52 0.26644 50.1178 764164.3381 87.2886 2614.7 26 42.3502
3.876 5768.89 1635.91 0.28357 64.3121 769504.3587 82.4737 2789.57 27 40.8005
2.137 4693.25 883.79 0.18831 44.5076 634666.3717 65.1147 2632.24 11 42.8899
19.23 9295.53 3715.08 0.39966 66.3188 1288224.2306 138.096 4016.77 86 38.7168
1.815 9544.42 3563.1 0.37331 91.1501 1258401.4242 148.338 3660.4 52 35.6765
4.166 8761.41 3255.79 0.3716 80.9209 1184137.4213 134.283 4312.39 36 34.8133
5.487 7329.79 2499.9 0.34106 59.3489 1010399.3164 89.0749 3300.19 31 38.0899
5.269 9365.9 2117.42 0.22607 84.152 1322280.2344 111.885 4808.61 45 32.6066
3.249 8075.82 3184.03 0.39426 88.2 1116588.795 119.719 3673.43 97 35.2532
2.352 14263.2 3613.9 0.25337 204.033 1989802.624 239.281 4916.2 122 27.1215
1.772 7701.32 1789.32 0.23233 68.3435 1114213.9945 99.6132 3037.45 15 34.3525
2.198 9141.55 2687.28 0.29396 89.4391 1283192.9138 121.742 4408.27 41 33.5176
1.772 5662.92 1234.13 0.21793 50.5806 785552.187 67.1784 3279.27 59 40.2288
8.844 4941.33 1465.78 0.29663 37.9478 695625.9128 72.4075 2453.4 44 41.4984
2.135 17165.6 3795.68 0.22112 215.414 2433994.8262 261.895 5576.64 92 23.4821
3.889 6353.07 1341.41 0.21114 55.4114 855973.8918 79.3717 2446.79 33 41.2578
13.617 6349.84 2580.76 0.40642 52.9966 902823.4136 92.6778 2610.93 83 40.441
14.253 5798.14 1536.26 0.26495 43.3242 798760.1608 86.8 2810.65 39 40.9084
15.775 8921.47 2322.81 0.26036 57.9111 1264896.2741 98.91 3669.79 26 37.3684
2.111 7153.63 2379.4 0.33261 77.894 990355.0247 99.3868 3727.93 32 36.7208
2.232 7646.5 2025.89 0.26494 91.0568 1088954.3675 106.068 3459.35 86 36.7405
1.792 8406.56 2362.69 0.28105 91.8378 1150525.2094 120.243 3409.03 119 36.5712
1.481 8413.17 2126.49 0.25275 73.52 1218046.5559 101.244 3154.08 12 37.3161
10.901 7136.09 2485.18 0.34825 60.5214 936968.9201 118.645 3289.3 5 39.8058
2.322 6404.89 1633.7 0.25507 52.1058 896896.0965 76.2758 3461.01 60 38.323
4.437 9759.95 3299.54 0.33806 93.2773 1394731.6418 143.226 4076.19 104 33.8766
15.295 9455.76 3383.04 0.35777 79.9725 1313744.8275 130.83 4089.37 42 33.3666
6.483 10636.5 3902.66 0.36691 92.1203 1508596.1701 138.065 3794.63 4 36.0686
6.226 5802.3 1362.89 0.23488 60.7036 790263.7444 83.3143 3003.96 49 38.2173
6.812 6150.87 1375.94 0.22369 67.1819 857824.9058 75.936 2854.47 74 39.2595
1.508 6401.34 1541.57 0.24081 75.6127 855995.1677 92.3182 3455.63 81 37.3925
2.19 14497.7 3472.45 0.23951 183.28 2032056.5942 197.535 4002.03 146 32.4638
18.741 8119.4 3003.36 0.36989 92.5203 1096442.6071 159.312 3888.11 77 35.1538
3.297 12994 3785.49 0.29132 166.398 1800339.6961 202.037 4841.8 69 28.2376
3.942 5335.47 775.22 0.14529 56.838 734971.8338 54.7702 3005.12 15 39.6935
3.17 8992.93 2166.42 0.2409 100.69 1271679.4889 126.067 3812.7 52 35.142
15.404 7806.93 3084.7 0.39512 71.9792 1104824.2782 114.019 3170.58 43 37.7961
12.843 7051.57 2938.66 0.41673 53.1901 986951.4057 124.161 2603.56 70 40.2002
2.623 12018.2 3149.6 0.26206 152.064 1712656.0331 170.365 4717.21 27 29.019
4.144 11984.6 3182.35 0.26553 144.756 1605850.4392 193.193 4505.84 55 31.4228
0 13741.3 4086.78 0.2974 147.053 1873468.7138 205.763 5715.06 20 30.5898
2.932 15112.4 5470.59 0.36199 188.102 2081073.0286 228.02 4680.39 42 25.7814
11.011 9950.98 3637.88 0.36558 88.9358 1376314.0715 136.864 3812.48 49 34.7681
11.348 3954.5 1206.8 0.30517 36.1699 536478.8466 50.8044 1386.46 32 44.5309
9.357 7157.17 2937.67 0.41045 73.031 967946.391 117.458 3347.32 69 37.2687
18.156 9552.44 3931.33 0.41155 86.9237 1303576.4263 129.596 3984.27 37 35.6842
1.05 11662.5 2429.16 0.20828 155.754 1650806.1144 178.793 4601.2 50 30.0134
1.951 9046.45 2049.49 0.22655 99.9678 1236841.4172 140.902 4020.2 42 34.0341
2.199 10431.7 3846.94 0.36877 135.02 1368498.519 198.203 4562.86 175 30.6638
11.266 7649.79 2131.69 0.27865 53.8724 1068451.9363 92.0834 3016.3 16 46.5464
9.987 13770.8 5108.59 0.37097 199.45 1818316.0093 262.645 4752.86 106 25.578
1.738 12406.8 3594.44 0.28971 151.083 1778717.3846 177.514 4717.93 23 28.9682
4.973 13186.9 4219.33 0.31996 136.436 1857366.2287 185.331 4508.58 40 30.586
11.61 7161.66 1610.81 0.22492 63.9223 983330.4973 91.0553 3463.26 39 37.1292
1.606 7562.76 1809.1 0.23921 77.0429 1019021.6053 119.989 3508.74 37 46.5464
3.004 13264.1 2878.53 0.21701 189.829 1823145.3046 245.048 4932.04 129 26.9484
13.428 5605.32 2646.19 0.47208 53.2878 782967.6658 91.111 2600.58 65 40.7262
1.265 13021.3 3578.8 0.27484 156.301 1801194.1994 200.665 4857.07 196 29.593
15.38 7028.9 2107.51 0.29983 59.5841 991186.6681 90.115 2595.99 33 36.2429
20.562 19597 7825 0.39929 128.226 2811250.8322 297.326 8562.19 109 29.3758
2.512 10971.4 3266.29 0.2977 140.515 1572856.9504 165.783 4136.53 122 32.2607
11.699 6654.8 2059.34 0.30945 54.2421 901455.6675 96.8741 2495.13 33 41.073
16.813 8617.61 2435.59 0.28262 62.8206 1207117.4215 114.864 3775.24 18 38.9999
8.809 5226.28 1817.84 0.34782 43.7374 762604.1696 69.7097 2508.73 44 40.0357
2.776 15275 5097.74 0.33373 194.064 2008800.8958 225.168 4319.89 107 30.5253
1.872 11469.2 2932.74 0.2557 103.84 1620194.4487 146.608 4622.02 54 33.3957
3.104 10101.4 3980.28 0.39403 87.0367 1407515.1537 143.93 4142.07 116 33.0897
5.61 4642.74 891.86 0.19209 44.639 617583.2646 56.9192 2619.58 11 42.6655
14.806 6334.62 1259.03 0.19875 58.2219 856204.4832 85.1749 3354.28 64 38.5032
7.461 4758.34 880.32 0.185 46.6973 600839.9082 62.7266 2022.78 35 43.6501
18.739 10927.8 4359.14 0.3989 69.9628 1534259.3456 172.869 4666.57 22 31.247
13.467 7899.88 3003.43 0.38018 81.7362 1087354.9472 113.452 3798.31 37 33.5317
0.517 8777.89 2210.32 0.2518 97.4994 1233586.4074 126.62 3240.61 4 36.8514
4.944 4923.82 1533.79 0.3115 44.554 676613.9802 64.7685 2266.19 17 42.4307
20.975 17785.9 5314.08 0.29878 177.297 2494676.3415 230.416 5931.32 65 23.8356
11.154 8416.47 1772 0.21053 80.7758 1197288.077 106.356 3773.4 90 36.337
2.949 8532.55 2071.63 0.24279 98.8767 1198311.6831 122.141 3793.98 46 34.9433
0.876 8436.45 1778.87 0.21085 70.7901 1214530.358 111.625 4073.94 100 34.7796
12.617 8713.87 2313.76 0.26552 75.2221 1182930.5445 112.965 3833.5 27 36.7303
2.003 8167.27 2365.4 0.28961 98.9481 1155619.73 111.677 3546.78 98 35.3102
15.814 7473.23 2588.44 0.34636 83.8908 1017221.9692 120.438 3272.96 85 36.6929
0 10631.9 4045.81 0.38053 105.002 1507881.2622 138.484 3799.71 53 34.4907
1.525 10038.7 2649.25 0.2639 103.231 1432518.5718 149.271 3960.85 40 33.1908
20.269 11041.1 3760.83 0.34062 96.285 1575515.3114 155.651 4241.03 96 32.5206
1.505 7000.32 1462.79 0.20896 54.0368 966115.7055 90.4509 2906.55 27 40.1448
17.784 11456.6 4735.48 0.41334 102.637 1616338.7147 152.732 4204.43 47 36.044
1.103 7338.46 2878.88 0.3923 63.8447 1071102.7571 97.6804 3210.96 29 34.3601
3.524 21122.9 6650.64 0.31485 252.853 2945856.4325 334.731 5526.22 77 23.3412
3.285 23518.1 7223.62 0.30715 317.717 3267366.5588 367.835 6664.53 85 17.6912
11.711 7228.75 2087.32 0.28875 55.3355 1023432.6545 102.698 3776.74 27 38.4138
16.47 7894.18 3183.97 0.40333 90.2572 1127999.6543 116.632 3431.91 25 37.0159
2.568 11342.3 2520.49 0.22222 149.544 1611321.3709 160.815 4693.44 27 29.1653
17.248 8651.07 2284.87 0.26411 73.8185 1187447.3543 100.667 3734.34 86 33.0129
16.401 7735.75 2683.65 0.34691 85.7999 1088146.9675 140.235 3851.92 89 35.3505
16.138 10385.8 2656.57 0.25578 103.13 1506852.4718 141.352 4356.28 138 31.3735
3.405 11176.4 3714.2 0.33232 112.929 1578380.0171 173.929 4458.18 81 33.9518
20.45 18066.1 6933.49 0.38378 209.997 2366112.9571 285.969 5459.81 202 22.6157
3.746 3482.95 1538.41 0.44169 11.5339 472175.5115 47.8159 1465.8 32 45.1828
1.881 6608.25 2334.14 0.35321 76.2705 896717.9229 95.8155 3200.13 60 38.4385
18.596 6854.48 1066.98 0.15566 73.3778 932232.5524 87.1999 3226.19 39 38.4396
18.977 12661.2 5015.52 0.39613 126.053 1743657.8575 202.401 5912.04 152 24.7828
16.395 7721.77 2782.42 0.36033 93.0932 1064942.3339 128.848 3840.03 86 35.5107
6.668 7526.69 2314.46 0.3075 59.7238 1029325.9379 104.946 3367.88 37 37.3283
0.846 9020.46 2124.75 0.23554 99.1787 1274960.7938 143.872 3544.01 13 34.5269
2.772 12081.3 3220.25 0.26654 160.384 1708789.1194 195.031 4799.45 64 28.5711
11.656 12519.6 3993.95 0.31901 125.385 1690023.0299 171.524 4228.5 10 31.1026
1.319 7896.81 1955.23 0.24759 93.9979 1071385.8068 125.503 3392.47 9 37.4078
3.797 12393.2 3735.4 0.3014 161.391 1745244.3461 208.193 4800.62 71 28.9424
8.153 9093.67 2660.46 0.29256 75.4685 1284952.1231 115.097 4081.86 23 34.2681
15.454 6205.76 1985.22 0.31989 54.0296 819663.2425 114.014 3778.29 21 40.5263
11.053 7716.89 2704.04 0.3504 71.4763 1089079.7537 97.9233 3733.66 11 36.3134
2.077 10778.9 3499.97 0.3247 130.535 1444472.449 160.62 4094.18 56 31.301
6.533 16973.4 5260.48 0.30992 227.319 2345550.7334 291.265 4826.29 130 27.0934
11.362 4778.28 1147.01 0.24004 39.7965 660378.0637 55.7454 2434.32 47 41.314
6.388 16450.4 6423.95 0.3905 179.204 2312139.1745 282.327 6017.43 199 27.1569
3.049 9910.34 2148.28 0.21677 92.421 1392083.5015 125.465 3598.58 131 35.9545
15.313 9708.33 4398.74 0.45308 88.2999 1396044.7836 145.432 3979.21 49 34.6952
3.307 12297.6 3109.86 0.25288 137.44 1673712.3252 150.44 4077.69 220 31.9153
15.677 6554.2 2401.33 0.36638 50.6623 929189.4344 79.4891 3298.05 26 37.9849
15.55 8386.99 1754.3 0.20916 80.5588 1198995.0482 116.691 3782.29 67 37.002
5.122 17530.4 5335.43 0.30435 151.662 2377824.323 311.995 4662.96 190 28.1706
3.058 12034 3072.99 0.25535 126.743 1626426.65 157.837 4080.6 223 31.988
1.392 21015.5 5631.87 0.26798 291.232 2846767.7506 315.843 6556.03 287 18.6064
1.058 7824.1 1725.93 0.22059 76.1947 1120635.2021 110.75 4035.67 106 34.9557
13.147 8890.54 2916.48 0.32804 88.2355 1255830.7758 126.361 3994.39 46 35.6627
7.12 9132.5 2794.03 0.30594 81.0636 1293877.7886 131.312 4317.93 88 33.0563
12.916 5035.11 1340.74 0.26627 37.0881 682721.6162 79.0474 2426.17 27 41.3206
2.885 5802.92 2215.17 0.38173 33.2891 823202.0521 79.5626 2589.32 39 42.7567
1.549 8768.79 2176.67 0.24822 100.319 1227858.2565 136.133 3999 170 33.2508
14.483 6831.59 2406.18 0.35221 63.2411 979654.0479 88.1841 3529.34 75 37.9693
2.184 13296.7 3302.62 0.24837 167.331 1875766.6494 216.147 5040.71 196 27.5696
4.208 11013.7 3032.22 0.27531 100.836 1509975.5207 153.13 4293.43 36 33.4413
0.569 8107.95 1834.7 0.22628 94.9847 1131251.9175 119.05 3196.75 5 37.0149
1.297 8830.42 2172.97 0.24607 93.314 1243403.7671 134.86 4059.31 169 33.8622
1.952 8632.42 2287.93 0.26503 89.078 1212448.6853 110.648 4164.32 51 34.9047
1.095 11262.8 2391.95 0.21237 147.465 1587728.7702 186.267 4641.8 45 29.714
2.299 5800.95 1546.69 0.26662 47.2794 816807.0438 71.9864 2913.9 13 40.8108
2.236 4911.5 1487.09 0.30277 45.0991 678333.5184 60.7722 1884.09 15 43.66
1.097 23121.1 6148.23 0.26591 342.271 3155909.3177 412.271 6241.1 141 19.7339
3.141 7851.57 2433.71 0.30996 75.0647 1064820.4895 106.005 2958.13 115 38.4198
19.682 13785.5 3854.17 0.27958 129.57 1956506.0039 172.154 4916.53 118 28.6837
1.954 5960.39 1884.69 0.3162 61.0855 825272.1537 84.7754 2687.61 42 39.8104
10.83 7014.39 2047.46 0.29189 55.767 1006669.9271 95.4975 2456.82 92 41.6828
8.09 5316.32 1667.03 0.31356 54.4837 732158.9941 74.1227 3014.04 18 40.1792
2.749 9560.11 3424.88 0.35824 106.317 1333858.3705 129.672 3743.42 8 34.8089
2.633 11464.5 4033.23 0.3518 135.26 1522176.2925 182.187 4181.5 45 33.9762
12.907 9328.13 3306.44 0.35445 102.736 1340994.0272 137.293 3414.12 40 33.1477
1.914 13525.7 4060.12 0.30017 172.499 1863761.5656 183.029 4929.77 201 26.9795
15.03 7892.17 2191.45 0.27767 67.0635 1129491.0817 94.7024 3034.25 61 39.0899
1.389 9236.34 1912.15 0.20702 96.8868 1287403.9511 136.759 3658.76 19 34.0435
3.161 2864.76 903.69 0.31545 22.2613 387853.4025 31.9704 1333.81 4 44.5522
1.48 4214.34 1305.55 0.30978 34.0921 581846.4046 50.2325 1404.75 17 44.2624
5.944 13455.1 4794.54 0.35633 86.1662 1921644.4709 199.523 4539.93 97 31.1392
11.982 9760.76 2735.65 0.28027 83.7407 1384452.0345 119.822 4167.12 73 33.254
1.63 5420.76 1237.7 0.22832 50.7799 782928.4962 71.3267 2871.9 58 40.2484
14.19 7576.59 1818.44 0.24 63.7178 993463.9279 92.1581 3341.01 53 39.7612
14.725 6128.55 2243.5 0.36607 76.7677 845396.457 96.5448 3115.97 33 34.79
19.067 12903.2 2594.55 0.20107 131.433 1744597.1696 178.23 4468.9 125 30.9732
1.969 6981.62 2510.99 0.35965 76.1669 964334.7311 94.6676 3253.78 55 39.2075
18.618 9188.85 3677.8 0.40024 63.0746 1263716.2678 125.282 3324.66 41 35.5389
17.943 18489.2 5202.07 0.28135 182.543 2613281.0617 222.299 5694.46 56 22.9168
3.237 8870.19 2174.14 0.2451 96.5594 1251988.7172 115.748 3831.35 56 33.4813
2.333 9072.91 2775.5 0.30591 95.0773 1292606.9878 122.207 3619.55 89 36.4403
17.809 11001.7 3051.29 0.27734 92.529 1514809.3077 136.249 3993.76 179 33.5635
12.203 7593.52 2592.49 0.3414 62.5705 1065839.8659 116.269 4594 65 37.1957
2.338 9248.32 2666.55 0.28832 86.3464 1307058.7635 137.386 3872.38 1 35.1532
13.071 6137.38 2691.78 0.43858 55.8439 874814.1583 87.0557 2611.84 31 40.8737
15.076 7708.32 2775.02 0.36 79.1392 1057535.6276 117.859 3370.44 20 37.2617
2.025 15609 5786.99 0.37074 185.8 2178277.3114 256.926 4380.27 34 27.9222
9.58 5564.42 1502.84 0.27008 53.9745 704533.9136 91.8311 2714.24 5 40.7729
2.404 7479.63 1774.61 0.23725 71.1684 1007345.8147 101.892 3408.69 84 36.827
16.404 7217.24 1811.29 0.25096 63.6545 984067.4444 87.6754 2997.61 44 38.8332
2.015 21821 6306.74 0.28902 293.907 2995062.0077 315.237 6639.94 291 18.6717
1.945 6867.25 1468.27 0.2138 68.7427 950795.743 92.051 3388.21 18 38.0642
18.728 11977.7 4903.67 0.40939 176.334 1644622.033 232.6 5190.56 203 26.4155
13.317 9424.75 3313.69 0.35159 78.2068 1262800.7146 130.49 3321.98 105 34.0763
15.402 8487.31 2862.31 0.33724 64.5625 1187818.8597 118.147 3185.95 48 34.138
3.697 15587.5 3547.59 0.22759 172.712 2204536.4499 229.307 4921.37 76 27.063
10.061 6021.12 2087.21 0.34664 55.9603 836865.7235 86.3315 2684.75 35 40.6671
17.206 9263.23 3923.39 0.42354 97.3613 1335130.1293 153.619 3236.79 62 33.692
1.94 7123.29 2076.49 0.2915 67.4393 1002250.9187 92.2477 3622.17 32 37.9278
14.303 12638.9 3318.03 0.26252 128.869 1717152.8552 172.107 3895.95 36 33.9353
1.443 15311.2 4959.78 0.32393 156.666 2103345.2476 236.51 5541.54 184 46.5464
2.379 9625.85 3281.74 0.34092 99.0344 1345885.8233 141.334 3635.94 14 35.3587
4.355 7411.22 3011.74 0.40637 62.8403 1012716.0472 124.465 3524.37 62 38.0549
2.626 12392.3 3409.53 0.27513 155.739 1728184.7211 201.541 4804.17 56 28.5824
20.497 8307.23 2443.28 0.29411 93.8322 1139367.765 100.326 3477.09 33 31.9015
8.879 6592.79 1390.15 0.21085 58.484 905147.041 81.0378 3323.1 49 37.8556
16.554 8373.55 3073.33 0.36702 62.3687 1180256.6069 124.381 3358.09 33 37.0129
5.195 7351.92 2972.29 0.40428 62.9882 1033599.3711 105.24 3892.81 72 37.5156
5.996 10125.9 3777.41 0.37304 90.7088 1435002.8798 144.738 3713.28 5 36.5577
20.757 13212.1 4679.17 0.35415 148.536 1855876.8927 210.435 3962.48 132 32.5938
5.283 5899.34 1994.99 0.33817 56.3195 819538.9823 79.4627 2545.66 33 41.5691
18.699 9246.6 3081.45 0.33325 68.7846 1289456.8544 127.062 3543.18 91 36.5308
18.358 10239.4 3385.56 0.33064 69.4179 1433128.8685 151.664 3924.94 11 30.4265
3.328 7339.34 2134.4 0.29081 81.8784 1027124.3796 89.1143 3470.95 81 37.2669
1.47 14094.6 4468.91 0.31706 158.941 1938312.8467 208.693 5262.89 203 26.6816
17.393 9896.8 3488.25 0.35246 94.0175 1379759.5961 166.762 4471.67 96 32.5117
1.679 10655.5 3194.58 0.2998 129.346 1433912.3377 161.433 4050.38 38 46.5464
16.189 7440.99 2912.41 0.3914 66.1582 1043246.4584 106.682 3553.46 63 36.3494
7.491 9690.04 3739.26 0.38588 67.779 1309023.3776 149.14 4983.4 53 33.6722
7.044 9609.56 3208.94 0.33393 71.7172 1351412.6111 127.805 3774.01 37 36.3047
6.62 4245.74 1008.71 0.23758 30.1362 578476.7978 51.2135 2031.05 48 44.3538
16.448 11491.4 3149.15 0.27404 91.583 1566295.6154 143.885 4296.47 166 31.8821
18.047 14275.5 6376.15 0.44664 140.135 1948667.4137 227.156 5654.12 153 26.4409
15.608 7868.25 3089.91 0.3927 92.8478 1110663.6456 122.296 3132.18 32 38.2963
1.659 4373.99 1455.43 0.33274 35.0472 601598.0964 54.6292 1441.43 19 44.2955
1.623 6588.35 1839.05 0.27913 68.4334 862782.9519 105.246 3457.14 74 37.0154
9.336 6160.55 1545.64 0.25089 61.0127 806994.8446 79.4237 2960.62 46 39.5373
17.507 11468.5 4623.85 0.40317 105.299 1569446.7253 215.21 3610.08 18 34.6667
5.122 7945.61 1767.5 0.22244 61.6723 1121938.3289 92.062 2966.22 32 38.6123
1.278 15288.3 4002.76 0.26181 182.573 2167009.7597 210.62 5694.35 68 23.026
13.343 9278.39 3467.7 0.37373 85.672 1267130.2686 155.506 4169.49 19 33.5887
3.426 15980 4187.88 0.26207 214.335 2215390.3446 252.396 5176.62 160 24.5515
14.531 14923.6 5771.15 0.38671 185.539 2028019.7593 250.58 5857.48 136 27.1764
1.511 4207.17 1230.31 0.29243 36.0046 579932.8851 52.7687 1394.75 17 44.338
4.414 15439.6 3809.19 0.24671 245.197 2104556.3949 261.674 4769.76 298 27.649
1.901 9780.49 2113.8 0.21612 112.578 1350607.4602 133.073 4223.76 51 34.1324
16.781 7547.87 2266.03 0.30022 71.9001 1054866.5742 104.401 3250.5 96 38.4202
1.301 16961 4066.43 0.23975 207.836 2386957.4512 277.174 5673.23 87 23.0619
7.315 7284.18 1649.62 0.22646 59.6545 1015383.6131 74.1842 3201.75 23 39.9385
0.765 7788.55 2132.01 0.27373 88.1869 1066336.1096 112.087 3108.95 20 37.6819
19.376 4008.76 1054.22 0.26297 32.0048 569038.7137 44.5132 1233.79 43 42.7375
0.772 12645.8 2718.4 0.21496 161.073 1718919.8871 193.144 4938.35 141 29.6687
12.685 5994.59 1652.65 0.27569 61.8569 866940.7865 83.8956 3368.27 52 40.209
8.428 12966.1 4335.88 0.3344 153.171 1794138.7977 218.038 3844.05 89 38.0861
14.547 12482.6 5506.19 0.4411 170.278 1757119.63 245.185 4698.34 132 29.1242
12.439 8440.41 2874.08 0.34051 76.737 1185376.6258 134.92 3293.39 100 37.6562
11.162 4527.01 1554.85 0.34346 35.756 630187.13 67.1488 1889.37 15 43.6609
8.943 6659.96 2145.86 0.3222 71.6066 922892.8936 87.2427 3100.18 51 39.3685
16.16 18616.2 7285 0.39132 197.392 2590490.2279 313.191 5907.22 185 22.9134
2.587 5539.7 1427.27 0.25764 46.9494 772783.7994 69.2798 2949.64 13 40.758
3.205 7540.14 2513.2 0.3333 82.775 1047365.4382 96.7594 3408.52 51 37.1501
6.001 16593.1 6642.44 0.40031 188.99 2266649.2819 283.527 5431.75 200 26.1485
4.985 9518.91 2514.2 0.26412 92.4864 1320448.5871 136.605 4075.51 39 34.5103
0.558 9315.18 2320.4 0.24909 110.305 1314060.4467 156.775 3823.79 11 34.1775
1.841 12773.5 3555.67 0.27836 159.973 1818214.5019 175.964 4743.82 32 28.974
15.575 7573.46 2394.5 0.31616 69.598 1019863.9647 101.857 3459.36 83 36.4327
10.438 5246.32 1762.7 0.33598 40.7484 711664.9748 79.0339 1660.47 16 43.4446
2.978 13971.4 4738.49 0.33915 155.852 1929346.2614 199.549 5180.77 65 26.4467
3.928 14157.2 4842.67 0.34206 161.261 2011370.4206 232.627 4515.3 64 29.4748
2.373 9273.15 2661.12 0.28697 100.068 1281123.6177 123.298 3918.88 20 35.2874
11.268 5164.17 1899.59 0.36784 62.5134 676995.861 87.5302 3041.64 36 39.6734
3.172 8819.04 2702.28 0.30641 91.7411 1237202.2654 136.052 3712.56 23 35.7875
19.991 8320.59 2870.42 0.34497 55.2579 1139475.5329 116.639 4396.68 42 34.2277
6.414 7484.75 1586.72 0.21199 73.2904 1036559.098 90.1022 3755.75 33 37.0527
3.323 14445.7 4817.42 0.33348 154.09 1979721.9321 222.871 4734.49 29 28.9308
9.217 8817.65 2130.12 0.24157 65.8262 1291512.5458 94.1654 3037.18 36 38.9395
4.229 6045.62 2037.35 0.33699 56.3562 868840.9445 81.4276 2532.5 59 41.7512
12.335 8064.87 2064.76 0.25601 75.2262 1111045.8945 102.636 3172.52 6 37.6063
20.227 12094.3 3567.88 0.295 154.651 1692399.2652 199.243 4603.33 130 29.8699
2.253 10772.7 2579.52 0.23944 121.699 1459951.5743 156.318 3635.18 15 34.548
8.062 7129.41 1510.25 0.21183 64.1024 951295.4608 84.3991 3594.13 12 34.104
15.198 9383.65 3134.99 0.33409 72.9467 1284715.5682 111.142 4310.77 50 33.7239
14.08 7118.53 3239.37 0.45506 50.1347 984694.3126 118.316 2559.18 15 40.158
20.456 12256.1 4719.09 0.38504 112.227 1674015.8733 165.995 5788.2 64 29.4828
4.241 6547.33 2733.88 0.41755 38.9556 869124.1435 121.897 3926.29 47 39.3866
1.886 11208.2 2375.96 0.21198 142.161 1547273.6181 184.89 4146.49 57 31.9176
14.149 7250.05 1874.85 0.25859 76.152 1006679.1217 87.0003 3157.69 34 33.1673
2.424 11920.2 3100.75 0.26012 172.942 1691589.9514 184.961 4628.7 104 29.6985
16.54 8481.57 2118.76 0.2498 82.8607 1146208.4648 114.72 3610.55 19 36.0936
3.612 11385.6 3477.49 0.30542 108.039 1569576.555 161.614 4580.87 21 32.3492
16.399 6681.31 2304.47 0.34491 37.1094 915056.2773 99.3545 2907.74 31 41.9221
5.395 15692.2 4256.42 0.27124 200.301 2137448.2005 246.197 5132.7 86 26.1474
3.242 10211.7 3423.29 0.33523 107.64 1453838.9453 149.713 3857.71 67 34.8231
18.727 8752.83 3076.23 0.35145 59.8315 1176306.4142 135.646 4639.7 37 34.0398
2.848 7606.11 3179.29 0.41799 77.7825 1076513.5482 115.638 3306.07 44 37.743
11.964 7255.99 2865.31 0.39488 52.4702 1014770.9435 106.265 2847.62 60 39.5995
1.515 7051.79 1907.9 0.27055 87.604 963011.0636 120.07 3160.49 132 36.3713
19.639 10220.5 3938.25 0.38532 80.589 1442034.177 150.51 4297.32 57 30.4333
19.432 12259.4 3801.33 0.31007 115.4 1795041.4997 176.306 3705.06 125 35.6623
11.137 11584.8 4144.66 0.35776 94.3082 1629407.6704 167.11 4748.76 92 33.2782
4.922 13700.9 5086.7 0.37126 132.44 1792844.7035 208.593 4531.22 68 33.769
15.831 7605.29 2178.1 0.28639 93.923 1025537.397 141.485 3827.5 77 28.0543
3.648 11836.5 3346.48 0.28272 138.37 1652271.5264 165.459 4567.3 63 30.3452
3.561 5132.85 1169.19 0.22778 45.9074 719178.6729 63.7628 2680.48 12 41.8229
2.08 12230.9 3319.2 0.27137 146.246 1762455.8614 168.571 4670.14 26 29.0425
18.855 11244.9 4256.59 0.37853 92.8925 1522220.1501 154.757 4812.17 54 37.0146
3.119 18756.3 5281.36 0.28157 253.146 2521553.9318 314.206 5655.1 314 21.7917
5.259 10553 3184.68 0.30177 102.184 1473822.4168 154.449 4598.46 45 35.6587
7.069 7475.72 2190.16 0.29296 59.9712 1023488.4077 106.645 4221.65 36 35.9075
19.265 11690 3646.16 0.3119 115.766 1691112.1843 148.386 4918.71 103 29.1625
10.133 6921.5 2250.92 0.3252 55.1125 942829.591 92.6792 2777.92 31 40.7332
19.342 20623.7 7277.53 0.35287 208.459 2947599.9687 317.471 6517.17 206 23.6285
2.476 14737.3 4159.32 0.28223 178.08 2074218.3225 236.781 4585.41 29 29.5685
1.737 10775 2283.41 0.21191 122.521 1468920.8831 173.61 3911.27 74 33.156
2.426 5173.29 1122.38 0.21695 43.7239 708007.9096 74.3836 2830.72 15 42.5057
2.553 15929.5 5564.55 0.34932 238.704 2177652.2812 258.305 5533.36 119 23.3127
18.186 10202.3 4017.61 0.39379 70.3134 1403990.4945 153.87 3924.51 60 34.3918
8.974 7176.05 2594.41 0.36153 64.8953 1024557.3634 101.274 3991.77 58 39.4764
8.018 5294.86 1965.75 0.37125 46.1114 757474.1714 72.6084 2007.73 5 42.4235
3.635 15343.5 5020.63 0.32721 184.988 2165862.9071 271.683 5152.25 102 26.7932
4.864 5223.08 1828.39 0.35005 49.675 732224.7431 70.278 2141.49 28 42.9391
1.944 9634.96 3214.28 0.3336 91.5231 1311239.7103 140.565 3883.49 35 34.7164
8.833 15424.7 6052.67 0.3924 73.7125 2163617.3446 247.386 13577.1 63 32.3571
6.968 17573.8 6107.49 0.34753 182.987 2448413.7764 264.336 4965.38 39 23.8445
3.57 17553.8 5194.81 0.29593 250.955 2369764.004 294.69 5784.93 329 21.7681
15.324 10816.8 4838.11 0.44727 167.195 1450969.9548 225.956 4580.49 51 31.0091
11.248 14177.8 3439.03 0.24256 211.913 1903747.0613 203.665 5046.56 115 27.0453
16.298 8148.37 2654.33 0.32574 64.4371 1144550.0312 109.464 3637.25 13 37.4067
4.399 13395.9 4938.96 0.36869 100.597 1828874.7545 193.923 4729.68 143 29.0071
10.812 6597.18 1973.9 0.2992 60.4602 935101.6848 86.4215 3509.56 84 36.8664
17.463 7134.84 2205.31 0.30909 63.9232 1023385.1148 95.1884 3064.91 55 38.3045
14.614 7232.48 2063.21 0.28527 65.0904 1009699.1977 93.667 2868.52 78 39.4373
3.246 9979.04 3107.74 0.31142 122.08 1354984.3785 181.867 3798.25 27 31.5449
2.616 5840.35 1373.76 0.23521 61.552 728689.6683 84.676 3088.54 30 39.5024
11.078 8158.03 2790.24 0.34202 68.8683 1076199.4487 112.513 4418.66 56 33.5003
0.61 8743.71 2245.11 0.25676 100.348 1227430.4218 126.524 3233 4 37.0581
2.027 15990.8 5559.46 0.34766 187.614 2205052.2529 260.896 4583.81 33 25.7478
2.322 6930.27 2279.88 0.32897 64.7813 937397.8425 99.2768 3130.43 28 40.3284
4.499 6782.57 1823.49 0.26884 67.2538 950586.4802 82.993 2794.38 51 39.7716
15.765 9871.42 2768.37 0.28044 96.7039 1398243.3435 116.089 3700.61 49 34.8643
1.441 8354.95 1760.53 0.21071 104.191 1151596.4507 134.996 3669.81 20 34.0238
1.381 9166.64 2058.81 0.22459 88.4495 1300432.8523 136.193 4037.61 170 32.7748
2.641 18946.4 5826.55 0.30752 253.105 2586238.1632 326.598 5745.43 331 21.4387
2.318 16359.9 4965.47 0.30351 200.735 2152670.584 260.267 5847.86 241 22.5137
0.686 7872.78 1988.9 0.25262 84.7958 1104941.713 129.561 3130.86 6 37.5083
17.236 6805.82 2094.56 0.30776 55.6844 888874.2403 90.9387 3152.83 49 39.6852
3.045 7281.07 2764.88 0.37973 62.765 996338.8852 130.591 4258.73 83 34.5311
2.376 10331.1 2966.25 0.28711 117.992 1423700.7718 147.949 4174.08 129 32.7797
12.748 4727.39 806.84 0.17067 44.8019 629621.5065 65.6135 2346.72 72 37.2246
5.241 11429.2 4195.99 0.36712 147.529 1598557.0073 177.92 4804.48 44 27.007
14.693 10168.3 3825.67 0.37623 84.7104 1431211.339 143.937 3622.12 72 34.82
1.508 7627.27 2019.87 0.26482 97.8305 1043602.7927 121.784 3343.66 124 36.2867
6.934 7670.47 2340.52 0.30513 80.5905 1100405.1146 105.903 3414.55 60 34.0486
2.204 10571.3 2341.09 0.22145 125.45 1436461.4761 151.592 3643.54 22 34.7147
10.719 14972.5 5852.99 0.39091 78.8759 2037230.286 225.128 4404.84 136 31.7066
1.364 7924.29 1369.51 0.17282 76.8397 1129503.8999 90.2072 3680.59 21 34.9091
1.699 11916.1 3513.86 0.29488 156.021 1668559.6194 225.588 4207.17 81 31.1866
2.27 7186.97 2425.62 0.3375 62.6561 961168.7827 102.74 3175.91 43 40.1712
13.735 7767.74 2215.18 0.28517 52.2416 1050549.046 98.8447 3838.87 26 36.5181
1.743 14586.1 4713.98 0.32318 163.021 2018253.6561 220.729 5273.34 203 26.8705
3.43 9003.47 2338.95 0.25978 114.784 1209326.6383 141.2 4019.92 48 34.4564
13.425 5779.07 1373.46 0.23766 52.4616 763906.0801 85.0136 3458.99 26 40.8415
2.013 9502.16 2432.5 0.25599 119.58 1292945.4451 134.406 4152.78 135 33.1118
1.359 14186 2727.54 0.19226 179.766 1972056.1684 222.081 4682.49 24 28.6372
2.184 9777.39 2452.84 0.25086 83.54 1374274.8534 119.027 4733.67 25 32.769
6.329 15558.4 4575.03 0.29405 179.277 2134236.572 271.376 5262.29 85 25.2057
20.139 16172 5265.7 0.3256 153.472 2309301.689 239.162 6187.88 120 22.9029
13.276 7607.48 2394.3 0.31472 68.1249 1034674.2615 115.687 4098.06 88 34.4414
3.312 7694 2368.02 0.30777 74.745 1025025.182 100.332 3397.17 83 37.3933
2.597 15111.2 4989.57 0.33019 182.875 2104006.3352 244.815 5398.01 164 24.3632
15.17 8905.13 2646.69 0.2972 95.3467 1248473.2127 123.432 4113.4 108 31.9376
8.564 5985.2 1438.35 0.24031 64.2238 828038.2876 82.4529 2801.73 82 39.775
1.88 11620.2 3190.25 0.27454 138.416 1605235.8308 165.417 4469.51 87 31.4664
3.593 14338.5 4186.3 0.29196 161.983 2063445.9773 230.786 4715.79 52 28.5402
0.491 8083.47 2043.84 0.25284 91.4486 1126324.2677 124.54 3230.27 4 36.9414
18.541 14333.2 5682.81 0.39647 135.576 1962576.1733 211.994 4007.67 76 33.4622
12.26 5853.15 1121.66 0.19163 54.0807 787121.7001 75.9177 2504.75 30 40.8579
3.229 12779.3 3263.36 0.25536 128.798 1724208.9696 167.638 4147.36 222 31.6289
2.546 11366.2 2837.83 0.24967 120.56 1539534.0682 177.688 4158.46 94 31.7802
13.408 7500.34 1881.18 0.25081 53.0393 1052895.2522 84.7827 3434.71 18 38.7305
17.322 9748.6 3404.22 0.3492 67.1646 1423391.6669 121.482 3105.75 62 37.7114
18.271 7925.25 2560.88 0.32312 82.2718 1118771.2176 114.385 3359.5 134 37.1419
1.024 9462.75 1864.42 0.19702 106.215 1335529.7635 131.627 4231.13 51 33.8197
1.645 9201.06 2698.12 0.29324 87.2475 1298189.3707 118.453 4026.67 46 36.2728
3.277 4850 1168.4 0.2409 45.1742 681547.3117 66.23 2670.15 23 42.0546
1.75 10441.8 3022.71 0.28948 125.849 1470628.6344 179.975 4253.88 65 32.428
3.49 9974.19 2710.73 0.27177 111.222 1378754.7646 154.146 4270.65 73 29.394
11.856 6137.39 1345.96 0.2193 60.0429 874193.4845 71.6644 3493.82 52 39.1931
1.879 16152 5460.29 0.33805 234.085 2217425.8402 266.735 5301.6 128 23.0217
14.226 8515.28 2640.61 0.3101 52.4593 1148043.9325 113.632 4258.61 26 35.201
12.721 9576.48 3372.38 0.35215 100.994 1361279.9479 134.256 3610.84 47 32.3144
3.625 7923.42 2477.36 0.31266 82.0499 1057424.932 133.23 3622.14 28 35.6184
13.158 8007.28 2565.24 0.32036 75.09 1101076.5143 103.441 3267.56 103 35.7291
15.674 7033.67 1669.94 0.23742 55.6956 992762.4988 78.7748 3083.16 35 39.4687
17.742 9139.61 2393.44 0.26187 94.59 1239691.4288 118.819 3940.07 136 36.9899
2.2 8334.41 2150.84 0.25806 80.5478 1169196.7977 113.932 3316.81 9 36.5736
5.489 11597 4124.5 0.35565 151.308 1577240.1601 229.508 4861.2 88 28.3259
2.479 6896.55 1993 0.28898 60.9362 904796.3648 91.9152 2716.01 37 38.4169
4.764 14028 3759.23 0.26798 176.861 1912285.4904 251.449 5165.72 89 25.9492
2.317 7166.59 2004.67 0.27972 73.6682 961963.4415 100.387 3488.98 79 37.4103
14.208 4169.53 1424.22 0.34157 81.666 498871.2244 90.4603 1739.93 68 43.7338
16.973 10630.2 5011.05 0.47139 91.5475 1470848.8938 166.621 3931.51 57 31.9243
9.168 5093 1423.18 0.27943 71.9273 707688.802 72.3819 3054.87 50 39.2345
1.352 9780.45 3142.77 0.32133 97.0282 1359593.9929 147.875 4406.46 34 33.6988
16.704 16085.7 5845.34 0.36338 125.104 2211851.3429 287.305 5152.38 164 26.7724
11.827 8071.73 1903.44 0.23581 70.9674 1087672.9056 103.088 3911.27 92 35.8665
11.595 7325.1 1925.48 0.26286 73.546 1027140.0365 90.0962 3138.06 29 36.7144
19.526 25595.7 11296.9 0.44135 200.342 3456737.5635 398.357 6408.78 112 28.7747
2.101 8809.25 1870.59 0.21234 107.507 1196099.2564 136.129 4005.15 43 34.1638
15.671 14024.6 3608.29 0.25728 142.528 1940037.8607 186.274 4509.78 44 29.5648
4.54 6766.42 1538.41 0.22735 54.8097 902220.606 79.1612 3301.45 32 38.664
4.819 9550.36 2617.94 0.27411 88.4349 1362533.9008 132.866 4888.44 34 32.4787
15.292 8489.92 3835.65 0.45178 97.2065 1210853.7425 134.945 3180.51 67 36.725
4.125 15095.2 5141.7 0.34061 189.749 2160371.7543 263.004 4980.93 89 26.4159
19.311 14917.6 4703.39 0.31529 159.268 2062595.7154 210.28 5115.17 112 27.495
12.659 8291.36 2267.76 0.2735 74.8865 1118167.4431 102.835 3448.34 32 35.0082
17.419 11989.7 4016.86 0.33502 111.678 1721875.7852 177.024 3764.47 161 35.9574
1.357 8895.55 2323.49 0.26119 93.0526 1255893.2129 130.605 4075.2 163 33.3296
1.838 7381.74 2393.79 0.32428 77.509 1017299.3677 101.167 3750.82 39 36.1937
16.262 11378.6 5432.01 0.47738 57.0612 1457658.6479 205.176 4201.5 77 33.6716
3.429 6411.31 2061.5 0.32154 44.7148 831886.2766 90.1626 3011.5 55 38.9741
17.748 9595.15 3263.83 0.34015 92.0761 1346099.5274 129.556 3645.44 86 35.6323
15.954 6947.14 1872.96 0.2696 59.5051 951654.4934 84.6461 2928.54 31 40.3462
2.012 8946.09 2036.96 0.22769 105.372 1214380.3171 142.648 4021 37 34.0734
15.253 8989.5 3268.14 0.36355 96.5912 1266695.0621 152.599 4035.28 77 32.6275
19.156 10877.2 3040.05 0.27948 99.7481 1511584.9976 176.624 3469.98 109 37.0481
11.733 8055.03 2474.6 0.30721 73.513 1127919.9186 99.8246 3195.93 57 37.6847
18.925 6427.08 1381.63 0.21497 55.6163 844282.0149 70.226 3212.11 47 38.8156
1.443 6806.16 2326.26 0.34178 64.6847 915127.2417 97.2523 3111.94 19 40.247
1.942 7964.25 1522.97 0.19122 78.9799 1113451.2171 104.143 3766.3 12 34.0182
11.158 5637.36 2585.5 0.45863 59.4516 779305.9737 95.3751 2209 62 41.1601
1.19 7735.11 2261.15 0.29232 74.3341 1057483.4814 123.556 3096.72 81 39.0408
3.785 6272.7 2188.47 0.34888 57.5937 862327.7638 87.0864 3230.37 14 39.3036
4.562 14599.1 3378.1 0.23139 176.331 2073755.2701 219.722 4820.65 83 27.6684
7.067 6272.36 1571.96 0.25061 70.0847 893420.7086 71.0596 2856.13 71 39.6602
1.618 7233.29 1966.95 0.27193 96.4003 1009134.0515 104.764 3912.69 21 35.8825
2.131 9095.18 2115.52 0.23259 105.843 1256109.7328 143.989 3974.5 40 32.45
1.706 14788.7 4124.31 0.27888 156.377 2075925.7738 184.745 5111.51 31 46.5464
4.424 8176.91 2852.48 0.34884 91.4607 1136004.1268 121.862 3445.43 86 36.6733
1.307 8345.76 1538.31 0.18432 76.7026 1191677.389 99.9 3831.9 9 35.3314
4.304 11736.1 4069.22 0.34672 116.662 1644881.6341 177.618 4538.46 79 31.8622
16.335 8039.41 3768.37 0.46873 88.9949 1005822.7805 143.397 2245.08 117 40.6335
14.666 9585.54 2601.93 0.27144 62.9965 1364258.9834 114.11 3587.01 41 39.3554
18.002 5694.5 1841.75 0.32342 36.9255 787251.1731 79.7432 2240.22 14 42.2148
7.1 10361.1 3440.45 0.33205 108.101 1453445.5006 157.322 3802.2 26 30.5743
2.62 8377.2 2221.58 0.26519 83.2141 1184715.4202 112.266 4037.34 41 34.8647
19.74 12059.6 3641.12 0.30192 125.252 1717775.0057 190.26 4988.86 128 28.059
11.421 7402.81 1373.04 0.18547 68.0922 966484.0253 84.3093 3204.88 17 38.9323
14.401 9604.56 3895.04 0.40554 72.0878 1360302.305 141.267 4034.38 39 38.1124
3.681 7164.88 2137.9 0.29838 60.9231 979176.0601 85.3591 3325.65 34 38.3819
2.184 13089.4 3629.54 0.27728 170.076 1821131.9171 205.102 5018.48 59 28.4365
0.886 11140.3 2480.24 0.22263 144.942 1573884.0913 181.49 4540.49 51 30.4558
16.834 9038.25 3615.77 0.40005 92.3667 1275453.922 117.216 3746.7 29 34.2648
5.034 8282.4 2081.48 0.25131 84.2257 1139909.3914 121.1 3563.9 51 36.0694
14.545 5213.09 1561.2 0.29947 33.9616 722683.2345 71.1422 2053.57 17 42.1693
19.047 13937.3 5069.34 0.36372 142.141 1880518.1507 233.181 4984.23 98 26.8077
19.671 17859.1 5130.11 0.28725 169.464 2612208.4085 256.48 5463.81 83 26.4097
18.73 11425 4498.22 0.39371 98.9811 1534197.566 184.042 4080.8 60 32.6682
2.804 8417.63 1777.29 0.21113 86.2654 1191189.7341 105.69 4673.98 55 33.1941
19.321 9071.08 2034.47 0.22428 99.6851 1281445.6658 125.744 3842.14 41 27.94
11.808 8136.96 2359.37 0.28995 87.7108 1116842.4647 94.4821 3783.17 24 34.7938
2.321 9729.21 2703.09 0.27783 119.438 1334309.0949 144.017 4169.26 128 30.2586
4.356 8706.45 3209.85 0.36867 65.0067 1151448.2152 135.83 4568.04 88 31.9196
2.268 8962.12 2555.04 0.28509 87.9382 1261091.8578 133.851 3843.26 8 32.4523
2.059 15075.4 4917.91 0.32622 234.175 2062344.5351 248.594 5359.32 136 24.3212
3.431 18854.9 5466.1 0.2899 277.408 2556859.9488 334.023 6324.17 274 19.4547
7.087 6832.67 1518.3 0.22221 95.185 939346.2733 88.2659 2951.68 29 37.5402
3.803 19579.4 6413.35 0.32755 252.861 2704240.5441 323.764 5460.3 80 23.6738
20.03 14688 5352.25 0.36439 102.719 2065921.8226 214.403 4883.4 81 29.0485
18.223 11633.6 4029.61 0.34637 145.797 1618444.5513 179.581 4159.96 134 28.6713
1.728 9365.17 2611.32 0.27883 101.939 1297271.4921 131.418 3554.99 113 36.7874
19.557 8360.35 2197.06 0.26279 93.1125 1125187.5229 93.2737 3559.55 20 34.2675
14.041 6319.28 1543.08 0.24418 56.9078 892631.5106 85.1252 3139.75 36 38.9839
2.459 8678.54 2917.59 0.33618 91.0112 1167720.0602 132.615 3348.22 77 38.0195
18.505 23149.8 7900.2 0.34126 235.923 3130596.1846 259.615 6593.41 173 21.793
15.391 6963.13 3047.37 0.43764 56.2356 1003958.1522 104.336 2985 62 39.9878
2.342 8595.73 1794.6 0.20877 96.9681 1203936.2662 120.532 3789.25 44 34.6682
8.106 6832.43 1798.26 0.26319 48.7303 927582.4714 92.4828 2630.59 32 40.7344
4.24 5169.41 1693.47 0.32759 51.0105 716729.4336 71.3385 2501.16 28 41.9527
14.321 12360.3 2907.11 0.23519 97.1051 1725563.2524 140.801 4585.12 51 31.3132
7.343 4780.01 1379.33 0.28856 44.648 684538.6304 66.492 2365.98 47 43.1168
17.601 8740.86 3370.39 0.38559 74.0372 1203291.7417 126.287 3670.14 44 37.9889
2.076 7393.36 2025.21 0.27392 74.3264 995187.3621 103.717 3610.46 79 37.3506
6.306 6706.84 1598.33 0.23831 74.7177 915347.117 92.2126 3528.97 37 36.1639
3.33 6951.43 2723.88 0.39184 69.0423 998123.1024 89.1828 4369.75 70 36.4146
11.847 5734.14 1609.15 0.28062 49.8421 795112.9973 80.7215 2343.09 65 40.1592
1.974 4190.36 732.8 0.17487 39.7899 551708.4305 59.51 2560.08 12 43.4944
16.522 8187.65 2850.47 0.34814 65.7399 1083291.8648 110.897 3930.34 67 34.0568
1.787 4547.16 1287.51 0.28314 54.4041 613606.4775 65.3569 3038.38 17 40.4049
3.713 21164.3 7060.92 0.33362 254.789 2961050.5756 330.066 5545.96 94 23.4201
19.962 12691.7 4161.37 0.32788 114.015 1835652.4537 174.471 3788.28 142 35.625
13.885 7523.25 3054.02 0.40594 64.0589 1044334.4474 120.204 3100.18 35 38.5059
0 7606.51 1749.05 0.22994 89.519 1053786.4232 94.1719 3791.7 40 35.9349
4.906 20397.6 5885.52 0.28853 250.76 2784024.9817 310.958 5590.73 207 23.6907
4.55 10183.5 3182.59 0.31252 114.426 1396452.3929 148.743 4452.49 102 34.1382
1.868 6031.43 1545.05 0.25616 53.7281 792259.5659 92.5619 3586.01 19 38.2788
16.55 11582.5 4501.77 0.38866 96.8496 1617226.1981 163.109 4295.88 89 32.4636
11.743 10647.5 4036.17 0.37907 68.6901 1503463.1848 147.651 3627.86 54 37.4108
18.335 8655.27 3524.83 0.40724 67.8896 1231689.0849 118.302 3944.11 72 34.4077
2.441 8352.67 2228.65 0.26681 84.0696 1194491.8351 114.882 3302.66 6 36.0196
17.201 13444.1 4707.4 0.35014 127.446 1916590.2465 169.875 5441.81 142 25.4769
9.659 8717.29 2897.03 0.33233 71.487 1225484.4529 113.622 3464.35 55 37.6805
1.526 13863.6 4499.91 0.32458 164.178 1912439.8953 220.509 5274.41 198 27.0405
1.687 13428 3991.91 0.29728 167.551 1892633.3495 230.849 4375.25 80 29.8621
1.115 6382.96 1329.85 0.20834 55.1449 879425.814 83.7866 2797.64 18 40.3041
2.382 7454.01 2420.94 0.32478 82.1618 1020389.9084 120.909 3075.26 64 39.0721
10.678 4631.48 1826 0.39425 38.4821 646029.0553 59.0647 1457.03 29 44.4325
2.322 8671.29 2360.6 0.27223 85.4218 1225006.3844 128.209 3331.79 5 35.1483
15.244 11187.5 4232.93 0.37836 86.625 1555351.9002 162.023 4917.95 56 31.775
17.024 19743.9 7678.89 0.38892 128.963 2824527.8279 284.274 9561.17 110 30.9777
2.241 4604.97 1350.8 0.29333 47.628 645341.0748 61.5585 1962.86 21 42.657
2.969 11291.3 3498.19 0.30981 120.926 1549577.4927 180.756 4119.51 22 31.6598
2.433 6883.16 2169.43 0.31517 64.5427 949959.2788 98.15 3146.3 49 39.4285
3.039 16732 5312.67 0.31751 209.578 2206653.092 267.988 6381.42 261 21.9698
0.659 9053.83 2439.36 0.26942 101.747 1238010.4109 152.046 4163.99 77 33.1885
3.255 5164.15 1035.25 0.20046 43.7939 723841.609 65.3352 2654.59 15 42.0802
2.373 9639.1 2312.45 0.2399 108.826 1339557.5137 135.22 4223.44 70 33.8805
0.597 7810.43 2179.48 0.27904 85.7421 1078711.3605 111.256 3100.1 21 37.6818
1.694 10492.8 2848.88 0.2715 107.385 1493612.6371 155.88 4028.99 45 33.4115
2.128 14819.2 4786.2 0.32297 168.36 2046586.8667 222.247 5244.13 186 29.381
3.404 20292.3 6238.66 0.30743 258.671 2817770.6847 333.928 5594.51 69 23.3048
3.032 14381.2 4477.32 0.31133 190.577 1912408.9733 237.553 5015.56 188 27.0842
18.273 11751.2 2983.89 0.25392 133.874 1606696.6191 156.299 3985.14 25 33.8806
12.673 7727.93 1856.14 0.24018 77.6018 1030380.2309 105.032 3120.14 62 35.5223
2.666 5010.37 1204.23 0.24034 42.9414 705254.8815 71.1799 2723.07 20 40.606
3.567 7034.89 2368.01 0.3366 65.7704 993778.6911 91.2244 3795.42 81 37.6115
1.074 6227.72 1311.79 0.21063 55.5541 857280.4186 83.2392 2801.38 17 40.3152
3.808 10435.3 2710.98 0.25978 117.728 1459353.0174 151.332 4331.79 53 30.2943
10.484 16960.7 6088.66 0.35898 183.139 2328019.3051 263.925 5482.18 93 26.6415
8.183 6961.36 1958.17 0.28129 59.4235 942780.4279 89.3243 3320.61 57 38.7027
3.092 10996.4 3542.24 0.32212 135.617 1486688.428 170.728 4929.65 70 28.9237
18.306 9473.18 2711.57 0.28623 62.8609 1324353.3882 131.133 3727.23 8 34.6052
1.841 7887.11 1913.55 0.24261 75.607 1102522.0103 102.496 4253.03 44 34.5039
3.198 9200.04 2590.75 0.2816 82.7203 1330056.7961 118.226 4034.06 20 38.0959
16.127 7711.08 2051.88 0.26609 72.0839 1072685.3126 102.485 3587.91 85 36.975
3.337 8545.8 2054.33 0.24039 81.678 1221588.3485 110.51 3832.47 21 34.8139
9.345 10849.9 3288.83 0.30312 109.314 1553318.4232 173.027 3761.62 40 34.2019
3.439 22507.9 7251.31 0.32216 311.42 3131372.8719 374.69 6274.02 98 17.8524
1.656 13860.9 3295.83 0.23777 185.941 1898391.3563 211.486 4574.45 181 28.8487
1.915 9679.76 2203.32 0.22762 112.389 1359266.4203 126.142 4162.11 62 34.202
2.895 12592.9 4497.9 0.35717 163.582 1742767.3075 205.05 4846.78 72 28.35
2.758 15609.3 3921.34 0.25121 214.653 2132184.4711 262.726 5123.51 152 25.1989
0.919 11319.5 2374.86 0.2098 147.599 1597510.5516 169.415 4573.96 57 30.1903
11.163 7576.94 2035.75 0.26867 67.7198 1004028.5078 93.1234 3971.39 12 34.8688
8.401 4747.85 1155.88 0.24345 46.454 646799.5405 71.8516 2665.72 6 42.5337
14.918 7093.6 2191.05 0.30887 84.9452 1009288.098 96.233 3413.46 27 37.1008
12.427 11176.8 3959.53 0.35426 95.3795 1556595.0472 161.385 5319.44 30 32.1713
13.95 8375.93 1847.16 0.22053 62.8718 1196394.0382 91.7444 3271.36 54 39.2103
12.525 3945.83 572.7 0.14514 32.8764 540502.5724 42.9782 1772.31 6 42.7735
4.856 8019.55 2755.33 0.34357 82.3504 1154657.608 122.746 3386.19 25 37.4886
17.211 10762.1 3635.19 0.33777 108.964 1547148.7886 167.216 3562.68 133 36.7009
14.361 8763.02 2866.97 0.32716 64.7335 1218188.5863 128.076 3764.32 12 37.3371
1.407 15098.2 4413.68 0.29233 209.293 2117613.9387 248.177 5327.27 294 24.6578
6.738 3936.34 946.62 0.24048 37.0357 536813.5122 52.0058 1299.63 11 44.8724
5.116 8282.61 2693.57 0.3252 69.1346 1119148.8369 116.812 4509.17 60 35.2959
12.052 5114.83 1390.42 0.27184 58.0261 685236.3553 82.466 2725.38 48 41.6281
11.534 9113.11 3093 0.3394 65.4612 1275569.5472 127.182 3910.56 23 38.5134
4.762 8246.61 2784.05 0.33759 67.9317 1095819.9748 121.509 4542.32 61 33.6206
2.706 9983.42 2810.01 0.28146 118.537 1369858.2136 139.216 4167.56 132 32.8615
8.227 7962.62 3007.47 0.37769 94.9048 1053871.0198 156.782 3239.91 77 38.0429
14.509 9454.13 3404.2 0.36007 89.4701 1303522.9686 139.039 3920.01 16 36.5254
1.967 9089.53 2217.3 0.24394 106.666 1247921.3511 145.285 3985.95 33 34.1796
2.491 15062.1 3109.49 0.20644 173.018 2129888.6941 234.536 4873.9 77 27.3356
20.637 13820.7 4348.23 0.31461 129.852 1970295.8495 180.66 5628.32 60 24.7981
3.375 15670.1 5325.87 0.33987 179.693 2161201.9282 250.447 4557.7 48 29.2346
2.56 8117.34 2017.2 0.2485 81.9871 1152700.9815 105.001 3724.93 18 33.6548
4.273 7732.51 1991.33 0.25752 55.0081 1019392.7657 98.7554 3216.41 48 38.7101
3.248 17045.3 4829.17 0.28331 227.496 2392543.4466 280.987 5701.44 125 20.8861
3.076 6165.09 1485.72 0.24098 64.4721 834517.8397 82.3916 3751.89 66 36.8842
0.743 10696.8 2692.57 0.25171 138.38 1488780.1514 168.022 4663.46 173 28.6994
4.58 6834.05 2252.78 0.32964 59.9516 935370.1944 87.6016 3254.06 30 38.5642
18.26 16287.2 5915.99 0.36322 156.559 2348294.9525 237.91 5926.56 132 26.7838
3.057 9949.41 3083.88 0.30995 97.8127 1384099.4277 136.884 3944.06 24 34.7748
18.257 20196.9 7671.24 0.37982 206.388 2676716.7774 297.625 6377.47 114 21.3722
1.305 9271.21 1924.09 0.20753 100.063 1290695.4523 134.714 3655.13 26 34.0844
6.416 19201.6 5056.85 0.26335 181.4 2751971.6947 241.95 6071.72 229 22.5501
15.301 7850.45 2056.89 0.262 82.7547 1074600.8044 115.603 3336.93 2 38.2761
8.164 9649.4 3664.14 0.37972 63.9666 1272812.238 156.379 4662.19 58 33.9031
19.517 13126.6 5004.75 0.38126 98.31 1804859.3289 166.768 10067.01 13 34.438
18.295 10534.5 3260.26 0.30948 114.06 1546625.8206 164.206 5900.92 81 25.9706
4.902 9717.76 3128.07 0.32189 90.6812 1379426.8274 136.42 4119.39 107 32.8762
20.602 14296.1 4516.9 0.31595 149.902 1978812.2 215.978 4127.98 106 31.2768
2.105 10733.2 3667.21 0.34166 130.934 1496558.1759 181.205 4101.97 49 31.0382
2.506 6459.25 2335.59 0.36158 58.6029 891548.9663 94.5064 2818.46 43 39.5252
4.351 7414.45 2555.85 0.34471 65.1865 1042830.6471 94.9208 4098.65 82 37.5184
4.168 10116.9 2028.24 0.20048 99.6177 1424569.9314 121.94 3789.76 139 35.0574
14.93 6362.38 2297.95 0.36117 61.465 845194.5616 106.831 2421.91 37 39.8186
14.423 5682.75 1518.32 0.26718 49.8383 809810.3135 71.8695 2338.07 71 42.597
18.192 10424.2 3277.03 0.31436 110.563 1402676.68 164.175 3861.77 38 37.2686
1.32 9160.81 2594.02 0.28316 86.3945 1299435.0101 135.957 4189.18 161 32.4364
4.182 10309.8 3920.13 0.38023 72.0564 1488493.4323 161.218 4242.38 98 32.6665
3.216 8806.62 2304.36 0.26166 113.961 1187663.1627 135.65 4007.13 50 34.1185
4.495 16969.8 3982.17 0.23466 243.418 2306599.134 252.648 4894.55 256 27.3883
1.367 7738.01 1806.06 0.2334 70.4405 1126513.8881 98.4799 3092.23 20 37.774
1.957 14950.4 4958.79 0.33168 171.014 2062851.4106 223.176 5297.43 174 46.5464
3.661 6102.63 1794.93 0.29412 57.0522 846093.9985 80.6411 2999.32 38 39.7379
6.295 8268.08 2564.87 0.31021 68.0438 1115483.6603 122.742 4523.94 64 38.4157
5.451 7987.09 2094.2 0.26219 98.4494 1056160.4428 129.763 3744.09 33 36.3212
1.6 9004.33 2460.44 0.27325 90.7131 1277267.6222 118.815 3835.77 11 34.5921
2.46 13098.5 3714.34 0.28356 165.799 1826704.9443 195.98 4898.8 54 28.6172
18.615 13304.1 3996.9 0.30042 119.727 1845253.7832 164.622 5457.38 59 30.3557
14.062 10362 2980.12 0.2876 111.278 1399187.0767 118.504 4611.68 33 32.1468
19.146 10247.2 3520.67 0.34357 95.6326 1475625.5446 165.815 4277.56 84 29.9826
20.196 21690 8443.73 0.38929 198.422 3003873.745 317.214 7638.15 131 25.9685
9.883 9828.02 2206.54 0.22451 87.1576 1355166.3132 120.468 4596.84 41 32.5594
17.947 16541 7072.15 0.42755 136.65 2274707.4737 247.364 5539.41 109 27.3021
9.308 4485.07 879.77 0.19615 35.0417 608496.1316 56.869 1478.99 14 44.3606
2.262 6185.24 2024.05 0.32723 59.769 861493.9491 91.8017 2672.66 48 40.6655
18.055 11306.5 3953.04 0.34962 103.687 1475470.9078 170.134 3968.2 97 35.2578
12.286 5310.58 1662.82 0.31311 41.962 756278.9084 63.8383 2577.05 67 41.9073
1.914 6779.83 2180.77 0.32165 75.1377 919459.0437 99.9768 2889.4 99 39.0274
13.108 6989.85 2405.89 0.34419 76.8935 958762.7616 107.431 2825.97 97 33.8001
17.518 8533.6 3067.67 0.35948 70.0391 1209993.629 109.655 3413.6 64 38.5273
1.55 11229.3 4843.3 0.4313 105.186 1534982.7217 175.01 6083.23 46 34.1563
1.638 10591.5 2566.25 0.24229 122.908 1465750.1752 162.282 4641.02 72 30.0102
1.635 12287.2 3709.75 0.30191 161.038 1731839.109 225.207 4221.82 88 31.2035
1.371 5757.11 1185.11 0.20585 59.1224 792867.0747 74.9705 2685.3 18 40.8018
7.104 6016.46 968.11 0.16091 54.1132 842403.1818 62.441 3004.82 15 39.5784
12.476 7439.5 1659.84 0.22311 54.5966 1017524.4205 90.7994 2801.24 41 40.9139
10.353 18355.8 6195.8 0.33753 209.203 2558732.9912 293.475 6006.2 218 19.8821
2.239 7733.87 1896.41 0.2452 72.2541 1129502.9124 96.8711 3053.56 16 36.6581
0.644 8010.57 2056.05 0.25666 84.519 1102084.2683 112.631 3100.55 21 38.029
8.513 5662.26 1979.06 0.34951 55.0225 779841.9624 77.1529 3090.77 16 39.9585
8.572 14816.9 3813.71 0.25738 159.973 2087744.4401 225.437 5479.68 73 24.7876
2.629 6445.79 2332.26 0.36182 61.2554 902291.2244 90.4335 2756.88 46 40.1682
1.261 14336.2 2737.4 0.19094 178.598 1988992.602 225.806 4692.64 26 28.2451
14.257 8353.92 2219.99 0.26574 85.327 1119292.8902 100.802 3518.63 28 37.6078
1.536 14245.4 2998.8 0.21051 176.143 2014997.4747 195.03 4059.78 138 32.0924
3.648 11836.5 3346.48 0.28272 138.37 1652271.5264 165.459 4567.3 63 31.4363
2.931 12906.7 3502.18 0.27134 155.989 1824890.1154 198.848 4810.09 66 28.4178
14.425 9486.63 3554.95 0.37473 92.6562 1355002.9605 128.649 3544.47 26 33.8636
16.744 7837.7 2912.4 0.37158 59.0536 1099527.8734 124.452 3785.48 58 36.1393
3.592 19924 6350 0.31871 248.526 2774744.5464 315.074 5504.57 79 22.8094
3.068 14178.8 3223.04 0.22731 204.459 1983670.6077 236.561 4919.78 130 26.8583
3.94 5667.22 1549.05 0.27333 50.0899 786956.7054 70.0343 2554.93 31 41.8598
16.396 9569.45 2758.6 0.28827 76.0219 1357408.2763 114.937 4133.39 35 30.8815
13.622 6621.41 1907.66 0.2881 62.7689 872289.2133 97.8011 2778.85 0 38.5617
11.188 7097.15 2117.1 0.2983 64.7094 1023352.601 80.889 3314.43 53 40.3383
5.838 15065.6 4949.02 0.32849 182.486 2091395.9731 230.655 4675.99 28 28.2712
1.656 10704.3 3756.21 0.3509 99.5977 1489092.4284 160.254 5891.05 46 33.6942
9.424 4416.82 1598.01 0.3618 46.0449 634466.1518 61.9896 2438.07 47 43.3707
4.12 6369.8 1009.43 0.15847 59.7617 876189.9317 75.644 2688.57 35 40.6857
1.513 10054.9 2632.29 0.26179 101.906 1385705.4543 141.096 3692.87 122 35.5265
1.25 9549.51 2216.47 0.2321 123.168 1310347.1839 155.552 4594.94 72 30.2421
10.37 4462.77 1680.17 0.37648 29.8643 616642.9875 68.4021 1993.21 52 44.5859
14.101 5814.07 1505.28 0.2589 65.0653 780932.881 78.5916 2679.7 42 40.9351
7.238 4791.47 1185.05 0.24732 30.1417 675674.8119 51.2364 2192.6 56 43.866
4.24 11114.4 3681.81 0.33126 116.025 1542584.6599 164.847 4319.43 77 33.2227
1.399 14913.6 3886.47 0.26059 188.28 2107831.1039 211.024 5684.93 66 22.9465
2.394 9540.51 2552.82 0.26757 121.869 1304576.706 143.468 4153.63 131 32.8198
9.068 6246.9 2393.84 0.3832 67.285 892911.3058 105.766 3098.23 43 38.9057
3.884 5990.59 1198.87 0.20012 52.5297 834108.787 69.4188 3005.11 19 39.568
9.07 11184.3 4658.28 0.4165 128.622 1537566.8823 194.209 3861.72 41 31.3926
12.886 10294.8 3760.75 0.3653 94.5346 1470163.8901 135.647 3655.01 57 34.7629
20.611 15559 4124.65 0.26509 172.621 2193175.3956 269.363 4683.48 58 28.5665
4.675 10257.1 3152.27 0.30732 102.389 1448310.2715 141.636 4223.73 22 34.0179
11.708 5363.04 1757.29 0.32766 44.3474 758355.3043 75.5525 2608.47 56 42.3843
18.938 23326.3 9459.97 0.40554 175.362 3232510.7891 377.575 6081.74 152 20.4607
20.038 17429 5262.46 0.30193 185.475 2433583.354 218.781 6206.28 137 25.2533
13.618 7440.89 3145.89 0.42278 49.0741 1062430.4803 105.707 2669.25 29 40.0401
17.125 8332.8 2836.64 0.34041 61.1424 1196261.8533 107.917 4115.42 38 38.1242
1.833 11632.6 3082.86 0.26501 138.959 1607179.807 157.086 4510.64 91 30.6543
16.151 7356.91 2822.53 0.38365 67.2724 987570.8049 102.675 2970.51 39 38.0236
2.634 4838.22 934.46 0.19314 41.9773 649524.3158 62.2807 2720.16 11 42.1036
18.147 15236.1 4182.73 0.27452 148.166 2089783.3936 248.417 4660.36 109 30.8606
4.86 13071.2 3760.96 0.28772 163.793 1795923.1026 212.43 4762.48 132 28.3224
20.156 11943.2 5161.99 0.43221 99.0361 1573185.534 195.491 4192.56 86 34.1006
14.872 9429.86 3748.1 0.39747 50.8853 1327097.5018 161.368 3134.06 82 38.4836
1.518 7695.75 1875.58 0.24371 82.0871 1073047.1805 108.397 3866.81 18 36.2447
1.541 6678.3 2178.64 0.32622 64.6722 896208.246 97.6525 3143.97 22 40.2037
1.746 10395.2 3233.18 0.31102 124.394 1394189.6866 160.137 4041.51 41 33.7611
1.614 12355.7 3285.28 0.26589 147.851 1768781.1162 171.244 4773.76 26 29.0944
1.002 6744.39 1940.65 0.28774 77.4015 921802.7948 104.568 3055.88 79 39.0896
3.158 6073.15 2157.48 0.35524 55.0452 841158.9872 81.7542 2702.93 26 40.8226
16.894 8082.96 2565.74 0.31742 65.8673 1110177.5582 92.6098 3548.21 108 35.987
20.278 14085 3103.48 0.22033 147.891 1924917.0807 184.897 4052.23 111 32.3824
17.751 12834.3 5153.55 0.40154 99.0545 1698069.1085 197.957 4413.32 77 33.7436
3.287 11895.3 3661.08 0.30777 150.273 1667887.4632 162.759 5174.76 44 27.1219
8.625 16538.4 7518.33 0.45459 244.738 2281337.4552 342.383 5677.21 207 23.1657
3.437 11421.5 4267.02 0.37359 109.756 1637335.2467 168.675 4484.56 75 31.374
1.341 7387.2 2292.08 0.31027 71.7183 1002105.0045 119.266 3107.41 80 39.3309
16.073 9176.3 3476.36 0.37884 71.5828 1319038.2785 128.897 3839.15 76 39.2855
13.895 6209.64 2342.25 0.37719 48.7193 873861.4889 99.5809 3200.09 73 36.0755
12.007 8065.71 1544.39 0.19147 75.0503 1130012.7301 92.5569 3158.67 33 36.276
2.673 5702.94 1696.58 0.29749 45.94 838212.2588 64.6405 2469.07 25 41.9308
16.846 7729.95 2710.25 0.35061 79.0196 1090594.5074 145.178 3858.94 89 35.2647
1.712 7862.16 1512.77 0.19241 79.3304 1109539.5477 104.351 3764.43 12 34.3327
1.922 7588.2 2013.21 0.2653 69.2692 1053632.1349 103.275 3566.62 28 34.8346
1.627 21278.6 5842.31 0.27456 289.455 2892438.0692 321.505 6603.69 279 18.7297
1.375 13676.4 4322.07 0.31602 168.39 1888529.5026 211.467 5214.07 198 27.3306
14.22 19176.2 6638.15 0.34616 220.219 2620723.2382 332.048 5198.53 143 25.2378
1.612 4215.24 1250.05 0.29655 33.7698 579038.7909 48.698 1408.76 19 44.2712
12.97 8300.54 2854.71 0.34391 77.4586 1144650.683 127.278 3428.52 101 36.9641
18.112 10691.6 3260.11 0.30492 99.9591 1543815.9075 156.127 4235.25 158 32.8549
1.181 6937.77 2571.23 0.37061 61.8935 1015684.9147 92.1794 3201.52 31 38.8614
3.114 15788 4006.24 0.25375 183.764 2238089.3152 233.717 4623.46 34 29.2379
1.558 10303.2 2962.59 0.28754 124.106 1425758.2731 170.995 4648.63 76 29.8908
12.226 7760.26 2299.18 0.29627 73.3685 1046577.6989 106.374 3739.04 91 36.3877
1.895 12768 3187.17 0.24962 139.533 1751882.3585 186.771 4389.51 23 29.6257
17.079 8755.66 2935.1 0.33522 129.879 1234211.0283 161.564 4191.05 80 32.9731
4.645 9103.55 3070.52 0.33728 93.5366 1303196.8947 128.604 3959.01 73 37.2465
3.706 3344.43 1348.71 0.40327 10.6891 453815.2734 42.1948 1496.33 32 45.0784
15.793 9387.91 4103.06 0.43705 91.6756 1345078.9146 161.296 4217.45 85 34.6616
13.351 4006.69 818.86 0.20437 42.0054 543209.2405 58.4383 2575.2 13 42.6478
0.455 8706 2233.4 0.25653 100.611 1221753.1046 127.63 3232.23 4 36.9442
4.343 5070.81 1709.24 0.33707 45.3367 700400.6997 64.9645 1870.52 13 43.7854
1.459 5790.43 1289.54 0.2227 51.3771 833446.5476 76.274 2893.13 60 40.1548
13.49 6641.57 2584.43 0.38912 61.9914 890136.9471 111.968 3515.17 64 37.946
1.713 7034.22 2252.84 0.32026 63.4024 951025.3126 101.117 3145.77 26 39.7262
12.652 10189.2 3083.25 0.30259 68.9355 1470219.2285 127.218 3560.7 76 37.213
0.688 7918.48 2086.47 0.26349 82.7789 1084705.9699 114.149 3117.92 20 37.6752
15.588 10100.6 2386.69 0.23629 104.132 1411094.2805 121.37 4274.73 156 32.2717
1.668 9380.64 2194.21 0.2339 110.639 1299205.9865 132.951 4172.28 58 34.121
11.282 6573.81 1751.66 0.26646 61.784 931934.8407 75.2564 3435.44 55 40.2348
1.556 12082.7 3163.48 0.26181 156.962 1721649.9661 162.491 4735.39 29 29.1932
3.726 12843 3985.87 0.31035 172.455 1766196.1283 203.144 4821.6 104 28.3374
2.064 14175.8 5308.42 0.37447 178.407 1994070.7146 246.964 4447.59 40 26.8066
4.218 15762.5 5161.05 0.32742 165.002 2200182.8779 269.72 4609.67 112 30.6562
3.564 15757.1 3524.41 0.22367 171.874 2229266.2691 230.701 4908.13 74 27.1593
10.103 6632.58 2172.28 0.32751 55.8594 930450.1434 87.5881 2744.99 38 40.2499
1.212 8745.21 1979.25 0.22632 86.0071 1250778.1827 108.966 4057.08 101 34.8833
11.263 7554.57 1991.22 0.26357 69.1247 1003733.199 92.8138 3982.42 13 34.8827
10.812 6920.49 2520.95 0.36427 78.6498 963242.1429 112.482 3450.49 28 36.3562
3.242 17096.4 6155.22 0.36003 200.353 2233746.3606 238.286 4489.68 106 29.8511
5.727 6744.39 2660.74 0.39451 48.5841 946595.2999 99.806 3486.33 30 39.8113
3.065 13929 3169.31 0.22753 188.29 1926202.4354 244.276 4923.89 127 26.9188
10.903 5306.48 1365.71 0.25736 63.733 713522.8027 76.5096 2768.14 24 40.4682
1.576 13762 3443.79 0.25023 191.112 1883021.3579 214.614 4583.25 178 29.0672
2.066 8888.04 2424.05 0.27273 85.183 1206606.6784 118.512 3834.28 31 34.9522
2.019 11613 2950.52 0.25407 147.279 1606889.0119 183.686 4155.48 62 31.7585
11.935 7222.29 2622.63 0.36312 54.9804 1027606.2001 102.969 2750.78 48 41.0074
2.4 4409.19 812.76 0.18433 44.1605 599253.1882 64.8904 2582.95 12 43.0907
3.648 5582.97 1349.27 0.24167 52.4239 788958.6881 72.9469 2488.97 61 41.7023
10.178 5940.44 1586.54 0.26707 54.7479 818477.4217 87.9471 3101.74 18 39.2811
1.28 10828.6 2173.95 0.20076 113.086 1489225.8867 170.871 3941.66 58 33.1051
1.544 3828.72 1200.98 0.31367 34.0591 521014.0911 48.6031 1399.85 17 44.2753
11.128 15277.4 5677.32 0.37161 104.612 2094347.0522 242.266 4097.33 20 33.3633
1.586 10083.9 2486.22 0.24655 123.753 1395479.2318 162.408 4630.78 69 29.9976
18.511 9928.55 4216.05 0.42463 87.4945 1371879.3304 151.282 5104.71 49 31.7568
16.021 8701.06 3467.13 0.39847 103.972 1125397.6796 140.246 3732.95 63 35.5149
17.959 7934.76 1726.86 0.21763 75.2691 1108967.8805 92.7502 3225.24 24 37.3093
14.353 6872.06 2429.5 0.35353 37.7663 952704.4457 102.788 2972.79 22 39.7381
3.114 7890.18 2659.02 0.337 74.2617 1093857.5577 116.597 3974.76 44 34.1738
18.475 11340.3 3046.77 0.26866 135.399 1553431.9201 142.883 4716.65 88 30.1366
18.292 14247.9 4063.92 0.28522 152.694 1942685.4514 192.032 4636.74 23 31.5884
1.971 9279.95 2083.42 0.2245 102.116 1266645.6746 144.892 3997.56 38 34.2074
14.618 6936.24 1058.58 0.15261 75.6919 932552.5988 90.0923 3122.49 32 39.9028
10.078 7503.14 2020.53 0.26929 60.4072 1020943.1186 92.6519 3391.38 33 37.7389
2.359 11691.3 2992.71 0.25597 121.747 1590986.0811 156.113 3951.8 225 32.5318
14.107 6193.09 1732.31 0.27971 55.7564 839428.2606 84.6699 2783.39 51 40.6418
13.957 6370.05 1919.36 0.30131 48.0579 878320.4788 81.846 2426.54 2 40.6339
3.718 9959.76 3171.74 0.31845 95.8682 1409446.9393 134.661 3670.09 10 35.149
16.686 6014 2169.43 0.36072 40.6266 813707.0834 98.6446 2012.06 17 41.7829
13.155 8569.62 2955.75 0.34491 79.1479 1141791.6727 115.928 3543.18 42 36.3101
1.926 9796.83 3066.23 0.31298 88.3071 1398808.5342 142.431 4089.24 18 34.7717
4.417 16028.4 4479.58 0.27947 234.147 2195657.6999 277.587 4732.34 279 26.1278
15.632 8947.46 3814.55 0.42632 90.1858 1288455.0301 153.359 3214.18 96 37.7177
17.673 11374.4 3484.02 0.3063 106.254 1632260.1134 166.015 4306.45 132 32.6034
3.284 5454.38 1967.01 0.36062 55.5147 758394.684 77.7062 2590.64 30 41.4229
12.896 7090.09 2599.24 0.3666 68.2404 1003598.0318 97.0313 3246.12 91 38.305
3.37 13454.6 4227.6 0.31421 136.14 1873407.0028 188.221 4385.42 36 30.848
4.672 8245.78 2958.16 0.35874 75.8276 1147690.3552 119.365 4025.63 49 36.6927
12.615 8166.99 3184.82 0.38996 71.522 1159092.3537 120.416 3884.16 43 35.8432
13.652 9854.5 3583.79 0.36367 101.992 1389399.1791 132.954 3574.98 34 33.7196
5.524 12787.5 4671.88 0.36534 196.353 1670033.5504 261.262 5131 177 26.0513
16.047 9133.52 2546.6 0.27881 113.303 1247824.2371 156.123 4151.45 75 29.0135
3.767 9772.39 3352.02 0.343 70.4268 1339186.8151 143.009 3823.45 109 34.9846
19.058 16438.8 4626.99 0.28146 195.492 2309508.6004 286.064 5218.35 255 21.7786
8.71 7887.83 2304.49 0.29215 69.7834 1097989.0527 111.007 3363.09 32 38.0565
13.567 7134.1 1569.43 0.21998 60.0044 1022479.9152 99.1239 3194.73 59 38.2687
15.931 8643.31 3653.43 0.42268 72.0891 1175277.241 145.09 3662.43 75 36.4443
3.983 10409.6 3083.33 0.2962 125.118 1485218.2951 162.621 4351.5 45 30.4404
15.862 11693.7 3228.9 0.27612 112.852 1535361.2931 150.172 4488.66 33 30.0508
4.315 12642.8 4953.07 0.39177 185.978 1646911.5878 210.062 4051.87 154 32.0169
4.489 5006.99 1332.33 0.26609 48.9851 661607.785 69.4153 3154.61 20 40.2423
2.55 18388.4 5272.82 0.28674 232.458 2552549.6327 284.901 5825.22 178 21.4341
11.796 12407.6 4154.96 0.33487 119.906 1630466.0243 179.199 4565.37 88 34.3359
14.675 6604.64 1439.1 0.21789 63.1806 906652.872 70.9087 2878.87 29 40.145
12.865 8478.45 2428.84 0.28647 90.6719 1167843.8945 113.014 3841.69 23 37.3026
1.639 10899.7 3805.51 0.34913 134.06 1519824.5739 182.038 4286.69 55 32.3955
11.932 7184.31 3160.87 0.43996 47.819 1028848.0364 104.763 2710.01 27 38.476
2.514 11997.8 2957.95 0.24654 131.744 1631975.2372 155.455 3968.27 227 32.4904
5.179 10205.4 4097.63 0.40151 86.1088 1473065.7284 158.84 4394.6 55 34.9765
17.174 9760.04 3470.38 0.35557 68.6064 1388880.8281 129.019 4901.73 24 39.2043
15.676 11871 4991.84 0.4205 103.518 1683858.4344 161.12 4599.6 74 34.2444
4.048 16559.5 5014.89 0.30284 242.575 2249973.8636 276.205 4887.36 274 26.8555
5.042 17749.4 6732.4 0.3793 182.007 2434441.1512 273.525 7190.38 108 24.2014
7.032 6858.91 1873.67 0.27317 60.9492 910911.1122 84.3174 3387.3 40 38.1279
8.109 9040.72 3209.02 0.35495 76.1399 1258729.221 114.146 4402.77 25 35.9339
17.076 16160.5 5256.48 0.32526 161.908 2320319.92 222.153 5830.45 132 27.2255
11.31 4678.09 1226.83 0.26225 34.9324 642315.4259 56.5448 1897.8 26 43.5739
7.757 5497.19 1295.21 0.23561 49.4769 751902.8595 68.7162 2393.1 25 42.3403
10.422 7594.32 3262.61 0.42961 66.9827 1051933.7088 114.265 2385.46 69 40.3947
1.483 7690.65 1817.7 0.23635 98.3611 1050675.559 109.567 3344.25 117 36.6819
9.193 5464.47 1628.08 0.29793 44.0423 707715.149 73.9402 2087.51 29 43.0005
11.614 8225.25 2046.31 0.24878 67.6528 1126811.1906 108.604 3692.91 55 37.5282
16.181 11316.7 3053.25 0.2698 118.705 1589945.9739 130.97 4186.06 139 31.7224
8.455 14534 4362.33 0.30014 153.107 1999455.8906 216.683 5369.2 18 31.2786
11.381 10159.2 3833.94 0.37738 85.3282 1443368.5898 147.919 3903.81 48 35.8605
1.535 7306.07 1703.53 0.23316 85.314 1017910.6435 103.403 3858.57 24 35.4459
10.887 7250.25 1780.09 0.24552 59.1257 992859.7014 89.9901 3228.17 25 38.3711
1.851 13619.9 2837.59 0.20834 157.047 1849558.805 220.465 4765.77 110 28.5675
9.626 7177.59 2568.2 0.3578 65.3221 981194.3015 111.983 2790.13 96 38.8672
4.902 13924.6 5413.36 0.38876 185.713 1877007.6576 263.554 5385.4 193 27.1962
20.156 10511 2758.04 0.26239 99.9912 1467382.9006 132.351 3935.19 55 33.7054
0.901 6942.03 2043.83 0.29441 78.9713 943220.5582 107.916 3072.1 79 39.0353
4.327 8366.79 2684.87 0.32089 69.2233 1117904.3096 121.956 4542.61 63 34.2574
16.148 10150.6 5217.01 0.51396 92.8909 1458986.8075 163.026 3836.52 54 33.0199
3.898 4911.53 1593.63 0.32446 51.1978 692890.7528 64.9662 2153.28 28 42.992
3.939 9276.42 3803.15 0.40998 89.456 1292710.152 131.967 3859.55 105 34.1684
18.689 13676.6 4603.5 0.33659 144.388 1832802.2782 224.475 4874.16 97 27.115
2.159 7003.47 1636.87 0.23372 66.8442 967091.8866 99.4085 3429.54 23 37.9692
2.639 18154.3 5211.98 0.28709 256.616 2446380.0858 312.254 5668.29 319 21.6126
3.103 12506.9 2912.93 0.2329 122.239 1701293.8743 151.001 4093.98 238 31.9076
1.777 16330.4 5192.65 0.31797 230.721 2229395.3001 266.2 5441.2 145 24.1039
1.57 7319.45 1513.39 0.20676 76.3829 988334.6651 115.541 3440.84 34 35.0244
4.216 10549.4 3920.22 0.3716 126.062 1425892.7667 195.34 4552.7 154 30.6517
15.356 10314.2 3396.71 0.32932 95.4642 1453466.4147 133.584 4591.75 112 31.9429
2.19 3951.63 1046.51 0.26482 36.9538 559929.0933 42.3076 1787.93 7 44.5339
16.428 9599.41 2303.45 0.23995 94.2239 1331523.3669 121.037 3787.06 64 34.3882
4.556 12725.7 3929.6 0.30879 137.125 1734195.1329 180.463 4507.58 114 30.965
13.088 14436.4 4296.57 0.29762 157.716 2027595.3203 196.574 5369.4 153 24.756
2.869 4852.57 1230.52 0.25358 48.9717 616366.2356 61.798 2100.65 41 42.9576
9.087 9012.28 3512.31 0.38972 78.8114 1222712.2072 133.842 3700.49 96 34.6241
1.9 13749.1 3550.29 0.25821 191.524 1865673.9946 216.27 4618.48 178 28.8239
18.047 11235.4 4116.26 0.36636 68.8649 1560952.5105 163.753 4642.62 98 32.5381
15.189 6307.81 2185.95 0.34654 57.0911 895529.1971 88.8344 2498.56 69 41.8811
1.452 9549.46 2775.99 0.29069 92.0544 1317149.8496 141.579 3559.2 117 35.5926
12.516 14844.1 4556.61 0.30696 165.645 2009840.3614 262.36 5087.85 135 26.5079
15.019 10293 3015.09 0.29292 92.8658 1466637.416 123.653 3769.79 81 34.6836
6.876 4035.62 1575.69 0.39044 26.6803 548376.0586 52.8617 1957.24 6 45.0142
2.991 12322.2 3883.97 0.3152 156.184 1693126.9683 193.481 4843.35 65 28.5338
3.153 3328.18 1053.58 0.31656 24.251 452984.9483 36.0849 1381.83 2 45.5305
3.364 12818.2 3699.52 0.28861 173.384 1793882.7281 193.092 4730.61 121 29.0448
2.086 13614.6 3864.04 0.28381 151.149 1851179.6015 210.809 5499.22 77 29.3369
1.611 5864.59 1318.73 0.22486 53.243 856539.2462 73.3611 2879.43 58 40.0785
19.227 12876.5 4724.82 0.36693 119.499 1812709.0825 172.343 5066.71 153 27.8288
12.915 9402.76 2859.36 0.30409 75.1175 1345767.6739 104.884 3459.77 28 34.1493
19.103 11545.8 3170.23 0.27457 147.956 1650345.823 164.193 4322.93 126 29.4389
0 15392.9 3214.97 0.20886 202.053 2171633.9293 255.918 5614.82 89 46.5464
2.873 11613 2950.52 0.25407 147.279 1606889.0119 183.686 4155.48 62 31.9145
12.844 5551.28 1526.76 0.27502 45.6104 782614.9125 84.9437 2327.13 76 41.8024
1.4 14935.1 3136.04 0.20997 165.04 2112462.4142 213.76 4079.52 138 32.0197
18.603 12891.1 4174.29 0.32381 124.292 1844868.6027 167.391 4828.71 51 27.6706
3.114 7432.18 2015.22 0.27114 71.0693 1009577.8572 100.456 3388.64 77 36.7053
3.432 7864.63 2403.12 0.30556 73.2899 1065478.7375 112.935 3436.9 73 35.7109
4.734 6743.79 2520.14 0.37369 64.7486 947053.7303 94.5936 3839.67 61 36.6395
11.526 7455.52 1750.79 0.23483 53.7067 1056569.755 82.069 3367.17 16 40.0052
2.365 4828.98 1472.47 0.30492 44.976 666774.1373 60.8637 1881.46 15 43.6611
17.197 14324.4 5582.22 0.3897 197.651 1897487.6212 268.195 4615.24 131 30.3665
2.026 12180.4 2755.63 0.22623 146.52 1695981.6886 187.497 4121.7 68 32.0426
11.567 4803.04 1070.19 0.22281 38.2321 651604.8541 58.8556 1952.99 10 42.8896
3.285 13585.9 4455.63 0.32795 136.026 1901164.9254 186.652 4330.84 38 31.2147
2.052 16161.8 4867.94 0.3012 211.754 2226941.4483 303.967 5726.29 87 22.6017
10.829 4643.43 1678.84 0.36155 48.1884 624560.5192 66.9019 2236.51 27 42.434
2.096 11307.8 3703.8 0.32754 130.798 1577719.7009 179.161 4195.87 47 31.4942
0 16046 5174.11 0.32245 191.898 2247869.4361 254.103 5444.92 137 23.766
6.015 7761.1 2340.07 0.30151 78.67 1090117.3728 122.352 3684.54 73 33.7314
1.695 8726.67 2133.35 0.24446 85.7823 1248891.8743 115.184 3898.65 2 34.4269
1.57 7362.8 1694.63 0.23016 69.1988 1001499.4312 104.519 3595.97 25 36.7787
1.596 4809.08 1610.32 0.33484 37.4341 688632.0549 58.1736 2197.83 12 43.044
18.537 14262.9 4557.68 0.31954 155.672 1929977.7626 221.463 5011.43 12 30.923
17.432 8579.07 2976.87 0.34699 56.2522 1204757.0728 133.401 4959.11 91 33.6879
12.149 9773.31 2251.37 0.23035 65.627 1356779.3729 137.459 4234.49 45 35.9245
2.924 5367.57 1713.92 0.31931 72.3631 740417.078 81.5685 3008.11 34 40.3388
15.168 11659.7 3699.53 0.31729 109.299 1699155.1683 161.934 4539.13 78 31.4204
1.297 7992.97 1641.57 0.20537 75.2794 1148861.3757 99.0549 3899.06 9 34.8404
12.525 8255.36 2947.72 0.35706 48.989 1056525.1972 139.422 5891.23 39 40.4027
19.238 13771.4 4474.69 0.32492 139.908 1940256.9689 170.427 4697.72 110 29.2381
6.145 6942.17 2007.46 0.28916 60.8422 952933.2503 83.1004 3320.56 19 38.1932
10.09 5161.96 1639.74 0.31765 29.8817 728597.9258 62.9929 2437.95 39 42.5017
9.313 10168 2590.11 0.25473 99.8453 1408364.0279 127.301 4221.97 36 31.4611
2.605 14675.4 3614.72 0.24631 216.251 2048550.095 231.359 5020.98 133 26.3448
18.787 10404.9 4357.91 0.41883 87.3016 1443759.8771 173.206 3793.41 7 35.7703
6.4 6200.45 1746.65 0.28169 60.2167 865056.231 79.678 2992.93 28 39.6709
4.559 5631.65 1356.99 0.24095 65.0947 765804.0217 83.8139 3059.86 53 39.8772
1.939 11578.8 3008.71 0.25984 135.035 1605452.3041 174.266 4551.39 84 30.9022
2.415 15637.6 4338.75 0.27745 218.453 2247245.6308 280.063 5523.62 100 22.2499
5.461 5948.76 1675.61 0.28167 56.1323 778549.8724 80.299 3043.34 44 39.6814
1.375 9739.98 3584.57 0.36802 123.69 1311875.4668 184.868 4441.17 175 31.1032
14.871 6030.5 2516.36 0.41727 50.6878 828002.8428 98.399 2679.14 84 40.2533
2.83 13968.6 3993.31 0.28587 168.069 1960730.4614 205.577 5219.7 203 27.3628
2.778 13736.8 3780.15 0.27518 194.679 1865646.5478 212.411 4595.77 171 28.9273
2.533 10244.3 2521.36 0.24612 133.093 1439857.6576 154.645 4376.88 59 31.9118
3.001 5891.97 1992.49 0.33817 58.6562 806239.4209 88.6477 2403.25 22 41.119
10.187 6869.32 2118.45 0.30839 62.5391 945700.3099 90.8145 3124.82 28 39.4705
17.263 7482.68 2591.79 0.34637 64.9247 1061481.663 101.783 3265.66 21 38.6337
3.114 10499 2505.65 0.23865 96.0227 1397706.3842 170.983 3887.76 96 33.3439
2.149 6218.72 1388.2 0.22322 65.941 886302.9549 70.7251 3099.86 14 38.7033
1.477 4978.46 1736.61 0.34882 49.6151 696637.2334 71.65 2177.75 29 42.2395
3.064 11895.1 3326.08 0.27961 148.856 1612175.0284 138.952 4468.93 99 30.9623
3.18 7634.92 2157.63 0.2826 77.6581 1030109.5259 99.0837 2938.54 93 37.1259
1.65 14722 4671.05 0.31728 160.817 2038221.8833 227.16 5282.18 186 29.7661
2.357 16522.1 5107.99 0.30916 204.123 2161430.9635 254.023 6470.69 259 21.9209
16.674 14459.3 4536.57 0.31374 117.903 2071387.0005 187.838 4395.99 147 33.2255
4.293 9342.84 3149.97 0.33715 88.467 1319202.2225 139.41 3856.58 33 35.5595
1.814 12216.9 2556.62 0.20926 152.543 1707539.1319 177.866 4665.63 144 30.0772
18.913 14078 5585.59 0.39676 104.612 1938081.7105 227.337 4703.87 97 30.0856
12.26 7929.27 2276.74 0.28713 64.9002 1069027.9769 96.7206 3547.44 33 35.5779
18.262 10030.1 4723.23 0.4709 90.4394 1405467.3656 168.268 4102.58 30 34.4956
5.991 7379.15 2388.1 0.32362 56.4118 1003781.7345 115.179 3371.66 24 38.6982
19.304 13563.8 4084.18 0.3011 114.042 1967974.342 177.721 4065.48 138 34.5278
5.24 4915.72 1480.72 0.30122 47.9667 686731.7855 63.5405 2008.25 3 42.1592
16.693 9363.01 3469.96 0.3706 75.7206 1323526.9395 134.044 3530.28 47 36.5147
12.055 8682.03 2660.38 0.30642 80.6252 1132983.4666 123.901 6968.83 63 36.7288
1.227 10099.9 2360.43 0.2337 125.03 1404214.1082 160.563 4600.68 73 30.2264
18.179 16435 5382.32 0.32749 104.443 2371481.7368 214.835 5826.18 87 25.8629
2.598 8035.94 1560.08 0.19413 81.1453 1129433.4806 101.025 3812.31 15 34.0072
13.311 9484.8 3951.82 0.41664 90.4235 1288118.0388 132.245 3749.96 55 36.8425
16.369 13595.5 5652.44 0.41575 188.701 1831114.4452 261.675 3975.95 196 32.317
2.73 9813.17 3278.54 0.33409 106.02 1348060.5908 149.148 4741.6 45 33.0987
14.264 15115.8 5076.91 0.33586 137.258 2168329.0754 192.586 5433.31 46 25.0342
1.831 6628.95 1823.15 0.27502 67.8739 891585.3099 87.9706 3005.94 19 38.9427
1.525 9411.86 2189.14 0.23259 113.377 1314684.5481 129.339 4230.66 57 33.8723
11.273 9297.13 2278.99 0.24512 85.9807 1286223.7232 126.52 3733.44 9 36.7811
2.401 11152.4 3627.8 0.32529 126.585 1552286.8747 180.329 4193.8 44 31.1416
3.281 5614.48 1522.85 0.27123 45.5785 804043.5459 63.6388 2580.81 18 41.2318
2.408 18401.4 4977.81 0.27051 225.554 2535829.1845 270.222 5638.94 197 22.4471
2.438 18547 5001.42 0.26966 229.905 2565495.3452 272.815 5668 194 22.3182
4.914 8446.81 2229.76 0.26397 71.1549 1190384.6683 112.185 4124.62 16 34.3798
4.039 5475.99 2222.52 0.40586 54.8868 758425.0847 91.2384 2653.85 39 41.07
2.395 15105.1 3526.7 0.23347 204.827 2079228.6179 258.151 5076.29 152 25.5404
1.327 6504.17 2195.6 0.33756 53.5996 902876.3193 100.095 3610.1 72 37.1426
2.17 8318.02 2451.15 0.29467 94.8478 1179274.4962 114.453 3553.88 98 36.8141
7.678 16810.3 4595.19 0.27335 176.165 2390497.8624 229.45 5906.61 217 21.4057
9.761 7942.46 2496.07 0.31426 79.5181 1052554.6412 112.569 3206.74 77 38.4271
17.337 10207.8 3949.02 0.38686 75.5599 1370949.2346 150.441 3970.54 34 35.5759
14.966 9228.03 3227.47 0.34974 96.5086 1278060.5187 125.99 3496.09 80 37.5407
5.557 15369 4220.37 0.2746 187.223 2093854.1724 247.081 5190.52 109 25.8504
2.08 9505.23 2147.09 0.22588 112.785 1313665.2397 133.9 4274.06 62 33.7612
7.98 11307 3446.5 0.30481 112.945 1601137.8359 167.49 4275.93 47 33.3143
12.013 5719.31 926.42 0.16198 52.8835 800823.5853 71.8433 2928.11 24 40.5962
2.938 5850.03 1561.78 0.26696 52.3648 806940.8338 80.6402 2605.86 9 40.6062
1.238 8218.97 1607.15 0.19554 73.5678 1188703.346 96.5487 3918.35 9 34.979
10.053 6726.5 1779.37 0.26453 56.3562 962529.6708 87.4351 2466.26 20 38.4295
7.814 4320.64 1192.81 0.27607 41.1875 579944.7937 60.6908 2486.93 18 43.359
5.057 6261.66 1541.51 0.24618 52.0743 876908.968 74.6685 3066.6 9 39.6188
7.991 8490.52 2479.45 0.29202 71.3388 1119462.572 116.317 4245.28 58 35.4761
1.675 8662.5 2087.64 0.24099 112.4 1193263.4153 126.275 4214.87 55 34.1555
2.42 6288.78 1745.57 0.27756 57.754 864630.8201 80.159 2696.7 44 40.6209
3.443 10464.7 2416.34 0.2309 129.886 1421204.1488 163.203 3997.93 74 32.7451
4.948 22854.6 7218.2 0.31583 202.822 3257452.9106 353.568 6414.25 251 20.8221
5.904 10914.2 3544.55 0.32476 121.183 1512280.5265 169.105 4521.57 130 31.2103
2.012 5301.42 1715.54 0.3236 47.0166 734264.4971 72.3307 2938.06 22 41.2173
5.211 8743.64 2806.69 0.32099 70.4088 1187938.5581 116.395 3652.53 85 35.9446
1.361 8693.35 2824.59 0.32491 98.7593 1195801.1652 146.375 3279.71 7 36.5168
9.891 5453.68 1019.8 0.18699 34.3123 765522.355 63.9524 1920.54 65 42.9677
18.293 11056.3 3997.42 0.36155 91.327 1551040.3672 145.49 4003.87 55 33.4567
1.863 8235.61 1814.31 0.2203 79.063 1181187.9363 102.296 3678.26 23 35.4408
1.85 6944.03 1876.56 0.27024 72.1624 938807.2724 92.7649 3007.25 24 38.9032
2.657 12578.1 2842.73 0.226 136.14 1751660.2849 139.634 4525.6 52 30.5861
15.291 7598.42 2576.49 0.33908 62.4925 1012366.4367 108.698 3501.17 68 36.7922
2.152 3845.73 891.81 0.23189 33.996 548309.0231 42.453 1778.59 12 44.6865
2.895 16256.3 4048.27 0.24902 211.686 2269682.1382 254.46 5225.3 154 25.3824
2.663 9506.39 2380.11 0.25036 103.748 1350830.774 152.65 4108.89 41 28.9073
14.043 8480.48 2818.46 0.33234 66.5635 1233578.3636 104.643 3171.05 70 38.1357
3.586 10155.1 2844.06 0.28006 112.746 1421606.7453 157.718 4284.62 57 33.2315
0.761 4802.63 937.26 0.19515 46.7999 682642.1418 57.7643 2199.07 76 42.8198
1.706 14217.6 3698.48 0.26013 189.715 1939573.7189 217.225 4571.85 181 28.9593
2.708 9527.87 2543.93 0.26699 112.922 1304281.6895 139.143 4052.71 54 33.9759
20.048 13883.7 6948.51 0.50047 113.874 1970673.1649 234.814 4855.9 100 30.2057
1.758 7076.85 2100.33 0.29678 67.9644 1001399.2999 90.2495 3598.79 32 37.97
17.697 17110.1 5705.79 0.33347 86.4954 2285527.7122 216.144 4120.01 130 31.897
17.253 8322.18 1861.3 0.22365 70.8224 1176432.1317 100.445 3109.99 33 38.7437
16 19103.9 5339.9 0.27951 179.039 2712217.0882 238.999 6135.16 64 21.7437
4.838 9177.22 3393.79 0.3698 84.902 1243444.7782 135.472 4199.23 30 34.8664
16.001 10726.1 3870.15 0.36081 103.509 1475313.3404 169.47 4409.51 66 32.2334
6.316 13997.5 4426.23 0.31621 158.489 1908975.321 214.821 5585.22 9 32.3902
2.465 5631.11 1630.91 0.28962 43.5029 817475.4226 67.0532 2492.75 25 41.071
20.292 15494 5281.32 0.34086 116.77 2203533.2092 217.443 4670.64 153 32.3907
3.234 16699.7 5172.28 0.30972 205.28 2196393.0406 267.162 6331.67 247 20.1185
17.967 15426.7 5298.17 0.34344 128.595 2209387.7841 206.494 5225.91 62 28.2905
11.78 12988 3814.93 0.29372 139.684 1838303.309 160.564 4658 117 30.3466
10.667 14996.2 5012.73 0.33426 117.079 2099352.1439 192.483 4974.31 145 28.7973
1.484 6476.54 2452.37 0.37865 80.1539 882128.9717 100.285 3214.79 63 38.9515
4.345 14806.3 5791.63 0.39115 185.383 1937718.8121 242.084 4350.17 112 30.5353
12.811 8041.38 2786.6 0.34653 55.2782 1141918.1591 107.729 3751.98 53 38.2341
2.025 5778.22 1952.1 0.33783 70.6767 802533.0746 86.3493 2984.94 37 40.2404
20.218 16195.9 6880.55 0.42483 187.434 2210366.5831 317.174 5408.67 149 22.9955
14.767 6637.86 1808.45 0.27244 71.5502 960974.8023 82.0342 2685.45 50 39.5288
8.406 6080.61 1434.17 0.23585 69.6611 857159.5935 76.0902 2842.08 70 39.203
3.84 5246.89 1879.01 0.35811 48.1936 727461.3397 71.4216 2247.59 20 42.0686
2.644 14797.5 4232.06 0.28599 167.903 2120212.5037 254.79 4923.81 71 26.7218
18.072 11185 4190.89 0.37468 100.06 1571338.3739 146.46 3746.34 48 34.1476
3.018 12689.6 3236.84 0.25507 129.399 1724549.9754 162.835 4093.72 218 31.8902
2.6 14887.5 3597.65 0.24165 210.673 2060535.7117 245.193 5013.58 123 26.4598
11.84 6537.91 2445.18 0.374 65.408 927058.8783 90.0088 2328.18 62 40.8488
1.52 5248.96 1065.72 0.20303 48.0599 745074.7435 68.5346 2860.52 63 40.3363
6.26 18626.8 4751.66 0.25509 184.31 2634426.6049 223.321 5730.87 227 26.1034
11.12 5997.09 2028.48 0.33824 55.4428 819082.7304 82.8936 3220.41 13 40.5079
2.106 5903.49 1972.18 0.33407 69.9432 818354.9365 86.6578 2991.36 33 40.5203
18.615 9483.5 2543.07 0.26815 92.3049 1338924.0833 108.781 4155.57 96 27.5239
11.745 8580.32 3524.99 0.41082 75.8115 1205663.8546 131.096 4050.36 48 33.8167
2.684 8640.57 2639.59 0.30548 92.4702 1178460.1622 108.651 3710.72 49 35.2012
1.266 5445.38 999.92 0.18362 50.0605 781739.229 70.5207 2860.39 60 40.2904
20.645 15685.9 4876.32 0.31087 154.885 2147957.1312 235.363 4378.35 95 30.5651
5.065 9901.3 3045.9 0.30762 101.882 1377338.1755 142.716 3849.37 34 34.5115
5.739 8696.18 2346.64 0.26984 100.202 1221278.6183 140.49 3388.49 112 36.2234
7.772 7570.13 2048.11 0.27055 66.6147 1018647.3047 93.3619 3328.53 33 39.0367
0.794 7121.76 2138.71 0.3003 75.7372 975683.2967 111.473 3062.84 80 36.7649
20.452 12324.2 4732.02 0.38396 79.4942 1652715.8246 190.652 4337.8 65 32.1366
11.825 10412.5 3249.72 0.31209 81.5587 1464828.6412 138.502 4476.3 68 33.0884
1.347 15935.8 4404.51 0.27639 188.91 2247375.3268 221.469 5729.15 68 23.1302
17.703 8862.88 4553.68 0.51379 68.5985 1306009.9832 135.995 4368.62 33 32.7133
14.927 6577.68 2930.26 0.44548 51.9108 938279.1908 107.428 2803.55 72 39.6022
14.547 9227.31 2915.54 0.31596 44.1419 1270136.8217 128.247 3770.08 22 35.6814
3.326 9852.27 2804.04 0.2846 92.949 1356710.0592 143.203 3579.67 19 37.0194
8.096 8542.09 2582.92 0.30237 77.9459 1147485.9272 103.059 3648.23 53 35.8038
15.986 7686.87 2519.94 0.32782 61.5514 1071062.7649 100.284 3664.67 15 36.9033
13.893 5927.81 3082.43 0.51999 61.4986 814381.42 103.56 2488.68 66 41.3909
14.643 9102.93 3696.53 0.40608 94.5807 1284824.911 139.303 3430.53 76 30.2068
19.424 10064.5 2918.12 0.28994 94.4828 1377602.3829 143.583 3569.24 36 35.4931
1.283 7326.09 2841.39 0.38784 65.2759 1068116.6569 102.448 3226.41 34 38.9338
1.853 12625.3 3151.55 0.24962 149.653 1750241.2155 197.252 4241.06 59 31.6586
15.073 8041.63 2763.75 0.34368 63.3554 1123176.876 107.865 3129.55 26 36.5358
6.533 4434.31 1240.47 0.27974 39.6605 607529.2232 60.7182 1449.88 9 44.3539
1.6 9626.85 2696.07 0.28005 103.772 1325311.1783 134.722 3575.32 122 35.9349
6.987 13585.9 4073.96 0.29986 174.709 1775345.5235 237.665 5400.98 71 26.5693
9.858 22242.6 6937.6 0.3119 250.023 3089188.8046 354.538 5938.95 236 24.2428
14.916 8090.14 2725.77 0.33692 68.3399 1205224.2556 95.2544 3024.22 67 37.8493
12.842 7574.97 3546.67 0.4682 67.4882 1116377.066 105.452 3798.09 30 38.9047
18.781 9440.47 3296.6 0.34919 87.0048 1277397.6934 146.424 3991.14 17 34.1492
10.782 5296.29 1886.2 0.35613 42.1141 769814.4344 81.7175 2387.65 45 43.1297
16.944 17500 5245.88 0.29976 175.512 2401406.9516 225.668 5517.77 72 24.9631
13.967 8817.35 3590.58 0.40721 79.1086 1194360.7043 142.581 4270.74 57 33.3099
15.903 7409.32 3041.03 0.41043 79.9988 979186.1911 124.913 3160.89 77 38.3046
14.975 5357.7 2188.45 0.40846 45.027 776730.5954 84.5764 2216.35 89 42.2634
14.208 11568.7 3568.52 0.30846 109.329 1562191.2886 175.344 4600.98 42 30.617
2.917 9776.6 2561.84 0.26203 105.247 1375487.5659 152.853 4008.9 42 32.708
10.046 10267.3 4083.49 0.39771 37.0565 1412599.9252 143.645 3831.67 66 38.2223
2.964 14139.3 4487.72 0.31739 198.215 1901451.0583 245.657 4584.18 65 28.9524
2.535 5915.62 1552.8 0.26249 45.8259 831188.8354 74.4138 2972.96 15 40.6692
3.191 23157.9 6886.31 0.29736 301.575 3227720.6309 370.235 6304.89 91 17.7233
8.389 16846 4885.28 0.28999 178.342 2322879.3238 225.398 5795.36 74 21.8376
2.861 6382.58 2498.16 0.3914 73.3037 875886.1977 86.7365 3222.48 32 40.467
4.336 8884.05 2658.19 0.2992 98.2171 1253462.1645 115.584 4143.52 109 33.1955
3.648 5811.16 1063.51 0.18301 51.5351 802537.6267 66.8505 3025.04 22 39.713
4.886 9743.96 3093.82 0.31751 93.456 1382779.5703 137.062 4068.44 106 33.4861
15.728 10463.7 3863.11 0.36919 95.2355 1466884.0608 121.999 4015.64 46 33.1526
2.654 5472.01 1430.64 0.26144 58.1587 721274.2203 81.7476 3508.44 17 40.1394
4.151 9804.46 3378.87 0.34462 86.7779 1403867.9532 142.252 3485.3 10 36.0084
2.957 8926.61 2248.1 0.25184 97.4284 1253465.006 130.433 3810.17 50 34.8653
2.255 5302.74 2241.14 0.42263 51.2297 734996.7564 79.2959 2246.31 24 42.7348
2.911 15028.8 3601.53 0.23964 214.448 2077005.1186 241.84 5009.19 126 26.7914
16.906 8781.76 3191.04 0.36337 90.5925 1256128.2541 118.852 5358.78 47 33.2739
11.287 4676.54 1678.14 0.35884 40.3103 640837.3184 64.5828 1406.51 15 43.7013
2.412 6241.54 1456.51 0.23335 70.3709 897340.6794 72.3631 3090.41 18 38.8019
1.977 5725.48 1647 0.28766 46.5207 799182.0139 74.6245 3101.47 16 40.3277
3.12 10201 2672.31 0.26196 115.89 1432531.38 149.931 4317.22 76 32.9141
1.563 8086.94 1965.44 0.24303 84.1461 1161217.0143 105.329 4048.69 95 34.951
5.333 13482.7 3422.08 0.25381 158.387 1876846.7901 210.343 4776.01 102 28.7323
19.533 9719.16 3029.1 0.31166 63.7114 1371512.0747 120.935 4194.96 69 36.3189
3.099 9380.99 2781.09 0.29646 101.184 1275116.8475 129.862 3937.27 28 34.5367
12.823 14359.9 4554.58 0.31717 124.243 2005315.4762 210.024 4837.4 76 29.3683
2.299 8333.23 2008.65 0.24104 85.4837 1183214.0013 103.553 3920.11 37 34.9422
1.7 10770 3302.21 0.30661 111.789 1535143.1587 129.794 3928.25 57 34.3883
2.931 7785.95 2120.45 0.27234 95.4813 1056934.3383 120.713 3894.17 38 35.9023
4.211 18217.9 5365.63 0.29452 248.957 2479826.1014 257.016 4939.51 260 26.5997
5.031 11837.4 3718.5 0.31413 117.824 1685521.3631 169.069 4383.58 151 31.938
15.292 8186.03 2340.76 0.28594 67.7341 1163071.6816 101.333 3156.07 37 34.9032
9.256 12822.8 3072.39 0.2396 151.159 1836371.9891 191.982 5078.14 74 27.0473
14.724 7711.84 2854.2 0.3701 76.2863 1100810.307 108.655 4086 52 34.7121
2.389 16922.8 5982 0.35348 185.166 2362715.0269 285.703 5356.34 158 23.0878
20.126 11943.1 4288.84 0.3591 114.378 1624104.3955 175.374 5650.55 113 26.6838
16.251 12496.9 5517.44 0.4415 103.576 1736795.532 198.306 4273.89 45 32.5404
3.776 9928.39 2696.21 0.27156 98.0019 1402219.3373 140.131 3642.41 118 35.8134
2.847 8502.43 2289.37 0.26926 103.018 1150740.0706 140.083 4026.88 103 33.3721
11.854 5546.93 1669.01 0.30088 50.3509 781969.6723 73.4788 2461.72 98 41.4035
17.131 13978 4314.64 0.30867 158.701 1909332.3502 208.029 5034.57 13 31.1143
1.612 7604.32 1918.7 0.25231 87.9115 1065336.9391 105.228 3820.87 26 36.3317
3.711 11787.5 3996.57 0.33905 110.569 1670639.0057 180.267 4447.65 61 31.7511
13.61 6873.24 1940.63 0.28234 68.2094 948331.5347 94.7766 2846.58 29 39.6532
11.467 7596.63 1702.19 0.22407 73.7609 1065037.0972 88.5998 3240.61 34 37.211
1.649 9193.02 2005.09 0.21811 98.6586 1282244.0784 135.639 3651.33 21 34.0474
2.546 11104.7 2883.74 0.25968 148.197 1599052.5651 157.29 4113.19 130 32.4409
1.184 6355.44 1990.6 0.31321 55.7306 881189.4258 92.5597 3386.78 73 36.7848
3.365 16051.9 5226.27 0.32558 116.357 2261857.8829 228.116 8206.13 98 30.3836
2.412 9269.87 2697.68 0.29101 87.8 1317155.6728 131.644 3461.73 5 35.594
18.605 18774.6 7032.03 0.37455 122.888 2663821.3889 269.487 10254.11 91 27.8703
1.541 6203.16 2008.9 0.32385 54.6256 857229.4552 92.6838 2766.45 38 40.0523
3.647 23536.6 6881.37 0.29236 320.376 3237285.4805 358.227 6313.48 93 16.9569
15.935 8080.72 2294.07 0.28389 64.3237 1117577.727 115.035 3872.14 63 36.65
1.749 9604.09 2629.07 0.27374 108.558 1358491.8518 146.008 3890.23 34 33.5723
11.738 4991.43 1970.54 0.39478 46.4704 715236.9454 73.3477 2526.24 57 42.3761
6.713 6026.61 1451.35 0.24082 68.1605 842172.813 74.1767 2867.51 69 39.3343
0.786 12224.5 2282.47 0.18671 155.628 1660120.668 185.844 4860.67 137 29.8454
7.564 6210.45 1451.63 0.23373 53.3676 859667.8847 87.0602 2951.33 3 37.688
12.814 7450.79 2068.91 0.27767 63.0221 1025716.4873 96.3241 4002.75 68 36.6065
6.921 9382.33 1977.24 0.21074 77.0755 1259923.251 118.019 3841.56 32 37.3693
0.601 8522.1 2100.21 0.24644 103.663 1188888.911 121.871 3232.69 4 36.9374
15.676 8915.16 3809.07 0.42725 61.6404 1279513.3184 137.843 3233.16 32 37.4584
14.588 5803.24 1600.7 0.27582 49.18 750914.9308 77.64 2351.75 29 46.5464
1.985 12771.2 3156.29 0.24714 157.61 1783783.0965 215.908 4944.45 195 26.9874
4.841 9196.63 2722.02 0.29598 79.4848 1278710.1842 114.914 4407.36 64 34.214
0.884 11375.5 2253.44 0.19809 137.15 1615215.0489 179.274 4536.52 49 30.4706
18.172 9098.67 3265.63 0.35891 73.534 1252087.5857 120.839 4823.17 29 37.3643
1.86 9237.11 2008.8 0.21747 109.189 1265475.2224 143.898 3992.22 40 31.4924
2.126 17625.9 5482.29 0.31103 225.905 2433124.3891 288.853 5731.64 199 21.8717
9.211 13359.4 4933.63 0.3693 158.436 1882759.4933 195.76 5240.2 40 28.0694
18.071 9817.35 4095.79 0.41719 76.9922 1420072.1455 145.858 5176.34 88 30.1543
4.792 7451.82 1949.33 0.26159 72.7441 1009156.902 96.7606 3712.73 36 35.5491
14.506 7438.43 2005.69 0.26963 58.4596 1057366.3558 93.0305 2648.77 11 39.3718
2.283 12570.8 3380.39 0.2689 151.238 1787056.9002 167.856 4763.86 33 28.7202
6.997 6210.83 863.11 0.13896 56.9115 866892.522 78.3314 2620.7 48 39.7503
15.464 6935.2 2514.14 0.36251 66.2475 947136.7986 100.202 3550.01 54 36.5085
17.927 7724.57 1516.18 0.19628 88.6143 1052654.897 99.6242 4054.31 46 28.1783
16.772 9738.9 2088.23 0.21442 95.9377 1370631.7218 118.862 3814.19 54 34.375
3.114 5029.07 1114.55 0.22162 44.6535 717408.9799 63.6397 2704.27 15 41.3887
18.292 10349.4 3902.83 0.3771 86.7552 1402023.4245 164.121 4232.27 13 33.5447
15.147 5652.75 2096.42 0.37086 67.0713 764209.198 102.549 3617.67 72 37.2139
1.834 7808.27 1485.92 0.1903 71.1075 1096560.1252 103.555 3728.14 12 34.4036
1.809 6214.99 1988.95 0.32002 60.6722 864752.0143 90.6314 2677.54 41 40.6027
15.8 10654.3 4676.97 0.43897 97.6534 1500245.8915 157.791 3949.86 40 33.6555
3.034 3481.81 1154.35 0.33153 23.9587 473346.9711 40.066 1381.74 3 45.4289
5.605 4250.34 1144.03 0.26916 45.9431 545863.8325 65.3697 1993.48 34 43.6822
19.446 9917.02 3190.39 0.3217 66.3956 1363836.6959 128.917 3773.66 91 34.8776
15.348 11091.6 5219.38 0.47057 88.981 1579818.724 174.532 4096.16 68 37.0845
2.633 10550.1 3462.44 0.32819 119.056 1434608.906 171.62 3747.8 32 34.2956
3.808 10435.3 2710.98 0.25978 117.728 1459353.0174 151.332 4331.79 53 32.9962
13.77 12720.9 4843.79 0.38077 85.0802 1781229.0621 184.13 4019.2 38 34.8854
10.906 4832.22 1176.96 0.24356 38.085 658629.1299 58.3347 2593.77 54 41.9338
3.296 6105.47 1278.41 0.20938 72.1403 833698.5106 76.7126 3009.34 28 38.265
2.413 9331.2 3444.64 0.36915 98.0031 1320998.2313 136.682 3686.11 16 35.1968
0.748 9955.35 2687.06 0.26991 95.4799 1355809.4326 170.689 4303.3 75 32.7874
5.883 10730.3 3261.72 0.30397 106.339 1514760.1049 143.564 4088.93 30 33.6481
4.558 16722.8 3837.59 0.22948 253.318 2278950.6978 260.874 4814.1 274 27.5301
11.93 18085.1 4204.79 0.2325 167.804 2594570.3708 196.553 4859.62 107 28.1888
10.658 4067.09 1025.68 0.25219 35.9943 567634.5868 51.837 1755.26 41 44.7778
3.062 10672.9 3051.33 0.28589 127.386 1519278.4226 164.678 4404.85 41 32.0452
18.719 10749.6 3587.2 0.3337 111.181 1461402.6478 162.008 4490.28 129 32.0215
18.294 7750.39 1596.58 0.20599 65.637 1089871.533 85.588 2880.44 42 39.7799
1.142 6777.58 2366.16 0.34911 60.8755 932674.8365 103.96 3880.75 73 35.9365
12.526 10216.6 4189.64 0.41008 98.8965 1442847.4192 144.65 3570.87 54 37.0367
20.435 22615.4 8822.78 0.39012 179.652 3083703.0194 342.898 5442.64 94 29.9522
1.57 4623.29 1529.03 0.33072 34.8264 659090.5141 52.5972 1707.61 39 42.7225
2.007 8826.21 2440.86 0.27654 81.857 1233588.0292 107.487 4243.46 61 34.1307
19.429 8765.42 3723.74 0.42482 69.4996 1248309.1415 122.524 4532.91 72 34.0273
1.303 14527.8 2691.81 0.18528 176.877 2028984.4866 226.276 4685.18 26 28.5746
14.683 7649.79 2697.12 0.35257 83.3653 1069238.1123 105.173 3866.34 91 38.4881
2.135 14618.9 5371.56 0.36743 178.712 2043569.6614 250.896 4426.33 33 26.5613
13.286 6203.06 2321.63 0.37427 53.2993 869723.5372 101.815 2556.44 89 40.5206
17.77 10726.3 4094.63 0.38173 88.7574 1506560.3413 168.558 3868.72 28 35.3258
16.718 9625.16 2833.16 0.29434 95.7127 1349635.9292 121.628 3381.76 68 35.1949
16.662 11005.6 3747.74 0.34053 99.5956 1541007.9506 142.127 4770.49 114 30.4456
20.432 8686.11 2492.33 0.28693 92.1176 1203405.109 120.101 3834.73 103 34.8486
14.148 9005.05 3142.66 0.34898 106.681 1259372.4363 138.385 4194.01 61 31.8519
7.431 9626.56 2299.34 0.23885 86.0977 1360820.1625 119.19 3923.65 154 31.2276
2.206 8163.52 2155.35 0.26402 79.6137 1163035.1412 106.347 3925.11 38 35.09
1.792 9876.24 2715.26 0.27492 109.589 1405355.5231 147.332 4003.53 45 33.4605
1.38 9221.15 2023.41 0.21943 98.3928 1295064.8467 137.725 3666.99 23 33.9873
2.904 12571.8 3180.4 0.25297 162.765 1740899.9735 198.823 4814.04 67 28.1746
0.576 10657.7 2623.38 0.24614 132.447 1479465.1505 167.879 4700.28 172 28.6155
1.614 10970.6 3133.03 0.28558 132.447 1527432.2869 166.765 4661.39 69 29.8276
1.75 8066.78 2420.62 0.30007 91.7958 1091861.7342 114.548 3241.82 80 38.6289
11.031 5941.57 2867.64 0.48264 57.9143 844339.8575 88.2454 2720.47 54 40.4738
14.402 7316.51 2488.93 0.34017 60.1281 1003991.1743 97.2639 3393.4 45 37.564
3.882 5307.39 1414.06 0.26643 62.3094 706311.3919 79.6323 2714.28 29 40.8641
7.937 15053.3 4964.76 0.32981 181.319 2087553.0048 269.994 5199.48 102 26.6754
4.085 9666.52 3657.68 0.37838 92.4646 1355616.1493 156.358 3816.46 89 33.3911
4.752 15360.4 4593.46 0.29904 194.257 2046546.8797 255.53 5049.48 156 26.742
2.72 6850.85 2231.67 0.32575 64.585 898259.1509 106.705 2672.04 27 38.5638
2.318 5761.34 1489.55 0.25854 68.2507 724435.6152 85.4152 3102.27 23 39.4046
6.474 16252.3 4643.21 0.28569 177.889 2225383.5985 277.892 5304.48 91 23.7376
3.635 11852.8 3767.52 0.31785 115.452 1702348.7166 189.494 4483.32 22 32.4703
14.581 11263.9 4238.17 0.37626 83.185 1599149.0553 151.457 4312.82 56 33.8624
2.313 17645.7 5880.87 0.33327 201.773 2378712.3287 297.005 5438.72 208 24.1394
9.464 4163.7 1245.19 0.29905 30.5471 588312.9024 51.0634 2022.42 51 44.6001
2.711 19400.2 6521.73 0.33616 251.515 2634324.9341 331.635 5692.24 330 21.5156
3.803 5873.98 1748.72 0.2977 66.4195 774859.304 79.4381 3484.92 57 38.5882
8.358 8462.9 2483.65 0.29347 63.6643 1166959.3473 115.112 3250.83 39 40.2637
8.761 6159.84 1520.03 0.24676 61.8027 848626.8187 82.8843 3102.39 51 39.3068
1.971 6226.13 1515.37 0.24338 68.1948 884283.0517 74.1102 3093.85 14 37.9759
13.464 7907.5 2097.36 0.26523 65.1618 1141235.2587 93.7613 2589.47 50 40.5505
14.233 9598.8 3202.89 0.33367 79.4434 1324090.8023 131.711 3673.35 114 35.8678
13.741 7789.67 1903.41 0.24435 85.2368 1063743.2993 113.548 3422.26 2 46.5464
14.342 12211.7 3319.1 0.27179 110.237 1735813.0437 161.921 3957.61 17 34.4526
18.437 12078.4 3896.37 0.32258 125.008 1728136.657 170.327 4819.62 51 46.5464
11.822 6321.89 2502.13 0.39578 39.3454 864452.8626 104.271 1842.72 7 42.8029
20.653 13673.8 4667.62 0.34135 165.542 1907610.1727 215.832 4923.23 171 28.7678
3.026 12930.9 3475.83 0.2688 139.144 1749010.019 173.403 4100.43 183 31.6423
5.835 10239.7 3100.52 0.30279 90.303 1445020.011 139.622 4074.26 76 33.429
9.902 6207.64 2011.92 0.3241 60.3985 823397.4571 92.8212 2875.42 33 38.8062
3.035 9620.91 2800.33 0.29106 115.7 1358738.8845 160.421 4096.27 54 33.9442
3.175 11682.1 3587.79 0.30711 140.255 1597869.9974 179.919 4479.34 86 31.3151
[truncated: 3,128,725 more chars]
