# Supplementary material
Source: ML conference proceedings conference paper supplement (https://proceedings.mlr.press/v108/ishibashi20a.html)
Supplement: Supplementary file 2 [file ishibashi20a-supp.zip › 137_supp/program/dataset/yacht/hydro.txt]

-2.3 0.568 4.78 3.99 3.17 0.125 0.11
-2.3 0.568 4.78 3.99 3.17 0.150 0.27
-2.3 0.568 4.78 3.99 3.17 0.175 0.47
-2.3 0.568 4.78 3.99 3.17 0.200 0.78
-2.3 0.568 4.78 3.99 3.17 0.225 1.18
-2.3 0.568 4.78 3.99 3.17 0.250 1.82
-2.3 0.568 4.78 3.99 3.17 0.275 2.61
-2.3 0.568 4.78 3.99 3.17 0.300 3.76
-2.3 0.568 4.78 3.99 3.17 0.325 4.99
-2.3 0.568 4.78 3.99 3.17 0.350 7.16
-2.3 0.568 4.78 3.99 3.17 0.375 11.93
-2.3 0.568 4.78 3.99 3.17 0.400 20.11
-2.3 0.568 4.78 3.99 3.17 0.425 32.75
-2.3 0.568 4.78 3.99 3.17 0.450 49.49
-2.3 0.569 4.78 3.04 3.64 0.125 0.04
-2.3 0.569 4.78 3.04 3.64 0.150 0.17
-2.3 0.569 4.78 3.04 3.64 0.175 0.37
-2.3 0.569 4.78 3.04 3.64 0.200 0.66
-2.3 0.569 4.78 3.04 3.64 0.225 1.06
-2.3 0.569 4.78 3.04 3.64 0.250 1.59
-2.3 0.569 4.78 3.04 3.64 0.275 2.33
-2.3 0.569 4.78 3.04 3.64 0.300 3.29
-2.3 0.569 4.78 3.04 3.64 0.325 4.61
-2.3 0.569 4.78 3.04 3.64 0.350 7.11
-2.3 0.569 4.78 3.04 3.64 0.375 11.99
-2.3 0.569 4.78 3.04 3.64 0.400 21.09
-2.3 0.569 4.78 3.04 3.64 0.425 35.01
-2.3 0.569 4.78 3.04 3.64 0.450 51.80
-2.3 0.565 4.78 5.35 2.76 0.125 0.09
-2.3 0.565 4.78 5.35 2.76 0.150 0.29
-2.3 0.565 4.78 5.35 2.76 0.175 0.56
-2.3 0.565 4.78 5.35 2.76 0.200 0.86
-2.3 0.565 4.78 5.35 2.76 0.225 1.31
-2.3 0.565 4.78 5.35 2.76 0.250 1.99
-2.3 0.565 4.78 5.35 2.76 0.275 2.94
-2.3 0.565 4.78 5.35 2.76 0.300 4.21
-2.3 0.565 4.78 5.35 2.76 0.325 5.54
-2.3 0.565 4.78 5.35 2.76 0.350 8.25
-2.3 0.565 4.78 5.35 2.76 0.375 13.08
-2.3 0.565 4.78 5.35 2.76 0.400 21.40
-2.3 0.565 4.78 5.35 2.76 0.425 33.14
-2.3 0.565 4.78 5.35 2.76 0.450 50.14
-2.3 0.564 5.10 3.95 3.53 0.125 0.20
-2.3 0.564 5.10 3.95 3.53 0.150 0.35
-2.3 0.564 5.10 3.95 3.53 0.175 0.65
-2.3 0.564 5.10 3.95 3.53 0.200 0.93
-2.3 0.564 5.10 3.95 3.53 0.225 1.37
-2.3 0.564 5.10 3.95 3.53 0.250 1.97
-2.3 0.564 5.10 3.95 3.53 0.275 2.83
-2.3 0.564 5.10 3.95 3.53 0.300 3.99
-2.3 0.564 5.10 3.95 3.53 0.325 5.19
-2.3 0.564 5.10 3.95 3.53 0.350 8.03
-2.3 0.564 5.10 3.95 3.53 0.375 12.86
-2.3 0.564 5.10 3.95 3.53 0.400 21.51
-2.3 0.564 5.10 3.95 3.53 0.425 33.97
-2.3 0.564 5.10 3.95 3.53 0.450 50.36
-2.4 0.574 4.36 3.96 2.76 0.125 0.20
-2.4 0.574 4.36 3.96 2.76 0.150 0.35
-2.4 0.574 4.36 3.96 2.76 0.175 0.65
-2.4 0.574 4.36 3.96 2.76 0.200 0.93
-2.4 0.574 4.36 3.96 2.76 0.225 1.37
-2.4 0.574 4.36 3.96 2.76 0.250 1.97
-2.4 0.574 4.36 3.96 2.76 0.275 2.83
-2.4 0.574 4.36 3.96 2.76 0.300 3.99
-2.4 0.574 4.36 3.96 2.76 0.325 5.19
-2.4 0.574 4.36 3.96 2.76 0.350 8.03
-2.4 0.574 4.36 3.96 2.76 0.375 12.86
-2.4 0.574 4.36 3.96 2.76 0.400 21.51
-2.4 0.574 4.36 3.96 2.76 0.425 33.97
-2.4 0.574 4.36 3.96 2.76 0.450 50.36
-2.4 0.568 4.34 2.98 3.15 0.125 0.12
-2.4 0.568 4.34 2.98 3.15 0.150 0.26
-2.4 0.568 4.34 2.98 3.15 0.175 0.43
-2.4 0.568 4.34 2.98 3.15 0.200 0.69
-2.4 0.568 4.34 2.98 3.15 0.225 1.09
-2.4 0.568 4.34 2.98 3.15 0.250 1.67
-2.4 0.568 4.34 2.98 3.15 0.275 2.46
-2.4 0.568 4.34 2.98 3.15 0.300 3.43
-2.4 0.568 4.34 2.98 3.15 0.325 4.62
-2.4 0.568 4.34 2.98 3.15 0.350 6.86
-2.4 0.568 4.34 2.98 3.15 0.375 11.56
-2.4 0.568 4.34 2.98 3.15 0.400 20.63
-2.4 0.568 4.34 2.98 3.15 0.425 34.50
-2.4 0.568 4.34 2.98 3.15 0.450 54.23
-2.3 0.562 5.14 4.95 3.17 0.125 0.28
-2.3 0.562 5.14 4.95 3.17 0.150 0.44
-2.3 0.562 5.14 4.95 3.17 0.175 0.70
-2.3 0.562 5.14 4.95 3.17 0.200 1.07
-2.3 0.562 5.14 4.95 3.17 0.225 1.57
-2.3 0.562 5.14 4.95 3.17 0.250 2.23
-2.3 0.562 5.14 4.95 3.17 0.275 3.09
-2.3 0.562 5.14 4.95 3.17 0.300 4.09
-2.3 0.562 5.14 4.95 3.17 0.325 5.82
-2.3 0.562 5.14 4.95 3.17 0.350 8.28
-2.3 0.562 5.14 4.95 3.17 0.375 12.80
-2.3 0.562 5.14 4.95 3.17 0.400 20.41
-2.3 0.562 5.14 4.95 3.17 0.425 32.34
-2.3 0.562 5.14 4.95 3.17 0.450 47.29
-2.4 0.585 4.78 3.84 3.32 0.125 0.20
-2.4 0.585 4.78 3.84 3.32 0.150 0.38
-2.4 0.585 4.78 3.84 3.32 0.175 0.64
-2.4 0.585 4.78 3.84 3.32 0.200 0.97
-2.4 0.585 4.78 3.84 3.32 0.225 1.36
-2.4 0.585 4.78 3.84 3.32 0.250 1.98
-2.4 0.585 4.78 3.84 3.32 0.275 2.91
-2.4 0.585 4.78 3.84 3.32 0.300 4.35
-2.4 0.585 4.78 3.84 3.32 0.325 5.79
-2.4 0.585 4.78 3.84 3.32 0.350 8.04
-2.4 0.585 4.78 3.84 3.32 0.375 12.15
-2.4 0.585 4.78 3.84 3.32 0.400 19.18
-2.4 0.585 4.78 3.84 3.32 0.425 30.09
-2.4 0.585 4.78 3.84 3.32 0.450 44.38
-2.2 0.546 4.78 4.13 3.07 0.125 0.15 
-2.2 0.546 4.78 4.13 3.07 0.150 0.32
-2.2 0.546 4.78 4.13 3.07 0.175 0.55
-2.2 0.546 4.78 4.13 3.07 0.200 0.86
-2.2 0.546 4.78 4.13 3.07 0.225 1.24
-2.2 0.546 4.78 4.13 3.07 0.250 1.76
-2.2 0.546 4.78 4.13 3.07 0.275 2.49
-2.2 0.546 4.78 4.13 3.07 0.300 3.45
-2.2 0.546 4.78 4.13 3.07 0.325 4.83
-2.2 0.546 4.78 4.13 3.07 0.350 7.37
-2.2 0.546 4.78 4.13 3.07 0.375 12.76
-2.2 0.546 4.78 4.13 3.07 0.400 21.99
-2.2 0.546 4.78 4.13 3.07 0.425 35.64
-2.2 0.546 4.78 4.13 3.07 0.450 53.07
0.0  0.565 4.77 3.99 3.15 0.125 0.11
0.0  0.565 4.77 3.99 3.15 0.150 0.24
0.0  0.565 4.77 3.99 3.15 0.175 0.49
0.0  0.565 4.77 3.99 3.15 0.200 0.79
0.0  0.565 4.77 3.99 3.15 0.225 1.28
0.0  0.565 4.77 3.99 3.15 0.250 1.96
0.0  0.565 4.77 3.99 3.15 0.275 2.88
0.0  0.565 4.77 3.99 3.15 0.300 4.14
0.0  0.565 4.77 3.99 3.15 0.325 5.96
0.0  0.565 4.77 3.99 3.15 0.350 9.07
0.0  0.565 4.77 3.99 3.15 0.375 14.93
0.0  0.565 4.77 3.99 3.15 0.400 24.13
0.0  0.565 4.77 3.99 3.15 0.425 38.12
0.0  0.565 4.77 3.99 3.15 0.450 55.44
-5.0 0.565 4.77 3.99 3.15 0.125 0.07
-5.0 0.565 4.77 3.99 3.15 0.150 0.18
-5.0 0.565 4.77 3.99 3.15 0.175 0.40
-5.0 0.565 4.77 3.99 3.15 0.200 0.70
-5.0 0.565 4.77 3.99 3.15 0.225 1.14
-5.0 0.565 4.77 3.99 3.15 0.250 1.83
-5.0 0.565 4.77 3.99 3.15 0.275 2.77
-5.0 0.565 4.77 3.99 3.15 0.300 4.12
-5.0 0.565 4.77 3.99 3.15 0.325 5.41
-5.0 0.565 4.77 3.99 3.15 0.350 7.87
-5.0 0.565 4.77 3.99 3.15 0.375 12.71
-5.0 0.565 4.77 3.99 3.15 0.400 21.02
-5.0 0.565 4.77 3.99 3.15 0.425 34.58
-5.0 0.565 4.77 3.99 3.15 0.450 51.77
0.0  0.565 5.10 3.94 3.51 0.125 0.08
0.0  0.565 5.10 3.94 3.51 0.150 0.26
0.0  0.565 5.10 3.94 3.51 0.175 0.50
0.0  0.565 5.10 3.94 3.51 0.200 0.83
0.0  0.565 5.10 3.94 3.51 0.225 1.28
0.0  0.565 5.10 3.94 3.51 0.250 1.90
0.0  0.565 5.10 3.94 3.51 0.275 2.68
0.0  0.565 5.10 3.94 3.51 0.300 3.76
0.0  0.565 5.10 3.94 3.51 0.325 5.57
0.0  0.565 5.10 3.94 3.51 0.350 8.76
0.0  0.565 5.10 3.94 3.51 0.375 14.24
0.0  0.565 5.10 3.94 3.51 0.400 23.05
0.0  0.565 5.10 3.94 3.51 0.425 35.46
0.0  0.565 5.10 3.94 3.51 0.450 51.99
-5.0 0.565 5.10 3.94 3.51 0.125 0.08
-5.0 0.565 5.10 3.94 3.51 0.150 0.24
-5.0 0.565 5.10 3.94 3.51 0.175 0.45
-5.0 0.565 5.10 3.94 3.51 0.200 0.77
-5.0 0.565 5.10 3.94 3.51 0.225 1.19
-5.0 0.565 5.10 3.94 3.51 0.250 1.76
-5.0 0.565 5.10 3.94 3.51 0.275 2.59
-5.0 0.565 5.10 3.94 3.51 0.300 3.85
-5.0 0.565 5.10 3.94 3.51 0.325 5.27
-5.0 0.565 5.10 3.94 3.51 0.350 7.74
-5.0 0.565 5.10 3.94 3.51 0.375 12.40
-5.0 0.565 5.10 3.94 3.51 0.400 20.91
-5.0 0.565 5.10 3.94 3.51 0.425 33.23
-5.0 0.565 5.10 3.94 3.51 0.450 49.14
-2.3 0.530 5.11 3.69 3.51 0.125 0.08
-2.3 0.530 5.11 3.69 3.51 0.150 0.25
-2.3 0.530 5.11 3.69 3.51 0.175 0.46
-2.3 0.530 5.11 3.69 3.51 0.200 0.75
-2.3 0.530 5.11 3.69 3.51 0.225 1.11
-2.3 0.530 5.11 3.69 3.51 0.250 1.57
-2.3 0.530 5.11 3.69 3.51 0.275 2.17
-2.3 0.530 5.11 3.69 3.51 0.300 2.98
-2.3 0.530 5.11 3.69 3.51 0.325 4.42
-2.3 0.530 5.11 3.69 3.51 0.350 7.84
-2.3 0.530 5.11 3.69 3.51 0.375 14.11
-2.3 0.530 5.11 3.69 3.51 0.400 24.14
-2.3 0.530 5.11 3.69 3.51 0.425 37.95
-2.3 0.530 5.11 3.69 3.51 0.450 55.17
-2.3 0.530 4.76 3.68 3.16 0.125 0.10
-2.3 0.530 4.76 3.68 3.16 0.150 0.23
-2.3 0.530 4.76 3.68 3.16 0.175 0.47
-2.3 0.530 4.76 3.68 3.16 0.200 0.76
-2.3 0.530 4.76 3.68 3.16 0.225 1.15
-2.3 0.530 4.76 3.68 3.16 0.250 1.65
-2.3 0.530 4.76 3.68 3.16 0.275 2.28
-2.3 0.530 4.76 3.68 3.16 0.300 3.09
-2.3 0.530 4.76 3.68 3.16 0.325 4.41
-2.3 0.530 4.76 3.68 3.16 0.350 7.51
-2.3 0.530 4.76 3.68 3.16 0.375 13.77
-2.3 0.530 4.76 3.68 3.16 0.400 23.96
-2.3 0.530 4.76 3.68 3.16 0.425 37.38
-2.3 0.530 4.76 3.68 3.16 0.450 56.46
-2.3 0.530 4.34 2.81 3.15 0.125 0.05
-2.3 0.530 4.34 2.81 3.15 0.150 0.17
-2.3 0.530 4.34 2.81 3.15 0.175 0.35
-2.3 0.530 4.34 2.81 3.15 0.200 0.63
-2.3 0.530 4.34 2.81 3.15 0.225 1.01
-2.3 0.530 4.34 2.81 3.15 0.250 1.43
-2.3 0.530 4.34 2.81 3.15 0.275 2.05
-2.3 0.530 4.34 2.81 3.15 0.300 2.73
-2.3 0.530 4.34 2.81 3.15 0.325 3.87
-2.3 0.530 4.34 2.81 3.15 0.350 7.19
-2.3 0.530 4.34 2.81 3.15 0.375 13.96
-2.3 0.530 4.34 2.81 3.15 0.400 25.18
-2.3 0.530 4.34 2.81 3.15 0.425 41.34
-2.3 0.530 4.34 2.81 3.15 0.450 62.42
0.0  0.600 4.78 4.24 3.15 0.125 0.03
0.0  0.600 4.78 4.24 3.15 0.150 0.18
0.0  0.600 4.78 4.24 3.15 0.175 0.40
0.0  0.600 4.78 4.24 3.15 0.200 0.73
0.0  0.600 4.78 4.24 3.15 0.225 1.30
0.0  0.600 4.78 4.24 3.15 0.250 2.16
0.0  0.600 4.78 4.24 3.15 0.275 3.35
0.0  0.600 4.78 4.24 3.15 0.300 5.06
0.0  0.600 4.78 4.24 3.15 0.325 7.14
0.0  0.600 4.78 4.24 3.15 0.350 10.36
0.0  0.600 4.78 4.24 3.15 0.375 15.25
0.0  0.600 4.78 4.24 3.15 0.400 23.15
0.0  0.600 4.78 4.24 3.15 0.425 34.62
0.0  0.600 4.78 4.24 3.15 0.450 51.50
-5.0 0.600 4.78 4.24 3.15 0.125 0.06
-5.0 0.600 4.78 4.24 3.15 0.150 0.15
-5.0 0.600 4.78 4.24 3.15 0.175 0.34
-5.0 0.600 4.78 4.24 3.15 0.200 0.63
-5.0 0.600 4.78 4.24 3.15 0.225 1.13
-5.0 0.600 4.78 4.24 3.15 0.250 1.85
-5.0 0.600 4.78 4.24 3.15 0.275 2.84
-5.0 0.600 4.78 4.24 3.15 0.300 4.34
-5.0 0.600 4.78 4.24 3.15 0.325 6.20
-5.0 0.600 4.78 4.24 3.15 0.350 8.62
-5.0 0.600 4.78 4.24 3.15 0.375 12.49
-5.0 0.600 4.78 4.24 3.15 0.400 20.41
-5.0 0.600 4.78 4.24 3.15 0.425 32.46
-5.0 0.600 4.78 4.24 3.15 0.450 50.94
0.0  0.530 4.78 3.75 3.15 0.125 0.16
0.0  0.530 4.78 3.75 3.15 0.150 0.32
0.0  0.530 4.78 3.75 3.15 0.175 0.59
0.0  0.530 4.78 3.75 3.15 0.200 0.92
0.0  0.530 4.78 3.75 3.15 0.225 1.37
0.0  0.530 4.78 3.75 3.15 0.250 1.94
0.0  0.530 4.78 3.75 3.15 0.275 2.62
0.0  0.530 4.78 3.75 3.15 0.300 3.70
0.0  0.530 4.78 3.75 3.15 0.325 5.45
0.0  0.530 4.78 3.75 3.15 0.350 9.45
0.0  0.530 4.78 3.75 3.15 0.375 16.31
0.0  0.530 4.78 3.75 3.15 0.400 27.34
0.0  0.530 4.78 3.75 3.15 0.425 41.77
0.0  0.530 4.78 3.75 3.15 0.450 60.85
-5.0 0.530 4.78 3.75 3.15 0.125 0.09
-5.0 0.530 4.78 3.75 3.15 0.150 0.24
-5.0 0.530 4.78 3.75 3.15 0.175 0.47
-5.0 0.530 4.78 3.75 3.15 0.200 0.78
-5.0 0.530 4.78 3.75 3.15 0.225 1.21
-5.0 0.530 4.78 3.75 3.15 0.250 1.85
-5.0 0.530 4.78 3.75 3.15 0.275 2.62
-5.0 0.530 4.78 3.75 3.15 0.300 3.69
-5.0 0.530 4.78 3.75 3.15 0.325 5.07
-5.0 0.530 4.78 3.75 3.15 0.350 7.95
-5.0 0.530 4.78 3.75 3.15 0.375 13.73
-5.0 0.530 4.78 3.75 3.15 0.400 23.55
-5.0 0.530 4.78 3.75 3.15 0.425 37.14
-5.0 0.530 4.78 3.75 3.15 0.450 55.87
-2.3 0.600 5.10 4.17 3.51 0.125 0.01
-2.3 0.600 5.10 4.17 3.51 0.150 0.16
-2.3 0.600 5.10 4.17 3.51 0.175 0.39
-2.3 0.600 5.10 4.17 3.51 0.200 0.73
-2.3 0.600 5.10 4.17 3.51 0.225 1.24
-2.3 0.600 5.10 4.17 3.51 0.250 1.96
-2.3 0.600 5.10 4.17 3.51 0.275 3.04
-2.3 0.600 5.10 4.17 3.51 0.300 4.46
-2.3 0.600 5.10 4.17 3.51 0.325 6.31
-2.3 0.600 5.10 4.17 3.51 0.350 8.68
-2.3 0.600 5.10 4.17 3.51 0.375 12.39
-2.3 0.600 5.10 4.17 3.51 0.400 20.14
-2.3 0.600 5.10 4.17 3.51 0.425 31.77
-2.3 0.600 5.10 4.17 3.51 0.450 47.13
-2.3 0.600 4.34 4.23 2.73 0.125 0.04
-2.3 0.600 4.34 4.23 2.73 0.150 0.17
-2.3 0.600 4.34 4.23 2.73 0.175 0.36
-2.3 0.600 4.34 4.23 2.73 0.200 0.64
-2.3 0.600 4.34 4.23 2.73 0.225 1.02
-2.3 0.600 4.34 4.23 2.73 0.250 1.62
-2.3 0.600 4.34 4.23 2.73 0.275 2.63
-2.3 0.600 4.34 4.23 2.73 0.300 4.15
-2.3 0.600 4.34 4.23 2.73 0.325 6.00
-2.3 0.600 4.34 4.23 2.73 0.350 8.47
-2.3 0.600 4.34 4.23 2.73 0.375 12.27
-2.3 0.600 4.34 4.23 2.73 0.400 19.59
-2.3 0.600 4.34 4.23 2.73 0.425 30.48
-2.3 0.600 4.34 4.23 2.73 0.450 46.66
