# Supplementary material
Source: ML conference proceedings conference paper supplement (https://proceedings.mlr.press/v108/ishibashi20a.html)
Supplement: Supplementary file 2 [file ishibashi20a-supp.zip › 137_supp/program/results/airfoil/e_stop_airfoil.txt]

[36.82 36.82 36.82 ... 46.54 46.55 46.55] \pm 1.73
