# Supplementary material
Source: ML conference proceedings conference paper supplement (https://proceedings.mlr.press/v108/ishibashi20a.html)
Supplement: Supplementary file 2 [file ishibashi20a-supp.zip › 137_supp/program/results/best_threshhold.txt]

1.655000000000000071e+01
3.386000000000000121e+00
3.531000000000000250e-01
