# Supplementary material
Source: ML conference proceedings conference paper supplement (https://proceedings.mlr.press/v108/ishibashi20a.html)

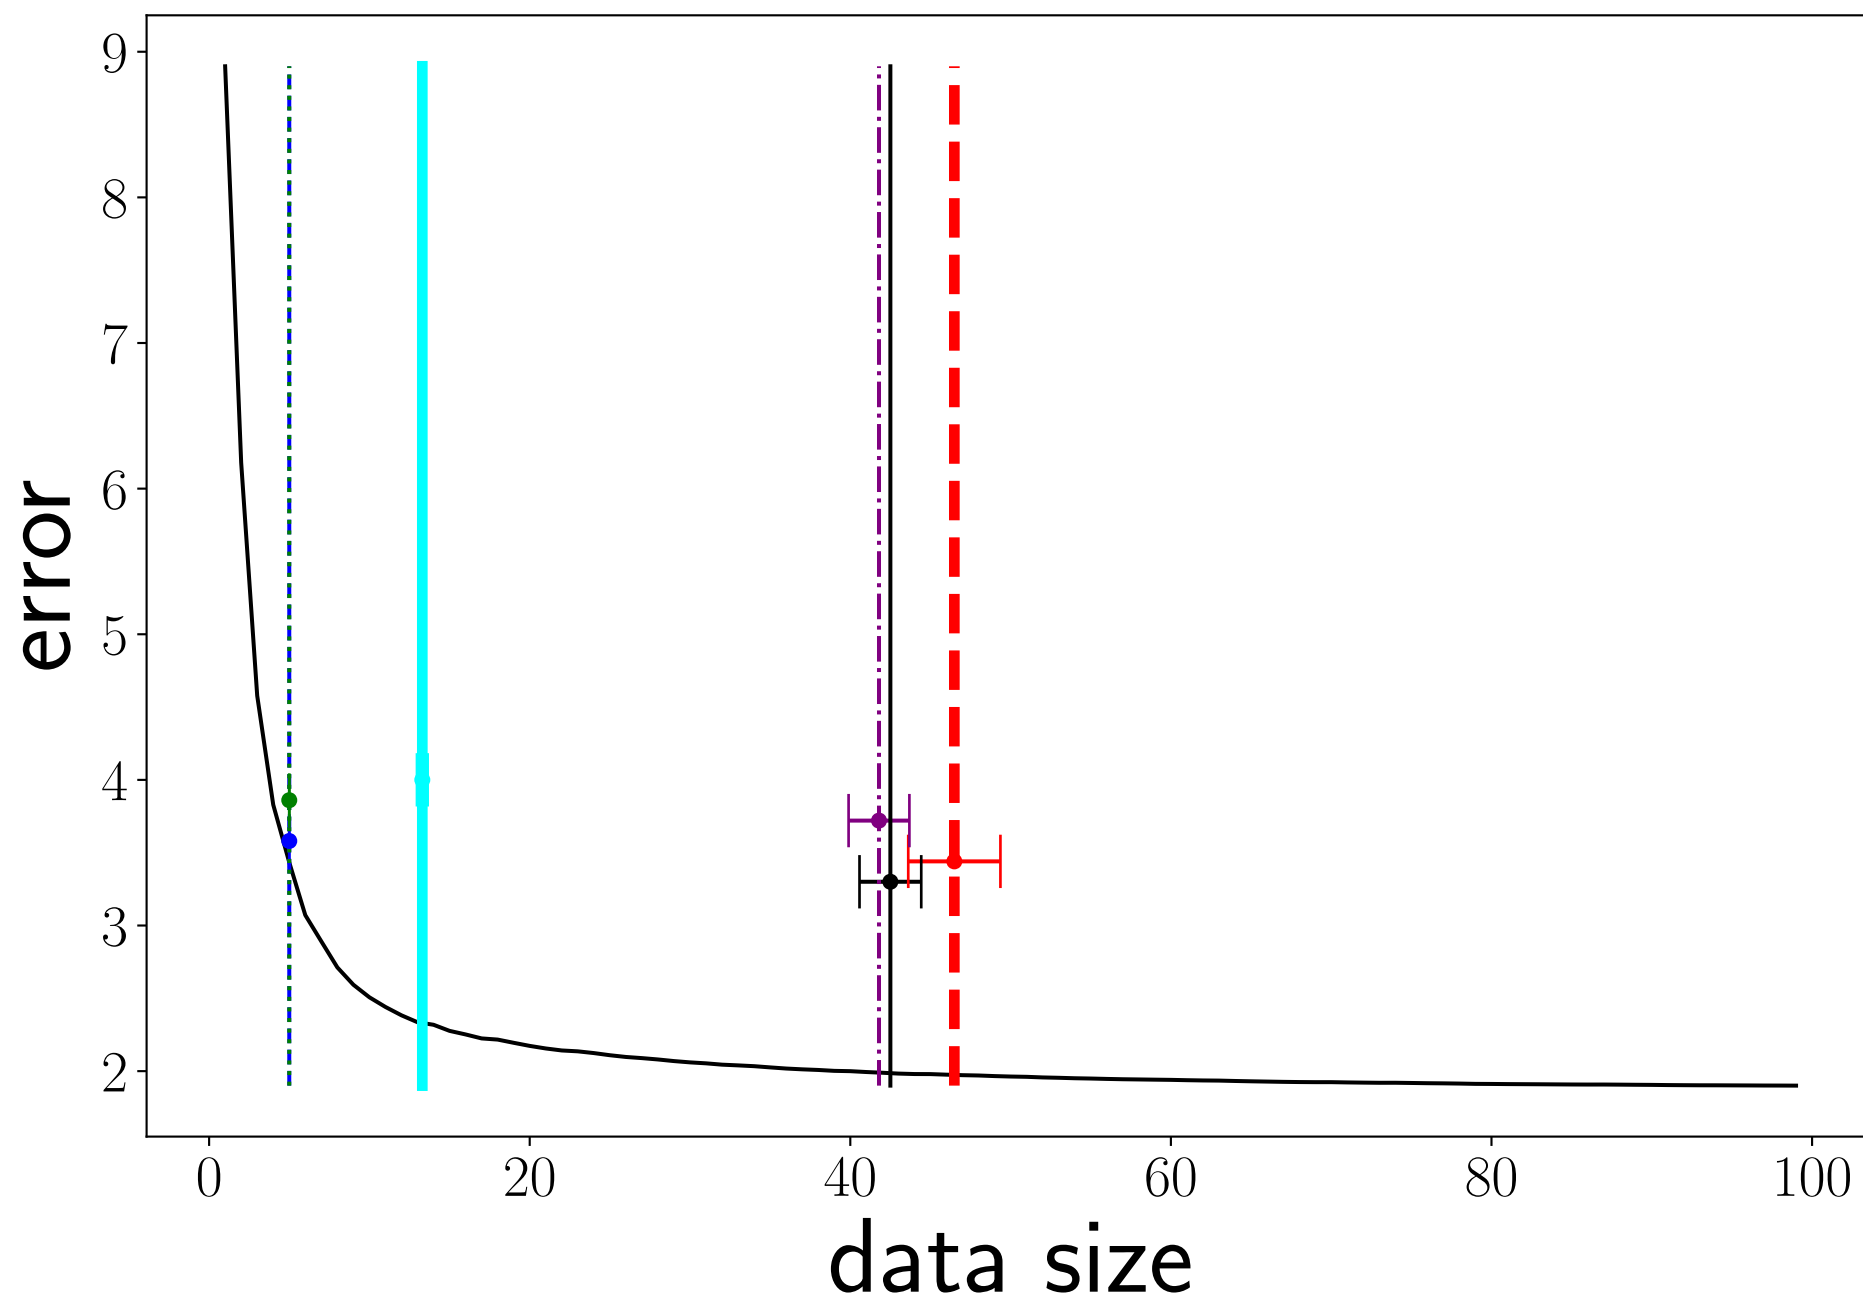

Supplement: Supplementary file 2 [file ishibashi20a-supp.zip › 137_supp/program/results/power_plant/ex_power_plant.pdf]

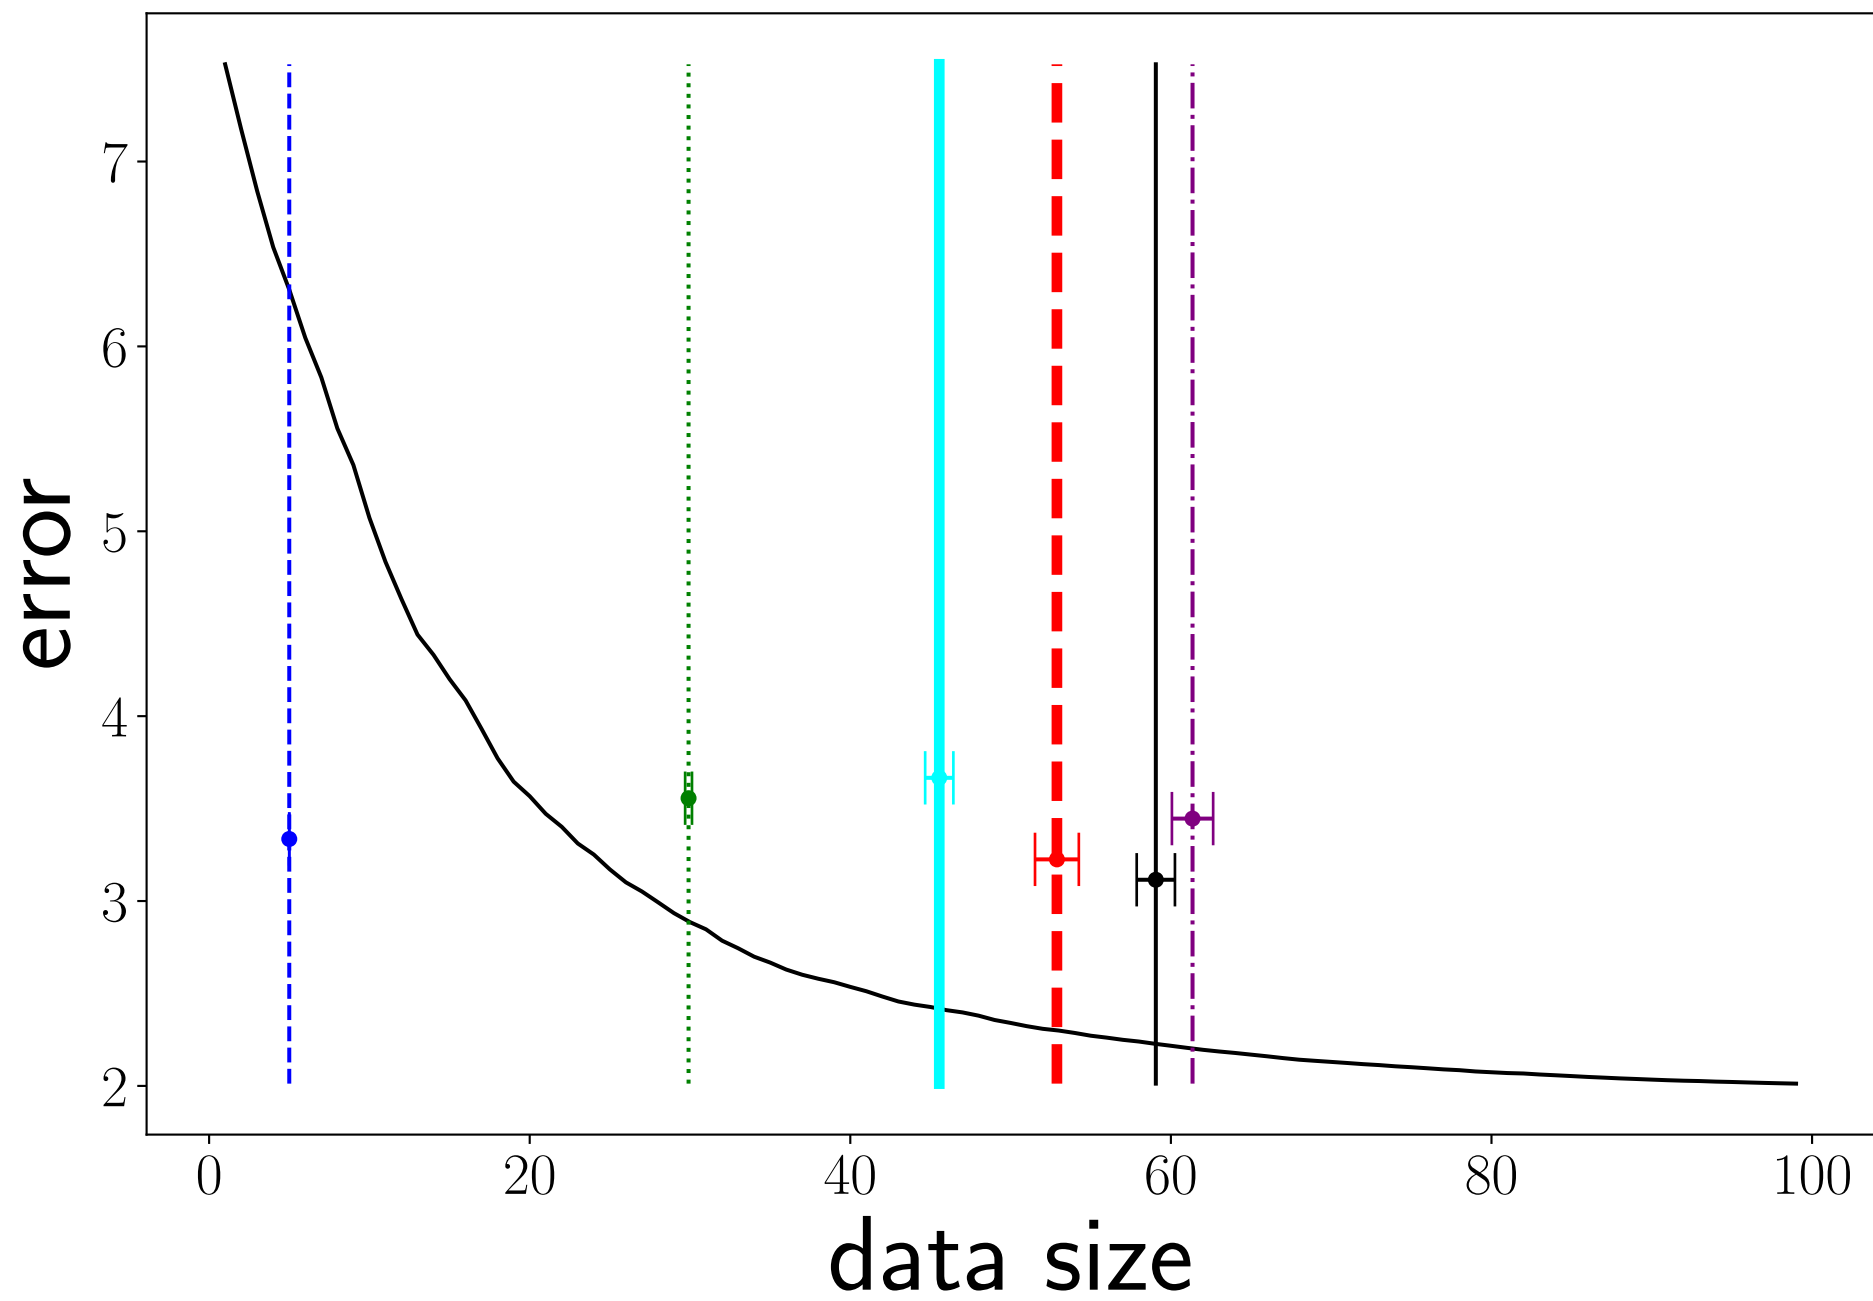

Supplement: Supplementary file 2 [file ishibashi20a-supp.zip › 137_supp/program/results/concrete/ex_concrete.pdf]

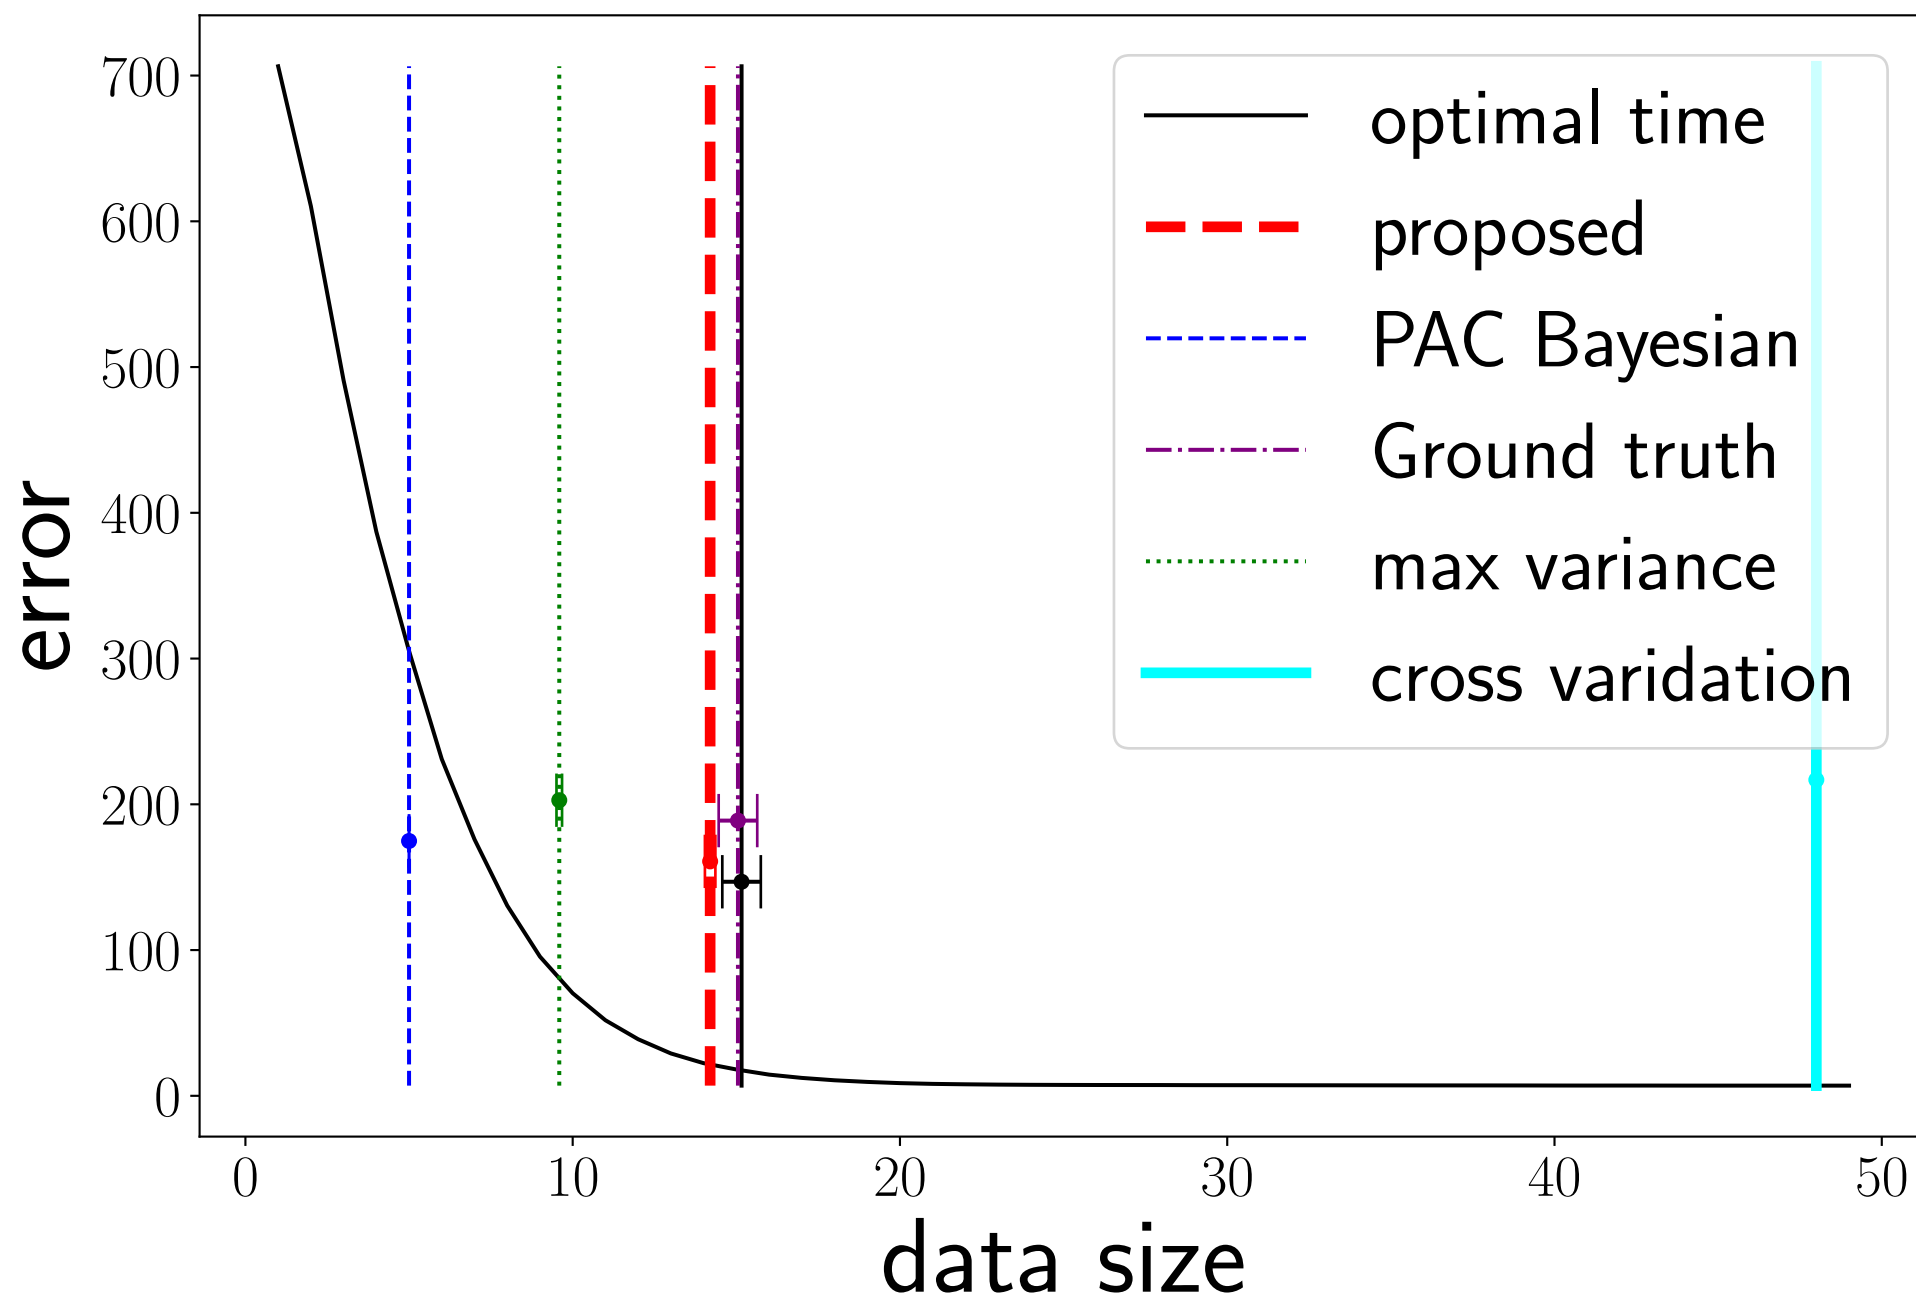

Supplement: Supplementary file 2 [file ishibashi20a-supp.zip › 137_supp/program/results/artificial/ex_artificial.pdf]

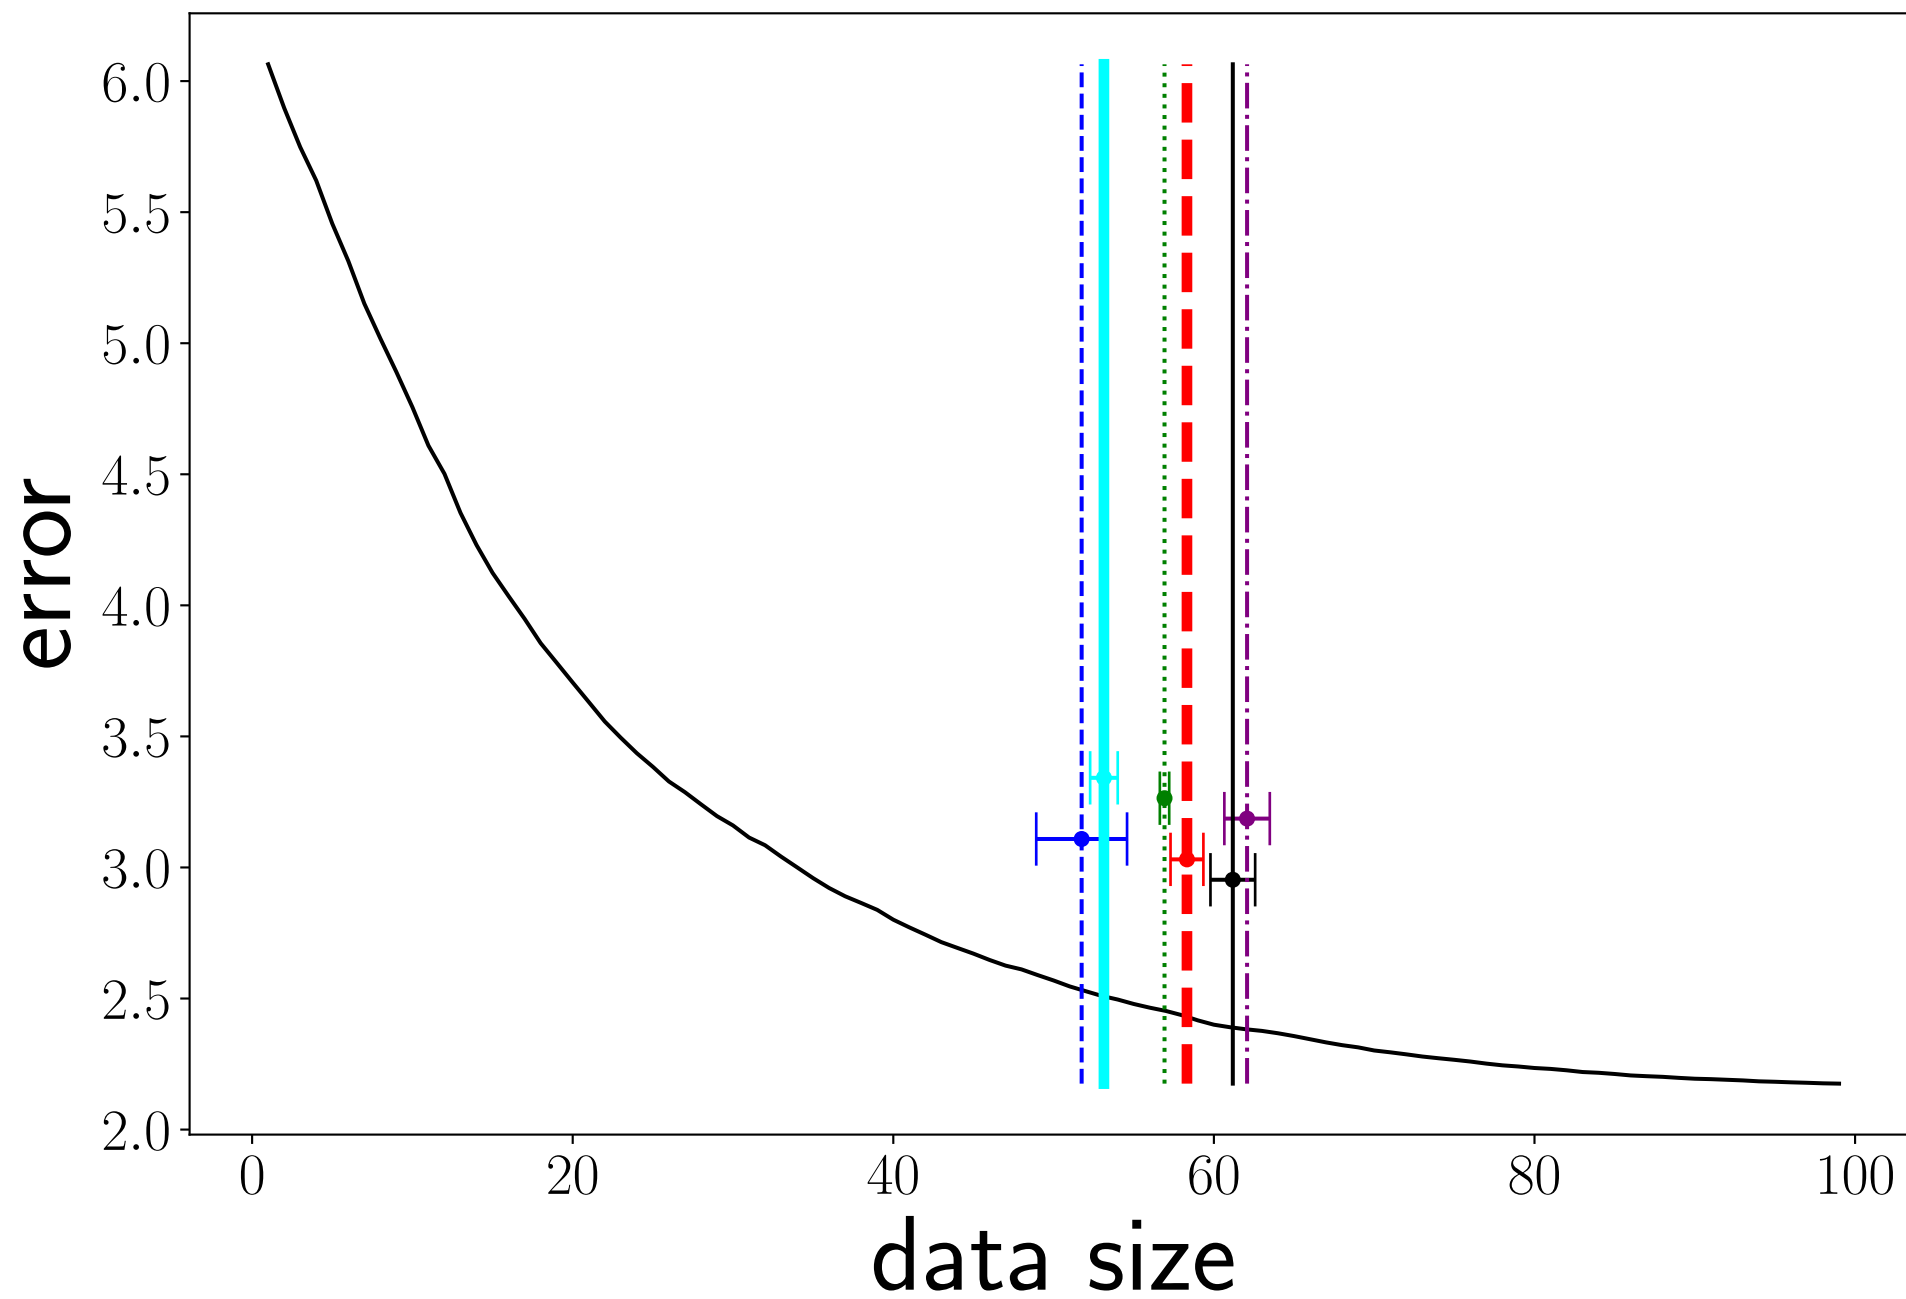

Supplement: Supplementary file 2 [file ishibashi20a-supp.zip › 137_supp/program/results/airfoil/ex_airfoil.pdf]

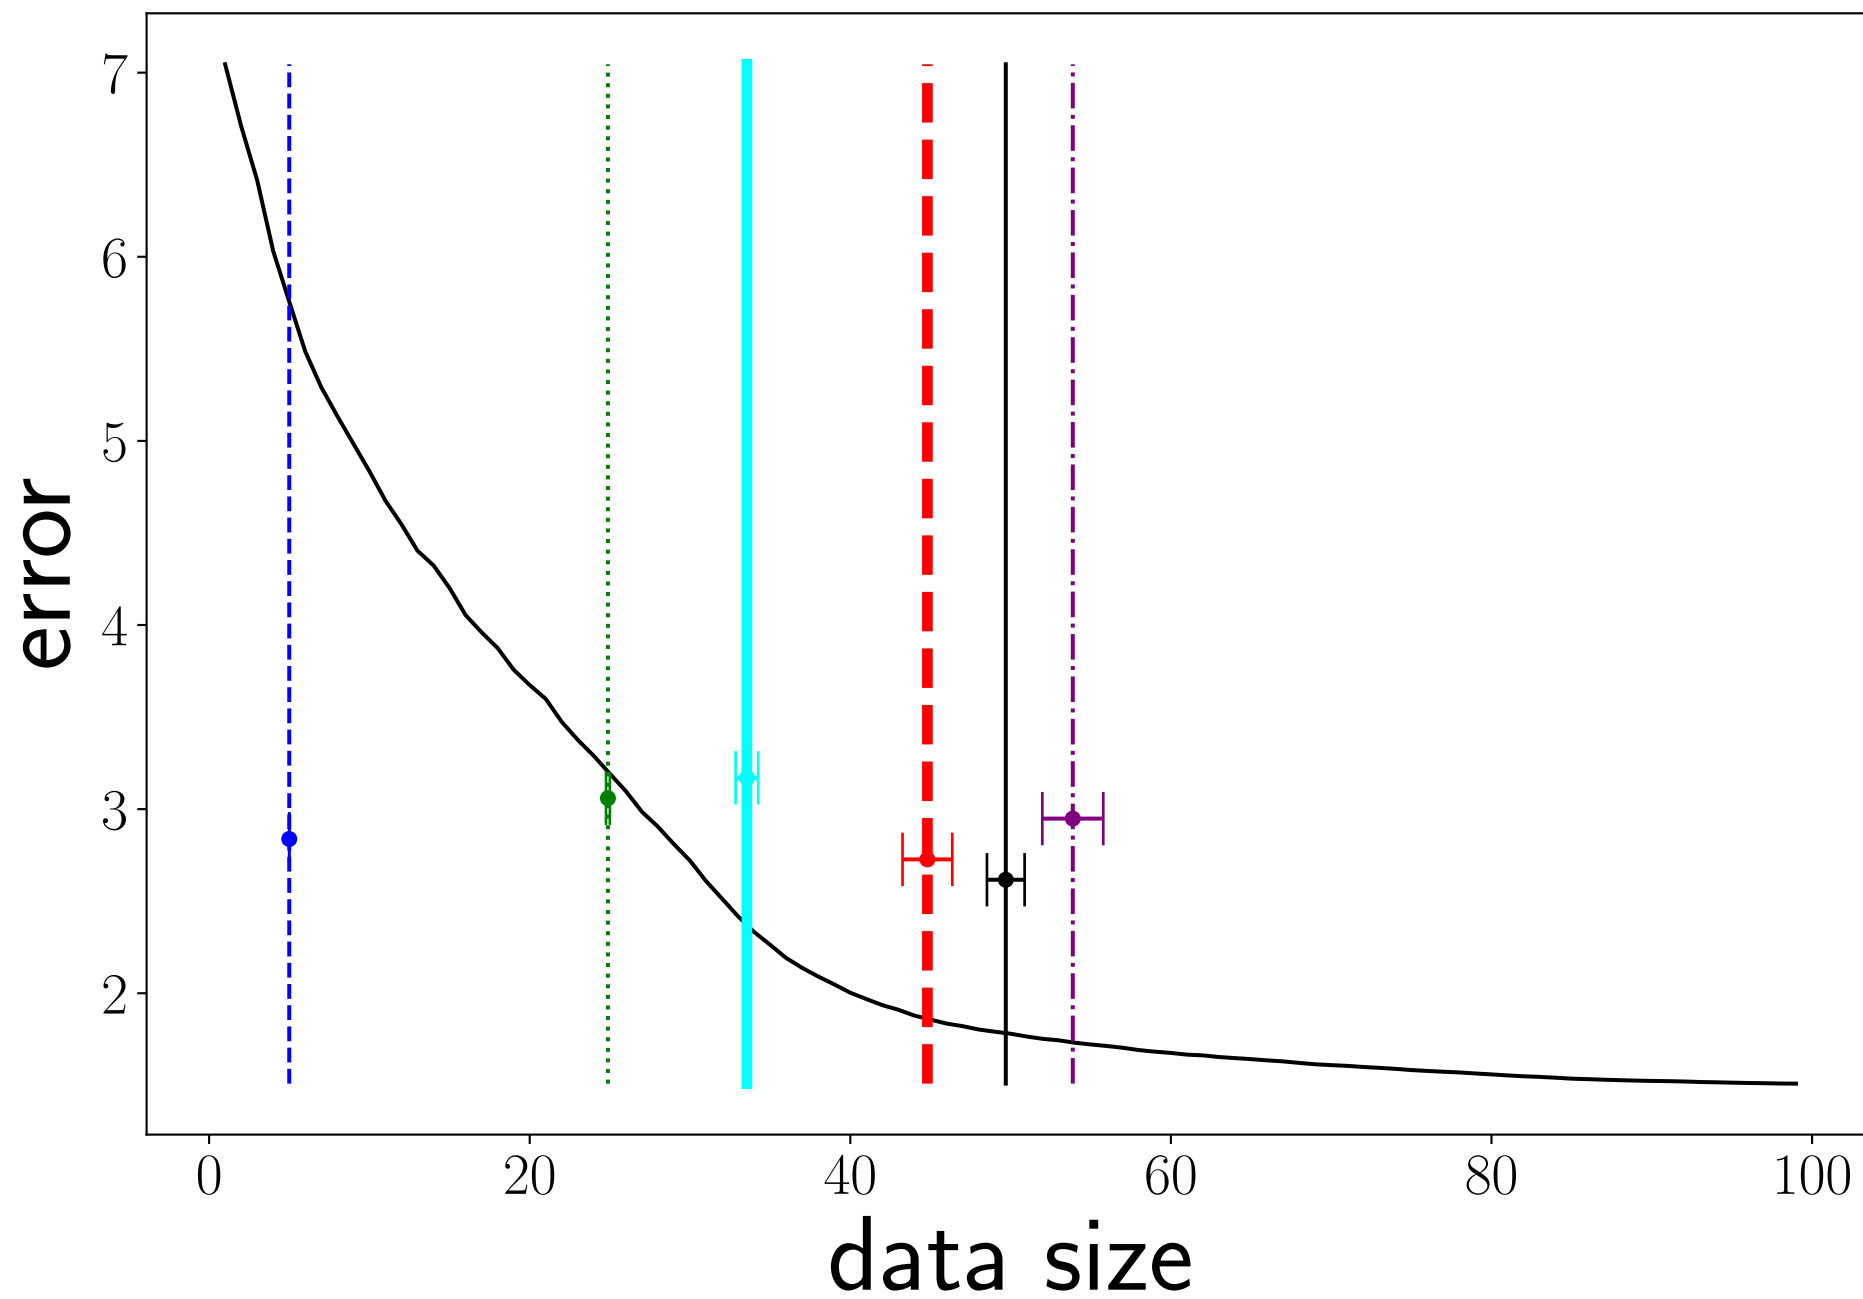

Supplement: Supplementary file 2 [file ishibashi20a-supp.zip › 137_supp/program/results/yacht/ex_yacht.pdf]

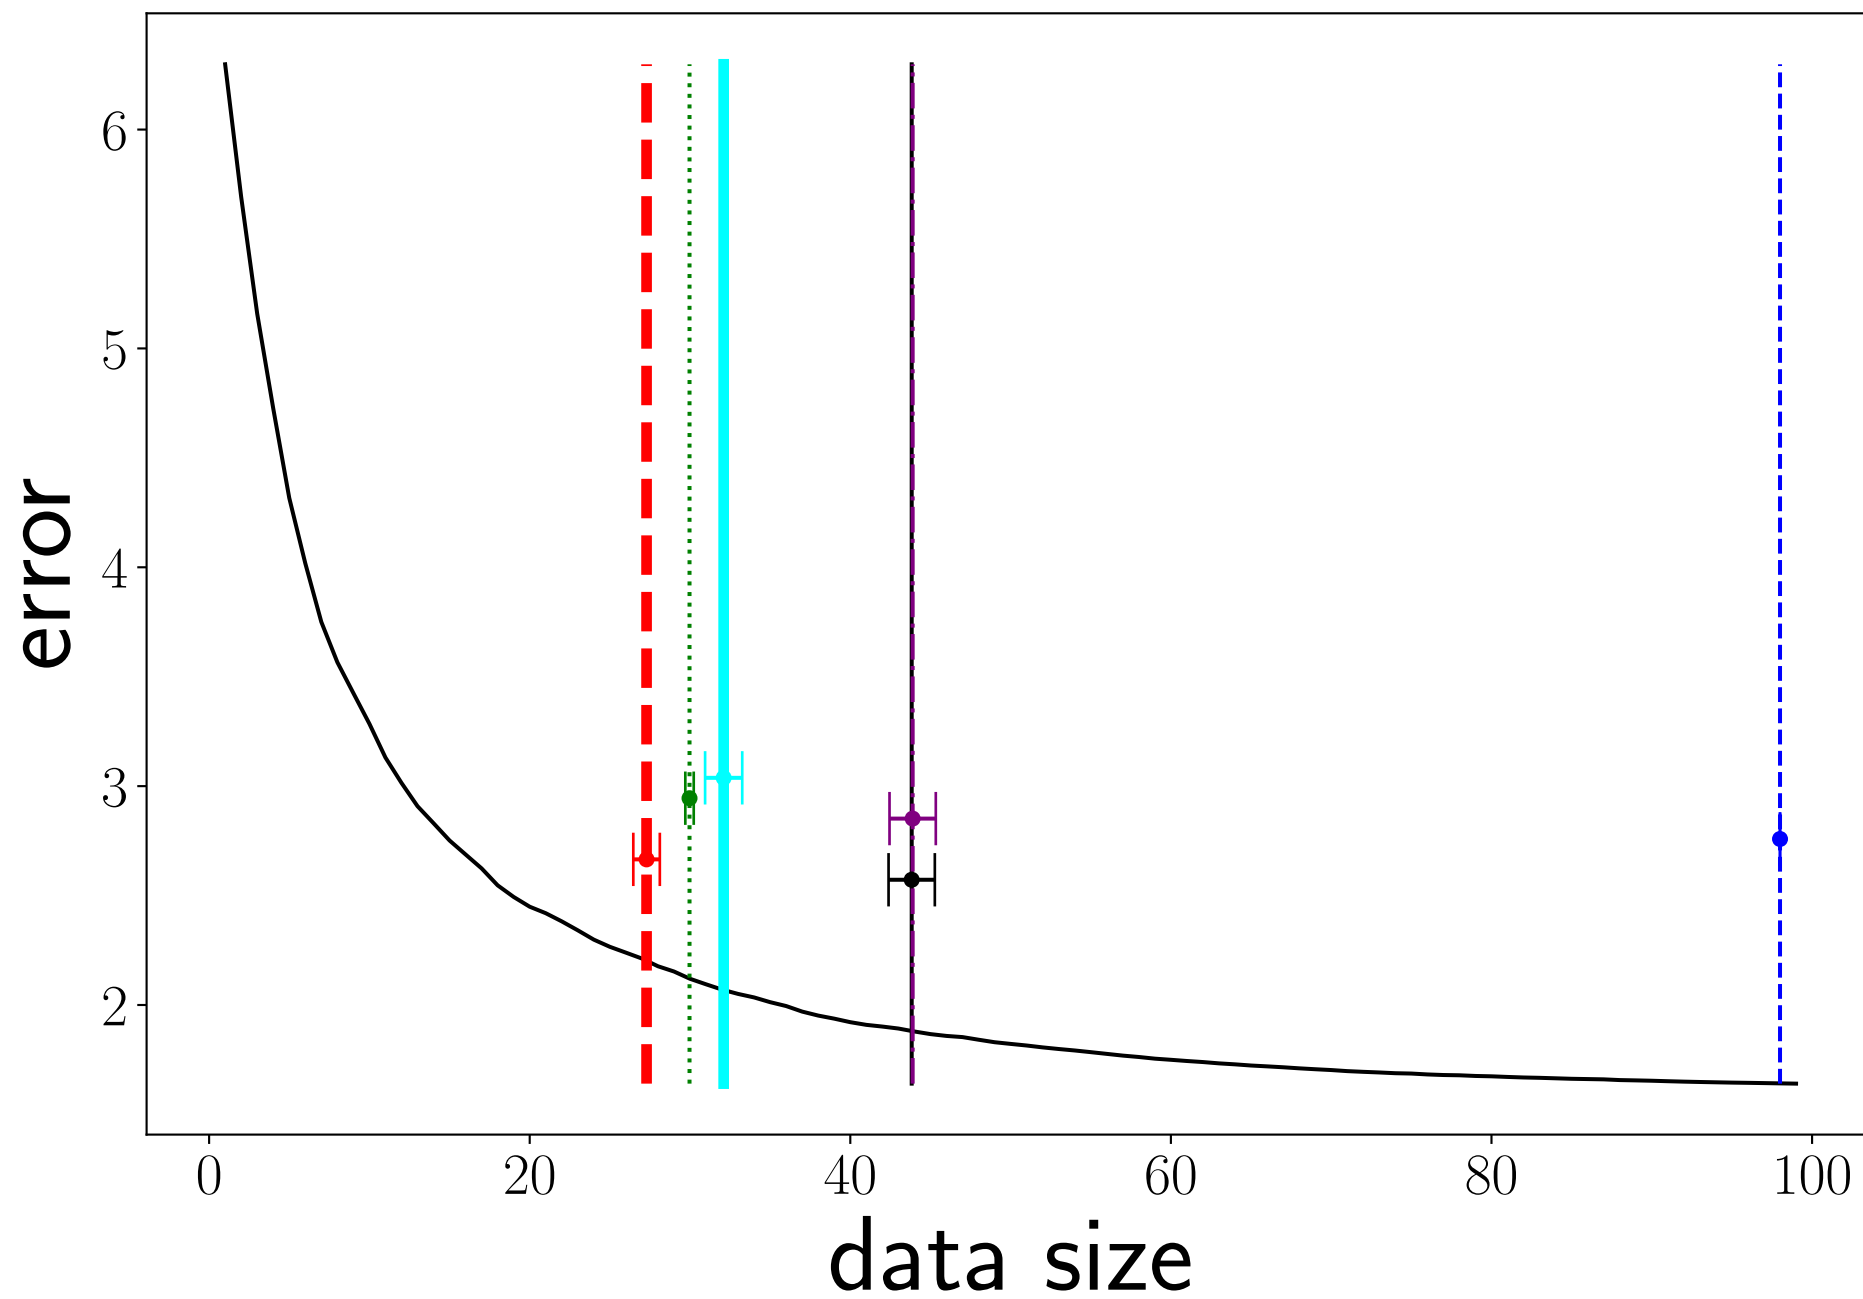

Supplement: Supplementary file 2 [file ishibashi20a-supp.zip › 137_supp/program/results/protein/ex_protein.pdf]
